# Supplementary material for: Spatiotemporal Brain Transcriptomics Reveal Risk Gene Hot-Spots in Major Neuropsychiatric Disorders
Source: Research Square preprint supplement (doi:10.21203/rs.3.rs-7667905/v1), 2025-10-08
Supplement: Supplementary file 1 [file Supplemental Table 1. Data supporting Fig. 2a, Enrichment of control gene sets in Brainspan samples.xlsx]

## Sheet: r_rank_biserial
	IQ_GWAS_2018NatGen	IQ_GWAS_2018NatGen_ExNS	SZ_GWAS_2022Nature_eQTL_Fetal	SZ_GWAS_2022Nature_eQTL_PEC.adult	BIP_GWAS_2021NatGen_eQTL_PEC.adult	SZ_High_Confi_Risk_PEC.adult	SZ_Risk_PEC.adult	Random_50	Random_100	Random_1000
M_8pcw_Ocx	0.555153	0.479164	0.144217	0.522353	0.424005	0.548012	0.499433	0.132528	0.0159284	0.0275174
M_8pcw_M1C.S1C	0.576652	0.510211	0.249478	0.543481	0.444856	0.557216	0.50888	0.141992	0.0346382	0.0224586
M_8pcw_AMY	0.582629	0.506764	0.195405	0.553934	0.472276	0.551253	0.510722	0.152501	0.042184	0.024622
M_8pcw_MGE	0.574057	0.485489	0.134591	0.551032	0.463974	0.550456	0.507842	0.163811	0.0427948	0.0245701
M_8pcw_STC	0.581058	0.498631	0.230919	0.551607	0.482382	0.560898	0.516228	0.143857	0.0508231	0.00795568
M_8pcw_URL	0.597264	0.518988	0.220399	0.552387	0.454054	0.561982	0.520901	0.131088	0.049633	0.0178343
M_8pcw_CGE	0.571254	0.482273	0.164285	0.56065	0.427118	0.559075	0.50685	0.13637	0.0671518	0.0249092
M_8pcw_DTH	0.568228	0.485167	0.255335	0.55915	0.427454	0.545709	0.494671	0.151252	0.0529333	0.0236125
M_8pcw_MFC	0.555114	0.467187	0.217611	0.550211	0.453822	0.545094	0.497227	0.143625	0.0393848	0.0161592
M_8pcw_DFC	0.536245	0.444762	0.111172	0.541559	0.442797	0.529919	0.488435	0.122614	0.0219028	0.0171797
M_8pcw_OFC	0.541399	0.463671	0.0339114	0.541196	0.4663	0.533059	0.49558	0.119447	0.0249334	0.0174036
M_8pcw_LGE	0.581698	0.496437	0.274259	0.557149	0.44459	0.560116	0.511892	0.138828	0.0494901	0.0276461
M_8pcw_ITC	0.588078	0.516153	0.229508	0.557204	0.477055	0.553817	0.510324	0.157949	0.0300217	0.0176877
M_8pcw_HIP	0.56162	0.484128	0.191861	0.535691	0.459324	0.54482	0.50779	0.110533	0.0365099	0.0126916
M_8pcw_VFC	0.56588	0.489358	0.154895	0.53688	0.448247	0.545291	0.499601	0.117729	0.0164897	0.0220181
M_8pcw_PCx	0.569054	0.486761	0.233859	0.545469	0.450512	0.561978	0.509064	0.159498	0.037192	0.0210411
M_9pcw_DFC	0.576558	0.515175	0.260174	0.530997	0.442081	0.559098	0.506614	0.128063	0.0531425	0.0139933
M_9pcw_MFC	0.582534	0.523248	0.269818	0.545902	0.454923	0.558988	0.510027	0.111811	0.0691859	0.0261364
M_9pcw_AMY	0.582337	0.512908	0.241941	0.555294	0.464594	0.549943	0.503465	0.16486	0.034584	0.0168586
M_9pcw_DTH	0.59437	0.518011	0.194198	0.563079	0.466812	0.548978	0.494814	0.129008	0.0696538	0.0179128
M_9pcw_URL	0.602539	0.533034	0.132517	0.544591	0.4776	0.553466	0.509395	0.13853	0.0622687	0.0235508
M_9pcw_LGE	0.582502	0.512467	0.226352	0.545878	0.43813	0.553519	0.504727	0.160652	0.066645	0.0245398
M_9pcw_M1C.S1C	0.573226	0.50515	0.249006	0.532422	0.420206	0.561432	0.506831	0.151191	0.0298063	0.0255732
M_9pcw_MGE	0.592188	0.532998	0.166805	0.557775	0.466345	0.557386	0.507343	0.158244	0.0483851	0.0192305
M_9pcw_TCx	0.589851	0.514143	0.305053	0.540685	0.479311	0.556296	0.503992	0.14967	0.0188445	0.0242481
M_9pcw_HIP	0.580911	0.523065	0.205241	0.553948	0.432631	0.551751	0.5071	0.130057	0.0257171	0.0168652
M_9pcw_Ocx	0.583884	0.515336	0.281874	0.545981	0.443043	0.559067	0.507842	0.148532	0.0286361	0.019704
M_9pcw_CGE	0.573334	0.495506	0.139597	0.556837	0.419651	0.558265	0.50389	0.137919	0.0538096	0.0174035
M_9pcw_OFC	0.580262	0.513857	0.150251	0.5475	0.481347	0.570366	0.521161	0.16046	0.0407422	0.022961
M_9pcw_PCx	0.587443	0.523539	0.276787	0.543804	0.462917	0.560758	0.509592	0.135837	0.0431295	0.020746
F_12pcw_HIP	0.572868	0.514968	0.136659	0.558008	0.475763	0.54567	0.507096	0.123169	0.0662791	0.0146539
F_12pcw_DTH	0.597576	0.536708	0.268497	0.5587	0.494043	0.563185	0.518778	0.195618	0.0691545	0.0183441
F_12pcw_AMY	0.576319	0.500621	0.187208	0.564344	0.465443	0.551465	0.510116	0.129583	0.0385631	0.0205388
F_12pcw_A1C	0.603552	0.534955	0.316559	0.573944	0.506461	0.56205	0.513922	0.160536	0.0621309	0.0242915
F_12pcw_V1C	0.594435	0.53773	0.301703	0.569835	0.484408	0.566118	0.514747	0.178855	0.0371452	0.0201884
F_12pcw_MFC	0.596852	0.532665	0.310421	0.564725	0.486209	0.556042	0.502917	0.126011	0.0510947	0.0133285
F_12pcw_STR	0.577269	0.482127	0.131725	0.569102	0.490473	0.530035	0.487685	0.153489	0.0630819	0.0121217
F_12pcw_M1C	0.601804	0.532615	0.310364	0.554846	0.491452	0.556566	0.508371	0.156673	0.0602963	0.0196338
F_12pcw_DFC	0.603502	0.532589	0.3106	0.565132	0.51445	0.551805	0.505797	0.174678	0.0476331	0.0161432
F_12pcw_ITC	0.594776	0.518355	0.177788	0.569725	0.490401	0.555593	0.509707	0.159958	0.0348718	0.0156029
F_12pcw_VFC	0.605487	0.543937	0.307384	0.55444	0.496533	0.55328	0.507485	0.138909	0.0584507	0.0196247
F_12pcw_STC	0.603101	0.542443	0.318956	0.568592	0.511511	0.570388	0.515194	0.167192	0.0506289	0.0232806
F_12pcw_IPC	0.606444	0.540321	0.313935	0.559027	0.499785	0.55672	0.511516	0.132758	0.0428153	0.0157376
F_12pcw_OFC	0.597897	0.528036	0.308419	0.563901	0.509215	0.548708	0.503682	0.123476	0.0790978	0.0174161
F_12pcw_S1C	0.595894	0.534014	0.314172	0.560161	0.493139	0.553483	0.499745	0.13768	0.0657433	0.0244173
F_12pcw_STC.1	0.594884	0.509146	0.215363	0.563948	0.513696	0.54628	0.494019	0.155015	0.035256	0.0161826
F_12pcw_V1C.1	0.591435	0.519018	0.322853	0.579282	0.492882	0.56347	0.507476	0.135751	0.0502298	0.0217441
F_12pcw_A1C.1	0.586362	0.512174	0.205904	0.555514	0.500664	0.53797	0.488556	0.130905	0.0385364	0.0155879
F_12pcw_CB	0.600304	0.527996	0.193406	0.561796	0.465244	0.539383	0.49506	0.160107	0.0477304	0.0249445
F_12pcw_ITC.1	0.59924	0.512908	0.219774	0.557558	0.493529	0.550073	0.502425	0.145845	0.0349387	0.0151679
F_12pcw_IPC.1	0.589811	0.506816	0.299034	0.568277	0.524838	0.546287	0.49787	0.126788	0.0370745	0.0260138
F_12pcw_S1C.1	0.589431	0.523762	0.219484	0.569687	0.502536	0.542913	0.491962	0.124771	0.0469691	0.00809586
F_12pcw_DTH.1	0.589623	0.499476	0.281599	0.576768	0.481388	0.536864	0.483793	0.150931	0.0520017	0.0176891
F_12pcw_HIP.1	0.580446	0.500524	0.1561	0.566904	0.454297	0.547002	0.502079	0.152825	0.0501305	0.0193381
F_12pcw_DFC.1	0.589793	0.526212	0.235288	0.563655	0.499235	0.533388	0.480974	0.175318	0.0338356	0.0171177
F_12pcw_OFC.1	0.573676	0.495985	0.266112	0.575514	0.474547	0.533687	0.483141	0.144475	0.0189662	0.0201568
F_12pcw_M1C.1	0.599243	0.542883	0.347025	0.576076	0.498593	0.546871	0.498023	0.14488	0.0269729	0.0167921
F_12pcw_VFC.1	0.586496	0.495806	0.287385	0.567791	0.516101	0.534799	0.48698	0.143878	0.039807	0.0213396
F_12pcw_AMY.1	0.593448	0.525496	0.223797	0.565831	0.510104	0.556344	0.517177	0.123583	0.0489353	0.022103
F_12pcw_STR.1	0.579026	0.510897	0.246414	0.564646	0.477759	0.54715	0.498406	0.151716	0.0640453	0.0221463
F_12pcw_AMY.2	0.584664	0.505682	0.21903	0.58251	0.519995	0.549787	0.503675	0.146586	0.0335731	0.0227774
F_12pcw_M1C.2	0.589512	0.50902	0.280505	0.560084	0.488581	0.539476	0.482623	0.14016	0.0329783	0.0184462
F_12pcw_ITC.2	0.581913	0.495974	0.178036	0.57668	0.486085	0.539765	0.493567	0.119159	0.0356011	0.0184339
F_12pcw_VFC.2	0.586308	0.50296	0.301294	0.561859	0.477183	0.533878	0.488575	0.14092	0.0468399	0.0200455
F_12pcw_STR.2	0.59191	0.509545	0.278037	0.585381	0.525513	0.561413	0.512472	0.162631	0.0650099	0.0275736
F_12pcw_CBC	0.580917	0.49341	0.235593	0.564768	0.468614	0.540652	0.498801	0.125381	0.0391102	0.0194806
F_12pcw_DTH.2	0.579472	0.486096	0.251534	0.563873	0.463127	0.536462	0.490621	0.106981	0.0530201	0.0124563
F_12pcw_DFC.2	0.585547	0.507065	0.288819	0.553961	0.490894	0.53938	0.48769	0.149305	0.0164755	0.020639
F_12pcw_OFC.2	0.595214	0.521096	0.294181	0.577189	0.481554	0.538103	0.493396	0.166997	0.0600448	0.0254286
F_12pcw_S1C.2	0.590482	0.510874	0.290182	0.551873	0.469536	0.549682	0.497047	0.144981	0.00875933	0.018797
F_12pcw_V1C.2	0.59137	0.518445	0.335878	0.568902	0.495802	0.558006	0.502086	0.12329	0.0301576	0.0167262
F_12pcw_MFC.1	0.596015	0.520383	0.308383	0.554406	0.490732	0.547104	0.497849	0.1404	0.0419562	0.0160413
F_12pcw_HIP.2	0.586792	0.512565	0.279818	0.570654	0.490015	0.555718	0.509029	0.158978	0.0555108	0.0273737
F_12pcw_IPC.2	0.571161	0.481563	0.244152	0.55257	0.46931	0.533718	0.475945	0.126211	0.0256593	0.0183071
F_12pcw_A1C.2	0.593461	0.501486	0.313182	0.559841	0.482593	0.547098	0.495932	0.159478	0.0450321	0.0165507
M_13pcw_STR	0.594541	0.516669	0.281252	0.58743	0.537218	0.562052	0.51367	0.143278	0.0677423	0.023473
M_13pcw_M1C	0.602461	0.533601	0.221304	0.567263	0.494682	0.557706	0.503622	0.11432	0.0515954	0.0173866
M_13pcw_AMY	0.599659	0.532021	0.193158	0.570285	0.512499	0.565514	0.516071	0.136766	0.0595176	0.0153724
M_13pcw_S1C	0.601422	0.520072	0.218639	0.565103	0.497106	0.560872	0.500548	0.138311	0.0541113	0.0198083
M_13pcw_V1C	0.597719	0.547863	0.222165	0.576171	0.505628	0.56957	0.510561	0.126328	0.0580423	0.0190318
M_13pcw_A1C	0.587201	0.500267	0.258381	0.567868	0.474331	0.546817	0.503103	0.108297	0.0434757	0.01814
M_13pcw_HIP	0.579736	0.502339	0.172232	0.56811	0.499625	0.554143	0.511954	0.142789	0.0505106	0.00642753
M_13pcw_VFC	0.603396	0.53704	0.230808	0.569433	0.468757	0.555394	0.500676	0.12434	0.0505679	0.0148756
M_13pcw_MFC	0.59439	0.516525	0.0888654	0.565962	0.462972	0.54214	0.492443	0.128194	0.0506454	0.0198833
M_13pcw_STC	0.606952	0.539368	0.278515	0.573021	0.504895	0.57138	0.517607	0.163699	0.0546717	0.0209224
M_13pcw_OFC	0.590308	0.516382	0.145654	0.565561	0.482273	0.553753	0.502202	0.125556	0.0177878	0.0167797
M_13pcw_IPC	0.601282	0.530259	0.221806	0.578216	0.498493	0.560435	0.504066	0.145142	0.0352131	0.0200325
M_13pcw_DFC	0.600372	0.519709	0.199954	0.578886	0.516943	0.551045	0.502016	0.165347	0.0492174	0.0182428
M_13pcw_ITC	0.600095	0.536796	0.212924	0.563158	0.48242	0.561909	0.51405	0.147971	0.0496889	0.0198539
F_13pcw_STR	0.591283	0.538629	0.270822	0.5704	0.503597	0.572308	0.522901	0.144665	0.0589028	0.022162
F_13pcw_S1C	0.604144	0.551241	0.263948	0.56829	0.501827	0.553757	0.504474	0.175817	0.0150892	0.01974
F_13pcw_V1C	0.596567	0.536912	0.259696	0.55963	0.489042	0.572584	0.520228	0.112731	0.0446226	0.020625
F_13pcw_AMY	0.595675	0.53612	0.202139	0.564827	0.492321	0.571497	0.526642	0.176208	0.0479028	0.0189245
F_13pcw_IPC	0.594905	0.534683	0.335122	0.553155	0.471578	0.550547	0.505342	0.134334	0.0291542	0.0137533
F_13pcw_CB	0.594042	0.533295	0.286267	0.55762	0.487251	0.561124	0.523127	0.146193	0.0361544	0.0226876
F_13pcw_DFC	0.599232	0.537104	0.334838	0.565406	0.502005	0.556119	0.504651	0.117149	0.0357083	0.0272312
F_13pcw_OFC	0.593624	0.532111	0.272478	0.54738	0.489154	0.545785	0.496644	0.121182	0.0415272	0.0275814
F_13pcw_STC	0.587292	0.523203	0.319437	0.557374	0.474188	0.550126	0.496198	0.158642	0.0200254	0.0139038
F_13pcw_A1C	0.603771	0.525947	0.207264	0.571631	0.482157	0.568877	0.514404	0.146114	0.0275246	0.0137069
F_13pcw_HIP	0.594784	0.545456	0.309907	0.557365	0.486882	0.565468	0.520976	0.173355	0.0372659	0.0208198
F_13pcw_M1C	0.597521	0.528497	0.368352	0.561574	0.505537	0.55173	0.496411	0.165632	0.0444964	0.0262299
F_13pcw_ITC	0.591993	0.515422	0.301342	0.565168	0.473563	0.553154	0.499526	0.130124	0.0223616	0.0149432
F_13pcw_MD	0.590601	0.517113	0.202892	0.565353	0.491837	0.560301	0.508081	0.144075	0.0317374	0.0125571
F_13pcw_MFC	0.600726	0.548882	0.322094	0.56609	0.483503	0.566713	0.514925	0.140591	0.0533868	0.0225826
F_13pcw_VFC	0.603886	0.533747	0.34776	0.557512	0.466496	0.550474	0.504323	0.136674	0.049623	0.0116981
M_13pcw_S1C.1	0.589475	0.520072	0.267606	0.556067	0.484994	0.545132	0.491226	0.130074	0.0320296	0.0169589
M_13pcw_DFC.1	0.583706	0.511965	0.31323	0.552139	0.47576	0.53959	0.489738	0.117319	0.0562891	0.0203723
M_13pcw_CB	0.595888	0.532644	0.247368	0.548185	0.455883	0.562427	0.51471	0.170012	0.046852	0.0211296
M_13pcw_AMY.1	0.587146	0.516184	0.207243	0.565033	0.435688	0.557598	0.512915	0.145888	0.0439734	0.0215051
M_13pcw_ITC.1	0.583101	0.50473	0.270069	0.553442	0.453592	0.549977	0.498373	0.134717	0.0133552	0.0163455
M_13pcw_HIP.1	0.578802	0.521769	0.234956	0.562821	0.424487	0.558944	0.51071	0.141545	0.0626286	0.0150094
M_13pcw_IPC.1	0.589245	0.53334	0.303822	0.563994	0.48602	0.551964	0.497514	0.142953	0.0283997	0.0165154
M_13pcw_A1C.1	0.589979	0.527152	0.274065	0.574453	0.424916	0.539941	0.488712	0.112697	0.0312733	0.0170901
M_13pcw_VFC.1	0.58088	0.517612	0.229197	0.540533	0.509035	0.533941	0.481925	0.165033	0.0236385	0.0212375
M_13pcw_STR.1	0.570523	0.495798	0.25934	0.553711	0.47751	0.544638	0.493721	0.151277	0.0596264	0.0143664
M_13pcw_OFC.1	0.567381	0.492205	0.0858171	0.538888	0.484623	0.526279	0.487879	0.142409	0.00791478	0.0227008
M_13pcw_MFC.1	0.56648	0.495055	0.191655	0.540021	0.450897	0.531663	0.485125	0.157216	0.03523	0.0142439
M_13pcw_V1C.1	0.58444	0.520453	0.324769	0.559864	0.467481	0.566937	0.507867	0.175495	0.0338659	0.024691
M_13pcw_M1C.1	0.590932	0.525618	0.338938	0.555006	0.483654	0.547563	0.492967	0.184577	0.0506706	0.0165317
M_16pcw_VFC	0.59868	0.532378	0.229412	0.551357	0.524798	0.568124	0.517526	0.130937	0.0414317	0.0261812
M_16pcw_OFC	0.59696	0.546366	0.297409	0.578781	0.494991	0.563588	0.51972	0.115958	0.0404923	0.0188715
M_16pcw_STC	0.588962	0.524035	0.230584	0.556629	0.489177	0.566247	0.520358	0.141858	0.0230526	0.018882
M_16pcw_DFC	0.582087	0.523759	0.229634	0.557769	0.496044	0.559243	0.513931	0.12062	0.0403774	0.0233077
M_16pcw_IPC	0.594379	0.521795	0.235736	0.561081	0.520225	0.56632	0.511299	0.152406	0.0225526	0.0251762
M_16pcw_A1C	0.601346	0.545439	0.28327	0.553997	0.518932	0.571796	0.516484	0.154772	0.0240894	0.0274228
M_16pcw_MFC	0.578664	0.530737	0.247637	0.559562	0.477924	0.562608	0.523663	0.136513	0.0606725	0.0192602
M_16pcw_STR	0.595419	0.539837	0.186706	0.577509	0.558107	0.565704	0.518441	0.188267	0.0838537	0.0211742
M_16pcw_MD	0.590889	0.505382	0.209709	0.590483	0.542172	0.547705	0.514971	0.139063	0.0653656	0.0277567
M_16pcw_V1C	0.588944	0.520003	0.193789	0.564644	0.508696	0.573245	0.518027	0.196208	0.0317254	0.0138969
M_16pcw_VFC.1	0.617525	0.561777	0.326171	0.561303	0.489474	0.567901	0.520051	0.154161	0.0446264	0.0231563
M_16pcw_STC.1	0.602625	0.543794	0.335462	0.565994	0.471363	0.576532	0.527213	0.15319	0.0340223	0.0310471
M_16pcw_IPC.1	0.609716	0.549777	0.269884	0.557881	0.504513	0.570077	0.515175	0.130483	0.0518004	0.0257041
M_16pcw_A1C.1	0.607478	0.545602	0.326864	0.584702	0.50614	0.559255	0.516523	0.171585	0.0533478	0.0231203
M_16pcw_MD.1	0.602186	0.538609	0.288921	0.590395	0.530134	0.557795	0.517181	0.126353	0.0398076	0.0292112
M_16pcw_AMY	0.590557	0.528392	0.240088	0.567481	0.489866	0.57188	0.530578	0.139989	0.0538058	0.0173251
M_16pcw_V1C.1	0.598382	0.541263	0.301661	0.561622	0.512783	0.56968	0.523822	0.164704	0.0344339	0.0268116
M_16pcw_ITC	0.612622	0.554262	0.226591	0.563879	0.508161	0.562486	0.522089	0.152703	0.0490939	0.0249263
M_16pcw_CBC	0.574982	0.510931	0.0772638	0.569986	0.456981	0.550217	0.517683	0.143232	0.0568133	0.0179747
M_16pcw_HIP	0.606653	0.545139	0.29413	0.565742	0.525783	0.56655	0.528839	0.154732	0.0697727	0.0215683
M_16pcw_STR.1	0.606461	0.545384	0.276489	0.586851	0.539988	0.576159	0.529137	0.159284	0.0639428	0.0242479
M_16pcw_OFC.1	0.611425	0.545601	0.224619	0.557901	0.502115	0.566763	0.521685	0.142452	0.0268988	0.0218616
M_16pcw_DFC.1	0.613673	0.554158	0.360946	0.56239	0.480698	0.569096	0.519295	0.137008	0.0703808	0.0231796
M_16pcw_M1C	0.610701	0.543919	0.332345	0.577203	0.504375	0.556092	0.501367	0.119604	0.0561561	0.0320056
M_16pcw_MFC.1	0.612121	0.563035	0.313684	0.569895	0.461271	0.563179	0.522463	0.155782	0.0544888	0.0304073
M_16pcw_S1C	0.607227	0.543729	0.228375	0.555947	0.521537	0.561144	0.513121	0.147619	0.0404565	0.0257385
M_16pcw_HIP.1	0.584693	0.510357	0.123838	0.561408	0.489583	0.565342	0.517469	0.147351	0.0643463	0.0292031
M_16pcw_ITC.1	0.593889	0.517982	0.163903	0.571493	0.50309	0.564881	0.511586	0.130473	0.0629068	0.0161413
M_16pcw_DFC.2	0.58609	0.504818	0.00399573	0.532337	0.482685	0.540267	0.496244	0.12242	0.0200309	0.00978467
M_16pcw_IPC.2	0.608145	0.52847	0.180008	0.572055	0.508442	0.575182	0.525819	0.164432	0.0489241	0.0200866
M_16pcw_STC.2	0.603251	0.539359	0.147325	0.560733	0.502018	0.573797	0.521707	0.168554	0.0559425	0.0115172
M_16pcw_V1C.2	0.583547	0.505157	0.0916657	0.567852	0.513809	0.550293	0.503903	0.113992	0.0299359	0.0149027
M_16pcw_MD.2	0.575954	0.494434	0.165038	0.587638	0.49264	0.538731	0.494263	0.141234	0.0579873	0.0134702
M_16pcw_STR.2	0.593169	0.514185	0.0398348	0.562637	0.560642	0.566908	0.516616	0.137714	0.0884889	0.0154778
M_16pcw_M1C.S1C	0.609743	0.534185	0.250518	0.570309	0.509607	0.570938	0.516984	0.151104	0.0423841	0.0185293
M_16pcw_A1C.2	0.597975	0.520459	0.138586	0.568482	0.505085	0.554564	0.511682	0.122832	0.0402025	0.0191966
M_16pcw_VFC.2	0.610478	0.527216	0.161204	0.562759	0.509415	0.568709	0.519272	0.190231	0.0466871	0.0115733
M_16pcw_AMY.1	0.599489	0.516348	0.191386	0.578742	0.529036	0.565925	0.519312	0.143702	0.0619854	0.0197082
M_16pcw_MFC.2	0.587667	0.504986	0.166285	0.548413	0.503471	0.549031	0.512261	0.115617	0.040132	0.015576
F_17pcw_STR	0.588214	0.531877	0.179948	0.577103	0.560997	0.567349	0.529609	0.151469	0.0523845	0.0263056
F_17pcw_STC	0.597028	0.549033	0.391059	0.58874	0.493457	0.574759	0.522147	0.185695	0.0419496	0.0286588
F_17pcw_MD	0.592245	0.520208	0.274952	0.577625	0.507088	0.561303	0.519861	0.161342	0.0342785	0.0216548
F_17pcw_A1C	0.59997	0.531381	0.332082	0.580898	0.528487	0.562995	0.512788	0.150728	0.0384249	0.0107878
F_17pcw_HIP	0.593477	0.548159	0.285137	0.577606	0.53124	0.570228	0.536714	0.161131	0.0548394	0.0256796
F_17pcw_DFC	0.604886	0.551805	0.334162	0.56606	0.500792	0.570251	0.522547	0.144804	0.0364631	0.0297297
F_17pcw_VFC	0.607804	0.561859	0.338968	0.568704	0.507586	0.576326	0.531051	0.186227	0.0319329	0.0270111
F_17pcw_IPC	0.596188	0.520618	0.332241	0.575854	0.491784	0.559264	0.502147	0.187318	0.0527345	0.0201609
F_17pcw_M1C.S1C	0.602988	0.542964	0.325322	0.585717	0.509325	0.565743	0.517713	0.139926	0.0311698	0.0198732
F_17pcw_V1C	0.598407	0.546687	0.315373	0.559199	0.493076	0.587707	0.532221	0.179385	0.0427812	0.026149
F_17pcw_CBC	0.591807	0.525959	0.192503	0.561685	0.51667	0.557218	0.519118	0.172925	0.0553461	0.0352595
F_17pcw_OFC	0.607378	0.554052	0.312393	0.564845	0.533548	0.570397	0.523023	0.15998	0.0622579	0.0291779
F_17pcw_AMY	0.595091	0.531936	0.282992	0.570038	0.501502	0.572587	0.526566	0.162068	0.0442586	0.0204231
F_17pcw_MFC	0.603259	0.551511	0.332506	0.572341	0.505244	0.569795	0.521917	0.172897	0.03846	0.0263255
F_19pcw_STC	0.591515	0.529577	0.350055	0.578629	0.486149	0.568385	0.52067	0.158147	0.0284551	0.0161439
F_19pcw_IPC	0.589989	0.526986	0.375231	0.567141	0.493303	0.568524	0.522566	0.135942	0.0276777	0.0177217
F_19pcw_M1C.S1C	0.589463	0.511336	0.331162	0.569533	0.465186	0.573643	0.524293	0.135184	0.0365416	0.0234346
F_19pcw_MFC	0.597954	0.555395	0.296428	0.570063	0.491242	0.577155	0.533149	0.161939	0.0347172	0.0218932
F_19pcw_V1C	0.589594	0.527995	0.358041	0.583201	0.460598	0.578654	0.530667	0.135293	0.0174393	0.021264
F_19pcw_HIP	0.577592	0.530769	0.210435	0.569727	0.493166	0.561909	0.528015	0.156262	0.0546846	0.0279504
F_19pcw_A1C	0.591534	0.535505	0.387628	0.567449	0.505082	0.562149	0.520292	0.148028	0.0411544	0.021869
F_19pcw_MD	0.58832	0.522621	0.339745	0.581968	0.495557	0.56119	0.521688	0.173386	0.0368298	0.0236249
F_19pcw_VFC	0.607524	0.549005	0.352034	0.586323	0.490892	0.577659	0.525682	0.146964	0.0497992	0.023143
F_19pcw_STR	0.586883	0.536103	0.270484	0.56455	0.526453	0.574826	0.531672	0.136891	0.0403687	0.0184706
F_19pcw_DFC	0.594157	0.544373	0.332931	0.565411	0.473237	0.566536	0.521584	0.172215	0.0310339	0.0283405
F_21pcw_CBC	0.598644	0.536197	0.26191	0.582615	0.485223	0.545775	0.509067	0.190084	0.0457972	0.022952
F_21pcw_ITC	0.59971	0.541922	0.381274	0.5687	0.521451	0.566463	0.520973	0.164621	0.0391866	0.0217888
M_21pcw_MFC	0.60715	0.529952	0.290613	0.578909	0.548497	0.571492	0.516092	0.169935	0.0450611	0.0155361
M_21pcw_M1C	0.607769	0.536352	0.289626	0.557955	0.541572	0.567195	0.516376	0.139151	0.0607792	0.0267978
M_21pcw_STR	0.592843	0.521636	0.163879	0.578013	0.591929	0.573256	0.523177	0.13209	0.0645053	0.0228285
M_21pcw_HIP	0.606773	0.547264	0.214099	0.588464	0.538411	0.569179	0.526144	0.138164	0.0586383	0.0214328
M_21pcw_STC	0.612247	0.536742	0.318113	0.570053	0.539258	0.571443	0.525968	0.13857	0.0453414	0.0193509
M_21pcw_ITC	0.613197	0.540748	0.257308	0.585041	0.533361	0.573996	0.520285	0.1159	0.0277067	0.0226809
M_21pcw_AMY	0.603079	0.537349	0.251988	0.57146	0.529626	0.561393	0.521579	0.162554	0.0132178	0.0158112
M_21pcw_VFC	0.603743	0.53247	0.249173	0.570419	0.528128	0.570481	0.527251	0.14764	0.0503024	0.0166777
M_21pcw_OFC	0.597458	0.526356	0.189198	0.554546	0.52113	0.566168	0.511003	0.149552	0.0177149	0.0135768
M_21pcw_V1C	0.610795	0.535781	0.306147	0.591409	0.529983	0.579863	0.528963	0.155215	0.0348601	0.0242117
M_21pcw_S1C	0.608565	0.538925	0.305836	0.574463	0.5298	0.564464	0.514753	0.128946	0.0472689	0.015825
M_21pcw_CBC	0.594015	0.527608	0.124283	0.576879	0.523333	0.552107	0.515028	0.148661	0.0536614	0.0226972
M_21pcw_IPC	0.606762	0.532783	0.185429	0.569235	0.491435	0.573172	0.516417	0.141656	0.0365376	0.0256123
M_21pcw_DFC	0.605161	0.528625	0.293243	0.57905	0.55821	0.577939	0.530414	0.170272	0.027141	0.0192604
M_24pcw_HIP	0.590023	0.520972	0.186957	0.582323	0.525647	0.553898	0.524057	0.193379	0.0454252	0.00472321
M_24pcw_AMY	0.582569	0.515711	0.286261	0.561741	0.492433	0.567074	0.522205	0.149112	0.0385386	0.013077
M_24pcw_DFC	0.607672	0.533274	0.286602	0.583653	0.511527	0.560172	0.513273	0.146775	0.0171007	0.013347
M_24pcw_S1C	0.611931	0.5413	0.317235	0.597908	0.566504	0.569592	0.522893	0.157803	0.0410788	0.0111124
M_24pcw_MD	0.58506	0.516475	0.146411	0.589817	0.539058	0.553672	0.514443	0.126276	0.0487609	0.0193922
M_24pcw_STR	0.597422	0.543773	0.179094	0.602077	0.568867	0.572975	0.52787	0.138121	0.0746279	0.0207794
M_24pcw_A1C	0.599188	0.526605	0.197082	0.589861	0.56205	0.56631	0.516855	0.142413	0.0319786	0.0116991
M_24pcw_IPC	0.600121	0.518954	0.31161	0.585759	0.557566	0.56038	0.513829	0.115009	0.0235673	0.0150806
M_24pcw_OFC	0.597156	0.514507	0.186646	0.578748	0.542535	0.561483	0.509181	0.161595	0.00376144	0.0118304
M_24pcw_STC	0.594871	0.525509	0.321993	0.582226	0.537068	0.56724	0.524279	0.134785	0.0208092	0.0172304
M_24pcw_ITC	0.60723	0.533083	0.331039	0.588721	0.537314	0.568767	0.514464	0.141558	0.0324425	0.0132629
M_24pcw_VFC	0.605082	0.532164	0.311634	0.59523	0.520335	0.565786	0.518574	0.137419	0.0284323	0.0109455
M_24pcw_M1C	0.59732	0.519006	0.271719	0.581166	0.527508	0.569297	0.522746	0.13286	0.0583131	0.0142956
M_24pcw_MFC	0.607491	0.556459	0.334742	0.58357	0.532384	0.562218	0.514056	0.140152	0.0331532	0.0188724
M_24pcw_CBC	0.589201	0.516527	0.118724	0.563984	0.532401	0.551378	0.511135	0.147388	0.030968	0.0141106
M_24pcw_V1C	0.602838	0.541685	0.308918	0.585882	0.535649	0.579805	0.528692	0.18235	0.00769374	0.0207527
F_25pcw_A1C	0.577032	0.503806	0.155367	0.564751	0.535263	0.576525	0.534283	0.159113	0.031658	0.0104376
F_26pcw_STC	0.586804	0.512566	0.279824	0.570668	0.490046	0.555677	0.508315	0.159057	0.0556056	0.0274787
F_26pcw_V1C	0.571438	0.506333	0.162893	0.575735	0.543869	0.576063	0.535162	0.14487	0.0207241	0.0232907
F_26pcw_DFC	0.565961	0.494106	0.138291	0.559305	0.530661	0.56941	0.532285	0.0897769	0.00514398	0.0110237
F_35pcw_CBC	0.565568	0.530936	0.191661	0.527601	0.511515	0.552679	0.51555	0.125856	0.0231164	0.0124539
F_35pcw_VFC	0.584741	0.540066	0.248037	0.564004	0.493494	0.586644	0.546512	0.135471	0.0172523	0.0146797
M_37pcw_A1C	0.589531	0.528028	0.229099	0.574561	0.568241	0.577844	0.532042	0.159857	0.0415689	0.0121765
M_37pcw_OFC	0.586816	0.536931	0.137774	0.571105	0.559073	0.578976	0.534046	0.170486	0.0468353	0.00546779
M_37pcw_AMY	0.563607	0.523735	0.11345	0.558623	0.512996	0.572203	0.533426	0.163512	0.0381253	0.0201611
M_37pcw_V1C	0.584962	0.526927	0.176506	0.578086	0.539135	0.574078	0.535303	0.143629	0.0401597	0.0135285
M_37pcw_MFC	0.585793	0.535597	0.236666	0.57148	0.530149	0.58725	0.539552	0.14776	0.0479381	0.0116098
M_37pcw_MD	0.548377	0.499227	0.0959484	0.563357	0.505408	0.558915	0.519343	0.126918	0.0589455	0.0133582
M_37pcw_CBC	0.574017	0.521601	0.208086	0.568355	0.528437	0.56796	0.526946	0.156721	0.0749123	0.0157901
M_37pcw_STR	0.564385	0.526098	0.109567	0.552015	0.516315	0.581116	0.538535	0.131743	0.0611328	0.0134502
M_37pcw_IPC	0.591263	0.527125	0.26607	0.572206	0.549531	0.581136	0.534634	0.166527	0.0401667	0.0101016
M_37pcw_ITC	0.59136	0.546006	0.286183	0.570409	0.549585	0.57909	0.5392	0.153441	0.0388415	0.0117426
M_37pcw_S1C	0.581644	0.528338	0.208857	0.582562	0.53231	0.5869	0.535627	0.154783	0.0374289	0.00621556
M_37pcw_DFC	0.589125	0.538866	0.154662	0.575651	0.544049	0.582889	0.540449	0.175892	0.056686	0.013865
M_37pcw_STC	0.587387	0.533876	0.239705	0.579716	0.548314	0.586912	0.537738	0.168694	0.0519634	0.0101064
M_37pcw_M1C	0.579629	0.529541	0.196293	0.567136	0.521416	0.583076	0.540147	0.140886	0.0500232	0.0110416
M_37pcw_VFC	0.585277	0.536668	0.150069	0.568121	0.53647	0.58086	0.539774	0.188188	0.0509444	0.0106454
M_37pcw_HIP	0.560109	0.535697	0.118907	0.543714	0.474657	0.57801	0.542139	0.142803	0.0532214	0.0186644
M_4mos_STC	0.582472	0.509742	0.188254	0.584652	0.600202	0.554891	0.511866	0.152363	0.0672914	0.0159997
M_4mos_STR	0.57554	0.502889	0.0992209	0.57106	0.603665	0.574888	0.53568	0.142362	0.0693516	0.0148352
M_4mos_V1C	0.604824	0.531871	0.262484	0.603818	0.625573	0.57604	0.531117	0.138805	0.037578	0.0139971
M_4mos_CBC	0.573638	0.499692	0.145338	0.579171	0.514591	0.556233	0.515793	0.120767	0.0576593	0.0203877
M_4mos_HIP	0.591843	0.518831	0.217135	0.588047	0.605391	0.570975	0.531587	0.161339	0.0429305	0.0251522
M_4mos_MD	0.580972	0.502213	0.249657	0.59358	0.569499	0.550862	0.514681	0.175503	0.0700891	0.0189579
M_4mos_ITC	0.578301	0.481354	0.126507	0.588591	0.570702	0.540738	0.508271	0.141541	0.0628645	0.0152912
M_4mos_AMY	0.589112	0.521833	0.117699	0.583165	0.59495	0.572799	0.54255	0.126052	0.0581077	0.0115982
M_4mos_MFC	0.583314	0.504755	0.111301	0.58604	0.59999	0.557914	0.522222	0.139391	0.0398356	0.0171473
M_4mos_M1C	0.583139	0.519488	0.207874	0.58643	0.541303	0.579592	0.540895	0.139275	0.0231737	0.0163792
M_4mos_DFC	0.565397	0.513174	0.204482	0.58099	0.528086	0.55523	0.528324	0.112317	0.01936	0.0274974
M_4mos_OFC	0.583184	0.527062	0.232141	0.585757	0.520725	0.575192	0.540674	0.15242	0.0480243	0.019428
M_4mos_A1C	0.564604	0.509348	0.233447	0.572441	0.511244	0.559347	0.530773	0.168979	0.0345023	0.017787
M_4mos_STC.1	0.566722	0.498642	0.207243	0.587064	0.536404	0.564593	0.536727	0.136107	0.0398303	0.0236171
M_4mos_VFC	0.577381	0.527566	0.142944	0.591458	0.523437	0.567354	0.53922	0.111397	0.0319924	0.0164735
M_4mos_ITC.1	0.568892	0.501272	0.14329	0.589739	0.508424	0.560357	0.53273	0.136394	0.0129144	0.0159828
M_4mos_AMY.1	0.576842	0.528147	0.208791	0.57183	0.514076	0.564684	0.53301	0.113644	0.040501	0.0268294
M_4mos_M1C.1	0.585622	0.511773	0.23573	0.599598	0.614022	0.578573	0.538485	0.12436	0.043994	0.0197442
M_4mos_MD.1	0.582634	0.50887	0.178941	0.60234	0.583098	0.562853	0.522884	0.135927	0.0563312	0.0163893
M_4mos_OFC.1	0.581393	0.509763	0.232831	0.594209	0.57974	0.56841	0.524113	0.130402	0.0447414	0.0103061
M_4mos_STR.1	0.578932	0.503591	0.174727	0.577394	0.570164	0.568203	0.538682	0.11844	0.0856453	0.0116336
M_4mos_STC.2	0.586566	0.50415	0.252454	0.599294	0.543313	0.568358	0.530182	0.103789	0.0327097	0.0160841
M_4mos_A1C.1	0.593602	0.51539	0.22686	0.599223	0.578205	0.577659	0.53767	0.1348	0.0554312	0.0212162
M_4mos_HIP.1	0.581655	0.495618	0.156001	0.580307	0.536056	0.562836	0.534337	0.11951	0.0625001	0.0162376
M_4mos_AMY.2	0.596311	0.516999	0.235136	0.592351	0.56641	0.57681	0.53692	0.137336	0.0732191	0.0151471
M_4mos_MFC.1	0.58915	0.512303	0.139671	0.603583	0.571149	0.581067	0.53699	0.123655	0.0595604	0.013926
M_4mos_V1C.1	0.605049	0.520195	0.161192	0.607844	0.592446	0.586785	0.540434	0.152423	0.0460045	0.0201287
M_4mos_ITC.2	0.592862	0.50539	0.102416	0.591776	0.586159	0.577641	0.533787	0.123442	0.0455315	0.01122
M_4mos_S1C	0.590142	0.506618	0.149286	0.590703	0.606553	0.583666	0.534535	0.152519	0.0453084	0.011214
M_4mos_IPC	0.593207	0.513839	0.24723	0.594953	0.604103	0.573396	0.534175	0.13456	0.0418514	0.00952136
M_4mos_CBC.1	0.588828	0.527742	0.132851	0.58022	0.528849	0.571407	0.531107	0.150679	0.0543381	0.0202636
M_4mos_DFC.1	0.591051	0.513893	0.247081	0.594477	0.576403	0.576156	0.533906	0.102274	0.0497731	0.0150673
M_4mos_VFC.1	0.594231	0.521077	0.132681	0.595781	0.569939	0.572991	0.531714	0.143966	0.0455942	0.0157733
M_10mos_S1C	0.581633	0.518172	0.0856378	0.599115	0.610471	0.563012	0.522641	0.136724	0.0301123	0.0175918
M_10mos_IPC	0.57748	0.51766	0.0494461	0.583624	0.592417	0.568987	0.526482	0.118872	0.0580023	0.0138132
M_10mos_STC	0.582006	0.513966	0.198029	0.590608	0.603264	0.571113	0.531091	0.154509	0.0919478	0.0203406
M_10mos_DFC	0.579755	0.514389	0.129163	0.599157	0.592819	0.562327	0.522985	0.147538	0.0395385	0.0144818
M_10mos_OFC	0.583672	0.511141	0.175164	0.587925	0.595822	0.571254	0.526023	0.178506	0.0704647	0.0239129
M_10mos_MFC	0.589105	0.533085	0.210112	0.584866	0.600659	0.579203	0.537426	0.148189	0.0818036	0.0197535
M_10mos_CBC	0.583708	0.533511	0.150741	0.55713	0.472907	0.578038	0.519873	0.15493	0.0745466	0.0306215
M_10mos_ITC	0.575989	0.506087	0.244926	0.590125	0.592211	0.572281	0.527088	0.170692	0.0510339	0.0161736
M_10mos_MD	0.560671	0.497581	0.0706769	0.579894	0.559254	0.551121	0.51666	0.14619	0.0479528	0.0249069
M_10mos_V1C	0.586323	0.518811	0.148275	0.595128	0.606808	0.575883	0.531026	0.178864	0.105343	0.0150837
F_1yrs_AMY	0.596402	0.517888	0.153018	0.590941	0.608778	0.58167	0.53856	0.0961157	0.0557788	0.0204821
F_1yrs_M1C	0.598198	0.527623	-0.0576228	0.571987	0.602855	0.570395	0.52622	0.157218	0.0353615	0.00449495
F_1yrs_DFC	0.603557	0.531301	0.0609252	0.597131	0.631683	0.578432	0.533577	0.140433	0.0575435	0.0135064
F_1yrs_STC	0.605123	0.53041	0.0813522	0.598872	0.626942	0.573313	0.526939	0.143334	0.0526403	0.016724
F_1yrs_V1C	0.607824	0.535104	0.113276	0.609174	0.626463	0.568418	0.527434	0.135075	0.0719634	0.0141197
F_1yrs_MFC	0.599343	0.516547	0.06097	0.59903	0.626154	0.570602	0.53343	0.15242	0.0617119	0.0176141
F_1yrs_OFC	0.598805	0.531253	0.185896	0.606841	0.628631	0.570126	0.537413	0.123827	0.0753237	0.0158371
F_1yrs_ITC	0.60367	0.520742	0.0277281	0.597344	0.604626	0.571628	0.531488	0.142497	0.0761864	0.00915301
F_1yrs_S1C	0.605519	0.527535	0.0920722	0.60137	0.643852	0.574497	0.52938	0.115777	0.0645913	0.0166064
F_1yrs_VFC	0.603456	0.521857	0.198974	0.597858	0.630951	0.571477	0.526406	0.132006	0.0466348	0.01399
F_1yrs_CBC	0.586998	0.51807	0.0561345	0.589143	0.536248	0.569962	0.519111	0.162885	0.0481545	0.0219241
F_1yrs_A1C	0.600843	0.519373	0.100129	0.600735	0.627238	0.572364	0.526901	0.162483	0.0636133	0.0183033
F_1yrs_MD	0.584133	0.504786	0.110574	0.608106	0.554095	0.556357	0.520175	0.158697	0.0488358	0.0306978
F_1yrs_HIP	0.595248	0.514853	0.00712777	0.591181	0.614563	0.561222	0.530056	0.132576	0.0637639	0.0221188
F_1yrs_IPC	0.600164	0.524478	0.0999411	0.607667	0.641208	0.570533	0.530668	0.174041	0.0440552	0.0166044
F_1yrs_STR	0.590886	0.507064	0.0538602	0.576993	0.604489	0.574013	0.529723	0.164566	0.0795104	0.0191795
F_2yrs_VFC	0.560836	0.495562	0.167238	0.558432	0.506137	0.56944	0.537625	0.10993	0.0159663	0.0145736
F_2yrs_IPC	0.564584	0.491885	0.192608	0.555301	0.508456	0.558289	0.526167	0.113452	0.0270508	0.0119728
F_2yrs_S1C	0.559328	0.490466	0.188693	0.54854	0.513281	0.57265	0.532933	0.0690508	0.0376834	0.0144301
F_2yrs_ITC	0.561674	0.484878	0.185642	0.530654	0.511668	0.571267	0.52428	0.0809212	0.0355389	0.0192024
F_2yrs_MD	0.554946	0.482023	0.25726	0.546073	0.489481	0.553844	0.517844	0.104288	0.028713	0.0116073
F_2yrs_DFC	0.558684	0.496337	0.169868	0.564482	0.509757	0.573657	0.534422	0.0989825	-0.0287138	0.0101917
F_2yrs_MFC	0.558085	0.482182	0.199897	0.549125	0.531598	0.561248	0.524968	0.1315	-0.0115077	0.0201206
F_2yrs_CBC	0.566699	0.487054	0.129896	0.55203	0.493464	0.563454	0.524796	0.112109	0.0425899	0.0103195
F_2yrs_HIP	0.547936	0.487328	0.186266	0.535248	0.46953	0.559469	0.525041	0.114733	0.0433923	0.014478
F_2yrs_OFC	0.567501	0.494883	0.322605	0.554566	0.511517	0.570109	0.527715	0.174686	0.00454015	0.0137722
F_2yrs_V1C	0.569615	0.501146	0.272508	0.558633	0.531498	0.575215	0.53377	0.110797	-0.00408389	0.0124808
F_2yrs_STC	0.56198	0.488654	0.161249	0.546215	0.509174	0.57363	0.523057	0.105569	0.00434431	0.0249617
F_3yrs_STR	0.556309	0.493146	0.136004	0.561114	0.538681	0.562035	0.535487	0.121006	0.072563	0.0159171
F_3yrs_STC	0.575194	0.518017	0.179162	0.587494	0.57725	0.567893	0.540342	0.119667	0.0401714	0.0183688
F_3yrs_IPC	0.569424	0.490922	0.0733756	0.585257	0.584449	0.557888	0.525424	0.119747	0.0481327	0.0100099
F_3yrs_ITC	0.570044	0.50002	0.231218	0.585065	0.547441	0.561438	0.532712	0.108994	0.0042918	0.0102391
F_3yrs_CBC	0.577558	0.524588	0.164444	0.575862	0.449488	0.571194	0.517888	0.145233	0.0600655	0.0306813
F_3yrs_AMY	0.560409	0.494333	0.20941	0.565562	0.516429	0.560804	0.528544	0.134517	0.0439485	0.0112356
F_3yrs_VFC	0.565781	0.495306	0.143724	0.571738	0.575705	0.549264	0.520372	0.132546	0.0357705	0.0147364
F_3yrs_M1C	0.573365	0.496706	0.136016	0.598105	0.572227	0.563307	0.526161	0.134039	0.0417584	0.0211431
F_3yrs_A1C	0.571095	0.505771	0.139892	0.594035	0.580332	0.568822	0.539829	0.122586	0.054936	0.0141222
F_3yrs_MD	0.565723	0.502591	0.201723	0.584832	0.528834	0.573054	0.544235	0.114776	0.0650842	0.0267988
F_3yrs_V1C	0.574357	0.512405	0.151942	0.597754	0.588651	0.565235	0.532047	0.114447	0.0640127	0.0082572
M_3yrs_OFC	0.576467	0.508426	0.151085	0.580256	0.566337	0.573744	0.539737	0.0753686	0.0282447	0.0120504
M_3yrs_MFC	0.571953	0.504912	0.233351	0.564414	0.521555	0.574986	0.530748	0.103677	0.0494748	0.0234219
M_3yrs_M1C	0.565716	0.496652	0.12986	0.57813	0.537531	0.580428	0.53439	0.140564	0.00903859	0.00489238
M_3yrs_S1C	0.572854	0.518735	0.146252	0.575126	0.531061	0.583265	0.541456	0.158138	0.0311785	0.0212115
M_3yrs_STC	0.570535	0.497113	0.117792	0.571411	0.536476	0.570038	0.532188	0.1454	0.0193628	0.0060216
M_3yrs_IPC	0.574193	0.526965	0.145326	0.569535	0.546046	0.57882	0.534076	0.143514	0.034591	0.0187054
M_3yrs_A1C	0.57061	0.501213	0.145042	0.577994	0.530914	0.572351	0.537154	0.124137	0.00802466	0.0172396
M_3yrs_CBC	0.583098	0.51516	0.205785	0.583557	0.507652	0.567117	0.518185	0.160101	0.0463587	0.0338166
M_3yrs_V1C	0.571407	0.506187	0.162113	0.575605	0.543866	0.576001	0.535759	0.144884	0.0207239	0.0232828
M_3yrs_AMY	0.565982	0.494086	0.138303	0.559314	0.530662	0.569389	0.532275	0.0898328	0.000525492	0.0110915
M_3yrs_VFC	0.576102	0.519437	0.170663	0.574941	0.532669	0.584837	0.547375	0.102527	0.0258588	0.0170268
M_3yrs_DFC	0.577385	0.511912	0.240817	0.565597	0.565569	0.580423	0.542866	0.152608	0.0274173	0.0124447
M_3yrs_HIP	0.566399	0.494348	0.130828	0.558671	0.495154	0.557997	0.522759	0.0821741	0.0123275	0.0283054
M_3yrs_ITC	0.577032	0.503799	0.155376	0.56476	0.535268	0.576664	0.534345	0.159143	0.0316917	0.01051
M_4yrs_AMY	0.561637	0.492188	0.0775298	0.588846	0.568975	0.560623	0.53099	0.11739	0.0426716	0.00839882
M_4yrs_STR	0.553069	0.483412	0.0768364	0.578225	0.600145	0.558453	0.530666	0.117186	0.0797749	0.0105183
M_4yrs_VFC	0.558844	0.483484	0.0618098	0.563698	0.593052	0.553331	0.523078	0.115353	0.0330455	0.0121278
M_4yrs_DFC	0.5512	0.476454	0.173867	0.55806	0.571686	0.555968	0.52723	0.132435	0.0428429	0.0189908
M_4yrs_STC	0.558997	0.468495	0.0481968	0.562002	0.573495	0.551369	0.520135	0.146106	0.0545398	0.0152084
M_4yrs_CBC	0.549287	0.486617	0.0665975	0.575688	0.494898	0.555198	0.512182	0.145743	0.0430402	0.0156612
M_4yrs_MD	0.560507	0.482231	0.197695	0.578125	0.569987	0.541382	0.518468	0.136437	0.0432663	0.0137843
M_8yrs_ITC	0.557242	0.464647	0.183944	0.577125	0.571777	0.543863	0.512242	0.170749	0.0566119	0.00892429
M_8yrs_S1C	0.559533	0.478437	0.193827	0.585633	0.591246	0.554131	0.519735	0.154068	0.0482877	0.00593718
M_8yrs_IPC	0.557622	0.494463	0.0971857	0.602597	0.588033	0.553661	0.522239	0.123022	0.0586436	0.0168794
M_8yrs_V1C	0.564681	0.488124	0.225796	0.597557	0.5905	0.559116	0.521825	0.137807	0.0635856	0.0122374
M_8yrs_STC	0.556221	0.467254	0.172319	0.566059	0.592091	0.547256	0.516579	0.126672	0.0375284	-0.00129113
M_8yrs_MD	0.567877	0.488753	0.138691	0.5981	0.556629	0.545194	0.514185	0.118703	0.0658934	0.0154517
M_8yrs_VFC	0.558453	0.472367	0.167304	0.582219	0.601556	0.556142	0.523289	0.133074	0.0259206	0.0115504
M_8yrs_HIP	0.573383	0.491194	0.158676	0.592845	0.589486	0.558935	0.536029	0.122123	0.0685058	0.0146183
M_8yrs_AMY	0.57016	0.479303	0.199861	0.59204	0.549293	0.557521	0.522236	0.116734	0.0624953	0.0194613
M_8yrs_M1C	0.557653	0.475443	0.0665826	0.5831	0.587835	0.554045	0.519485	0.128247	0.0622751	0.0126138
M_8yrs_CBC	0.565034	0.520178	0.0911129	0.580773	0.526092	0.570777	0.520994	0.145784	0.0321956	0.0222339
M_8yrs_DFC	0.56927	0.497053	0.139615	0.586053	0.589787	0.559475	0.526809	0.112113	0.0563068	0.0126229
M_8yrs_STR	0.548167	0.48808	0.176951	0.581456	0.600807	0.553783	0.521196	0.14065	0.0402776	0.0172058
M_8yrs_A1C	0.56197	0.494359	0.0794484	0.592364	0.598514	0.556376	0.525709	0.145496	0.0467097	0.0159063
M_8yrs_MFC	0.560386	0.487081	0.165935	0.581298	0.583573	0.556496	0.517807	0.126414	0.0650418	0.0177691
M_8yrs_OFC	0.575966	0.489159	0.0932856	0.591867	0.61501	0.568325	0.52743	0.159518	0.0821322	0.00693361
M_8yrs_MFC.1	0.545163	0.475422	-0.00246558	0.553901	0.586262	0.516332	0.48884	0.145116	-0.0302291	0.0223726
M_8yrs_CBC.1	0.59615	0.51705	0.141981	0.586806	0.513279	0.587266	0.529353	0.136858	0.0616139	0.0305792
M_8yrs_A1C.1	0.592663	0.513536	0.172265	0.603543	0.619319	0.578984	0.537203	0.131031	0.0427042	0.0165923
M_8yrs_VFC.1	0.581708	0.493383	0.0584058	0.584808	0.640897	0.554694	0.521388	0.138027	0.0640844	0.0239052
M_8yrs_HIP.1	0.576029	0.492079	0.183054	0.603434	0.61066	0.551825	0.519222	0.120279	0.0816035	0.0222752
M_8yrs_AMY.1	0.582893	0.49129	0.00828136	0.592422	0.617711	0.562316	0.518124	0.125199	0.0251737	0.0118934
M_8yrs_V1C.1	0.593254	0.506139	0.098674	0.601141	0.625839	0.568898	0.522229	0.15873	0.0570633	0.0262648
M_8yrs_IPC.1	0.586117	0.489156	0.0561644	0.583978	0.603222	0.55187	0.515216	0.108011	0.0203987	0.018741
M_8yrs_DFC.1	0.572147	0.490535	-0.0213415	0.546857	0.572393	0.539693	0.496214	0.113318	0.0298186	0.0219739
M_8yrs_STC.1	0.590975	0.508446	0.143927	0.602733	0.644325	0.565681	0.524136	0.14617	0.0663678	0.0123682
M_8yrs_ITC.1	0.578293	0.485788	0.177064	0.585118	0.594906	0.54447	0.509695	0.150283	0.0386806	0.0192774
F_11yrs_VFC	0.588631	0.491673	0.240398	0.605641	0.625206	0.562234	0.526126	0.13841	0.0381374	0.025482
F_11yrs_IPC	0.584297	0.498195	0.0487318	0.578945	0.646916	0.552496	0.518186	0.137301	0.059391	0.0107973
F_11yrs_ITC	0.558204	0.461266	0.079302	0.593305	0.609052	0.534712	0.501504	0.133481	0.0241443	0.0110971
F_11yrs_STC	0.573025	0.491663	0.181308	0.589489	0.599532	0.553518	0.516982	0.147089	0.0434693	0.00751721
F_11yrs_S1C	0.579231	0.482646	0.208101	0.602914	0.641445	0.555438	0.523515	0.133801	0.0612353	0.0214766
F_11yrs_DFC	0.589379	0.50414	0.121363	0.585913	0.638163	0.567619	0.529909	0.144156	0.0865328	0.0155289
F_11yrs_AMY	0.585092	0.494002	0.114953	0.585461	0.607301	0.557973	0.525013	0.12383	0.0896769	0.0271564
F_11yrs_V1C	0.593924	0.510834	0.142316	0.613858	0.626465	0.578779	0.533894	0.133196	0.0711534	0.0159109
F_11yrs_CBC	0.582538	0.502448	0.13902	0.592612	0.467312	0.553337	0.508464	0.153275	0.0660852	0.0373258
F_11yrs_A1C	0.591985	0.494484	0.111217	0.594103	0.639091	0.558656	0.521217	0.162454	0.0493548	0.0196468
F_11yrs_HIP	0.556363	0.467924	0.167229	0.588977	0.571022	0.531978	0.506431	0.125289	0.0466566	0.00530636
F_11yrs_M1C	0.584699	0.504694	0.237721	0.60727	0.636292	0.563859	0.528597	0.12179	0.0319739	0.0100144
F_11yrs_OFC	0.584424	0.48625	0.123871	0.603621	0.634927	0.557776	0.522245	0.14503	0.078791	0.0151717
F_11yrs_MFC	0.58519	0.493507	0.129692	0.598484	0.64203	0.5558	0.523907	0.162721	0.0753243	0.0156603
F_13yrs_MFC	0.58584	0.508282	0.0781155	0.591112	0.625084	0.569993	0.537032	0.137484	0.06015	0.0283262
F_13yrs_IPC	0.590767	0.512599	0.195946	0.590489	0.622366	0.58308	0.541078	0.135621	0.0714163	0.0293793
F_13yrs_VFC	0.582146	0.50725	0.0889402	0.596783	0.645787	0.575477	0.538017	0.137664	0.0576938	0.0237279
F_13yrs_A1C	0.591863	0.506398	0.168487	0.59615	0.625732	0.573761	0.534005	0.134391	0.0535958	0.0239219
F_13yrs_ITC	0.58876	0.514754	0.165301	0.587656	0.623247	0.577798	0.540374	0.113578	0.0443253	0.0243494
F_13yrs_STC	0.584843	0.510193	0.0936502	0.593287	0.627902	0.578063	0.542545	0.102357	0.0753967	0.0190703
F_13yrs_CBC	0.581993	0.519609	0.136315	0.580046	0.513582	0.57656	0.521828	0.143704	0.0550528	0.0227892
F_13yrs_V1C	0.585077	0.520341	0.0941313	0.593838	0.59986	0.581818	0.539996	0.0964836	0.0573612	0.0247079
F_13yrs_S1C	0.587439	0.506978	0.0215118	0.583002	0.632599	0.57107	0.537637	0.129149	0.047354	0.0185365
F_13yrs_DFC	0.594647	0.509276	0.191242	0.592837	0.636035	0.580724	0.542123	0.114195	0.0667523	0.015305
F_13yrs_OFC	0.592401	0.518254	0.0823683	0.591435	0.63147	0.579767	0.542011	0.121852	0.0654289	0.0172391
F_13yrs_MD	0.56602	0.514887	0.0598105	0.558731	0.530619	0.572147	0.539105	0.131342	0.0448839	0.0218343
F_13yrs_AMY	0.579422	0.507953	-0.0017543	0.585	0.594881	0.575232	0.538581	0.115673	0.0598568	0.0188958
F_13yrs_M1C	0.591681	0.502651	0.158691	0.597254	0.635335	0.57594	0.538831	0.11005	0.0498883	0.0236397
F_13yrs_HIP	0.572952	0.499893	0.142334	0.569301	0.569388	0.571101	0.53755	0.123641	0.0298248	0.0228082
F_13yrs_STR	0.570316	0.503707	0.0289534	0.561923	0.577778	0.574588	0.539448	0.115596	0.0734116	0.0171961
M_15yrs_IPC	0.581763	0.488134	0.144623	0.603389	0.652929	0.549715	0.512808	0.106661	0.0307349	0.00713064
M_15yrs_CBC	0.572359	0.495972	0.121492	0.589606	0.531278	0.572205	0.520775	0.166416	0.055248	0.0227765
M_15yrs_STC	0.580189	0.481501	0.139848	0.602195	0.639169	0.548124	0.506554	0.138691	0.055175	0.00746156
M_15yrs_ITC	0.588092	0.502802	0.249771	0.601726	0.63606	0.55937	0.520601	0.139505	0.0634901	0.0174699
M_15yrs_AMY	0.588865	0.486281	0.128694	0.602033	0.618719	0.55305	0.520929	0.123219	0.043019	0.0200038
M_18yrs_HIP	0.567634	0.493882	0.214207	0.566163	0.502503	0.569534	0.533506	0.133909	0.0397363	0.0172635
M_18yrs_M1C	0.566284	0.504782	0.0675569	0.577951	0.562741	0.571296	0.538612	0.0837543	0.0464074	0.0313435
M_18yrs_V1C	0.572581	0.498255	0.148183	0.581222	0.56377	0.578039	0.537837	0.123318	0.061009	0.0135194
M_18yrs_A1C	0.564023	0.497058	0.221756	0.577697	0.527015	0.57174	0.536605	0.110631	-0.00556001	0.0189763
M_18yrs_ITC	0.576149	0.496015	0.226107	0.58862	0.5743	0.580577	0.5351	0.127627	0.0361332	0.0185674
M_18yrs_VFC	0.580521	0.505754	0.16017	0.588746	0.606565	0.578263	0.544651	0.113585	0.0340911	0.017286
M_18yrs_MFC	0.571374	0.501965	0.278049	0.581284	0.533611	0.57279	0.534468	0.111905	0.0236137	0.0306662
M_18yrs_STC	0.566397	0.499739	0.201502	0.578661	0.53489	0.577744	0.53795	0.108416	0.0409501	0.0136379
M_18yrs_DFC	0.581848	0.499351	0.213184	0.602638	0.611807	0.565848	0.536368	0.151591	0.0358806	0.022022
M_18yrs_S1C	0.570083	0.51661	0.134908	0.575091	0.562481	0.584947	0.546756	0.0770386	0.0182485	0.0257774
M_18yrs_IPC	0.57424	0.51484	0.150269	0.58786	0.592607	0.579069	0.546153	0.177691	0.0460102	0.0161941
M_18yrs_OFC	0.575151	0.499254	0.144094	0.598239	0.604827	0.578217	0.545059	0.0981527	0.00433266	0.0146609
M_18yrs_CBC	0.571667	0.521484	0.0848189	0.584739	0.513635	0.582995	0.535139	0.134332	0.0671881	0.0237983
F_19yrs_STC	0.597306	0.527624	0.299202	0.61484	0.639495	0.574763	0.534645	0.127383	0.0617699	0.0159337
F_19yrs_CBC	0.586394	0.527951	0.154145	0.599193	0.524715	0.579286	0.528691	0.118266	0.0573043	0.0281041
F_19yrs_DFC	0.593984	0.516678	0.225515	0.603818	0.647551	0.57644	0.537747	0.142614	0.0758206	0.019683
F_19yrs_AMY	0.587702	0.519895	0.24027	0.595652	0.603479	0.584285	0.548924	0.146541	0.0587008	0.0135203
F_19yrs_OFC	0.594018	0.513455	0.143108	0.600188	0.644177	0.583148	0.540797	0.141901	0.0673191	0.0177227
F_19yrs_ITC	0.589545	0.512042	0.245156	0.599444	0.624985	0.581141	0.542786	0.118468	0.0355709	0.0188813
F_19yrs_STR	0.582683	0.513006	0.0988593	0.593085	0.601755	0.552662	0.523742	0.110345	0.0886657	0.0223382
F_19yrs_S1C	0.592473	0.506344	0.185716	0.616703	0.635528	0.568596	0.533061	0.111581	0.0568205	0.0195243
F_19yrs_M1C	0.589787	0.515226	0.170513	0.601638	0.635734	0.578442	0.541352	0.0863028	0.0692676	0.0284378
F_19yrs_HIP	0.592011	0.537356	0.219317	0.593858	0.620457	0.572817	0.539031	0.129083	0.040804	0.020033
F_19yrs_A1C	0.592588	0.509472	0.271823	0.620737	0.644837	0.563445	0.523628	0.100892	0.0957634	0.0221643
F_19yrs_V1C	0.595278	0.531764	0.18349	0.616683	0.624305	0.582856	0.542813	0.126859	0.0683817	0.0216377
F_19yrs_IPC	0.59575	0.508995	0.156796	0.610966	0.644907	0.57072	0.527191	0.0917404	0.0847054	0.0281816
F_19yrs_VFC	0.596917	0.52038	0.14067	0.58693	0.622321	0.586455	0.547442	0.131493	0.0800781	0.0199505
F_19yrs_MFC	0.591021	0.514468	0.231128	0.60334	0.641255	0.56866	0.529179	0.115613	0.0435964	0.0197863
F_19yrs_MD	0.586852	0.522958	0.179892	0.600717	0.53905	0.56069	0.525732	0.13505	0.0722338	0.0268918
F_21yrs_MFC	0.588914	0.501556	0.134982	0.580021	0.610858	0.56127	0.521587	0.146248	0.0526591	0.0165348
F_21yrs_M1C	0.598711	0.506549	0.154008	0.601381	0.629438	0.566206	0.529363	0.104379	0.0587742	0.0181245
F_21yrs_A1C	0.593539	0.493137	0.22773	0.603168	0.639861	0.565983	0.523125	0.128221	0.0576701	0.0184147
F_21yrs_DFC	0.586155	0.502327	0.0610716	0.596331	0.617651	0.567344	0.522836	0.142973	0.0414226	0.0184531
F_21yrs_AMY	0.585781	0.499942	0.0588452	0.594621	0.641064	0.557941	0.522339	0.159276	0.0565827	0.00901524
F_21yrs_MD	0.58025	0.502471	0.255491	0.601965	0.510991	0.557255	0.516587	0.139695	0.0598788	0.0179796
F_21yrs_V1C	0.594472	0.49836	0.253494	0.614069	0.640767	0.567367	0.525591	0.116407	0.0860554	0.0160106
F_21yrs_STC	0.594114	0.508192	0.145547	0.597864	0.64929	0.570242	0.527499	0.140456	0.0442809	0.0160515
F_21yrs_VFC	0.589314	0.499018	0.0720696	0.59375	0.6414	0.563842	0.515575	0.134864	0.0701329	0.0183409
F_21yrs_CBC	0.58844	0.51625	0.108133	0.591633	0.507831	0.574711	0.516616	0.145562	0.0383874	0.0389247
F_21yrs_S1C	0.598626	0.512566	0.226149	0.603062	0.643595	0.571959	0.524282	0.150318	0.0618893	0.0172618
F_21yrs_ITC	0.588463	0.490077	0.00715765	0.583574	0.637766	0.560449	0.52094	0.15188	0.03877	0.0179745
F_21yrs_IPC	0.596334	0.497048	0.106163	0.599154	0.64585	0.564187	0.523867	0.141244	0.0737732	0.0200335
F_21yrs_HIP	0.580678	0.497133	0.150078	0.58043	0.618245	0.564578	0.525017	0.107598	0.0579773	0.013726
F_21yrs_STR	0.573636	0.498396	0.0760713	0.588764	0.610652	0.573835	0.533153	0.132819	0.0651564	0.0164583
F_21yrs_OFC	0.587558	0.487701	0.102972	0.60329	0.646619	0.559522	0.518556	0.143378	0.0704572	0.0117599
M_23yrs_ITC	0.582431	0.491671	0.159513	0.577188	0.616878	0.564548	0.531458	0.133549	0.0470138	0.0177431
M_23yrs_AMY	0.575554	0.502807	0.10359	0.562411	0.556736	0.56757	0.534733	0.105542	0.0711578	0.0202336
M_23yrs_OFC	0.580934	0.487154	0.080354	0.572267	0.626341	0.567954	0.536067	0.116302	0.0453312	0.0226763
M_23yrs_MD	0.567015	0.507206	0.089768	0.568371	0.516025	0.558837	0.53041	0.137014	0.0677654	0.0241977
M_23yrs_STC	0.587723	0.493691	0.17453	0.57678	0.610187	0.576823	0.532854	0.122622	0.0538714	0.0091472
M_23yrs_VFC	0.585032	0.500751	0.0631278	0.578759	0.626893	0.572987	0.534717	0.118279	0.0370582	0.016929
M_23yrs_MFC	0.583239	0.487152	0.0407224	0.58127	0.62776	0.566611	0.52866	0.154679	0.0507301	0.0205287
M_23yrs_M1C	0.584207	0.496407	0.0914984	0.572522	0.629634	0.574092	0.534197	0.152792	0.0655705	0.0195557
M_23yrs_HIP	0.57845	0.505716	0.049978	0.585172	0.590481	0.566983	0.534763	0.0971463	0.0522689	0.0253177
M_23yrs_CBC	0.577686	0.503016	0.0606861	0.572705	0.510911	0.581584	0.527624	0.147946	0.0753774	0.020692
M_23yrs_S1C	0.574699	0.483025	0.0935695	0.578051	0.633016	0.568674	0.529823	0.103508	0.0596904	0.0237848
M_23yrs_A1C	0.582068	0.490502	-0.00275846	0.570049	0.609106	0.572166	0.529558	0.131003	0.0386084	0.019512
M_23yrs_IPC	0.5868	0.504374	0.114071	0.581073	0.620991	0.568295	0.53375	0.136411	0.0665645	0.022391
M_23yrs_STR	0.563461	0.494328	-0.0354655	0.557636	0.560045	0.563985	0.537085	0.108411	0.0440846	0.02368
F_30yrs_ITC	0.5838	0.513195	0.0108456	0.584135	0.635084	0.580258	0.543695	0.116276	0.0494617	0.0155853
F_30yrs_STR	0.568568	0.512496	0.158547	0.589202	0.608776	0.584035	0.5452	0.103216	0.0626625	0.0202616
F_30yrs_MFC	0.589624	0.518506	0.0433912	0.592292	0.64087	0.583363	0.541512	0.10799	0.0657401	0.0169914
F_30yrs_OFC	0.588421	0.514458	0.11099	0.594924	0.633662	0.586558	0.548787	0.133425	0.0404712	0.0170697
F_30yrs_IPC	0.595488	0.519777	0.108994	0.587032	0.637316	0.58646	0.545765	0.136386	0.0637728	0.0257123
F_30yrs_STC	0.588463	0.518016	0.0621416	0.598891	0.636246	0.579887	0.536573	0.134427	0.0684698	0.0163205
F_30yrs_S1C	0.590508	0.521593	0.0477964	0.596038	0.632522	0.587365	0.542075	0.148459	0.0915296	0.0187996
F_30yrs_MD	0.57375	0.504851	0.164166	0.609663	0.55282	0.560419	0.534576	0.126626	0.0305586	0.0309553
F_30yrs_HIP	0.584871	0.518479	0.103028	0.600227	0.596245	0.582782	0.547427	0.116751	0.0658762	0.0267052
F_30yrs_A1C	0.580907	0.51974	0.136363	0.591407	0.613097	0.590202	0.551319	0.126488	0.0592455	0.0211122
F_30yrs_V1C	0.592588	0.527463	0.144928	0.609958	0.614517	0.587754	0.547322	0.165346	0.0819651	0.0191472
F_30yrs_DFC	0.584467	0.505306	0.121014	0.592576	0.648419	0.577081	0.535527	0.149745	0.070919	0.0181933
F_30yrs_AMY	0.577868	0.502198	0.0812505	0.603083	0.601127	0.572026	0.537158	0.136114	0.0680551	0.0181478
F_30yrs_M1C	0.589455	0.512408	0.131991	0.60977	0.63243	0.580836	0.543322	0.136304	0.0721726	0.0185531
F_30yrs_VFC	0.584475	0.522589	0.0411438	0.580302	0.617141	0.593999	0.548884	0.13486	0.0496582	0.0179053
F_30yrs_CBC	0.574734	0.50642	0.0399364	0.586424	0.496788	0.577883	0.529517	0.125916	0.0502061	0.0345998
M_36yrs_M1C	0.59469	0.520573	0.27347	0.608981	0.636861	0.580652	0.545776	0.172739	0.0697414	0.0202727
M_36yrs_STC	0.592122	0.516145	0.207225	0.610907	0.651519	0.57555	0.53785	0.151768	0.0573799	0.0165581
M_36yrs_MFC	0.59181	0.508597	0.255108	0.613695	0.628439	0.574815	0.53719	0.142335	0.0642506	0.0209668
M_36yrs_ITC	0.585987	0.498423	0.11165	0.602523	0.628081	0.567009	0.531409	0.123197	0.0684635	0.00593685
M_36yrs_IPC	0.597304	0.514628	0.228767	0.60746	0.632775	0.57673	0.53763	0.120159	0.0487018	0.0199943
M_36yrs_AMY	0.592256	0.514719	0.0998963	0.592655	0.600627	0.579995	0.540067	0.113779	0.0448758	0.0251376
M_36yrs_OFC	0.599698	0.516967	0.279378	0.616887	0.647283	0.566731	0.535161	0.145772	0.0845577	0.0229078
M_36yrs_VFC	0.598052	0.510316	0.224138	0.614553	0.631126	0.568069	0.532198	0.144687	0.0557938	0.0236668
M_36yrs_DFC	0.597305	0.504672	0.116196	0.616402	0.657765	0.562374	0.528407	0.140731	0.0619721	0.0183945
M_36yrs_A1C	0.598171	0.511934	0.143165	0.616502	0.628955	0.567625	0.531925	0.142378	0.0598572	0.0205972
M_36yrs_V1C	0.597464	0.512534	0.236495	0.625304	0.641272	0.57149	0.533613	0.127571	0.0545265	0.0242133
M_36yrs_CBC	0.581982	0.517812	0.12945	0.600103	0.520653	0.572817	0.52792	0.153155	0.0634253	0.0309103
M_36yrs_S1C	0.597779	0.52214	0.153529	0.622972	0.636362	0.569541	0.536064	0.169807	0.0551866	0.0204317
M_36yrs_HIP	0.585978	0.513954	0.0766989	0.605609	0.607772	0.567879	0.534815	0.120904	0.0476756	0.0210801
M_36yrs_STR	0.575428	0.50251	0.089774	0.594022	0.615402	0.576926	0.538318	0.131397	0.0834811	0.00927055
M_36yrs_MD	0.580023	0.525729	0.195746	0.602186	0.540477	0.551615	0.52683	0.123326	0.0551066	0.0201995
M_37yrs_S1C	0.59658	0.527831	0.154357	0.60226	0.625367	0.577449	0.547538	0.136692	0.093812	0.0258712
M_37yrs_V1C	0.59201	0.506766	0.229036	0.603369	0.602579	0.579234	0.537041	0.146964	0.0866988	0.028096
M_37yrs_CBC	0.557716	0.488771	0.0764061	0.574317	0.520309	0.56518	0.520665	0.130652	0.066063	0.0205479
M_37yrs_HIP	0.591289	0.506568	0.193992	0.593083	0.615971	0.559724	0.529093	0.138969	0.0896328	0.028337
M_37yrs_IPC	0.584285	0.499743	0.197333	0.602394	0.634789	0.570112	0.535238	0.151106	0.0685458	0.0193376
M_37yrs_MD	0.589382	0.515567	0.261477	0.597285	0.546033	0.552193	0.527245	0.157507	0.0795646	0.0226268
M_37yrs_DFC	0.596711	0.514867	0.111477	0.597858	0.629993	0.558425	0.522703	0.100874	0.0622336	0.0304729
M_37yrs_VFC	0.598269	0.516407	0.19594	0.609893	0.633688	0.574101	0.538811	0.0883646	0.0669439	0.0199732
M_37yrs_ITC	0.58257	0.49752	0.198779	0.592979	0.629231	0.55488	0.523477	0.11776	0.0714716	0.0241557
M_37yrs_A1C	0.595529	0.512283	0.201239	0.597858	0.639011	0.568211	0.532664	0.135089	0.0883655	0.0199475
M_37yrs_M1C	0.599552	0.520848	0.202796	0.603886	0.632434	0.574966	0.537093	0.116544	0.0947855	0.0235986
M_37yrs_OFC	0.600499	0.527019	0.201332	0.596327	0.631965	0.577558	0.542217	0.138846	0.0888573	0.0203457
M_37yrs_STR	0.573282	0.513179	0.0809786	0.580963	0.584667	0.568025	0.537401	0.130344	0.070934	0.0282204
M_37yrs_STC	0.598172	0.534978	0.147203	0.594964	0.63439	0.582596	0.543568	0.148968	0.0749896	0.0185565
M_37yrs_AMY	0.586297	0.50433	0.0578619	0.591406	0.600238	0.569124	0.53654	0.166441	0.048694	0.0259322
M_37yrs_MFC	0.588254	0.486744	0.206051	0.594213	0.631471	0.536293	0.499805	0.130253	0.0713776	0.0303905
F_40yrs_DFC	0.564998	0.478458	0.234427	0.581023	0.626808	0.56724	0.520891	0.135672	0.0579382	0.0222445
F_40yrs_ITC	0.575889	0.496975	0.138643	0.590434	0.620815	0.556735	0.520681	0.12769	0.0668711	0.0167763
F_40yrs_VFC	0.586118	0.490136	0.248064	0.601697	0.641955	0.565942	0.520094	0.151095	0.0693485	0.0224981
F_40yrs_MD	0.565325	0.486128	0.216819	0.572018	0.53479	0.553752	0.519058	0.10332	0.0903247	0.00977793
F_40yrs_AMY	0.56213	0.477459	0.182396	0.577792	0.596602	0.560307	0.522961	0.156932	0.0766334	0.0076595
F_40yrs_A1C	0.566083	0.493347	0.153452	0.574332	0.603654	0.57933	0.532838	0.160614	0.05317	0.0152263
F_40yrs_CBC	0.550034	0.490934	0.0575571	0.58095	0.462066	0.560726	0.51656	0.150786	0.0203257	0.0159713
F_40yrs_V1C	0.584197	0.505537	0.176873	0.606325	0.613911	0.574543	0.530614	0.126708	0.0901566	0.0204373
F_40yrs_OFC	0.586695	0.493289	0.254349	0.59945	0.629648	0.563449	0.518779	0.171799	0.0754943	0.0144152
F_40yrs_STC	0.586591	0.493048	0.255814	0.606546	0.636652	0.566324	0.524335	0.146211	0.0607835	0.0196665
F_40yrs_IPC	0.590166	0.498712	0.258378	0.601717	0.648196	0.570896	0.520519	0.130899	0.0847622	0.0209283
F_40yrs_M1C	0.556895	0.48161	0.261904	0.580836	0.609935	0.573087	0.528778	0.123813	0.0647884	0.0100612
F_40yrs_HIP	0.56064	0.468832	0.191505	0.564443	0.595274	0.557155	0.519516	0.158505	0.0867483	0.0110126
F_40yrs_STR	0.571682	0.506122	0.118198	0.577345	0.596224	0.57411	0.531465	0.113613	0.0830466	0.0123581
F_40yrs_S1C	0.563507	0.473455	0.245467	0.580187	0.619332	0.56878	0.524698	0.130779	0.0456005	0.013324

## Sheet: P_Value
	IQ_GWAS_2018NatGen	IQ_GWAS_2018NatGen_ExNS	SZ_GWAS_2022Nature_eQTL_Fetal	SZ_GWAS_2022Nature_eQTL_PEC.adult	BIP_GWAS_2021NatGen_eQTL_PEC.adult	SZ_High_Confi_Risk_PEC.adult	SZ_Risk_PEC.adult	Random_50	Random_100	Random_1000
M_8pcw_Ocx	1.84e-108	4.54e-20	0.242598	1.1e-13	1.48e-05	1.33e-56	4.23e-138	0.0449179	0.386049	0.059234
M_8pcw_M1C.S1C	8.75e-115	3.94e-22	0.11575	1.96e-14	7.07e-06	1.95e-57	9.51e-141	0.0358533	0.266263	0.103348
M_8pcw_AMY	1.01e-117	5.81e-22	0.173714	5.43e-15	1.91e-06	1.54e-56	1.78e-142	0.0262342	0.223004	0.0825817
M_8pcw_MGE	5.73e-114	3e-20	0.259121	8.26e-15	2.92e-06	3.4e-56	1.99e-140	0.0187841	0.220116	0.0833899
M_8pcw_STC	4.93e-117	2.6e-21	0.133494	7.13e-15	1.19e-06	2e-58	1.98e-145	0.0337142	0.179339	0.326961
M_8pcw_URL	3.12e-122	1.05e-22	0.145988	9.03e-15	4.98e-06	4.84e-58	1.77e-146	0.048702	0.186302	0.158744
M_8pcw_CGE	5.12e-114	3.42e-20	0.213993	2.1e-15	1.37e-05	1.78e-58	2.65e-141	0.0409246	0.111747	0.0794329
M_8pcw_DTH	1.55e-113	1.57e-20	0.108259	2.03e-15	1.28e-05	3.74e-56	1.54e-135	0.0264314	0.167881	0.0901599
M_8pcw_MFC	7.7e-108	4.51e-19	0.146819	6.56e-15	4.16e-06	1.02e-55	3.9e-136	0.0333972	0.23758	0.180307
M_8pcw_DFC	2.11e-101	1.48e-17	0.295224	1.4e-14	6.44e-06	4.31e-53	2.94e-132	0.0582302	0.345177	0.164785
M_8pcw_OFC	1.49e-101	1.27e-18	0.435371	2.43e-14	2.64e-06	8.51e-53	9.46e-134	0.0647808	0.326529	0.163786
M_8pcw_LGE	3.85e-117	4.07e-21	0.0938303	4.04e-15	6.92e-06	3.38e-58	7.41e-143	0.0388865	0.185863	0.0597432
M_8pcw_ITC	2.36e-119	1.29e-22	0.135439	4.36e-15	1.6e-06	8.56e-57	1.3e-141	0.022538	0.294213	0.159929
M_8pcw_HIP	2.77e-109	3.65e-20	0.178417	4.16e-14	3.58e-06	3.81e-55	1.56e-140	0.0801797	0.255022	0.237448
M_8pcw_VFC	1.96e-112	8.02e-21	0.226907	2.47e-14	5.14e-06	5.58e-56	5.54e-138	0.0660746	0.382239	0.105968
M_8pcw_PCx	1.36e-112	1.93e-20	0.130197	1.3e-14	5.12e-06	8.98e-59	8.33e-142	0.021179	0.25064	0.117598
M_9pcw_DFC	9.63e-114	2.42e-22	0.107078	9.44e-14	8.72e-06	2.59e-57	2.71e-138	0.0529353	0.170219	0.216746
M_9pcw_MFC	8.73e-116	6.17e-23	0.0991037	2.12e-14	5.06e-06	3.73e-57	8.59e-140	0.0792572	0.107568	0.0719937
M_9pcw_AMY	8.28e-118	1.73e-22	0.122138	4.44e-15	2.68e-06	2.25e-56	9.3e-139	0.0179414	0.265877	0.170769
M_9pcw_DTH	4.63e-122	8.46e-23	0.175571	2.17e-15	2.55e-06	6.3e-56	1.75e-133	0.0507063	0.104476	0.156679
M_9pcw_URL	1.02e-123	9.9e-24	0.263715	2.43e-14	1.79e-06	4.49e-56	1.86e-139	0.0403125	0.132285	0.0939895
M_9pcw_LGE	1.27e-114	7.12e-22	0.141429	2.85e-14	1.17e-05	1.55e-55	1.38e-135	0.0219127	0.11742	0.086144
M_9pcw_M1C.S1C	2.59e-112	1.58e-21	0.117394	8.44e-14	2.25e-05	1.06e-57	3.12e-138	0.0282071	0.296556	0.0762943
M_9pcw_MGE	1.71e-118	1.59e-23	0.214254	7.82e-15	3.33e-06	2.47e-56	4.33e-137	0.0234934	0.194104	0.142297
M_9pcw_TCx	9.91e-122	9.53e-23	0.0702672	1.73e-14	1.22e-06	4.57e-58	4.19e-140	0.027918	0.366154	0.0848237
M_9pcw_HIP	1.14e-116	3.33e-23	0.162243	5.99e-15	1.19e-05	1.85e-56	4.78e-140	0.0493518	0.32138	0.171278
M_9pcw_Ocx	1.8e-118	1.08e-22	0.0874169	1.21e-14	7.13e-06	3.26e-58	3.38e-141	0.029323	0.302267	0.133092
M_9pcw_CGE	1.03e-114	3.43e-21	0.250422	3.31e-15	1.91e-05	2.98e-58	1.55e-139	0.0392998	0.164804	0.162599
M_9pcw_OFC	1.14e-114	3.8e-22	0.23707	1.89e-14	1.53e-06	2.66e-59	1.44e-145	0.0216115	0.232937	0.0998732
M_9pcw_PCx	3.75e-119	3.19e-23	0.092064	1.84e-14	3.09e-06	3.38e-58	2.81e-141	0.0423739	0.218417	0.121604
F_12pcw_HIP	9.35e-114	1.36e-22	0.25568	3.6e-15	1.64e-06	2.23e-55	2.5e-140	0.0587507	0.115715	0.204533
F_12pcw_DTH	8.63e-122	4.81e-24	0.100143	5.25e-15	8.11e-07	5.14e-58	1.25e-144	0.00679932	0.107607	0.152498
F_12pcw_AMY	1.27e-114	2.26e-21	0.184665	2.04e-15	2.79e-06	2.76e-56	2.19e-141	0.0501537	0.243596	0.124125
F_12pcw_A1C	3.13e-124	6.61e-24	0.065492	9.7e-16	4.4e-07	8.29e-58	5.06e-142	0.0214107	0.132714	0.0871436
F_12pcw_V1C	7.14e-122	2.22e-24	0.0739151	1.08e-15	1.13e-06	3.08e-59	5.23e-144	0.011636	0.251606	0.128132
F_12pcw_MFC	2.56e-123	4.81e-24	0.0678549	1.69e-15	9.9e-07	1.95e-57	4.23e-138	0.0546138	0.178096	0.226335
F_12pcw_STR	2.16e-115	5.05e-20	0.26344	1.07e-15	8.15e-07	2.48e-52	7.12e-130	0.02559	0.127449	0.247419
F_12pcw_M1C	3.44e-124	7.8e-24	0.0688074	6.71e-15	8.58e-07	5.02e-57	9.07e-140	0.0237326	0.139243	0.135432
F_12pcw_DFC	8.83e-125	8.16e-24	0.0687366	2.23e-15	2.78e-07	4.78e-56	2.84e-138	0.0135863	0.196059	0.182744
F_12pcw_ITC	1.12e-122	6.62e-23	0.196222	9.18e-16	7.92e-07	1.94e-57	5.07e-142	0.0209328	0.264275	0.189472
F_12pcw_VFC	3.65e-126	7.28e-25	0.0703325	6.24e-15	6.39e-07	1.37e-56	8.07e-140	0.0391377	0.146265	0.13508
F_12pcw_STC	2.75e-124	1.43e-24	0.0638595	1.65e-15	3.33e-07	1.39e-59	5.47e-143	0.0173646	0.18184	0.096237
F_12pcw_IPC	1.8e-126	1.52e-24	0.0662641	3.86e-15	5.49e-07	3.13e-57	6.43e-142	0.0462614	0.220425	0.188354
F_12pcw_OFC	6.85e-124	1.09e-23	0.0690052	1.79e-15	3.12e-07	4.71e-56	1.12e-138	0.0581594	0.0764753	0.16308
F_12pcw_S1C	3.79e-122	5.18e-24	0.0661507	3.44e-15	7.64e-07	1.42e-56	1.59e-135	0.0405512	0.118343	0.0851432
F_12pcw_STC.1	9.5e-125	1.66e-22	0.148097	1.03e-15	1.98e-07	1.68e-56	9.15e-136	0.0233779	0.260272	0.178738
F_12pcw_V1C.1	3.32e-122	4.09e-23	0.0595321	2.43e-16	6.42e-07	1.94e-59	8.01e-142	0.041524	0.181116	0.109225
F_12pcw_A1C.1	1.11e-124	2.37e-23	0.155532	1.09e-15	2.69e-07	2.25e-56	1.4e-136	0.0442676	0.238137	0.184323
F_12pcw_CB	5.18e-127	4.59e-24	0.174069	1.31e-15	2.19e-06	3.81e-55	2.36e-136	0.0199877	0.192172	0.078017
F_12pcw_ITC.1	2.51e-125	1.32e-22	0.144396	2.89e-15	6.25e-07	1.02e-56	5.44e-139	0.031326	0.263175	0.19538
F_12pcw_IPC.1	6.21e-123	2.3e-22	0.0732397	5.87e-16	1.07e-07	1.27e-56	3.76e-138	0.0517405	0.249397	0.069324
F_12pcw_S1C.1	6.64e-124	5.85e-24	0.142139	3.68e-16	3.04e-07	1.87e-56	3.47e-136	0.0537233	0.194646	0.32168
F_12pcw_DTH.1	7.86e-126	2.89e-22	0.083152	9.65e-17	7.35e-07	4.68e-56	9.6e-134	0.0248806	0.168438	0.15403
F_12pcw_HIP.1	3.11e-121	3.22e-22	0.222201	3.84e-16	2.96e-06	9.53e-58	6.06e-143	0.0238441	0.178063	0.133353
F_12pcw_DFC.1	2.07e-126	1.35e-24	0.123246	3.95e-16	2.81e-07	1.4e-55	9.5e-133	0.0111945	0.265608	0.161478
F_12pcw_OFC.1	1.33e-119	4.8e-22	0.095082	1.01e-16	9.97e-07	1.38e-55	8.5e-134	0.029985	0.362867	0.122351
F_12pcw_M1C.1	3.71e-126	2.98e-25	0.0464194	2.86e-16	4.47e-07	1.9e-56	1.66e-137	0.0317585	0.311792	0.17021
F_12pcw_VFC.1	2.85e-122	1.34e-21	0.0808254	5.15e-16	1.57e-07	1.18e-54	5e-133	0.0319402	0.233203	0.11156
F_12pcw_AMY.1	1.81e-121	2.28e-23	0.141524	1.7e-15	3.19e-07	2.8e-57	2.41e-145	0.0584734	0.188913	0.106953
F_12pcw_STR.1	1.33e-116	2.41e-22	0.117724	1.53e-15	1.43e-06	7.13e-56	3.74e-136	0.0266887	0.123316	0.105646
F_12pcw_AMY.2	4.97e-118	8.63e-22	0.146648	2.53e-16	1.92e-07	5.14e-56	4.81e-138	0.0314404	0.272518	0.100067
F_12pcw_M1C.2	3.77e-122	1.98e-22	0.0871744	1.77e-15	7.37e-07	5.58e-55	2.93e-129	0.0363283	0.274251	0.14751
F_12pcw_ITC.2	3.59e-119	2.09e-21	0.194212	2.61e-16	8.26e-07	4.45e-55	3.45e-135	0.0634271	0.2585	0.147577
F_12pcw_VFC.2	3e-121	5.2e-22	0.0719417	1.31e-15	1.24e-06	4.61e-54	7.56e-133	0.0353231	0.196654	0.12717
F_12pcw_STR.2	1.44e-120	4.9e-22	0.091418	2.01e-16	1.5e-07	3.74e-58	2.04e-142	0.0196711	0.120961	0.0607318
F_12pcw_CBC	1.14e-116	7.43e-21	0.129035	1.82e-15	2.35e-06	2.72e-54	1.44e-135	0.055718	0.240283	0.136476
F_12pcw_DTH.2	1.31e-116	2.22e-20	0.113103	1.75e-15	2.89e-06	1.02e-53	8.24e-132	0.086724	0.168928	0.241165
F_12pcw_DFC.2	1.53e-120	2.85e-22	0.0809644	3.52e-15	6.58e-07	5.84e-55	6.15e-132	0.0279327	0.382184	0.120669
F_12pcw_OFC.2	2.27e-123	3.22e-23	0.0780802	3.42e-16	1.16e-06	3.11e-54	8.72e-134	0.0166298	0.138412	0.0753613
F_12pcw_S1C.2	8.67e-123	1.27e-22	0.0797663	4.17e-15	1.81e-06	4.14e-57	3.1e-137	0.0315419	0.436628	0.142723
F_12pcw_V1C.2	3.78e-122	4.61e-23	0.0524671	8.02e-16	5.57e-07	2.56e-58	7.73e-139	0.0577488	0.292204	0.171937
F_12pcw_MFC.1	2.64e-123	4.31e-23	0.0688828	4.89e-15	7.7e-07	8.11e-56	9.82e-136	0.0369702	0.224032	0.182722
F_12pcw_HIP.2	1.09e-118	2.65e-22	0.089877	1.02e-15	8.74e-07	4.26e-57	1e-140	0.0219173	0.158683	0.0619671
F_12pcw_IPC.2	1.28e-116	1.43e-20	0.116664	2.5e-15	1.57e-06	1.08e-54	9.11e-128	0.0516209	0.318964	0.147404
F_12pcw_A1C.2	8.74e-123	1.15e-21	0.0654581	2.35e-15	1.09e-06	4.78e-56	2.81e-135	0.0209675	0.207246	0.174693
M_13pcw_STR	3.63e-122	1.07e-22	0.0884201	1.36e-16	7.63e-08	1.54e-58	1.03e-143	0.0344162	0.110824	0.0931925
M_13pcw_M1C	1.11e-126	2.57e-24	0.142699	9.67e-16	5.89e-07	2.97e-58	1.15e-139	0.0722273	0.174703	0.162587
M_13pcw_AMY	7.34e-124	6.98e-24	0.177201	1.06e-15	2.86e-07	4.66e-59	1.36e-144	0.0414486	0.141836	0.193792
M_13pcw_S1C	6.9e-127	2.65e-23	0.145003	1.05e-15	4.9e-07	3.48e-59	1.08e-138	0.038347	0.162585	0.130549
M_13pcw_V1C	2.01e-124	1.81e-25	0.142067	3.81e-16	3.51e-07	1.6e-60	3.98e-143	0.0536249	0.14655	0.141046
M_13pcw_A1C	1.24e-122	5.75e-22	0.104073	5e-16	1.29e-06	4.45e-57	6.54e-142	0.0814797	0.2131	0.150119
M_13pcw_HIP	1.09e-116	1.24e-21	0.203677	1.09e-15	5.01e-07	3.66e-57	2.75e-143	0.0346365	0.180634	0.358494
M_13pcw_VFC	3.47e-128	8.27e-25	0.131541	5.66e-16	1.87e-06	2.73e-58	2.75e-139	0.0554199	0.178469	0.1989
M_13pcw_MFC	2.56e-125	3.04e-23	0.332726	6.7e-16	2.28e-06	5.11e-56	9.37e-136	0.049508	0.177255	0.128358
M_13pcw_STC	1.05e-124	4.16e-24	0.0927757	1.36e-15	5.21e-07	2.99e-59	5.4e-143	0.0198055	0.164444	0.121839
M_13pcw_OFC	1.94e-122	5.08e-23	0.240334	9.65e-16	1.01e-06	8.47e-58	1e-139	0.0539487	0.373128	0.170442
M_13pcw_IPC	1.2e-126	4.07e-24	0.141714	2.45e-16	4.66e-07	5.18e-59	2.05e-140	0.0317079	0.261153	0.128046
M_13pcw_DFC	6.52e-127	2.36e-23	0.166155	1.91e-16	1.69e-07	2.09e-57	5.29e-140	0.0169973	0.184978	0.149893
M_13pcw_ITC	8.88e-125	2.05e-24	0.152929	1.95e-15	1.17e-06	1.12e-58	2.42e-144	0.0299254	0.184653	0.131511
F_13pcw_STR	1.44e-120	1.9e-24	0.0969904	1.03e-15	4.44e-07	1.79e-60	1.73e-148	0.0332596	0.144255	0.106373
F_13pcw_S1C	3.76e-128	5.73e-26	0.100613	7.05e-16	3.81e-07	8.34e-58	5.5e-141	0.0121793	0.391849	0.131247
F_13pcw_V1C	2.55e-124	1.32e-24	0.104937	2.24e-15	7.73e-07	2.55e-61	5.97e-149	0.0750059	0.209117	0.121517
F_13pcw_AMY	1.38e-122	2.77e-24	0.1659	1.79e-15	7.55e-07	1.97e-60	6.74e-151	0.0126319	0.193769	0.143407
F_13pcw_IPC	1.79e-126	6.07e-25	0.0508268	2.26e-15	1.38e-06	3.96e-58	6.54e-144	0.0413473	0.296318	0.21549
F_13pcw_CB	1.03e-120	7.97e-24	0.0857464	5.43e-15	1.09e-06	9.18e-58	1.97e-147	0.0323884	0.258218	0.101964
F_13pcw_DFC	4.72e-126	9.69e-25	0.0525162	9.94e-16	3.8e-07	2.97e-58	5.1e-141	0.0668349	0.258021	0.0611282
F_13pcw_OFC	3.01e-113	2.21e-22	0.1037	9.98e-14	2.06e-06	1.64e-51	4.87e-125	0.0690565	0.235175	0.0673189
F_13pcw_STC	7.73e-123	7.05e-24	0.0597121	1.58e-15	1.28e-06	8.02e-58	2.7e-138	0.0204176	0.356897	0.213435
F_13pcw_A1C	1.25e-127	9.5e-24	0.158142	5.3e-16	1.05e-06	1.02e-60	4.4e-146	0.0308586	0.308537	0.218605
F_13pcw_HIP	1e-122	3.63e-25	0.0679793	3.6e-15	9.36e-07	1.91e-59	2.53e-148	0.0137025	0.250277	0.120147
F_13pcw_M1C	7.58e-126	4.19e-24	0.0369858	1.35e-15	3.02e-07	1.35e-57	4.55e-137	0.0168023	0.208701	0.0679065
F_13pcw_ITC	1.35e-124	3.37e-23	0.0710653	6.83e-16	1.34e-06	2.36e-58	6.38e-140	0.0468373	0.341177	0.196739
F_13pcw_MD	3.03e-123	3.35e-23	0.162271	8.23e-16	5.87e-07	1.9e-59	9.07e-144	0.0321491	0.281298	0.237372
F_13pcw_MFC	6.8e-126	1.33e-25	0.0600486	1.12e-15	1.03e-06	4.75e-60	8.05e-146	0.0363847	0.166533	0.100703
F_13pcw_VFC	8.34e-129	1.33e-24	0.0456107	1.97e-15	2.01e-06	1.76e-57	9.58e-142	0.0395896	0.182604	0.252694
M_13pcw_S1C.1	3.14e-122	2.4e-23	0.0974181	2.71e-15	8.71e-07	3.89e-56	6.29e-134	0.0478099	0.279956	0.167746
M_13pcw_DFC.1	8.36e-120	1.14e-22	0.064651	4.3e-15	1.38e-06	5.28e-55	4.92e-133	0.0664862	0.152885	0.123732
M_13pcw_CB	6.34e-121	1.13e-23	0.1192	1.71e-14	4.9e-06	8.93e-58	3.52e-142	0.0160586	0.20074	0.118883
M_13pcw_AMY.1	6.01e-118	1.95e-22	0.161135	2.43e-15	1.15e-05	4.73e-57	8.77e-142	0.0326871	0.215036	0.114284
M_13pcw_ITC.1	3.23e-120	3.37e-22	0.0948445	3.13e-15	3.69e-06	2.29e-57	1.94e-138	0.0418043	0.403746	0.17605
M_13pcw_HIP.1	3.44e-116	3.66e-23	0.129309	2.05e-15	1.64e-05	4.67e-58	1.93e-142	0.0359472	0.128958	0.198781
M_13pcw_IPC.1	1.65e-120	3.78e-24	0.0718926	1.72e-15	9.74e-07	9.52e-57	1.73e-135	0.0344552	0.30384	0.175785
M_13pcw_A1C.1	1.83e-121	9.33e-24	0.0930311	4.41e-16	1.51e-05	1.1e-54	1.57e-131	0.0752179	0.28539	0.166863
M_13pcw_VFC.1	1.24e-118	4.02e-23	0.133555	1.55e-14	2.64e-07	6.93e-54	7.43e-129	0.0172906	0.333592	0.114012
M_13pcw_STR.1	1.45e-114	2.23e-21	0.10457	3.6e-15	1.26e-06	5.3e-56	3.53e-135	0.0263449	0.138983	0.207362
M_13pcw_OFC.1	4.96e-113	4.8e-21	0.339061	1.98e-14	9.24e-07	2.7e-52	1.06e-131	0.0342714	0.442825	0.0990421
M_13pcw_MFC.1	1.94e-112	3.17e-21	0.177254	1.87e-14	4.65e-06	3.25e-53	5.75e-130	0.0222891	0.261267	0.209924
M_13pcw_V1C.1	1.96e-118	4.65e-23	0.0591924	2.83e-15	2.39e-06	1.12e-59	6.66e-141	0.0128204	0.270337	0.0819968
M_13pcw_M1C.1	3.89e-122	1.11e-23	0.050785	3.64e-15	9.95e-07	2.62e-56	4.18e-134	0.00918689	0.178883	0.174591
M_16pcw_VFC	8.11e-123	8.55e-24	0.136328	1.01e-14	1.64e-07	2.81e-59	1.24e-144	0.0488836	0.22834	0.071109
M_16pcw_OFC	2.18e-122	5.21e-25	0.0772719	4.52e-16	7.12e-07	1.71e-58	3.7e-146	0.0710561	0.233231	0.1448
M_16pcw_STC	1.17e-117	7e-23	0.136428	7.92e-15	1.1e-06	2.81e-58	1.28e-144	0.0372109	0.340219	0.14626
M_16pcw_DFC	9.52e-117	3.45e-23	0.135552	4.37e-15	6.57e-07	9.31e-58	2.64e-143	0.0631591	0.233602	0.0951852
M_16pcw_IPC	1.63e-121	5.23e-23	0.129405	3.13e-15	1.98e-07	4.06e-59	1.01e-141	0.0267605	0.342416	0.078717
M_16pcw_A1C	2.79e-123	9.14e-25	0.0883349	8.79e-15	2.37e-07	9.97e-60	2.39e-143	0.0254544	0.332988	0.0626
M_16pcw_MFC	2.01e-114	1.43e-23	0.118672	4.68e-15	1.74e-06	6.1e-58	2e-147	0.0424711	0.138358	0.140654
M_16pcw_STR	1.45e-120	3.11e-24	0.186942	7.26e-16	3.17e-08	2.41e-58	5.18e-144	0.00886211	0.0667444	0.11856
M_16pcw_MD	9.87e-120	1.23e-21	0.157958	1.26e-16	6.59e-08	2.95e-55	2.85e-143	0.0393079	0.120105	0.0598413
M_16pcw_V1C	6.54e-120	5.77e-23	0.176051	1.81e-15	3.34e-07	8.38e-61	4.11e-146	0.00635857	0.283544	0.21703
M_16pcw_VFC.1	2.13e-129	4.61e-26	0.0602392	4.47e-15	1.06e-06	9.89e-59	9.18e-145	0.0261369	0.21238	0.0981253
M_16pcw_STC.1	6.37e-125	7.73e-25	0.0539815	1.78e-15	2.15e-06	3.15e-61	1.25e-150	0.0261154	0.270106	0.0405812
M_16pcw_IPC.1	5.27e-128	2.23e-25	0.0978133	4.18e-15	4.26e-07	5.38e-60	3.87e-144	0.0489966	0.175355	0.0742452
M_16pcw_A1C.1	1.15e-125	9.22e-25	0.0595672	3.01e-16	4.54e-07	3.47e-57	2.91e-143	0.0152515	0.169632	0.0981363
M_16pcw_MD.1	2.34e-124	2.48e-24	0.0834516	1.25e-16	1.23e-07	2.83e-57	1.37e-144	0.0549531	0.237146	0.0506834
M_16pcw_AMY	5.19e-119	2.29e-23	0.126047	2e-15	9.91e-07	9.24e-60	3.43e-151	0.038695	0.167441	0.166311
M_16pcw_V1C.1	1.2e-120	3.8e-24	0.0763417	5.56e-15	3.77e-07	1.3e-58	1.23e-145	0.0194621	0.269831	0.0681015
M_16pcw_ITC	7.4e-126	3.91e-25	0.141841	4.92e-15	4.97e-07	5.61e-57	3.98e-144	0.02802	0.191411	0.0834007
M_16pcw_CBC	2.72e-113	4.91e-22	0.356006	1.37e-15	4.43e-06	1.2e-55	1.67e-144	0.0351587	0.153894	0.157017
M_16pcw_HIP	3.35e-124	1.63e-24	0.0813742	3.33e-15	1.91e-07	4.11e-58	1.05e-148	0.0260675	0.106734	0.11508
M_16pcw_STR.1	1.64e-124	1.32e-24	0.0943805	2.88e-16	8.79e-08	3.26e-60	2.44e-149	0.0226243	0.126737	0.0883195
M_16pcw_OFC.1	6.56e-127	1.08e-24	0.142454	6.44e-15	5.74e-07	1.65e-58	1.13e-145	0.0364438	0.315212	0.111213
M_16pcw_DFC.1	3.09e-129	1.12e-25	0.0419936	2.81e-15	1.41e-06	1.3e-59	5.88e-146	0.0414017	0.102769	0.096646
M_16pcw_M1C	1.26e-127	9.72e-25	0.0560699	5.93e-16	4.64e-07	7.57e-57	8.46e-136	0.0652702	0.156601	0.0364469
M_16pcw_MFC.1	3.51e-126	5.63e-26	0.0684651	2.24e-15	4.28e-06	2.4e-57	6.19e-145	0.0253863	0.165856	0.0454995
M_16pcw_S1C	2.83e-126	9.79e-25	0.137423	6.13e-15	1.94e-07	7.05e-58	3.27e-142	0.0309739	0.23368	0.0745498
M_16pcw_HIP.1	2.13e-116	7.15e-22	0.277616	4.23e-15	1.04e-06	2.67e-58	1.51e-143	0.0316971	0.124723	0.0514566
M_16pcw_ITC.1	4.74e-122	7.9e-23	0.215487	8.08e-16	4.35e-07	3.54e-59	9.66e-143	0.0486672	0.128058	0.181624
M_16pcw_DFC.2	1.5e-119	6.94e-22	0.492326	4.97e-14	1.11e-06	1.36e-54	3.74e-135	0.0594085	0.358462	0.290262
M_16pcw_IPC.2	3.89e-125	3.28e-23	0.196151	1.53e-15	4.39e-07	5.45e-60	1.96e-147	0.0193869	0.191186	0.131561
M_16pcw_STC.2	1.22e-124	2.28e-24	0.240598	3.65e-15	5.19e-07	2.05e-60	6.48e-147	0.0165339	0.157468	0.259291
M_16pcw_V1C.2	1.12e-118	6.16e-22	0.329287	9.86e-16	2.32e-07	1.26e-56	1.87e-139	0.0730759	0.293843	0.19984
M_16pcw_MD.2	7e-115	5.82e-21	0.213939	1.29e-16	7.33e-07	5.38e-54	2.43e-133	0.0363816	0.147641	0.224048
M_16pcw_STR.2	1.15e-119	3.67e-22	0.424771	3.77e-15	2.76e-08	1.4e-58	5.28e-143	0.0414138	0.0566695	0.193756
M_16pcw_M1C.S1C	2.87e-128	4.12e-24	0.114593	9.86e-16	3.22e-07	2.75e-60	2.01e-145	0.0275498	0.222332	0.148562
M_16pcw_A1C.2	1.6e-123	5.36e-23	0.252904	1.19e-15	4.01e-07	4.98e-57	1.39e-142	0.0594216	0.234164	0.139966
M_16pcw_VFC.2	1.24e-128	1.51e-23	0.219482	2.26e-15	3.23e-07	7.33e-60	9.24e-147	0.00786025	0.199854	0.257403
M_16pcw_AMY.1	1.73e-121	3.25e-22	0.181715	7.64e-16	1.59e-07	4.64e-58	1.17e-143	0.0355596	0.134378	0.136287
M_16pcw_MFC.2	1.61e-118	1.29e-21	0.21318	1.35e-14	4.77e-07	1.52e-55	7.22e-142	0.0717827	0.235371	0.191204
F_17pcw_STR	2.72e-115	3.99e-23	0.198226	1.5e-15	3.73e-08	1.76e-57	4.53e-147	0.0295357	0.176845	0.0730855
F_17pcw_STC	1.88e-118	1.82e-24	0.0328239	4.44e-16	1.14e-06	8.15e-59	1.03e-142	0.0103974	0.229072	0.056885
F_17pcw_MD	1.26e-118	1.61e-22	0.095828	8.65e-16	4.78e-07	3.77e-57	5.87e-144	0.0213695	0.270405	0.114001
F_17pcw_A1C	5.53e-124	7.89e-24	0.0556771	3.2e-16	1.26e-07	1.5e-58	8.68e-143	0.0279939	0.244422	0.27215
F_17pcw_HIP	1.43e-118	1.09e-24	0.0883582	1.01e-15	1.51e-07	1.19e-58	1.37e-152	0.0217472	0.16449	0.0768943
F_17pcw_DFC	6.5e-124	3.77e-25	0.056072	2.89e-15	6.34e-07	4.81e-59	9.66e-146	0.0343359	0.257432	0.0487717
F_17pcw_VFC	4.65e-125	5.36e-26	0.0535603	2.18e-15	4.56e-07	3e-60	2.08e-150	0.00961431	0.284239	0.0661389
F_17pcw_IPC	2.33e-121	9.29e-23	0.0564122	7.65e-16	8.94e-07	2.68e-57	8.62e-136	0.00903395	0.172183	0.129669
F_17pcw_M1C.S1C	2.12e-123	1.86e-24	0.0607887	3.03e-16	4.06e-07	2.91e-58	2.18e-143	0.0391156	0.288658	0.13378
F_17pcw_V1C	8.35e-121	1.27e-24	0.067321	6.96e-15	9.69e-07	2.55e-62	1.88e-150	0.0122107	0.222888	0.072952
F_17pcw_CBC	1.03e-117	7.63e-23	0.181083	6.05e-15	3.23e-07	5.24e-56	1.18e-142	0.0152013	0.162478	0.025195
F_17pcw_OFC	7.04e-124	3.85e-25	0.0695924	4.29e-15	1.38e-07	1.37e-58	8.75e-145	0.0225979	0.134082	0.0526997
F_17pcw_AMY	1.61e-118	3.11e-23	0.0906387	2.78e-15	7.15e-07	8.71e-59	4.08e-146	0.021449	0.216076	0.129029
F_17pcw_MFC	6.87e-123	4.71e-25	0.0572443	1.6e-15	5.29e-07	8.85e-59	5.9e-145	0.0149866	0.246388	0.0714727
F_19pcw_STC	2.36e-117	4.36e-23	0.0489344	1.02e-15	1.45e-06	4.55e-58	3.43e-143	0.0239828	0.306594	0.185419
F_19pcw_IPC	1.57e-117	5.07e-23	0.0375154	2.91e-15	9.55e-07	1.8e-58	3.58e-145	0.0440323	0.310877	0.16215
F_19pcw_M1C.S1C	1.31e-118	5.23e-22	0.0570596	1.58e-15	3.15e-06	3.93e-60	1e-147	0.0440369	0.256234	0.0949834
F_19pcw_MFC	2.41e-120	2.7e-25	0.0800854	2.3e-15	1.09e-06	4.86e-60	1.29e-150	0.0212216	0.268283	0.111986
F_19pcw_V1C	5.05e-119	2.09e-23	0.0435558	3.08e-16	3.76e-06	2.47e-61	9.56e-152	0.0436636	0.377111	0.116804
F_19pcw_HIP	7.97e-110	9.23e-23	0.162275	5e-15	1.31e-06	1.02e-55	2.53e-144	0.0265166	0.168063	0.0625206
F_19pcw_A1C	6.72e-117	1.78e-23	0.03368	3.92e-15	6.16e-07	1.26e-56	2.01e-142	0.0323431	0.232795	0.113171
F_19pcw_MD	4.76e-115	2.43e-22	0.0549115	9.51e-16	1.04e-06	3.77e-56	2.03e-142	0.0154609	0.257445	0.0962086
F_19pcw_VFC	4.44e-125	6.2e-25	0.0470363	2.95e-16	1.01e-06	1.4e-60	1.38e-147	0.0322647	0.18677	0.0984676
F_19pcw_STR	1.64e-114	2.06e-23	0.101493	6.28e-15	2.3e-07	8.15e-59	7.49e-148	0.0441962	0.237656	0.154067
F_19pcw_DFC	3.83e-119	1.96e-24	0.0571175	3.54e-15	2.46e-06	4.55e-58	1.31e-144	0.0153616	0.290083	0.0574981
F_21pcw_CBC	1.93e-120	1.13e-23	0.107482	6.02e-16	1.47e-06	7.79e-54	2.54e-137	0.00865491	0.207636	0.101349
F_21pcw_ITC	9.03e-124	1.1e-24	0.0338366	1.31e-15	1.84e-07	3.38e-59	3.52e-147	0.0184732	0.240232	0.110461
M_21pcw_MFC	5.44e-127	1e-23	0.0816974	3.94e-16	4.33e-08	2.65e-60	1.08e-144	0.015568	0.208414	0.191204
M_21pcw_M1C	2.91e-126	4.44e-24	0.0832498	5.22e-15	7.03e-08	5.58e-59	9.98e-144	0.0393799	0.137671	0.0667192
M_21pcw_STR	1.38e-119	9.21e-23	0.217506	6.78e-16	4.79e-09	7.08e-60	1.16e-146	0.0480521	0.124154	0.101187
M_21pcw_HIP	3.14e-124	1.1e-24	0.154818	2.68e-16	1e-07	1.26e-58	3.41e-147	0.0414662	0.147904	0.11657
M_21pcw_STC	7.42e-128	4.54e-24	0.0644852	1.46e-15	8.16e-08	1e-59	9.51e-149	0.0401526	0.208111	0.139489
M_21pcw_ITC	5.74e-129	1.57e-24	0.109069	2.24e-16	1.03e-07	1.42e-60	2.02e-146	0.07119	0.309167	0.101589
M_21pcw_AMY	2.16e-122	8.37e-24	0.116235	1.97e-15	1.64e-07	6.31e-57	2.86e-144	0.0208252	0.406985	0.189896
M_21pcw_VFC	7.79e-123	1.93e-23	0.118692	2.1e-15	1.73e-07	8.46e-59	1.38e-147	0.0320511	0.185079	0.17694
M_21pcw_OFC	6.53e-126	6.1e-24	0.179287	2.9e-15	1.33e-07	1.4e-60	3.25e-145	0.0274789	0.37336	0.21996
M_21pcw_V1C	2.53e-127	5.32e-24	0.0719487	1.29e-16	1.31e-07	1.83e-61	1.7e-150	0.0250281	0.265915	0.0877238
M_21pcw_S1C	8.25e-129	1.08e-24	0.0702437	4.73e-16	1.02e-07	1.93e-59	2.37e-145	0.0501389	0.196023	0.185637
M_21pcw_CBC	5e-119	4.67e-23	0.277781	1.02e-15	2.2e-07	3.16e-55	5.51e-141	0.0311156	0.169483	0.103481
M_21pcw_IPC	8.35e-127	5.92e-24	0.186949	1.18e-15	8.11e-07	1.24e-60	7.73e-145	0.036211	0.255178	0.0749597
M_21pcw_DFC	2.84e-124	2.78e-23	0.0814293	6.43e-16	3.23e-08	1.04e-60	2.14e-150	0.0160581	0.313741	0.141297
M_24pcw_HIP	2.22e-120	4.74e-23	0.184631	2.43e-16	1.4e-07	6.31e-57	1.59e-149	0.00702347	0.206214	0.395153
M_24pcw_AMY	8.63e-118	1.08e-22	0.0842542	2.24e-15	7.17e-07	9.42e-60	5.78e-149	0.028919	0.243057	0.230432
M_24pcw_DFC	4.53e-129	2.5e-24	0.0830673	1.39e-16	2.46e-07	7.44e-59	3.03e-145	0.0303673	0.378121	0.224833
M_24pcw_S1C	7e-130	7.81e-25	0.0633892	3.4e-17	1.44e-08	2.46e-60	1.58e-149	0.0222844	0.228783	0.265324
M_24pcw_MD	5.96e-119	8.73e-23	0.240469	8.71e-17	6.44e-08	3.85e-57	7.55e-145	0.0539623	0.188916	0.136901
M_24pcw_STR	7.54e-123	7.64e-25	0.195371	2.83e-17	1.45e-08	1.61e-60	4.81e-151	0.0400139	0.0895224	0.121526
M_24pcw_A1C	1.29e-125	8.79e-24	0.170438	6.61e-17	1.63e-08	3.92e-60	2.58e-147	0.0343694	0.280743	0.253731
M_24pcw_IPC	4.12e-127	2.42e-23	0.0651799	7.86e-17	1.82e-08	1.95e-59	6.54e-147	0.0699061	0.333659	0.195391
M_24pcw_OFC	6.63e-127	3.76e-23	0.181466	1.35e-16	3.69e-08	3.88e-60	1.74e-145	0.0186194	0.472541	0.249513
M_24pcw_STC	2.41e-123	1.33e-23	0.0602235	1.85e-16	6.79e-08	4.39e-60	6.75e-151	0.0427983	0.353067	0.16499
M_24pcw_ITC	2.97e-128	3.35e-24	0.0553078	9.14e-17	6.83e-08	2.57e-60	3.46e-145	0.0355972	0.278454	0.226829
M_24pcw_VFC	1.12e-128	2.34e-24	0.0655513	2.94e-17	1.45e-07	2.59e-60	5.28e-149	0.0391488	0.302396	0.267091
M_24pcw_M1C	1.09e-124	3.96e-23	0.0947114	1.91e-16	1.08e-07	1.14e-60	1.91e-150	0.0448548	0.145003	0.20915
M_24pcw_MFC	8.61e-129	2.8e-26	0.0530442	1.48e-16	8.47e-08	3.53e-59	1.9e-145	0.0367784	0.273809	0.142744
M_24pcw_CBC	1.12e-116	4.27e-22	0.287077	4.75e-15	1.46e-07	7.13e-55	2.4e-138	0.0325229	0.290915	0.216825
M_24pcw_V1C	6.7e-126	7.95e-25	0.0686939	1.47e-16	7.95e-08	2.46e-62	1.51e-152	0.0101941	0.444722	0.121012
F_25pcw_A1C	2.39e-112	3.57e-21	0.230699	3.97e-15	1.21e-07	5.61e-60	2.04e-151	0.0230292	0.286421	0.280934
F_26pcw_STC	1.04e-118	2.63e-22	0.0898578	1.02e-15	8.71e-07	4.27e-57	2.34e-140	0.0218581	0.158254	0.0612365
F_26pcw_V1C	2.09e-111	1.4e-21	0.218746	8.4e-16	6.62e-08	1.62e-60	1.52e-153	0.0339102	0.355268	0.096553
F_26pcw_DFC	4.58e-111	6.03e-21	0.253183	3.13e-15	1.06e-07	4.19e-60	2.36e-154	0.126962	0.463006	0.267308
F_35pcw_CBC	4.75e-107	4.14e-23	0.182882	2.52e-13	4.51e-07	8.38e-55	7.13e-140	0.0581314	0.34096	0.245428
F_35pcw_VFC	1.7e-124	7.61e-26	0.110716	3.59e-16	3.7e-07	6.81e-67	5.4e-171	0.0386879	0.374663	0.198127
M_37pcw_A1C	1.65e-118	2.56e-23	0.137328	9.36e-16	1.76e-08	6.4e-61	6.87e-152	0.021909	0.228226	0.248048
M_37pcw_OFC	2.84e-116	8.03e-24	0.256686	1.9e-15	3.38e-08	1.49e-60	1.71e-151	0.0162202	0.201919	0.380532
M_37pcw_AMY	7.67e-107	1.22e-22	0.295742	8.73e-15	3.94e-07	7.14e-59	2.61e-150	0.0203942	0.249005	0.131765
M_37pcw_V1C	3.62e-116	3.97e-23	0.200563	7.36e-16	9e-08	7.03e-60	5.23e-153	0.0353911	0.236459	0.225301
M_37pcw_MFC	3.62e-116	9.07e-24	0.130466	1.68e-15	1.49e-07	2.18e-62	5.64e-155	0.031713	0.196127	0.258979
M_37pcw_MD	3.69e-103	4.18e-21	0.323399	2.93e-15	4.51e-07	2.65e-57	2.79e-145	0.0544703	0.145106	0.227271
M_37pcw_CBC	2.2e-110	2.1e-22	0.16286	3.38e-15	1.9e-07	7.51e-58	2.92e-146	0.0251446	0.0918771	0.190994
M_37pcw_STR	3.52e-106	1.22e-22	0.302939	2.3e-14	3.75e-07	4.01e-60	8.66e-152	0.0504273	0.139711	0.228884
M_37pcw_IPC	3.11e-120	1.96e-23	0.101273	9.17e-16	4.26e-08	4.03e-62	1.08e-154	0.0174608	0.234909	0.285301
M_37pcw_ITC	8.04e-119	1.01e-24	0.0865659	1.66e-15	5.09e-08	5.75e-61	2.1e-155	0.0267086	0.243646	0.256158
M_37pcw_S1C	7.61e-115	3.1e-23	0.160269	4.5e-16	1.29e-07	1.81e-62	3.82e-153	0.0257742	0.251802	0.364463
M_37pcw_DFC	9.95e-118	4.36e-24	0.23102	9.84e-16	7.01e-08	1.24e-61	7.86e-156	0.0134794	0.155576	0.219775
M_37pcw_STC	4.24e-118	7.06e-24	0.126078	4.64e-16	4.9e-08	5.23e-63	1.1e-155	0.0165333	0.175495	0.285699
M_37pcw_M1C	2.12e-113	3.33e-23	0.175976	3.01e-15	2.43e-07	2.49e-61	8.7e-155	0.0386311	0.186407	0.269675
M_37pcw_VFC	8.35e-116	7.96e-24	0.23813	2.54e-15	1.1e-07	5.32e-61	7e-155	0.00907915	0.181796	0.2768
M_37pcw_HIP	7.18e-106	1.15e-23	0.286587	3.86e-14	2.36e-06	3.27e-60	1.16e-155	0.0367771	0.171712	0.149938
M_4mos_STC	5.33e-116	6.61e-22	0.184416	2.78e-16	2.76e-09	1.83e-56	4.45e-141	0.0272073	0.113737	0.185294
M_4mos_STR	7.31e-114	1.81e-21	0.317458	1.1e-15	2.07e-09	9.62e-61	4.79e-155	0.035794	0.10621	0.202629
M_4mos_V1C	1.85e-124	1.33e-23	0.105506	3.44e-17	6.55e-10	1.77e-60	3.52e-151	0.0401252	0.250547	0.217135
M_4mos_CBC	1.85e-111	6.26e-21	0.245013	7.22e-16	3.29e-07	3.56e-56	8.69e-142	0.0646468	0.151767	0.128159
M_4mos_HIP	7.39e-118	2.65e-22	0.151876	3.2e-16	2.69e-09	9.17e-59	1.21e-149	0.0216453	0.222451	0.0812753
M_4mos_MD	6.84e-115	3.14e-21	0.117215	1.17e-16	1.7e-08	1.98e-55	5.88e-142	0.0135347	0.104893	0.144923
M_4mos_ITC	6.06e-115	7.9e-20	0.272449	1.5e-16	1.36e-08	5.47e-54	7.89e-140	0.0366137	0.129166	0.195478
M_4mos_AMY	3.83e-118	8.78e-23	0.287491	3.76e-16	4.01e-09	8.47e-60	1.37e-157	0.0561243	0.149148	0.25857
M_4mos_MFC	1.05e-117	9.39e-22	0.296496	1.59e-16	2.27e-09	1.01e-57	1.72e-148	0.0383346	0.236144	0.16718
M_4mos_M1C	2.74e-115	1.68e-22	0.161557	3.03e-16	8.21e-08	6.62e-61	6.14e-156	0.0399924	0.339492	0.180703
M_4mos_DFC	2.77e-108	5.84e-22	0.1658	6e-16	1.68e-07	5.98e-56	1.45e-148	0.0792174	0.364911	0.0629399
M_4mos_OFC	3.73e-115	4.45e-23	0.135079	3.41e-16	2.41e-07	6.13e-60	1.31e-155	0.0277627	0.195701	0.139658
M_4mos_A1C	1.09e-108	8.58e-22	0.133046	1.26e-15	3.6e-07	4.09e-57	6.62e-151	0.0166312	0.268441	0.160271
M_4mos_STC.1	2.24e-108	9.11e-21	0.163017	3.44e-16	1.15e-07	1.44e-57	1.12e-152	0.0440204	0.239105	0.0947489
M_4mos_VFC	5.07e-113	3.88e-23	0.248472	1.73e-16	2.07e-07	2e-58	6.31e-155	0.0807508	0.283926	0.179373
M_4mos_ITC.1	1.43e-110	3.26e-21	0.247168	1.65e-16	4.01e-07	1.91e-57	2.32e-152	0.0426764	0.408494	0.185754
M_4mos_AMY.1	2.24e-113	2.71e-23	0.159927	1.34e-15	3.11e-07	3.51e-58	3.41e-152	0.0760857	0.234232	0.0670025
M_4mos_M1C.1	2.39e-121	8.69e-23	0.12605	1.42e-17	6.37e-10	2.57e-63	2.22e-161	0.0550391	0.210976	0.130397
M_4mos_MD.1	7.04e-118	3.72e-22	0.194621	2.06e-17	5.67e-09	6.29e-59	1.99e-149	0.0418456	0.154257	0.177623
M_4mos_OFC.1	3.21e-120	9.98e-23	0.128397	2.28e-17	4.57e-09	1.76e-61	9.31e-154	0.0465133	0.206474	0.278119
M_4mos_STR.1	2.47e-114	2.24e-21	0.202417	6.88e-16	1.59e-08	5.87e-59	1.33e-155	0.0676744	0.0625022	0.257782
M_4mos_STC.2	1.63e-120	5.79e-22	0.111185	2.13e-17	4.54e-08	1.42e-60	6.06e-155	0.0922998	0.276252	0.181048
M_4mos_A1C.1	9.8e-121	2.06e-22	0.13906	4.69e-17	9.27e-09	3.44e-61	7.15e-156	0.0441629	0.159713	0.117212
M_4mos_HIP.1	8.65e-116	7.87e-21	0.22812	4.42e-16	9.45e-08	4.37e-58	1.13e-153	0.0655879	0.131039	0.181644
M_4mos_AMY.2	5.96e-121	2.17e-22	0.131351	1.34e-16	2.01e-08	1.37e-60	2.49e-154	0.0418113	0.095038	0.198827
M_4mos_MFC.1	4.19e-121	1.54e-22	0.250215	1.47e-17	1.03e-08	5.53e-63	2.72e-158	0.0573225	0.140168	0.215468
M_4mos_V1C.1	1.31e-125	7.69e-23	0.220229	1.57e-17	3.97e-09	3.37e-63	8.83e-158	0.0268571	0.204065	0.12939
M_4mos_ITC.2	5.76e-122	7.04e-22	0.31109	7.17e-17	4.76e-09	6e-62	1.29e-155	0.0581209	0.20523	0.263412
M_4mos_S1C	6.44e-123	2.53e-22	0.234394	4.48e-17	1.05e-09	2.95e-64	1.07e-158	0.0251494	0.204376	0.26175
M_4mos_IPC	1.08e-122	1.18e-22	0.116539	4.16e-17	1.52e-09	2.31e-61	1.35e-156	0.0430436	0.224101	0.295161
M_4mos_CBC.1	9.65e-118	3.32e-23	0.263652	5.69e-16	1.52e-07	2.25e-59	9.8e-151	0.0289745	0.165674	0.129174
M_4mos_DFC.1	1.5e-121	1.3e-22	0.116945	4.76e-17	7.97e-09	8.47e-62	4.32e-156	0.0962691	0.183807	0.197388
M_4mos_VFC.1	1.52e-122	3.84e-23	0.261589	4.45e-17	1.2e-08	5.3e-61	1.85e-154	0.0334691	0.204883	0.186791
M_10mos_S1C	1.33e-116	9.63e-23	0.340731	3.95e-17	1.3e-09	1.59e-58	3.64e-148	0.0415355	0.293814	0.161457
M_10mos_IPC	7.24e-114	1.7e-22	0.406784	3.31e-16	4.46e-09	3.66e-59	7.32e-149	0.0668824	0.149311	0.219955
M_10mos_STC	9.48e-115	4.77e-22	0.173386	1.94e-16	2.73e-09	3.79e-59	2.73e-150	0.0261044	0.0503639	0.128622
M_10mos_DFC	1.58e-116	1.47e-22	0.26733	3.2e-17	3.33e-09	1.02e-58	3.25e-149	0.0303499	0.237579	0.207217
M_10mos_OFC	2.17e-116	5.3e-22	0.201609	1.96e-16	3.6e-09	1.12e-59	9.28e-149	0.0121363	0.103228	0.0904886
M_10mos_MFC	1.52e-116	2.16e-23	0.16009	4.9e-16	3.67e-09	2.78e-60	1.43e-152	0.0318566	0.0729564	0.136625
M_10mos_CBC	1.07e-114	1.8e-23	0.237634	9.55e-15	2.58e-06	3.59e-60	3.27e-143	0.026156	0.0923347	0.0445491
M_10mos_ITC	6.26e-115	7.07e-22	0.11964	9.58e-17	3.52e-09	1.12e-60	2.28e-151	0.0150452	0.178461	0.181155
M_10mos_MD	8.83e-108	5.49e-21	0.367834	4.58e-16	2.72e-08	8.49e-56	7.18e-144	0.0323903	0.19473	0.0815489
M_10mos_V1C	1.89e-117	1.3e-22	0.239586	8.51e-17	1.89e-09	1.26e-60	1.39e-151	0.011988	0.029454	0.199364
F_1yrs_AMY	1.39e-119	3.22e-22	0.234366	2.35e-16	2.23e-09	7.11e-61	1.89e-153	0.114373	0.160523	0.127782
F_1yrs_M1C	7.76e-114	7.78e-22	0.60461	1.08e-14	8.13e-09	1.58e-55	1.03e-138	0.0278005	0.270388	0.404161
F_1yrs_DFC	1.84e-123	1.8e-23	0.386012	8.61e-17	4.88e-10	9.95e-61	5.83e-152	0.0386801	0.151937	0.225729
F_1yrs_STC	3.78e-124	2.08e-23	0.349391	6.93e-17	6.45e-10	1.01e-59	2.5e-148	0.0356838	0.17341	0.175516
F_1yrs_V1C	3.72e-126	5.93e-24	0.294314	1.59e-17	5.77e-10	3.64e-59	1.08e-149	0.0440468	0.0983697	0.214679
F_1yrs_MFC	4.87e-119	8.02e-22	0.387208	1.53e-16	1.05e-09	7.58e-58	1.87e-148	0.0290535	0.13787	0.165853
F_1yrs_OFC	1.59e-121	1.85e-23	0.18837	2.82e-17	5.91e-10	4.85e-59	4.51e-154	0.0597209	0.0892085	0.188675
F_1yrs_ITC	3.32e-124	9.67e-23	0.4474	6.89e-17	2.2e-09	1.09e-59	1.2e-151	0.0361416	0.0860978	0.304413
F_1yrs_S1C	8.45e-125	2.92e-23	0.330389	4.51e-17	2.12e-10	3.41e-60	2.82e-150	0.0722299	0.123701	0.176731
F_1yrs_VFC	4.84e-124	8.12e-23	0.171394	6.64e-17	4.63e-10	1.27e-59	1.03e-148	0.0480093	0.201752	0.217124
F_1yrs_CBC	2.83e-117	1.78e-22	0.394589	1.93e-16	1.01e-07	3.29e-59	2.04e-144	0.0200901	0.194401	0.110429
F_1yrs_A1C	1.07e-122	1.44e-22	0.316749	5.17e-17	6.08e-10	1.17e-59	1.25e-148	0.0203656	0.127533	0.153443
F_1yrs_MD	1.25e-115	2.41e-21	0.299623	2.52e-17	4.19e-08	2.89e-56	2.43e-144	0.0230468	0.191611	0.0436116
F_1yrs_HIP	1.96e-119	4.94e-22	0.486526	2.09e-16	1.52e-09	5.85e-57	4.25e-149	0.0482225	0.12801	0.109462
F_1yrs_IPC	2.3e-123	3.85e-23	0.316405	1.74e-17	2.22e-10	9.69e-60	6.81e-152	0.0138892	0.214386	0.17604
F_1yrs_STR	7.64e-119	1.28e-21	0.398748	7.54e-16	2.31e-09	4.82e-60	2.44e-150	0.0190658	0.0773387	0.142045
F_2yrs_VFC	1.27e-108	5.68e-21	0.211336	3.97e-15	3.95e-07	7.54e-60	1.01e-156	0.0816853	0.386827	0.206367
F_2yrs_IPC	2.53e-109	1.46e-20	0.178705	6.85e-15	3.83e-07	3.09e-57	3.25e-149	0.0758394	0.313619	0.251222
F_2yrs_S1C	1.45e-108	1.13e-20	0.182243	1.01e-14	2.59e-07	8.75e-61	8.96e-155	0.190073	0.248116	0.208111
F_2yrs_ITC	4.2e-110	2.34e-20	0.185428	5.75e-14	2.6e-07	7.46e-61	9.39e-151	0.151131	0.259904	0.138933
F_2yrs_MD	2.54e-107	4.2e-20	0.107701	1.17e-14	8.07e-07	3.26e-57	7.73e-147	0.0920669	0.30171	0.256151
F_2yrs_DFC	1.58e-109	2.41e-21	0.205818	1.22e-15	2.67e-07	1.16e-61	2.25e-157	0.102898	0.698965	0.281813
F_2yrs_MFC	5.4e-109	3.38e-20	0.167327	7.34e-15	8.89e-08	5.95e-59	1.64e-151	0.046629	0.58265	0.127474
F_2yrs_CBC	1e-113	8.26e-21	0.264043	3.62e-15	5.37e-07	3.91e-60	2.51e-153	0.0749195	0.218511	0.278398
F_2yrs_HIP	8.77e-105	1.59e-20	0.184752	3.64e-14	2.08e-06	2.16e-58	5.03e-151	0.0718891	0.216093	0.20676
F_2yrs_OFC	8.49e-113	3.32e-21	0.0595882	3.85e-15	2.48e-07	7.49e-61	2.59e-153	0.0128267	0.467169	0.217744
F_2yrs_V1C	1.48e-113	1.1e-21	0.0941084	2.49e-15	8.82e-08	7.13e-62	1.05e-156	0.0785498	0.529532	0.239938
F_2yrs_STC	3.53e-111	8.2e-21	0.217483	8.35e-15	2.63e-07	7.26e-62	2.28e-151	0.0882249	0.468507	0.0782678
F_3yrs_STR	3.95e-106	1.2e-20	0.257973	3.72e-15	8.21e-08	6.15e-58	2.37e-154	0.0631922	0.0964265	0.186395
F_3yrs_STC	8.45e-114	1.12e-22	0.195539	1.67e-16	9.37e-09	2.31e-59	8.15e-158	0.0648875	0.234991	0.151309
F_3yrs_IPC	4.16e-113	8.02e-21	0.361781	1.35e-16	4.93e-09	3.88e-58	2.07e-151	0.06343	0.191672	0.285809
F_3yrs_ITC	3.97e-114	1.14e-21	0.131676	1.08e-16	3.54e-08	2.99e-59	1.18e-156	0.0816009	0.468914	0.280738
F_3yrs_CBC	4.27e-112	1.04e-22	0.218293	1.34e-15	7.55e-06	1.12e-58	7.91e-142	0.0346013	0.14284	0.0444147
F_3yrs_AMY	2.23e-110	3.2e-21	0.155528	1.02e-15	1.85e-07	4.02e-59	3.01e-154	0.0426338	0.212216	0.26201
F_3yrs_VFC	4.82e-112	3.18e-21	0.243862	5.73e-16	7.72e-09	1.36e-56	4.98e-149	0.0452787	0.258205	0.202111
F_3yrs_M1C	1.44e-114	2.94e-21	0.25609	3.05e-17	1e-08	3.41e-59	9.93e-152	0.0437983	0.224811	0.116157
F_3yrs_A1C	8.62e-114	5.45e-22	0.250011	4.77e-17	6.22e-09	2.26e-60	9.57e-160	0.0590234	0.15984	0.212383
F_3yrs_MD	1.12e-109	2.26e-21	0.167642	2.62e-16	1.37e-07	3.78e-60	2.31e-159	0.0735507	0.121406	0.0667317
F_3yrs_V1C	7.21e-115	1.75e-22	0.232114	3.27e-17	3.96e-09	1.54e-59	5.72e-155	0.0724267	0.123329	0.320508
M_3yrs_OFC	1.04e-112	1.24e-21	0.236342	6.08e-16	2.15e-08	1.01e-59	2.86e-155	0.171719	0.306993	0.250965
M_3yrs_MFC	5.58e-112	1.54e-21	0.132595	2.64e-15	2.01e-07	1.69e-60	1.42e-151	0.0952366	0.187391	0.0949228
M_3yrs_M1C	1.24e-111	2.93e-21	0.265694	3.1e-16	6.74e-08	9.8e-63	1.72e-156	0.0365917	0.434995	0.39111
M_3yrs_S1C	6.39e-112	1.5e-22	0.242891	9.06e-16	1.3e-07	5.69e-62	4.4e-157	0.0231195	0.288322	0.117985
M_3yrs_STC	8.23e-113	3.56e-21	0.285712	8.16e-16	7.8e-08	3.2e-60	2.85e-154	0.0323334	0.363344	0.36724
M_3yrs_IPC	5.1e-112	3.93e-23	0.244685	1.9e-15	6.25e-08	7.68e-61	2.52e-152	0.0355003	0.268211	0.148445
M_3yrs_A1C	2.53e-111	3.17e-21	0.24444	6.08e-16	1.27e-07	6.85e-60	5.34e-155	0.0586126	0.442805	0.167434
M_3yrs_CBC	3.48e-114	5.78e-22	0.165169	5.74e-16	5.13e-07	7.34e-58	5.91e-142	0.0225964	0.204996	0.0303785
M_3yrs_V1C	2.16e-111	1.44e-21	0.219846	8.52e-16	6.63e-08	1.67e-60	7.04e-154	0.0338981	0.35527	0.0966298
M_3yrs_AMY	4.41e-111	6.03e-21	0.253156	3.12e-15	1.06e-07	4.19e-60	2.32e-154	0.126804	0.496217	0.266045
M_3yrs_VFC	3.07e-112	1.96e-22	0.20898	1.21e-15	1.34e-07	8.62e-62	3.67e-159	0.0990723	0.322366	0.171737
M_3yrs_DFC	3.43e-115	2.74e-22	0.123925	1.7e-15	1.67e-08	3.33e-62	5.04e-160	0.026393	0.310547	0.241944
M_3yrs_HIP	2.79e-110	8.48e-21	0.265693	4.4e-15	7.16e-07	2.57e-57	1.11e-147	0.149244	0.412321	0.0562015
M_3yrs_ITC	2.37e-112	3.57e-21	0.230682	3.96e-15	1.21e-07	5.24e-60	1.87e-151	0.0230073	0.286213	0.279576
M_4yrs_AMY	1.14e-107	1.72e-20	0.355878	1.92e-16	1.71e-08	2.05e-57	3.68e-151	0.0694885	0.222405	0.319443
M_4yrs_STR	4.21e-105	6.07e-20	0.356693	5.25e-16	2.64e-09	2.53e-57	6.92e-152	0.0692304	0.075951	0.277774
M_4yrs_VFC	1.21e-109	2.33e-20	0.382543	1.31e-15	2.7e-09	1.52e-57	6.12e-151	0.0701287	0.274177	0.245935
M_4yrs_DFC	2.31e-105	1.37e-19	0.201844	3.71e-15	1.15e-08	2.41e-57	2.47e-151	0.0462699	0.219734	0.142479
M_4yrs_STC	2.32e-107	7.49e-19	0.408874	3.16e-15	1.2e-08	5.93e-56	4.57e-146	0.0323335	0.163595	0.196973
M_4yrs_CBC	4.1e-103	4.45e-20	0.375454	8.43e-16	7.91e-07	2.29e-56	7.67e-141	0.0330858	0.22041	0.190746
M_4yrs_MD	1.68e-107	8.64e-20	0.172747	5.98e-16	1.56e-08	8.24e-54	1.44e-144	0.0425537	0.218965	0.220325
M_8yrs_ITC	6e-107	1.3e-18	0.189276	5.43e-16	1.27e-08	1.27e-54	4.58e-142	0.01532	0.154287	0.308246
M_8yrs_S1C	5.08e-107	1.73e-19	0.177639	2.65e-16	4.79e-09	3.25e-56	4.16e-145	0.0259951	0.193454	0.369967
M_8yrs_IPC	7.42e-108	5.72e-21	0.320275	2.21e-17	4.48e-09	6.3e-57	1.24e-148	0.0590083	0.144891	0.170874
M_8yrs_V1C	3.3e-110	2e-20	0.139369	4.49e-17	4.1e-09	7.74e-58	6.04e-148	0.0402084	0.125895	0.245669
M_8yrs_STC	4.43e-107	6.93e-19	0.204133	1.61e-15	3.69e-09	1.53e-55	3.82e-145	0.053956	0.249315	0.528953
M_8yrs_MD	1.86e-110	2.63e-20	0.253883	5.76e-17	3.16e-08	1.27e-54	1.9e-142	0.0669162	0.118548	0.193508
M_8yrs_VFC	3.06e-107	3.79e-19	0.211773	3.21e-16	2.38e-09	6.2e-57	6.21e-148	0.0461455	0.320664	0.258589
M_8yrs_HIP	2.71e-112	1.91e-20	0.224576	1.15e-16	5.28e-09	3.62e-57	3.12e-154	0.0617249	0.10979	0.206856
M_8yrs_AMY	7.79e-111	1.61e-19	0.170476	1.36e-16	5.02e-08	8.92e-57	3.24e-146	0.0706506	0.131619	0.138507
M_8yrs_M1C	3.2e-105	4.37e-19	0.376055	5.01e-16	6.94e-09	1.26e-55	1.82e-143	0.0538085	0.133505	0.241495
M_8yrs_CBC	7.87e-111	4.93e-23	0.330675	2.7e-16	1.32e-07	1.9e-60	3.89e-148	0.0318949	0.280428	0.105073
M_8yrs_DFC	3.7e-109	1.29e-20	0.254275	4.06e-16	6.61e-09	1.77e-56	6.15e-147	0.0801651	0.158235	0.241744
M_8yrs_STR	3.05e-103	2.76e-20	0.19885	3.69e-16	2.56e-09	2.22e-56	1.56e-146	0.0377172	0.234756	0.167513
M_8yrs_A1C	1.58e-108	8.7e-21	0.351988	1.01e-16	2.86e-09	5.84e-57	3.14e-149	0.0328657	0.200647	0.18625
M_8yrs_MFC	5.55e-107	4.54e-20	0.214757	4.85e-16	7.84e-09	1.72e-56	1.44e-143	0.0557252	0.122322	0.160657
M_8yrs_OFC	9.51e-113	3.34e-20	0.328574	1.52e-16	1.3e-09	9.32e-59	1.11e-148	0.0223602	0.0710172	0.349471
M_8yrs_MFC.1	2.81e-96	2.56e-18	0.504567	4.56e-14	1.58e-08	1.62e-46	9.73e-122	0.0375674	0.700789	0.111952
M_8yrs_CBC.1	1.53e-123	7.46e-23	0.247043	1.19e-16	2.44e-07	4.4e-64	2.2e-153	0.0406488	0.132439	0.0421239
M_8yrs_A1C.1	7.6e-124	7.25e-23	0.201687	9.9e-18	4.88e-10	3.27e-63	3.96e-160	0.0463903	0.218204	0.172707
M_8yrs_VFC.1	6e-123	7.69e-22	0.386838	3.26e-17	6.74e-11	6.75e-60	1.72e-155	0.036141	0.117906	0.0838167
M_8yrs_HIP.1	1.19e-113	1.44e-20	0.190941	3.03e-17	1.46e-09	6.12e-56	2.72e-145	0.0643172	0.0715178	0.106124
M_8yrs_AMY.1	8.91e-123	1.46e-21	0.483787	1.58e-17	3.36e-10	3.61e-61	9.55e-153	0.0519943	0.321175	0.24679
M_8yrs_V1C.1	3.07e-127	8.58e-23	0.313914	5.18e-18	1.96e-10	1.25e-62	2.58e-155	0.0195843	0.146094	0.0651723
M_8yrs_IPC.1	5.14e-123	3.23e-21	0.391839	6.01e-17	9.84e-10	1.75e-58	1.01e-149	0.0813145	0.353969	0.141428
M_8yrs_DFC.1	3.04e-105	2.77e-19	0.539314	1.09e-13	3.59e-08	2.33e-50	1.09e-124	0.0829005	0.302205	0.116784
M_8yrs_STC.1	5.11e-126	6.12e-23	0.239979	4.6e-18	6.17e-11	8.07e-62	4.16e-156	0.0289002	0.110516	0.238355
M_8yrs_ITC.1	7.73e-121	4.06e-21	0.192347	3.87e-17	1.4e-09	1.85e-57	7.72e-148	0.0255163	0.237777	0.133614
F_11yrs_VFC	2.39e-120	8.03e-21	0.123619	1.35e-17	4.57e-10	7.69e-59	2.35e-151	0.0390491	0.245203	0.0752426
F_11yrs_IPC	3e-112	2.9e-20	0.409809	1.9e-15	3.63e-10	6.79e-54	5.6e-139	0.0446385	0.148194	0.276813
F_11yrs_ITC	5.28e-111	5.96e-19	0.34966	2.53e-17	7.87e-10	1.18e-54	5.6e-141	0.0427754	0.329309	0.263164
F_11yrs_STC	4.59e-116	3.84e-21	0.189423	5.1e-17	1.59e-09	5.01e-58	1.17e-148	0.0295069	0.213972	0.334423
F_11yrs_S1C	1.19e-116	3.86e-20	0.158213	1.85e-17	1.65e-10	1.69e-57	6.14e-150	0.0442366	0.134021	0.112745
F_11yrs_DFC	4.45e-120	1.07e-21	0.280037	1.63e-16	2.25e-10	1.18e-59	8.93e-153	0.0335838	0.059254	0.191031
F_11yrs_AMY	1.3e-116	1.27e-20	0.29193	2.86e-16	1.94e-09	7.14e-57	9.01e-148	0.059323	0.0541932	0.0646351
F_11yrs_V1C	1.86e-119	8.21e-22	0.249419	1.28e-17	6.88e-10	1.03e-60	6.32e-152	0.0470652	0.101966	0.187699
F_11yrs_CBC	4.62e-117	1.63e-21	0.252498	8.19e-17	2.56e-06	1.18e-56	1.74e-140	0.0259581	0.116896	0.0179388
F_11yrs_A1C	6e-121	6.42e-21	0.296802	6.62e-17	2.19e-10	9.06e-58	1.14e-147	0.0196326	0.186809	0.134561
F_11yrs_HIP	9.69e-110	2.33e-19	0.208271	5.09e-17	8.24e-09	7.45e-54	5.27e-143	0.0537281	0.197213	0.381245
F_11yrs_M1C	7.13e-118	1.1e-21	0.127194	1.48e-17	2.68e-10	9.99e-59	1.37e-151	0.0612634	0.28232	0.286762
F_11yrs_OFC	1.66e-117	3.2e-20	0.276514	2.47e-17	3.05e-10	2.18e-57	1.07e-147	0.0331144	0.0781366	0.197167
F_11yrs_MFC	2.16e-117	1.05e-20	0.267633	5.13e-17	2.11e-10	8.47e-57	4.24e-148	0.0198329	0.0880453	0.190073
F_13yrs_MFC	3.59e-115	2.02e-21	0.355917	2.51e-16	8.98e-10	2.15e-58	3.32e-152	0.0427705	0.142604	0.0581701
F_13yrs_IPC	6.29e-117	9.98e-22	0.177222	2.81e-16	1.08e-09	6.26e-61	2.84e-154	0.0450391	0.102394	0.0518022
F_13yrs_VFC	1.53e-114	1.77e-21	0.336488	1.04e-16	2.24e-10	6.91e-60	8.06e-154	0.042019	0.151817	0.0934103
F_13yrs_A1C	1.32e-117	2.71e-21	0.212693	1.37e-16	8.5e-10	3.44e-59	1.18e-150	0.0463367	0.17038	0.0922967
F_13yrs_ITC	1.9e-116	6.02e-22	0.217048	3.55e-16	9.78e-10	5.09e-60	2.84e-154	0.077608	0.215336	0.0883903
F_13yrs_STC	2.44e-116	7.72e-22	0.327835	1.23e-16	5.86e-10	8.51e-61	2.08e-157	0.0987164	0.088702	0.143559
F_13yrs_CBC	5.33e-115	1.54e-22	0.258367	5.94e-16	3.33e-07	2.26e-60	1.69e-145	0.0353269	0.162595	0.101909
F_13yrs_V1C	1.08e-114	2.53e-22	0.328245	1.95e-16	4.02e-09	1.18e-60	1.29e-153	0.113978	0.154267	0.0855623
F_13yrs_S1C	1.58e-116	1.9e-21	0.45936	5.04e-16	5.06e-10	5.66e-59	1.61e-153	0.0525723	0.199313	0.151283
F_13yrs_DFC	3.68e-119	1.36e-21	0.182315	1.75e-16	4.24e-10	8.1e-61	8.32e-156	0.0761247	0.117241	0.197513
F_13yrs_OFC	3.06e-117	4.13e-22	0.348747	2.77e-16	6.63e-10	4.22e-60	2.27e-154	0.0641575	0.123005	0.170113
F_13yrs_MD	1.27e-108	4.1e-22	0.38816	6.71e-15	1.45e-07	2.45e-59	9.58e-155	0.0494644	0.21154	0.112003
F_13yrs_AMY	8.69e-113	2.08e-21	0.503316	4.88e-16	5.12e-09	1.8e-59	3.55e-153	0.0739301	0.143699	0.147345
F_13yrs_M1C	1.28e-118	3.46e-21	0.225338	8.79e-17	3.99e-10	3.64e-60	9.16e-155	0.0832755	0.186485	0.0938779
F_13yrs_HIP	1.2e-109	1.13e-20	0.251054	3.36e-15	2.33e-08	2.71e-58	1.2e-151	0.0615492	0.298611	0.103683
F_13yrs_STR	4.93e-110	3.3e-21	0.445359	5.05e-15	1.2e-08	1.03e-59	1.22e-154	0.0734139	0.0952714	0.169357
M_15yrs_IPC	1.47e-117	1.53e-20	0.243233	1.8e-17	8.09e-11	2.56e-56	7.69e-144	0.0873284	0.289216	0.343748
M_15yrs_CBC	2.21e-111	1.02e-20	0.281599	1.96e-16	1.34e-07	1.54e-59	4.97e-145	0.0181211	0.161647	0.101949
M_15yrs_STC	1.23e-117	3.77e-20	0.249831	1.67e-17	1.71e-10	2.46e-56	2.95e-141	0.0383288	0.158509	0.336435
M_15yrs_ITC	6.48e-118	2.57e-21	0.116859	4.24e-17	3.39e-10	3.3e-57	1.71e-145	0.0392903	0.127709	0.164428
M_15yrs_AMY	1.56e-118	4.14e-20	0.269476	3.72e-17	9.22e-10	4.09e-56	4.64e-146	0.0598864	0.220167	0.131452
M_18yrs_HIP	7.6e-111	8.87e-21	0.152627	1.88e-15	4.93e-07	1.13e-59	7.59e-154	0.0450403	0.237444	0.166367
M_18yrs_M1C	3.41e-110	1.35e-21	0.3733	5.23e-16	2.16e-08	5.91e-60	1.44e-156	0.144695	0.202145	0.0394146
M_18yrs_V1C	2.36e-112	4.79e-21	0.239484	3.89e-16	2.11e-08	3.42e-61	9.05e-156	0.0596014	0.136731	0.224466
M_18yrs_A1C	5.85e-110	4.13e-21	0.143711	4.44e-16	1.34e-07	2.2e-60	2.59e-156	0.0802294	0.539913	0.142949
M_18yrs_ITC	7.8e-114	6.83e-21	0.139899	1.62e-16	1.16e-08	9.09e-62	2.35e-154	0.053336	0.2582	0.149073
M_18yrs_VFC	7.53e-114	2.37e-21	0.223663	2.64e-16	2.37e-09	2.05e-60	1.73e-157	0.0770617	0.271706	0.168179
M_18yrs_MFC	1.02e-112	1.77e-21	0.0911946	3.01e-16	9.57e-08	1.46e-60	5.35e-155	0.077911	0.335248	0.0423504
M_18yrs_STC	2.97e-111	2.18e-21	0.166435	3.54e-16	8.44e-08	7.97e-62	1.22e-157	0.0841225	0.229841	0.221151
M_18yrs_DFC	2.63e-114	7.47e-21	0.155971	5.47e-17	1.76e-09	6.54e-58	9.82e-153	0.0286178	0.26128	0.110383
M_18yrs_S1C	6.55e-111	2.16e-22	0.260079	8.97e-16	2.43e-08	2.42e-62	3.39e-160	0.165719	0.371897	0.0748579
M_18yrs_IPC	6.18e-113	2.48e-22	0.236457	1.86e-16	4.2e-09	2.26e-61	1.8e-160	0.0123976	0.204492	0.182263
M_18yrs_OFC	1.99e-112	5.78e-21	0.246488	7.33e-17	2.37e-09	9.68e-61	1.29e-158	0.108408	0.469134	0.206753
M_18yrs_CBC	2.2e-111	9.35e-23	0.343075	3.15e-16	3.18e-07	7.16e-62	2.22e-153	0.0452737	0.114557	0.0918992
F_19yrs_STC	2.57e-122	2.05e-23	0.0762165	7.16e-18	2.42e-10	1.2e-60	2.84e-154	0.0535696	0.133511	0.185833
F_19yrs_CBC	2.51e-118	1.65e-23	0.230149	4.1e-17	1.57e-07	9.37e-62	2.3e-151	0.0670446	0.151203	0.0572668
F_19yrs_DFC	3.82e-121	1.47e-22	0.14023	2.53e-17	1.43e-10	4.55e-61	3.02e-156	0.0355344	0.0863881	0.13473
F_19yrs_AMY	4.34e-118	1.02e-22	0.125657	7.78e-17	2.27e-09	2.15e-62	6.04e-162	0.0321337	0.146173	0.224601
F_19yrs_OFC	5.33e-121	2.83e-22	0.24685	4.07e-17	1.81e-10	2.29e-62	8.69e-158	0.0363415	0.113204	0.160194
F_19yrs_ITC	3.76e-119	3.75e-22	0.120564	4.53e-17	5.97e-10	6.42e-62	7.59e-159	0.0670666	0.261414	0.144955
F_19yrs_STR	3.23e-116	3.46e-22	0.318394	1.02e-16	2.47e-09	4.3e-56	9.23e-148	0.081677	0.0557836	0.105499
F_19yrs_S1C	1.25e-120	9.33e-22	0.186961	5.29e-18	2.97e-10	1.62e-59	1.09e-153	0.0788579	0.153371	0.136579
F_19yrs_M1C	9.32e-120	1.71e-22	0.20695	3e-17	2.84e-10	1.27e-61	1.07e-158	0.137054	0.106194	0.0550839
F_19yrs_HIP	4.51e-119	5.3e-24	0.148265	1.18e-16	9.29e-10	1.07e-59	2.66e-155	0.0520953	0.232787	0.131823
F_19yrs_A1C	9.41e-123	2.35e-22	0.0946295	1.68e-18	1.17e-10	1.8e-59	6.08e-151	0.0987676	0.0411381	0.104766
F_19yrs_V1C	2.75e-121	1.03e-23	0.190305	6.14e-18	6.37e-10	3.38e-62	1.16e-158	0.0544562	0.109791	0.112745
F_19yrs_IPC	1e-122	4.27e-22	0.225684	8.3e-18	1.45e-10	2.52e-60	2.41e-151	0.121934	0.0631756	0.0562699
F_19yrs_VFC	5.51e-122	8.48e-23	0.250703	1.99e-16	7.14e-10	5.8e-63	2.13e-161	0.048261	0.0752344	0.131837
F_19yrs_MFC	1.54e-119	2.61e-22	0.13476	3.04e-17	2.27e-10	2.78e-59	7.57e-151	0.072053	0.216959	0.133906
F_19yrs_MD	4.35e-117	7.66e-23	0.195888	5.29e-17	8.84e-08	2.64e-57	6.74e-148	0.0445379	0.0981783	0.0667028
F_21yrs_MFC	1.07e-123	3.95e-22	0.255101	1.1e-16	6.62e-10	3.41e-60	8.41e-153	0.0295862	0.167217	0.172161
F_21yrs_M1C	2.17e-124	5.59e-22	0.2293	2.28e-17	3.54e-10	1.26e-59	3.8e-153	0.0920162	0.143959	0.153267
F_21yrs_A1C	3.94e-122	6.64e-21	0.13671	1.93e-17	1.9e-10	1.66e-59	2.02e-149	0.0514649	0.148695	0.149587
F_21yrs_DFC	3.39e-123	2.67e-22	0.382576	1.29e-17	3.92e-10	9.05e-62	2.53e-154	0.032192	0.223251	0.144993
F_21yrs_AMY	1.56e-118	2.37e-21	0.388816	6.12e-17	1.91e-10	1.18e-57	2.26e-148	0.0216091	0.153798	0.306001
F_21yrs_MD	2.89e-115	2.31e-21	0.111166	3.62e-17	3.4e-07	5.41e-57	8.17e-144	0.0388141	0.141283	0.157026
F_21yrs_V1C	2.44e-122	2.78e-21	0.111559	5.48e-18	1.84e-10	1.05e-59	1.33e-150	0.0695021	0.0601096	0.18352
F_21yrs_STC	1.66e-122	4.17e-22	0.241842	3.47e-17	1.02e-10	1.92e-60	4.54e-152	0.0369296	0.211684	0.182598
F_21yrs_VFC	8.37e-124	6.46e-22	0.362604	2.17e-17	9.69e-11	1.06e-60	2.75e-149	0.0409628	0.0993607	0.147157
F_21yrs_CBC	3.72e-120	9.67e-23	0.301462	7.36e-17	3.32e-07	2.51e-61	7.17e-146	0.0320159	0.24389	0.014073
F_21yrs_S1C	2.44e-124	1.86e-22	0.138239	1.87e-17	1.47e-10	8.56e-61	3.01e-150	0.0278738	0.131581	0.165082
F_21yrs_ITC	8.44e-120	1.27e-20	0.486292	2.08e-16	2.27e-10	2.99e-58	7.76e-148	0.0268434	0.242065	0.155735
F_21yrs_IPC	9.06e-123	3.97e-21	0.305193	3.59e-17	1.41e-10	6.55e-59	3.1e-149	0.0365034	0.0917102	0.129836
F_21yrs_HIP	5.68e-116	4.84e-21	0.236211	3.7e-16	8.53e-10	1.03e-58	3.63e-149	0.0865353	0.148491	0.220529
F_21yrs_STR	1.98e-114	2.4e-21	0.357119	9.88e-17	1.1e-09	3.24e-61	2.17e-155	0.0454363	0.119323	0.176512
F_21yrs_OFC	1.07e-119	1.75e-20	0.310247	1.92e-17	1.25e-10	3.44e-58	7.98e-147	0.0341241	0.10152	0.253687
M_23yrs_ITC	7.94e-115	2.53e-20	0.224353	9.02e-16	1.25e-09	8.43e-58	2.22e-150	0.046733	0.200762	0.161609
M_23yrs_AMY	2.63e-111	5.17e-21	0.312064	5.84e-15	4.18e-08	5.99e-58	5.17e-151	0.0933646	0.102999	0.130926
M_23yrs_OFC	5.06e-114	6e-20	0.351515	1.66e-15	7.37e-10	2.32e-58	1.18e-152	0.0722413	0.209528	0.103609
M_23yrs_MD	3.86e-109	1.53e-21	0.334793	2.26e-15	2.99e-07	8.87e-57	4.61e-150	0.0424915	0.113084	0.0887559
M_23yrs_STC	3.91e-116	2.36e-20	0.204347	1.16e-15	2.08e-09	7.19e-60	3.45e-150	0.0623768	0.168998	0.30586
M_23yrs_VFC	2.65e-116	4.34e-21	0.381927	6.62e-16	6.35e-10	1.03e-59	8.03e-153	0.0682873	0.253786	0.17246
M_23yrs_MFC	5.14e-115	5.77e-20	0.423367	5.92e-16	6.65e-10	3.8e-58	1.15e-148	0.026085	0.182807	0.126657
M_23yrs_M1C	1.55e-115	1.1e-20	0.33193	1.5e-15	5.8e-10	1.04e-59	6.12e-152	0.0274747	0.120972	0.1381
M_23yrs_HIP	1.8e-112	3.02e-21	0.406534	4.71e-16	6.52e-09	7.25e-58	4.06e-151	0.11206	0.176389	0.0801052
M_23yrs_CBC	3.67e-113	3.27e-21	0.386513	1.42e-15	3.88e-07	2.68e-61	1.83e-148	0.0314727	0.0891516	0.124478
M_23yrs_S1C	9.49e-112	1.16e-19	0.328462	8.46e-16	4.83e-10	1.46e-58	2.52e-149	0.0968987	0.143535	0.0928198
M_23yrs_A1C	1.04e-115	2.11e-20	0.505256	1.49e-15	1.67e-09	7.79e-60	1.15e-150	0.0491749	0.244452	0.137572
M_23yrs_IPC	1.65e-115	4.08e-21	0.294824	7.8e-16	1.15e-09	4.84e-58	2.45e-150	0.0440299	0.118507	0.107283
M_23yrs_STR	3.11e-107	1.87e-20	0.566767	8.54e-15	3.28e-08	1.73e-57	5.51e-153	0.087041	0.216164	0.0940812
F_30yrs_ITC	6.8e-118	2.01e-22	0.479236	1.98e-16	2.71e-10	2.91e-62	9.45e-161	0.0698734	0.186081	0.190132
F_30yrs_STR	1.96e-111	2.85e-22	0.223735	1.29e-16	1.46e-09	9.09e-63	6.71e-161	0.095462	0.129658	0.12755
F_30yrs_MFC	8.59e-120	8.95e-23	0.417616	8.7e-17	2.03e-10	1.08e-62	6.34e-159	0.0854893	0.118201	0.169822
F_30yrs_OFC	1.53e-119	1.72e-22	0.297165	5.99e-17	3.06e-10	1.78e-63	1.79e-163	0.0452118	0.23281	0.168477
F_30yrs_IPC	1.06e-121	8.44e-23	0.301002	1.81e-16	2.72e-10	4.13e-63	8.28e-161	0.0421852	0.125798	0.0746089
F_30yrs_STC	3.91e-120	7.05e-23	0.382507	3.16e-17	2.36e-10	2.21e-62	3.86e-157	0.0436269	0.107965	0.178704
F_30yrs_S1C	1.71e-120	4.37e-23	0.409259	5.07e-17	3.22e-10	1.05e-63	1.04e-159	0.0297224	0.0493744	0.145019
F_30yrs_MD	9.3e-115	6.64e-22	0.214405	7.56e-18	2.95e-08	1.26e-58	1.36e-156	0.0532626	0.290008	0.0401436
F_30yrs_HIP	4.81e-118	8.49e-23	0.310588	3.3e-17	2.94e-09	1.21e-62	1.48e-162	0.0693004	0.117576	0.0665929
F_30yrs_A1C	5.55e-117	5.43e-23	0.256068	7.96e-17	1e-09	1.82e-64	1.48e-165	0.053912	0.142301	0.11707
F_30yrs_V1C	5.14e-121	1.65e-23	0.243572	1.07e-17	1.01e-09	1.26e-63	2.36e-162	0.0180168	0.0699057	0.140921
F_30yrs_DFC	6.4e-118	9.36e-22	0.280774	7.99e-17	1.22e-10	1.75e-61	1.03e-155	0.0287263	0.100577	0.15311
F_30yrs_AMY	2.11e-114	2.37e-21	0.348938	3.11e-17	2.54e-09	5.68e-60	2.17e-155	0.0427293	0.110923	0.154707
F_30yrs_M1C	2.82e-120	2.21e-22	0.262973	9.34e-18	3.13e-10	1.89e-62	1.03e-160	0.0416309	0.0963001	0.147995
F_30yrs_VFC	2.37e-117	4.95e-23	0.421959	3.88e-16	9.28e-10	1.05e-64	1.16e-162	0.0439316	0.185971	0.157569
F_30yrs_CBC	2.9e-116	3.15e-22	0.423314	8.48e-17	4.88e-07	8.45e-63	3.44e-155	0.0533824	0.180453	0.0247299
M_36yrs_M1C	1.34e-117	3.37e-22	0.0989426	4.4e-17	5.24e-10	5.19e-60	8.79e-156	0.0157413	0.108654	0.131577
M_36yrs_STC	1.47e-117	5.07e-22	0.163604	2.62e-17	1.82e-10	1.79e-59	1.33e-152	0.028871	0.154038	0.179375
M_36yrs_MFC	1.68e-116	2.81e-21	0.11483	2.54e-17	8.63e-10	7.33e-59	5.15e-151	0.038159	0.127838	0.123561
M_36yrs_ITC	6.49e-117	5.97e-21	0.297396	4.07e-17	5.68e-10	1.23e-58	2.83e-151	0.0603091	0.110204	0.370108
M_36yrs_IPC	4.29e-119	8.08e-22	0.140219	4.54e-17	6.19e-10	1.82e-59	7.51e-152	0.0669018	0.193986	0.13439
M_36yrs_AMY	2.05e-117	7.09e-22	0.318501	2.26e-16	3.88e-09	2.91e-60	1.39e-153	0.0775959	0.21288	0.0819494
M_36yrs_OFC	4.16e-119	7.65e-22	0.0946022	2.01e-17	3.01e-10	4.63e-57	2.58e-149	0.0350164	0.0677196	0.103469
M_36yrs_VFC	8.47e-119	2.18e-21	0.145751	2.39e-17	7.51e-10	1.77e-57	4.17e-148	0.0358684	0.161937	0.0958263
M_36yrs_DFC	1.21e-120	2.61e-21	0.290532	9.95e-18	1.03e-10	2.27e-57	1.12e-148	0.0385675	0.13441	0.152893
M_36yrs_A1C	1.4e-119	1.23e-21	0.249559	1.52e-17	7.59e-10	9.68e-58	7.07e-149	0.0377326	0.144183	0.127156
M_36yrs_V1C	4.36e-120	8.17e-22	0.131309	4.18e-18	3.18e-10	7.06e-59	8.52e-151	0.0550128	0.165927	0.0893865
M_36yrs_CBC	7.02e-116	1.47e-22	0.26824	4.59e-17	2.1e-07	4.54e-60	5.2e-150	0.0265489	0.127579	0.0417848
M_36yrs_S1C	2.07e-118	2.98e-22	0.235252	9.74e-18	5.75e-10	1.25e-57	7.09e-150	0.0173917	0.164876	0.130112
M_36yrs_HIP	3.02e-115	7.31e-22	0.358404	4.75e-17	2.47e-09	5.49e-58	5.33e-151	0.0652431	0.198459	0.121257
M_36yrs_STR	6.07e-112	4.13e-21	0.33506	1.43e-16	1.4e-09	3.62e-60	5.85e-154	0.0495816	0.0683342	0.303034
M_36yrs_MD	1.15e-114	4.14e-23	0.175446	4.14e-17	7.96e-08	1.21e-55	8.13e-149	0.0600533	0.161896	0.129554
M_37yrs_S1C	3.23e-119	6.3e-23	0.232839	7.32e-17	9.01e-10	8.24e-60	5.96e-158	0.0437681	0.0478731	0.0758695
M_37yrs_V1C	2.3e-117	2.86e-21	0.139589	6.58e-17	3.44e-09	3.92e-60	5.94e-152	0.0331499	0.0618937	0.0598275
M_37yrs_CBC	1.81e-105	4.19e-20	0.358357	1.24e-15	2.47e-07	6.39e-58	2.04e-144	0.0504042	0.119245	0.126316
M_37yrs_HIP	8.45e-117	3.3e-21	0.179979	2.31e-16	1.66e-09	3.72e-56	3.39e-147	0.0414296	0.0560101	0.0584846
M_37yrs_IPC	7.43e-115	8.11e-21	0.175063	6.35e-17	4.79e-10	1.47e-58	1.4e-151	0.0292359	0.111347	0.141553
M_37yrs_MD	1.62e-117	3.72e-22	0.107159	9.3e-17	6.57e-08	2.2e-55	5.02e-148	0.0239525	0.0778528	0.103887
M_37yrs_DFC	6.22e-121	3.43e-22	0.297849	7.46e-17	5.24e-10	7.72e-57	3.6e-146	0.102083	0.132871	0.0445333
M_37yrs_VFC	2.23e-119	6.1e-22	0.177721	3.52e-17	5.95e-10	6.71e-59	2.19e-152	0.135205	0.117774	0.134739
M_37yrs_ITC	8.24e-115	9.42e-21	0.172642	1.55e-16	6.03e-10	7.08e-56	7.05e-146	0.0696211	0.101167	0.0893962
M_37yrs_A1C	8.81e-120	7.14e-22	0.169768	9.11e-17	3.38e-10	1.9e-58	7.6e-151	0.0449848	0.0575504	0.133537
M_37yrs_M1C	6.12e-120	2.69e-22	0.169371	6.92e-17	6.35e-10	4.24e-59	1.66e-151	0.0729805	0.0464846	0.0959412
M_37yrs_OFC	7.43e-120	1.06e-22	0.171587	1.87e-16	7.03e-10	2.16e-59	8.88e-154	0.04192	0.0579956	0.130726
M_37yrs_STR	4.54e-111	6.33e-22	0.350435	6.37e-16	8.3e-09	2.32e-58	2.3e-153	0.050996	0.103063	0.0582753
M_37yrs_STC	6.19e-122	6.95e-24	0.241378	9.23e-17	3.74e-10	6.89e-62	1.97e-158	0.0301585	0.0895715	0.14981
M_37yrs_AMY	7.2e-115	4.9e-21	0.392413	2.8e-16	4.11e-09	5.52e-58	2.68e-151	0.0188944	0.193981	0.0757062
M_37yrs_MFC	5.16e-119	2.94e-20	0.161877	7.46e-17	3.78e-10	3.3e-53	1.84e-135	0.0495069	0.0995216	0.0439892
F_40yrs_DFC	1.93e-110	1.02e-19	0.130263	2.94e-16	4.62e-10	1.58e-59	1.42e-147	0.042527	0.148065	0.10536
F_40yrs_ITC	1.89e-112	9.55e-21	0.254989	1.95e-16	9.64e-10	2.44e-56	1.29e-144	0.0542672	0.116242	0.17499
F_40yrs_VFC	2.38e-117	2.2e-20	0.118251	3.99e-17	2.27e-10	1.3e-58	1.78e-145	0.0282699	0.106868	0.104087
F_40yrs_MD	2.14e-109	4.29e-20	0.150335	1.16e-15	1.02e-07	3.07e-56	5.36e-145	0.0960588	0.0526201	0.292129
F_40yrs_AMY	1.09e-107	2.29e-19	0.192528	7.07e-16	3.7e-09	2.88e-57	1.82e-146	0.0240512	0.0851625	0.334466
F_40yrs_A1C	1.89e-110	9e-21	0.231136	7.11e-16	1.99e-09	8.91e-62	9.56e-154	0.0209335	0.169287	0.196248
F_40yrs_CBC	1.96e-109	1.65e-21	0.388807	6.58e-17	1.97e-06	9.25e-61	1.2e-151	0.0251832	0.353928	0.179107
F_40yrs_V1C	1.34e-116	1.45e-21	0.199321	2.31e-17	1.25e-09	2.41e-60	2.5e-151	0.0549001	0.0529991	0.126452
F_40yrs_OFC	1.96e-117	1.34e-20	0.11256	5.41e-17	4.96e-10	4.77e-58	1.4e-144	0.0151243	0.0880721	0.210141
F_40yrs_STC	7e-117	1.69e-20	0.111747	2.76e-17	3.53e-10	2.28e-58	5.38e-147	0.0328861	0.138585	0.136306
F_40yrs_IPC	2.33e-118	6.11e-21	0.109367	4.75e-17	1.71e-10	2.56e-59	5.43e-145	0.0496941	0.0647723	0.121435
F_40yrs_M1C	1.85e-108	3.85e-20	0.10319	2.12e-16	1.06e-09	2.49e-61	1.42e-153	0.0570823	0.12012	0.284663
F_40yrs_HIP	1.66e-108	5.82e-19	0.179318	2.07e-15	3.19e-09	2.3e-57	1.93e-146	0.0222504	0.0591087	0.268012
F_40yrs_STR	1.93e-110	2.25e-21	0.287514	9.59e-16	4.33e-09	1.47e-59	5.13e-150	0.0770464	0.0694323	0.245979
F_40yrs_S1C	2.53e-109	2.96e-19	0.119971	3.83e-16	8.02e-10	1.51e-59	5.93e-149	0.0488863	0.206053	0.227302
