# Supplementary material for: Spatiotemporal Brain Transcriptomics Reveal Risk Gene Hot-Spots in Major Neuropsychiatric Disorders
Source: Research Square preprint supplement (doi:10.21203/rs.3.rs-7667905/v1), 2025-10-08
Supplement: Supplementary file 2 [file Supplemental Table 10. Data supporting Fig. S4b, The 41 WGCNA based co-expression modules.xlsx]

## Sheet: 41 co-expression modules
	moduleLables	moduleColors	black	blue	brown	cyan	darkgreen	darkgrey	darkmagenta	darkolivegreen	darkorange	darkred	darkturquoise	green	greenyellow	grey	grey60	lightcyan	lightgreen	lightyellow	magenta	mediumpurple3	midnightblue	orange	orangered4	paleturquoise	pink	plum1	purple	red	royalblue	saddlebrown	salmon	sienna3	skyblue	skyblue3	steelblue	tan	turquoise	violet	white	yellow	yellowgreen
MARCHF1	26	darkorange	0	0	0	0	0	0	0	0	1	0	0	0	0	0	0	0	0	0	0	0	0	0	0	0	0	0	0	0	0	0	0	0	0	0	0	0	0	0	0	0	0
SEPTIN1	8	pink	0	0	0	0	0	0	0	0	0	0	0	0	0	0	0	0	0	0	0	0	0	0	0	0	1	0	0	0	0	0	0	0	0	0	0	0	0	0	0	0	0
MARCHF10	20	royalblue	0	0	0	0	0	0	0	0	0	0	0	0	0	0	0	0	0	0	0	0	0	0	0	0	0	0	0	0	1	0	0	0	0	0	0	0	0	0	0	0	0
SEPTIN10	4	yellow	0	0	0	0	0	0	0	0	0	0	0	0	0	0	0	0	0	0	0	0	0	0	0	0	0	0	0	0	0	0	0	0	0	0	0	0	0	0	0	1	0
MARCHF11	1	turquoise	0	0	0	0	0	0	0	0	0	0	0	0	0	0	0	0	0	0	0	0	0	0	0	0	0	0	0	0	0	0	0	0	0	0	0	0	1	0	0	0	0
SEPTIN11	1	turquoise	0	0	0	0	0	0	0	0	0	0	0	0	0	0	0	0	0	0	0	0	0	0	0	0	0	0	0	0	0	0	0	0	0	0	0	0	1	0	0	0	0
SEPTIN12	7	black	1	0	0	0	0	0	0	0	0	0	0	0	0	0	0	0	0	0	0	0	0	0	0	0	0	0	0	0	0	0	0	0	0	0	0	0	0	0	0	0	0
MARCHF2	6	red	0	0	0	0	0	0	0	0	0	0	0	0	0	0	0	0	0	0	0	0	0	0	0	0	0	0	0	1	0	0	0	0	0	0	0	0	0	0	0	0	0
SEPTIN2	16	lightcyan	0	0	0	0	0	0	0	0	0	0	0	0	0	0	0	1	0	0	0	0	0	0	0	0	0	0	0	0	0	0	0	0	0	0	0	0	0	0	0	0	0
MARCHF3	22	darkgreen	0	0	0	0	1	0	0	0	0	0	0	0	0	0	0	0	0	0	0	0	0	0	0	0	0	0	0	0	0	0	0	0	0	0	0	0	0	0	0	0	0
SEPTIN3	1	turquoise	0	0	0	0	0	0	0	0	0	0	0	0	0	0	0	0	0	0	0	0	0	0	0	0	0	0	0	0	0	0	0	0	0	0	0	0	1	0	0	0	0
MARCHF4	1	turquoise	0	0	0	0	0	0	0	0	0	0	0	0	0	0	0	0	0	0	0	0	0	0	0	0	0	0	0	0	0	0	0	0	0	0	0	0	1	0	0	0	0
SEPTIN4	12	tan	0	0	0	0	0	0	0	0	0	0	0	0	0	0	0	0	0	0	0	0	0	0	0	0	0	0	0	0	0	0	0	0	0	0	0	1	0	0	0	0	0
MARCHF5	5	green	0	0	0	0	0	0	0	0	0	0	0	1	0	0	0	0	0	0	0	0	0	0	0	0	0	0	0	0	0	0	0	0	0	0	0	0	0	0	0	0	0
SEPTIN5	2	blue	0	1	0	0	0	0	0	0	0	0	0	0	0	0	0	0	0	0	0	0	0	0	0	0	0	0	0	0	0	0	0	0	0	0	0	0	0	0	0	0	0
MARCHF6	8	pink	0	0	0	0	0	0	0	0	0	0	0	0	0	0	0	0	0	0	0	0	0	0	0	0	1	0	0	0	0	0	0	0	0	0	0	0	0	0	0	0	0
SEPTIN6	5	green	0	0	0	0	0	0	0	0	0	0	0	1	0	0	0	0	0	0	0	0	0	0	0	0	0	0	0	0	0	0	0	0	0	0	0	0	0	0	0	0	0
MARCHF7	5	green	0	0	0	0	0	0	0	0	0	0	0	1	0	0	0	0	0	0	0	0	0	0	0	0	0	0	0	0	0	0	0	0	0	0	0	0	0	0	0	0	0
SEPTIN7	9	magenta	0	0	0	0	0	0	0	0	0	0	0	0	0	0	0	0	0	0	1	0	0	0	0	0	0	0	0	0	0	0	0	0	0	0	0	0	0	0	0	0	0
MARCHF8	1	turquoise	0	0	0	0	0	0	0	0	0	0	0	0	0	0	0	0	0	0	0	0	0	0	0	0	0	0	0	0	0	0	0	0	0	0	0	0	1	0	0	0	0
SEPTIN8	12	tan	0	0	0	0	0	0	0	0	0	0	0	0	0	0	0	0	0	0	0	0	0	0	0	0	0	0	0	0	0	0	0	0	0	0	0	1	0	0	0	0	0
MARCHF9	9	magenta	0	0	0	0	0	0	0	0	0	0	0	0	0	0	0	0	0	0	1	0	0	0	0	0	0	0	0	0	0	0	0	0	0	0	0	0	0	0	0	0	0
SEPTIN9	4	yellow	0	0	0	0	0	0	0	0	0	0	0	0	0	0	0	0	0	0	0	0	0	0	0	0	0	0	0	0	0	0	0	0	0	0	0	0	0	0	0	1	0
A1BG	14	cyan	0	0	0	1	0	0	0	0	0	0	0	0	0	0	0	0	0	0	0	0	0	0	0	0	0	0	0	0	0	0	0	0	0	0	0	0	0	0	0	0	0
A2LD1	3	brown	0	0	1	0	0	0	0	0	0	0	0	0	0	0	0	0	0	0	0	0	0	0	0	0	0	0	0	0	0	0	0	0	0	0	0	0	0	0	0	0	0
A2M	3	brown	0	0	1	0	0	0	0	0	0	0	0	0	0	0	0	0	0	0	0	0	0	0	0	0	0	0	0	0	0	0	0	0	0	0	0	0	0	0	0	0	0
A2ML1	3	brown	0	0	1	0	0	0	0	0	0	0	0	0	0	0	0	0	0	0	0	0	0	0	0	0	0	0	0	0	0	0	0	0	0	0	0	0	0	0	0	0	0
A2ML1-AS1	5	green	0	0	0	0	0	0	0	0	0	0	0	1	0	0	0	0	0	0	0	0	0	0	0	0	0	0	0	0	0	0	0	0	0	0	0	0	0	0	0	0	0
A4GALT	3	brown	0	0	1	0	0	0	0	0	0	0	0	0	0	0	0	0	0	0	0	0	0	0	0	0	0	0	0	0	0	0	0	0	0	0	0	0	0	0	0	0	0
AAAS	1	turquoise	0	0	0	0	0	0	0	0	0	0	0	0	0	0	0	0	0	0	0	0	0	0	0	0	0	0	0	0	0	0	0	0	0	0	0	0	1	0	0	0	0
AACS	2	blue	0	1	0	0	0	0	0	0	0	0	0	0	0	0	0	0	0	0	0	0	0	0	0	0	0	0	0	0	0	0	0	0	0	0	0	0	0	0	0	0	0
AADAT	2	blue	0	1	0	0	0	0	0	0	0	0	0	0	0	0	0	0	0	0	0	0	0	0	0	0	0	0	0	0	0	0	0	0	0	0	0	0	0	0	0	0	0
AAGAB	2	blue	0	1	0	0	0	0	0	0	0	0	0	0	0	0	0	0	0	0	0	0	0	0	0	0	0	0	0	0	0	0	0	0	0	0	0	0	0	0	0	0	0
AAK1	19	lightyellow	0	0	0	0	0	0	0	0	0	0	0	0	0	0	0	0	0	1	0	0	0	0	0	0	0	0	0	0	0	0	0	0	0	0	0	0	0	0	0	0	0
AAMP	21	darkred	0	0	0	0	0	0	0	0	0	1	0	0	0	0	0	0	0	0	0	0	0	0	0	0	0	0	0	0	0	0	0	0	0	0	0	0	0	0	0	0	0
AANAT	13	salmon	0	0	0	0	0	0	0	0	0	0	0	0	0	0	0	0	0	0	0	0	0	0	0	0	0	0	0	0	0	0	1	0	0	0	0	0	0	0	0	0	0
AARS	2	blue	0	1	0	0	0	0	0	0	0	0	0	0	0	0	0	0	0	0	0	0	0	0	0	0	0	0	0	0	0	0	0	0	0	0	0	0	0	0	0	0	0
AARS2	21	darkred	0	0	0	0	0	0	0	0	0	1	0	0	0	0	0	0	0	0	0	0	0	0	0	0	0	0	0	0	0	0	0	0	0	0	0	0	0	0	0	0	0
AARSD1	3	brown	0	0	1	0	0	0	0	0	0	0	0	0	0	0	0	0	0	0	0	0	0	0	0	0	0	0	0	0	0	0	0	0	0	0	0	0	0	0	0	0	0
AASDH	1	turquoise	0	0	0	0	0	0	0	0	0	0	0	0	0	0	0	0	0	0	0	0	0	0	0	0	0	0	0	0	0	0	0	0	0	0	0	0	1	0	0	0	0
AASDHPPT	8	pink	0	0	0	0	0	0	0	0	0	0	0	0	0	0	0	0	0	0	0	0	0	0	0	0	1	0	0	0	0	0	0	0	0	0	0	0	0	0	0	0	0
AASS	16	lightcyan	0	0	0	0	0	0	0	0	0	0	0	0	0	0	0	1	0	0	0	0	0	0	0	0	0	0	0	0	0	0	0	0	0	0	0	0	0	0	0	0	0
AATF	1	turquoise	0	0	0	0	0	0	0	0	0	0	0	0	0	0	0	0	0	0	0	0	0	0	0	0	0	0	0	0	0	0	0	0	0	0	0	0	1	0	0	0	0
AATK	12	tan	0	0	0	0	0	0	0	0	0	0	0	0	0	0	0	0	0	0	0	0	0	0	0	0	0	0	0	0	0	0	0	0	0	0	0	1	0	0	0	0	0
AB015752.3	1	turquoise	0	0	0	0	0	0	0	0	0	0	0	0	0	0	0	0	0	0	0	0	0	0	0	0	0	0	0	0	0	0	0	0	0	0	0	0	1	0	0	0	0
AB019439.68	23	darkturquoise	0	0	0	0	0	0	0	0	0	0	1	0	0	0	0	0	0	0	0	0	0	0	0	0	0	0	0	0	0	0	0	0	0	0	0	0	0	0	0	0	0
AB019441.29	10	purple	0	0	0	0	0	0	0	0	0	0	0	0	0	0	0	0	0	0	0	0	0	0	0	0	0	0	1	0	0	0	0	0	0	0	0	0	0	0	0	0	0
ABAT	3	brown	0	0	1	0	0	0	0	0	0	0	0	0	0	0	0	0	0	0	0	0	0	0	0	0	0	0	0	0	0	0	0	0	0	0	0	0	0	0	0	0	0
ABC11-48400900C8.1	0	grey	0	0	0	0	0	0	0	0	0	0	0	0	0	1	0	0	0	0	0	0	0	0	0	0	0	0	0	0	0	0	0	0	0	0	0	0	0	0	0	0	0
ABC7-42389800N19.1	7	black	1	0	0	0	0	0	0	0	0	0	0	0	0	0	0	0	0	0	0	0	0	0	0	0	0	0	0	0	0	0	0	0	0	0	0	0	0	0	0	0	0
ABCA1	1	turquoise	0	0	0	0	0	0	0	0	0	0	0	0	0	0	0	0	0	0	0	0	0	0	0	0	0	0	0	0	0	0	0	0	0	0	0	0	1	0	0	0	0
ABCA11P	1	turquoise	0	0	0	0	0	0	0	0	0	0	0	0	0	0	0	0	0	0	0	0	0	0	0	0	0	0	0	0	0	0	0	0	0	0	0	0	1	0	0	0	0
ABCA17P	1	turquoise	0	0	0	0	0	0	0	0	0	0	0	0	0	0	0	0	0	0	0	0	0	0	0	0	0	0	0	0	0	0	0	0	0	0	0	0	1	0	0	0	0
ABCA2	12	tan	0	0	0	0	0	0	0	0	0	0	0	0	0	0	0	0	0	0	0	0	0	0	0	0	0	0	0	0	0	0	0	0	0	0	0	1	0	0	0	0	0
ABCA3	21	darkred	0	0	0	0	0	0	0	0	0	1	0	0	0	0	0	0	0	0	0	0	0	0	0	0	0	0	0	0	0	0	0	0	0	0	0	0	0	0	0	0	0
ABCA4	31	paleturquoise	0	0	0	0	0	0	0	0	0	0	0	0	0	0	0	0	0	0	0	0	0	0	0	1	0	0	0	0	0	0	0	0	0	0	0	0	0	0	0	0	0
ABCA5	2	blue	0	1	0	0	0	0	0	0	0	0	0	0	0	0	0	0	0	0	0	0	0	0	0	0	0	0	0	0	0	0	0	0	0	0	0	0	0	0	0	0	0
ABCA6	12	tan	0	0	0	0	0	0	0	0	0	0	0	0	0	0	0	0	0	0	0	0	0	0	0	0	0	0	0	0	0	0	0	0	0	0	0	1	0	0	0	0	0
ABCA7	2	blue	0	1	0	0	0	0	0	0	0	0	0	0	0	0	0	0	0	0	0	0	0	0	0	0	0	0	0	0	0	0	0	0	0	0	0	0	0	0	0	0	0
ABCA8	12	tan	0	0	0	0	0	0	0	0	0	0	0	0	0	0	0	0	0	0	0	0	0	0	0	0	0	0	0	0	0	0	0	0	0	0	0	1	0	0	0	0	0
ABCA9	15	midnightblue	0	0	0	0	0	0	0	0	0	0	0	0	0	0	0	0	0	0	0	0	1	0	0	0	0	0	0	0	0	0	0	0	0	0	0	0	0	0	0	0	0
ABCA9-AS1	15	midnightblue	0	0	0	0	0	0	0	0	0	0	0	0	0	0	0	0	0	0	0	0	1	0	0	0	0	0	0	0	0	0	0	0	0	0	0	0	0	0	0	0	0
ABCB1	3	brown	0	0	1	0	0	0	0	0	0	0	0	0	0	0	0	0	0	0	0	0	0	0	0	0	0	0	0	0	0	0	0	0	0	0	0	0	0	0	0	0	0
ABCB10	4	yellow	0	0	0	0	0	0	0	0	0	0	0	0	0	0	0	0	0	0	0	0	0	0	0	0	0	0	0	0	0	0	0	0	0	0	0	0	0	0	0	1	0
ABCB10P1	23	darkturquoise	0	0	0	0	0	0	0	0	0	0	1	0	0	0	0	0	0	0	0	0	0	0	0	0	0	0	0	0	0	0	0	0	0	0	0	0	0	0	0	0	0
ABCB6	5	green	0	0	0	0	0	0	0	0	0	0	0	1	0	0	0	0	0	0	0	0	0	0	0	0	0	0	0	0	0	0	0	0	0	0	0	0	0	0	0	0	0
ABCB7	4	yellow	0	0	0	0	0	0	0	0	0	0	0	0	0	0	0	0	0	0	0	0	0	0	0	0	0	0	0	0	0	0	0	0	0	0	0	0	0	0	0	1	0
ABCB8	21	darkred	0	0	0	0	0	0	0	0	0	1	0	0	0	0	0	0	0	0	0	0	0	0	0	0	0	0	0	0	0	0	0	0	0	0	0	0	0	0	0	0	0
ABCB9	2	blue	0	1	0	0	0	0	0	0	0	0	0	0	0	0	0	0	0	0	0	0	0	0	0	0	0	0	0	0	0	0	0	0	0	0	0	0	0	0	0	0	0
ABCC1	1	turquoise	0	0	0	0	0	0	0	0	0	0	0	0	0	0	0	0	0	0	0	0	0	0	0	0	0	0	0	0	0	0	0	0	0	0	0	0	1	0	0	0	0
ABCC10	7	black	1	0	0	0	0	0	0	0	0	0	0	0	0	0	0	0	0	0	0	0	0	0	0	0	0	0	0	0	0	0	0	0	0	0	0	0	0	0	0	0	0
ABCC12	2	blue	0	1	0	0	0	0	0	0	0	0	0	0	0	0	0	0	0	0	0	0	0	0	0	0	0	0	0	0	0	0	0	0	0	0	0	0	0	0	0	0	0
ABCC3	23	darkturquoise	0	0	0	0	0	0	0	0	0	0	1	0	0	0	0	0	0	0	0	0	0	0	0	0	0	0	0	0	0	0	0	0	0	0	0	0	0	0	0	0	0
ABCC4	4	yellow	0	0	0	0	0	0	0	0	0	0	0	0	0	0	0	0	0	0	0	0	0	0	0	0	0	0	0	0	0	0	0	0	0	0	0	0	0	0	0	1	0
ABCC5	15	midnightblue	0	0	0	0	0	0	0	0	0	0	0	0	0	0	0	0	0	0	0	0	1	0	0	0	0	0	0	0	0	0	0	0	0	0	0	0	0	0	0	0	0
ABCC8	2	blue	0	1	0	0	0	0	0	0	0	0	0	0	0	0	0	0	0	0	0	0	0	0	0	0	0	0	0	0	0	0	0	0	0	0	0	0	0	0	0	0	0
ABCC9	3	brown	0	0	1	0	0	0	0	0	0	0	0	0	0	0	0	0	0	0	0	0	0	0	0	0	0	0	0	0	0	0	0	0	0	0	0	0	0	0	0	0	0
ABCD1	9	magenta	0	0	0	0	0	0	0	0	0	0	0	0	0	0	0	0	0	0	1	0	0	0	0	0	0	0	0	0	0	0	0	0	0	0	0	0	0	0	0	0	0
ABCD2	8	pink	0	0	0	0	0	0	0	0	0	0	0	0	0	0	0	0	0	0	0	0	0	0	0	0	1	0	0	0	0	0	0	0	0	0	0	0	0	0	0	0	0
ABCD3	4	yellow	0	0	0	0	0	0	0	0	0	0	0	0	0	0	0	0	0	0	0	0	0	0	0	0	0	0	0	0	0	0	0	0	0	0	0	0	0	0	0	1	0
ABCD4	7	black	1	0	0	0	0	0	0	0	0	0	0	0	0	0	0	0	0	0	0	0	0	0	0	0	0	0	0	0	0	0	0	0	0	0	0	0	0	0	0	0	0
ABCE1	5	green	0	0	0	0	0	0	0	0	0	0	0	1	0	0	0	0	0	0	0	0	0	0	0	0	0	0	0	0	0	0	0	0	0	0	0	0	0	0	0	0	0
ABCF1	1	turquoise	0	0	0	0	0	0	0	0	0	0	0	0	0	0	0	0	0	0	0	0	0	0	0	0	0	0	0	0	0	0	0	0	0	0	0	0	1	0	0	0	0
ABCF2	2	blue	0	1	0	0	0	0	0	0	0	0	0	0	0	0	0	0	0	0	0	0	0	0	0	0	0	0	0	0	0	0	0	0	0	0	0	0	0	0	0	0	0
ABCF3	2	blue	0	1	0	0	0	0	0	0	0	0	0	0	0	0	0	0	0	0	0	0	0	0	0	0	0	0	0	0	0	0	0	0	0	0	0	0	0	0	0	0	0
ABCG1	12	tan	0	0	0	0	0	0	0	0	0	0	0	0	0	0	0	0	0	0	0	0	0	0	0	0	0	0	0	0	0	0	0	0	0	0	0	1	0	0	0	0	0
ABCG2	3	brown	0	0	1	0	0	0	0	0	0	0	0	0	0	0	0	0	0	0	0	0	0	0	0	0	0	0	0	0	0	0	0	0	0	0	0	0	0	0	0	0	0
ABCG4	2	blue	0	1	0	0	0	0	0	0	0	0	0	0	0	0	0	0	0	0	0	0	0	0	0	0	0	0	0	0	0	0	0	0	0	0	0	0	0	0	0	0	0
ABHD1	3	brown	0	0	1	0	0	0	0	0	0	0	0	0	0	0	0	0	0	0	0	0	0	0	0	0	0	0	0	0	0	0	0	0	0	0	0	0	0	0	0	0	0
ABHD10	5	green	0	0	0	0	0	0	0	0	0	0	0	1	0	0	0	0	0	0	0	0	0	0	0	0	0	0	0	0	0	0	0	0	0	0	0	0	0	0	0	0	0
ABHD11	3	brown	0	0	1	0	0	0	0	0	0	0	0	0	0	0	0	0	0	0	0	0	0	0	0	0	0	0	0	0	0	0	0	0	0	0	0	0	0	0	0	0	0
ABHD11-AS2	3	brown	0	0	1	0	0	0	0	0	0	0	0	0	0	0	0	0	0	0	0	0	0	0	0	0	0	0	0	0	0	0	0	0	0	0	0	0	0	0	0	0	0
ABHD12	2	blue	0	1	0	0	0	0	0	0	0	0	0	0	0	0	0	0	0	0	0	0	0	0	0	0	0	0	0	0	0	0	0	0	0	0	0	0	0	0	0	0	0
ABHD12B	23	darkturquoise	0	0	0	0	0	0	0	0	0	0	1	0	0	0	0	0	0	0	0	0	0	0	0	0	0	0	0	0	0	0	0	0	0	0	0	0	0	0	0	0	0
ABHD13	8	pink	0	0	0	0	0	0	0	0	0	0	0	0	0	0	0	0	0	0	0	0	0	0	0	0	1	0	0	0	0	0	0	0	0	0	0	0	0	0	0	0	0
ABHD14A	14	cyan	0	0	0	1	0	0	0	0	0	0	0	0	0	0	0	0	0	0	0	0	0	0	0	0	0	0	0	0	0	0	0	0	0	0	0	0	0	0	0	0	0
ABHD14A-ACY1	7	black	1	0	0	0	0	0	0	0	0	0	0	0	0	0	0	0	0	0	0	0	0	0	0	0	0	0	0	0	0	0	0	0	0	0	0	0	0	0	0	0	0
ABHD14B	3	brown	0	0	1	0	0	0	0	0	0	0	0	0	0	0	0	0	0	0	0	0	0	0	0	0	0	0	0	0	0	0	0	0	0	0	0	0	0	0	0	0	0
ABHD15	3	brown	0	0	1	0	0	0	0	0	0	0	0	0	0	0	0	0	0	0	0	0	0	0	0	0	0	0	0	0	0	0	0	0	0	0	0	0	0	0	0	0	0
ABHD16A	2	blue	0	1	0	0	0	0	0	0	0	0	0	0	0	0	0	0	0	0	0	0	0	0	0	0	0	0	0	0	0	0	0	0	0	0	0	0	0	0	0	0	0
ABHD16B	8	pink	0	0	0	0	0	0	0	0	0	0	0	0	0	0	0	0	0	0	0	0	0	0	0	0	1	0	0	0	0	0	0	0	0	0	0	0	0	0	0	0	0
ABHD2	8	pink	0	0	0	0	0	0	0	0	0	0	0	0	0	0	0	0	0	0	0	0	0	0	0	0	1	0	0	0	0	0	0	0	0	0	0	0	0	0	0	0	0
ABHD3	3	brown	0	0	1	0	0	0	0	0	0	0	0	0	0	0	0	0	0	0	0	0	0	0	0	0	0	0	0	0	0	0	0	0	0	0	0	0	0	0	0	0	0
ABHD4	3	brown	0	0	1	0	0	0	0	0	0	0	0	0	0	0	0	0	0	0	0	0	0	0	0	0	0	0	0	0	0	0	0	0	0	0	0	0	0	0	0	0	0
ABHD5	16	lightcyan	0	0	0	0	0	0	0	0	0	0	0	0	0	0	0	1	0	0	0	0	0	0	0	0	0	0	0	0	0	0	0	0	0	0	0	0	0	0	0	0	0
ABHD6	2	blue	0	1	0	0	0	0	0	0	0	0	0	0	0	0	0	0	0	0	0	0	0	0	0	0	0	0	0	0	0	0	0	0	0	0	0	0	0	0	0	0	0
ABHD8	2	blue	0	1	0	0	0	0	0	0	0	0	0	0	0	0	0	0	0	0	0	0	0	0	0	0	0	0	0	0	0	0	0	0	0	0	0	0	0	0	0	0	0
ABI1	6	red	0	0	0	0	0	0	0	0	0	0	0	0	0	0	0	0	0	0	0	0	0	0	0	0	0	0	0	1	0	0	0	0	0	0	0	0	0	0	0	0	0
ABI2	8	pink	0	0	0	0	0	0	0	0	0	0	0	0	0	0	0	0	0	0	0	0	0	0	0	0	1	0	0	0	0	0	0	0	0	0	0	0	0	0	0	0	0
ABI3	13	salmon	0	0	0	0	0	0	0	0	0	0	0	0	0	0	0	0	0	0	0	0	0	0	0	0	0	0	0	0	0	0	1	0	0	0	0	0	0	0	0	0	0
ABI3BP	13	salmon	0	0	0	0	0	0	0	0	0	0	0	0	0	0	0	0	0	0	0	0	0	0	0	0	0	0	0	0	0	0	1	0	0	0	0	0	0	0	0	0	0
ABL1	1	turquoise	0	0	0	0	0	0	0	0	0	0	0	0	0	0	0	0	0	0	0	0	0	0	0	0	0	0	0	0	0	0	0	0	0	0	0	0	1	0	0	0	0
ABL2	1	turquoise	0	0	0	0	0	0	0	0	0	0	0	0	0	0	0	0	0	0	0	0	0	0	0	0	0	0	0	0	0	0	0	0	0	0	0	0	1	0	0	0	0
ABLIM1	11	greenyellow	0	0	0	0	0	0	0	0	0	0	0	0	1	0	0	0	0	0	0	0	0	0	0	0	0	0	0	0	0	0	0	0	0	0	0	0	0	0	0	0	0
ABLIM2	2	blue	0	1	0	0	0	0	0	0	0	0	0	0	0	0	0	0	0	0	0	0	0	0	0	0	0	0	0	0	0	0	0	0	0	0	0	0	0	0	0	0	0
ABLIM3	11	greenyellow	0	0	0	0	0	0	0	0	0	0	0	0	1	0	0	0	0	0	0	0	0	0	0	0	0	0	0	0	0	0	0	0	0	0	0	0	0	0	0	0	0
ABO	3	brown	0	0	1	0	0	0	0	0	0	0	0	0	0	0	0	0	0	0	0	0	0	0	0	0	0	0	0	0	0	0	0	0	0	0	0	0	0	0	0	0	0
ABR	2	blue	0	1	0	0	0	0	0	0	0	0	0	0	0	0	0	0	0	0	0	0	0	0	0	0	0	0	0	0	0	0	0	0	0	0	0	0	0	0	0	0	0
ABT1	1	turquoise	0	0	0	0	0	0	0	0	0	0	0	0	0	0	0	0	0	0	0	0	0	0	0	0	0	0	0	0	0	0	0	0	0	0	0	0	1	0	0	0	0
ABTB1	2	blue	0	1	0	0	0	0	0	0	0	0	0	0	0	0	0	0	0	0	0	0	0	0	0	0	0	0	0	0	0	0	0	0	0	0	0	0	0	0	0	0	0
ABTB2	4	yellow	0	0	0	0	0	0	0	0	0	0	0	0	0	0	0	0	0	0	0	0	0	0	0	0	0	0	0	0	0	0	0	0	0	0	0	0	0	0	0	1	0
AC000029.1	6	red	0	0	0	0	0	0	0	0	0	0	0	0	0	0	0	0	0	0	0	0	0	0	0	0	0	0	0	1	0	0	0	0	0	0	0	0	0	0	0	0	0
AC000029.2	2	blue	0	1	0	0	0	0	0	0	0	0	0	0	0	0	0	0	0	0	0	0	0	0	0	0	0	0	0	0	0	0	0	0	0	0	0	0	0	0	0	0	0
AC000035.3	19	lightyellow	0	0	0	0	0	0	0	0	0	0	0	0	0	0	0	0	0	1	0	0	0	0	0	0	0	0	0	0	0	0	0	0	0	0	0	0	0	0	0	0	0
AC000036.5	2	blue	0	1	0	0	0	0	0	0	0	0	0	0	0	0	0	0	0	0	0	0	0	0	0	0	0	0	0	0	0	0	0	0	0	0	0	0	0	0	0	0	0
AC000041.8	0	grey	0	0	0	0	0	0	0	0	0	0	0	0	0	1	0	0	0	0	0	0	0	0	0	0	0	0	0	0	0	0	0	0	0	0	0	0	0	0	0	0	0
AC000067.1	3	brown	0	0	1	0	0	0	0	0	0	0	0	0	0	0	0	0	0	0	0	0	0	0	0	0	0	0	0	0	0	0	0	0	0	0	0	0	0	0	0	0	0
AC000068.5	1	turquoise	0	0	0	0	0	0	0	0	0	0	0	0	0	0	0	0	0	0	0	0	0	0	0	0	0	0	0	0	0	0	0	0	0	0	0	0	1	0	0	0	0
AC000078.5	11	greenyellow	0	0	0	0	0	0	0	0	0	0	0	0	1	0	0	0	0	0	0	0	0	0	0	0	0	0	0	0	0	0	0	0	0	0	0	0	0	0	0	0	0
AC000089.3	10	purple	0	0	0	0	0	0	0	0	0	0	0	0	0	0	0	0	0	0	0	0	0	0	0	0	0	0	1	0	0	0	0	0	0	0	0	0	0	0	0	0	0
AC000093.3	9	magenta	0	0	0	0	0	0	0	0	0	0	0	0	0	0	0	0	0	0	1	0	0	0	0	0	0	0	0	0	0	0	0	0	0	0	0	0	0	0	0	0	0
AC000110.1	4	yellow	0	0	0	0	0	0	0	0	0	0	0	0	0	0	0	0	0	0	0	0	0	0	0	0	0	0	0	0	0	0	0	0	0	0	0	0	0	0	0	1	0
AC000120.7	30	steelblue	0	0	0	0	0	0	0	0	0	0	0	0	0	0	0	0	0	0	0	0	0	0	0	0	0	0	0	0	0	0	0	0	0	0	1	0	0	0	0	0	0
AC000123.4	7	black	1	0	0	0	0	0	0	0	0	0	0	0	0	0	0	0	0	0	0	0	0	0	0	0	0	0	0	0	0	0	0	0	0	0	0	0	0	0	0	0	0
AC002055.4	5	green	0	0	0	0	0	0	0	0	0	0	0	1	0	0	0	0	0	0	0	0	0	0	0	0	0	0	0	0	0	0	0	0	0	0	0	0	0	0	0	0	0
AC002056.3	4	yellow	0	0	0	0	0	0	0	0	0	0	0	0	0	0	0	0	0	0	0	0	0	0	0	0	0	0	0	0	0	0	0	0	0	0	0	0	0	0	0	1	0
AC002064.4	0	grey	0	0	0	0	0	0	0	0	0	0	0	0	0	1	0	0	0	0	0	0	0	0	0	0	0	0	0	0	0	0	0	0	0	0	0	0	0	0	0	0	0
AC002069.5	4	yellow	0	0	0	0	0	0	0	0	0	0	0	0	0	0	0	0	0	0	0	0	0	0	0	0	0	0	0	0	0	0	0	0	0	0	0	0	0	0	0	1	0
AC002075.4	18	lightgreen	0	0	0	0	0	0	0	0	0	0	0	0	0	0	0	0	1	0	0	0	0	0	0	0	0	0	0	0	0	0	0	0	0	0	0	0	0	0	0	0	0
AC002076.9	0	grey	0	0	0	0	0	0	0	0	0	0	0	0	0	1	0	0	0	0	0	0	0	0	0	0	0	0	0	0	0	0	0	0	0	0	0	0	0	0	0	0	0
AC002115.5	11	greenyellow	0	0	0	0	0	0	0	0	0	0	0	0	1	0	0	0	0	0	0	0	0	0	0	0	0	0	0	0	0	0	0	0	0	0	0	0	0	0	0	0	0
AC002115.6	1	turquoise	0	0	0	0	0	0	0	0	0	0	0	0	0	0	0	0	0	0	0	0	0	0	0	0	0	0	0	0	0	0	0	0	0	0	0	0	1	0	0	0	0
AC002115.7	29	saddlebrown	0	0	0	0	0	0	0	0	0	0	0	0	0	0	0	0	0	0	0	0	0	0	0	0	0	0	0	0	0	1	0	0	0	0	0	0	0	0	0	0	0
AC002116.5	14	cyan	0	0	0	1	0	0	0	0	0	0	0	0	0	0	0	0	0	0	0	0	0	0	0	0	0	0	0	0	0	0	0	0	0	0	0	0	0	0	0	0	0
AC002117.1	2	blue	0	1	0	0	0	0	0	0	0	0	0	0	0	0	0	0	0	0	0	0	0	0	0	0	0	0	0	0	0	0	0	0	0	0	0	0	0	0	0	0	0
AC002306.1	17	grey60	0	0	0	0	0	0	0	0	0	0	0	0	0	0	1	0	0	0	0	0	0	0	0	0	0	0	0	0	0	0	0	0	0	0	0	0	0	0	0	0	0
AC002310.1	1	turquoise	0	0	0	0	0	0	0	0	0	0	0	0	0	0	0	0	0	0	0	0	0	0	0	0	0	0	0	0	0	0	0	0	0	0	0	0	1	0	0	0	0
AC002310.2	9	magenta	0	0	0	0	0	0	0	0	0	0	0	0	0	0	0	0	0	0	1	0	0	0	0	0	0	0	0	0	0	0	0	0	0	0	0	0	0	0	0	0	0
AC002310.7	17	grey60	0	0	0	0	0	0	0	0	0	0	0	0	0	0	1	0	0	0	0	0	0	0	0	0	0	0	0	0	0	0	0	0	0	0	0	0	0	0	0	0	0
AC002314.2	0	grey	0	0	0	0	0	0	0	0	0	0	0	0	0	1	0	0	0	0	0	0	0	0	0	0	0	0	0	0	0	0	0	0	0	0	0	0	0	0	0	0	0
AC002398.5	7	black	1	0	0	0	0	0	0	0	0	0	0	0	0	0	0	0	0	0	0	0	0	0	0	0	0	0	0	0	0	0	0	0	0	0	0	0	0	0	0	0	0
AC002401.1	2	blue	0	1	0	0	0	0	0	0	0	0	0	0	0	0	0	0	0	0	0	0	0	0	0	0	0	0	0	0	0	0	0	0	0	0	0	0	0	0	0	0	0
AC002429.4	0	grey	0	0	0	0	0	0	0	0	0	0	0	0	0	1	0	0	0	0	0	0	0	0	0	0	0	0	0	0	0	0	0	0	0	0	0	0	0	0	0	0	0
AC002429.5	3	brown	0	0	1	0	0	0	0	0	0	0	0	0	0	0	0	0	0	0	0	0	0	0	0	0	0	0	0	0	0	0	0	0	0	0	0	0	0	0	0	0	0
AC002451.3	3	brown	0	0	1	0	0	0	0	0	0	0	0	0	0	0	0	0	0	0	0	0	0	0	0	0	0	0	0	0	0	0	0	0	0	0	0	0	0	0	0	0	0
AC002454.1	27	white	0	0	0	0	0	0	0	0	0	0	0	0	0	0	0	0	0	0	0	0	0	0	0	0	0	0	0	0	0	0	0	0	0	0	0	0	0	0	1	0	0
AC002456.2	0	grey	0	0	0	0	0	0	0	0	0	0	0	0	0	1	0	0	0	0	0	0	0	0	0	0	0	0	0	0	0	0	0	0	0	0	0	0	0	0	0	0	0
AC002467.5	6	red	0	0	0	0	0	0	0	0	0	0	0	0	0	0	0	0	0	0	0	0	0	0	0	0	0	0	0	1	0	0	0	0	0	0	0	0	0	0	0	0	0
AC002467.7	6	red	0	0	0	0	0	0	0	0	0	0	0	0	0	0	0	0	0	0	0	0	0	0	0	0	0	0	0	1	0	0	0	0	0	0	0	0	0	0	0	0	0
AC002470.1	0	grey	0	0	0	0	0	0	0	0	0	0	0	0	0	1	0	0	0	0	0	0	0	0	0	0	0	0	0	0	0	0	0	0	0	0	0	0	0	0	0	0	0
AC002472.11	2	blue	0	1	0	0	0	0	0	0	0	0	0	0	0	0	0	0	0	0	0	0	0	0	0	0	0	0	0	0	0	0	0	0	0	0	0	0	0	0	0	0	0
AC002472.13	20	royalblue	0	0	0	0	0	0	0	0	0	0	0	0	0	0	0	0	0	0	0	0	0	0	0	0	0	0	0	0	1	0	0	0	0	0	0	0	0	0	0	0	0
AC002472.8	7	black	1	0	0	0	0	0	0	0	0	0	0	0	0	0	0	0	0	0	0	0	0	0	0	0	0	0	0	0	0	0	0	0	0	0	0	0	0	0	0	0	0
AC002472.9	7	black	1	0	0	0	0	0	0	0	0	0	0	0	0	0	0	0	0	0	0	0	0	0	0	0	0	0	0	0	0	0	0	0	0	0	0	0	0	0	0	0	0
AC002480.3	3	brown	0	0	1	0	0	0	0	0	0	0	0	0	0	0	0	0	0	0	0	0	0	0	0	0	0	0	0	0	0	0	0	0	0	0	0	0	0	0	0	0	0
AC002480.5	3	brown	0	0	1	0	0	0	0	0	0	0	0	0	0	0	0	0	0	0	0	0	0	0	0	0	0	0	0	0	0	0	0	0	0	0	0	0	0	0	0	0	0
AC002486.2	5	green	0	0	0	0	0	0	0	0	0	0	0	1	0	0	0	0	0	0	0	0	0	0	0	0	0	0	0	0	0	0	0	0	0	0	0	0	0	0	0	0	0
AC002519.1	0	grey	0	0	0	0	0	0	0	0	0	0	0	0	0	1	0	0	0	0	0	0	0	0	0	0	0	0	0	0	0	0	0	0	0	0	0	0	0	0	0	0	0
AC002542.2	0	grey	0	0	0	0	0	0	0	0	0	0	0	0	0	1	0	0	0	0	0	0	0	0	0	0	0	0	0	0	0	0	0	0	0	0	0	0	0	0	0	0	0
AC002553.1	29	saddlebrown	0	0	0	0	0	0	0	0	0	0	0	0	0	0	0	0	0	0	0	0	0	0	0	0	0	0	0	0	0	1	0	0	0	0	0	0	0	0	0	0	0
AC002553.2	15	midnightblue	0	0	0	0	0	0	0	0	0	0	0	0	0	0	0	0	0	0	0	0	1	0	0	0	0	0	0	0	0	0	0	0	0	0	0	0	0	0	0	0	0
AC002558.1	8	pink	0	0	0	0	0	0	0	0	0	0	0	0	0	0	0	0	0	0	0	0	0	0	0	0	1	0	0	0	0	0	0	0	0	0	0	0	0	0	0	0	0
AC002979.1	0	grey	0	0	0	0	0	0	0	0	0	0	0	0	0	1	0	0	0	0	0	0	0	0	0	0	0	0	0	0	0	0	0	0	0	0	0	0	0	0	0	0	0
AC002994.1	10	purple	0	0	0	0	0	0	0	0	0	0	0	0	0	0	0	0	0	0	0	0	0	0	0	0	0	0	1	0	0	0	0	0	0	0	0	0	0	0	0	0	0
AC003029.1	6	red	0	0	0	0	0	0	0	0	0	0	0	0	0	0	0	0	0	0	0	0	0	0	0	0	0	0	0	1	0	0	0	0	0	0	0	0	0	0	0	0	0
AC003029.4	11	greenyellow	0	0	0	0	0	0	0	0	0	0	0	0	1	0	0	0	0	0	0	0	0	0	0	0	0	0	0	0	0	0	0	0	0	0	0	0	0	0	0	0	0
AC003043.2	13	salmon	0	0	0	0	0	0	0	0	0	0	0	0	0	0	0	0	0	0	0	0	0	0	0	0	0	0	0	0	0	0	1	0	0	0	0	0	0	0	0	0	0
AC003075.4	6	red	0	0	0	0	0	0	0	0	0	0	0	0	0	0	0	0	0	0	0	0	0	0	0	0	0	0	0	1	0	0	0	0	0	0	0	0	0	0	0	0	0
AC003090.1	27	white	0	0	0	0	0	0	0	0	0	0	0	0	0	0	0	0	0	0	0	0	0	0	0	0	0	0	0	0	0	0	0	0	0	0	0	0	0	0	1	0	0
AC003102.1	13	salmon	0	0	0	0	0	0	0	0	0	0	0	0	0	0	0	0	0	0	0	0	0	0	0	0	0	0	0	0	0	0	1	0	0	0	0	0	0	0	0	0	0
AC003102.3	2	blue	0	1	0	0	0	0	0	0	0	0	0	0	0	0	0	0	0	0	0	0	0	0	0	0	0	0	0	0	0	0	0	0	0	0	0	0	0	0	0	0	0
AC003111.1	5	green	0	0	0	0	0	0	0	0	0	0	0	1	0	0	0	0	0	0	0	0	0	0	0	0	0	0	0	0	0	0	0	0	0	0	0	0	0	0	0	0	0
AC003111.2	7	black	1	0	0	0	0	0	0	0	0	0	0	0	0	0	0	0	0	0	0	0	0	0	0	0	0	0	0	0	0	0	0	0	0	0	0	0	0	0	0	0	0
AC003665.1	26	darkorange	0	0	0	0	0	0	0	0	1	0	0	0	0	0	0	0	0	0	0	0	0	0	0	0	0	0	0	0	0	0	0	0	0	0	0	0	0	0	0	0	0
AC003682.1	1	turquoise	0	0	0	0	0	0	0	0	0	0	0	0	0	0	0	0	0	0	0	0	0	0	0	0	0	0	0	0	0	0	0	0	0	0	0	0	1	0	0	0	0
AC003983.1	12	tan	0	0	0	0	0	0	0	0	0	0	0	0	0	0	0	0	0	0	0	0	0	0	0	0	0	0	0	0	0	0	0	0	0	0	0	1	0	0	0	0	0
AC004014.4	4	yellow	0	0	0	0	0	0	0	0	0	0	0	0	0	0	0	0	0	0	0	0	0	0	0	0	0	0	0	0	0	0	0	0	0	0	0	0	0	0	0	1	0
AC004016.2	0	grey	0	0	0	0	0	0	0	0	0	0	0	0	0	1	0	0	0	0	0	0	0	0	0	0	0	0	0	0	0	0	0	0	0	0	0	0	0	0	0	0	0
AC004017.1	3	brown	0	0	1	0	0	0	0	0	0	0	0	0	0	0	0	0	0	0	0	0	0	0	0	0	0	0	0	0	0	0	0	0	0	0	0	0	0	0	0	0	0
AC004019.13	3	brown	0	0	1	0	0	0	0	0	0	0	0	0	0	0	0	0	0	0	0	0	0	0	0	0	0	0	0	0	0	0	0	0	0	0	0	0	0	0	0	0	0
AC004041.2	1	turquoise	0	0	0	0	0	0	0	0	0	0	0	0	0	0	0	0	0	0	0	0	0	0	0	0	0	0	0	0	0	0	0	0	0	0	0	0	1	0	0	0	0
AC004049.3	8	pink	0	0	0	0	0	0	0	0	0	0	0	0	0	0	0	0	0	0	0	0	0	0	0	0	1	0	0	0	0	0	0	0	0	0	0	0	0	0	0	0	0
AC004053.1	9	magenta	0	0	0	0	0	0	0	0	0	0	0	0	0	0	0	0	0	0	1	0	0	0	0	0	0	0	0	0	0	0	0	0	0	0	0	0	0	0	0	0	0
AC004066.2	4	yellow	0	0	0	0	0	0	0	0	0	0	0	0	0	0	0	0	0	0	0	0	0	0	0	0	0	0	0	0	0	0	0	0	0	0	0	0	0	0	0	1	0
AC004066.3	29	saddlebrown	0	0	0	0	0	0	0	0	0	0	0	0	0	0	0	0	0	0	0	0	0	0	0	0	0	0	0	0	0	1	0	0	0	0	0	0	0	0	0	0	0
AC004069.1	1	turquoise	0	0	0	0	0	0	0	0	0	0	0	0	0	0	0	0	0	0	0	0	0	0	0	0	0	0	0	0	0	0	0	0	0	0	0	0	1	0	0	0	0
AC004069.2	18	lightgreen	0	0	0	0	0	0	0	0	0	0	0	0	0	0	0	0	1	0	0	0	0	0	0	0	0	0	0	0	0	0	0	0	0	0	0	0	0	0	0	0	0
AC004074.3	8	pink	0	0	0	0	0	0	0	0	0	0	0	0	0	0	0	0	0	0	0	0	0	0	0	0	1	0	0	0	0	0	0	0	0	0	0	0	0	0	0	0	0
AC004148.1	10	purple	0	0	0	0	0	0	0	0	0	0	0	0	0	0	0	0	0	0	0	0	0	0	0	0	0	0	1	0	0	0	0	0	0	0	0	0	0	0	0	0	0
AC004160.4	22	darkgreen	0	0	0	0	1	0	0	0	0	0	0	0	0	0	0	0	0	0	0	0	0	0	0	0	0	0	0	0	0	0	0	0	0	0	0	0	0	0	0	0	0
AC004166.6	14	cyan	0	0	0	1	0	0	0	0	0	0	0	0	0	0	0	0	0	0	0	0	0	0	0	0	0	0	0	0	0	0	0	0	0	0	0	0	0	0	0	0	0
AC004222.1	0	grey	0	0	0	0	0	0	0	0	0	0	0	0	0	1	0	0	0	0	0	0	0	0	0	0	0	0	0	0	0	0	0	0	0	0	0	0	0	0	0	0	0
AC004223.1	1	turquoise	0	0	0	0	0	0	0	0	0	0	0	0	0	0	0	0	0	0	0	0	0	0	0	0	0	0	0	0	0	0	0	0	0	0	0	0	1	0	0	0	0
AC004237.1	29	saddlebrown	0	0	0	0	0	0	0	0	0	0	0	0	0	0	0	0	0	0	0	0	0	0	0	0	0	0	0	0	0	1	0	0	0	0	0	0	0	0	0	0	0
AC004240.2	15	midnightblue	0	0	0	0	0	0	0	0	0	0	0	0	0	0	0	0	0	0	0	0	1	0	0	0	0	0	0	0	0	0	0	0	0	0	0	0	0	0	0	0	0
AC004258.1	14	cyan	0	0	0	1	0	0	0	0	0	0	0	0	0	0	0	0	0	0	0	0	0	0	0	0	0	0	0	0	0	0	0	0	0	0	0	0	0	0	0	0	0
AC004381.6	4	yellow	0	0	0	0	0	0	0	0	0	0	0	0	0	0	0	0	0	0	0	0	0	0	0	0	0	0	0	0	0	0	0	0	0	0	0	0	0	0	0	1	0
AC004383.1	0	grey	0	0	0	0	0	0	0	0	0	0	0	0	0	1	0	0	0	0	0	0	0	0	0	0	0	0	0	0	0	0	0	0	0	0	0	0	0	0	0	0	0
AC004383.3	7	black	1	0	0	0	0	0	0	0	0	0	0	0	0	0	0	0	0	0	0	0	0	0	0	0	0	0	0	0	0	0	0	0	0	0	0	0	0	0	0	0	0
AC004383.4	3	brown	0	0	1	0	0	0	0	0	0	0	0	0	0	0	0	0	0	0	0	0	0	0	0	0	0	0	0	0	0	0	0	0	0	0	0	0	0	0	0	0	0
AC004383.5	2	blue	0	1	0	0	0	0	0	0	0	0	0	0	0	0	0	0	0	0	0	0	0	0	0	0	0	0	0	0	0	0	0	0	0	0	0	0	0	0	0	0	0
AC004386.1	7	black	1	0	0	0	0	0	0	0	0	0	0	0	0	0	0	0	0	0	0	0	0	0	0	0	0	0	0	0	0	0	0	0	0	0	0	0	0	0	0	0	0
AC004386.4	10	purple	0	0	0	0	0	0	0	0	0	0	0	0	0	0	0	0	0	0	0	0	0	0	0	0	0	0	1	0	0	0	0	0	0	0	0	0	0	0	0	0	0
AC004410.1	7	black	1	0	0	0	0	0	0	0	0	0	0	0	0	0	0	0	0	0	0	0	0	0	0	0	0	0	0	0	0	0	0	0	0	0	0	0	0	0	0	0	0
AC004448.1	30	steelblue	0	0	0	0	0	0	0	0	0	0	0	0	0	0	0	0	0	0	0	0	0	0	0	0	0	0	0	0	0	0	0	0	0	0	1	0	0	0	0	0	0
AC004448.2	11	greenyellow	0	0	0	0	0	0	0	0	0	0	0	0	1	0	0	0	0	0	0	0	0	0	0	0	0	0	0	0	0	0	0	0	0	0	0	0	0	0	0	0	0
AC004448.3	10	purple	0	0	0	0	0	0	0	0	0	0	0	0	0	0	0	0	0	0	0	0	0	0	0	0	0	0	1	0	0	0	0	0	0	0	0	0	0	0	0	0	0
AC004448.4	25	orange	0	0	0	0	0	0	0	0	0	0	0	0	0	0	0	0	0	0	0	0	0	1	0	0	0	0	0	0	0	0	0	0	0	0	0	0	0	0	0	0	0
AC004448.5	7	black	1	0	0	0	0	0	0	0	0	0	0	0	0	0	0	0	0	0	0	0	0	0	0	0	0	0	0	0	0	0	0	0	0	0	0	0	0	0	0	0	0
AC004448.6	25	orange	0	0	0	0	0	0	0	0	0	0	0	0	0	0	0	0	0	0	0	0	0	1	0	0	0	0	0	0	0	0	0	0	0	0	0	0	0	0	0	0	0
AC004453.8	10	purple	0	0	0	0	0	0	0	0	0	0	0	0	0	0	0	0	0	0	0	0	0	0	0	0	0	0	1	0	0	0	0	0	0	0	0	0	0	0	0	0	0
AC004461.4	0	grey	0	0	0	0	0	0	0	0	0	0	0	0	0	1	0	0	0	0	0	0	0	0	0	0	0	0	0	0	0	0	0	0	0	0	0	0	0	0	0	0	0
AC004471.9	7	black	1	0	0	0	0	0	0	0	0	0	0	0	0	0	0	0	0	0	0	0	0	0	0	0	0	0	0	0	0	0	0	0	0	0	0	0	0	0	0	0	0
AC004485.3	0	grey	0	0	0	0	0	0	0	0	0	0	0	0	0	1	0	0	0	0	0	0	0	0	0	0	0	0	0	0	0	0	0	0	0	0	0	0	0	0	0	0	0
AC004507.1	1	turquoise	0	0	0	0	0	0	0	0	0	0	0	0	0	0	0	0	0	0	0	0	0	0	0	0	0	0	0	0	0	0	0	0	0	0	0	0	1	0	0	0	0
AC004538.3	0	grey	0	0	0	0	0	0	0	0	0	0	0	0	0	1	0	0	0	0	0	0	0	0	0	0	0	0	0	0	0	0	0	0	0	0	0	0	0	0	0	0	0
AC004540.4	33	darkolivegreen	0	0	0	0	0	0	0	1	0	0	0	0	0	0	0	0	0	0	0	0	0	0	0	0	0	0	0	0	0	0	0	0	0	0	0	0	0	0	0	0	0
AC004540.5	27	white	0	0	0	0	0	0	0	0	0	0	0	0	0	0	0	0	0	0	0	0	0	0	0	0	0	0	0	0	0	0	0	0	0	0	0	0	0	0	1	0	0
AC004549.6	4	yellow	0	0	0	0	0	0	0	0	0	0	0	0	0	0	0	0	0	0	0	0	0	0	0	0	0	0	0	0	0	0	0	0	0	0	0	0	0	0	0	1	0
AC004562.1	28	skyblue	0	0	0	0	0	0	0	0	0	0	0	0	0	0	0	0	0	0	0	0	0	0	0	0	0	0	0	0	0	0	0	0	1	0	0	0	0	0	0	0	0
AC004593.2	7	black	1	0	0	0	0	0	0	0	0	0	0	0	0	0	0	0	0	0	0	0	0	0	0	0	0	0	0	0	0	0	0	0	0	0	0	0	0	0	0	0	0
AC004603.4	12	tan	0	0	0	0	0	0	0	0	0	0	0	0	0	0	0	0	0	0	0	0	0	0	0	0	0	0	0	0	0	0	0	0	0	0	0	1	0	0	0	0	0
AC004673.1	29	saddlebrown	0	0	0	0	0	0	0	0	0	0	0	0	0	0	0	0	0	0	0	0	0	0	0	0	0	0	0	0	0	1	0	0	0	0	0	0	0	0	0	0	0
AC004692.5	0	grey	0	0	0	0	0	0	0	0	0	0	0	0	0	1	0	0	0	0	0	0	0	0	0	0	0	0	0	0	0	0	0	0	0	0	0	0	0	0	0	0	0
AC004696.1	6	red	0	0	0	0	0	0	0	0	0	0	0	0	0	0	0	0	0	0	0	0	0	0	0	0	0	0	0	1	0	0	0	0	0	0	0	0	0	0	0	0	0
AC004706.1	9	magenta	0	0	0	0	0	0	0	0	0	0	0	0	0	0	0	0	0	0	1	0	0	0	0	0	0	0	0	0	0	0	0	0	0	0	0	0	0	0	0	0	0
AC004771.1	2	blue	0	1	0	0	0	0	0	0	0	0	0	0	0	0	0	0	0	0	0	0	0	0	0	0	0	0	0	0	0	0	0	0	0	0	0	0	0	0	0	0	0
AC004771.2	2	blue	0	1	0	0	0	0	0	0	0	0	0	0	0	0	0	0	0	0	0	0	0	0	0	0	0	0	0	0	0	0	0	0	0	0	0	0	0	0	0	0	0
AC004797.1	5	green	0	0	0	0	0	0	0	0	0	0	0	1	0	0	0	0	0	0	0	0	0	0	0	0	0	0	0	0	0	0	0	0	0	0	0	0	0	0	0	0	0
AC004832.1	29	saddlebrown	0	0	0	0	0	0	0	0	0	0	0	0	0	0	0	0	0	0	0	0	0	0	0	0	0	0	0	0	0	1	0	0	0	0	0	0	0	0	0	0	0
AC004837.3	1	turquoise	0	0	0	0	0	0	0	0	0	0	0	0	0	0	0	0	0	0	0	0	0	0	0	0	0	0	0	0	0	0	0	0	0	0	0	0	1	0	0	0	0
AC004837.4	1	turquoise	0	0	0	0	0	0	0	0	0	0	0	0	0	0	0	0	0	0	0	0	0	0	0	0	0	0	0	0	0	0	0	0	0	0	0	0	1	0	0	0	0
AC004840.9	5	green	0	0	0	0	0	0	0	0	0	0	0	1	0	0	0	0	0	0	0	0	0	0	0	0	0	0	0	0	0	0	0	0	0	0	0	0	0	0	0	0	0
AC004851.1	0	grey	0	0	0	0	0	0	0	0	0	0	0	0	0	1	0	0	0	0	0	0	0	0	0	0	0	0	0	0	0	0	0	0	0	0	0	0	0	0	0	0	0
AC004854.4	40	mediumpurple3	0	0	0	0	0	0	0	0	0	0	0	0	0	0	0	0	0	0	0	1	0	0	0	0	0	0	0	0	0	0	0	0	0	0	0	0	0	0	0	0	0
AC004854.5	29	saddlebrown	0	0	0	0	0	0	0	0	0	0	0	0	0	0	0	0	0	0	0	0	0	0	0	0	0	0	0	0	0	1	0	0	0	0	0	0	0	0	0	0	0
AC004862.6	5	green	0	0	0	0	0	0	0	0	0	0	0	1	0	0	0	0	0	0	0	0	0	0	0	0	0	0	0	0	0	0	0	0	0	0	0	0	0	0	0	0	0
AC004863.6	3	brown	0	0	1	0	0	0	0	0	0	0	0	0	0	0	0	0	0	0	0	0	0	0	0	0	0	0	0	0	0	0	0	0	0	0	0	0	0	0	0	0	0
AC004866.1	30	steelblue	0	0	0	0	0	0	0	0	0	0	0	0	0	0	0	0	0	0	0	0	0	0	0	0	0	0	0	0	0	0	0	0	0	0	1	0	0	0	0	0	0
AC004884.1	29	saddlebrown	0	0	0	0	0	0	0	0	0	0	0	0	0	0	0	0	0	0	0	0	0	0	0	0	0	0	0	0	0	1	0	0	0	0	0	0	0	0	0	0	0
AC004889.1	0	grey	0	0	0	0	0	0	0	0	0	0	0	0	0	1	0	0	0	0	0	0	0	0	0	0	0	0	0	0	0	0	0	0	0	0	0	0	0	0	0	0	0
AC004893.10	8	pink	0	0	0	0	0	0	0	0	0	0	0	0	0	0	0	0	0	0	0	0	0	0	0	0	1	0	0	0	0	0	0	0	0	0	0	0	0	0	0	0	0
AC004893.11	1	turquoise	0	0	0	0	0	0	0	0	0	0	0	0	0	0	0	0	0	0	0	0	0	0	0	0	0	0	0	0	0	0	0	0	0	0	0	0	1	0	0	0	0
AC004894.2	1	turquoise	0	0	0	0	0	0	0	0	0	0	0	0	0	0	0	0	0	0	0	0	0	0	0	0	0	0	0	0	0	0	0	0	0	0	0	0	1	0	0	0	0
AC004906.3	23	darkturquoise	0	0	0	0	0	0	0	0	0	0	1	0	0	0	0	0	0	0	0	0	0	0	0	0	0	0	0	0	0	0	0	0	0	0	0	0	0	0	0	0	0
AC004917.1	1	turquoise	0	0	0	0	0	0	0	0	0	0	0	0	0	0	0	0	0	0	0	0	0	0	0	0	0	0	0	0	0	0	0	0	0	0	0	0	1	0	0	0	0
AC004924.1	0	grey	0	0	0	0	0	0	0	0	0	0	0	0	0	1	0	0	0	0	0	0	0	0	0	0	0	0	0	0	0	0	0	0	0	0	0	0	0	0	0	0	0
AC004932.1	0	grey	0	0	0	0	0	0	0	0	0	0	0	0	0	1	0	0	0	0	0	0	0	0	0	0	0	0	0	0	0	0	0	0	0	0	0	0	0	0	0	0	0
AC004932.2	0	grey	0	0	0	0	0	0	0	0	0	0	0	0	0	1	0	0	0	0	0	0	0	0	0	0	0	0	0	0	0	0	0	0	0	0	0	0	0	0	0	0	0
AC004941.5	1	turquoise	0	0	0	0	0	0	0	0	0	0	0	0	0	0	0	0	0	0	0	0	0	0	0	0	0	0	0	0	0	0	0	0	0	0	0	0	1	0	0	0	0
AC004951.5	2	blue	0	1	0	0	0	0	0	0	0	0	0	0	0	0	0	0	0	0	0	0	0	0	0	0	0	0	0	0	0	0	0	0	0	0	0	0	0	0	0	0	0
AC004951.6	32	violet	0	0	0	0	0	0	0	0	0	0	0	0	0	0	0	0	0	0	0	0	0	0	0	0	0	0	0	0	0	0	0	0	0	0	0	0	0	1	0	0	0
AC004967.11	1	turquoise	0	0	0	0	0	0	0	0	0	0	0	0	0	0	0	0	0	0	0	0	0	0	0	0	0	0	0	0	0	0	0	0	0	0	0	0	1	0	0	0	0
AC004967.7	3	brown	0	0	1	0	0	0	0	0	0	0	0	0	0	0	0	0	0	0	0	0	0	0	0	0	0	0	0	0	0	0	0	0	0	0	0	0	0	0	0	0	0
AC004967.8	3	brown	0	0	1	0	0	0	0	0	0	0	0	0	0	0	0	0	0	0	0	0	0	0	0	0	0	0	0	0	0	0	0	0	0	0	0	0	0	0	0	0	0
AC004979.1	0	grey	0	0	0	0	0	0	0	0	0	0	0	0	0	1	0	0	0	0	0	0	0	0	0	0	0	0	0	0	0	0	0	0	0	0	0	0	0	0	0	0	0
AC004979.2	0	grey	0	0	0	0	0	0	0	0	0	0	0	0	0	1	0	0	0	0	0	0	0	0	0	0	0	0	0	0	0	0	0	0	0	0	0	0	0	0	0	0	0
AC004979.3	0	grey	0	0	0	0	0	0	0	0	0	0	0	0	0	1	0	0	0	0	0	0	0	0	0	0	0	0	0	0	0	0	0	0	0	0	0	0	0	0	0	0	0
AC004979.4	0	grey	0	0	0	0	0	0	0	0	0	0	0	0	0	1	0	0	0	0	0	0	0	0	0	0	0	0	0	0	0	0	0	0	0	0	0	0	0	0	0	0	0
AC004979.6	0	grey	0	0	0	0	0	0	0	0	0	0	0	0	0	1	0	0	0	0	0	0	0	0	0	0	0	0	0	0	0	0	0	0	0	0	0	0	0	0	0	0	0
AC004980.10	0	grey	0	0	0	0	0	0	0	0	0	0	0	0	0	1	0	0	0	0	0	0	0	0	0	0	0	0	0	0	0	0	0	0	0	0	0	0	0	0	0	0	0
AC004980.12	23	darkturquoise	0	0	0	0	0	0	0	0	0	0	1	0	0	0	0	0	0	0	0	0	0	0	0	0	0	0	0	0	0	0	0	0	0	0	0	0	0	0	0	0	0
AC004980.7	2	blue	0	1	0	0	0	0	0	0	0	0	0	0	0	0	0	0	0	0	0	0	0	0	0	0	0	0	0	0	0	0	0	0	0	0	0	0	0	0	0	0	0
AC004980.9	0	grey	0	0	0	0	0	0	0	0	0	0	0	0	0	1	0	0	0	0	0	0	0	0	0	0	0	0	0	0	0	0	0	0	0	0	0	0	0	0	0	0	0
AC004985.12	7	black	1	0	0	0	0	0	0	0	0	0	0	0	0	0	0	0	0	0	0	0	0	0	0	0	0	0	0	0	0	0	0	0	0	0	0	0	0	0	0	0	0
AC004985.13	21	darkred	0	0	0	0	0	0	0	0	0	1	0	0	0	0	0	0	0	0	0	0	0	0	0	0	0	0	0	0	0	0	0	0	0	0	0	0	0	0	0	0	0
AC004987.10	22	darkgreen	0	0	0	0	1	0	0	0	0	0	0	0	0	0	0	0	0	0	0	0	0	0	0	0	0	0	0	0	0	0	0	0	0	0	0	0	0	0	0	0	0
AC004987.9	22	darkgreen	0	0	0	0	1	0	0	0	0	0	0	0	0	0	0	0	0	0	0	0	0	0	0	0	0	0	0	0	0	0	0	0	0	0	0	0	0	0	0	0	0
AC005000.1	5	green	0	0	0	0	0	0	0	0	0	0	0	1	0	0	0	0	0	0	0	0	0	0	0	0	0	0	0	0	0	0	0	0	0	0	0	0	0	0	0	0	0
AC005003.1	2	blue	0	1	0	0	0	0	0	0	0	0	0	0	0	0	0	0	0	0	0	0	0	0	0	0	0	0	0	0	0	0	0	0	0	0	0	0	0	0	0	0	0
AC005009.1	11	greenyellow	0	0	0	0	0	0	0	0	0	0	0	0	1	0	0	0	0	0	0	0	0	0	0	0	0	0	0	0	0	0	0	0	0	0	0	0	0	0	0	0	0
AC005009.2	36	yellowgreen	0	0	0	0	0	0	0	0	0	0	0	0	0	0	0	0	0	0	0	0	0	0	0	0	0	0	0	0	0	0	0	0	0	0	0	0	0	0	0	0	1
AC005013.1	3	brown	0	0	1	0	0	0	0	0	0	0	0	0	0	0	0	0	0	0	0	0	0	0	0	0	0	0	0	0	0	0	0	0	0	0	0	0	0	0	0	0	0
AC005013.5	3	brown	0	0	1	0	0	0	0	0	0	0	0	0	0	0	0	0	0	0	0	0	0	0	0	0	0	0	0	0	0	0	0	0	0	0	0	0	0	0	0	0	0
AC005014.5	1	turquoise	0	0	0	0	0	0	0	0	0	0	0	0	0	0	0	0	0	0	0	0	0	0	0	0	0	0	0	0	0	0	0	0	0	0	0	0	1	0	0	0	0
AC005017.1	2	blue	0	1	0	0	0	0	0	0	0	0	0	0	0	0	0	0	0	0	0	0	0	0	0	0	0	0	0	0	0	0	0	0	0	0	0	0	0	0	0	0	0
AC005027.4	28	skyblue	0	0	0	0	0	0	0	0	0	0	0	0	0	0	0	0	0	0	0	0	0	0	0	0	0	0	0	0	0	0	0	0	1	0	0	0	0	0	0	0	0
AC005034.3	6	red	0	0	0	0	0	0	0	0	0	0	0	0	0	0	0	0	0	0	0	0	0	0	0	0	0	0	0	1	0	0	0	0	0	0	0	0	0	0	0	0	0
AC005035.1	2	blue	0	1	0	0	0	0	0	0	0	0	0	0	0	0	0	0	0	0	0	0	0	0	0	0	0	0	0	0	0	0	0	0	0	0	0	0	0	0	0	0	0
AC005037.3	19	lightyellow	0	0	0	0	0	0	0	0	0	0	0	0	0	0	0	0	0	1	0	0	0	0	0	0	0	0	0	0	0	0	0	0	0	0	0	0	0	0	0	0	0
AC005037.6	3	brown	0	0	1	0	0	0	0	0	0	0	0	0	0	0	0	0	0	0	0	0	0	0	0	0	0	0	0	0	0	0	0	0	0	0	0	0	0	0	0	0	0
AC005041.11	2	blue	0	1	0	0	0	0	0	0	0	0	0	0	0	0	0	0	0	0	0	0	0	0	0	0	0	0	0	0	0	0	0	0	0	0	0	0	0	0	0	0	0
AC005041.9	2	blue	0	1	0	0	0	0	0	0	0	0	0	0	0	0	0	0	0	0	0	0	0	0	0	0	0	0	0	0	0	0	0	0	0	0	0	0	0	0	0	0	0
AC005042.4	12	tan	0	0	0	0	0	0	0	0	0	0	0	0	0	0	0	0	0	0	0	0	0	0	0	0	0	0	0	0	0	0	0	0	0	0	0	1	0	0	0	0	0
AC005062.3	40	mediumpurple3	0	0	0	0	0	0	0	0	0	0	0	0	0	0	0	0	0	0	0	1	0	0	0	0	0	0	0	0	0	0	0	0	0	0	0	0	0	0	0	0	0
AC005071.1	7	black	1	0	0	0	0	0	0	0	0	0	0	0	0	0	0	0	0	0	0	0	0	0	0	0	0	0	0	0	0	0	0	0	0	0	0	0	0	0	0	0	0
AC005071.2	7	black	1	0	0	0	0	0	0	0	0	0	0	0	0	0	0	0	0	0	0	0	0	0	0	0	0	0	0	0	0	0	0	0	0	0	0	0	0	0	0	0	0
AC005071.3	11	greenyellow	0	0	0	0	0	0	0	0	0	0	0	0	1	0	0	0	0	0	0	0	0	0	0	0	0	0	0	0	0	0	0	0	0	0	0	0	0	0	0	0	0
AC005076.5	6	red	0	0	0	0	0	0	0	0	0	0	0	0	0	0	0	0	0	0	0	0	0	0	0	0	0	0	0	1	0	0	0	0	0	0	0	0	0	0	0	0	0
AC005077.9	0	grey	0	0	0	0	0	0	0	0	0	0	0	0	0	1	0	0	0	0	0	0	0	0	0	0	0	0	0	0	0	0	0	0	0	0	0	0	0	0	0	0	0
AC005082.1	7	black	1	0	0	0	0	0	0	0	0	0	0	0	0	0	0	0	0	0	0	0	0	0	0	0	0	0	0	0	0	0	0	0	0	0	0	0	0	0	0	0	0
AC005082.12	26	darkorange	0	0	0	0	0	0	0	0	1	0	0	0	0	0	0	0	0	0	0	0	0	0	0	0	0	0	0	0	0	0	0	0	0	0	0	0	0	0	0	0	0
AC005086.4	32	violet	0	0	0	0	0	0	0	0	0	0	0	0	0	0	0	0	0	0	0	0	0	0	0	0	0	0	0	0	0	0	0	0	0	0	0	0	0	1	0	0	0
AC005102.1	4	yellow	0	0	0	0	0	0	0	0	0	0	0	0	0	0	0	0	0	0	0	0	0	0	0	0	0	0	0	0	0	0	0	0	0	0	0	0	0	0	0	1	0
AC005104.3	16	lightcyan	0	0	0	0	0	0	0	0	0	0	0	0	0	0	0	1	0	0	0	0	0	0	0	0	0	0	0	0	0	0	0	0	0	0	0	0	0	0	0	0	0
AC005152.1	16	lightcyan	0	0	0	0	0	0	0	0	0	0	0	0	0	0	0	1	0	0	0	0	0	0	0	0	0	0	0	0	0	0	0	0	0	0	0	0	0	0	0	0	0
AC005152.2	3	brown	0	0	1	0	0	0	0	0	0	0	0	0	0	0	0	0	0	0	0	0	0	0	0	0	0	0	0	0	0	0	0	0	0	0	0	0	0	0	0	0	0
AC005154.5	7	black	1	0	0	0	0	0	0	0	0	0	0	0	0	0	0	0	0	0	0	0	0	0	0	0	0	0	0	0	0	0	0	0	0	0	0	0	0	0	0	0	0
AC005154.6	15	midnightblue	0	0	0	0	0	0	0	0	0	0	0	0	0	0	0	0	0	0	0	0	1	0	0	0	0	0	0	0	0	0	0	0	0	0	0	0	0	0	0	0	0
AC005154.7	15	midnightblue	0	0	0	0	0	0	0	0	0	0	0	0	0	0	0	0	0	0	0	0	1	0	0	0	0	0	0	0	0	0	0	0	0	0	0	0	0	0	0	0	0
AC005154.9	15	midnightblue	0	0	0	0	0	0	0	0	0	0	0	0	0	0	0	0	0	0	0	0	1	0	0	0	0	0	0	0	0	0	0	0	0	0	0	0	0	0	0	0	0
AC005159.1	0	grey	0	0	0	0	0	0	0	0	0	0	0	0	0	1	0	0	0	0	0	0	0	0	0	0	0	0	0	0	0	0	0	0	0	0	0	0	0	0	0	0	0
AC005162.3	3	brown	0	0	1	0	0	0	0	0	0	0	0	0	0	0	0	0	0	0	0	0	0	0	0	0	0	0	0	0	0	0	0	0	0	0	0	0	0	0	0	0	0
AC005174.2	4	yellow	0	0	0	0	0	0	0	0	0	0	0	0	0	0	0	0	0	0	0	0	0	0	0	0	0	0	0	0	0	0	0	0	0	0	0	0	0	0	0	1	0
AC005189.6	1	turquoise	0	0	0	0	0	0	0	0	0	0	0	0	0	0	0	0	0	0	0	0	0	0	0	0	0	0	0	0	0	0	0	0	0	0	0	0	1	0	0	0	0
AC005204.2	18	lightgreen	0	0	0	0	0	0	0	0	0	0	0	0	0	0	0	0	1	0	0	0	0	0	0	0	0	0	0	0	0	0	0	0	0	0	0	0	0	0	0	0	0
AC005220.3	12	tan	0	0	0	0	0	0	0	0	0	0	0	0	0	0	0	0	0	0	0	0	0	0	0	0	0	0	0	0	0	0	0	0	0	0	0	1	0	0	0	0	0
AC005224.2	17	grey60	0	0	0	0	0	0	0	0	0	0	0	0	0	0	1	0	0	0	0	0	0	0	0	0	0	0	0	0	0	0	0	0	0	0	0	0	0	0	0	0	0
AC005229.5	0	grey	0	0	0	0	0	0	0	0	0	0	0	0	0	1	0	0	0	0	0	0	0	0	0	0	0	0	0	0	0	0	0	0	0	0	0	0	0	0	0	0	0
AC005229.7	10	purple	0	0	0	0	0	0	0	0	0	0	0	0	0	0	0	0	0	0	0	0	0	0	0	0	0	0	1	0	0	0	0	0	0	0	0	0	0	0	0	0	0
AC005232.1	11	greenyellow	0	0	0	0	0	0	0	0	0	0	0	0	1	0	0	0	0	0	0	0	0	0	0	0	0	0	0	0	0	0	0	0	0	0	0	0	0	0	0	0	0
AC005235.1	2	blue	0	1	0	0	0	0	0	0	0	0	0	0	0	0	0	0	0	0	0	0	0	0	0	0	0	0	0	0	0	0	0	0	0	0	0	0	0	0	0	0	0
AC005237.4	29	saddlebrown	0	0	0	0	0	0	0	0	0	0	0	0	0	0	0	0	0	0	0	0	0	0	0	0	0	0	0	0	0	1	0	0	0	0	0	0	0	0	0	0	0
AC005239.1	15	midnightblue	0	0	0	0	0	0	0	0	0	0	0	0	0	0	0	0	0	0	0	0	1	0	0	0	0	0	0	0	0	0	0	0	0	0	0	0	0	0	0	0	0
AC005251.3	10	purple	0	0	0	0	0	0	0	0	0	0	0	0	0	0	0	0	0	0	0	0	0	0	0	0	0	0	1	0	0	0	0	0	0	0	0	0	0	0	0	0	0
AC005255.1	5	green	0	0	0	0	0	0	0	0	0	0	0	1	0	0	0	0	0	0	0	0	0	0	0	0	0	0	0	0	0	0	0	0	0	0	0	0	0	0	0	0	0
AC005280.1	3	brown	0	0	1	0	0	0	0	0	0	0	0	0	0	0	0	0	0	0	0	0	0	0	0	0	0	0	0	0	0	0	0	0	0	0	0	0	0	0	0	0	0
AC005300.5	10	purple	0	0	0	0	0	0	0	0	0	0	0	0	0	0	0	0	0	0	0	0	0	0	0	0	0	0	1	0	0	0	0	0	0	0	0	0	0	0	0	0	0
AC005301.5	12	tan	0	0	0	0	0	0	0	0	0	0	0	0	0	0	0	0	0	0	0	0	0	0	0	0	0	0	0	0	0	0	0	0	0	0	0	1	0	0	0	0	0
AC005304.1	32	violet	0	0	0	0	0	0	0	0	0	0	0	0	0	0	0	0	0	0	0	0	0	0	0	0	0	0	0	0	0	0	0	0	0	0	0	0	0	1	0	0	0
AC005324.4	1	turquoise	0	0	0	0	0	0	0	0	0	0	0	0	0	0	0	0	0	0	0	0	0	0	0	0	0	0	0	0	0	0	0	0	0	0	0	0	1	0	0	0	0
AC005324.8-001	1	turquoise	0	0	0	0	0	0	0	0	0	0	0	0	0	0	0	0	0	0	0	0	0	0	0	0	0	0	0	0	0	0	0	0	0	0	0	0	1	0	0	0	0
AC005329.6	2	blue	0	1	0	0	0	0	0	0	0	0	0	0	0	0	0	0	0	0	0	0	0	0	0	0	0	0	0	0	0	0	0	0	0	0	0	0	0	0	0	0	0
AC005329.7	8	pink	0	0	0	0	0	0	0	0	0	0	0	0	0	0	0	0	0	0	0	0	0	0	0	0	1	0	0	0	0	0	0	0	0	0	0	0	0	0	0	0	0
AC005330.1	18	lightgreen	0	0	0	0	0	0	0	0	0	0	0	0	0	0	0	0	1	0	0	0	0	0	0	0	0	0	0	0	0	0	0	0	0	0	0	0	0	0	0	0	0
AC005332.1	3	brown	0	0	1	0	0	0	0	0	0	0	0	0	0	0	0	0	0	0	0	0	0	0	0	0	0	0	0	0	0	0	0	0	0	0	0	0	0	0	0	0	0
AC005351.1	19	lightyellow	0	0	0	0	0	0	0	0	0	0	0	0	0	0	0	0	0	1	0	0	0	0	0	0	0	0	0	0	0	0	0	0	0	0	0	0	0	0	0	0	0
AC005363.7	0	grey	0	0	0	0	0	0	0	0	0	0	0	0	0	1	0	0	0	0	0	0	0	0	0	0	0	0	0	0	0	0	0	0	0	0	0	0	0	0	0	0	0
AC005363.8	7	black	1	0	0	0	0	0	0	0	0	0	0	0	0	0	0	0	0	0	0	0	0	0	0	0	0	0	0	0	0	0	0	0	0	0	0	0	0	0	0	0	0
AC005363.9	7	black	1	0	0	0	0	0	0	0	0	0	0	0	0	0	0	0	0	0	0	0	0	0	0	0	0	0	0	0	0	0	0	0	0	0	0	0	0	0	0	0	0
AC005410.1	0	grey	0	0	0	0	0	0	0	0	0	0	0	0	0	1	0	0	0	0	0	0	0	0	0	0	0	0	0	0	0	0	0	0	0	0	0	0	0	0	0	0	0
AC005412.1	5	green	0	0	0	0	0	0	0	0	0	0	0	1	0	0	0	0	0	0	0	0	0	0	0	0	0	0	0	0	0	0	0	0	0	0	0	0	0	0	0	0	0
AC005481.5	4	yellow	0	0	0	0	0	0	0	0	0	0	0	0	0	0	0	0	0	0	0	0	0	0	0	0	0	0	0	0	0	0	0	0	0	0	0	0	0	0	0	1	0
AC005484.5	28	skyblue	0	0	0	0	0	0	0	0	0	0	0	0	0	0	0	0	0	0	0	0	0	0	0	0	0	0	0	0	0	0	0	0	1	0	0	0	0	0	0	0	0
AC005487.2	20	royalblue	0	0	0	0	0	0	0	0	0	0	0	0	0	0	0	0	0	0	0	0	0	0	0	0	0	0	0	0	1	0	0	0	0	0	0	0	0	0	0	0	0
AC005498.1	11	greenyellow	0	0	0	0	0	0	0	0	0	0	0	0	1	0	0	0	0	0	0	0	0	0	0	0	0	0	0	0	0	0	0	0	0	0	0	0	0	0	0	0	0
AC005510.2	1	turquoise	0	0	0	0	0	0	0	0	0	0	0	0	0	0	0	0	0	0	0	0	0	0	0	0	0	0	0	0	0	0	0	0	0	0	0	0	1	0	0	0	0
AC005517.2	18	lightgreen	0	0	0	0	0	0	0	0	0	0	0	0	0	0	0	0	1	0	0	0	0	0	0	0	0	0	0	0	0	0	0	0	0	0	0	0	0	0	0	0	0
AC005517.3	7	black	1	0	0	0	0	0	0	0	0	0	0	0	0	0	0	0	0	0	0	0	0	0	0	0	0	0	0	0	0	0	0	0	0	0	0	0	0	0	0	0	0
AC005519.4	7	black	1	0	0	0	0	0	0	0	0	0	0	0	0	0	0	0	0	0	0	0	0	0	0	0	0	0	0	0	0	0	0	0	0	0	0	0	0	0	0	0	0
AC005532.5	37	skyblue3	0	0	0	0	0	0	0	0	0	0	0	0	0	0	0	0	0	0	0	0	0	0	0	0	0	0	0	0	0	0	0	0	0	1	0	0	0	0	0	0	0
AC005534.6	3	brown	0	0	1	0	0	0	0	0	0	0	0	0	0	0	0	0	0	0	0	0	0	0	0	0	0	0	0	0	0	0	0	0	0	0	0	0	0	0	0	0	0
AC005534.8	0	grey	0	0	0	0	0	0	0	0	0	0	0	0	0	1	0	0	0	0	0	0	0	0	0	0	0	0	0	0	0	0	0	0	0	0	0	0	0	0	0	0	0
AC005534.9	3	brown	0	0	1	0	0	0	0	0	0	0	0	0	0	0	0	0	0	0	0	0	0	0	0	0	0	0	0	0	0	0	0	0	0	0	0	0	0	0	0	0	0
AC005537.2	2	blue	0	1	0	0	0	0	0	0	0	0	0	0	0	0	0	0	0	0	0	0	0	0	0	0	0	0	0	0	0	0	0	0	0	0	0	0	0	0	0	0	0
AC005540.3	19	lightyellow	0	0	0	0	0	0	0	0	0	0	0	0	0	0	0	0	0	1	0	0	0	0	0	0	0	0	0	0	0	0	0	0	0	0	0	0	0	0	0	0	0
AC005544.1	9	magenta	0	0	0	0	0	0	0	0	0	0	0	0	0	0	0	0	0	0	1	0	0	0	0	0	0	0	0	0	0	0	0	0	0	0	0	0	0	0	0	0	0
AC005550.4	0	grey	0	0	0	0	0	0	0	0	0	0	0	0	0	1	0	0	0	0	0	0	0	0	0	0	0	0	0	0	0	0	0	0	0	0	0	0	0	0	0	0	0
AC005550.6	18	lightgreen	0	0	0	0	0	0	0	0	0	0	0	0	0	0	0	0	1	0	0	0	0	0	0	0	0	0	0	0	0	0	0	0	0	0	0	0	0	0	0	0	0
AC005562.1	7	black	1	0	0	0	0	0	0	0	0	0	0	0	0	0	0	0	0	0	0	0	0	0	0	0	0	0	0	0	0	0	0	0	0	0	0	0	0	0	0	0	0
AC005562.2	1	turquoise	0	0	0	0	0	0	0	0	0	0	0	0	0	0	0	0	0	0	0	0	0	0	0	0	0	0	0	0	0	0	0	0	0	0	0	0	1	0	0	0	0
AC005562.3	4	yellow	0	0	0	0	0	0	0	0	0	0	0	0	0	0	0	0	0	0	0	0	0	0	0	0	0	0	0	0	0	0	0	0	0	0	0	0	0	0	0	1	0
AC005592.1	2	blue	0	1	0	0	0	0	0	0	0	0	0	0	0	0	0	0	0	0	0	0	0	0	0	0	0	0	0	0	0	0	0	0	0	0	0	0	0	0	0	0	0
AC005594.1	8	pink	0	0	0	0	0	0	0	0	0	0	0	0	0	0	0	0	0	0	0	0	0	0	0	0	1	0	0	0	0	0	0	0	0	0	0	0	0	0	0	0	0
AC005609.12	1	turquoise	0	0	0	0	0	0	0	0	0	0	0	0	0	0	0	0	0	0	0	0	0	0	0	0	0	0	0	0	0	0	0	0	0	0	0	0	1	0	0	0	0
AC005609.17	1	turquoise	0	0	0	0	0	0	0	0	0	0	0	0	0	0	0	0	0	0	0	0	0	0	0	0	0	0	0	0	0	0	0	0	0	0	0	0	1	0	0	0	0
AC005618.1	5	green	0	0	0	0	0	0	0	0	0	0	0	1	0	0	0	0	0	0	0	0	0	0	0	0	0	0	0	0	0	0	0	0	0	0	0	0	0	0	0	0	0
AC005626.1	30	steelblue	0	0	0	0	0	0	0	0	0	0	0	0	0	0	0	0	0	0	0	0	0	0	0	0	0	0	0	0	0	0	0	0	0	0	1	0	0	0	0	0	0
AC005696.1	7	black	1	0	0	0	0	0	0	0	0	0	0	0	0	0	0	0	0	0	0	0	0	0	0	0	0	0	0	0	0	0	0	0	0	0	0	0	0	0	0	0	0
AC005696.2	7	black	1	0	0	0	0	0	0	0	0	0	0	0	0	0	0	0	0	0	0	0	0	0	0	0	0	0	0	0	0	0	0	0	0	0	0	0	0	0	0	0	0
AC005726.6	7	black	1	0	0	0	0	0	0	0	0	0	0	0	0	0	0	0	0	0	0	0	0	0	0	0	0	0	0	0	0	0	0	0	0	0	0	0	0	0	0	0	0
AC005740.3	0	grey	0	0	0	0	0	0	0	0	0	0	0	0	0	1	0	0	0	0	0	0	0	0	0	0	0	0	0	0	0	0	0	0	0	0	0	0	0	0	0	0	0
AC005740.4	5	green	0	0	0	0	0	0	0	0	0	0	0	1	0	0	0	0	0	0	0	0	0	0	0	0	0	0	0	0	0	0	0	0	0	0	0	0	0	0	0	0	0
AC005740.5	8	pink	0	0	0	0	0	0	0	0	0	0	0	0	0	0	0	0	0	0	0	0	0	0	0	0	1	0	0	0	0	0	0	0	0	0	0	0	0	0	0	0	0
AC005753.1	2	blue	0	1	0	0	0	0	0	0	0	0	0	0	0	0	0	0	0	0	0	0	0	0	0	0	0	0	0	0	0	0	0	0	0	0	0	0	0	0	0	0	0
AC005790.2	8	pink	0	0	0	0	0	0	0	0	0	0	0	0	0	0	0	0	0	0	0	0	0	0	0	0	1	0	0	0	0	0	0	0	0	0	0	0	0	0	0	0	0
AC005822.1	1	turquoise	0	0	0	0	0	0	0	0	0	0	0	0	0	0	0	0	0	0	0	0	0	0	0	0	0	0	0	0	0	0	0	0	0	0	0	0	1	0	0	0	0
AC005826.1	0	grey	0	0	0	0	0	0	0	0	0	0	0	0	0	1	0	0	0	0	0	0	0	0	0	0	0	0	0	0	0	0	0	0	0	0	0	0	0	0	0	0	0
AC005884.1	18	lightgreen	0	0	0	0	0	0	0	0	0	0	0	0	0	0	0	0	1	0	0	0	0	0	0	0	0	0	0	0	0	0	0	0	0	0	0	0	0	0	0	0	0
AC005895.3	3	brown	0	0	1	0	0	0	0	0	0	0	0	0	0	0	0	0	0	0	0	0	0	0	0	0	0	0	0	0	0	0	0	0	0	0	0	0	0	0	0	0	0
AC005895.4	3	brown	0	0	1	0	0	0	0	0	0	0	0	0	0	0	0	0	0	0	0	0	0	0	0	0	0	0	0	0	0	0	0	0	0	0	0	0	0	0	0	0	0
AC005899.1	1	turquoise	0	0	0	0	0	0	0	0	0	0	0	0	0	0	0	0	0	0	0	0	0	0	0	0	0	0	0	0	0	0	0	0	0	0	0	0	1	0	0	0	0
AC005908.1	27	white	0	0	0	0	0	0	0	0	0	0	0	0	0	0	0	0	0	0	0	0	0	0	0	0	0	0	0	0	0	0	0	0	0	0	0	0	0	0	1	0	0
AC005943.1	7	black	1	0	0	0	0	0	0	0	0	0	0	0	0	0	0	0	0	0	0	0	0	0	0	0	0	0	0	0	0	0	0	0	0	0	0	0	0	0	0	0	0
AC005962.1	0	grey	0	0	0	0	0	0	0	0	0	0	0	0	0	1	0	0	0	0	0	0	0	0	0	0	0	0	0	0	0	0	0	0	0	0	0	0	0	0	0	0	0
AC005971.3	1	turquoise	0	0	0	0	0	0	0	0	0	0	0	0	0	0	0	0	0	0	0	0	0	0	0	0	0	0	0	0	0	0	0	0	0	0	0	0	1	0	0	0	0
AC006001.1	16	lightcyan	0	0	0	0	0	0	0	0	0	0	0	0	0	0	0	1	0	0	0	0	0	0	0	0	0	0	0	0	0	0	0	0	0	0	0	0	0	0	0	0	0
AC006007.1	2	blue	0	1	0	0	0	0	0	0	0	0	0	0	0	0	0	0	0	0	0	0	0	0	0	0	0	0	0	0	0	0	0	0	0	0	0	0	0	0	0	0	0
AC006011.4	1	turquoise	0	0	0	0	0	0	0	0	0	0	0	0	0	0	0	0	0	0	0	0	0	0	0	0	0	0	0	0	0	0	0	0	0	0	0	0	1	0	0	0	0
AC006014.7	1	turquoise	0	0	0	0	0	0	0	0	0	0	0	0	0	0	0	0	0	0	0	0	0	0	0	0	0	0	0	0	0	0	0	0	0	0	0	0	1	0	0	0	0
AC006023.8	5	green	0	0	0	0	0	0	0	0	0	0	0	1	0	0	0	0	0	0	0	0	0	0	0	0	0	0	0	0	0	0	0	0	0	0	0	0	0	0	0	0	0
AC006024.4	12	tan	0	0	0	0	0	0	0	0	0	0	0	0	0	0	0	0	0	0	0	0	0	0	0	0	0	0	0	0	0	0	0	0	0	0	0	1	0	0	0	0	0
AC006026.10	1	turquoise	0	0	0	0	0	0	0	0	0	0	0	0	0	0	0	0	0	0	0	0	0	0	0	0	0	0	0	0	0	0	0	0	0	0	0	0	1	0	0	0	0
AC006026.11	4	yellow	0	0	0	0	0	0	0	0	0	0	0	0	0	0	0	0	0	0	0	0	0	0	0	0	0	0	0	0	0	0	0	0	0	0	0	0	0	0	0	1	0
AC006026.13	1	turquoise	0	0	0	0	0	0	0	0	0	0	0	0	0	0	0	0	0	0	0	0	0	0	0	0	0	0	0	0	0	0	0	0	0	0	0	0	1	0	0	0	0
AC006026.9	5	green	0	0	0	0	0	0	0	0	0	0	0	1	0	0	0	0	0	0	0	0	0	0	0	0	0	0	0	0	0	0	0	0	0	0	0	0	0	0	0	0	0
AC006027.2	5	green	0	0	0	0	0	0	0	0	0	0	0	1	0	0	0	0	0	0	0	0	0	0	0	0	0	0	0	0	0	0	0	0	0	0	0	0	0	0	0	0	0
AC006028.10	3	brown	0	0	1	0	0	0	0	0	0	0	0	0	0	0	0	0	0	0	0	0	0	0	0	0	0	0	0	0	0	0	0	0	0	0	0	0	0	0	0	0	0
AC006028.11	5	green	0	0	0	0	0	0	0	0	0	0	0	1	0	0	0	0	0	0	0	0	0	0	0	0	0	0	0	0	0	0	0	0	0	0	0	0	0	0	0	0	0
AC006028.9	36	yellowgreen	0	0	0	0	0	0	0	0	0	0	0	0	0	0	0	0	0	0	0	0	0	0	0	0	0	0	0	0	0	0	0	0	0	0	0	0	0	0	0	0	1
AC006032.1	0	grey	0	0	0	0	0	0	0	0	0	0	0	0	0	1	0	0	0	0	0	0	0	0	0	0	0	0	0	0	0	0	0	0	0	0	0	0	0	0	0	0	0
AC006033.22	3	brown	0	0	1	0	0	0	0	0	0	0	0	0	0	0	0	0	0	0	0	0	0	0	0	0	0	0	0	0	0	0	0	0	0	0	0	0	0	0	0	0	0
AC006038.4	0	grey	0	0	0	0	0	0	0	0	0	0	0	0	0	1	0	0	0	0	0	0	0	0	0	0	0	0	0	0	0	0	0	0	0	0	0	0	0	0	0	0	0
AC006039.4	3	brown	0	0	1	0	0	0	0	0	0	0	0	0	0	0	0	0	0	0	0	0	0	0	0	0	0	0	0	0	0	0	0	0	0	0	0	0	0	0	0	0	0
AC006042.6	15	midnightblue	0	0	0	0	0	0	0	0	0	0	0	0	0	0	0	0	0	0	0	0	1	0	0	0	0	0	0	0	0	0	0	0	0	0	0	0	0	0	0	0	0
AC006042.7	1	turquoise	0	0	0	0	0	0	0	0	0	0	0	0	0	0	0	0	0	0	0	0	0	0	0	0	0	0	0	0	0	0	0	0	0	0	0	0	1	0	0	0	0
AC006042.8	4	yellow	0	0	0	0	0	0	0	0	0	0	0	0	0	0	0	0	0	0	0	0	0	0	0	0	0	0	0	0	0	0	0	0	0	0	0	0	0	0	0	1	0
AC006050.2	0	grey	0	0	0	0	0	0	0	0	0	0	0	0	0	1	0	0	0	0	0	0	0	0	0	0	0	0	0	0	0	0	0	0	0	0	0	0	0	0	0	0	0
AC006050.3	2	blue	0	1	0	0	0	0	0	0	0	0	0	0	0	0	0	0	0	0	0	0	0	0	0	0	0	0	0	0	0	0	0	0	0	0	0	0	0	0	0	0	0
AC006111.1	30	steelblue	0	0	0	0	0	0	0	0	0	0	0	0	0	0	0	0	0	0	0	0	0	0	0	0	0	0	0	0	0	0	0	0	0	0	1	0	0	0	0	0	0
AC006116.1	6	red	0	0	0	0	0	0	0	0	0	0	0	0	0	0	0	0	0	0	0	0	0	0	0	0	0	0	0	1	0	0	0	0	0	0	0	0	0	0	0	0	0
AC006157.2	4	yellow	0	0	0	0	0	0	0	0	0	0	0	0	0	0	0	0	0	0	0	0	0	0	0	0	0	0	0	0	0	0	0	0	0	0	0	0	0	0	0	1	0
AC006160.5	3	brown	0	0	1	0	0	0	0	0	0	0	0	0	0	0	0	0	0	0	0	0	0	0	0	0	0	0	0	0	0	0	0	0	0	0	0	0	0	0	0	0	0
AC006160.8	17	grey60	0	0	0	0	0	0	0	0	0	0	0	0	0	0	1	0	0	0	0	0	0	0	0	0	0	0	0	0	0	0	0	0	0	0	0	0	0	0	0	0	0
AC006213.1	0	grey	0	0	0	0	0	0	0	0	0	0	0	0	0	1	0	0	0	0	0	0	0	0	0	0	0	0	0	0	0	0	0	0	0	0	0	0	0	0	0	0	0
AC006230.4	9	magenta	0	0	0	0	0	0	0	0	0	0	0	0	0	0	0	0	0	0	1	0	0	0	0	0	0	0	0	0	0	0	0	0	0	0	0	0	0	0	0	0	0
AC006262.1	15	midnightblue	0	0	0	0	0	0	0	0	0	0	0	0	0	0	0	0	0	0	0	0	1	0	0	0	0	0	0	0	0	0	0	0	0	0	0	0	0	0	0	0	0
AC006276.1	19	lightyellow	0	0	0	0	0	0	0	0	0	0	0	0	0	0	0	0	0	1	0	0	0	0	0	0	0	0	0	0	0	0	0	0	0	0	0	0	0	0	0	0	0
AC006277.2	11	greenyellow	0	0	0	0	0	0	0	0	0	0	0	0	1	0	0	0	0	0	0	0	0	0	0	0	0	0	0	0	0	0	0	0	0	0	0	0	0	0	0	0	0
AC006323.1	0	grey	0	0	0	0	0	0	0	0	0	0	0	0	0	1	0	0	0	0	0	0	0	0	0	0	0	0	0	0	0	0	0	0	0	0	0	0	0	0	0	0	0
AC006368.1	30	steelblue	0	0	0	0	0	0	0	0	0	0	0	0	0	0	0	0	0	0	0	0	0	0	0	0	0	0	0	0	0	0	0	0	0	0	1	0	0	0	0	0	0
AC006369.2	5	green	0	0	0	0	0	0	0	0	0	0	0	1	0	0	0	0	0	0	0	0	0	0	0	0	0	0	0	0	0	0	0	0	0	0	0	0	0	0	0	0	0
AC006370.2	1	turquoise	0	0	0	0	0	0	0	0	0	0	0	0	0	0	0	0	0	0	0	0	0	0	0	0	0	0	0	0	0	0	0	0	0	0	0	0	1	0	0	0	0
AC006372.4	28	skyblue	0	0	0	0	0	0	0	0	0	0	0	0	0	0	0	0	0	0	0	0	0	0	0	0	0	0	0	0	0	0	0	0	1	0	0	0	0	0	0	0	0
AC006372.6	25	orange	0	0	0	0	0	0	0	0	0	0	0	0	0	0	0	0	0	0	0	0	0	1	0	0	0	0	0	0	0	0	0	0	0	0	0	0	0	0	0	0	0
AC006373.1	0	grey	0	0	0	0	0	0	0	0	0	0	0	0	0	1	0	0	0	0	0	0	0	0	0	0	0	0	0	0	0	0	0	0	0	0	0	0	0	0	0	0	0
AC006378.2	0	grey	0	0	0	0	0	0	0	0	0	0	0	0	0	1	0	0	0	0	0	0	0	0	0	0	0	0	0	0	0	0	0	0	0	0	0	0	0	0	0	0	0
AC006378.3	0	grey	0	0	0	0	0	0	0	0	0	0	0	0	0	1	0	0	0	0	0	0	0	0	0	0	0	0	0	0	0	0	0	0	0	0	0	0	0	0	0	0	0
AC006427.1	10	purple	0	0	0	0	0	0	0	0	0	0	0	0	0	0	0	0	0	0	0	0	0	0	0	0	0	0	1	0	0	0	0	0	0	0	0	0	0	0	0	0	0
AC006435.1	7	black	1	0	0	0	0	0	0	0	0	0	0	0	0	0	0	0	0	0	0	0	0	0	0	0	0	0	0	0	0	0	0	0	0	0	0	0	0	0	0	0	0
AC006449.1	3	brown	0	0	1	0	0	0	0	0	0	0	0	0	0	0	0	0	0	0	0	0	0	0	0	0	0	0	0	0	0	0	0	0	0	0	0	0	0	0	0	0	0
AC006460.2	1	turquoise	0	0	0	0	0	0	0	0	0	0	0	0	0	0	0	0	0	0	0	0	0	0	0	0	0	0	0	0	0	0	0	0	0	0	0	0	1	0	0	0	0
AC006465.3	2	blue	0	1	0	0	0	0	0	0	0	0	0	0	0	0	0	0	0	0	0	0	0	0	0	0	0	0	0	0	0	0	0	0	0	0	0	0	0	0	0	0	0
AC006465.4	4	yellow	0	0	0	0	0	0	0	0	0	0	0	0	0	0	0	0	0	0	0	0	0	0	0	0	0	0	0	0	0	0	0	0	0	0	0	0	0	0	0	1	0
AC006466.5	1	turquoise	0	0	0	0	0	0	0	0	0	0	0	0	0	0	0	0	0	0	0	0	0	0	0	0	0	0	0	0	0	0	0	0	0	0	0	0	1	0	0	0	0
AC006483.5	13	salmon	0	0	0	0	0	0	0	0	0	0	0	0	0	0	0	0	0	0	0	0	0	0	0	0	0	0	0	0	0	0	1	0	0	0	0	0	0	0	0	0	0
AC006486.1	2	blue	0	1	0	0	0	0	0	0	0	0	0	0	0	0	0	0	0	0	0	0	0	0	0	0	0	0	0	0	0	0	0	0	0	0	0	0	0	0	0	0	0
AC006487.1	0	grey	0	0	0	0	0	0	0	0	0	0	0	0	0	1	0	0	0	0	0	0	0	0	0	0	0	0	0	0	0	0	0	0	0	0	0	0	0	0	0	0	0
AC006504.1	24	darkgrey	0	0	0	0	0	1	0	0	0	0	0	0	0	0	0	0	0	0	0	0	0	0	0	0	0	0	0	0	0	0	0	0	0	0	0	0	0	0	0	0	0
AC006504.2	3	brown	0	0	1	0	0	0	0	0	0	0	0	0	0	0	0	0	0	0	0	0	0	0	0	0	0	0	0	0	0	0	0	0	0	0	0	0	0	0	0	0	0
AC006509.7	6	red	0	0	0	0	0	0	0	0	0	0	0	0	0	0	0	0	0	0	0	0	0	0	0	0	0	0	0	1	0	0	0	0	0	0	0	0	0	0	0	0	0
AC006547.1	0	grey	0	0	0	0	0	0	0	0	0	0	0	0	0	1	0	0	0	0	0	0	0	0	0	0	0	0	0	0	0	0	0	0	0	0	0	0	0	0	0	0	0
AC006547.13	2	blue	0	1	0	0	0	0	0	0	0	0	0	0	0	0	0	0	0	0	0	0	0	0	0	0	0	0	0	0	0	0	0	0	0	0	0	0	0	0	0	0	0
AC006547.14	23	darkturquoise	0	0	0	0	0	0	0	0	0	0	1	0	0	0	0	0	0	0	0	0	0	0	0	0	0	0	0	0	0	0	0	0	0	0	0	0	0	0	0	0	0
AC006547.8	17	grey60	0	0	0	0	0	0	0	0	0	0	0	0	0	0	1	0	0	0	0	0	0	0	0	0	0	0	0	0	0	0	0	0	0	0	0	0	0	0	0	0	0
AC006557.2	0	grey	0	0	0	0	0	0	0	0	0	0	0	0	0	1	0	0	0	0	0	0	0	0	0	0	0	0	0	0	0	0	0	0	0	0	0	0	0	0	0	0	0
AC006946.15	3	brown	0	0	1	0	0	0	0	0	0	0	0	0	0	0	0	0	0	0	0	0	0	0	0	0	0	0	0	0	0	0	0	0	0	0	0	0	0	0	0	0	0
AC006960.5	0	grey	0	0	0	0	0	0	0	0	0	0	0	0	0	1	0	0	0	0	0	0	0	0	0	0	0	0	0	0	0	0	0	0	0	0	0	0	0	0	0	0	0
AC006978.6	1	turquoise	0	0	0	0	0	0	0	0	0	0	0	0	0	0	0	0	0	0	0	0	0	0	0	0	0	0	0	0	0	0	0	0	0	0	0	0	1	0	0	0	0
AC006989.2	0	grey	0	0	0	0	0	0	0	0	0	0	0	0	0	1	0	0	0	0	0	0	0	0	0	0	0	0	0	0	0	0	0	0	0	0	0	0	0	0	0	0	0
AC007000.11	7	black	1	0	0	0	0	0	0	0	0	0	0	0	0	0	0	0	0	0	0	0	0	0	0	0	0	0	0	0	0	0	0	0	0	0	0	0	0	0	0	0	0
AC007009.1	6	red	0	0	0	0	0	0	0	0	0	0	0	0	0	0	0	0	0	0	0	0	0	0	0	0	0	0	0	1	0	0	0	0	0	0	0	0	0	0	0	0	0
AC007014.1	1	turquoise	0	0	0	0	0	0	0	0	0	0	0	0	0	0	0	0	0	0	0	0	0	0	0	0	0	0	0	0	0	0	0	0	0	0	0	0	1	0	0	0	0
AC007016.3	0	grey	0	0	0	0	0	0	0	0	0	0	0	0	0	1	0	0	0	0	0	0	0	0	0	0	0	0	0	0	0	0	0	0	0	0	0	0	0	0	0	0	0
AC007036.4	32	violet	0	0	0	0	0	0	0	0	0	0	0	0	0	0	0	0	0	0	0	0	0	0	0	0	0	0	0	0	0	0	0	0	0	0	0	0	0	1	0	0	0
AC007036.5	12	tan	0	0	0	0	0	0	0	0	0	0	0	0	0	0	0	0	0	0	0	0	0	0	0	0	0	0	0	0	0	0	0	0	0	0	0	1	0	0	0	0	0
AC007038.7	7	black	1	0	0	0	0	0	0	0	0	0	0	0	0	0	0	0	0	0	0	0	0	0	0	0	0	0	0	0	0	0	0	0	0	0	0	0	0	0	0	0	0
AC007040.1	0	grey	0	0	0	0	0	0	0	0	0	0	0	0	0	1	0	0	0	0	0	0	0	0	0	0	0	0	0	0	0	0	0	0	0	0	0	0	0	0	0	0	0
AC007040.11	1	turquoise	0	0	0	0	0	0	0	0	0	0	0	0	0	0	0	0	0	0	0	0	0	0	0	0	0	0	0	0	0	0	0	0	0	0	0	0	1	0	0	0	0
AC007040.6	1	turquoise	0	0	0	0	0	0	0	0	0	0	0	0	0	0	0	0	0	0	0	0	0	0	0	0	0	0	0	0	0	0	0	0	0	0	0	0	1	0	0	0	0
AC007041.2	5	green	0	0	0	0	0	0	0	0	0	0	0	1	0	0	0	0	0	0	0	0	0	0	0	0	0	0	0	0	0	0	0	0	0	0	0	0	0	0	0	0	0
AC007050.18	8	pink	0	0	0	0	0	0	0	0	0	0	0	0	0	0	0	0	0	0	0	0	0	0	0	0	1	0	0	0	0	0	0	0	0	0	0	0	0	0	0	0	0
AC007092.1	1	turquoise	0	0	0	0	0	0	0	0	0	0	0	0	0	0	0	0	0	0	0	0	0	0	0	0	0	0	0	0	0	0	0	0	0	0	0	0	1	0	0	0	0
AC007098.1	8	pink	0	0	0	0	0	0	0	0	0	0	0	0	0	0	0	0	0	0	0	0	0	0	0	0	1	0	0	0	0	0	0	0	0	0	0	0	0	0	0	0	0
AC007106.1	40	mediumpurple3	0	0	0	0	0	0	0	0	0	0	0	0	0	0	0	0	0	0	0	1	0	0	0	0	0	0	0	0	0	0	0	0	0	0	0	0	0	0	0	0	0
AC007128.1	6	red	0	0	0	0	0	0	0	0	0	0	0	0	0	0	0	0	0	0	0	0	0	0	0	0	0	0	0	1	0	0	0	0	0	0	0	0	0	0	0	0	0
AC007163.3	12	tan	0	0	0	0	0	0	0	0	0	0	0	0	0	0	0	0	0	0	0	0	0	0	0	0	0	0	0	0	0	0	0	0	0	0	0	1	0	0	0	0	0
AC007163.8	0	grey	0	0	0	0	0	0	0	0	0	0	0	0	0	1	0	0	0	0	0	0	0	0	0	0	0	0	0	0	0	0	0	0	0	0	0	0	0	0	0	0	0
AC007237.2	24	darkgrey	0	0	0	0	0	1	0	0	0	0	0	0	0	0	0	0	0	0	0	0	0	0	0	0	0	0	0	0	0	0	0	0	0	0	0	0	0	0	0	0	0
AC007238.1	1	turquoise	0	0	0	0	0	0	0	0	0	0	0	0	0	0	0	0	0	0	0	0	0	0	0	0	0	0	0	0	0	0	0	0	0	0	0	0	1	0	0	0	0
AC007246.3	2	blue	0	1	0	0	0	0	0	0	0	0	0	0	0	0	0	0	0	0	0	0	0	0	0	0	0	0	0	0	0	0	0	0	0	0	0	0	0	0	0	0	0
AC007249.3	2	blue	0	1	0	0	0	0	0	0	0	0	0	0	0	0	0	0	0	0	0	0	0	0	0	0	0	0	0	0	0	0	0	0	0	0	0	0	0	0	0	0	0
AC007250.4	0	grey	0	0	0	0	0	0	0	0	0	0	0	0	0	1	0	0	0	0	0	0	0	0	0	0	0	0	0	0	0	0	0	0	0	0	0	0	0	0	0	0	0
AC007254.3	19	lightyellow	0	0	0	0	0	0	0	0	0	0	0	0	0	0	0	0	0	1	0	0	0	0	0	0	0	0	0	0	0	0	0	0	0	0	0	0	0	0	0	0	0
AC007255.7	1	turquoise	0	0	0	0	0	0	0	0	0	0	0	0	0	0	0	0	0	0	0	0	0	0	0	0	0	0	0	0	0	0	0	0	0	0	0	0	1	0	0	0	0
AC007255.8	11	greenyellow	0	0	0	0	0	0	0	0	0	0	0	0	1	0	0	0	0	0	0	0	0	0	0	0	0	0	0	0	0	0	0	0	0	0	0	0	0	0	0	0	0
AC007256.5	5	green	0	0	0	0	0	0	0	0	0	0	0	1	0	0	0	0	0	0	0	0	0	0	0	0	0	0	0	0	0	0	0	0	0	0	0	0	0	0	0	0	0
AC007276.1	0	grey	0	0	0	0	0	0	0	0	0	0	0	0	0	1	0	0	0	0	0	0	0	0	0	0	0	0	0	0	0	0	0	0	0	0	0	0	0	0	0	0	0
AC007276.5	1	turquoise	0	0	0	0	0	0	0	0	0	0	0	0	0	0	0	0	0	0	0	0	0	0	0	0	0	0	0	0	0	0	0	0	0	0	0	0	1	0	0	0	0
AC007279.2	7	black	1	0	0	0	0	0	0	0	0	0	0	0	0	0	0	0	0	0	0	0	0	0	0	0	0	0	0	0	0	0	0	0	0	0	0	0	0	0	0	0	0
AC007282.1	0	grey	0	0	0	0	0	0	0	0	0	0	0	0	0	1	0	0	0	0	0	0	0	0	0	0	0	0	0	0	0	0	0	0	0	0	0	0	0	0	0	0	0
AC007282.2	0	grey	0	0	0	0	0	0	0	0	0	0	0	0	0	1	0	0	0	0	0	0	0	0	0	0	0	0	0	0	0	0	0	0	0	0	0	0	0	0	0	0	0
AC007283.1	0	grey	0	0	0	0	0	0	0	0	0	0	0	0	0	1	0	0	0	0	0	0	0	0	0	0	0	0	0	0	0	0	0	0	0	0	0	0	0	0	0	0	0
AC007283.2	0	grey	0	0	0	0	0	0	0	0	0	0	0	0	0	1	0	0	0	0	0	0	0	0	0	0	0	0	0	0	0	0	0	0	0	0	0	0	0	0	0	0	0
AC007283.4	10	purple	0	0	0	0	0	0	0	0	0	0	0	0	0	0	0	0	0	0	0	0	0	0	0	0	0	0	1	0	0	0	0	0	0	0	0	0	0	0	0	0	0
AC007283.5	7	black	1	0	0	0	0	0	0	0	0	0	0	0	0	0	0	0	0	0	0	0	0	0	0	0	0	0	0	0	0	0	0	0	0	0	0	0	0	0	0	0	0
AC007285.6	11	greenyellow	0	0	0	0	0	0	0	0	0	0	0	0	1	0	0	0	0	0	0	0	0	0	0	0	0	0	0	0	0	0	0	0	0	0	0	0	0	0	0	0	0
AC007285.7	4	yellow	0	0	0	0	0	0	0	0	0	0	0	0	0	0	0	0	0	0	0	0	0	0	0	0	0	0	0	0	0	0	0	0	0	0	0	0	0	0	0	1	0
AC007308.1	15	midnightblue	0	0	0	0	0	0	0	0	0	0	0	0	0	0	0	0	0	0	0	0	1	0	0	0	0	0	0	0	0	0	0	0	0	0	0	0	0	0	0	0	0
AC007308.6	15	midnightblue	0	0	0	0	0	0	0	0	0	0	0	0	0	0	0	0	0	0	0	0	1	0	0	0	0	0	0	0	0	0	0	0	0	0	0	0	0	0	0	0	0
AC007312.3	1	turquoise	0	0	0	0	0	0	0	0	0	0	0	0	0	0	0	0	0	0	0	0	0	0	0	0	0	0	0	0	0	0	0	0	0	0	0	0	1	0	0	0	0
AC007318.5	5	green	0	0	0	0	0	0	0	0	0	0	0	1	0	0	0	0	0	0	0	0	0	0	0	0	0	0	0	0	0	0	0	0	0	0	0	0	0	0	0	0	0
AC007319.1	13	salmon	0	0	0	0	0	0	0	0	0	0	0	0	0	0	0	0	0	0	0	0	0	0	0	0	0	0	0	0	0	0	1	0	0	0	0	0	0	0	0	0	0
AC007347.1	2	blue	0	1	0	0	0	0	0	0	0	0	0	0	0	0	0	0	0	0	0	0	0	0	0	0	0	0	0	0	0	0	0	0	0	0	0	0	0	0	0	0	0
AC007362.1	27	white	0	0	0	0	0	0	0	0	0	0	0	0	0	0	0	0	0	0	0	0	0	0	0	0	0	0	0	0	0	0	0	0	0	0	0	0	0	0	1	0	0
AC007362.3	27	white	0	0	0	0	0	0	0	0	0	0	0	0	0	0	0	0	0	0	0	0	0	0	0	0	0	0	0	0	0	0	0	0	0	0	0	0	0	0	1	0	0
AC007383.3	11	greenyellow	0	0	0	0	0	0	0	0	0	0	0	0	1	0	0	0	0	0	0	0	0	0	0	0	0	0	0	0	0	0	0	0	0	0	0	0	0	0	0	0	0
AC007383.4	2	blue	0	1	0	0	0	0	0	0	0	0	0	0	0	0	0	0	0	0	0	0	0	0	0	0	0	0	0	0	0	0	0	0	0	0	0	0	0	0	0	0	0
AC007383.5	2	blue	0	1	0	0	0	0	0	0	0	0	0	0	0	0	0	0	0	0	0	0	0	0	0	0	0	0	0	0	0	0	0	0	0	0	0	0	0	0	0	0	0
AC007383.6	6	red	0	0	0	0	0	0	0	0	0	0	0	0	0	0	0	0	0	0	0	0	0	0	0	0	0	0	0	1	0	0	0	0	0	0	0	0	0	0	0	0	0
AC007384.1	7	black	1	0	0	0	0	0	0	0	0	0	0	0	0	0	0	0	0	0	0	0	0	0	0	0	0	0	0	0	0	0	0	0	0	0	0	0	0	0	0	0	0
AC007386.3	7	black	1	0	0	0	0	0	0	0	0	0	0	0	0	0	0	0	0	0	0	0	0	0	0	0	0	0	0	0	0	0	0	0	0	0	0	0	0	0	0	0	0
AC007388.1	5	green	0	0	0	0	0	0	0	0	0	0	0	1	0	0	0	0	0	0	0	0	0	0	0	0	0	0	0	0	0	0	0	0	0	0	0	0	0	0	0	0	0
AC007390.5	6	red	0	0	0	0	0	0	0	0	0	0	0	0	0	0	0	0	0	0	0	0	0	0	0	0	0	0	0	1	0	0	0	0	0	0	0	0	0	0	0	0	0
AC007390.6	4	yellow	0	0	0	0	0	0	0	0	0	0	0	0	0	0	0	0	0	0	0	0	0	0	0	0	0	0	0	0	0	0	0	0	0	0	0	0	0	0	0	1	0
AC007392.3	11	greenyellow	0	0	0	0	0	0	0	0	0	0	0	0	1	0	0	0	0	0	0	0	0	0	0	0	0	0	0	0	0	0	0	0	0	0	0	0	0	0	0	0	0
AC007392.4	11	greenyellow	0	0	0	0	0	0	0	0	0	0	0	0	1	0	0	0	0	0	0	0	0	0	0	0	0	0	0	0	0	0	0	0	0	0	0	0	0	0	0	0	0
AC007395.3	0	grey	0	0	0	0	0	0	0	0	0	0	0	0	0	1	0	0	0	0	0	0	0	0	0	0	0	0	0	0	0	0	0	0	0	0	0	0	0	0	0	0	0
AC007395.4	8	pink	0	0	0	0	0	0	0	0	0	0	0	0	0	0	0	0	0	0	0	0	0	0	0	0	1	0	0	0	0	0	0	0	0	0	0	0	0	0	0	0	0
AC007401.1	2	blue	0	1	0	0	0	0	0	0	0	0	0	0	0	0	0	0	0	0	0	0	0	0	0	0	0	0	0	0	0	0	0	0	0	0	0	0	0	0	0	0	0
AC007401.2	15	midnightblue	0	0	0	0	0	0	0	0	0	0	0	0	0	0	0	0	0	0	0	0	1	0	0	0	0	0	0	0	0	0	0	0	0	0	0	0	0	0	0	0	0
AC007405.2	3	brown	0	0	1	0	0	0	0	0	0	0	0	0	0	0	0	0	0	0	0	0	0	0	0	0	0	0	0	0	0	0	0	0	0	0	0	0	0	0	0	0	0
AC007405.6	3	brown	0	0	1	0	0	0	0	0	0	0	0	0	0	0	0	0	0	0	0	0	0	0	0	0	0	0	0	0	0	0	0	0	0	0	0	0	0	0	0	0	0
AC007405.7	3	brown	0	0	1	0	0	0	0	0	0	0	0	0	0	0	0	0	0	0	0	0	0	0	0	0	0	0	0	0	0	0	0	0	0	0	0	0	0	0	0	0	0
AC007405.8	28	skyblue	0	0	0	0	0	0	0	0	0	0	0	0	0	0	0	0	0	0	0	0	0	0	0	0	0	0	0	0	0	0	0	0	1	0	0	0	0	0	0	0	0
AC007431.1	0	grey	0	0	0	0	0	0	0	0	0	0	0	0	0	1	0	0	0	0	0	0	0	0	0	0	0	0	0	0	0	0	0	0	0	0	0	0	0	0	0	0	0
AC007461.2	3	brown	0	0	1	0	0	0	0	0	0	0	0	0	0	0	0	0	0	0	0	0	0	0	0	0	0	0	0	0	0	0	0	0	0	0	0	0	0	0	0	0	0
AC007495.1	5	green	0	0	0	0	0	0	0	0	0	0	0	1	0	0	0	0	0	0	0	0	0	0	0	0	0	0	0	0	0	0	0	0	0	0	0	0	0	0	0	0	0
AC007537.1	0	grey	0	0	0	0	0	0	0	0	0	0	0	0	0	1	0	0	0	0	0	0	0	0	0	0	0	0	0	0	0	0	0	0	0	0	0	0	0	0	0	0	0
AC007551.3	3	brown	0	0	1	0	0	0	0	0	0	0	0	0	0	0	0	0	0	0	0	0	0	0	0	0	0	0	0	0	0	0	0	0	0	0	0	0	0	0	0	0	0
AC007560.1	14	cyan	0	0	0	1	0	0	0	0	0	0	0	0	0	0	0	0	0	0	0	0	0	0	0	0	0	0	0	0	0	0	0	0	0	0	0	0	0	0	0	0	0
AC007563.5	13	salmon	0	0	0	0	0	0	0	0	0	0	0	0	0	0	0	0	0	0	0	0	0	0	0	0	0	0	0	0	0	0	1	0	0	0	0	0	0	0	0	0	0
AC007566.10	15	midnightblue	0	0	0	0	0	0	0	0	0	0	0	0	0	0	0	0	0	0	0	0	1	0	0	0	0	0	0	0	0	0	0	0	0	0	0	0	0	0	0	0	0
AC007599.1	30	steelblue	0	0	0	0	0	0	0	0	0	0	0	0	0	0	0	0	0	0	0	0	0	0	0	0	0	0	0	0	0	0	0	0	0	0	1	0	0	0	0	0	0
AC007620.3	22	darkgreen	0	0	0	0	1	0	0	0	0	0	0	0	0	0	0	0	0	0	0	0	0	0	0	0	0	0	0	0	0	0	0	0	0	0	0	0	0	0	0	0	0
AC007638.1	1	turquoise	0	0	0	0	0	0	0	0	0	0	0	0	0	0	0	0	0	0	0	0	0	0	0	0	0	0	0	0	0	0	0	0	0	0	0	0	1	0	0	0	0
AC007638.2	2	blue	0	1	0	0	0	0	0	0	0	0	0	0	0	0	0	0	0	0	0	0	0	0	0	0	0	0	0	0	0	0	0	0	0	0	0	0	0	0	0	0	0
AC007639.1	16	lightcyan	0	0	0	0	0	0	0	0	0	0	0	0	0	0	0	1	0	0	0	0	0	0	0	0	0	0	0	0	0	0	0	0	0	0	0	0	0	0	0	0	0
AC007679.3	1	turquoise	0	0	0	0	0	0	0	0	0	0	0	0	0	0	0	0	0	0	0	0	0	0	0	0	0	0	0	0	0	0	0	0	0	0	0	0	1	0	0	0	0
AC007682.2	39	orangered4	0	0	0	0	0	0	0	0	0	0	0	0	0	0	0	0	0	0	0	0	0	0	1	0	0	0	0	0	0	0	0	0	0	0	0	0	0	0	0	0	0
AC007687.1	32	violet	0	0	0	0	0	0	0	0	0	0	0	0	0	0	0	0	0	0	0	0	0	0	0	0	0	0	0	0	0	0	0	0	0	0	0	0	0	1	0	0	0
AC007743.1	19	lightyellow	0	0	0	0	0	0	0	0	0	0	0	0	0	0	0	0	0	1	0	0	0	0	0	0	0	0	0	0	0	0	0	0	0	0	0	0	0	0	0	0	0
AC007750.5	2	blue	0	1	0	0	0	0	0	0	0	0	0	0	0	0	0	0	0	0	0	0	0	0	0	0	0	0	0	0	0	0	0	0	0	0	0	0	0	0	0	0	0
AC007773.1	3	brown	0	0	1	0	0	0	0	0	0	0	0	0	0	0	0	0	0	0	0	0	0	0	0	0	0	0	0	0	0	0	0	0	0	0	0	0	0	0	0	0	0
AC007785.1	15	midnightblue	0	0	0	0	0	0	0	0	0	0	0	0	0	0	0	0	0	0	0	0	1	0	0	0	0	0	0	0	0	0	0	0	0	0	0	0	0	0	0	0	0
AC007834.1	5	green	0	0	0	0	0	0	0	0	0	0	0	1	0	0	0	0	0	0	0	0	0	0	0	0	0	0	0	0	0	0	0	0	0	0	0	0	0	0	0	0	0
AC007842.1	2	blue	0	1	0	0	0	0	0	0	0	0	0	0	0	0	0	0	0	0	0	0	0	0	0	0	0	0	0	0	0	0	0	0	0	0	0	0	0	0	0	0	0
AC007875.2	3	brown	0	0	1	0	0	0	0	0	0	0	0	0	0	0	0	0	0	0	0	0	0	0	0	0	0	0	0	0	0	0	0	0	0	0	0	0	0	0	0	0	0
AC007875.3	8	pink	0	0	0	0	0	0	0	0	0	0	0	0	0	0	0	0	0	0	0	0	0	0	0	0	1	0	0	0	0	0	0	0	0	0	0	0	0	0	0	0	0
AC007879.4	28	skyblue	0	0	0	0	0	0	0	0	0	0	0	0	0	0	0	0	0	0	0	0	0	0	0	0	0	0	0	0	0	0	0	0	1	0	0	0	0	0	0	0	0
AC007883.1	0	grey	0	0	0	0	0	0	0	0	0	0	0	0	0	1	0	0	0	0	0	0	0	0	0	0	0	0	0	0	0	0	0	0	0	0	0	0	0	0	0	0	0
AC007899.3	5	green	0	0	0	0	0	0	0	0	0	0	0	1	0	0	0	0	0	0	0	0	0	0	0	0	0	0	0	0	0	0	0	0	0	0	0	0	0	0	0	0	0
AC007919.18	8	pink	0	0	0	0	0	0	0	0	0	0	0	0	0	0	0	0	0	0	0	0	0	0	0	0	1	0	0	0	0	0	0	0	0	0	0	0	0	0	0	0	0
AC007920.1	22	darkgreen	0	0	0	0	1	0	0	0	0	0	0	0	0	0	0	0	0	0	0	0	0	0	0	0	0	0	0	0	0	0	0	0	0	0	0	0	0	0	0	0	0
AC007956.1	3	brown	0	0	1	0	0	0	0	0	0	0	0	0	0	0	0	0	0	0	0	0	0	0	0	0	0	0	0	0	0	0	0	0	0	0	0	0	0	0	0	0	0
AC007969.4	0	grey	0	0	0	0	0	0	0	0	0	0	0	0	0	1	0	0	0	0	0	0	0	0	0	0	0	0	0	0	0	0	0	0	0	0	0	0	0	0	0	0	0
AC007969.5	10	purple	0	0	0	0	0	0	0	0	0	0	0	0	0	0	0	0	0	0	0	0	0	0	0	0	0	0	1	0	0	0	0	0	0	0	0	0	0	0	0	0	0
AC007970.1	2	blue	0	1	0	0	0	0	0	0	0	0	0	0	0	0	0	0	0	0	0	0	0	0	0	0	0	0	0	0	0	0	0	0	0	0	0	0	0	0	0	0	0
AC008060.5	11	greenyellow	0	0	0	0	0	0	0	0	0	0	0	0	1	0	0	0	0	0	0	0	0	0	0	0	0	0	0	0	0	0	0	0	0	0	0	0	0	0	0	0	0
AC008060.7	11	greenyellow	0	0	0	0	0	0	0	0	0	0	0	0	1	0	0	0	0	0	0	0	0	0	0	0	0	0	0	0	0	0	0	0	0	0	0	0	0	0	0	0	0
AC008060.8	11	greenyellow	0	0	0	0	0	0	0	0	0	0	0	0	1	0	0	0	0	0	0	0	0	0	0	0	0	0	0	0	0	0	0	0	0	0	0	0	0	0	0	0	0
AC008069.1	1	turquoise	0	0	0	0	0	0	0	0	0	0	0	0	0	0	0	0	0	0	0	0	0	0	0	0	0	0	0	0	0	0	0	0	0	0	0	0	1	0	0	0	0
AC008070.1	4	yellow	0	0	0	0	0	0	0	0	0	0	0	0	0	0	0	0	0	0	0	0	0	0	0	0	0	0	0	0	0	0	0	0	0	0	0	0	0	0	0	1	0
AC008073.5	5	green	0	0	0	0	0	0	0	0	0	0	0	1	0	0	0	0	0	0	0	0	0	0	0	0	0	0	0	0	0	0	0	0	0	0	0	0	0	0	0	0	0
AC008073.6	6	red	0	0	0	0	0	0	0	0	0	0	0	0	0	0	0	0	0	0	0	0	0	0	0	0	0	0	0	1	0	0	0	0	0	0	0	0	0	0	0	0	0
AC008073.9	17	grey60	0	0	0	0	0	0	0	0	0	0	0	0	0	0	1	0	0	0	0	0	0	0	0	0	0	0	0	0	0	0	0	0	0	0	0	0	0	0	0	0	0
AC008074.3	0	grey	0	0	0	0	0	0	0	0	0	0	0	0	0	1	0	0	0	0	0	0	0	0	0	0	0	0	0	0	0	0	0	0	0	0	0	0	0	0	0	0	0
AC008088.2	17	grey60	0	0	0	0	0	0	0	0	0	0	0	0	0	0	1	0	0	0	0	0	0	0	0	0	0	0	0	0	0	0	0	0	0	0	0	0	0	0	0	0	0
AC008105.1	2	blue	0	1	0	0	0	0	0	0	0	0	0	0	0	0	0	0	0	0	0	0	0	0	0	0	0	0	0	0	0	0	0	0	0	0	0	0	0	0	0	0	0
AC008122.1	0	grey	0	0	0	0	0	0	0	0	0	0	0	0	0	1	0	0	0	0	0	0	0	0	0	0	0	0	0	0	0	0	0	0	0	0	0	0	0	0	0	0	0
AC008147.2	0	grey	0	0	0	0	0	0	0	0	0	0	0	0	0	1	0	0	0	0	0	0	0	0	0	0	0	0	0	0	0	0	0	0	0	0	0	0	0	0	0	0	0
AC008155.1	4	yellow	0	0	0	0	0	0	0	0	0	0	0	0	0	0	0	0	0	0	0	0	0	0	0	0	0	0	0	0	0	0	0	0	0	0	0	0	0	0	0	1	0
AC008174.3	15	midnightblue	0	0	0	0	0	0	0	0	0	0	0	0	0	0	0	0	0	0	0	0	1	0	0	0	0	0	0	0	0	0	0	0	0	0	0	0	0	0	0	0	0
AC008277.1	1	turquoise	0	0	0	0	0	0	0	0	0	0	0	0	0	0	0	0	0	0	0	0	0	0	0	0	0	0	0	0	0	0	0	0	0	0	0	0	1	0	0	0	0
AC008280.1	0	grey	0	0	0	0	0	0	0	0	0	0	0	0	0	1	0	0	0	0	0	0	0	0	0	0	0	0	0	0	0	0	0	0	0	0	0	0	0	0	0	0	0
AC008280.3	0	grey	0	0	0	0	0	0	0	0	0	0	0	0	0	1	0	0	0	0	0	0	0	0	0	0	0	0	0	0	0	0	0	0	0	0	0	0	0	0	0	0	0
AC008280.5	3	brown	0	0	1	0	0	0	0	0	0	0	0	0	0	0	0	0	0	0	0	0	0	0	0	0	0	0	0	0	0	0	0	0	0	0	0	0	0	0	0	0	0
AC008392.1	3	brown	0	0	1	0	0	0	0	0	0	0	0	0	0	0	0	0	0	0	0	0	0	0	0	0	0	0	0	0	0	0	0	0	0	0	0	0	0	0	0	0	0
AC008427.2	6	red	0	0	0	0	0	0	0	0	0	0	0	0	0	0	0	0	0	0	0	0	0	0	0	0	0	0	0	1	0	0	0	0	0	0	0	0	0	0	0	0	0
AC008434.1	0	grey	0	0	0	0	0	0	0	0	0	0	0	0	0	1	0	0	0	0	0	0	0	0	0	0	0	0	0	0	0	0	0	0	0	0	0	0	0	0	0	0	0
AC008434.2	3	brown	0	0	1	0	0	0	0	0	0	0	0	0	0	0	0	0	0	0	0	0	0	0	0	0	0	0	0	0	0	0	0	0	0	0	0	0	0	0	0	0	0
AC008440.10	12	tan	0	0	0	0	0	0	0	0	0	0	0	0	0	0	0	0	0	0	0	0	0	0	0	0	0	0	0	0	0	0	0	0	0	0	0	1	0	0	0	0	0
AC008440.5	2	blue	0	1	0	0	0	0	0	0	0	0	0	0	0	0	0	0	0	0	0	0	0	0	0	0	0	0	0	0	0	0	0	0	0	0	0	0	0	0	0	0	0
AC008474.2	0	grey	0	0	0	0	0	0	0	0	0	0	0	0	0	1	0	0	0	0	0	0	0	0	0	0	0	0	0	0	0	0	0	0	0	0	0	0	0	0	0	0	0
AC008481.1	29	saddlebrown	0	0	0	0	0	0	0	0	0	0	0	0	0	0	0	0	0	0	0	0	0	0	0	0	0	0	0	0	0	1	0	0	0	0	0	0	0	0	0	0	0
AC008481.2	10	purple	0	0	0	0	0	0	0	0	0	0	0	0	0	0	0	0	0	0	0	0	0	0	0	0	0	0	1	0	0	0	0	0	0	0	0	0	0	0	0	0	0
AC008537.2	1	turquoise	0	0	0	0	0	0	0	0	0	0	0	0	0	0	0	0	0	0	0	0	0	0	0	0	0	0	0	0	0	0	0	0	0	0	0	0	1	0	0	0	0
AC008537.3	2	blue	0	1	0	0	0	0	0	0	0	0	0	0	0	0	0	0	0	0	0	0	0	0	0	0	0	0	0	0	0	0	0	0	0	0	0	0	0	0	0	0	0
AC008567.1	3	brown	0	0	1	0	0	0	0	0	0	0	0	0	0	0	0	0	0	0	0	0	0	0	0	0	0	0	0	0	0	0	0	0	0	0	0	0	0	0	0	0	0
AC008592.3	6	red	0	0	0	0	0	0	0	0	0	0	0	0	0	0	0	0	0	0	0	0	0	0	0	0	0	0	0	1	0	0	0	0	0	0	0	0	0	0	0	0	0
AC008598.1	0	grey	0	0	0	0	0	0	0	0	0	0	0	0	0	1	0	0	0	0	0	0	0	0	0	0	0	0	0	0	0	0	0	0	0	0	0	0	0	0	0	0	0
AC008635.1	0	grey	0	0	0	0	0	0	0	0	0	0	0	0	0	1	0	0	0	0	0	0	0	0	0	0	0	0	0	0	0	0	0	0	0	0	0	0	0	0	0	0	0
AC008670.1	40	mediumpurple3	0	0	0	0	0	0	0	0	0	0	0	0	0	0	0	0	0	0	0	1	0	0	0	0	0	0	0	0	0	0	0	0	0	0	0	0	0	0	0	0	0
AC008670.2	40	mediumpurple3	0	0	0	0	0	0	0	0	0	0	0	0	0	0	0	0	0	0	0	1	0	0	0	0	0	0	0	0	0	0	0	0	0	0	0	0	0	0	0	0	0
AC008670.3	0	grey	0	0	0	0	0	0	0	0	0	0	0	0	0	1	0	0	0	0	0	0	0	0	0	0	0	0	0	0	0	0	0	0	0	0	0	0	0	0	0	0	0
AC008670.4	3	brown	0	0	1	0	0	0	0	0	0	0	0	0	0	0	0	0	0	0	0	0	0	0	0	0	0	0	0	0	0	0	0	0	0	0	0	0	0	0	0	0	0
AC008670.5	3	brown	0	0	1	0	0	0	0	0	0	0	0	0	0	0	0	0	0	0	0	0	0	0	0	0	0	0	0	0	0	0	0	0	0	0	0	0	0	0	0	0	0
AC008671.1	0	grey	0	0	0	0	0	0	0	0	0	0	0	0	0	1	0	0	0	0	0	0	0	0	0	0	0	0	0	0	0	0	0	0	0	0	0	0	0	0	0	0	0
AC008694.2	5	green	0	0	0	0	0	0	0	0	0	0	0	1	0	0	0	0	0	0	0	0	0	0	0	0	0	0	0	0	0	0	0	0	0	0	0	0	0	0	0	0	0
AC008731.1	7	black	1	0	0	0	0	0	0	0	0	0	0	0	0	0	0	0	0	0	0	0	0	0	0	0	0	0	0	0	0	0	0	0	0	0	0	0	0	0	0	0	0
AC008738.1	3	brown	0	0	1	0	0	0	0	0	0	0	0	0	0	0	0	0	0	0	0	0	0	0	0	0	0	0	0	0	0	0	0	0	0	0	0	0	0	0	0	0	0
AC008738.2	3	brown	0	0	1	0	0	0	0	0	0	0	0	0	0	0	0	0	0	0	0	0	0	0	0	0	0	0	0	0	0	0	0	0	0	0	0	0	0	0	0	0	0
AC008746.11	7	black	1	0	0	0	0	0	0	0	0	0	0	0	0	0	0	0	0	0	0	0	0	0	0	0	0	0	0	0	0	0	0	0	0	0	0	0	0	0	0	0	0
AC008746.3	3	brown	0	0	1	0	0	0	0	0	0	0	0	0	0	0	0	0	0	0	0	0	0	0	0	0	0	0	0	0	0	0	0	0	0	0	0	0	0	0	0	0	0
AC008746.5	7	black	1	0	0	0	0	0	0	0	0	0	0	0	0	0	0	0	0	0	0	0	0	0	0	0	0	0	0	0	0	0	0	0	0	0	0	0	0	0	0	0	0
AC008751.1	17	grey60	0	0	0	0	0	0	0	0	0	0	0	0	0	0	1	0	0	0	0	0	0	0	0	0	0	0	0	0	0	0	0	0	0	0	0	0	0	0	0	0	0
AC008751.2	17	grey60	0	0	0	0	0	0	0	0	0	0	0	0	0	0	1	0	0	0	0	0	0	0	0	0	0	0	0	0	0	0	0	0	0	0	0	0	0	0	0	0	0
AC008753.3	18	lightgreen	0	0	0	0	0	0	0	0	0	0	0	0	0	0	0	0	1	0	0	0	0	0	0	0	0	0	0	0	0	0	0	0	0	0	0	0	0	0	0	0	0
AC008759.1	3	brown	0	0	1	0	0	0	0	0	0	0	0	0	0	0	0	0	0	0	0	0	0	0	0	0	0	0	0	0	0	0	0	0	0	0	0	0	0	0	0	0	0
AC008764.1	5	green	0	0	0	0	0	0	0	0	0	0	0	1	0	0	0	0	0	0	0	0	0	0	0	0	0	0	0	0	0	0	0	0	0	0	0	0	0	0	0	0	0
AC008781.7	1	turquoise	0	0	0	0	0	0	0	0	0	0	0	0	0	0	0	0	0	0	0	0	0	0	0	0	0	0	0	0	0	0	0	0	0	0	0	0	1	0	0	0	0
AC008806.2	3	brown	0	0	1	0	0	0	0	0	0	0	0	0	0	0	0	0	0	0	0	0	0	0	0	0	0	0	0	0	0	0	0	0	0	0	0	0	0	0	0	0	0
AC008865.1	2	blue	0	1	0	0	0	0	0	0	0	0	0	0	0	0	0	0	0	0	0	0	0	0	0	0	0	0	0	0	0	0	0	0	0	0	0	0	0	0	0	0	0
AC008888.7	3	brown	0	0	1	0	0	0	0	0	0	0	0	0	0	0	0	0	0	0	0	0	0	0	0	0	0	0	0	0	0	0	0	0	0	0	0	0	0	0	0	0	0
AC008915.1	0	grey	0	0	0	0	0	0	0	0	0	0	0	0	0	1	0	0	0	0	0	0	0	0	0	0	0	0	0	0	0	0	0	0	0	0	0	0	0	0	0	0	0
AC008937.2	1	turquoise	0	0	0	0	0	0	0	0	0	0	0	0	0	0	0	0	0	0	0	0	0	0	0	0	0	0	0	0	0	0	0	0	0	0	0	0	1	0	0	0	0
AC008949.1	0	grey	0	0	0	0	0	0	0	0	0	0	0	0	0	1	0	0	0	0	0	0	0	0	0	0	0	0	0	0	0	0	0	0	0	0	0	0	0	0	0	0	0
AC009041.2	28	skyblue	0	0	0	0	0	0	0	0	0	0	0	0	0	0	0	0	0	0	0	0	0	0	0	0	0	0	0	0	0	0	0	0	1	0	0	0	0	0	0	0	0
AC009053.1	7	black	1	0	0	0	0	0	0	0	0	0	0	0	0	0	0	0	0	0	0	0	0	0	0	0	0	0	0	0	0	0	0	0	0	0	0	0	0	0	0	0	0
AC009060.1	7	black	1	0	0	0	0	0	0	0	0	0	0	0	0	0	0	0	0	0	0	0	0	0	0	0	0	0	0	0	0	0	0	0	0	0	0	0	0	0	0	0	0
AC009061.1	27	white	0	0	0	0	0	0	0	0	0	0	0	0	0	0	0	0	0	0	0	0	0	0	0	0	0	0	0	0	0	0	0	0	0	0	0	0	0	0	1	0	0
AC009065.1	9	magenta	0	0	0	0	0	0	0	0	0	0	0	0	0	0	0	0	0	0	1	0	0	0	0	0	0	0	0	0	0	0	0	0	0	0	0	0	0	0	0	0	0
AC009065.2	0	grey	0	0	0	0	0	0	0	0	0	0	0	0	0	1	0	0	0	0	0	0	0	0	0	0	0	0	0	0	0	0	0	0	0	0	0	0	0	0	0	0	0
AC009086.1	1	turquoise	0	0	0	0	0	0	0	0	0	0	0	0	0	0	0	0	0	0	0	0	0	0	0	0	0	0	0	0	0	0	0	0	0	0	0	0	1	0	0	0	0
AC009095.4	7	black	1	0	0	0	0	0	0	0	0	0	0	0	0	0	0	0	0	0	0	0	0	0	0	0	0	0	0	0	0	0	0	0	0	0	0	0	0	0	0	0	0
AC009107.1	20	royalblue	0	0	0	0	0	0	0	0	0	0	0	0	0	0	0	0	0	0	0	0	0	0	0	0	0	0	0	0	1	0	0	0	0	0	0	0	0	0	0	0	0
AC009108.1	3	brown	0	0	1	0	0	0	0	0	0	0	0	0	0	0	0	0	0	0	0	0	0	0	0	0	0	0	0	0	0	0	0	0	0	0	0	0	0	0	0	0	0
AC009113.1	1	turquoise	0	0	0	0	0	0	0	0	0	0	0	0	0	0	0	0	0	0	0	0	0	0	0	0	0	0	0	0	0	0	0	0	0	0	0	0	1	0	0	0	0
AC009120.3	15	midnightblue	0	0	0	0	0	0	0	0	0	0	0	0	0	0	0	0	0	0	0	0	1	0	0	0	0	0	0	0	0	0	0	0	0	0	0	0	0	0	0	0	0
AC009121.1	29	saddlebrown	0	0	0	0	0	0	0	0	0	0	0	0	0	0	0	0	0	0	0	0	0	0	0	0	0	0	0	0	0	1	0	0	0	0	0	0	0	0	0	0	0
AC009123.1	1	turquoise	0	0	0	0	0	0	0	0	0	0	0	0	0	0	0	0	0	0	0	0	0	0	0	0	0	0	0	0	0	0	0	0	0	0	0	0	1	0	0	0	0
AC009133.1	1	turquoise	0	0	0	0	0	0	0	0	0	0	0	0	0	0	0	0	0	0	0	0	0	0	0	0	0	0	0	0	0	0	0	0	0	0	0	0	1	0	0	0	0
AC009163.1	12	tan	0	0	0	0	0	0	0	0	0	0	0	0	0	0	0	0	0	0	0	0	0	0	0	0	0	0	0	0	0	0	0	0	0	0	0	1	0	0	0	0	0
AC009171.1	13	salmon	0	0	0	0	0	0	0	0	0	0	0	0	0	0	0	0	0	0	0	0	0	0	0	0	0	0	0	0	0	0	1	0	0	0	0	0	0	0	0	0	0
AC009196.1	12	tan	0	0	0	0	0	0	0	0	0	0	0	0	0	0	0	0	0	0	0	0	0	0	0	0	0	0	0	0	0	0	0	0	0	0	0	1	0	0	0	0	0
AC009228.1	15	midnightblue	0	0	0	0	0	0	0	0	0	0	0	0	0	0	0	0	0	0	0	0	1	0	0	0	0	0	0	0	0	0	0	0	0	0	0	0	0	0	0	0	0
AC009229.4	2	blue	0	1	0	0	0	0	0	0	0	0	0	0	0	0	0	0	0	0	0	0	0	0	0	0	0	0	0	0	0	0	0	0	0	0	0	0	0	0	0	0	0
AC009232.2	1	turquoise	0	0	0	0	0	0	0	0	0	0	0	0	0	0	0	0	0	0	0	0	0	0	0	0	0	0	0	0	0	0	0	0	0	0	0	0	1	0	0	0	0
AC009237.1	11	greenyellow	0	0	0	0	0	0	0	0	0	0	0	0	1	0	0	0	0	0	0	0	0	0	0	0	0	0	0	0	0	0	0	0	0	0	0	0	0	0	0	0	0
AC009237.11	11	greenyellow	0	0	0	0	0	0	0	0	0	0	0	0	1	0	0	0	0	0	0	0	0	0	0	0	0	0	0	0	0	0	0	0	0	0	0	0	0	0	0	0	0
AC009237.8	1	turquoise	0	0	0	0	0	0	0	0	0	0	0	0	0	0	0	0	0	0	0	0	0	0	0	0	0	0	0	0	0	0	0	0	0	0	0	0	1	0	0	0	0
AC009237.9	0	grey	0	0	0	0	0	0	0	0	0	0	0	0	0	1	0	0	0	0	0	0	0	0	0	0	0	0	0	0	0	0	0	0	0	0	0	0	0	0	0	0	0
AC009238.6	7	black	1	0	0	0	0	0	0	0	0	0	0	0	0	0	0	0	0	0	0	0	0	0	0	0	0	0	0	0	0	0	0	0	0	0	0	0	0	0	0	0	0
AC009245.3	18	lightgreen	0	0	0	0	0	0	0	0	0	0	0	0	0	0	0	0	1	0	0	0	0	0	0	0	0	0	0	0	0	0	0	0	0	0	0	0	0	0	0	0	0
AC009263.2	8	pink	0	0	0	0	0	0	0	0	0	0	0	0	0	0	0	0	0	0	0	0	0	0	0	0	1	0	0	0	0	0	0	0	0	0	0	0	0	0	0	0	0
AC009274.6	0	grey	0	0	0	0	0	0	0	0	0	0	0	0	0	1	0	0	0	0	0	0	0	0	0	0	0	0	0	0	0	0	0	0	0	0	0	0	0	0	0	0	0
AC009299.4	0	grey	0	0	0	0	0	0	0	0	0	0	0	0	0	1	0	0	0	0	0	0	0	0	0	0	0	0	0	0	0	0	0	0	0	0	0	0	0	0	0	0	0
AC009299.5	1	turquoise	0	0	0	0	0	0	0	0	0	0	0	0	0	0	0	0	0	0	0	0	0	0	0	0	0	0	0	0	0	0	0	0	0	0	0	0	1	0	0	0	0
AC009302.2	5	green	0	0	0	0	0	0	0	0	0	0	0	1	0	0	0	0	0	0	0	0	0	0	0	0	0	0	0	0	0	0	0	0	0	0	0	0	0	0	0	0	0
AC009302.4	28	skyblue	0	0	0	0	0	0	0	0	0	0	0	0	0	0	0	0	0	0	0	0	0	0	0	0	0	0	0	0	0	0	0	0	1	0	0	0	0	0	0	0	0
AC009336.23	12	tan	0	0	0	0	0	0	0	0	0	0	0	0	0	0	0	0	0	0	0	0	0	0	0	0	0	0	0	0	0	0	0	0	0	0	0	1	0	0	0	0	0
AC009336.24	12	tan	0	0	0	0	0	0	0	0	0	0	0	0	0	0	0	0	0	0	0	0	0	0	0	0	0	0	0	0	0	0	0	0	0	0	0	1	0	0	0	0	0
AC009362.2	10	purple	0	0	0	0	0	0	0	0	0	0	0	0	0	0	0	0	0	0	0	0	0	0	0	0	0	0	1	0	0	0	0	0	0	0	0	0	0	0	0	0	0
AC009403.2	7	black	1	0	0	0	0	0	0	0	0	0	0	0	0	0	0	0	0	0	0	0	0	0	0	0	0	0	0	0	0	0	0	0	0	0	0	0	0	0	0	0	0
AC009410.1	0	grey	0	0	0	0	0	0	0	0	0	0	0	0	0	1	0	0	0	0	0	0	0	0	0	0	0	0	0	0	0	0	0	0	0	0	0	0	0	0	0	0	0
AC009413.2	18	lightgreen	0	0	0	0	0	0	0	0	0	0	0	0	0	0	0	0	1	0	0	0	0	0	0	0	0	0	0	0	0	0	0	0	0	0	0	0	0	0	0	0	0
AC009469.1	3	brown	0	0	1	0	0	0	0	0	0	0	0	0	0	0	0	0	0	0	0	0	0	0	0	0	0	0	0	0	0	0	0	0	0	0	0	0	0	0	0	0	0
AC009474.2	0	grey	0	0	0	0	0	0	0	0	0	0	0	0	0	1	0	0	0	0	0	0	0	0	0	0	0	0	0	0	0	0	0	0	0	0	0	0	0	0	0	0	0
AC009475.2	5	green	0	0	0	0	0	0	0	0	0	0	0	1	0	0	0	0	0	0	0	0	0	0	0	0	0	0	0	0	0	0	0	0	0	0	0	0	0	0	0	0	0
AC009480.3	3	brown	0	0	1	0	0	0	0	0	0	0	0	0	0	0	0	0	0	0	0	0	0	0	0	0	0	0	0	0	0	0	0	0	0	0	0	0	0	0	0	0	0
AC009487.4	22	darkgreen	0	0	0	0	1	0	0	0	0	0	0	0	0	0	0	0	0	0	0	0	0	0	0	0	0	0	0	0	0	0	0	0	0	0	0	0	0	0	0	0	0
AC009487.5	22	darkgreen	0	0	0	0	1	0	0	0	0	0	0	0	0	0	0	0	0	0	0	0	0	0	0	0	0	0	0	0	0	0	0	0	0	0	0	0	0	0	0	0	0
AC009487.6	1	turquoise	0	0	0	0	0	0	0	0	0	0	0	0	0	0	0	0	0	0	0	0	0	0	0	0	0	0	0	0	0	0	0	0	0	0	0	0	1	0	0	0	0
AC009492.1	2	blue	0	1	0	0	0	0	0	0	0	0	0	0	0	0	0	0	0	0	0	0	0	0	0	0	0	0	0	0	0	0	0	0	0	0	0	0	0	0	0	0	0
AC009495.4	0	grey	0	0	0	0	0	0	0	0	0	0	0	0	0	1	0	0	0	0	0	0	0	0	0	0	0	0	0	0	0	0	0	0	0	0	0	0	0	0	0	0	0
AC009501.4	1	turquoise	0	0	0	0	0	0	0	0	0	0	0	0	0	0	0	0	0	0	0	0	0	0	0	0	0	0	0	0	0	0	0	0	0	0	0	0	1	0	0	0	0
AC009505.2	1	turquoise	0	0	0	0	0	0	0	0	0	0	0	0	0	0	0	0	0	0	0	0	0	0	0	0	0	0	0	0	0	0	0	0	0	0	0	0	1	0	0	0	0
AC009506.1	16	lightcyan	0	0	0	0	0	0	0	0	0	0	0	0	0	0	0	1	0	0	0	0	0	0	0	0	0	0	0	0	0	0	0	0	0	0	0	0	0	0	0	0	0
AC009506.2	4	yellow	0	0	0	0	0	0	0	0	0	0	0	0	0	0	0	0	0	0	0	0	0	0	0	0	0	0	0	0	0	0	0	0	0	0	0	0	0	0	0	1	0
AC009517.2	10	purple	0	0	0	0	0	0	0	0	0	0	0	0	0	0	0	0	0	0	0	0	0	0	0	0	0	0	1	0	0	0	0	0	0	0	0	0	0	0	0	0	0
AC009530.1	8	pink	0	0	0	0	0	0	0	0	0	0	0	0	0	0	0	0	0	0	0	0	0	0	0	0	1	0	0	0	0	0	0	0	0	0	0	0	0	0	0	0	0
AC009945.3	8	pink	0	0	0	0	0	0	0	0	0	0	0	0	0	0	0	0	0	0	0	0	0	0	0	0	1	0	0	0	0	0	0	0	0	0	0	0	0	0	0	0	0
AC009945.4	3	brown	0	0	1	0	0	0	0	0	0	0	0	0	0	0	0	0	0	0	0	0	0	0	0	0	0	0	0	0	0	0	0	0	0	0	0	0	0	0	0	0	0
AC009948.5	5	green	0	0	0	0	0	0	0	0	0	0	0	1	0	0	0	0	0	0	0	0	0	0	0	0	0	0	0	0	0	0	0	0	0	0	0	0	0	0	0	0	0
AC009948.7	0	grey	0	0	0	0	0	0	0	0	0	0	0	0	0	1	0	0	0	0	0	0	0	0	0	0	0	0	0	0	0	0	0	0	0	0	0	0	0	0	0	0	0
AC009951.1	32	violet	0	0	0	0	0	0	0	0	0	0	0	0	0	0	0	0	0	0	0	0	0	0	0	0	0	0	0	0	0	0	0	0	0	0	0	0	0	1	0	0	0
AC009955.8	0	grey	0	0	0	0	0	0	0	0	0	0	0	0	0	1	0	0	0	0	0	0	0	0	0	0	0	0	0	0	0	0	0	0	0	0	0	0	0	0	0	0	0
AC009961.3	1	turquoise	0	0	0	0	0	0	0	0	0	0	0	0	0	0	0	0	0	0	0	0	0	0	0	0	0	0	0	0	0	0	0	0	0	0	0	0	1	0	0	0	0
AC009963.5	18	lightgreen	0	0	0	0	0	0	0	0	0	0	0	0	0	0	0	0	1	0	0	0	0	0	0	0	0	0	0	0	0	0	0	0	0	0	0	0	0	0	0	0	0
AC009963.6	4	yellow	0	0	0	0	0	0	0	0	0	0	0	0	0	0	0	0	0	0	0	0	0	0	0	0	0	0	0	0	0	0	0	0	0	0	0	0	0	0	0	1	0
AC009970.1	22	darkgreen	0	0	0	0	1	0	0	0	0	0	0	0	0	0	0	0	0	0	0	0	0	0	0	0	0	0	0	0	0	0	0	0	0	0	0	0	0	0	0	0	0
AC010082.1	4	yellow	0	0	0	0	0	0	0	0	0	0	0	0	0	0	0	0	0	0	0	0	0	0	0	0	0	0	0	0	0	0	0	0	0	0	0	0	0	0	0	1	0
AC010095.6	6	red	0	0	0	0	0	0	0	0	0	0	0	0	0	0	0	0	0	0	0	0	0	0	0	0	0	0	0	1	0	0	0	0	0	0	0	0	0	0	0	0	0
AC010095.7	18	lightgreen	0	0	0	0	0	0	0	0	0	0	0	0	0	0	0	0	1	0	0	0	0	0	0	0	0	0	0	0	0	0	0	0	0	0	0	0	0	0	0	0	0
AC010127.3	33	darkolivegreen	0	0	0	0	0	0	0	1	0	0	0	0	0	0	0	0	0	0	0	0	0	0	0	0	0	0	0	0	0	0	0	0	0	0	0	0	0	0	0	0	0
AC010127.4	2	blue	0	1	0	0	0	0	0	0	0	0	0	0	0	0	0	0	0	0	0	0	0	0	0	0	0	0	0	0	0	0	0	0	0	0	0	0	0	0	0	0	0
AC010127.5	1	turquoise	0	0	0	0	0	0	0	0	0	0	0	0	0	0	0	0	0	0	0	0	0	0	0	0	0	0	0	0	0	0	0	0	0	0	0	0	1	0	0	0	0
AC010132.11	8	pink	0	0	0	0	0	0	0	0	0	0	0	0	0	0	0	0	0	0	0	0	0	0	0	0	1	0	0	0	0	0	0	0	0	0	0	0	0	0	0	0	0
AC010150.1	30	steelblue	0	0	0	0	0	0	0	0	0	0	0	0	0	0	0	0	0	0	0	0	0	0	0	0	0	0	0	0	0	0	0	0	0	0	1	0	0	0	0	0	0
AC010170.1	9	magenta	0	0	0	0	0	0	0	0	0	0	0	0	0	0	0	0	0	0	1	0	0	0	0	0	0	0	0	0	0	0	0	0	0	0	0	0	0	0	0	0	0
AC010173.1	0	grey	0	0	0	0	0	0	0	0	0	0	0	0	0	1	0	0	0	0	0	0	0	0	0	0	0	0	0	0	0	0	0	0	0	0	0	0	0	0	0	0	0
AC010203.1	20	royalblue	0	0	0	0	0	0	0	0	0	0	0	0	0	0	0	0	0	0	0	0	0	0	0	0	0	0	0	0	1	0	0	0	0	0	0	0	0	0	0	0	0
AC010226.4	8	pink	0	0	0	0	0	0	0	0	0	0	0	0	0	0	0	0	0	0	0	0	0	0	0	0	1	0	0	0	0	0	0	0	0	0	0	0	0	0	0	0	0
AC010240.3	5	green	0	0	0	0	0	0	0	0	0	0	0	1	0	0	0	0	0	0	0	0	0	0	0	0	0	0	0	0	0	0	0	0	0	0	0	0	0	0	0	0	0
AC010296.1	27	white	0	0	0	0	0	0	0	0	0	0	0	0	0	0	0	0	0	0	0	0	0	0	0	0	0	0	0	0	0	0	0	0	0	0	0	0	0	0	1	0	0
AC010323.1	7	black	1	0	0	0	0	0	0	0	0	0	0	0	0	0	0	0	0	0	0	0	0	0	0	0	0	0	0	0	0	0	0	0	0	0	0	0	0	0	0	0	0
AC010325.1	5	green	0	0	0	0	0	0	0	0	0	0	0	1	0	0	0	0	0	0	0	0	0	0	0	0	0	0	0	0	0	0	0	0	0	0	0	0	0	0	0	0	0
AC010326.1	17	grey60	0	0	0	0	0	0	0	0	0	0	0	0	0	0	1	0	0	0	0	0	0	0	0	0	0	0	0	0	0	0	0	0	0	0	0	0	0	0	0	0	0
AC010327.1	17	grey60	0	0	0	0	0	0	0	0	0	0	0	0	0	0	1	0	0	0	0	0	0	0	0	0	0	0	0	0	0	0	0	0	0	0	0	0	0	0	0	0	0
AC010332.1	17	grey60	0	0	0	0	0	0	0	0	0	0	0	0	0	0	1	0	0	0	0	0	0	0	0	0	0	0	0	0	0	0	0	0	0	0	0	0	0	0	0	0	0
AC010335.1	8	pink	0	0	0	0	0	0	0	0	0	0	0	0	0	0	0	0	0	0	0	0	0	0	0	0	1	0	0	0	0	0	0	0	0	0	0	0	0	0	0	0	0
AC010336.1	9	magenta	0	0	0	0	0	0	0	0	0	0	0	0	0	0	0	0	0	0	1	0	0	0	0	0	0	0	0	0	0	0	0	0	0	0	0	0	0	0	0	0	0
AC010422.1	1	turquoise	0	0	0	0	0	0	0	0	0	0	0	0	0	0	0	0	0	0	0	0	0	0	0	0	0	0	0	0	0	0	0	0	0	0	0	0	1	0	0	0	0
AC010458.1	15	midnightblue	0	0	0	0	0	0	0	0	0	0	0	0	0	0	0	0	0	0	0	0	1	0	0	0	0	0	0	0	0	0	0	0	0	0	0	0	0	0	0	0	0
AC010468.1	18	lightgreen	0	0	0	0	0	0	0	0	0	0	0	0	0	0	0	0	1	0	0	0	0	0	0	0	0	0	0	0	0	0	0	0	0	0	0	0	0	0	0	0	0
AC010468.2	7	black	1	0	0	0	0	0	0	0	0	0	0	0	0	0	0	0	0	0	0	0	0	0	0	0	0	0	0	0	0	0	0	0	0	0	0	0	0	0	0	0	0
AC010492.2	4	yellow	0	0	0	0	0	0	0	0	0	0	0	0	0	0	0	0	0	0	0	0	0	0	0	0	0	0	0	0	0	0	0	0	0	0	0	0	0	0	0	1	0
AC010492.5	4	yellow	0	0	0	0	0	0	0	0	0	0	0	0	0	0	0	0	0	0	0	0	0	0	0	0	0	0	0	0	0	0	0	0	0	0	0	0	0	0	0	1	0
AC010525.1	0	grey	0	0	0	0	0	0	0	0	0	0	0	0	0	1	0	0	0	0	0	0	0	0	0	0	0	0	0	0	0	0	0	0	0	0	0	0	0	0	0	0	0
AC010536.1	17	grey60	0	0	0	0	0	0	0	0	0	0	0	0	0	0	1	0	0	0	0	0	0	0	0	0	0	0	0	0	0	0	0	0	0	0	0	0	0	0	0	0	0
AC010536.2	17	grey60	0	0	0	0	0	0	0	0	0	0	0	0	0	0	1	0	0	0	0	0	0	0	0	0	0	0	0	0	0	0	0	0	0	0	0	0	0	0	0	0	0
AC010591.1	40	mediumpurple3	0	0	0	0	0	0	0	0	0	0	0	0	0	0	0	0	0	0	0	1	0	0	0	0	0	0	0	0	0	0	0	0	0	0	0	0	0	0	0	0	0
AC010615.1	1	turquoise	0	0	0	0	0	0	0	0	0	0	0	0	0	0	0	0	0	0	0	0	0	0	0	0	0	0	0	0	0	0	0	0	0	0	0	0	1	0	0	0	0
AC010615.2	1	turquoise	0	0	0	0	0	0	0	0	0	0	0	0	0	0	0	0	0	0	0	0	0	0	0	0	0	0	0	0	0	0	0	0	0	0	0	0	1	0	0	0	0
AC010620.1	1	turquoise	0	0	0	0	0	0	0	0	0	0	0	0	0	0	0	0	0	0	0	0	0	0	0	0	0	0	0	0	0	0	0	0	0	0	0	0	1	0	0	0	0
AC010627.1	40	mediumpurple3	0	0	0	0	0	0	0	0	0	0	0	0	0	0	0	0	0	0	0	1	0	0	0	0	0	0	0	0	0	0	0	0	0	0	0	0	0	0	0	0	0
AC010646.1	0	grey	0	0	0	0	0	0	0	0	0	0	0	0	0	1	0	0	0	0	0	0	0	0	0	0	0	0	0	0	0	0	0	0	0	0	0	0	0	0	0	0	0
AC010677.5	10	purple	0	0	0	0	0	0	0	0	0	0	0	0	0	0	0	0	0	0	0	0	0	0	0	0	0	0	1	0	0	0	0	0	0	0	0	0	0	0	0	0	0
AC010680.1	2	blue	0	1	0	0	0	0	0	0	0	0	0	0	0	0	0	0	0	0	0	0	0	0	0	0	0	0	0	0	0	0	0	0	0	0	0	0	0	0	0	0	0
AC010729.1	1	turquoise	0	0	0	0	0	0	0	0	0	0	0	0	0	0	0	0	0	0	0	0	0	0	0	0	0	0	0	0	0	0	0	0	0	0	0	0	1	0	0	0	0
AC010729.2	4	yellow	0	0	0	0	0	0	0	0	0	0	0	0	0	0	0	0	0	0	0	0	0	0	0	0	0	0	0	0	0	0	0	0	0	0	0	0	0	0	0	1	0
AC010731.2	7	black	1	0	0	0	0	0	0	0	0	0	0	0	0	0	0	0	0	0	0	0	0	0	0	0	0	0	0	0	0	0	0	0	0	0	0	0	0	0	0	0	0
AC010731.4	25	orange	0	0	0	0	0	0	0	0	0	0	0	0	0	0	0	0	0	0	0	0	0	1	0	0	0	0	0	0	0	0	0	0	0	0	0	0	0	0	0	0	0
AC010733.5	7	black	1	0	0	0	0	0	0	0	0	0	0	0	0	0	0	0	0	0	0	0	0	0	0	0	0	0	0	0	0	0	0	0	0	0	0	0	0	0	0	0	0
AC010761.3	8	pink	0	0	0	0	0	0	0	0	0	0	0	0	0	0	0	0	0	0	0	0	0	0	0	0	1	0	0	0	0	0	0	0	0	0	0	0	0	0	0	0	0
AC010789.1	15	midnightblue	0	0	0	0	0	0	0	0	0	0	0	0	0	0	0	0	0	0	0	0	1	0	0	0	0	0	0	0	0	0	0	0	0	0	0	0	0	0	0	0	0
AC010834.1	1	turquoise	0	0	0	0	0	0	0	0	0	0	0	0	0	0	0	0	0	0	0	0	0	0	0	0	0	0	0	0	0	0	0	0	0	0	0	0	1	0	0	0	0
AC010853.1	0	grey	0	0	0	0	0	0	0	0	0	0	0	0	0	1	0	0	0	0	0	0	0	0	0	0	0	0	0	0	0	0	0	0	0	0	0	0	0	0	0	0	0
AC010878.3	8	pink	0	0	0	0	0	0	0	0	0	0	0	0	0	0	0	0	0	0	0	0	0	0	0	0	1	0	0	0	0	0	0	0	0	0	0	0	0	0	0	0	0
AC010883.5	1	turquoise	0	0	0	0	0	0	0	0	0	0	0	0	0	0	0	0	0	0	0	0	0	0	0	0	0	0	0	0	0	0	0	0	0	0	0	0	1	0	0	0	0
AC010884.1	2	blue	0	1	0	0	0	0	0	0	0	0	0	0	0	0	0	0	0	0	0	0	0	0	0	0	0	0	0	0	0	0	0	0	0	0	0	0	0	0	0	0	0
AC010889.1	4	yellow	0	0	0	0	0	0	0	0	0	0	0	0	0	0	0	0	0	0	0	0	0	0	0	0	0	0	0	0	0	0	0	0	0	0	0	0	0	0	0	1	0
AC010890.1	5	green	0	0	0	0	0	0	0	0	0	0	0	1	0	0	0	0	0	0	0	0	0	0	0	0	0	0	0	0	0	0	0	0	0	0	0	0	0	0	0	0	0
AC010894.3	3	brown	0	0	1	0	0	0	0	0	0	0	0	0	0	0	0	0	0	0	0	0	0	0	0	0	0	0	0	0	0	0	0	0	0	0	0	0	0	0	0	0	0
AC010894.4	6	red	0	0	0	0	0	0	0	0	0	0	0	0	0	0	0	0	0	0	0	0	0	0	0	0	0	0	0	1	0	0	0	0	0	0	0	0	0	0	0	0	0
AC010894.5	12	tan	0	0	0	0	0	0	0	0	0	0	0	0	0	0	0	0	0	0	0	0	0	0	0	0	0	0	0	0	0	0	0	0	0	0	0	1	0	0	0	0	0
AC010904.1	16	lightcyan	0	0	0	0	0	0	0	0	0	0	0	0	0	0	0	1	0	0	0	0	0	0	0	0	0	0	0	0	0	0	0	0	0	0	0	0	0	0	0	0	0
AC010913.1	11	greenyellow	0	0	0	0	0	0	0	0	0	0	0	0	1	0	0	0	0	0	0	0	0	0	0	0	0	0	0	0	0	0	0	0	0	0	0	0	0	0	0	0	0
AC010931.2	9	magenta	0	0	0	0	0	0	0	0	0	0	0	0	0	0	0	0	0	0	1	0	0	0	0	0	0	0	0	0	0	0	0	0	0	0	0	0	0	0	0	0	0
AC010975.1	5	green	0	0	0	0	0	0	0	0	0	0	0	1	0	0	0	0	0	0	0	0	0	0	0	0	0	0	0	0	0	0	0	0	0	0	0	0	0	0	0	0	0
AC010980.2	2	blue	0	1	0	0	0	0	0	0	0	0	0	0	0	0	0	0	0	0	0	0	0	0	0	0	0	0	0	0	0	0	0	0	0	0	0	0	0	0	0	0	0
AC010984.3	33	darkolivegreen	0	0	0	0	0	0	0	1	0	0	0	0	0	0	0	0	0	0	0	0	0	0	0	0	0	0	0	0	0	0	0	0	0	0	0	0	0	0	0	0	0
AC010984.4	33	darkolivegreen	0	0	0	0	0	0	0	1	0	0	0	0	0	0	0	0	0	0	0	0	0	0	0	0	0	0	0	0	0	0	0	0	0	0	0	0	0	0	0	0	0
AC010997.1	28	skyblue	0	0	0	0	0	0	0	0	0	0	0	0	0	0	0	0	0	0	0	0	0	0	0	0	0	0	0	0	0	0	0	0	1	0	0	0	0	0	0	0	0
AC011037.1	9	magenta	0	0	0	0	0	0	0	0	0	0	0	0	0	0	0	0	0	0	1	0	0	0	0	0	0	0	0	0	0	0	0	0	0	0	0	0	0	0	0	0	0
AC011139.1	10	purple	0	0	0	0	0	0	0	0	0	0	0	0	0	0	0	0	0	0	0	0	0	0	0	0	0	0	1	0	0	0	0	0	0	0	0	0	0	0	0	0	0
AC011236.7	5	green	0	0	0	0	0	0	0	0	0	0	0	1	0	0	0	0	0	0	0	0	0	0	0	0	0	0	0	0	0	0	0	0	0	0	0	0	0	0	0	0	0
AC011242.6	3	brown	0	0	1	0	0	0	0	0	0	0	0	0	0	0	0	0	0	0	0	0	0	0	0	0	0	0	0	0	0	0	0	0	0	0	0	0	0	0	0	0	0
AC011247.3	1	turquoise	0	0	0	0	0	0	0	0	0	0	0	0	0	0	0	0	0	0	0	0	0	0	0	0	0	0	0	0	0	0	0	0	0	0	0	0	1	0	0	0	0
AC011288.2	2	blue	0	1	0	0	0	0	0	0	0	0	0	0	0	0	0	0	0	0	0	0	0	0	0	0	0	0	0	0	0	0	0	0	0	0	0	0	0	0	0	0	0
AC011290.5	4	yellow	0	0	0	0	0	0	0	0	0	0	0	0	0	0	0	0	0	0	0	0	0	0	0	0	0	0	0	0	0	0	0	0	0	0	0	0	0	0	0	1	0
AC011306.2	27	white	0	0	0	0	0	0	0	0	0	0	0	0	0	0	0	0	0	0	0	0	0	0	0	0	0	0	0	0	0	0	0	0	0	0	0	0	0	0	1	0	0
AC011322.1	2	blue	0	1	0	0	0	0	0	0	0	0	0	0	0	0	0	0	0	0	0	0	0	0	0	0	0	0	0	0	0	0	0	0	0	0	0	0	0	0	0	0	0
AC011330.12	11	greenyellow	0	0	0	0	0	0	0	0	0	0	0	0	1	0	0	0	0	0	0	0	0	0	0	0	0	0	0	0	0	0	0	0	0	0	0	0	0	0	0	0	0
AC011330.6	7	black	1	0	0	0	0	0	0	0	0	0	0	0	0	0	0	0	0	0	0	0	0	0	0	0	0	0	0	0	0	0	0	0	0	0	0	0	0	0	0	0	0
AC011385.2	7	black	1	0	0	0	0	0	0	0	0	0	0	0	0	0	0	0	0	0	0	0	0	0	0	0	0	0	0	0	0	0	0	0	0	0	0	0	0	0	0	0	0
AC011442.1	7	black	1	0	0	0	0	0	0	0	0	0	0	0	0	0	0	0	0	0	0	0	0	0	0	0	0	0	0	0	0	0	0	0	0	0	0	0	0	0	0	0	0
AC011443.1	11	greenyellow	0	0	0	0	0	0	0	0	0	0	0	0	1	0	0	0	0	0	0	0	0	0	0	0	0	0	0	0	0	0	0	0	0	0	0	0	0	0	0	0	0
AC011450.1	3	brown	0	0	1	0	0	0	0	0	0	0	0	0	0	0	0	0	0	0	0	0	0	0	0	0	0	0	0	0	0	0	0	0	0	0	0	0	0	0	0	0	0
AC011450.2	5	green	0	0	0	0	0	0	0	0	0	0	0	1	0	0	0	0	0	0	0	0	0	0	0	0	0	0	0	0	0	0	0	0	0	0	0	0	0	0	0	0	0
AC011460.1	24	darkgrey	0	0	0	0	0	1	0	0	0	0	0	0	0	0	0	0	0	0	0	0	0	0	0	0	0	0	0	0	0	0	0	0	0	0	0	0	0	0	0	0	0
AC011474.1	9	magenta	0	0	0	0	0	0	0	0	0	0	0	0	0	0	0	0	0	0	1	0	0	0	0	0	0	0	0	0	0	0	0	0	0	0	0	0	0	0	0	0	0
AC011475.1	3	brown	0	0	1	0	0	0	0	0	0	0	0	0	0	0	0	0	0	0	0	0	0	0	0	0	0	0	0	0	0	0	0	0	0	0	0	0	0	0	0	0	0
AC011475.2	7	black	1	0	0	0	0	0	0	0	0	0	0	0	0	0	0	0	0	0	0	0	0	0	0	0	0	0	0	0	0	0	0	0	0	0	0	0	0	0	0	0	0
AC011477.1	8	pink	0	0	0	0	0	0	0	0	0	0	0	0	0	0	0	0	0	0	0	0	0	0	0	0	1	0	0	0	0	0	0	0	0	0	0	0	0	0	0	0	0
AC011477.2	1	turquoise	0	0	0	0	0	0	0	0	0	0	0	0	0	0	0	0	0	0	0	0	0	0	0	0	0	0	0	0	0	0	0	0	0	0	0	0	1	0	0	0	0
AC011479.1	7	black	1	0	0	0	0	0	0	0	0	0	0	0	0	0	0	0	0	0	0	0	0	0	0	0	0	0	0	0	0	0	0	0	0	0	0	0	0	0	0	0	0
AC011481.1	3	brown	0	0	1	0	0	0	0	0	0	0	0	0	0	0	0	0	0	0	0	0	0	0	0	0	0	0	0	0	0	0	0	0	0	0	0	0	0	0	0	0	0
AC011483.1	0	grey	0	0	0	0	0	0	0	0	0	0	0	0	0	1	0	0	0	0	0	0	0	0	0	0	0	0	0	0	0	0	0	0	0	0	0	0	0	0	0	0	0
AC011484.1	2	blue	0	1	0	0	0	0	0	0	0	0	0	0	0	0	0	0	0	0	0	0	0	0	0	0	0	0	0	0	0	0	0	0	0	0	0	0	0	0	0	0	0
AC011496.1	0	grey	0	0	0	0	0	0	0	0	0	0	0	0	0	1	0	0	0	0	0	0	0	0	0	0	0	0	0	0	0	0	0	0	0	0	0	0	0	0	0	0	0
AC011497.1	28	skyblue	0	0	0	0	0	0	0	0	0	0	0	0	0	0	0	0	0	0	0	0	0	0	0	0	0	0	0	0	0	0	0	0	1	0	0	0	0	0	0	0	0
AC011498.1	1	turquoise	0	0	0	0	0	0	0	0	0	0	0	0	0	0	0	0	0	0	0	0	0	0	0	0	0	0	0	0	0	0	0	0	0	0	0	0	1	0	0	0	0
AC011500.1	17	grey60	0	0	0	0	0	0	0	0	0	0	0	0	0	0	1	0	0	0	0	0	0	0	0	0	0	0	0	0	0	0	0	0	0	0	0	0	0	0	0	0	0
AC011509.1	0	grey	0	0	0	0	0	0	0	0	0	0	0	0	0	1	0	0	0	0	0	0	0	0	0	0	0	0	0	0	0	0	0	0	0	0	0	0	0	0	0	0	0
AC011510.1	3	brown	0	0	1	0	0	0	0	0	0	0	0	0	0	0	0	0	0	0	0	0	0	0	0	0	0	0	0	0	0	0	0	0	0	0	0	0	0	0	0	0	0
AC011533.1	5	green	0	0	0	0	0	0	0	0	0	0	0	1	0	0	0	0	0	0	0	0	0	0	0	0	0	0	0	0	0	0	0	0	0	0	0	0	0	0	0	0	0
AC011537.1	3	brown	0	0	1	0	0	0	0	0	0	0	0	0	0	0	0	0	0	0	0	0	0	0	0	0	0	0	0	0	0	0	0	0	0	0	0	0	0	0	0	0	0
AC011551.1	14	cyan	0	0	0	1	0	0	0	0	0	0	0	0	0	0	0	0	0	0	0	0	0	0	0	0	0	0	0	0	0	0	0	0	0	0	0	0	0	0	0	0	0
AC011625.1	0	grey	0	0	0	0	0	0	0	0	0	0	0	0	0	1	0	0	0	0	0	0	0	0	0	0	0	0	0	0	0	0	0	0	0	0	0	0	0	0	0	0	0
AC011737.2	10	purple	0	0	0	0	0	0	0	0	0	0	0	0	0	0	0	0	0	0	0	0	0	0	0	0	0	0	1	0	0	0	0	0	0	0	0	0	0	0	0	0	0
AC011738.4	8	pink	0	0	0	0	0	0	0	0	0	0	0	0	0	0	0	0	0	0	0	0	0	0	0	0	1	0	0	0	0	0	0	0	0	0	0	0	0	0	0	0	0
AC011742.3	3	brown	0	0	1	0	0	0	0	0	0	0	0	0	0	0	0	0	0	0	0	0	0	0	0	0	0	0	0	0	0	0	0	0	0	0	0	0	0	0	0	0	0
AC011747.7	18	lightgreen	0	0	0	0	0	0	0	0	0	0	0	0	0	0	0	0	1	0	0	0	0	0	0	0	0	0	0	0	0	0	0	0	0	0	0	0	0	0	0	0	0
AC011754.1	2	blue	0	1	0	0	0	0	0	0	0	0	0	0	0	0	0	0	0	0	0	0	0	0	0	0	0	0	0	0	0	0	0	0	0	0	0	0	0	0	0	0	0
AC011816.3	6	red	0	0	0	0	0	0	0	0	0	0	0	0	0	0	0	0	0	0	0	0	0	0	0	0	0	0	0	1	0	0	0	0	0	0	0	0	0	0	0	0	0
AC011816.4	18	lightgreen	0	0	0	0	0	0	0	0	0	0	0	0	0	0	0	0	1	0	0	0	0	0	0	0	0	0	0	0	0	0	0	0	0	0	0	0	0	0	0	0	0
AC011891.5	25	orange	0	0	0	0	0	0	0	0	0	0	0	0	0	0	0	0	0	0	0	0	0	1	0	0	0	0	0	0	0	0	0	0	0	0	0	0	0	0	0	0	0
AC011933.1	9	magenta	0	0	0	0	0	0	0	0	0	0	0	0	0	0	0	0	0	0	1	0	0	0	0	0	0	0	0	0	0	0	0	0	0	0	0	0	0	0	0	0	0
AC011978.1	0	grey	0	0	0	0	0	0	0	0	0	0	0	0	0	1	0	0	0	0	0	0	0	0	0	0	0	0	0	0	0	0	0	0	0	0	0	0	0	0	0	0	0
AC011994.1	0	grey	0	0	0	0	0	0	0	0	0	0	0	0	0	1	0	0	0	0	0	0	0	0	0	0	0	0	0	0	0	0	0	0	0	0	0	0	0	0	0	0	0
AC011995.1	2	blue	0	1	0	0	0	0	0	0	0	0	0	0	0	0	0	0	0	0	0	0	0	0	0	0	0	0	0	0	0	0	0	0	0	0	0	0	0	0	0	0	0
AC011998.4	6	red	0	0	0	0	0	0	0	0	0	0	0	0	0	0	0	0	0	0	0	0	0	0	0	0	0	0	0	1	0	0	0	0	0	0	0	0	0	0	0	0	0
AC012065.5	0	grey	0	0	0	0	0	0	0	0	0	0	0	0	0	1	0	0	0	0	0	0	0	0	0	0	0	0	0	0	0	0	0	0	0	0	0	0	0	0	0	0	0
AC012066.1	0	grey	0	0	0	0	0	0	0	0	0	0	0	0	0	1	0	0	0	0	0	0	0	0	0	0	0	0	0	0	0	0	0	0	0	0	0	0	0	0	0	0	0
AC012074.1	17	grey60	0	0	0	0	0	0	0	0	0	0	0	0	0	0	1	0	0	0	0	0	0	0	0	0	0	0	0	0	0	0	0	0	0	0	0	0	0	0	0	0	0
AC012074.2	17	grey60	0	0	0	0	0	0	0	0	0	0	0	0	0	0	1	0	0	0	0	0	0	0	0	0	0	0	0	0	0	0	0	0	0	0	0	0	0	0	0	0	0
AC012087.1	0	grey	0	0	0	0	0	0	0	0	0	0	0	0	0	1	0	0	0	0	0	0	0	0	0	0	0	0	0	0	0	0	0	0	0	0	0	0	0	0	0	0	0
AC012087.2	1	turquoise	0	0	0	0	0	0	0	0	0	0	0	0	0	0	0	0	0	0	0	0	0	0	0	0	0	0	0	0	0	0	0	0	0	0	0	0	1	0	0	0	0
AC012123.1	1	turquoise	0	0	0	0	0	0	0	0	0	0	0	0	0	0	0	0	0	0	0	0	0	0	0	0	0	0	0	0	0	0	0	0	0	0	0	0	1	0	0	0	0
AC012146.7	6	red	0	0	0	0	0	0	0	0	0	0	0	0	0	0	0	0	0	0	0	0	0	0	0	0	0	0	0	1	0	0	0	0	0	0	0	0	0	0	0	0	0
AC012215.1	3	brown	0	0	1	0	0	0	0	0	0	0	0	0	0	0	0	0	0	0	0	0	0	0	0	0	0	0	0	0	0	0	0	0	0	0	0	0	0	0	0	0	0
AC012307.3	1	turquoise	0	0	0	0	0	0	0	0	0	0	0	0	0	0	0	0	0	0	0	0	0	0	0	0	0	0	0	0	0	0	0	0	0	0	0	0	1	0	0	0	0
AC012309.4	17	grey60	0	0	0	0	0	0	0	0	0	0	0	0	0	0	1	0	0	0	0	0	0	0	0	0	0	0	0	0	0	0	0	0	0	0	0	0	0	0	0	0	0
AC012309.5	0	grey	0	0	0	0	0	0	0	0	0	0	0	0	0	1	0	0	0	0	0	0	0	0	0	0	0	0	0	0	0	0	0	0	0	0	0	0	0	0	0	0	0
AC012313.1	2	blue	0	1	0	0	0	0	0	0	0	0	0	0	0	0	0	0	0	0	0	0	0	0	0	0	0	0	0	0	0	0	0	0	0	0	0	0	0	0	0	0	0
AC012314.1	39	orangered4	0	0	0	0	0	0	0	0	0	0	0	0	0	0	0	0	0	0	0	0	0	0	1	0	0	0	0	0	0	0	0	0	0	0	0	0	0	0	0	0	0
AC012314.6	17	grey60	0	0	0	0	0	0	0	0	0	0	0	0	0	0	1	0	0	0	0	0	0	0	0	0	0	0	0	0	0	0	0	0	0	0	0	0	0	0	0	0	0
AC012314.8	1	turquoise	0	0	0	0	0	0	0	0	0	0	0	0	0	0	0	0	0	0	0	0	0	0	0	0	0	0	0	0	0	0	0	0	0	0	0	0	1	0	0	0	0
AC012317.1	32	violet	0	0	0	0	0	0	0	0	0	0	0	0	0	0	0	0	0	0	0	0	0	0	0	0	0	0	0	0	0	0	0	0	0	0	0	0	0	1	0	0	0
AC012318.1	15	midnightblue	0	0	0	0	0	0	0	0	0	0	0	0	0	0	0	0	0	0	0	0	1	0	0	0	0	0	0	0	0	0	0	0	0	0	0	0	0	0	0	0	0
AC012354.5	25	orange	0	0	0	0	0	0	0	0	0	0	0	0	0	0	0	0	0	0	0	0	0	1	0	0	0	0	0	0	0	0	0	0	0	0	0	0	0	0	0	0	0
AC012354.6	25	orange	0	0	0	0	0	0	0	0	0	0	0	0	0	0	0	0	0	0	0	0	0	1	0	0	0	0	0	0	0	0	0	0	0	0	0	0	0	0	0	0	0
AC012354.8	3	brown	0	0	1	0	0	0	0	0	0	0	0	0	0	0	0	0	0	0	0	0	0	0	0	0	0	0	0	0	0	0	0	0	0	0	0	0	0	0	0	0	0
AC012358.4	2	blue	0	1	0	0	0	0	0	0	0	0	0	0	0	0	0	0	0	0	0	0	0	0	0	0	0	0	0	0	0	0	0	0	0	0	0	0	0	0	0	0	0
AC012358.8	1	turquoise	0	0	0	0	0	0	0	0	0	0	0	0	0	0	0	0	0	0	0	0	0	0	0	0	0	0	0	0	0	0	0	0	0	0	0	0	1	0	0	0	0
AC012363.1	0	grey	0	0	0	0	0	0	0	0	0	0	0	0	0	1	0	0	0	0	0	0	0	0	0	0	0	0	0	0	0	0	0	0	0	0	0	0	0	0	0	0	0
AC012363.10	0	grey	0	0	0	0	0	0	0	0	0	0	0	0	0	1	0	0	0	0	0	0	0	0	0	0	0	0	0	0	0	0	0	0	0	0	0	0	0	0	0	0	0
AC012363.2	0	grey	0	0	0	0	0	0	0	0	0	0	0	0	0	1	0	0	0	0	0	0	0	0	0	0	0	0	0	0	0	0	0	0	0	0	0	0	0	0	0	0	0
AC012363.3	0	grey	0	0	0	0	0	0	0	0	0	0	0	0	0	1	0	0	0	0	0	0	0	0	0	0	0	0	0	0	0	0	0	0	0	0	0	0	0	0	0	0	0
AC012363.4	1	turquoise	0	0	0	0	0	0	0	0	0	0	0	0	0	0	0	0	0	0	0	0	0	0	0	0	0	0	0	0	0	0	0	0	0	0	0	0	1	0	0	0	0
AC012363.7	2	blue	0	1	0	0	0	0	0	0	0	0	0	0	0	0	0	0	0	0	0	0	0	0	0	0	0	0	0	0	0	0	0	0	0	0	0	0	0	0	0	0	0
AC012363.8	6	red	0	0	0	0	0	0	0	0	0	0	0	0	0	0	0	0	0	0	0	0	0	0	0	0	0	0	0	1	0	0	0	0	0	0	0	0	0	0	0	0	0
AC012366.1	8	pink	0	0	0	0	0	0	0	0	0	0	0	0	0	0	0	0	0	0	0	0	0	0	0	0	1	0	0	0	0	0	0	0	0	0	0	0	0	0	0	0	0
AC012379.1	5	green	0	0	0	0	0	0	0	0	0	0	0	1	0	0	0	0	0	0	0	0	0	0	0	0	0	0	0	0	0	0	0	0	0	0	0	0	0	0	0	0	0
AC012435.1	4	yellow	0	0	0	0	0	0	0	0	0	0	0	0	0	0	0	0	0	0	0	0	0	0	0	0	0	0	0	0	0	0	0	0	0	0	0	0	0	0	0	1	0
AC012442.5	24	darkgrey	0	0	0	0	0	1	0	0	0	0	0	0	0	0	0	0	0	0	0	0	0	0	0	0	0	0	0	0	0	0	0	0	0	0	0	0	0	0	0	0	0
AC012442.6	7	black	1	0	0	0	0	0	0	0	0	0	0	0	0	0	0	0	0	0	0	0	0	0	0	0	0	0	0	0	0	0	0	0	0	0	0	0	0	0	0	0	0
AC012456.4	12	tan	0	0	0	0	0	0	0	0	0	0	0	0	0	0	0	0	0	0	0	0	0	0	0	0	0	0	0	0	0	0	0	0	0	0	0	1	0	0	0	0	0
AC012462.1	0	grey	0	0	0	0	0	0	0	0	0	0	0	0	0	1	0	0	0	0	0	0	0	0	0	0	0	0	0	0	0	0	0	0	0	0	0	0	0	0	0	0	0
AC012487.2	2	blue	0	1	0	0	0	0	0	0	0	0	0	0	0	0	0	0	0	0	0	0	0	0	0	0	0	0	0	0	0	0	0	0	0	0	0	0	0	0	0	0	0
AC012490.1	32	violet	0	0	0	0	0	0	0	0	0	0	0	0	0	0	0	0	0	0	0	0	0	0	0	0	0	0	0	0	0	0	0	0	0	0	0	0	0	1	0	0	0
AC012493.1	2	blue	0	1	0	0	0	0	0	0	0	0	0	0	0	0	0	0	0	0	0	0	0	0	0	0	0	0	0	0	0	0	0	0	0	0	0	0	0	0	0	0	0
AC012499.1	0	grey	0	0	0	0	0	0	0	0	0	0	0	0	0	1	0	0	0	0	0	0	0	0	0	0	0	0	0	0	0	0	0	0	0	0	0	0	0	0	0	0	0
AC012501.2	18	lightgreen	0	0	0	0	0	0	0	0	0	0	0	0	0	0	0	0	1	0	0	0	0	0	0	0	0	0	0	0	0	0	0	0	0	0	0	0	0	0	0	0	0
AC012501.3	18	lightgreen	0	0	0	0	0	0	0	0	0	0	0	0	0	0	0	0	1	0	0	0	0	0	0	0	0	0	0	0	0	0	0	0	0	0	0	0	0	0	0	0	0
AC012507.3	25	orange	0	0	0	0	0	0	0	0	0	0	0	0	0	0	0	0	0	0	0	0	0	1	0	0	0	0	0	0	0	0	0	0	0	0	0	0	0	0	0	0	0
AC012507.4	25	orange	0	0	0	0	0	0	0	0	0	0	0	0	0	0	0	0	0	0	0	0	0	1	0	0	0	0	0	0	0	0	0	0	0	0	0	0	0	0	0	0	0
AC012512.1	5	green	0	0	0	0	0	0	0	0	0	0	0	1	0	0	0	0	0	0	0	0	0	0	0	0	0	0	0	0	0	0	0	0	0	0	0	0	0	0	0	0	0
AC012513.3	1	turquoise	0	0	0	0	0	0	0	0	0	0	0	0	0	0	0	0	0	0	0	0	0	0	0	0	0	0	0	0	0	0	0	0	0	0	0	0	1	0	0	0	0
AC012513.6	1	turquoise	0	0	0	0	0	0	0	0	0	0	0	0	0	0	0	0	0	0	0	0	0	0	0	0	0	0	0	0	0	0	0	0	0	0	0	0	1	0	0	0	0
AC012593.1	12	tan	0	0	0	0	0	0	0	0	0	0	0	0	0	0	0	0	0	0	0	0	0	0	0	0	0	0	0	0	0	0	0	0	0	0	0	1	0	0	0	0	0
AC012598.1	0	grey	0	0	0	0	0	0	0	0	0	0	0	0	0	1	0	0	0	0	0	0	0	0	0	0	0	0	0	0	0	0	0	0	0	0	0	0	0	0	0	0	0
AC012613.2	11	greenyellow	0	0	0	0	0	0	0	0	0	0	0	0	1	0	0	0	0	0	0	0	0	0	0	0	0	0	0	0	0	0	0	0	0	0	0	0	0	0	0	0	0
AC012615.1	3	brown	0	0	1	0	0	0	0	0	0	0	0	0	0	0	0	0	0	0	0	0	0	0	0	0	0	0	0	0	0	0	0	0	0	0	0	0	0	0	0	0	0
AC012621.1	32	violet	0	0	0	0	0	0	0	0	0	0	0	0	0	0	0	0	0	0	0	0	0	0	0	0	0	0	0	0	0	0	0	0	0	0	0	0	0	1	0	0	0
AC012645.1	9	magenta	0	0	0	0	0	0	0	0	0	0	0	0	0	0	0	0	0	0	1	0	0	0	0	0	0	0	0	0	0	0	0	0	0	0	0	0	0	0	0	0	0
AC012652.1	2	blue	0	1	0	0	0	0	0	0	0	0	0	0	0	0	0	0	0	0	0	0	0	0	0	0	0	0	0	0	0	0	0	0	0	0	0	0	0	0	0	0	0
AC012671.2	10	purple	0	0	0	0	0	0	0	0	0	0	0	0	0	0	0	0	0	0	0	0	0	0	0	0	0	0	1	0	0	0	0	0	0	0	0	0	0	0	0	0	0
AC013248.1	10	purple	0	0	0	0	0	0	0	0	0	0	0	0	0	0	0	0	0	0	0	0	0	0	0	0	0	0	1	0	0	0	0	0	0	0	0	0	0	0	0	0	0
AC013262.1	0	grey	0	0	0	0	0	0	0	0	0	0	0	0	0	1	0	0	0	0	0	0	0	0	0	0	0	0	0	0	0	0	0	0	0	0	0	0	0	0	0	0	0
AC013264.2	0	grey	0	0	0	0	0	0	0	0	0	0	0	0	0	1	0	0	0	0	0	0	0	0	0	0	0	0	0	0	0	0	0	0	0	0	0	0	0	0	0	0	0
AC013268.5	2	blue	0	1	0	0	0	0	0	0	0	0	0	0	0	0	0	0	0	0	0	0	0	0	0	0	0	0	0	0	0	0	0	0	0	0	0	0	0	0	0	0	0
AC013269.1	1	turquoise	0	0	0	0	0	0	0	0	0	0	0	0	0	0	0	0	0	0	0	0	0	0	0	0	0	0	0	0	0	0	0	0	0	0	0	0	1	0	0	0	0
AC013272.3	12	tan	0	0	0	0	0	0	0	0	0	0	0	0	0	0	0	0	0	0	0	0	0	0	0	0	0	0	0	0	0	0	0	0	0	0	0	1	0	0	0	0	0
AC013275.2	2	blue	0	1	0	0	0	0	0	0	0	0	0	0	0	0	0	0	0	0	0	0	0	0	0	0	0	0	0	0	0	0	0	0	0	0	0	0	0	0	0	0	0
AC013283.1	2	blue	0	1	0	0	0	0	0	0	0	0	0	0	0	0	0	0	0	0	0	0	0	0	0	0	0	0	0	0	0	0	0	0	0	0	0	0	0	0	0	0	0
AC013402.2	9	magenta	0	0	0	0	0	0	0	0	0	0	0	0	0	0	0	0	0	0	1	0	0	0	0	0	0	0	0	0	0	0	0	0	0	0	0	0	0	0	0	0	0
AC013404.1	18	lightgreen	0	0	0	0	0	0	0	0	0	0	0	0	0	0	0	0	1	0	0	0	0	0	0	0	0	0	0	0	0	0	0	0	0	0	0	0	0	0	0	0	0
AC013413.1	15	midnightblue	0	0	0	0	0	0	0	0	0	0	0	0	0	0	0	0	0	0	0	0	1	0	0	0	0	0	0	0	0	0	0	0	0	0	0	0	0	0	0	0	0
AC013439.4	4	yellow	0	0	0	0	0	0	0	0	0	0	0	0	0	0	0	0	0	0	0	0	0	0	0	0	0	0	0	0	0	0	0	0	0	0	0	0	0	0	0	1	0
AC013442.1	6	red	0	0	0	0	0	0	0	0	0	0	0	0	0	0	0	0	0	0	0	0	0	0	0	0	0	0	0	1	0	0	0	0	0	0	0	0	0	0	0	0	0
AC013461.1	16	lightcyan	0	0	0	0	0	0	0	0	0	0	0	0	0	0	0	1	0	0	0	0	0	0	0	0	0	0	0	0	0	0	0	0	0	0	0	0	0	0	0	0	0
AC013463.2	1	turquoise	0	0	0	0	0	0	0	0	0	0	0	0	0	0	0	0	0	0	0	0	0	0	0	0	0	0	0	0	0	0	0	0	0	0	0	0	1	0	0	0	0
AC013468.1	0	grey	0	0	0	0	0	0	0	0	0	0	0	0	0	1	0	0	0	0	0	0	0	0	0	0	0	0	0	0	0	0	0	0	0	0	0	0	0	0	0	0	0
AC013470.6	4	yellow	0	0	0	0	0	0	0	0	0	0	0	0	0	0	0	0	0	0	0	0	0	0	0	0	0	0	0	0	0	0	0	0	0	0	0	0	0	0	0	1	0
AC013472.4	9	magenta	0	0	0	0	0	0	0	0	0	0	0	0	0	0	0	0	0	0	1	0	0	0	0	0	0	0	0	0	0	0	0	0	0	0	0	0	0	0	0	0	0
AC013717.3	18	lightgreen	0	0	0	0	0	0	0	0	0	0	0	0	0	0	0	0	1	0	0	0	0	0	0	0	0	0	0	0	0	0	0	0	0	0	0	0	0	0	0	0	0
AC013718.1	23	darkturquoise	0	0	0	0	0	0	0	0	0	0	1	0	0	0	0	0	0	0	0	0	0	0	0	0	0	0	0	0	0	0	0	0	0	0	0	0	0	0	0	0	0
AC013727.1	1	turquoise	0	0	0	0	0	0	0	0	0	0	0	0	0	0	0	0	0	0	0	0	0	0	0	0	0	0	0	0	0	0	0	0	0	0	0	0	1	0	0	0	0
AC013733.3	11	greenyellow	0	0	0	0	0	0	0	0	0	0	0	0	1	0	0	0	0	0	0	0	0	0	0	0	0	0	0	0	0	0	0	0	0	0	0	0	0	0	0	0	0
AC013733.5	6	red	0	0	0	0	0	0	0	0	0	0	0	0	0	0	0	0	0	0	0	0	0	0	0	0	0	0	0	1	0	0	0	0	0	0	0	0	0	0	0	0	0
AC013791.2	0	grey	0	0	0	0	0	0	0	0	0	0	0	0	0	1	0	0	0	0	0	0	0	0	0	0	0	0	0	0	0	0	0	0	0	0	0	0	0	0	0	0	0
AC015726.1	7	black	1	0	0	0	0	0	0	0	0	0	0	0	0	0	0	0	0	0	0	0	0	0	0	0	0	0	0	0	0	0	0	0	0	0	0	0	0	0	0	0	0
AC015815.2	0	grey	0	0	0	0	0	0	0	0	0	0	0	0	0	1	0	0	0	0	0	0	0	0	0	0	0	0	0	0	0	0	0	0	0	0	0	0	0	0	0	0	0
AC015815.6	5	green	0	0	0	0	0	0	0	0	0	0	0	1	0	0	0	0	0	0	0	0	0	0	0	0	0	0	0	0	0	0	0	0	0	0	0	0	0	0	0	0	0
AC015815.7	32	violet	0	0	0	0	0	0	0	0	0	0	0	0	0	0	0	0	0	0	0	0	0	0	0	0	0	0	0	0	0	0	0	0	0	0	0	0	0	1	0	0	0
AC015818.6	1	turquoise	0	0	0	0	0	0	0	0	0	0	0	0	0	0	0	0	0	0	0	0	0	0	0	0	0	0	0	0	0	0	0	0	0	0	0	0	1	0	0	0	0
AC015818.9	15	midnightblue	0	0	0	0	0	0	0	0	0	0	0	0	0	0	0	0	0	0	0	0	1	0	0	0	0	0	0	0	0	0	0	0	0	0	0	0	0	0	0	0	0
AC015821.1	0	grey	0	0	0	0	0	0	0	0	0	0	0	0	0	1	0	0	0	0	0	0	0	0	0	0	0	0	0	0	0	0	0	0	0	0	0	0	0	0	0	0	0
AC015842.1	6	red	0	0	0	0	0	0	0	0	0	0	0	0	0	0	0	0	0	0	0	0	0	0	0	0	0	0	0	1	0	0	0	0	0	0	0	0	0	0	0	0	0
AC015849.2	5	green	0	0	0	0	0	0	0	0	0	0	0	1	0	0	0	0	0	0	0	0	0	0	0	0	0	0	0	0	0	0	0	0	0	0	0	0	0	0	0	0	0
AC015871.2	9	magenta	0	0	0	0	0	0	0	0	0	0	0	0	0	0	0	0	0	0	1	0	0	0	0	0	0	0	0	0	0	0	0	0	0	0	0	0	0	0	0	0	0
AC015933.2	4	yellow	0	0	0	0	0	0	0	0	0	0	0	0	0	0	0	0	0	0	0	0	0	0	0	0	0	0	0	0	0	0	0	0	0	0	0	0	0	0	0	1	0
AC015936.3	20	royalblue	0	0	0	0	0	0	0	0	0	0	0	0	0	0	0	0	0	0	0	0	0	0	0	0	0	0	0	0	1	0	0	0	0	0	0	0	0	0	0	0	0
AC015959.1	1	turquoise	0	0	0	0	0	0	0	0	0	0	0	0	0	0	0	0	0	0	0	0	0	0	0	0	0	0	0	0	0	0	0	0	0	0	0	0	1	0	0	0	0
AC015971.2	11	greenyellow	0	0	0	0	0	0	0	0	0	0	0	0	1	0	0	0	0	0	0	0	0	0	0	0	0	0	0	0	0	0	0	0	0	0	0	0	0	0	0	0	0
AC015977.5	0	grey	0	0	0	0	0	0	0	0	0	0	0	0	0	1	0	0	0	0	0	0	0	0	0	0	0	0	0	0	0	0	0	0	0	0	0	0	0	0	0	0	0
AC015982.1	0	grey	0	0	0	0	0	0	0	0	0	0	0	0	0	1	0	0	0	0	0	0	0	0	0	0	0	0	0	0	0	0	0	0	0	0	0	0	0	0	0	0	0
AC015987.1	6	red	0	0	0	0	0	0	0	0	0	0	0	0	0	0	0	0	0	0	0	0	0	0	0	0	0	0	0	1	0	0	0	0	0	0	0	0	0	0	0	0	0
AC016182.1	12	tan	0	0	0	0	0	0	0	0	0	0	0	0	0	0	0	0	0	0	0	0	0	0	0	0	0	0	0	0	0	0	0	0	0	0	0	1	0	0	0	0	0
AC016205.1	4	yellow	0	0	0	0	0	0	0	0	0	0	0	0	0	0	0	0	0	0	0	0	0	0	0	0	0	0	0	0	0	0	0	0	0	0	0	0	0	0	0	1	0
AC016292.1	1	turquoise	0	0	0	0	0	0	0	0	0	0	0	0	0	0	0	0	0	0	0	0	0	0	0	0	0	0	0	0	0	0	0	0	0	0	0	0	1	0	0	0	0
AC016292.3	6	red	0	0	0	0	0	0	0	0	0	0	0	0	0	0	0	0	0	0	0	0	0	0	0	0	0	0	0	1	0	0	0	0	0	0	0	0	0	0	0	0	0
AC016405.1	14	cyan	0	0	0	1	0	0	0	0	0	0	0	0	0	0	0	0	0	0	0	0	0	0	0	0	0	0	0	0	0	0	0	0	0	0	0	0	0	0	0	0	0
AC016525.1	7	black	1	0	0	0	0	0	0	0	0	0	0	0	0	0	0	0	0	0	0	0	0	0	0	0	0	0	0	0	0	0	0	0	0	0	0	0	0	0	0	0	0
AC016582.2	9	magenta	0	0	0	0	0	0	0	0	0	0	0	0	0	0	0	0	0	0	1	0	0	0	0	0	0	0	0	0	0	0	0	0	0	0	0	0	0	0	0	0	0
AC016629.2	2	blue	0	1	0	0	0	0	0	0	0	0	0	0	0	0	0	0	0	0	0	0	0	0	0	0	0	0	0	0	0	0	0	0	0	0	0	0	0	0	0	0	0
AC016644.1	1	turquoise	0	0	0	0	0	0	0	0	0	0	0	0	0	0	0	0	0	0	0	0	0	0	0	0	0	0	0	0	0	0	0	0	0	0	0	0	1	0	0	0	0
AC016670.1	0	grey	0	0	0	0	0	0	0	0	0	0	0	0	0	1	0	0	0	0	0	0	0	0	0	0	0	0	0	0	0	0	0	0	0	0	0	0	0	0	0	0	0
AC016683.6	10	purple	0	0	0	0	0	0	0	0	0	0	0	0	0	0	0	0	0	0	0	0	0	0	0	0	0	0	1	0	0	0	0	0	0	0	0	0	0	0	0	0	0
AC016689.1	27	white	0	0	0	0	0	0	0	0	0	0	0	0	0	0	0	0	0	0	0	0	0	0	0	0	0	0	0	0	0	0	0	0	0	0	0	0	0	0	1	0	0
AC016691.2	10	purple	0	0	0	0	0	0	0	0	0	0	0	0	0	0	0	0	0	0	0	0	0	0	0	0	0	0	1	0	0	0	0	0	0	0	0	0	0	0	0	0	0
AC016697.2	24	darkgrey	0	0	0	0	0	1	0	0	0	0	0	0	0	0	0	0	0	0	0	0	0	0	0	0	0	0	0	0	0	0	0	0	0	0	0	0	0	0	0	0	0
AC016697.3	3	brown	0	0	1	0	0	0	0	0	0	0	0	0	0	0	0	0	0	0	0	0	0	0	0	0	0	0	0	0	0	0	0	0	0	0	0	0	0	0	0	0	0
AC016700.4	6	red	0	0	0	0	0	0	0	0	0	0	0	0	0	0	0	0	0	0	0	0	0	0	0	0	0	0	0	1	0	0	0	0	0	0	0	0	0	0	0	0	0
AC016700.5	8	pink	0	0	0	0	0	0	0	0	0	0	0	0	0	0	0	0	0	0	0	0	0	0	0	0	1	0	0	0	0	0	0	0	0	0	0	0	0	0	0	0	0
AC016700.6	10	purple	0	0	0	0	0	0	0	0	0	0	0	0	0	0	0	0	0	0	0	0	0	0	0	0	0	0	1	0	0	0	0	0	0	0	0	0	0	0	0	0	0
AC016708.2	10	purple	0	0	0	0	0	0	0	0	0	0	0	0	0	0	0	0	0	0	0	0	0	0	0	0	0	0	1	0	0	0	0	0	0	0	0	0	0	0	0	0	0
AC016712.2	0	grey	0	0	0	0	0	0	0	0	0	0	0	0	0	1	0	0	0	0	0	0	0	0	0	0	0	0	0	0	0	0	0	0	0	0	0	0	0	0	0	0	0
AC016716.1	4	yellow	0	0	0	0	0	0	0	0	0	0	0	0	0	0	0	0	0	0	0	0	0	0	0	0	0	0	0	0	0	0	0	0	0	0	0	0	0	0	0	1	0
AC016716.2	32	violet	0	0	0	0	0	0	0	0	0	0	0	0	0	0	0	0	0	0	0	0	0	0	0	0	0	0	0	0	0	0	0	0	0	0	0	0	0	1	0	0	0
AC016717.1	22	darkgreen	0	0	0	0	1	0	0	0	0	0	0	0	0	0	0	0	0	0	0	0	0	0	0	0	0	0	0	0	0	0	0	0	0	0	0	0	0	0	0	0	0
AC016722.2	3	brown	0	0	1	0	0	0	0	0	0	0	0	0	0	0	0	0	0	0	0	0	0	0	0	0	0	0	0	0	0	0	0	0	0	0	0	0	0	0	0	0	0
AC016722.4	2	blue	0	1	0	0	0	0	0	0	0	0	0	0	0	0	0	0	0	0	0	0	0	0	0	0	0	0	0	0	0	0	0	0	0	0	0	0	0	0	0	0	0
AC016723.4	1	turquoise	0	0	0	0	0	0	0	0	0	0	0	0	0	0	0	0	0	0	0	0	0	0	0	0	0	0	0	0	0	0	0	0	0	0	0	0	1	0	0	0	0
AC016724.6	1	turquoise	0	0	0	0	0	0	0	0	0	0	0	0	0	0	0	0	0	0	0	0	0	0	0	0	0	0	0	0	0	0	0	0	0	0	0	0	1	0	0	0	0
AC016725.4	1	turquoise	0	0	0	0	0	0	0	0	0	0	0	0	0	0	0	0	0	0	0	0	0	0	0	0	0	0	0	0	0	0	0	0	0	0	0	0	1	0	0	0	0
AC016732.2	8	pink	0	0	0	0	0	0	0	0	0	0	0	0	0	0	0	0	0	0	0	0	0	0	0	0	1	0	0	0	0	0	0	0	0	0	0	0	0	0	0	0	0
AC016734.2	6	red	0	0	0	0	0	0	0	0	0	0	0	0	0	0	0	0	0	0	0	0	0	0	0	0	0	0	0	1	0	0	0	0	0	0	0	0	0	0	0	0	0
AC016735.1	12	tan	0	0	0	0	0	0	0	0	0	0	0	0	0	0	0	0	0	0	0	0	0	0	0	0	0	0	0	0	0	0	0	0	0	0	0	1	0	0	0	0	0
AC016738.3	2	blue	0	1	0	0	0	0	0	0	0	0	0	0	0	0	0	0	0	0	0	0	0	0	0	0	0	0	0	0	0	0	0	0	0	0	0	0	0	0	0	0	0
AC016738.4	2	blue	0	1	0	0	0	0	0	0	0	0	0	0	0	0	0	0	0	0	0	0	0	0	0	0	0	0	0	0	0	0	0	0	0	0	0	0	0	0	0	0	0
AC016739.2	10	purple	0	0	0	0	0	0	0	0	0	0	0	0	0	0	0	0	0	0	0	0	0	0	0	0	0	0	1	0	0	0	0	0	0	0	0	0	0	0	0	0	0
AC016747.3	0	grey	0	0	0	0	0	0	0	0	0	0	0	0	0	1	0	0	0	0	0	0	0	0	0	0	0	0	0	0	0	0	0	0	0	0	0	0	0	0	0	0	0
AC016757.1	2	blue	0	1	0	0	0	0	0	0	0	0	0	0	0	0	0	0	0	0	0	0	0	0	0	0	0	0	0	0	0	0	0	0	0	0	0	0	0	0	0	0	0
AC016757.3	11	greenyellow	0	0	0	0	0	0	0	0	0	0	0	0	1	0	0	0	0	0	0	0	0	0	0	0	0	0	0	0	0	0	0	0	0	0	0	0	0	0	0	0	0
AC016772.4	8	pink	0	0	0	0	0	0	0	0	0	0	0	0	0	0	0	0	0	0	0	0	0	0	0	0	1	0	0	0	0	0	0	0	0	0	0	0	0	0	0	0	0
AC016773.1	4	yellow	0	0	0	0	0	0	0	0	0	0	0	0	0	0	0	0	0	0	0	0	0	0	0	0	0	0	0	0	0	0	0	0	0	0	0	0	0	0	0	1	0
AC016831.7	15	midnightblue	0	0	0	0	0	0	0	0	0	0	0	0	0	0	0	0	0	0	0	0	1	0	0	0	0	0	0	0	0	0	0	0	0	0	0	0	0	0	0	0	0
AC016839.1	4	yellow	0	0	0	0	0	0	0	0	0	0	0	0	0	0	0	0	0	0	0	0	0	0	0	0	0	0	0	0	0	0	0	0	0	0	0	0	0	0	0	1	0
AC016894.1	29	saddlebrown	0	0	0	0	0	0	0	0	0	0	0	0	0	0	0	0	0	0	0	0	0	0	0	0	0	0	0	0	0	1	0	0	0	0	0	0	0	0	0	0	0
AC016910.1	19	lightyellow	0	0	0	0	0	0	0	0	0	0	0	0	0	0	0	0	0	1	0	0	0	0	0	0	0	0	0	0	0	0	0	0	0	0	0	0	0	0	0	0	0
AC016999.2	0	grey	0	0	0	0	0	0	0	0	0	0	0	0	0	1	0	0	0	0	0	0	0	0	0	0	0	0	0	0	0	0	0	0	0	0	0	0	0	0	0	0	0
AC017006.3	15	midnightblue	0	0	0	0	0	0	0	0	0	0	0	0	0	0	0	0	0	0	0	0	1	0	0	0	0	0	0	0	0	0	0	0	0	0	0	0	0	0	0	0	0
AC017028.1	3	brown	0	0	1	0	0	0	0	0	0	0	0	0	0	0	0	0	0	0	0	0	0	0	0	0	0	0	0	0	0	0	0	0	0	0	0	0	0	0	0	0	0
AC017048.3	2	blue	0	1	0	0	0	0	0	0	0	0	0	0	0	0	0	0	0	0	0	0	0	0	0	0	0	0	0	0	0	0	0	0	0	0	0	0	0	0	0	0	0
AC017053.1	17	grey60	0	0	0	0	0	0	0	0	0	0	0	0	0	0	1	0	0	0	0	0	0	0	0	0	0	0	0	0	0	0	0	0	0	0	0	0	0	0	0	0	0
AC017071.1	4	yellow	0	0	0	0	0	0	0	0	0	0	0	0	0	0	0	0	0	0	0	0	0	0	0	0	0	0	0	0	0	0	0	0	0	0	0	0	0	0	0	1	0
AC017074.2	31	paleturquoise	0	0	0	0	0	0	0	0	0	0	0	0	0	0	0	0	0	0	0	0	0	0	0	1	0	0	0	0	0	0	0	0	0	0	0	0	0	0	0	0	0
AC017076.4	2	blue	0	1	0	0	0	0	0	0	0	0	0	0	0	0	0	0	0	0	0	0	0	0	0	0	0	0	0	0	0	0	0	0	0	0	0	0	0	0	0	0	0
AC017080.1	10	purple	0	0	0	0	0	0	0	0	0	0	0	0	0	0	0	0	0	0	0	0	0	0	0	0	0	0	1	0	0	0	0	0	0	0	0	0	0	0	0	0	0
AC017081.2	1	turquoise	0	0	0	0	0	0	0	0	0	0	0	0	0	0	0	0	0	0	0	0	0	0	0	0	0	0	0	0	0	0	0	0	0	0	0	0	1	0	0	0	0
AC017096.1	9	magenta	0	0	0	0	0	0	0	0	0	0	0	0	0	0	0	0	0	0	1	0	0	0	0	0	0	0	0	0	0	0	0	0	0	0	0	0	0	0	0	0	0
AC017099.3	15	midnightblue	0	0	0	0	0	0	0	0	0	0	0	0	0	0	0	0	0	0	0	0	1	0	0	0	0	0	0	0	0	0	0	0	0	0	0	0	0	0	0	0	0
AC017101.10	3	brown	0	0	1	0	0	0	0	0	0	0	0	0	0	0	0	0	0	0	0	0	0	0	0	0	0	0	0	0	0	0	0	0	0	0	0	0	0	0	0	0	0
AC017104.6	7	black	1	0	0	0	0	0	0	0	0	0	0	0	0	0	0	0	0	0	0	0	0	0	0	0	0	0	0	0	0	0	0	0	0	0	0	0	0	0	0	0	0
AC017116.1	9	magenta	0	0	0	0	0	0	0	0	0	0	0	0	0	0	0	0	0	0	1	0	0	0	0	0	0	0	0	0	0	0	0	0	0	0	0	0	0	0	0	0	0
AC017116.11	11	greenyellow	0	0	0	0	0	0	0	0	0	0	0	0	1	0	0	0	0	0	0	0	0	0	0	0	0	0	0	0	0	0	0	0	0	0	0	0	0	0	0	0	0
AC017116.8	4	yellow	0	0	0	0	0	0	0	0	0	0	0	0	0	0	0	0	0	0	0	0	0	0	0	0	0	0	0	0	0	0	0	0	0	0	0	0	0	0	0	1	0
AC018462.3	17	grey60	0	0	0	0	0	0	0	0	0	0	0	0	0	0	1	0	0	0	0	0	0	0	0	0	0	0	0	0	0	0	0	0	0	0	0	0	0	0	0	0	0
AC018463.4	4	yellow	0	0	0	0	0	0	0	0	0	0	0	0	0	0	0	0	0	0	0	0	0	0	0	0	0	0	0	0	0	0	0	0	0	0	0	0	0	0	0	1	0
AC018470.4	28	skyblue	0	0	0	0	0	0	0	0	0	0	0	0	0	0	0	0	0	0	0	0	0	0	0	0	0	0	0	0	0	0	0	0	1	0	0	0	0	0	0	0	0
AC018607.3	30	steelblue	0	0	0	0	0	0	0	0	0	0	0	0	0	0	0	0	0	0	0	0	0	0	0	0	0	0	0	0	0	0	0	0	0	0	1	0	0	0	0	0	0
AC018628.2	17	grey60	0	0	0	0	0	0	0	0	0	0	0	0	0	0	1	0	0	0	0	0	0	0	0	0	0	0	0	0	0	0	0	0	0	0	0	0	0	0	0	0	0
AC018633.4	7	black	1	0	0	0	0	0	0	0	0	0	0	0	0	0	0	0	0	0	0	0	0	0	0	0	0	0	0	0	0	0	0	0	0	0	0	0	0	0	0	0	0
AC018635.1	0	grey	0	0	0	0	0	0	0	0	0	0	0	0	0	1	0	0	0	0	0	0	0	0	0	0	0	0	0	0	0	0	0	0	0	0	0	0	0	0	0	0	0
AC018638.1	7	black	1	0	0	0	0	0	0	0	0	0	0	0	0	0	0	0	0	0	0	0	0	0	0	0	0	0	0	0	0	0	0	0	0	0	0	0	0	0	0	0	0
AC018641.6	6	red	0	0	0	0	0	0	0	0	0	0	0	0	0	0	0	0	0	0	0	0	0	0	0	0	0	0	0	1	0	0	0	0	0	0	0	0	0	0	0	0	0
AC018641.7	15	midnightblue	0	0	0	0	0	0	0	0	0	0	0	0	0	0	0	0	0	0	0	0	1	0	0	0	0	0	0	0	0	0	0	0	0	0	0	0	0	0	0	0	0
AC018642.1	3	brown	0	0	1	0	0	0	0	0	0	0	0	0	0	0	0	0	0	0	0	0	0	0	0	0	0	0	0	0	0	0	0	0	0	0	0	0	0	0	0	0	0
AC018645.1	0	grey	0	0	0	0	0	0	0	0	0	0	0	0	0	1	0	0	0	0	0	0	0	0	0	0	0	0	0	0	0	0	0	0	0	0	0	0	0	0	0	0	0
AC018647.3	12	tan	0	0	0	0	0	0	0	0	0	0	0	0	0	0	0	0	0	0	0	0	0	0	0	0	0	0	0	0	0	0	0	0	0	0	0	1	0	0	0	0	0
AC018665.1	2	blue	0	1	0	0	0	0	0	0	0	0	0	0	0	0	0	0	0	0	0	0	0	0	0	0	0	0	0	0	0	0	0	0	0	0	0	0	0	0	0	0	0
AC018685.1	2	blue	0	1	0	0	0	0	0	0	0	0	0	0	0	0	0	0	0	0	0	0	0	0	0	0	0	0	0	0	0	0	0	0	0	0	0	0	0	0	0	0	0
AC018693.6	3	brown	0	0	1	0	0	0	0	0	0	0	0	0	0	0	0	0	0	0	0	0	0	0	0	0	0	0	0	0	0	0	0	0	0	0	0	0	0	0	0	0	0
AC018696.4	0	grey	0	0	0	0	0	0	0	0	0	0	0	0	0	1	0	0	0	0	0	0	0	0	0	0	0	0	0	0	0	0	0	0	0	0	0	0	0	0	0	0	0
AC018712.2	25	orange	0	0	0	0	0	0	0	0	0	0	0	0	0	0	0	0	0	0	0	0	0	1	0	0	0	0	0	0	0	0	0	0	0	0	0	0	0	0	0	0	0
AC018730.1	1	turquoise	0	0	0	0	0	0	0	0	0	0	0	0	0	0	0	0	0	0	0	0	0	0	0	0	0	0	0	0	0	0	0	0	0	0	0	0	1	0	0	0	0
AC018730.3	4	yellow	0	0	0	0	0	0	0	0	0	0	0	0	0	0	0	0	0	0	0	0	0	0	0	0	0	0	0	0	0	0	0	0	0	0	0	0	0	0	0	1	0
AC018730.4	4	yellow	0	0	0	0	0	0	0	0	0	0	0	0	0	0	0	0	0	0	0	0	0	0	0	0	0	0	0	0	0	0	0	0	0	0	0	0	0	0	0	1	0
AC018735.1	21	darkred	0	0	0	0	0	0	0	0	0	1	0	0	0	0	0	0	0	0	0	0	0	0	0	0	0	0	0	0	0	0	0	0	0	0	0	0	0	0	0	0	0
AC018737.1	12	tan	0	0	0	0	0	0	0	0	0	0	0	0	0	0	0	0	0	0	0	0	0	0	0	0	0	0	0	0	0	0	0	0	0	0	0	1	0	0	0	0	0
AC018738.1	0	grey	0	0	0	0	0	0	0	0	0	0	0	0	0	1	0	0	0	0	0	0	0	0	0	0	0	0	0	0	0	0	0	0	0	0	0	0	0	0	0	0	0
AC018738.2	0	grey	0	0	0	0	0	0	0	0	0	0	0	0	0	1	0	0	0	0	0	0	0	0	0	0	0	0	0	0	0	0	0	0	0	0	0	0	0	0	0	0	0
AC018755.1	7	black	1	0	0	0	0	0	0	0	0	0	0	0	0	0	0	0	0	0	0	0	0	0	0	0	0	0	0	0	0	0	0	0	0	0	0	0	0	0	0	0	0
AC018755.11	11	greenyellow	0	0	0	0	0	0	0	0	0	0	0	0	1	0	0	0	0	0	0	0	0	0	0	0	0	0	0	0	0	0	0	0	0	0	0	0	0	0	0	0	0
AC018797.1	5	green	0	0	0	0	0	0	0	0	0	0	0	1	0	0	0	0	0	0	0	0	0	0	0	0	0	0	0	0	0	0	0	0	0	0	0	0	0	0	0	0	0
AC018799.1	2	blue	0	1	0	0	0	0	0	0	0	0	0	0	0	0	0	0	0	0	0	0	0	0	0	0	0	0	0	0	0	0	0	0	0	0	0	0	0	0	0	0	0
AC018804.6	9	magenta	0	0	0	0	0	0	0	0	0	0	0	0	0	0	0	0	0	0	1	0	0	0	0	0	0	0	0	0	0	0	0	0	0	0	0	0	0	0	0	0	0
AC018804.7	3	brown	0	0	1	0	0	0	0	0	0	0	0	0	0	0	0	0	0	0	0	0	0	0	0	0	0	0	0	0	0	0	0	0	0	0	0	0	0	0	0	0	0
AC018816.3	2	blue	0	1	0	0	0	0	0	0	0	0	0	0	0	0	0	0	0	0	0	0	0	0	0	0	0	0	0	0	0	0	0	0	0	0	0	0	0	0	0	0	0
AC018865.5	22	darkgreen	0	0	0	0	1	0	0	0	0	0	0	0	0	0	0	0	0	0	0	0	0	0	0	0	0	0	0	0	0	0	0	0	0	0	0	0	0	0	0	0	0
AC018890.6	25	orange	0	0	0	0	0	0	0	0	0	0	0	0	0	0	0	0	0	0	0	0	0	1	0	0	0	0	0	0	0	0	0	0	0	0	0	0	0	0	0	0	0
AC018892.1	2	blue	0	1	0	0	0	0	0	0	0	0	0	0	0	0	0	0	0	0	0	0	0	0	0	0	0	0	0	0	0	0	0	0	0	0	0	0	0	0	0	0	0
AC018892.4	11	greenyellow	0	0	0	0	0	0	0	0	0	0	0	0	1	0	0	0	0	0	0	0	0	0	0	0	0	0	0	0	0	0	0	0	0	0	0	0	0	0	0	0	0
AC018924.1	7	black	1	0	0	0	0	0	0	0	0	0	0	0	0	0	0	0	0	0	0	0	0	0	0	0	0	0	0	0	0	0	0	0	0	0	0	0	0	0	0	0	0
AC018926.1	3	brown	0	0	1	0	0	0	0	0	0	0	0	0	0	0	0	0	0	0	0	0	0	0	0	0	0	0	0	0	0	0	0	0	0	0	0	0	0	0	0	0	0
AC018926.2	0	grey	0	0	0	0	0	0	0	0	0	0	0	0	0	1	0	0	0	0	0	0	0	0	0	0	0	0	0	0	0	0	0	0	0	0	0	0	0	0	0	0	0
AC019043.1	0	grey	0	0	0	0	0	0	0	0	0	0	0	0	0	1	0	0	0	0	0	0	0	0	0	0	0	0	0	0	0	0	0	0	0	0	0	0	0	0	0	0	0
AC019068.2	12	tan	0	0	0	0	0	0	0	0	0	0	0	0	0	0	0	0	0	0	0	0	0	0	0	0	0	0	0	0	0	0	0	0	0	0	0	1	0	0	0	0	0
AC019070.1	7	black	1	0	0	0	0	0	0	0	0	0	0	0	0	0	0	0	0	0	0	0	0	0	0	0	0	0	0	0	0	0	0	0	0	0	0	0	0	0	0	0	0
AC019097.7	4	yellow	0	0	0	0	0	0	0	0	0	0	0	0	0	0	0	0	0	0	0	0	0	0	0	0	0	0	0	0	0	0	0	0	0	0	0	0	0	0	0	1	0
AC019109.1	9	magenta	0	0	0	0	0	0	0	0	0	0	0	0	0	0	0	0	0	0	1	0	0	0	0	0	0	0	0	0	0	0	0	0	0	0	0	0	0	0	0	0	0
AC019118.2	15	midnightblue	0	0	0	0	0	0	0	0	0	0	0	0	0	0	0	0	0	0	0	0	1	0	0	0	0	0	0	0	0	0	0	0	0	0	0	0	0	0	0	0	0
AC019118.4	7	black	1	0	0	0	0	0	0	0	0	0	0	0	0	0	0	0	0	0	0	0	0	0	0	0	0	0	0	0	0	0	0	0	0	0	0	0	0	0	0	0	0
AC019129.1	18	lightgreen	0	0	0	0	0	0	0	0	0	0	0	0	0	0	0	0	1	0	0	0	0	0	0	0	0	0	0	0	0	0	0	0	0	0	0	0	0	0	0	0	0
AC019159.1	0	grey	0	0	0	0	0	0	0	0	0	0	0	0	0	1	0	0	0	0	0	0	0	0	0	0	0	0	0	0	0	0	0	0	0	0	0	0	0	0	0	0	0
AC019171.4	0	grey	0	0	0	0	0	0	0	0	0	0	0	0	0	1	0	0	0	0	0	0	0	0	0	0	0	0	0	0	0	0	0	0	0	0	0	0	0	0	0	0	0
AC019172.2	9	magenta	0	0	0	0	0	0	0	0	0	0	0	0	0	0	0	0	0	0	1	0	0	0	0	0	0	0	0	0	0	0	0	0	0	0	0	0	0	0	0	0	0
AC019178.1	4	yellow	0	0	0	0	0	0	0	0	0	0	0	0	0	0	0	0	0	0	0	0	0	0	0	0	0	0	0	0	0	0	0	0	0	0	0	0	0	0	0	1	0
AC019178.2	2	blue	0	1	0	0	0	0	0	0	0	0	0	0	0	0	0	0	0	0	0	0	0	0	0	0	0	0	0	0	0	0	0	0	0	0	0	0	0	0	0	0	0
AC019181.2	3	brown	0	0	1	0	0	0	0	0	0	0	0	0	0	0	0	0	0	0	0	0	0	0	0	0	0	0	0	0	0	0	0	0	0	0	0	0	0	0	0	0	0
AC019181.3	3	brown	0	0	1	0	0	0	0	0	0	0	0	0	0	0	0	0	0	0	0	0	0	0	0	0	0	0	0	0	0	0	0	0	0	0	0	0	0	0	0	0	0
AC019186.1	37	skyblue3	0	0	0	0	0	0	0	0	0	0	0	0	0	0	0	0	0	0	0	0	0	0	0	0	0	0	0	0	0	0	0	0	0	1	0	0	0	0	0	0	0
AC019201.1	4	yellow	0	0	0	0	0	0	0	0	0	0	0	0	0	0	0	0	0	0	0	0	0	0	0	0	0	0	0	0	0	0	0	0	0	0	0	0	0	0	0	1	0
AC019206.1	3	brown	0	0	1	0	0	0	0	0	0	0	0	0	0	0	0	0	0	0	0	0	0	0	0	0	0	0	0	0	0	0	0	0	0	0	0	0	0	0	0	0	0
AC019221.4	1	turquoise	0	0	0	0	0	0	0	0	0	0	0	0	0	0	0	0	0	0	0	0	0	0	0	0	0	0	0	0	0	0	0	0	0	0	0	0	1	0	0	0	0
AC019294.4	21	darkred	0	0	0	0	0	0	0	0	0	1	0	0	0	0	0	0	0	0	0	0	0	0	0	0	0	0	0	0	0	0	0	0	0	0	0	0	0	0	0	0	0
AC019349.5	22	darkgreen	0	0	0	0	1	0	0	0	0	0	0	0	0	0	0	0	0	0	0	0	0	0	0	0	0	0	0	0	0	0	0	0	0	0	0	0	0	0	0	0	0
AC020550.7	0	grey	0	0	0	0	0	0	0	0	0	0	0	0	0	1	0	0	0	0	0	0	0	0	0	0	0	0	0	0	0	0	0	0	0	0	0	0	0	0	0	0	0
AC020581.4	38	plum1	0	0	0	0	0	0	0	0	0	0	0	0	0	0	0	0	0	0	0	0	0	0	0	0	0	1	0	0	0	0	0	0	0	0	0	0	0	0	0	0	0
AC020594.5	12	tan	0	0	0	0	0	0	0	0	0	0	0	0	0	0	0	0	0	0	0	0	0	0	0	0	0	0	0	0	0	0	0	0	0	0	0	1	0	0	0	0	0
AC020629.2	32	violet	0	0	0	0	0	0	0	0	0	0	0	0	0	0	0	0	0	0	0	0	0	0	0	0	0	0	0	0	0	0	0	0	0	0	0	0	0	1	0	0	0
AC020659.1	11	greenyellow	0	0	0	0	0	0	0	0	0	0	0	0	1	0	0	0	0	0	0	0	0	0	0	0	0	0	0	0	0	0	0	0	0	0	0	0	0	0	0	0	0
AC020663.1	26	darkorange	0	0	0	0	0	0	0	0	1	0	0	0	0	0	0	0	0	0	0	0	0	0	0	0	0	0	0	0	0	0	0	0	0	0	0	0	0	0	0	0	0
AC020703.1	0	grey	0	0	0	0	0	0	0	0	0	0	0	0	0	1	0	0	0	0	0	0	0	0	0	0	0	0	0	0	0	0	0	0	0	0	0	0	0	0	0	0	0
AC020763.1	3	brown	0	0	1	0	0	0	0	0	0	0	0	0	0	0	0	0	0	0	0	0	0	0	0	0	0	0	0	0	0	0	0	0	0	0	0	0	0	0	0	0	0
AC020907.1	12	tan	0	0	0	0	0	0	0	0	0	0	0	0	0	0	0	0	0	0	0	0	0	0	0	0	0	0	0	0	0	0	0	0	0	0	0	1	0	0	0	0	0
AC020907.2	3	brown	0	0	1	0	0	0	0	0	0	0	0	0	0	0	0	0	0	0	0	0	0	0	0	0	0	0	0	0	0	0	0	0	0	0	0	0	0	0	0	0	0
AC020907.3	12	tan	0	0	0	0	0	0	0	0	0	0	0	0	0	0	0	0	0	0	0	0	0	0	0	0	0	0	0	0	0	0	0	0	0	0	0	1	0	0	0	0	0
AC020907.6	9	magenta	0	0	0	0	0	0	0	0	0	0	0	0	0	0	0	0	0	0	1	0	0	0	0	0	0	0	0	0	0	0	0	0	0	0	0	0	0	0	0	0	0
AC020910.2	1	turquoise	0	0	0	0	0	0	0	0	0	0	0	0	0	0	0	0	0	0	0	0	0	0	0	0	0	0	0	0	0	0	0	0	0	0	0	0	1	0	0	0	0
AC020911.1	15	midnightblue	0	0	0	0	0	0	0	0	0	0	0	0	0	0	0	0	0	0	0	0	1	0	0	0	0	0	0	0	0	0	0	0	0	0	0	0	0	0	0	0	0
AC020915.1	8	pink	0	0	0	0	0	0	0	0	0	0	0	0	0	0	0	0	0	0	0	0	0	0	0	0	1	0	0	0	0	0	0	0	0	0	0	0	0	0	0	0	0
AC020915.4	6	red	0	0	0	0	0	0	0	0	0	0	0	0	0	0	0	0	0	0	0	0	0	0	0	0	0	0	0	1	0	0	0	0	0	0	0	0	0	0	0	0	0
AC020917.1	7	black	1	0	0	0	0	0	0	0	0	0	0	0	0	0	0	0	0	0	0	0	0	0	0	0	0	0	0	0	0	0	0	0	0	0	0	0	0	0	0	0	0
AC020928.1	28	skyblue	0	0	0	0	0	0	0	0	0	0	0	0	0	0	0	0	0	0	0	0	0	0	0	0	0	0	0	0	0	0	0	0	1	0	0	0	0	0	0	0	0
AC020928.2	0	grey	0	0	0	0	0	0	0	0	0	0	0	0	0	1	0	0	0	0	0	0	0	0	0	0	0	0	0	0	0	0	0	0	0	0	0	0	0	0	0	0	0
AC020983.5	18	lightgreen	0	0	0	0	0	0	0	0	0	0	0	0	0	0	0	0	1	0	0	0	0	0	0	0	0	0	0	0	0	0	0	0	0	0	0	0	0	0	0	0	0
AC021016.6	20	royalblue	0	0	0	0	0	0	0	0	0	0	0	0	0	0	0	0	0	0	0	0	0	0	0	0	0	0	0	0	1	0	0	0	0	0	0	0	0	0	0	0	0
AC021016.7	10	purple	0	0	0	0	0	0	0	0	0	0	0	0	0	0	0	0	0	0	0	0	0	0	0	0	0	0	1	0	0	0	0	0	0	0	0	0	0	0	0	0	0
AC021021.1	1	turquoise	0	0	0	0	0	0	0	0	0	0	0	0	0	0	0	0	0	0	0	0	0	0	0	0	0	0	0	0	0	0	0	0	0	0	0	0	1	0	0	0	0
AC021021.2	1	turquoise	0	0	0	0	0	0	0	0	0	0	0	0	0	0	0	0	0	0	0	0	0	0	0	0	0	0	0	0	0	0	0	0	0	0	0	0	1	0	0	0	0
AC021106.1	4	yellow	0	0	0	0	0	0	0	0	0	0	0	0	0	0	0	0	0	0	0	0	0	0	0	0	0	0	0	0	0	0	0	0	0	0	0	0	0	0	0	1	0
AC021188.4	3	brown	0	0	1	0	0	0	0	0	0	0	0	0	0	0	0	0	0	0	0	0	0	0	0	0	0	0	0	0	0	0	0	0	0	0	0	0	0	0	0	0	0
AC021205.1	0	grey	0	0	0	0	0	0	0	0	0	0	0	0	0	1	0	0	0	0	0	0	0	0	0	0	0	0	0	0	0	0	0	0	0	0	0	0	0	0	0	0	0
AC021224.1	4	yellow	0	0	0	0	0	0	0	0	0	0	0	0	0	0	0	0	0	0	0	0	0	0	0	0	0	0	0	0	0	0	0	0	0	0	0	0	0	0	0	1	0
AC021593.1	12	tan	0	0	0	0	0	0	0	0	0	0	0	0	0	0	0	0	0	0	0	0	0	0	0	0	0	0	0	0	0	0	0	0	0	0	0	1	0	0	0	0	0
AC021593.2	17	grey60	0	0	0	0	0	0	0	0	0	0	0	0	0	0	1	0	0	0	0	0	0	0	0	0	0	0	0	0	0	0	0	0	0	0	0	0	0	0	0	0	0
AC021683.1	2	blue	0	1	0	0	0	0	0	0	0	0	0	0	0	0	0	0	0	0	0	0	0	0	0	0	0	0	0	0	0	0	0	0	0	0	0	0	0	0	0	0	0
AC021860.1	17	grey60	0	0	0	0	0	0	0	0	0	0	0	0	0	0	1	0	0	0	0	0	0	0	0	0	0	0	0	0	0	0	0	0	0	0	0	0	0	0	0	0	0
AC021914.1	3	brown	0	0	1	0	0	0	0	0	0	0	0	0	0	0	0	0	0	0	0	0	0	0	0	0	0	0	0	0	0	0	0	0	0	0	0	0	0	0	0	0	0
AC021914.2	32	violet	0	0	0	0	0	0	0	0	0	0	0	0	0	0	0	0	0	0	0	0	0	0	0	0	0	0	0	0	0	0	0	0	0	0	0	0	0	1	0	0	0
AC022007.4	7	black	1	0	0	0	0	0	0	0	0	0	0	0	0	0	0	0	0	0	0	0	0	0	0	0	0	0	0	0	0	0	0	0	0	0	0	0	0	0	0	0	0
AC022007.5	7	black	1	0	0	0	0	0	0	0	0	0	0	0	0	0	0	0	0	0	0	0	0	0	0	0	0	0	0	0	0	0	0	0	0	0	0	0	0	0	0	0	0
AC022016.1	0	grey	0	0	0	0	0	0	0	0	0	0	0	0	0	1	0	0	0	0	0	0	0	0	0	0	0	0	0	0	0	0	0	0	0	0	0	0	0	0	0	0	0
AC022031.1	0	grey	0	0	0	0	0	0	0	0	0	0	0	0	0	1	0	0	0	0	0	0	0	0	0	0	0	0	0	0	0	0	0	0	0	0	0	0	0	0	0	0	0
AC022098.1	3	brown	0	0	1	0	0	0	0	0	0	0	0	0	0	0	0	0	0	0	0	0	0	0	0	0	0	0	0	0	0	0	0	0	0	0	0	0	0	0	0	0	0
AC022098.2	4	yellow	0	0	0	0	0	0	0	0	0	0	0	0	0	0	0	0	0	0	0	0	0	0	0	0	0	0	0	0	0	0	0	0	0	0	0	0	0	0	0	1	0
AC022098.3	21	darkred	0	0	0	0	0	0	0	0	0	1	0	0	0	0	0	0	0	0	0	0	0	0	0	0	0	0	0	0	0	0	0	0	0	0	0	0	0	0	0	0	0
AC022148.1	0	grey	0	0	0	0	0	0	0	0	0	0	0	0	0	1	0	0	0	0	0	0	0	0	0	0	0	0	0	0	0	0	0	0	0	0	0	0	0	0	0	0	0
AC022148.2	0	grey	0	0	0	0	0	0	0	0	0	0	0	0	0	1	0	0	0	0	0	0	0	0	0	0	0	0	0	0	0	0	0	0	0	0	0	0	0	0	0	0	0
AC022148.3	0	grey	0	0	0	0	0	0	0	0	0	0	0	0	0	1	0	0	0	0	0	0	0	0	0	0	0	0	0	0	0	0	0	0	0	0	0	0	0	0	0	0	0
AC022148.4	0	grey	0	0	0	0	0	0	0	0	0	0	0	0	0	1	0	0	0	0	0	0	0	0	0	0	0	0	0	0	0	0	0	0	0	0	0	0	0	0	0	0	0
AC022148.5	0	grey	0	0	0	0	0	0	0	0	0	0	0	0	0	1	0	0	0	0	0	0	0	0	0	0	0	0	0	0	0	0	0	0	0	0	0	0	0	0	0	0	0
AC022148.6	0	grey	0	0	0	0	0	0	0	0	0	0	0	0	0	1	0	0	0	0	0	0	0	0	0	0	0	0	0	0	0	0	0	0	0	0	0	0	0	0	0	0	0
AC022148.7	0	grey	0	0	0	0	0	0	0	0	0	0	0	0	0	1	0	0	0	0	0	0	0	0	0	0	0	0	0	0	0	0	0	0	0	0	0	0	0	0	0	0	0
AC022182.1	11	greenyellow	0	0	0	0	0	0	0	0	0	0	0	0	1	0	0	0	0	0	0	0	0	0	0	0	0	0	0	0	0	0	0	0	0	0	0	0	0	0	0	0	0
AC022182.2	1	turquoise	0	0	0	0	0	0	0	0	0	0	0	0	0	0	0	0	0	0	0	0	0	0	0	0	0	0	0	0	0	0	0	0	0	0	0	0	1	0	0	0	0
AC022182.3	11	greenyellow	0	0	0	0	0	0	0	0	0	0	0	0	1	0	0	0	0	0	0	0	0	0	0	0	0	0	0	0	0	0	0	0	0	0	0	0	0	0	0	0	0
AC022201.5	1	turquoise	0	0	0	0	0	0	0	0	0	0	0	0	0	0	0	0	0	0	0	0	0	0	0	0	0	0	0	0	0	0	0	0	0	0	0	0	1	0	0	0	0
AC022210.2	18	lightgreen	0	0	0	0	0	0	0	0	0	0	0	0	0	0	0	0	1	0	0	0	0	0	0	0	0	0	0	0	0	0	0	0	0	0	0	0	0	0	0	0	0
AC022400.1	15	midnightblue	0	0	0	0	0	0	0	0	0	0	0	0	0	0	0	0	0	0	0	0	1	0	0	0	0	0	0	0	0	0	0	0	0	0	0	0	0	0	0	0	0
AC022408.1	29	saddlebrown	0	0	0	0	0	0	0	0	0	0	0	0	0	0	0	0	0	0	0	0	0	0	0	0	0	0	0	0	0	1	0	0	0	0	0	0	0	0	0	0	0
AC022409.1	1	turquoise	0	0	0	0	0	0	0	0	0	0	0	0	0	0	0	0	0	0	0	0	0	0	0	0	0	0	0	0	0	0	0	0	0	0	0	0	1	0	0	0	0
AC022413.1	8	pink	0	0	0	0	0	0	0	0	0	0	0	0	0	0	0	0	0	0	0	0	0	0	0	0	1	0	0	0	0	0	0	0	0	0	0	0	0	0	0	0	0
AC022415.1	4	yellow	0	0	0	0	0	0	0	0	0	0	0	0	0	0	0	0	0	0	0	0	0	0	0	0	0	0	0	0	0	0	0	0	0	0	0	0	0	0	0	1	0
AC022415.2	0	grey	0	0	0	0	0	0	0	0	0	0	0	0	0	1	0	0	0	0	0	0	0	0	0	0	0	0	0	0	0	0	0	0	0	0	0	0	0	0	0	0	0
AC022431.1	10	purple	0	0	0	0	0	0	0	0	0	0	0	0	0	0	0	0	0	0	0	0	0	0	0	0	0	0	1	0	0	0	0	0	0	0	0	0	0	0	0	0	0
AC022532.1	2	blue	0	1	0	0	0	0	0	0	0	0	0	0	0	0	0	0	0	0	0	0	0	0	0	0	0	0	0	0	0	0	0	0	0	0	0	0	0	0	0	0	0
AC022558.1	1	turquoise	0	0	0	0	0	0	0	0	0	0	0	0	0	0	0	0	0	0	0	0	0	0	0	0	0	0	0	0	0	0	0	0	0	0	0	0	1	0	0	0	0
AC022596.1	15	midnightblue	0	0	0	0	0	0	0	0	0	0	0	0	0	0	0	0	0	0	0	0	1	0	0	0	0	0	0	0	0	0	0	0	0	0	0	0	0	0	0	0	0
AC022692.1	6	red	0	0	0	0	0	0	0	0	0	0	0	0	0	0	0	0	0	0	0	0	0	0	0	0	0	0	0	1	0	0	0	0	0	0	0	0	0	0	0	0	0
AC022872.2	0	grey	0	0	0	0	0	0	0	0	0	0	0	0	0	1	0	0	0	0	0	0	0	0	0	0	0	0	0	0	0	0	0	0	0	0	0	0	0	0	0	0	0
AC022916.1	0	grey	0	0	0	0	0	0	0	0	0	0	0	0	0	1	0	0	0	0	0	0	0	0	0	0	0	0	0	0	0	0	0	0	0	0	0	0	0	0	0	0	0
AC023055.2	3	brown	0	0	1	0	0	0	0	0	0	0	0	0	0	0	0	0	0	0	0	0	0	0	0	0	0	0	0	0	0	0	0	0	0	0	0	0	0	0	0	0	0
AC023137.2	12	tan	0	0	0	0	0	0	0	0	0	0	0	0	0	0	0	0	0	0	0	0	0	0	0	0	0	0	0	0	0	0	0	0	0	0	0	1	0	0	0	0	0
AC023162.1	30	steelblue	0	0	0	0	0	0	0	0	0	0	0	0	0	0	0	0	0	0	0	0	0	0	0	0	0	0	0	0	0	0	0	0	0	0	1	0	0	0	0	0	0
AC023356.3	6	red	0	0	0	0	0	0	0	0	0	0	0	0	0	0	0	0	0	0	0	0	0	0	0	0	0	0	0	1	0	0	0	0	0	0	0	0	0	0	0	0	0
AC023468.2	10	purple	0	0	0	0	0	0	0	0	0	0	0	0	0	0	0	0	0	0	0	0	0	0	0	0	0	0	1	0	0	0	0	0	0	0	0	0	0	0	0	0	0
AC023480.1	21	darkred	0	0	0	0	0	0	0	0	0	1	0	0	0	0	0	0	0	0	0	0	0	0	0	0	0	0	0	0	0	0	0	0	0	0	0	0	0	0	0	0	0
AC023490.1	14	cyan	0	0	0	1	0	0	0	0	0	0	0	0	0	0	0	0	0	0	0	0	0	0	0	0	0	0	0	0	0	0	0	0	0	0	0	0	0	0	0	0	0
AC023490.2	7	black	1	0	0	0	0	0	0	0	0	0	0	0	0	0	0	0	0	0	0	0	0	0	0	0	0	0	0	0	0	0	0	0	0	0	0	0	0	0	0	0	0
AC023593.1	1	turquoise	0	0	0	0	0	0	0	0	0	0	0	0	0	0	0	0	0	0	0	0	0	0	0	0	0	0	0	0	0	0	0	0	0	0	0	0	1	0	0	0	0
AC023790.1	30	steelblue	0	0	0	0	0	0	0	0	0	0	0	0	0	0	0	0	0	0	0	0	0	0	0	0	0	0	0	0	0	0	0	0	0	0	1	0	0	0	0	0	0
AC023797.1	6	red	0	0	0	0	0	0	0	0	0	0	0	0	0	0	0	0	0	0	0	0	0	0	0	0	0	0	0	1	0	0	0	0	0	0	0	0	0	0	0	0	0
AC023830.1	5	green	0	0	0	0	0	0	0	0	0	0	0	1	0	0	0	0	0	0	0	0	0	0	0	0	0	0	0	0	0	0	0	0	0	0	0	0	0	0	0	0	0
AC024032.1	7	black	1	0	0	0	0	0	0	0	0	0	0	0	0	0	0	0	0	0	0	0	0	0	0	0	0	0	0	0	0	0	0	0	0	0	0	0	0	0	0	0	0
AC024032.2	0	grey	0	0	0	0	0	0	0	0	0	0	0	0	0	1	0	0	0	0	0	0	0	0	0	0	0	0	0	0	0	0	0	0	0	0	0	0	0	0	0	0	0
AC024082.3	0	grey	0	0	0	0	0	0	0	0	0	0	0	0	0	1	0	0	0	0	0	0	0	0	0	0	0	0	0	0	0	0	0	0	0	0	0	0	0	0	0	0	0
AC024168.2	7	black	1	0	0	0	0	0	0	0	0	0	0	0	0	0	0	0	0	0	0	0	0	0	0	0	0	0	0	0	0	0	0	0	0	0	0	0	0	0	0	0	0
AC024270.1	5	green	0	0	0	0	0	0	0	0	0	0	0	1	0	0	0	0	0	0	0	0	0	0	0	0	0	0	0	0	0	0	0	0	0	0	0	0	0	0	0	0	0
AC024361.1	1	turquoise	0	0	0	0	0	0	0	0	0	0	0	0	0	0	0	0	0	0	0	0	0	0	0	0	0	0	0	0	0	0	0	0	0	0	0	0	1	0	0	0	0
AC024560.3	8	pink	0	0	0	0	0	0	0	0	0	0	0	0	0	0	0	0	0	0	0	0	0	0	0	0	1	0	0	0	0	0	0	0	0	0	0	0	0	0	0	0	0
AC024569.1	0	grey	0	0	0	0	0	0	0	0	0	0	0	0	0	1	0	0	0	0	0	0	0	0	0	0	0	0	0	0	0	0	0	0	0	0	0	0	0	0	0	0	0
AC024575.1	26	darkorange	0	0	0	0	0	0	0	0	1	0	0	0	0	0	0	0	0	0	0	0	0	0	0	0	0	0	0	0	0	0	0	0	0	0	0	0	0	0	0	0	0
AC024580.1	8	pink	0	0	0	0	0	0	0	0	0	0	0	0	0	0	0	0	0	0	0	0	0	0	0	0	1	0	0	0	0	0	0	0	0	0	0	0	0	0	0	0	0
AC024597.1	15	midnightblue	0	0	0	0	0	0	0	0	0	0	0	0	0	0	0	0	0	0	0	0	1	0	0	0	0	0	0	0	0	0	0	0	0	0	0	0	0	0	0	0	0
AC024597.2	12	tan	0	0	0	0	0	0	0	0	0	0	0	0	0	0	0	0	0	0	0	0	0	0	0	0	0	0	0	0	0	0	0	0	0	0	0	1	0	0	0	0	0
AC024704.2	25	orange	0	0	0	0	0	0	0	0	0	0	0	0	0	0	0	0	0	0	0	0	0	1	0	0	0	0	0	0	0	0	0	0	0	0	0	0	0	0	0	0	0
AC024902.1	7	black	1	0	0	0	0	0	0	0	0	0	0	0	0	0	0	0	0	0	0	0	0	0	0	0	0	0	0	0	0	0	0	0	0	0	0	0	0	0	0	0	0
AC024937.4	17	grey60	0	0	0	0	0	0	0	0	0	0	0	0	0	0	1	0	0	0	0	0	0	0	0	0	0	0	0	0	0	0	0	0	0	0	0	0	0	0	0	0	0
AC024937.6	29	saddlebrown	0	0	0	0	0	0	0	0	0	0	0	0	0	0	0	0	0	0	0	0	0	0	0	0	0	0	0	0	0	1	0	0	0	0	0	0	0	0	0	0	0
AC025165.8	2	blue	0	1	0	0	0	0	0	0	0	0	0	0	0	0	0	0	0	0	0	0	0	0	0	0	0	0	0	0	0	0	0	0	0	0	0	0	0	0	0	0	0
AC025171.1	20	royalblue	0	0	0	0	0	0	0	0	0	0	0	0	0	0	0	0	0	0	0	0	0	0	0	0	0	0	0	0	1	0	0	0	0	0	0	0	0	0	0	0	0
AC025260.1	1	turquoise	0	0	0	0	0	0	0	0	0	0	0	0	0	0	0	0	0	0	0	0	0	0	0	0	0	0	0	0	0	0	0	0	0	0	0	0	1	0	0	0	0
AC025263.3	11	greenyellow	0	0	0	0	0	0	0	0	0	0	0	0	1	0	0	0	0	0	0	0	0	0	0	0	0	0	0	0	0	0	0	0	0	0	0	0	0	0	0	0	0
AC025283.1	3	brown	0	0	1	0	0	0	0	0	0	0	0	0	0	0	0	0	0	0	0	0	0	0	0	0	0	0	0	0	0	0	0	0	0	0	0	0	0	0	0	0	0
AC025283.2	0	grey	0	0	0	0	0	0	0	0	0	0	0	0	0	1	0	0	0	0	0	0	0	0	0	0	0	0	0	0	0	0	0	0	0	0	0	0	0	0	0	0	0
AC025283.3	3	brown	0	0	1	0	0	0	0	0	0	0	0	0	0	0	0	0	0	0	0	0	0	0	0	0	0	0	0	0	0	0	0	0	0	0	0	0	0	0	0	0	0
AC025283.4	0	grey	0	0	0	0	0	0	0	0	0	0	0	0	0	1	0	0	0	0	0	0	0	0	0	0	0	0	0	0	0	0	0	0	0	0	0	0	0	0	0	0	0
AC025283.5	0	grey	0	0	0	0	0	0	0	0	0	0	0	0	0	1	0	0	0	0	0	0	0	0	0	0	0	0	0	0	0	0	0	0	0	0	0	0	0	0	0	0	0
AC025287.2	0	grey	0	0	0	0	0	0	0	0	0	0	0	0	0	1	0	0	0	0	0	0	0	0	0	0	0	0	0	0	0	0	0	0	0	0	0	0	0	0	0	0	0
AC025335.1	9	magenta	0	0	0	0	0	0	0	0	0	0	0	0	0	0	0	0	0	0	1	0	0	0	0	0	0	0	0	0	0	0	0	0	0	0	0	0	0	0	0	0	0
AC025442.1	27	white	0	0	0	0	0	0	0	0	0	0	0	0	0	0	0	0	0	0	0	0	0	0	0	0	0	0	0	0	0	0	0	0	0	0	0	0	0	0	1	0	0
AC025442.3	1	turquoise	0	0	0	0	0	0	0	0	0	0	0	0	0	0	0	0	0	0	0	0	0	0	0	0	0	0	0	0	0	0	0	0	0	0	0	0	1	0	0	0	0
AC025449.1	32	violet	0	0	0	0	0	0	0	0	0	0	0	0	0	0	0	0	0	0	0	0	0	0	0	0	0	0	0	0	0	0	0	0	0	0	0	0	0	1	0	0	0
AC025572.1	0	grey	0	0	0	0	0	0	0	0	0	0	0	0	0	1	0	0	0	0	0	0	0	0	0	0	0	0	0	0	0	0	0	0	0	0	0	0	0	0	0	0	0
AC025627.4	0	grey	0	0	0	0	0	0	0	0	0	0	0	0	0	1	0	0	0	0	0	0	0	0	0	0	0	0	0	0	0	0	0	0	0	0	0	0	0	0	0	0	0
AC025627.9	11	greenyellow	0	0	0	0	0	0	0	0	0	0	0	0	1	0	0	0	0	0	0	0	0	0	0	0	0	0	0	0	0	0	0	0	0	0	0	0	0	0	0	0	0
AC025750.5	10	purple	0	0	0	0	0	0	0	0	0	0	0	0	0	0	0	0	0	0	0	0	0	0	0	0	0	0	1	0	0	0	0	0	0	0	0	0	0	0	0	0	0
AC025918.1	0	grey	0	0	0	0	0	0	0	0	0	0	0	0	0	1	0	0	0	0	0	0	0	0	0	0	0	0	0	0	0	0	0	0	0	0	0	0	0	0	0	0	0
AC025918.2	17	grey60	0	0	0	0	0	0	0	0	0	0	0	0	0	0	1	0	0	0	0	0	0	0	0	0	0	0	0	0	0	0	0	0	0	0	0	0	0	0	0	0	0
AC026150.6	0	grey	0	0	0	0	0	0	0	0	0	0	0	0	0	1	0	0	0	0	0	0	0	0	0	0	0	0	0	0	0	0	0	0	0	0	0	0	0	0	0	0	0
AC026166.1	1	turquoise	0	0	0	0	0	0	0	0	0	0	0	0	0	0	0	0	0	0	0	0	0	0	0	0	0	0	0	0	0	0	0	0	0	0	0	0	1	0	0	0	0
AC026202.3	3	brown	0	0	1	0	0	0	0	0	0	0	0	0	0	0	0	0	0	0	0	0	0	0	0	0	0	0	0	0	0	0	0	0	0	0	0	0	0	0	0	0	0
AC026230.1	0	grey	0	0	0	0	0	0	0	0	0	0	0	0	0	1	0	0	0	0	0	0	0	0	0	0	0	0	0	0	0	0	0	0	0	0	0	0	0	0	0	0	0
AC026271.1	1	turquoise	0	0	0	0	0	0	0	0	0	0	0	0	0	0	0	0	0	0	0	0	0	0	0	0	0	0	0	0	0	0	0	0	0	0	0	0	1	0	0	0	0
AC026271.3	1	turquoise	0	0	0	0	0	0	0	0	0	0	0	0	0	0	0	0	0	0	0	0	0	0	0	0	0	0	0	0	0	0	0	0	0	0	0	0	1	0	0	0	0
AC026271.4	1	turquoise	0	0	0	0	0	0	0	0	0	0	0	0	0	0	0	0	0	0	0	0	0	0	0	0	0	0	0	0	0	0	0	0	0	0	0	0	1	0	0	0	0
AC026271.5	5	green	0	0	0	0	0	0	0	0	0	0	0	1	0	0	0	0	0	0	0	0	0	0	0	0	0	0	0	0	0	0	0	0	0	0	0	0	0	0	0	0	0
AC026271.6	1	turquoise	0	0	0	0	0	0	0	0	0	0	0	0	0	0	0	0	0	0	0	0	0	0	0	0	0	0	0	0	0	0	0	0	0	0	0	0	1	0	0	0	0
AC026271.7	0	grey	0	0	0	0	0	0	0	0	0	0	0	0	0	1	0	0	0	0	0	0	0	0	0	0	0	0	0	0	0	0	0	0	0	0	0	0	0	0	0	0	0
AC026366.1	18	lightgreen	0	0	0	0	0	0	0	0	0	0	0	0	0	0	0	0	1	0	0	0	0	0	0	0	0	0	0	0	0	0	0	0	0	0	0	0	0	0	0	0	0
AC026448.1	0	grey	0	0	0	0	0	0	0	0	0	0	0	0	0	1	0	0	0	0	0	0	0	0	0	0	0	0	0	0	0	0	0	0	0	0	0	0	0	0	0	0	0
AC026449.1	4	yellow	0	0	0	0	0	0	0	0	0	0	0	0	0	0	0	0	0	0	0	0	0	0	0	0	0	0	0	0	0	0	0	0	0	0	0	0	0	0	0	1	0
AC026462.1	5	green	0	0	0	0	0	0	0	0	0	0	0	1	0	0	0	0	0	0	0	0	0	0	0	0	0	0	0	0	0	0	0	0	0	0	0	0	0	0	0	0	0
AC026464.1	0	grey	0	0	0	0	0	0	0	0	0	0	0	0	0	1	0	0	0	0	0	0	0	0	0	0	0	0	0	0	0	0	0	0	0	0	0	0	0	0	0	0	0
AC026464.2	0	grey	0	0	0	0	0	0	0	0	0	0	0	0	0	1	0	0	0	0	0	0	0	0	0	0	0	0	0	0	0	0	0	0	0	0	0	0	0	0	0	0	0
AC026469.1	11	greenyellow	0	0	0	0	0	0	0	0	0	0	0	0	1	0	0	0	0	0	0	0	0	0	0	0	0	0	0	0	0	0	0	0	0	0	0	0	0	0	0	0	0
AC026639.1	0	grey	0	0	0	0	0	0	0	0	0	0	0	0	0	1	0	0	0	0	0	0	0	0	0	0	0	0	0	0	0	0	0	0	0	0	0	0	0	0	0	0	0
AC026703.1	22	darkgreen	0	0	0	0	1	0	0	0	0	0	0	0	0	0	0	0	0	0	0	0	0	0	0	0	0	0	0	0	0	0	0	0	0	0	0	0	0	0	0	0	0
AC026801.1	29	saddlebrown	0	0	0	0	0	0	0	0	0	0	0	0	0	0	0	0	0	0	0	0	0	0	0	0	0	0	0	0	0	1	0	0	0	0	0	0	0	0	0	0	0
AC026801.2	0	grey	0	0	0	0	0	0	0	0	0	0	0	0	0	1	0	0	0	0	0	0	0	0	0	0	0	0	0	0	0	0	0	0	0	0	0	0	0	0	0	0	0
AC026803.14	2	blue	0	1	0	0	0	0	0	0	0	0	0	0	0	0	0	0	0	0	0	0	0	0	0	0	0	0	0	0	0	0	0	0	0	0	0	0	0	0	0	0	0
AC026904.1	39	orangered4	0	0	0	0	0	0	0	0	0	0	0	0	0	0	0	0	0	0	0	0	0	0	1	0	0	0	0	0	0	0	0	0	0	0	0	0	0	0	0	0	0
AC026956.1	1	turquoise	0	0	0	0	0	0	0	0	0	0	0	0	0	0	0	0	0	0	0	0	0	0	0	0	0	0	0	0	0	0	0	0	0	0	0	0	1	0	0	0	0
AC026992.1	0	grey	0	0	0	0	0	0	0	0	0	0	0	0	0	1	0	0	0	0	0	0	0	0	0	0	0	0	0	0	0	0	0	0	0	0	0	0	0	0	0	0	0
AC027307.1	1	turquoise	0	0	0	0	0	0	0	0	0	0	0	0	0	0	0	0	0	0	0	0	0	0	0	0	0	0	0	0	0	0	0	0	0	0	0	0	1	0	0	0	0
AC027323.1	8	pink	0	0	0	0	0	0	0	0	0	0	0	0	0	0	0	0	0	0	0	0	0	0	0	0	1	0	0	0	0	0	0	0	0	0	0	0	0	0	0	0	0
AC027601.1	7	black	1	0	0	0	0	0	0	0	0	0	0	0	0	0	0	0	0	0	0	0	0	0	0	0	0	0	0	0	0	0	0	0	0	0	0	0	0	0	0	0	0
AC027612.1	1	turquoise	0	0	0	0	0	0	0	0	0	0	0	0	0	0	0	0	0	0	0	0	0	0	0	0	0	0	0	0	0	0	0	0	0	0	0	0	1	0	0	0	0
AC027612.6	6	red	0	0	0	0	0	0	0	0	0	0	0	0	0	0	0	0	0	0	0	0	0	0	0	0	0	0	0	1	0	0	0	0	0	0	0	0	0	0	0	0	0
AC027763.2	3	brown	0	0	1	0	0	0	0	0	0	0	0	0	0	0	0	0	0	0	0	0	0	0	0	0	0	0	0	0	0	0	0	0	0	0	0	0	0	0	0	0	0
AC027807.1	29	saddlebrown	0	0	0	0	0	0	0	0	0	0	0	0	0	0	0	0	0	0	0	0	0	0	0	0	0	0	0	0	0	1	0	0	0	0	0	0	0	0	0	0	0
AC032027.1	3	brown	0	0	1	0	0	0	0	0	0	0	0	0	0	0	0	0	0	0	0	0	0	0	0	0	0	0	0	0	0	0	0	0	0	0	0	0	0	0	0	0	0
AC034102.1	2	blue	0	1	0	0	0	0	0	0	0	0	0	0	0	0	0	0	0	0	0	0	0	0	0	0	0	0	0	0	0	0	0	0	0	0	0	0	0	0	0	0	0
AC034193.5	7	black	1	0	0	0	0	0	0	0	0	0	0	0	0	0	0	0	0	0	0	0	0	0	0	0	0	0	0	0	0	0	0	0	0	0	0	0	0	0	0	0	0
AC034198.7	3	brown	0	0	1	0	0	0	0	0	0	0	0	0	0	0	0	0	0	0	0	0	0	0	0	0	0	0	0	0	0	0	0	0	0	0	0	0	0	0	0	0	0
AC034207.1	2	blue	0	1	0	0	0	0	0	0	0	0	0	0	0	0	0	0	0	0	0	0	0	0	0	0	0	0	0	0	0	0	0	0	0	0	0	0	0	0	0	0	0
AC034220.3	15	midnightblue	0	0	0	0	0	0	0	0	0	0	0	0	0	0	0	0	0	0	0	0	1	0	0	0	0	0	0	0	0	0	0	0	0	0	0	0	0	0	0	0	0
AC034228.2	3	brown	0	0	1	0	0	0	0	0	0	0	0	0	0	0	0	0	0	0	0	0	0	0	0	0	0	0	0	0	0	0	0	0	0	0	0	0	0	0	0	0	0
AC034228.3	3	brown	0	0	1	0	0	0	0	0	0	0	0	0	0	0	0	0	0	0	0	0	0	0	0	0	0	0	0	0	0	0	0	0	0	0	0	0	0	0	0	0	0
AC034228.4	2	blue	0	1	0	0	0	0	0	0	0	0	0	0	0	0	0	0	0	0	0	0	0	0	0	0	0	0	0	0	0	0	0	0	0	0	0	0	0	0	0	0	0
AC034229.1	29	saddlebrown	0	0	0	0	0	0	0	0	0	0	0	0	0	0	0	0	0	0	0	0	0	0	0	0	0	0	0	0	0	1	0	0	0	0	0	0	0	0	0	0	0
AC034243.1	3	brown	0	0	1	0	0	0	0	0	0	0	0	0	0	0	0	0	0	0	0	0	0	0	0	0	0	0	0	0	0	0	0	0	0	0	0	0	0	0	0	0	0
AC035142.1	0	grey	0	0	0	0	0	0	0	0	0	0	0	0	0	1	0	0	0	0	0	0	0	0	0	0	0	0	0	0	0	0	0	0	0	0	0	0	0	0	0	0	0
AC035143.1	0	grey	0	0	0	0	0	0	0	0	0	0	0	0	0	1	0	0	0	0	0	0	0	0	0	0	0	0	0	0	0	0	0	0	0	0	0	0	0	0	0	0	0
AC037445.1	1	turquoise	0	0	0	0	0	0	0	0	0	0	0	0	0	0	0	0	0	0	0	0	0	0	0	0	0	0	0	0	0	0	0	0	0	0	0	0	1	0	0	0	0
AC037459.4	11	greenyellow	0	0	0	0	0	0	0	0	0	0	0	0	1	0	0	0	0	0	0	0	0	0	0	0	0	0	0	0	0	0	0	0	0	0	0	0	0	0	0	0	0
AC039057.1	0	grey	0	0	0	0	0	0	0	0	0	0	0	0	0	1	0	0	0	0	0	0	0	0	0	0	0	0	0	0	0	0	0	0	0	0	0	0	0	0	0	0	0
AC040160.1	1	turquoise	0	0	0	0	0	0	0	0	0	0	0	0	0	0	0	0	0	0	0	0	0	0	0	0	0	0	0	0	0	0	0	0	0	0	0	0	1	0	0	0	0
AC040162.1	7	black	1	0	0	0	0	0	0	0	0	0	0	0	0	0	0	0	0	0	0	0	0	0	0	0	0	0	0	0	0	0	0	0	0	0	0	0	0	0	0	0	0
AC040173.1	2	blue	0	1	0	0	0	0	0	0	0	0	0	0	0	0	0	0	0	0	0	0	0	0	0	0	0	0	0	0	0	0	0	0	0	0	0	0	0	0	0	0	0
AC040975.1	0	grey	0	0	0	0	0	0	0	0	0	0	0	0	0	1	0	0	0	0	0	0	0	0	0	0	0	0	0	0	0	0	0	0	0	0	0	0	0	0	0	0	0
AC041005.1	12	tan	0	0	0	0	0	0	0	0	0	0	0	0	0	0	0	0	0	0	0	0	0	0	0	0	0	0	0	0	0	0	0	0	0	0	0	1	0	0	0	0	0
AC044839.1	30	steelblue	0	0	0	0	0	0	0	0	0	0	0	0	0	0	0	0	0	0	0	0	0	0	0	0	0	0	0	0	0	0	0	0	0	0	1	0	0	0	0	0	0
AC046130.1	1	turquoise	0	0	0	0	0	0	0	0	0	0	0	0	0	0	0	0	0	0	0	0	0	0	0	0	0	0	0	0	0	0	0	0	0	0	0	0	1	0	0	0	0
AC046134.1	3	brown	0	0	1	0	0	0	0	0	0	0	0	0	0	0	0	0	0	0	0	0	0	0	0	0	0	0	0	0	0	0	0	0	0	0	0	0	0	0	0	0	0
AC046143.3	1	turquoise	0	0	0	0	0	0	0	0	0	0	0	0	0	0	0	0	0	0	0	0	0	0	0	0	0	0	0	0	0	0	0	0	0	0	0	0	1	0	0	0	0
AC046143.5	3	brown	0	0	1	0	0	0	0	0	0	0	0	0	0	0	0	0	0	0	0	0	0	0	0	0	0	0	0	0	0	0	0	0	0	0	0	0	0	0	0	0	0
AC046143.7	1	turquoise	0	0	0	0	0	0	0	0	0	0	0	0	0	0	0	0	0	0	0	0	0	0	0	0	0	0	0	0	0	0	0	0	0	0	0	0	1	0	0	0	0
AC051642.1	3	brown	0	0	1	0	0	0	0	0	0	0	0	0	0	0	0	0	0	0	0	0	0	0	0	0	0	0	0	0	0	0	0	0	0	0	0	0	0	0	0	0	0
AC051649.16	29	saddlebrown	0	0	0	0	0	0	0	0	0	0	0	0	0	0	0	0	0	0	0	0	0	0	0	0	0	0	0	0	0	1	0	0	0	0	0	0	0	0	0	0	0
AC053503.11	3	brown	0	0	1	0	0	0	0	0	0	0	0	0	0	0	0	0	0	0	0	0	0	0	0	0	0	0	0	0	0	0	0	0	0	0	0	0	0	0	0	0	0
AC053503.6	3	brown	0	0	1	0	0	0	0	0	0	0	0	0	0	0	0	0	0	0	0	0	0	0	0	0	0	0	0	0	0	0	0	0	0	0	0	0	0	0	0	0	0
AC053527.1	0	grey	0	0	0	0	0	0	0	0	0	0	0	0	0	1	0	0	0	0	0	0	0	0	0	0	0	0	0	0	0	0	0	0	0	0	0	0	0	0	0	0	0
AC055740.1	39	orangered4	0	0	0	0	0	0	0	0	0	0	0	0	0	0	0	0	0	0	0	0	0	0	1	0	0	0	0	0	0	0	0	0	0	0	0	0	0	0	0	0	0
AC055764.1	1	turquoise	0	0	0	0	0	0	0	0	0	0	0	0	0	0	0	0	0	0	0	0	0	0	0	0	0	0	0	0	0	0	0	0	0	0	0	0	1	0	0	0	0
AC055811.1	0	grey	0	0	0	0	0	0	0	0	0	0	0	0	0	1	0	0	0	0	0	0	0	0	0	0	0	0	0	0	0	0	0	0	0	0	0	0	0	0	0	0	0
AC055811.5	4	yellow	0	0	0	0	0	0	0	0	0	0	0	0	0	0	0	0	0	0	0	0	0	0	0	0	0	0	0	0	0	0	0	0	0	0	0	0	0	0	0	1	0
AC055876.3	0	grey	0	0	0	0	0	0	0	0	0	0	0	0	0	1	0	0	0	0	0	0	0	0	0	0	0	0	0	0	0	0	0	0	0	0	0	0	0	0	0	0	0
AC058791.1	15	midnightblue	0	0	0	0	0	0	0	0	0	0	0	0	0	0	0	0	0	0	0	0	1	0	0	0	0	0	0	0	0	0	0	0	0	0	0	0	0	0	0	0	0
AC058791.2	3	brown	0	0	1	0	0	0	0	0	0	0	0	0	0	0	0	0	0	0	0	0	0	0	0	0	0	0	0	0	0	0	0	0	0	0	0	0	0	0	0	0	0
AC058822.1	0	grey	0	0	0	0	0	0	0	0	0	0	0	0	0	1	0	0	0	0	0	0	0	0	0	0	0	0	0	0	0	0	0	0	0	0	0	0	0	0	0	0	0
AC060834.2	1	turquoise	0	0	0	0	0	0	0	0	0	0	0	0	0	0	0	0	0	0	0	0	0	0	0	0	0	0	0	0	0	0	0	0	0	0	0	0	1	0	0	0	0
AC061961.2	2	blue	0	1	0	0	0	0	0	0	0	0	0	0	0	0	0	0	0	0	0	0	0	0	0	0	0	0	0	0	0	0	0	0	0	0	0	0	0	0	0	0	0
AC061975.8	0	grey	0	0	0	0	0	0	0	0	0	0	0	0	0	1	0	0	0	0	0	0	0	0	0	0	0	0	0	0	0	0	0	0	0	0	0	0	0	0	0	0	0
AC061975.9	0	grey	0	0	0	0	0	0	0	0	0	0	0	0	0	1	0	0	0	0	0	0	0	0	0	0	0	0	0	0	0	0	0	0	0	0	0	0	0	0	0	0	0
AC062017.1	8	pink	0	0	0	0	0	0	0	0	0	0	0	0	0	0	0	0	0	0	0	0	0	0	0	0	1	0	0	0	0	0	0	0	0	0	0	0	0	0	0	0	0
AC062021.1	3	brown	0	0	1	0	0	0	0	0	0	0	0	0	0	0	0	0	0	0	0	0	0	0	0	0	0	0	0	0	0	0	0	0	0	0	0	0	0	0	0	0	0
AC062028.1	2	blue	0	1	0	0	0	0	0	0	0	0	0	0	0	0	0	0	0	0	0	0	0	0	0	0	0	0	0	0	0	0	0	0	0	0	0	0	0	0	0	0	0
AC062029.1	3	brown	0	0	1	0	0	0	0	0	0	0	0	0	0	0	0	0	0	0	0	0	0	0	0	0	0	0	0	0	0	0	0	0	0	0	0	0	0	0	0	0	0
AC062037.1	7	black	1	0	0	0	0	0	0	0	0	0	0	0	0	0	0	0	0	0	0	0	0	0	0	0	0	0	0	0	0	0	0	0	0	0	0	0	0	0	0	0	0
AC063927.1	3	brown	0	0	1	0	0	0	0	0	0	0	0	0	0	0	0	0	0	0	0	0	0	0	0	0	0	0	0	0	0	0	0	0	0	0	0	0	0	0	0	0	0
AC063927.3	0	grey	0	0	0	0	0	0	0	0	0	0	0	0	0	1	0	0	0	0	0	0	0	0	0	0	0	0	0	0	0	0	0	0	0	0	0	0	0	0	0	0	0
AC063950.1	29	saddlebrown	0	0	0	0	0	0	0	0	0	0	0	0	0	0	0	0	0	0	0	0	0	0	0	0	0	0	0	0	0	1	0	0	0	0	0	0	0	0	0	0	0
AC063976.4	1	turquoise	0	0	0	0	0	0	0	0	0	0	0	0	0	0	0	0	0	0	0	0	0	0	0	0	0	0	0	0	0	0	0	0	0	0	0	0	1	0	0	0	0
AC063976.6	1	turquoise	0	0	0	0	0	0	0	0	0	0	0	0	0	0	0	0	0	0	0	0	0	0	0	0	0	0	0	0	0	0	0	0	0	0	0	0	1	0	0	0	0
AC064834.3	2	blue	0	1	0	0	0	0	0	0	0	0	0	0	0	0	0	0	0	0	0	0	0	0	0	0	0	0	0	0	0	0	0	0	0	0	0	0	0	0	0	0	0
AC064836.1	30	steelblue	0	0	0	0	0	0	0	0	0	0	0	0	0	0	0	0	0	0	0	0	0	0	0	0	0	0	0	0	0	0	0	0	0	0	1	0	0	0	0	0	0
AC064836.2	0	grey	0	0	0	0	0	0	0	0	0	0	0	0	0	1	0	0	0	0	0	0	0	0	0	0	0	0	0	0	0	0	0	0	0	0	0	0	0	0	0	0	0
AC064836.3	4	yellow	0	0	0	0	0	0	0	0	0	0	0	0	0	0	0	0	0	0	0	0	0	0	0	0	0	0	0	0	0	0	0	0	0	0	0	0	0	0	0	1	0
AC064843.2	23	darkturquoise	0	0	0	0	0	0	0	0	0	0	1	0	0	0	0	0	0	0	0	0	0	0	0	0	0	0	0	0	0	0	0	0	0	0	0	0	0	0	0	0	0
AC064847.2	5	green	0	0	0	0	0	0	0	0	0	0	0	1	0	0	0	0	0	0	0	0	0	0	0	0	0	0	0	0	0	0	0	0	0	0	0	0	0	0	0	0	0
AC064850.4	4	yellow	0	0	0	0	0	0	0	0	0	0	0	0	0	0	0	0	0	0	0	0	0	0	0	0	0	0	0	0	0	0	0	0	0	0	0	0	0	0	0	1	0
AC064852.4	31	paleturquoise	0	0	0	0	0	0	0	0	0	0	0	0	0	0	0	0	0	0	0	0	0	0	0	1	0	0	0	0	0	0	0	0	0	0	0	0	0	0	0	0	0
AC064852.5	18	lightgreen	0	0	0	0	0	0	0	0	0	0	0	0	0	0	0	0	1	0	0	0	0	0	0	0	0	0	0	0	0	0	0	0	0	0	0	0	0	0	0	0	0
AC064853.2	9	magenta	0	0	0	0	0	0	0	0	0	0	0	0	0	0	0	0	0	0	1	0	0	0	0	0	0	0	0	0	0	0	0	0	0	0	0	0	0	0	0	0	0
AC064853.3	0	grey	0	0	0	0	0	0	0	0	0	0	0	0	0	1	0	0	0	0	0	0	0	0	0	0	0	0	0	0	0	0	0	0	0	0	0	0	0	0	0	0	0
AC064853.4	3	brown	0	0	1	0	0	0	0	0	0	0	0	0	0	0	0	0	0	0	0	0	0	0	0	0	0	0	0	0	0	0	0	0	0	0	0	0	0	0	0	0	0
AC064871.3	2	blue	0	1	0	0	0	0	0	0	0	0	0	0	0	0	0	0	0	0	0	0	0	0	0	0	0	0	0	0	0	0	0	0	0	0	0	0	0	0	0	0	0
AC064872.1	2	blue	0	1	0	0	0	0	0	0	0	0	0	0	0	0	0	0	0	0	0	0	0	0	0	0	0	0	0	0	0	0	0	0	0	0	0	0	0	0	0	0	0
AC064875.2	27	white	0	0	0	0	0	0	0	0	0	0	0	0	0	0	0	0	0	0	0	0	0	0	0	0	0	0	0	0	0	0	0	0	0	0	0	0	0	0	1	0	0
AC066593.1	23	darkturquoise	0	0	0	0	0	0	0	0	0	0	1	0	0	0	0	0	0	0	0	0	0	0	0	0	0	0	0	0	0	0	0	0	0	0	0	0	0	0	0	0	0
AC066692.1	17	grey60	0	0	0	0	0	0	0	0	0	0	0	0	0	0	1	0	0	0	0	0	0	0	0	0	0	0	0	0	0	0	0	0	0	0	0	0	0	0	0	0	0
AC066692.2	0	grey	0	0	0	0	0	0	0	0	0	0	0	0	0	1	0	0	0	0	0	0	0	0	0	0	0	0	0	0	0	0	0	0	0	0	0	0	0	0	0	0	0
AC066692.5	3	brown	0	0	1	0	0	0	0	0	0	0	0	0	0	0	0	0	0	0	0	0	0	0	0	0	0	0	0	0	0	0	0	0	0	0	0	0	0	0	0	0	0
AC067718.1	2	blue	0	1	0	0	0	0	0	0	0	0	0	0	0	0	0	0	0	0	0	0	0	0	0	0	0	0	0	0	0	0	0	0	0	0	0	0	0	0	0	0	0
AC067852.1	2	blue	0	1	0	0	0	0	0	0	0	0	0	0	0	0	0	0	0	0	0	0	0	0	0	0	0	0	0	0	0	0	0	0	0	0	0	0	0	0	0	0	0
AC067940.1	10	purple	0	0	0	0	0	0	0	0	0	0	0	0	0	0	0	0	0	0	0	0	0	0	0	0	0	0	1	0	0	0	0	0	0	0	0	0	0	0	0	0	0
AC067945.3	8	pink	0	0	0	0	0	0	0	0	0	0	0	0	0	0	0	0	0	0	0	0	0	0	0	0	1	0	0	0	0	0	0	0	0	0	0	0	0	0	0	0	0
AC067945.4	2	blue	0	1	0	0	0	0	0	0	0	0	0	0	0	0	0	0	0	0	0	0	0	0	0	0	0	0	0	0	0	0	0	0	0	0	0	0	0	0	0	0	0
AC067950.1	10	purple	0	0	0	0	0	0	0	0	0	0	0	0	0	0	0	0	0	0	0	0	0	0	0	0	0	0	1	0	0	0	0	0	0	0	0	0	0	0	0	0	0
AC067959.1	6	red	0	0	0	0	0	0	0	0	0	0	0	0	0	0	0	0	0	0	0	0	0	0	0	0	0	0	0	1	0	0	0	0	0	0	0	0	0	0	0	0	0
AC067961.1	1	turquoise	0	0	0	0	0	0	0	0	0	0	0	0	0	0	0	0	0	0	0	0	0	0	0	0	0	0	0	0	0	0	0	0	0	0	0	0	1	0	0	0	0
AC068020.1	2	blue	0	1	0	0	0	0	0	0	0	0	0	0	0	0	0	0	0	0	0	0	0	0	0	0	0	0	0	0	0	0	0	0	0	0	0	0	0	0	0	0	0
AC068020.2	0	grey	0	0	0	0	0	0	0	0	0	0	0	0	0	1	0	0	0	0	0	0	0	0	0	0	0	0	0	0	0	0	0	0	0	0	0	0	0	0	0	0	0
AC068057.1	36	yellowgreen	0	0	0	0	0	0	0	0	0	0	0	0	0	0	0	0	0	0	0	0	0	0	0	0	0	0	0	0	0	0	0	0	0	0	0	0	0	0	0	0	1
AC068057.2	13	salmon	0	0	0	0	0	0	0	0	0	0	0	0	0	0	0	0	0	0	0	0	0	0	0	0	0	0	0	0	0	0	1	0	0	0	0	0	0	0	0	0	0
AC068134.10	1	turquoise	0	0	0	0	0	0	0	0	0	0	0	0	0	0	0	0	0	0	0	0	0	0	0	0	0	0	0	0	0	0	0	0	0	0	0	0	1	0	0	0	0
AC068138.1	22	darkgreen	0	0	0	0	1	0	0	0	0	0	0	0	0	0	0	0	0	0	0	0	0	0	0	0	0	0	0	0	0	0	0	0	0	0	0	0	0	0	0	0	0
AC068152.2	10	purple	0	0	0	0	0	0	0	0	0	0	0	0	0	0	0	0	0	0	0	0	0	0	0	0	0	0	1	0	0	0	0	0	0	0	0	0	0	0	0	0	0
AC068196.1	37	skyblue3	0	0	0	0	0	0	0	0	0	0	0	0	0	0	0	0	0	0	0	0	0	0	0	0	0	0	0	0	0	0	0	0	0	1	0	0	0	0	0	0	0
AC068234.1	9	magenta	0	0	0	0	0	0	0	0	0	0	0	0	0	0	0	0	0	0	1	0	0	0	0	0	0	0	0	0	0	0	0	0	0	0	0	0	0	0	0	0	0
AC068279.2	15	midnightblue	0	0	0	0	0	0	0	0	0	0	0	0	0	0	0	0	0	0	0	0	1	0	0	0	0	0	0	0	0	0	0	0	0	0	0	0	0	0	0	0	0
AC068282.3	0	grey	0	0	0	0	0	0	0	0	0	0	0	0	0	1	0	0	0	0	0	0	0	0	0	0	0	0	0	0	0	0	0	0	0	0	0	0	0	0	0	0	0
AC068446.1	12	tan	0	0	0	0	0	0	0	0	0	0	0	0	0	0	0	0	0	0	0	0	0	0	0	0	0	0	0	0	0	0	0	0	0	0	0	1	0	0	0	0	0
AC068489.1	2	blue	0	1	0	0	0	0	0	0	0	0	0	0	0	0	0	0	0	0	0	0	0	0	0	0	0	0	0	0	0	0	0	0	0	0	0	0	0	0	0	0	0
AC068490.1	0	grey	0	0	0	0	0	0	0	0	0	0	0	0	0	1	0	0	0	0	0	0	0	0	0	0	0	0	0	0	0	0	0	0	0	0	0	0	0	0	0	0	0
AC068490.2	6	red	0	0	0	0	0	0	0	0	0	0	0	0	0	0	0	0	0	0	0	0	0	0	0	0	0	0	0	1	0	0	0	0	0	0	0	0	0	0	0	0	0
AC068491.1	2	blue	0	1	0	0	0	0	0	0	0	0	0	0	0	0	0	0	0	0	0	0	0	0	0	0	0	0	0	0	0	0	0	0	0	0	0	0	0	0	0	0	0
AC068491.3	19	lightyellow	0	0	0	0	0	0	0	0	0	0	0	0	0	0	0	0	0	1	0	0	0	0	0	0	0	0	0	0	0	0	0	0	0	0	0	0	0	0	0	0	0
AC068492.1	0	grey	0	0	0	0	0	0	0	0	0	0	0	0	0	1	0	0	0	0	0	0	0	0	0	0	0	0	0	0	0	0	0	0	0	0	0	0	0	0	0	0	0
AC068499.6	2	blue	0	1	0	0	0	0	0	0	0	0	0	0	0	0	0	0	0	0	0	0	0	0	0	0	0	0	0	0	0	0	0	0	0	0	0	0	0	0	0	0	0
AC068522.4	18	lightgreen	0	0	0	0	0	0	0	0	0	0	0	0	0	0	0	0	1	0	0	0	0	0	0	0	0	0	0	0	0	0	0	0	0	0	0	0	0	0	0	0	0
AC068533.7	14	cyan	0	0	0	1	0	0	0	0	0	0	0	0	0	0	0	0	0	0	0	0	0	0	0	0	0	0	0	0	0	0	0	0	0	0	0	0	0	0	0	0	0
AC068535.1	1	turquoise	0	0	0	0	0	0	0	0	0	0	0	0	0	0	0	0	0	0	0	0	0	0	0	0	0	0	0	0	0	0	0	0	0	0	0	0	1	0	0	0	0
AC068535.2	16	lightcyan	0	0	0	0	0	0	0	0	0	0	0	0	0	0	0	1	0	0	0	0	0	0	0	0	0	0	0	0	0	0	0	0	0	0	0	0	0	0	0	0	0
AC068535.3	3	brown	0	0	1	0	0	0	0	0	0	0	0	0	0	0	0	0	0	0	0	0	0	0	0	0	0	0	0	0	0	0	0	0	0	0	0	0	0	0	0	0	0
AC068538.2	2	blue	0	1	0	0	0	0	0	0	0	0	0	0	0	0	0	0	0	0	0	0	0	0	0	0	0	0	0	0	0	0	0	0	0	0	0	0	0	0	0	0	0
AC068580.5	7	black	1	0	0	0	0	0	0	0	0	0	0	0	0	0	0	0	0	0	0	0	0	0	0	0	0	0	0	0	0	0	0	0	0	0	0	0	0	0	0	0	0
AC068580.6	2	blue	0	1	0	0	0	0	0	0	0	0	0	0	0	0	0	0	0	0	0	0	0	0	0	0	0	0	0	0	0	0	0	0	0	0	0	0	0	0	0	0	0
AC068587.1	0	grey	0	0	0	0	0	0	0	0	0	0	0	0	0	1	0	0	0	0	0	0	0	0	0	0	0	0	0	0	0	0	0	0	0	0	0	0	0	0	0	0	0
AC068587.2	3	brown	0	0	1	0	0	0	0	0	0	0	0	0	0	0	0	0	0	0	0	0	0	0	0	0	0	0	0	0	0	0	0	0	0	0	0	0	0	0	0	0	0
AC068594.1	30	steelblue	0	0	0	0	0	0	0	0	0	0	0	0	0	0	0	0	0	0	0	0	0	0	0	0	0	0	0	0	0	0	0	0	0	0	1	0	0	0	0	0	0
AC068657.2	6	red	0	0	0	0	0	0	0	0	0	0	0	0	0	0	0	0	0	0	0	0	0	0	0	0	0	0	0	1	0	0	0	0	0	0	0	0	0	0	0	0	0
AC068669.1	0	grey	0	0	0	0	0	0	0	0	0	0	0	0	0	1	0	0	0	0	0	0	0	0	0	0	0	0	0	0	0	0	0	0	0	0	0	0	0	0	0	0	0
AC068669.2	8	pink	0	0	0	0	0	0	0	0	0	0	0	0	0	0	0	0	0	0	0	0	0	0	0	0	1	0	0	0	0	0	0	0	0	0	0	0	0	0	0	0	0
AC068765.1	6	red	0	0	0	0	0	0	0	0	0	0	0	0	0	0	0	0	0	0	0	0	0	0	0	0	0	0	0	1	0	0	0	0	0	0	0	0	0	0	0	0	0
AC068831.11	0	grey	0	0	0	0	0	0	0	0	0	0	0	0	0	1	0	0	0	0	0	0	0	0	0	0	0	0	0	0	0	0	0	0	0	0	0	0	0	0	0	0	0
AC068831.15	12	tan	0	0	0	0	0	0	0	0	0	0	0	0	0	0	0	0	0	0	0	0	0	0	0	0	0	0	0	0	0	0	0	0	0	0	0	1	0	0	0	0	0
AC068831.3	1	turquoise	0	0	0	0	0	0	0	0	0	0	0	0	0	0	0	0	0	0	0	0	0	0	0	0	0	0	0	0	0	0	0	0	0	0	0	0	1	0	0	0	0
AC068831.6	7	black	1	0	0	0	0	0	0	0	0	0	0	0	0	0	0	0	0	0	0	0	0	0	0	0	0	0	0	0	0	0	0	0	0	0	0	0	0	0	0	0	0
AC068831.8	4	yellow	0	0	0	0	0	0	0	0	0	0	0	0	0	0	0	0	0	0	0	0	0	0	0	0	0	0	0	0	0	0	0	0	0	0	0	0	0	0	0	1	0
AC068896.1	0	grey	0	0	0	0	0	0	0	0	0	0	0	0	0	1	0	0	0	0	0	0	0	0	0	0	0	0	0	0	0	0	0	0	0	0	0	0	0	0	0	0	0
AC068946.1	1	turquoise	0	0	0	0	0	0	0	0	0	0	0	0	0	0	0	0	0	0	0	0	0	0	0	0	0	0	0	0	0	0	0	0	0	0	0	0	1	0	0	0	0
AC069154.2	2	blue	0	1	0	0	0	0	0	0	0	0	0	0	0	0	0	0	0	0	0	0	0	0	0	0	0	0	0	0	0	0	0	0	0	0	0	0	0	0	0	0	0
AC069200.1	12	tan	0	0	0	0	0	0	0	0	0	0	0	0	0	0	0	0	0	0	0	0	0	0	0	0	0	0	0	0	0	0	0	0	0	0	0	1	0	0	0	0	0
AC069257.6	17	grey60	0	0	0	0	0	0	0	0	0	0	0	0	0	0	1	0	0	0	0	0	0	0	0	0	0	0	0	0	0	0	0	0	0	0	0	0	0	0	0	0	0
AC069257.9	15	midnightblue	0	0	0	0	0	0	0	0	0	0	0	0	0	0	0	0	0	0	0	0	1	0	0	0	0	0	0	0	0	0	0	0	0	0	0	0	0	0	0	0	0
AC069278.1	1	turquoise	0	0	0	0	0	0	0	0	0	0	0	0	0	0	0	0	0	0	0	0	0	0	0	0	0	0	0	0	0	0	0	0	0	0	0	0	1	0	0	0	0
AC069282.6	17	grey60	0	0	0	0	0	0	0	0	0	0	0	0	0	0	1	0	0	0	0	0	0	0	0	0	0	0	0	0	0	0	0	0	0	0	0	0	0	0	0	0	0
AC069287.1	2	blue	0	1	0	0	0	0	0	0	0	0	0	0	0	0	0	0	0	0	0	0	0	0	0	0	0	0	0	0	0	0	0	0	0	0	0	0	0	0	0	0	0
AC069292.6	18	lightgreen	0	0	0	0	0	0	0	0	0	0	0	0	0	0	0	0	1	0	0	0	0	0	0	0	0	0	0	0	0	0	0	0	0	0	0	0	0	0	0	0	0
AC069294.1	0	grey	0	0	0	0	0	0	0	0	0	0	0	0	0	1	0	0	0	0	0	0	0	0	0	0	0	0	0	0	0	0	0	0	0	0	0	0	0	0	0	0	0
AC069303.1	6	red	0	0	0	0	0	0	0	0	0	0	0	0	0	0	0	0	0	0	0	0	0	0	0	0	0	0	0	1	0	0	0	0	0	0	0	0	0	0	0	0	0
AC069363.1	0	grey	0	0	0	0	0	0	0	0	0	0	0	0	0	1	0	0	0	0	0	0	0	0	0	0	0	0	0	0	0	0	0	0	0	0	0	0	0	0	0	0	0
AC069368.3	3	brown	0	0	1	0	0	0	0	0	0	0	0	0	0	0	0	0	0	0	0	0	0	0	0	0	0	0	0	0	0	0	0	0	0	0	0	0	0	0	0	0	0
AC069513.3	7	black	1	0	0	0	0	0	0	0	0	0	0	0	0	0	0	0	0	0	0	0	0	0	0	0	0	0	0	0	0	0	0	0	0	0	0	0	0	0	0	0	0
AC069513.4	7	black	1	0	0	0	0	0	0	0	0	0	0	0	0	0	0	0	0	0	0	0	0	0	0	0	0	0	0	0	0	0	0	0	0	0	0	0	0	0	0	0	0
AC072052.7	23	darkturquoise	0	0	0	0	0	0	0	0	0	0	1	0	0	0	0	0	0	0	0	0	0	0	0	0	0	0	0	0	0	0	0	0	0	0	0	0	0	0	0	0	0
AC073043.2	2	blue	0	1	0	0	0	0	0	0	0	0	0	0	0	0	0	0	0	0	0	0	0	0	0	0	0	0	0	0	0	0	0	0	0	0	0	0	0	0	0	0	0
AC073046.25	1	turquoise	0	0	0	0	0	0	0	0	0	0	0	0	0	0	0	0	0	0	0	0	0	0	0	0	0	0	0	0	0	0	0	0	0	0	0	0	1	0	0	0	0
AC073046.4	10	purple	0	0	0	0	0	0	0	0	0	0	0	0	0	0	0	0	0	0	0	0	0	0	0	0	0	0	1	0	0	0	0	0	0	0	0	0	0	0	0	0	0
AC073063.1	5	green	0	0	0	0	0	0	0	0	0	0	0	1	0	0	0	0	0	0	0	0	0	0	0	0	0	0	0	0	0	0	0	0	0	0	0	0	0	0	0	0	0
AC073063.10	5	green	0	0	0	0	0	0	0	0	0	0	0	1	0	0	0	0	0	0	0	0	0	0	0	0	0	0	0	0	0	0	0	0	0	0	0	0	0	0	0	0	0
AC073069.2	5	green	0	0	0	0	0	0	0	0	0	0	0	1	0	0	0	0	0	0	0	0	0	0	0	0	0	0	0	0	0	0	0	0	0	0	0	0	0	0	0	0	0
AC073072.7	0	grey	0	0	0	0	0	0	0	0	0	0	0	0	0	1	0	0	0	0	0	0	0	0	0	0	0	0	0	0	0	0	0	0	0	0	0	0	0	0	0	0	0
AC073109.2	1	turquoise	0	0	0	0	0	0	0	0	0	0	0	0	0	0	0	0	0	0	0	0	0	0	0	0	0	0	0	0	0	0	0	0	0	0	0	0	1	0	0	0	0
AC073115.7	1	turquoise	0	0	0	0	0	0	0	0	0	0	0	0	0	0	0	0	0	0	0	0	0	0	0	0	0	0	0	0	0	0	0	0	0	0	0	0	1	0	0	0	0
AC073143.1	33	darkolivegreen	0	0	0	0	0	0	0	1	0	0	0	0	0	0	0	0	0	0	0	0	0	0	0	0	0	0	0	0	0	0	0	0	0	0	0	0	0	0	0	0	0
AC073150.4	8	pink	0	0	0	0	0	0	0	0	0	0	0	0	0	0	0	0	0	0	0	0	0	0	0	0	1	0	0	0	0	0	0	0	0	0	0	0	0	0	0	0	0
AC073150.6	0	grey	0	0	0	0	0	0	0	0	0	0	0	0	0	1	0	0	0	0	0	0	0	0	0	0	0	0	0	0	0	0	0	0	0	0	0	0	0	0	0	0	0
AC073210.1	7	black	1	0	0	0	0	0	0	0	0	0	0	0	0	0	0	0	0	0	0	0	0	0	0	0	0	0	0	0	0	0	0	0	0	0	0	0	0	0	0	0	0
AC073215.1	0	grey	0	0	0	0	0	0	0	0	0	0	0	0	0	1	0	0	0	0	0	0	0	0	0	0	0	0	0	0	0	0	0	0	0	0	0	0	0	0	0	0	0
AC073254.1	8	pink	0	0	0	0	0	0	0	0	0	0	0	0	0	0	0	0	0	0	0	0	0	0	0	0	1	0	0	0	0	0	0	0	0	0	0	0	0	0	0	0	0
AC073263.1	8	pink	0	0	0	0	0	0	0	0	0	0	0	0	0	0	0	0	0	0	0	0	0	0	0	0	1	0	0	0	0	0	0	0	0	0	0	0	0	0	0	0	0
AC073271.1	6	red	0	0	0	0	0	0	0	0	0	0	0	0	0	0	0	0	0	0	0	0	0	0	0	0	0	0	0	1	0	0	0	0	0	0	0	0	0	0	0	0	0
AC073283.4	1	turquoise	0	0	0	0	0	0	0	0	0	0	0	0	0	0	0	0	0	0	0	0	0	0	0	0	0	0	0	0	0	0	0	0	0	0	0	0	1	0	0	0	0
AC073308.1	12	tan	0	0	0	0	0	0	0	0	0	0	0	0	0	0	0	0	0	0	0	0	0	0	0	0	0	0	0	0	0	0	0	0	0	0	0	1	0	0	0	0	0
AC073321.4	24	darkgrey	0	0	0	0	0	1	0	0	0	0	0	0	0	0	0	0	0	0	0	0	0	0	0	0	0	0	0	0	0	0	0	0	0	0	0	0	0	0	0	0	0
AC073321.5	10	purple	0	0	0	0	0	0	0	0	0	0	0	0	0	0	0	0	0	0	0	0	0	0	0	0	0	0	1	0	0	0	0	0	0	0	0	0	0	0	0	0	0
AC073325.1	25	orange	0	0	0	0	0	0	0	0	0	0	0	0	0	0	0	0	0	0	0	0	0	1	0	0	0	0	0	0	0	0	0	0	0	0	0	0	0	0	0	0	0
AC073325.2	0	grey	0	0	0	0	0	0	0	0	0	0	0	0	0	1	0	0	0	0	0	0	0	0	0	0	0	0	0	0	0	0	0	0	0	0	0	0	0	0	0	0	0
AC073331.2	18	lightgreen	0	0	0	0	0	0	0	0	0	0	0	0	0	0	0	0	1	0	0	0	0	0	0	0	0	0	0	0	0	0	0	0	0	0	0	0	0	0	0	0	0
AC073333.8	3	brown	0	0	1	0	0	0	0	0	0	0	0	0	0	0	0	0	0	0	0	0	0	0	0	0	0	0	0	0	0	0	0	0	0	0	0	0	0	0	0	0	0
AC073342.1	17	grey60	0	0	0	0	0	0	0	0	0	0	0	0	0	0	1	0	0	0	0	0	0	0	0	0	0	0	0	0	0	0	0	0	0	0	0	0	0	0	0	0	0
AC073342.12	12	tan	0	0	0	0	0	0	0	0	0	0	0	0	0	0	0	0	0	0	0	0	0	0	0	0	0	0	0	0	0	0	0	0	0	0	0	1	0	0	0	0	0
AC073342.2	7	black	1	0	0	0	0	0	0	0	0	0	0	0	0	0	0	0	0	0	0	0	0	0	0	0	0	0	0	0	0	0	0	0	0	0	0	0	0	0	0	0	0
AC073343.1	15	midnightblue	0	0	0	0	0	0	0	0	0	0	0	0	0	0	0	0	0	0	0	0	1	0	0	0	0	0	0	0	0	0	0	0	0	0	0	0	0	0	0	0	0
AC073343.13	7	black	1	0	0	0	0	0	0	0	0	0	0	0	0	0	0	0	0	0	0	0	0	0	0	0	0	0	0	0	0	0	0	0	0	0	0	0	0	0	0	0	0
AC073343.8	9	magenta	0	0	0	0	0	0	0	0	0	0	0	0	0	0	0	0	0	0	1	0	0	0	0	0	0	0	0	0	0	0	0	0	0	0	0	0	0	0	0	0	0
AC073343.9	9	magenta	0	0	0	0	0	0	0	0	0	0	0	0	0	0	0	0	0	0	1	0	0	0	0	0	0	0	0	0	0	0	0	0	0	0	0	0	0	0	0	0	0
AC073346.2	6	red	0	0	0	0	0	0	0	0	0	0	0	0	0	0	0	0	0	0	0	0	0	0	0	0	0	0	0	1	0	0	0	0	0	0	0	0	0	0	0	0	0
AC073352.1	30	steelblue	0	0	0	0	0	0	0	0	0	0	0	0	0	0	0	0	0	0	0	0	0	0	0	0	0	0	0	0	0	0	0	0	0	0	1	0	0	0	0	0	0
AC073366.1	39	orangered4	0	0	0	0	0	0	0	0	0	0	0	0	0	0	0	0	0	0	0	0	0	0	1	0	0	0	0	0	0	0	0	0	0	0	0	0	0	0	0	0	0
AC073410.1	7	black	1	0	0	0	0	0	0	0	0	0	0	0	0	0	0	0	0	0	0	0	0	0	0	0	0	0	0	0	0	0	0	0	0	0	0	0	0	0	0	0	0
AC073415.2	1	turquoise	0	0	0	0	0	0	0	0	0	0	0	0	0	0	0	0	0	0	0	0	0	0	0	0	0	0	0	0	0	0	0	0	0	0	0	0	1	0	0	0	0
AC073421.1	20	royalblue	0	0	0	0	0	0	0	0	0	0	0	0	0	0	0	0	0	0	0	0	0	0	0	0	0	0	0	0	1	0	0	0	0	0	0	0	0	0	0	0	0
AC073422.1	8	pink	0	0	0	0	0	0	0	0	0	0	0	0	0	0	0	0	0	0	0	0	0	0	0	0	1	0	0	0	0	0	0	0	0	0	0	0	0	0	0	0	0
AC073464.7	25	orange	0	0	0	0	0	0	0	0	0	0	0	0	0	0	0	0	0	0	0	0	0	1	0	0	0	0	0	0	0	0	0	0	0	0	0	0	0	0	0	0	0
AC073465.1	3	brown	0	0	1	0	0	0	0	0	0	0	0	0	0	0	0	0	0	0	0	0	0	0	0	0	0	0	0	0	0	0	0	0	0	0	0	0	0	0	0	0	0
AC073479.1	23	darkturquoise	0	0	0	0	0	0	0	0	0	0	1	0	0	0	0	0	0	0	0	0	0	0	0	0	0	0	0	0	0	0	0	0	0	0	0	0	0	0	0	0	0
AC073548.1	2	blue	0	1	0	0	0	0	0	0	0	0	0	0	0	0	0	0	0	0	0	0	0	0	0	0	0	0	0	0	0	0	0	0	0	0	0	0	0	0	0	0	0
AC073610.1	2	blue	0	1	0	0	0	0	0	0	0	0	0	0	0	0	0	0	0	0	0	0	0	0	0	0	0	0	0	0	0	0	0	0	0	0	0	0	0	0	0	0	0
AC073610.5	2	blue	0	1	0	0	0	0	0	0	0	0	0	0	0	0	0	0	0	0	0	0	0	0	0	0	0	0	0	0	0	0	0	0	0	0	0	0	0	0	0	0	0
AC073621.1	10	purple	0	0	0	0	0	0	0	0	0	0	0	0	0	0	0	0	0	0	0	0	0	0	0	0	0	0	1	0	0	0	0	0	0	0	0	0	0	0	0	0	0
AC073621.2	2	blue	0	1	0	0	0	0	0	0	0	0	0	0	0	0	0	0	0	0	0	0	0	0	0	0	0	0	0	0	0	0	0	0	0	0	0	0	0	0	0	0	0
AC073621.3	4	yellow	0	0	0	0	0	0	0	0	0	0	0	0	0	0	0	0	0	0	0	0	0	0	0	0	0	0	0	0	0	0	0	0	0	0	0	0	0	0	0	1	0
AC073626.2	33	darkolivegreen	0	0	0	0	0	0	0	1	0	0	0	0	0	0	0	0	0	0	0	0	0	0	0	0	0	0	0	0	0	0	0	0	0	0	0	0	0	0	0	0	0
AC073629.2	0	grey	0	0	0	0	0	0	0	0	0	0	0	0	0	1	0	0	0	0	0	0	0	0	0	0	0	0	0	0	0	0	0	0	0	0	0	0	0	0	0	0	0
AC073635.5	7	black	1	0	0	0	0	0	0	0	0	0	0	0	0	0	0	0	0	0	0	0	0	0	0	0	0	0	0	0	0	0	0	0	0	0	0	0	0	0	0	0	0
AC073641.2	10	purple	0	0	0	0	0	0	0	0	0	0	0	0	0	0	0	0	0	0	0	0	0	0	0	0	0	0	1	0	0	0	0	0	0	0	0	0	0	0	0	0	0
AC073834.3	1	turquoise	0	0	0	0	0	0	0	0	0	0	0	0	0	0	0	0	0	0	0	0	0	0	0	0	0	0	0	0	0	0	0	0	0	0	0	0	1	0	0	0	0
AC073842.18	15	midnightblue	0	0	0	0	0	0	0	0	0	0	0	0	0	0	0	0	0	0	0	0	1	0	0	0	0	0	0	0	0	0	0	0	0	0	0	0	0	0	0	0	0
AC073842.19	15	midnightblue	0	0	0	0	0	0	0	0	0	0	0	0	0	0	0	0	0	0	0	0	1	0	0	0	0	0	0	0	0	0	0	0	0	0	0	0	0	0	0	0	0
AC073869.1	8	pink	0	0	0	0	0	0	0	0	0	0	0	0	0	0	0	0	0	0	0	0	0	0	0	0	1	0	0	0	0	0	0	0	0	0	0	0	0	0	0	0	0
AC073869.20	3	brown	0	0	1	0	0	0	0	0	0	0	0	0	0	0	0	0	0	0	0	0	0	0	0	0	0	0	0	0	0	0	0	0	0	0	0	0	0	0	0	0	0
AC073871.2	1	turquoise	0	0	0	0	0	0	0	0	0	0	0	0	0	0	0	0	0	0	0	0	0	0	0	0	0	0	0	0	0	0	0	0	0	0	0	0	1	0	0	0	0
AC073958.2	0	grey	0	0	0	0	0	0	0	0	0	0	0	0	0	1	0	0	0	0	0	0	0	0	0	0	0	0	0	0	0	0	0	0	0	0	0	0	0	0	0	0	0
AC073995.2	17	grey60	0	0	0	0	0	0	0	0	0	0	0	0	0	0	1	0	0	0	0	0	0	0	0	0	0	0	0	0	0	0	0	0	0	0	0	0	0	0	0	0	0
AC074019.2	1	turquoise	0	0	0	0	0	0	0	0	0	0	0	0	0	0	0	0	0	0	0	0	0	0	0	0	0	0	0	0	0	0	0	0	0	0	0	0	1	0	0	0	0
AC074051.1	0	grey	0	0	0	0	0	0	0	0	0	0	0	0	0	1	0	0	0	0	0	0	0	0	0	0	0	0	0	0	0	0	0	0	0	0	0	0	0	0	0	0	0
AC074091.1	0	grey	0	0	0	0	0	0	0	0	0	0	0	0	0	1	0	0	0	0	0	0	0	0	0	0	0	0	0	0	0	0	0	0	0	0	0	0	0	0	0	0	0
AC074099.1	11	greenyellow	0	0	0	0	0	0	0	0	0	0	0	0	1	0	0	0	0	0	0	0	0	0	0	0	0	0	0	0	0	0	0	0	0	0	0	0	0	0	0	0	0
AC074117.10	17	grey60	0	0	0	0	0	0	0	0	0	0	0	0	0	0	1	0	0	0	0	0	0	0	0	0	0	0	0	0	0	0	0	0	0	0	0	0	0	0	0	0	0
AC074117.13	10	purple	0	0	0	0	0	0	0	0	0	0	0	0	0	0	0	0	0	0	0	0	0	0	0	0	0	0	1	0	0	0	0	0	0	0	0	0	0	0	0	0	0
AC074138.3	19	lightyellow	0	0	0	0	0	0	0	0	0	0	0	0	0	0	0	0	0	1	0	0	0	0	0	0	0	0	0	0	0	0	0	0	0	0	0	0	0	0	0	0	0
AC074182.1	6	red	0	0	0	0	0	0	0	0	0	0	0	0	0	0	0	0	0	0	0	0	0	0	0	0	0	0	0	1	0	0	0	0	0	0	0	0	0	0	0	0	0
AC074183.4	9	magenta	0	0	0	0	0	0	0	0	0	0	0	0	0	0	0	0	0	0	1	0	0	0	0	0	0	0	0	0	0	0	0	0	0	0	0	0	0	0	0	0	0
AC074212.5	16	lightcyan	0	0	0	0	0	0	0	0	0	0	0	0	0	0	0	1	0	0	0	0	0	0	0	0	0	0	0	0	0	0	0	0	0	0	0	0	0	0	0	0	0
AC074289.1	12	tan	0	0	0	0	0	0	0	0	0	0	0	0	0	0	0	0	0	0	0	0	0	0	0	0	0	0	0	0	0	0	0	0	0	0	0	1	0	0	0	0	0
AC074290.1	6	red	0	0	0	0	0	0	0	0	0	0	0	0	0	0	0	0	0	0	0	0	0	0	0	0	0	0	0	1	0	0	0	0	0	0	0	0	0	0	0	0	0
AC074322.2	0	grey	0	0	0	0	0	0	0	0	0	0	0	0	0	1	0	0	0	0	0	0	0	0	0	0	0	0	0	0	0	0	0	0	0	0	0	0	0	0	0	0	0
AC074363.1	3	brown	0	0	1	0	0	0	0	0	0	0	0	0	0	0	0	0	0	0	0	0	0	0	0	0	0	0	0	0	0	0	0	0	0	0	0	0	0	0	0	0	0
AC078778.1	7	black	1	0	0	0	0	0	0	0	0	0	0	0	0	0	0	0	0	0	0	0	0	0	0	0	0	0	0	0	0	0	0	0	0	0	0	0	0	0	0	0	0
AC078784.1	3	brown	0	0	1	0	0	0	0	0	0	0	0	0	0	0	0	0	0	0	0	0	0	0	0	0	0	0	0	0	0	0	0	0	0	0	0	0	0	0	0	0	0
AC078794.1	7	black	1	0	0	0	0	0	0	0	0	0	0	0	0	0	0	0	0	0	0	0	0	0	0	0	0	0	0	0	0	0	0	0	0	0	0	0	0	0	0	0	0
AC078799.1	7	black	1	0	0	0	0	0	0	0	0	0	0	0	0	0	0	0	0	0	0	0	0	0	0	0	0	0	0	0	0	0	0	0	0	0	0	0	0	0	0	0	0
AC078802.1	38	plum1	0	0	0	0	0	0	0	0	0	0	0	0	0	0	0	0	0	0	0	0	0	0	0	0	0	1	0	0	0	0	0	0	0	0	0	0	0	0	0	0	0
AC078819.1	2	blue	0	1	0	0	0	0	0	0	0	0	0	0	0	0	0	0	0	0	0	0	0	0	0	0	0	0	0	0	0	0	0	0	0	0	0	0	0	0	0	0	0
AC078842.3	11	greenyellow	0	0	0	0	0	0	0	0	0	0	0	0	1	0	0	0	0	0	0	0	0	0	0	0	0	0	0	0	0	0	0	0	0	0	0	0	0	0	0	0	0
AC078882.1	2	blue	0	1	0	0	0	0	0	0	0	0	0	0	0	0	0	0	0	0	0	0	0	0	0	0	0	0	0	0	0	0	0	0	0	0	0	0	0	0	0	0	0
AC078883.3	16	lightcyan	0	0	0	0	0	0	0	0	0	0	0	0	0	0	0	1	0	0	0	0	0	0	0	0	0	0	0	0	0	0	0	0	0	0	0	0	0	0	0	0	0
AC078883.4	13	salmon	0	0	0	0	0	0	0	0	0	0	0	0	0	0	0	0	0	0	0	0	0	0	0	0	0	0	0	0	0	0	1	0	0	0	0	0	0	0	0	0	0
AC078899.1	8	pink	0	0	0	0	0	0	0	0	0	0	0	0	0	0	0	0	0	0	0	0	0	0	0	0	1	0	0	0	0	0	0	0	0	0	0	0	0	0	0	0	0
AC078917.1	3	brown	0	0	1	0	0	0	0	0	0	0	0	0	0	0	0	0	0	0	0	0	0	0	0	0	0	0	0	0	0	0	0	0	0	0	0	0	0	0	0	0	0
AC078937.3	3	brown	0	0	1	0	0	0	0	0	0	0	0	0	0	0	0	0	0	0	0	0	0	0	0	0	0	0	0	0	0	0	0	0	0	0	0	0	0	0	0	0	0
AC078937.4	2	blue	0	1	0	0	0	0	0	0	0	0	0	0	0	0	0	0	0	0	0	0	0	0	0	0	0	0	0	0	0	0	0	0	0	0	0	0	0	0	0	0	0
AC078994.1	2	blue	0	1	0	0	0	0	0	0	0	0	0	0	0	0	0	0	0	0	0	0	0	0	0	0	0	0	0	0	0	0	0	0	0	0	0	0	0	0	0	0	0
AC079005.1	0	grey	0	0	0	0	0	0	0	0	0	0	0	0	0	1	0	0	0	0	0	0	0	0	0	0	0	0	0	0	0	0	0	0	0	0	0	0	0	0	0	0	0
AC079089.2	1	turquoise	0	0	0	0	0	0	0	0	0	0	0	0	0	0	0	0	0	0	0	0	0	0	0	0	0	0	0	0	0	0	0	0	0	0	0	0	1	0	0	0	0
AC079111.1	7	black	1	0	0	0	0	0	0	0	0	0	0	0	0	0	0	0	0	0	0	0	0	0	0	0	0	0	0	0	0	0	0	0	0	0	0	0	0	0	0	0	0
AC079135.1	33	darkolivegreen	0	0	0	0	0	0	0	1	0	0	0	0	0	0	0	0	0	0	0	0	0	0	0	0	0	0	0	0	0	0	0	0	0	0	0	0	0	0	0	0	0
AC079140.1	0	grey	0	0	0	0	0	0	0	0	0	0	0	0	0	1	0	0	0	0	0	0	0	0	0	0	0	0	0	0	0	0	0	0	0	0	0	0	0	0	0	0	0
AC079145.4	13	salmon	0	0	0	0	0	0	0	0	0	0	0	0	0	0	0	0	0	0	0	0	0	0	0	0	0	0	0	0	0	0	1	0	0	0	0	0	0	0	0	0	0
AC079150.2	0	grey	0	0	0	0	0	0	0	0	0	0	0	0	0	1	0	0	0	0	0	0	0	0	0	0	0	0	0	0	0	0	0	0	0	0	0	0	0	0	0	0	0
AC079154.1	28	skyblue	0	0	0	0	0	0	0	0	0	0	0	0	0	0	0	0	0	0	0	0	0	0	0	0	0	0	0	0	0	0	0	0	1	0	0	0	0	0	0	0	0
AC079250.1	18	lightgreen	0	0	0	0	0	0	0	0	0	0	0	0	0	0	0	0	1	0	0	0	0	0	0	0	0	0	0	0	0	0	0	0	0	0	0	0	0	0	0	0	0
AC079305.10	16	lightcyan	0	0	0	0	0	0	0	0	0	0	0	0	0	0	0	1	0	0	0	0	0	0	0	0	0	0	0	0	0	0	0	0	0	0	0	0	0	0	0	0	0
AC079305.5	14	cyan	0	0	0	1	0	0	0	0	0	0	0	0	0	0	0	0	0	0	0	0	0	0	0	0	0	0	0	0	0	0	0	0	0	0	0	0	0	0	0	0	0
AC079305.8	0	grey	0	0	0	0	0	0	0	0	0	0	0	0	0	1	0	0	0	0	0	0	0	0	0	0	0	0	0	0	0	0	0	0	0	0	0	0	0	0	0	0	0
AC079305.9	16	lightcyan	0	0	0	0	0	0	0	0	0	0	0	0	0	0	0	1	0	0	0	0	0	0	0	0	0	0	0	0	0	0	0	0	0	0	0	0	0	0	0	0	0
AC079340.1	2	blue	0	1	0	0	0	0	0	0	0	0	0	0	0	0	0	0	0	0	0	0	0	0	0	0	0	0	0	0	0	0	0	0	0	0	0	0	0	0	0	0	0
AC079341.1	2	blue	0	1	0	0	0	0	0	0	0	0	0	0	0	0	0	0	0	0	0	0	0	0	0	0	0	0	0	0	0	0	0	0	0	0	0	0	0	0	0	0	0
AC079354.1	20	royalblue	0	0	0	0	0	0	0	0	0	0	0	0	0	0	0	0	0	0	0	0	0	0	0	0	0	0	0	0	1	0	0	0	0	0	0	0	0	0	0	0	0
AC079354.2	5	green	0	0	0	0	0	0	0	0	0	0	0	1	0	0	0	0	0	0	0	0	0	0	0	0	0	0	0	0	0	0	0	0	0	0	0	0	0	0	0	0	0
AC079354.4	3	brown	0	0	1	0	0	0	0	0	0	0	0	0	0	0	0	0	0	0	0	0	0	0	0	0	0	0	0	0	0	0	0	0	0	0	0	0	0	0	0	0	0
AC079354.5	5	green	0	0	0	0	0	0	0	0	0	0	0	1	0	0	0	0	0	0	0	0	0	0	0	0	0	0	0	0	0	0	0	0	0	0	0	0	0	0	0	0	0
AC079354.6	0	grey	0	0	0	0	0	0	0	0	0	0	0	0	0	1	0	0	0	0	0	0	0	0	0	0	0	0	0	0	0	0	0	0	0	0	0	0	0	0	0	0	0
AC079405.1	32	violet	0	0	0	0	0	0	0	0	0	0	0	0	0	0	0	0	0	0	0	0	0	0	0	0	0	0	0	0	0	0	0	0	0	0	0	0	0	1	0	0	0
AC079460.1	30	steelblue	0	0	0	0	0	0	0	0	0	0	0	0	0	0	0	0	0	0	0	0	0	0	0	0	0	0	0	0	0	0	0	0	0	0	1	0	0	0	0	0	0
AC079630.4	2	blue	0	1	0	0	0	0	0	0	0	0	0	0	0	0	0	0	0	0	0	0	0	0	0	0	0	0	0	0	0	0	0	0	0	0	0	0	0	0	0	0	0
AC079741.2	0	grey	0	0	0	0	0	0	0	0	0	0	0	0	0	1	0	0	0	0	0	0	0	0	0	0	0	0	0	0	0	0	0	0	0	0	0	0	0	0	0	0	0
AC079742.4	14	cyan	0	0	0	1	0	0	0	0	0	0	0	0	0	0	0	0	0	0	0	0	0	0	0	0	0	0	0	0	0	0	0	0	0	0	0	0	0	0	0	0	0
AC079753.4	1	turquoise	0	0	0	0	0	0	0	0	0	0	0	0	0	0	0	0	0	0	0	0	0	0	0	0	0	0	0	0	0	0	0	0	0	0	0	0	1	0	0	0	0
AC079753.5	5	green	0	0	0	0	0	0	0	0	0	0	0	1	0	0	0	0	0	0	0	0	0	0	0	0	0	0	0	0	0	0	0	0	0	0	0	0	0	0	0	0	0
AC079767.2	5	green	0	0	0	0	0	0	0	0	0	0	0	1	0	0	0	0	0	0	0	0	0	0	0	0	0	0	0	0	0	0	0	0	0	0	0	0	0	0	0	0	0
AC079776.2	12	tan	0	0	0	0	0	0	0	0	0	0	0	0	0	0	0	0	0	0	0	0	0	0	0	0	0	0	0	0	0	0	0	0	0	0	0	1	0	0	0	0	0
AC079776.7	2	blue	0	1	0	0	0	0	0	0	0	0	0	0	0	0	0	0	0	0	0	0	0	0	0	0	0	0	0	0	0	0	0	0	0	0	0	0	0	0	0	0	0
AC079780.3	5	green	0	0	0	0	0	0	0	0	0	0	0	1	0	0	0	0	0	0	0	0	0	0	0	0	0	0	0	0	0	0	0	0	0	0	0	0	0	0	0	0	0
AC079781.1	5	green	0	0	0	0	0	0	0	0	0	0	0	1	0	0	0	0	0	0	0	0	0	0	0	0	0	0	0	0	0	0	0	0	0	0	0	0	0	0	0	0	0
AC079781.5	0	grey	0	0	0	0	0	0	0	0	0	0	0	0	0	1	0	0	0	0	0	0	0	0	0	0	0	0	0	0	0	0	0	0	0	0	0	0	0	0	0	0	0
AC079781.7	0	grey	0	0	0	0	0	0	0	0	0	0	0	0	0	1	0	0	0	0	0	0	0	0	0	0	0	0	0	0	0	0	0	0	0	0	0	0	0	0	0	0	0
AC079781.8	0	grey	0	0	0	0	0	0	0	0	0	0	0	0	0	1	0	0	0	0	0	0	0	0	0	0	0	0	0	0	0	0	0	0	0	0	0	0	0	0	0	0	0
AC079781.9	18	lightgreen	0	0	0	0	0	0	0	0	0	0	0	0	0	0	0	0	1	0	0	0	0	0	0	0	0	0	0	0	0	0	0	0	0	0	0	0	0	0	0	0	0
AC079790.2	19	lightyellow	0	0	0	0	0	0	0	0	0	0	0	0	0	0	0	0	0	1	0	0	0	0	0	0	0	0	0	0	0	0	0	0	0	0	0	0	0	0	0	0	0
AC079807.2	1	turquoise	0	0	0	0	0	0	0	0	0	0	0	0	0	0	0	0	0	0	0	0	0	0	0	0	0	0	0	0	0	0	0	0	0	0	0	0	1	0	0	0	0
AC079807.3	29	saddlebrown	0	0	0	0	0	0	0	0	0	0	0	0	0	0	0	0	0	0	0	0	0	0	0	0	0	0	0	0	0	1	0	0	0	0	0	0	0	0	0	0	0
AC079834.1	10	purple	0	0	0	0	0	0	0	0	0	0	0	0	0	0	0	0	0	0	0	0	0	0	0	0	0	0	1	0	0	0	0	0	0	0	0	0	0	0	0	0	0
AC079922.2	10	purple	0	0	0	0	0	0	0	0	0	0	0	0	0	0	0	0	0	0	0	0	0	0	0	0	0	0	1	0	0	0	0	0	0	0	0	0	0	0	0	0	0
AC079922.3	1	turquoise	0	0	0	0	0	0	0	0	0	0	0	0	0	0	0	0	0	0	0	0	0	0	0	0	0	0	0	0	0	0	0	0	0	0	0	0	1	0	0	0	0
AC079945.1	32	violet	0	0	0	0	0	0	0	0	0	0	0	0	0	0	0	0	0	0	0	0	0	0	0	0	0	0	0	0	0	0	0	0	0	0	0	0	0	1	0	0	0
AC079949.1	30	steelblue	0	0	0	0	0	0	0	0	0	0	0	0	0	0	0	0	0	0	0	0	0	0	0	0	0	0	0	0	0	0	0	0	0	0	1	0	0	0	0	0	0
AC080125.1	1	turquoise	0	0	0	0	0	0	0	0	0	0	0	0	0	0	0	0	0	0	0	0	0	0	0	0	0	0	0	0	0	0	0	0	0	0	0	0	1	0	0	0	0
AC083799.1	5	green	0	0	0	0	0	0	0	0	0	0	0	1	0	0	0	0	0	0	0	0	0	0	0	0	0	0	0	0	0	0	0	0	0	0	0	0	0	0	0	0	0
AC083822.1	29	saddlebrown	0	0	0	0	0	0	0	0	0	0	0	0	0	0	0	0	0	0	0	0	0	0	0	0	0	0	0	0	0	1	0	0	0	0	0	0	0	0	0	0	0
AC083822.2	0	grey	0	0	0	0	0	0	0	0	0	0	0	0	0	1	0	0	0	0	0	0	0	0	0	0	0	0	0	0	0	0	0	0	0	0	0	0	0	0	0	0	0
AC083855.4	2	blue	0	1	0	0	0	0	0	0	0	0	0	0	0	0	0	0	0	0	0	0	0	0	0	0	0	0	0	0	0	0	0	0	0	0	0	0	0	0	0	0	0
AC083862.1	12	tan	0	0	0	0	0	0	0	0	0	0	0	0	0	0	0	0	0	0	0	0	0	0	0	0	0	0	0	0	0	0	0	0	0	0	0	1	0	0	0	0	0
AC083862.6	8	pink	0	0	0	0	0	0	0	0	0	0	0	0	0	0	0	0	0	0	0	0	0	0	0	0	1	0	0	0	0	0	0	0	0	0	0	0	0	0	0	0	0
AC083863.7	17	grey60	0	0	0	0	0	0	0	0	0	0	0	0	0	0	1	0	0	0	0	0	0	0	0	0	0	0	0	0	0	0	0	0	0	0	0	0	0	0	0	0	0
AC083864.3	13	salmon	0	0	0	0	0	0	0	0	0	0	0	0	0	0	0	0	0	0	0	0	0	0	0	0	0	0	0	0	0	0	1	0	0	0	0	0	0	0	0	0	0
AC083867.4	4	yellow	0	0	0	0	0	0	0	0	0	0	0	0	0	0	0	0	0	0	0	0	0	0	0	0	0	0	0	0	0	0	0	0	0	0	0	0	0	0	0	1	0
AC083873.4	4	yellow	0	0	0	0	0	0	0	0	0	0	0	0	0	0	0	0	0	0	0	0	0	0	0	0	0	0	0	0	0	0	0	0	0	0	0	0	0	0	0	1	0
AC083884.8	1	turquoise	0	0	0	0	0	0	0	0	0	0	0	0	0	0	0	0	0	0	0	0	0	0	0	0	0	0	0	0	0	0	0	0	0	0	0	0	1	0	0	0	0
AC083949.1	1	turquoise	0	0	0	0	0	0	0	0	0	0	0	0	0	0	0	0	0	0	0	0	0	0	0	0	0	0	0	0	0	0	0	0	0	0	0	0	1	0	0	0	0
AC084018.1	7	black	1	0	0	0	0	0	0	0	0	0	0	0	0	0	0	0	0	0	0	0	0	0	0	0	0	0	0	0	0	0	0	0	0	0	0	0	0	0	0	0	0
AC084031.1	5	green	0	0	0	0	0	0	0	0	0	0	0	1	0	0	0	0	0	0	0	0	0	0	0	0	0	0	0	0	0	0	0	0	0	0	0	0	0	0	0	0	0
AC084058.1	1	turquoise	0	0	0	0	0	0	0	0	0	0	0	0	0	0	0	0	0	0	0	0	0	0	0	0	0	0	0	0	0	0	0	0	0	0	0	0	1	0	0	0	0
AC084082.1	0	grey	0	0	0	0	0	0	0	0	0	0	0	0	0	1	0	0	0	0	0	0	0	0	0	0	0	0	0	0	0	0	0	0	0	0	0	0	0	0	0	0	0
AC084083.1	30	steelblue	0	0	0	0	0	0	0	0	0	0	0	0	0	0	0	0	0	0	0	0	0	0	0	0	0	0	0	0	0	0	0	0	0	0	1	0	0	0	0	0	0
AC084125.1	0	grey	0	0	0	0	0	0	0	0	0	0	0	0	0	1	0	0	0	0	0	0	0	0	0	0	0	0	0	0	0	0	0	0	0	0	0	0	0	0	0	0	0
AC084125.4	4	yellow	0	0	0	0	0	0	0	0	0	0	0	0	0	0	0	0	0	0	0	0	0	0	0	0	0	0	0	0	0	0	0	0	0	0	0	0	0	0	0	1	0
AC084149.2	12	tan	0	0	0	0	0	0	0	0	0	0	0	0	0	0	0	0	0	0	0	0	0	0	0	0	0	0	0	0	0	0	0	0	0	0	0	1	0	0	0	0	0
AC084368.1	0	grey	0	0	0	0	0	0	0	0	0	0	0	0	0	1	0	0	0	0	0	0	0	0	0	0	0	0	0	0	0	0	0	0	0	0	0	0	0	0	0	0	0
AC084782.1	4	yellow	0	0	0	0	0	0	0	0	0	0	0	0	0	0	0	0	0	0	0	0	0	0	0	0	0	0	0	0	0	0	0	0	0	0	0	0	0	0	0	1	0
AC084809.2	2	blue	0	1	0	0	0	0	0	0	0	0	0	0	0	0	0	0	0	0	0	0	0	0	0	0	0	0	0	0	0	0	0	0	0	0	0	0	0	0	0	0	0
AC084809.3	1	turquoise	0	0	0	0	0	0	0	0	0	0	0	0	0	0	0	0	0	0	0	0	0	0	0	0	0	0	0	0	0	0	0	0	0	0	0	0	1	0	0	0	0
AC087163.2	1	turquoise	0	0	0	0	0	0	0	0	0	0	0	0	0	0	0	0	0	0	0	0	0	0	0	0	0	0	0	0	0	0	0	0	0	0	0	0	1	0	0	0	0
AC087269.1	9	magenta	0	0	0	0	0	0	0	0	0	0	0	0	0	0	0	0	0	0	1	0	0	0	0	0	0	0	0	0	0	0	0	0	0	0	0	0	0	0	0	0	0
AC087289.1	1	turquoise	0	0	0	0	0	0	0	0	0	0	0	0	0	0	0	0	0	0	0	0	0	0	0	0	0	0	0	0	0	0	0	0	0	0	0	0	1	0	0	0	0
AC087392.3	1	turquoise	0	0	0	0	0	0	0	0	0	0	0	0	0	0	0	0	0	0	0	0	0	0	0	0	0	0	0	0	0	0	0	0	0	0	0	0	1	0	0	0	0
AC087393.1	3	brown	0	0	1	0	0	0	0	0	0	0	0	0	0	0	0	0	0	0	0	0	0	0	0	0	0	0	0	0	0	0	0	0	0	0	0	0	0	0	0	0	0
AC087491.2	22	darkgreen	0	0	0	0	1	0	0	0	0	0	0	0	0	0	0	0	0	0	0	0	0	0	0	0	0	0	0	0	0	0	0	0	0	0	0	0	0	0	0	0	0
AC087499.10	14	cyan	0	0	0	1	0	0	0	0	0	0	0	0	0	0	0	0	0	0	0	0	0	0	0	0	0	0	0	0	0	0	0	0	0	0	0	0	0	0	0	0	0
AC087499.5	2	blue	0	1	0	0	0	0	0	0	0	0	0	0	0	0	0	0	0	0	0	0	0	0	0	0	0	0	0	0	0	0	0	0	0	0	0	0	0	0	0	0	0
AC087590.3	3	brown	0	0	1	0	0	0	0	0	0	0	0	0	0	0	0	0	0	0	0	0	0	0	0	0	0	0	0	0	0	0	0	0	0	0	0	0	0	0	0	0	0
AC087650.1	18	lightgreen	0	0	0	0	0	0	0	0	0	0	0	0	0	0	0	0	1	0	0	0	0	0	0	0	0	0	0	0	0	0	0	0	0	0	0	0	0	0	0	0	0
AC087650.2	0	grey	0	0	0	0	0	0	0	0	0	0	0	0	0	1	0	0	0	0	0	0	0	0	0	0	0	0	0	0	0	0	0	0	0	0	0	0	0	0	0	0	0
AC087651.1	11	greenyellow	0	0	0	0	0	0	0	0	0	0	0	0	1	0	0	0	0	0	0	0	0	0	0	0	0	0	0	0	0	0	0	0	0	0	0	0	0	0	0	0	0
AC087738.1	0	grey	0	0	0	0	0	0	0	0	0	0	0	0	0	1	0	0	0	0	0	0	0	0	0	0	0	0	0	0	0	0	0	0	0	0	0	0	0	0	0	0	0
AC087742.1	0	grey	0	0	0	0	0	0	0	0	0	0	0	0	0	1	0	0	0	0	0	0	0	0	0	0	0	0	0	0	0	0	0	0	0	0	0	0	0	0	0	0	0
AC087886.1	37	skyblue3	0	0	0	0	0	0	0	0	0	0	0	0	0	0	0	0	0	0	0	0	0	0	0	0	0	0	0	0	0	0	0	0	0	1	0	0	0	0	0	0	0
AC089999.1	25	orange	0	0	0	0	0	0	0	0	0	0	0	0	0	0	0	0	0	0	0	0	0	1	0	0	0	0	0	0	0	0	0	0	0	0	0	0	0	0	0	0	0
AC090044.2	7	black	1	0	0	0	0	0	0	0	0	0	0	0	0	0	0	0	0	0	0	0	0	0	0	0	0	0	0	0	0	0	0	0	0	0	0	0	0	0	0	0	0
AC090099.2	12	tan	0	0	0	0	0	0	0	0	0	0	0	0	0	0	0	0	0	0	0	0	0	0	0	0	0	0	0	0	0	0	0	0	0	0	0	1	0	0	0	0	0
AC090181.1	0	grey	0	0	0	0	0	0	0	0	0	0	0	0	0	1	0	0	0	0	0	0	0	0	0	0	0	0	0	0	0	0	0	0	0	0	0	0	0	0	0	0	0
AC090186.1	6	red	0	0	0	0	0	0	0	0	0	0	0	0	0	0	0	0	0	0	0	0	0	0	0	0	0	0	0	1	0	0	0	0	0	0	0	0	0	0	0	0	0
AC090286.2	1	turquoise	0	0	0	0	0	0	0	0	0	0	0	0	0	0	0	0	0	0	0	0	0	0	0	0	0	0	0	0	0	0	0	0	0	0	0	0	1	0	0	0	0
AC090324.1	0	grey	0	0	0	0	0	0	0	0	0	0	0	0	0	1	0	0	0	0	0	0	0	0	0	0	0	0	0	0	0	0	0	0	0	0	0	0	0	0	0	0	0
AC090360.1	30	steelblue	0	0	0	0	0	0	0	0	0	0	0	0	0	0	0	0	0	0	0	0	0	0	0	0	0	0	0	0	0	0	0	0	0	0	1	0	0	0	0	0	0
AC090377.2	1	turquoise	0	0	0	0	0	0	0	0	0	0	0	0	0	0	0	0	0	0	0	0	0	0	0	0	0	0	0	0	0	0	0	0	0	0	0	0	1	0	0	0	0
AC090421.1	8	pink	0	0	0	0	0	0	0	0	0	0	0	0	0	0	0	0	0	0	0	0	0	0	0	0	1	0	0	0	0	0	0	0	0	0	0	0	0	0	0	0	0
AC090425.1	2	blue	0	1	0	0	0	0	0	0	0	0	0	0	0	0	0	0	0	0	0	0	0	0	0	0	0	0	0	0	0	0	0	0	0	0	0	0	0	0	0	0	0
AC090453.1	18	lightgreen	0	0	0	0	0	0	0	0	0	0	0	0	0	0	0	0	1	0	0	0	0	0	0	0	0	0	0	0	0	0	0	0	0	0	0	0	0	0	0	0	0
AC090510.1	2	blue	0	1	0	0	0	0	0	0	0	0	0	0	0	0	0	0	0	0	0	0	0	0	0	0	0	0	0	0	0	0	0	0	0	0	0	0	0	0	0	0	0
AC090517.1	0	grey	0	0	0	0	0	0	0	0	0	0	0	0	0	1	0	0	0	0	0	0	0	0	0	0	0	0	0	0	0	0	0	0	0	0	0	0	0	0	0	0	0
AC090518.1	0	grey	0	0	0	0	0	0	0	0	0	0	0	0	0	1	0	0	0	0	0	0	0	0	0	0	0	0	0	0	0	0	0	0	0	0	0	0	0	0	0	0	0
AC090519.1	13	salmon	0	0	0	0	0	0	0	0	0	0	0	0	0	0	0	0	0	0	0	0	0	0	0	0	0	0	0	0	0	0	1	0	0	0	0	0	0	0	0	0	0
AC090519.7	29	saddlebrown	0	0	0	0	0	0	0	0	0	0	0	0	0	0	0	0	0	0	0	0	0	0	0	0	0	0	0	0	0	1	0	0	0	0	0	0	0	0	0	0	0
AC090571.1	3	brown	0	0	1	0	0	0	0	0	0	0	0	0	0	0	0	0	0	0	0	0	0	0	0	0	0	0	0	0	0	0	0	0	0	0	0	0	0	0	0	0	0
AC090587.2	15	midnightblue	0	0	0	0	0	0	0	0	0	0	0	0	0	0	0	0	0	0	0	0	1	0	0	0	0	0	0	0	0	0	0	0	0	0	0	0	0	0	0	0	0
AC090587.4	2	blue	0	1	0	0	0	0	0	0	0	0	0	0	0	0	0	0	0	0	0	0	0	0	0	0	0	0	0	0	0	0	0	0	0	0	0	0	0	0	0	0	0
AC090587.5	2	blue	0	1	0	0	0	0	0	0	0	0	0	0	0	0	0	0	0	0	0	0	0	0	0	0	0	0	0	0	0	0	0	0	0	0	0	0	0	0	0	0	0
AC090602.1	10	purple	0	0	0	0	0	0	0	0	0	0	0	0	0	0	0	0	0	0	0	0	0	0	0	0	0	0	1	0	0	0	0	0	0	0	0	0	0	0	0	0	0
AC090602.2	18	lightgreen	0	0	0	0	0	0	0	0	0	0	0	0	0	0	0	0	1	0	0	0	0	0	0	0	0	0	0	0	0	0	0	0	0	0	0	0	0	0	0	0	0
AC090616.2	5	green	0	0	0	0	0	0	0	0	0	0	0	1	0	0	0	0	0	0	0	0	0	0	0	0	0	0	0	0	0	0	0	0	0	0	0	0	0	0	0	0	0
AC090625.1	0	grey	0	0	0	0	0	0	0	0	0	0	0	0	0	1	0	0	0	0	0	0	0	0	0	0	0	0	0	0	0	0	0	0	0	0	0	0	0	0	0	0	0
AC090627.1	28	skyblue	0	0	0	0	0	0	0	0	0	0	0	0	0	0	0	0	0	0	0	0	0	0	0	0	0	0	0	0	0	0	0	0	1	0	0	0	0	0	0	0	0
AC090670.1	11	greenyellow	0	0	0	0	0	0	0	0	0	0	0	0	1	0	0	0	0	0	0	0	0	0	0	0	0	0	0	0	0	0	0	0	0	0	0	0	0	0	0	0	0
AC090696.2	25	orange	0	0	0	0	0	0	0	0	0	0	0	0	0	0	0	0	0	0	0	0	0	1	0	0	0	0	0	0	0	0	0	0	0	0	0	0	0	0	0	0	0
AC090699.1	1	turquoise	0	0	0	0	0	0	0	0	0	0	0	0	0	0	0	0	0	0	0	0	0	0	0	0	0	0	0	0	0	0	0	0	0	0	0	0	1	0	0	0	0
AC090804.1	0	grey	0	0	0	0	0	0	0	0	0	0	0	0	0	1	0	0	0	0	0	0	0	0	0	0	0	0	0	0	0	0	0	0	0	0	0	0	0	0	0	0	0
AC090825.3	0	grey	0	0	0	0	0	0	0	0	0	0	0	0	0	1	0	0	0	0	0	0	0	0	0	0	0	0	0	0	0	0	0	0	0	0	0	0	0	0	0	0	0
AC090841.1	0	grey	0	0	0	0	0	0	0	0	0	0	0	0	0	1	0	0	0	0	0	0	0	0	0	0	0	0	0	0	0	0	0	0	0	0	0	0	0	0	0	0	0
AC090937.2	5	green	0	0	0	0	0	0	0	0	0	0	0	1	0	0	0	0	0	0	0	0	0	0	0	0	0	0	0	0	0	0	0	0	0	0	0	0	0	0	0	0	0
AC090939.1	9	magenta	0	0	0	0	0	0	0	0	0	0	0	0	0	0	0	0	0	0	1	0	0	0	0	0	0	0	0	0	0	0	0	0	0	0	0	0	0	0	0	0	0
AC090939.2	9	magenta	0	0	0	0	0	0	0	0	0	0	0	0	0	0	0	0	0	0	1	0	0	0	0	0	0	0	0	0	0	0	0	0	0	0	0	0	0	0	0	0	0
AC090945.1	17	grey60	0	0	0	0	0	0	0	0	0	0	0	0	0	0	1	0	0	0	0	0	0	0	0	0	0	0	0	0	0	0	0	0	0	0	0	0	0	0	0	0	0
AC090952.4	3	brown	0	0	1	0	0	0	0	0	0	0	0	0	0	0	0	0	0	0	0	0	0	0	0	0	0	0	0	0	0	0	0	0	0	0	0	0	0	0	0	0	0
AC090953.1	12	tan	0	0	0	0	0	0	0	0	0	0	0	0	0	0	0	0	0	0	0	0	0	0	0	0	0	0	0	0	0	0	0	0	0	0	0	1	0	0	0	0	0
AC090984.1	5	green	0	0	0	0	0	0	0	0	0	0	0	1	0	0	0	0	0	0	0	0	0	0	0	0	0	0	0	0	0	0	0	0	0	0	0	0	0	0	0	0	0
AC091038.1	32	violet	0	0	0	0	0	0	0	0	0	0	0	0	0	0	0	0	0	0	0	0	0	0	0	0	0	0	0	0	0	0	0	0	0	0	0	0	0	1	0	0	0
AC091047.1	30	steelblue	0	0	0	0	0	0	0	0	0	0	0	0	0	0	0	0	0	0	0	0	0	0	0	0	0	0	0	0	0	0	0	0	0	0	1	0	0	0	0	0	0
AC091062.2	11	greenyellow	0	0	0	0	0	0	0	0	0	0	0	0	1	0	0	0	0	0	0	0	0	0	0	0	0	0	0	0	0	0	0	0	0	0	0	0	0	0	0	0	0
AC091132.2	11	greenyellow	0	0	0	0	0	0	0	0	0	0	0	0	1	0	0	0	0	0	0	0	0	0	0	0	0	0	0	0	0	0	0	0	0	0	0	0	0	0	0	0	0
AC091133.1	1	turquoise	0	0	0	0	0	0	0	0	0	0	0	0	0	0	0	0	0	0	0	0	0	0	0	0	0	0	0	0	0	0	0	0	0	0	0	0	1	0	0	0	0
AC091153.1	9	magenta	0	0	0	0	0	0	0	0	0	0	0	0	0	0	0	0	0	0	1	0	0	0	0	0	0	0	0	0	0	0	0	0	0	0	0	0	0	0	0	0	0
AC091153.4	15	midnightblue	0	0	0	0	0	0	0	0	0	0	0	0	0	0	0	0	0	0	0	0	1	0	0	0	0	0	0	0	0	0	0	0	0	0	0	0	0	0	0	0	0
AC091167.1	0	grey	0	0	0	0	0	0	0	0	0	0	0	0	0	1	0	0	0	0	0	0	0	0	0	0	0	0	0	0	0	0	0	0	0	0	0	0	0	0	0	0	0
AC091167.2	1	turquoise	0	0	0	0	0	0	0	0	0	0	0	0	0	0	0	0	0	0	0	0	0	0	0	0	0	0	0	0	0	0	0	0	0	0	0	0	1	0	0	0	0
AC091167.4	0	grey	0	0	0	0	0	0	0	0	0	0	0	0	0	1	0	0	0	0	0	0	0	0	0	0	0	0	0	0	0	0	0	0	0	0	0	0	0	0	0	0	0
AC091171.1	8	pink	0	0	0	0	0	0	0	0	0	0	0	0	0	0	0	0	0	0	0	0	0	0	0	0	1	0	0	0	0	0	0	0	0	0	0	0	0	0	0	0	0
AC091172.1	20	royalblue	0	0	0	0	0	0	0	0	0	0	0	0	0	0	0	0	0	0	0	0	0	0	0	0	0	0	0	0	1	0	0	0	0	0	0	0	0	0	0	0	0
AC091177.1	34	darkmagenta	0	0	0	0	0	0	1	0	0	0	0	0	0	0	0	0	0	0	0	0	0	0	0	0	0	0	0	0	0	0	0	0	0	0	0	0	0	0	0	0	0
AC091189.1	30	steelblue	0	0	0	0	0	0	0	0	0	0	0	0	0	0	0	0	0	0	0	0	0	0	0	0	0	0	0	0	0	0	0	0	0	0	1	0	0	0	0	0	0
AC091304.4	18	lightgreen	0	0	0	0	0	0	0	0	0	0	0	0	0	0	0	0	1	0	0	0	0	0	0	0	0	0	0	0	0	0	0	0	0	0	0	0	0	0	0	0	0
AC091492.2	6	red	0	0	0	0	0	0	0	0	0	0	0	0	0	0	0	0	0	0	0	0	0	0	0	0	0	0	0	1	0	0	0	0	0	0	0	0	0	0	0	0	0
AC091551.1	2	blue	0	1	0	0	0	0	0	0	0	0	0	0	0	0	0	0	0	0	0	0	0	0	0	0	0	0	0	0	0	0	0	0	0	0	0	0	0	0	0	0	0
AC091558.1	6	red	0	0	0	0	0	0	0	0	0	0	0	0	0	0	0	0	0	0	0	0	0	0	0	0	0	0	0	1	0	0	0	0	0	0	0	0	0	0	0	0	0
AC091602.1	32	violet	0	0	0	0	0	0	0	0	0	0	0	0	0	0	0	0	0	0	0	0	0	0	0	0	0	0	0	0	0	0	0	0	0	0	0	0	0	1	0	0	0
AC091609.1	13	salmon	0	0	0	0	0	0	0	0	0	0	0	0	0	0	0	0	0	0	0	0	0	0	0	0	0	0	0	0	0	0	1	0	0	0	0	0	0	0	0	0	0
AC091611.1	0	grey	0	0	0	0	0	0	0	0	0	0	0	0	0	1	0	0	0	0	0	0	0	0	0	0	0	0	0	0	0	0	0	0	0	0	0	0	0	0	0	0	0
AC091633.2	10	purple	0	0	0	0	0	0	0	0	0	0	0	0	0	0	0	0	0	0	0	0	0	0	0	0	0	0	1	0	0	0	0	0	0	0	0	0	0	0	0	0	0
AC091633.3	2	blue	0	1	0	0	0	0	0	0	0	0	0	0	0	0	0	0	0	0	0	0	0	0	0	0	0	0	0	0	0	0	0	0	0	0	0	0	0	0	0	0	0
AC091729.9	14	cyan	0	0	0	1	0	0	0	0	0	0	0	0	0	0	0	0	0	0	0	0	0	0	0	0	0	0	0	0	0	0	0	0	0	0	0	0	0	0	0	0	0
AC091736.10	31	paleturquoise	0	0	0	0	0	0	0	0	0	0	0	0	0	0	0	0	0	0	0	0	0	0	0	1	0	0	0	0	0	0	0	0	0	0	0	0	0	0	0	0	0
AC091736.11	31	paleturquoise	0	0	0	0	0	0	0	0	0	0	0	0	0	0	0	0	0	0	0	0	0	0	0	1	0	0	0	0	0	0	0	0	0	0	0	0	0	0	0	0	0
AC091814.2	37	skyblue3	0	0	0	0	0	0	0	0	0	0	0	0	0	0	0	0	0	0	0	0	0	0	0	0	0	0	0	0	0	0	0	0	0	1	0	0	0	0	0	0	0
AC091878.1	9	magenta	0	0	0	0	0	0	0	0	0	0	0	0	0	0	0	0	0	0	1	0	0	0	0	0	0	0	0	0	0	0	0	0	0	0	0	0	0	0	0	0	0
AC091960.1	0	grey	0	0	0	0	0	0	0	0	0	0	0	0	0	1	0	0	0	0	0	0	0	0	0	0	0	0	0	0	0	0	0	0	0	0	0	0	0	0	0	0	0
AC091969.1	25	orange	0	0	0	0	0	0	0	0	0	0	0	0	0	0	0	0	0	0	0	0	0	1	0	0	0	0	0	0	0	0	0	0	0	0	0	0	0	0	0	0	0
AC092013.1	3	brown	0	0	1	0	0	0	0	0	0	0	0	0	0	0	0	0	0	0	0	0	0	0	0	0	0	0	0	0	0	0	0	0	0	0	0	0	0	0	0	0	0
AC092106.1	4	yellow	0	0	0	0	0	0	0	0	0	0	0	0	0	0	0	0	0	0	0	0	0	0	0	0	0	0	0	0	0	0	0	0	0	0	0	0	0	0	0	1	0
AC092123.1	15	midnightblue	0	0	0	0	0	0	0	0	0	0	0	0	0	0	0	0	0	0	0	0	1	0	0	0	0	0	0	0	0	0	0	0	0	0	0	0	0	0	0	0	0
AC092143.1	9	magenta	0	0	0	0	0	0	0	0	0	0	0	0	0	0	0	0	0	0	1	0	0	0	0	0	0	0	0	0	0	0	0	0	0	0	0	0	0	0	0	0	0
AC092143.2	7	black	1	0	0	0	0	0	0	0	0	0	0	0	0	0	0	0	0	0	0	0	0	0	0	0	0	0	0	0	0	0	0	0	0	0	0	0	0	0	0	0	0
AC092155.1	0	grey	0	0	0	0	0	0	0	0	0	0	0	0	0	1	0	0	0	0	0	0	0	0	0	0	0	0	0	0	0	0	0	0	0	0	0	0	0	0	0	0	0
AC092159.2	4	yellow	0	0	0	0	0	0	0	0	0	0	0	0	0	0	0	0	0	0	0	0	0	0	0	0	0	0	0	0	0	0	0	0	0	0	0	0	0	0	0	1	0
AC092170.1	17	grey60	0	0	0	0	0	0	0	0	0	0	0	0	0	0	1	0	0	0	0	0	0	0	0	0	0	0	0	0	0	0	0	0	0	0	0	0	0	0	0	0	0
AC092171.1	9	magenta	0	0	0	0	0	0	0	0	0	0	0	0	0	0	0	0	0	0	1	0	0	0	0	0	0	0	0	0	0	0	0	0	0	0	0	0	0	0	0	0	0
AC092171.2	2	blue	0	1	0	0	0	0	0	0	0	0	0	0	0	0	0	0	0	0	0	0	0	0	0	0	0	0	0	0	0	0	0	0	0	0	0	0	0	0	0	0	0
AC092171.4	2	blue	0	1	0	0	0	0	0	0	0	0	0	0	0	0	0	0	0	0	0	0	0	0	0	0	0	0	0	0	0	0	0	0	0	0	0	0	0	0	0	0	0
AC092279.1	30	steelblue	0	0	0	0	0	0	0	0	0	0	0	0	0	0	0	0	0	0	0	0	0	0	0	0	0	0	0	0	0	0	0	0	0	0	1	0	0	0	0	0	0
AC092295.4	1	turquoise	0	0	0	0	0	0	0	0	0	0	0	0	0	0	0	0	0	0	0	0	0	0	0	0	0	0	0	0	0	0	0	0	0	0	0	0	1	0	0	0	0
AC092295.5	1	turquoise	0	0	0	0	0	0	0	0	0	0	0	0	0	0	0	0	0	0	0	0	0	0	0	0	0	0	0	0	0	0	0	0	0	0	0	0	1	0	0	0	0
AC092295.7	8	pink	0	0	0	0	0	0	0	0	0	0	0	0	0	0	0	0	0	0	0	0	0	0	0	0	1	0	0	0	0	0	0	0	0	0	0	0	0	0	0	0	0
AC092296.1	21	darkred	0	0	0	0	0	0	0	0	0	1	0	0	0	0	0	0	0	0	0	0	0	0	0	0	0	0	0	0	0	0	0	0	0	0	0	0	0	0	0	0	0
AC092329.1	1	turquoise	0	0	0	0	0	0	0	0	0	0	0	0	0	0	0	0	0	0	0	0	0	0	0	0	0	0	0	0	0	0	0	0	0	0	0	0	1	0	0	0	0
AC092384.1	7	black	1	0	0	0	0	0	0	0	0	0	0	0	0	0	0	0	0	0	0	0	0	0	0	0	0	0	0	0	0	0	0	0	0	0	0	0	0	0	0	0	0
AC092431.1	12	tan	0	0	0	0	0	0	0	0	0	0	0	0	0	0	0	0	0	0	0	0	0	0	0	0	0	0	0	0	0	0	0	0	0	0	0	1	0	0	0	0	0
AC092436.1	0	grey	0	0	0	0	0	0	0	0	0	0	0	0	0	1	0	0	0	0	0	0	0	0	0	0	0	0	0	0	0	0	0	0	0	0	0	0	0	0	0	0	0
AC092436.3	0	grey	0	0	0	0	0	0	0	0	0	0	0	0	0	1	0	0	0	0	0	0	0	0	0	0	0	0	0	0	0	0	0	0	0	0	0	0	0	0	0	0	0
AC092436.4	0	grey	0	0	0	0	0	0	0	0	0	0	0	0	0	1	0	0	0	0	0	0	0	0	0	0	0	0	0	0	0	0	0	0	0	0	0	0	0	0	0	0	0
AC092534.1	2	blue	0	1	0	0	0	0	0	0	0	0	0	0	0	0	0	0	0	0	0	0	0	0	0	0	0	0	0	0	0	0	0	0	0	0	0	0	0	0	0	0	0
AC092535.2	9	magenta	0	0	0	0	0	0	0	0	0	0	0	0	0	0	0	0	0	0	1	0	0	0	0	0	0	0	0	0	0	0	0	0	0	0	0	0	0	0	0	0	0
AC092535.3	7	black	1	0	0	0	0	0	0	0	0	0	0	0	0	0	0	0	0	0	0	0	0	0	0	0	0	0	0	0	0	0	0	0	0	0	0	0	0	0	0	0	0
AC092570.4	3	brown	0	0	1	0	0	0	0	0	0	0	0	0	0	0	0	0	0	0	0	0	0	0	0	0	0	0	0	0	0	0	0	0	0	0	0	0	0	0	0	0	0
AC092573.2	4	yellow	0	0	0	0	0	0	0	0	0	0	0	0	0	0	0	0	0	0	0	0	0	0	0	0	0	0	0	0	0	0	0	0	0	0	0	0	0	0	0	1	0
AC092574.1	17	grey60	0	0	0	0	0	0	0	0	0	0	0	0	0	0	1	0	0	0	0	0	0	0	0	0	0	0	0	0	0	0	0	0	0	0	0	0	0	0	0	0	0
AC092574.2	0	grey	0	0	0	0	0	0	0	0	0	0	0	0	0	1	0	0	0	0	0	0	0	0	0	0	0	0	0	0	0	0	0	0	0	0	0	0	0	0	0	0	0
AC092580.4	22	darkgreen	0	0	0	0	1	0	0	0	0	0	0	0	0	0	0	0	0	0	0	0	0	0	0	0	0	0	0	0	0	0	0	0	0	0	0	0	0	0	0	0	0
AC092597.3	16	lightcyan	0	0	0	0	0	0	0	0	0	0	0	0	0	0	0	1	0	0	0	0	0	0	0	0	0	0	0	0	0	0	0	0	0	0	0	0	0	0	0	0	0
AC092610.12	10	purple	0	0	0	0	0	0	0	0	0	0	0	0	0	0	0	0	0	0	0	0	0	0	0	0	0	0	1	0	0	0	0	0	0	0	0	0	0	0	0	0	0
AC092614.2	28	skyblue	0	0	0	0	0	0	0	0	0	0	0	0	0	0	0	0	0	0	0	0	0	0	0	0	0	0	0	0	0	0	0	0	1	0	0	0	0	0	0	0	0
AC092620.2	8	pink	0	0	0	0	0	0	0	0	0	0	0	0	0	0	0	0	0	0	0	0	0	0	0	0	1	0	0	0	0	0	0	0	0	0	0	0	0	0	0	0	0
AC092638.2	1	turquoise	0	0	0	0	0	0	0	0	0	0	0	0	0	0	0	0	0	0	0	0	0	0	0	0	0	0	0	0	0	0	0	0	0	0	0	0	1	0	0	0	0
AC092641.2	5	green	0	0	0	0	0	0	0	0	0	0	0	1	0	0	0	0	0	0	0	0	0	0	0	0	0	0	0	0	0	0	0	0	0	0	0	0	0	0	0	0	0
AC092642.1	6	red	0	0	0	0	0	0	0	0	0	0	0	0	0	0	0	0	0	0	0	0	0	0	0	0	0	0	0	1	0	0	0	0	0	0	0	0	0	0	0	0	0
AC092646.2	5	green	0	0	0	0	0	0	0	0	0	0	0	1	0	0	0	0	0	0	0	0	0	0	0	0	0	0	0	0	0	0	0	0	0	0	0	0	0	0	0	0	0
AC092652.1	3	brown	0	0	1	0	0	0	0	0	0	0	0	0	0	0	0	0	0	0	0	0	0	0	0	0	0	0	0	0	0	0	0	0	0	0	0	0	0	0	0	0	0
AC092656.1	39	orangered4	0	0	0	0	0	0	0	0	0	0	0	0	0	0	0	0	0	0	0	0	0	0	1	0	0	0	0	0	0	0	0	0	0	0	0	0	0	0	0	0	0
AC092661.1	2	blue	0	1	0	0	0	0	0	0	0	0	0	0	0	0	0	0	0	0	0	0	0	0	0	0	0	0	0	0	0	0	0	0	0	0	0	0	0	0	0	0	0
AC092661.2	5	green	0	0	0	0	0	0	0	0	0	0	0	1	0	0	0	0	0	0	0	0	0	0	0	0	0	0	0	0	0	0	0	0	0	0	0	0	0	0	0	0	0
AC092664.1	3	brown	0	0	1	0	0	0	0	0	0	0	0	0	0	0	0	0	0	0	0	0	0	0	0	0	0	0	0	0	0	0	0	0	0	0	0	0	0	0	0	0	0
AC092667.2	22	darkgreen	0	0	0	0	1	0	0	0	0	0	0	0	0	0	0	0	0	0	0	0	0	0	0	0	0	0	0	0	0	0	0	0	0	0	0	0	0	0	0	0	0
AC092669.1	11	greenyellow	0	0	0	0	0	0	0	0	0	0	0	0	1	0	0	0	0	0	0	0	0	0	0	0	0	0	0	0	0	0	0	0	0	0	0	0	0	0	0	0	0
AC092669.4	11	greenyellow	0	0	0	0	0	0	0	0	0	0	0	0	1	0	0	0	0	0	0	0	0	0	0	0	0	0	0	0	0	0	0	0	0	0	0	0	0	0	0	0	0
AC092669.5	27	white	0	0	0	0	0	0	0	0	0	0	0	0	0	0	0	0	0	0	0	0	0	0	0	0	0	0	0	0	0	0	0	0	0	0	0	0	0	0	1	0	0
AC092675.3	16	lightcyan	0	0	0	0	0	0	0	0	0	0	0	0	0	0	0	1	0	0	0	0	0	0	0	0	0	0	0	0	0	0	0	0	0	0	0	0	0	0	0	0	0
AC092675.4	4	yellow	0	0	0	0	0	0	0	0	0	0	0	0	0	0	0	0	0	0	0	0	0	0	0	0	0	0	0	0	0	0	0	0	0	0	0	0	0	0	0	1	0
AC092687.1	3	brown	0	0	1	0	0	0	0	0	0	0	0	0	0	0	0	0	0	0	0	0	0	0	0	0	0	0	0	0	0	0	0	0	0	0	0	0	0	0	0	0	0
AC092687.5	4	yellow	0	0	0	0	0	0	0	0	0	0	0	0	0	0	0	0	0	0	0	0	0	0	0	0	0	0	0	0	0	0	0	0	0	0	0	0	0	0	0	1	0
AC092798.2	18	lightgreen	0	0	0	0	0	0	0	0	0	0	0	0	0	0	0	0	1	0	0	0	0	0	0	0	0	0	0	0	0	0	0	0	0	0	0	0	0	0	0	0	0
AC092811.1	7	black	1	0	0	0	0	0	0	0	0	0	0	0	0	0	0	0	0	0	0	0	0	0	0	0	0	0	0	0	0	0	0	0	0	0	0	0	0	0	0	0	0
AC092828.1	0	grey	0	0	0	0	0	0	0	0	0	0	0	0	0	1	0	0	0	0	0	0	0	0	0	0	0	0	0	0	0	0	0	0	0	0	0	0	0	0	0	0	0
AC092835.2	1	turquoise	0	0	0	0	0	0	0	0	0	0	0	0	0	0	0	0	0	0	0	0	0	0	0	0	0	0	0	0	0	0	0	0	0	0	0	0	1	0	0	0	0
AC092839.1	32	violet	0	0	0	0	0	0	0	0	0	0	0	0	0	0	0	0	0	0	0	0	0	0	0	0	0	0	0	0	0	0	0	0	0	0	0	0	0	1	0	0	0
AC092865.1	0	grey	0	0	0	0	0	0	0	0	0	0	0	0	0	1	0	0	0	0	0	0	0	0	0	0	0	0	0	0	0	0	0	0	0	0	0	0	0	0	0	0	0
AC092910.2	0	grey	0	0	0	0	0	0	0	0	0	0	0	0	0	1	0	0	0	0	0	0	0	0	0	0	0	0	0	0	0	0	0	0	0	0	0	0	0	0	0	0	0
AC092933.3	10	purple	0	0	0	0	0	0	0	0	0	0	0	0	0	0	0	0	0	0	0	0	0	0	0	0	0	0	1	0	0	0	0	0	0	0	0	0	0	0	0	0	0
AC093081.1	5	green	0	0	0	0	0	0	0	0	0	0	0	1	0	0	0	0	0	0	0	0	0	0	0	0	0	0	0	0	0	0	0	0	0	0	0	0	0	0	0	0	0
AC093106.4	10	purple	0	0	0	0	0	0	0	0	0	0	0	0	0	0	0	0	0	0	0	0	0	0	0	0	0	0	1	0	0	0	0	0	0	0	0	0	0	0	0	0	0
AC093106.5	6	red	0	0	0	0	0	0	0	0	0	0	0	0	0	0	0	0	0	0	0	0	0	0	0	0	0	0	0	1	0	0	0	0	0	0	0	0	0	0	0	0	0
AC093106.7	10	purple	0	0	0	0	0	0	0	0	0	0	0	0	0	0	0	0	0	0	0	0	0	0	0	0	0	0	1	0	0	0	0	0	0	0	0	0	0	0	0	0	0
AC093107.7	18	lightgreen	0	0	0	0	0	0	0	0	0	0	0	0	0	0	0	0	1	0	0	0	0	0	0	0	0	0	0	0	0	0	0	0	0	0	0	0	0	0	0	0	0
AC093110.3	12	tan	0	0	0	0	0	0	0	0	0	0	0	0	0	0	0	0	0	0	0	0	0	0	0	0	0	0	0	0	0	0	0	0	0	0	0	1	0	0	0	0	0
AC093142.2	18	lightgreen	0	0	0	0	0	0	0	0	0	0	0	0	0	0	0	0	1	0	0	0	0	0	0	0	0	0	0	0	0	0	0	0	0	0	0	0	0	0	0	0	0
AC093159.1	3	brown	0	0	1	0	0	0	0	0	0	0	0	0	0	0	0	0	0	0	0	0	0	0	0	0	0	0	0	0	0	0	0	0	0	0	0	0	0	0	0	0	0
AC093162.3	0	grey	0	0	0	0	0	0	0	0	0	0	0	0	0	1	0	0	0	0	0	0	0	0	0	0	0	0	0	0	0	0	0	0	0	0	0	0	0	0	0	0	0
AC093162.5	7	black	1	0	0	0	0	0	0	0	0	0	0	0	0	0	0	0	0	0	0	0	0	0	0	0	0	0	0	0	0	0	0	0	0	0	0	0	0	0	0	0	0
AC093166.4	29	saddlebrown	0	0	0	0	0	0	0	0	0	0	0	0	0	0	0	0	0	0	0	0	0	0	0	0	0	0	0	0	0	1	0	0	0	0	0	0	0	0	0	0	0
AC093171.1	5	green	0	0	0	0	0	0	0	0	0	0	0	1	0	0	0	0	0	0	0	0	0	0	0	0	0	0	0	0	0	0	0	0	0	0	0	0	0	0	0	0	0
AC093311.1	0	grey	0	0	0	0	0	0	0	0	0	0	0	0	0	1	0	0	0	0	0	0	0	0	0	0	0	0	0	0	0	0	0	0	0	0	0	0	0	0	0	0	0
AC093311.2	0	grey	0	0	0	0	0	0	0	0	0	0	0	0	0	1	0	0	0	0	0	0	0	0	0	0	0	0	0	0	0	0	0	0	0	0	0	0	0	0	0	0	0
AC093311.3	0	grey	0	0	0	0	0	0	0	0	0	0	0	0	0	1	0	0	0	0	0	0	0	0	0	0	0	0	0	0	0	0	0	0	0	0	0	0	0	0	0	0	0
AC093311.4	30	steelblue	0	0	0	0	0	0	0	0	0	0	0	0	0	0	0	0	0	0	0	0	0	0	0	0	0	0	0	0	0	0	0	0	0	0	1	0	0	0	0	0	0
AC093323.3	6	red	0	0	0	0	0	0	0	0	0	0	0	0	0	0	0	0	0	0	0	0	0	0	0	0	0	0	0	1	0	0	0	0	0	0	0	0	0	0	0	0	0
AC093382.1	11	greenyellow	0	0	0	0	0	0	0	0	0	0	0	0	1	0	0	0	0	0	0	0	0	0	0	0	0	0	0	0	0	0	0	0	0	0	0	0	0	0	0	0	0
AC093388.3	1	turquoise	0	0	0	0	0	0	0	0	0	0	0	0	0	0	0	0	0	0	0	0	0	0	0	0	0	0	0	0	0	0	0	0	0	0	0	0	1	0	0	0	0
AC093390.1	17	grey60	0	0	0	0	0	0	0	0	0	0	0	0	0	0	1	0	0	0	0	0	0	0	0	0	0	0	0	0	0	0	0	0	0	0	0	0	0	0	0	0	0
AC093391.2	4	yellow	0	0	0	0	0	0	0	0	0	0	0	0	0	0	0	0	0	0	0	0	0	0	0	0	0	0	0	0	0	0	0	0	0	0	0	0	0	0	0	1	0
AC093415.2	2	blue	0	1	0	0	0	0	0	0	0	0	0	0	0	0	0	0	0	0	0	0	0	0	0	0	0	0	0	0	0	0	0	0	0	0	0	0	0	0	0	0	0
AC093415.3	2	blue	0	1	0	0	0	0	0	0	0	0	0	0	0	0	0	0	0	0	0	0	0	0	0	0	0	0	0	0	0	0	0	0	0	0	0	0	0	0	0	0	0
AC093415.5	15	midnightblue	0	0	0	0	0	0	0	0	0	0	0	0	0	0	0	0	0	0	0	0	1	0	0	0	0	0	0	0	0	0	0	0	0	0	0	0	0	0	0	0	0
AC093416.3	3	brown	0	0	1	0	0	0	0	0	0	0	0	0	0	0	0	0	0	0	0	0	0	0	0	0	0	0	0	0	0	0	0	0	0	0	0	0	0	0	0	0	0
AC093484.4	2	blue	0	1	0	0	0	0	0	0	0	0	0	0	0	0	0	0	0	0	0	0	0	0	0	0	0	0	0	0	0	0	0	0	0	0	0	0	0	0	0	0	0
AC093484.6	6	red	0	0	0	0	0	0	0	0	0	0	0	0	0	0	0	0	0	0	0	0	0	0	0	0	0	0	0	1	0	0	0	0	0	0	0	0	0	0	0	0	0
AC093495.4	7	black	1	0	0	0	0	0	0	0	0	0	0	0	0	0	0	0	0	0	0	0	0	0	0	0	0	0	0	0	0	0	0	0	0	0	0	0	0	0	0	0	0
AC093503.1	7	black	1	0	0	0	0	0	0	0	0	0	0	0	0	0	0	0	0	0	0	0	0	0	0	0	0	0	0	0	0	0	0	0	0	0	0	0	0	0	0	0	0
AC093510.2	8	pink	0	0	0	0	0	0	0	0	0	0	0	0	0	0	0	0	0	0	0	0	0	0	0	0	1	0	0	0	0	0	0	0	0	0	0	0	0	0	0	0	0
AC093555.1	6	red	0	0	0	0	0	0	0	0	0	0	0	0	0	0	0	0	0	0	0	0	0	0	0	0	0	0	0	1	0	0	0	0	0	0	0	0	0	0	0	0	0
AC093577.1	29	saddlebrown	0	0	0	0	0	0	0	0	0	0	0	0	0	0	0	0	0	0	0	0	0	0	0	0	0	0	0	0	0	1	0	0	0	0	0	0	0	0	0	0	0
AC093590.1	12	tan	0	0	0	0	0	0	0	0	0	0	0	0	0	0	0	0	0	0	0	0	0	0	0	0	0	0	0	0	0	0	0	0	0	0	0	1	0	0	0	0	0
AC093599.1	2	blue	0	1	0	0	0	0	0	0	0	0	0	0	0	0	0	0	0	0	0	0	0	0	0	0	0	0	0	0	0	0	0	0	0	0	0	0	0	0	0	0	0
AC093602.1	29	saddlebrown	0	0	0	0	0	0	0	0	0	0	0	0	0	0	0	0	0	0	0	0	0	0	0	0	0	0	0	0	0	1	0	0	0	0	0	0	0	0	0	0	0
AC093616.1	30	steelblue	0	0	0	0	0	0	0	0	0	0	0	0	0	0	0	0	0	0	0	0	0	0	0	0	0	0	0	0	0	0	0	0	0	0	1	0	0	0	0	0	0
AC093620.5	16	lightcyan	0	0	0	0	0	0	0	0	0	0	0	0	0	0	0	1	0	0	0	0	0	0	0	0	0	0	0	0	0	0	0	0	0	0	0	0	0	0	0	0	0
AC093627.10	23	darkturquoise	0	0	0	0	0	0	0	0	0	0	1	0	0	0	0	0	0	0	0	0	0	0	0	0	0	0	0	0	0	0	0	0	0	0	0	0	0	0	0	0	0
AC093627.9	4	yellow	0	0	0	0	0	0	0	0	0	0	0	0	0	0	0	0	0	0	0	0	0	0	0	0	0	0	0	0	0	0	0	0	0	0	0	0	0	0	0	1	0
AC093628.1	9	magenta	0	0	0	0	0	0	0	0	0	0	0	0	0	0	0	0	0	0	1	0	0	0	0	0	0	0	0	0	0	0	0	0	0	0	0	0	0	0	0	0	0
AC093642.3	17	grey60	0	0	0	0	0	0	0	0	0	0	0	0	0	0	1	0	0	0	0	0	0	0	0	0	0	0	0	0	0	0	0	0	0	0	0	0	0	0	0	0	0
AC093642.5	8	pink	0	0	0	0	0	0	0	0	0	0	0	0	0	0	0	0	0	0	0	0	0	0	0	0	1	0	0	0	0	0	0	0	0	0	0	0	0	0	0	0	0
AC093662.6	8	pink	0	0	0	0	0	0	0	0	0	0	0	0	0	0	0	0	0	0	0	0	0	0	0	0	1	0	0	0	0	0	0	0	0	0	0	0	0	0	0	0	0
AC093673.5	11	greenyellow	0	0	0	0	0	0	0	0	0	0	0	0	1	0	0	0	0	0	0	0	0	0	0	0	0	0	0	0	0	0	0	0	0	0	0	0	0	0	0	0	0
AC093693.1	30	steelblue	0	0	0	0	0	0	0	0	0	0	0	0	0	0	0	0	0	0	0	0	0	0	0	0	0	0	0	0	0	0	0	0	0	0	1	0	0	0	0	0	0
AC093693.2	39	orangered4	0	0	0	0	0	0	0	0	0	0	0	0	0	0	0	0	0	0	0	0	0	0	1	0	0	0	0	0	0	0	0	0	0	0	0	0	0	0	0	0	0
AC093698.3	1	turquoise	0	0	0	0	0	0	0	0	0	0	0	0	0	0	0	0	0	0	0	0	0	0	0	0	0	0	0	0	0	0	0	0	0	0	0	0	1	0	0	0	0
AC093702.1	35	sienna3	0	0	0	0	0	0	0	0	0	0	0	0	0	0	0	0	0	0	0	0	0	0	0	0	0	0	0	0	0	0	0	1	0	0	0	0	0	0	0	0	0
AC093716.1	13	salmon	0	0	0	0	0	0	0	0	0	0	0	0	0	0	0	0	0	0	0	0	0	0	0	0	0	0	0	0	0	0	1	0	0	0	0	0	0	0	0	0	0
AC093724.2	21	darkred	0	0	0	0	0	0	0	0	0	1	0	0	0	0	0	0	0	0	0	0	0	0	0	0	0	0	0	0	0	0	0	0	0	0	0	0	0	0	0	0	0
AC093726.4	2	blue	0	1	0	0	0	0	0	0	0	0	0	0	0	0	0	0	0	0	0	0	0	0	0	0	0	0	0	0	0	0	0	0	0	0	0	0	0	0	0	0	0
AC093726.6	11	greenyellow	0	0	0	0	0	0	0	0	0	0	0	0	1	0	0	0	0	0	0	0	0	0	0	0	0	0	0	0	0	0	0	0	0	0	0	0	0	0	0	0	0
AC093734.1	12	tan	0	0	0	0	0	0	0	0	0	0	0	0	0	0	0	0	0	0	0	0	0	0	0	0	0	0	0	0	0	0	0	0	0	0	0	1	0	0	0	0	0
AC093734.11	2	blue	0	1	0	0	0	0	0	0	0	0	0	0	0	0	0	0	0	0	0	0	0	0	0	0	0	0	0	0	0	0	0	0	0	0	0	0	0	0	0	0	0
AC093787.1	0	grey	0	0	0	0	0	0	0	0	0	0	0	0	0	1	0	0	0	0	0	0	0	0	0	0	0	0	0	0	0	0	0	0	0	0	0	0	0	0	0	0	0
AC093818.1	13	salmon	0	0	0	0	0	0	0	0	0	0	0	0	0	0	0	0	0	0	0	0	0	0	0	0	0	0	0	0	0	0	1	0	0	0	0	0	0	0	0	0	0
AC093838.4	7	black	1	0	0	0	0	0	0	0	0	0	0	0	0	0	0	0	0	0	0	0	0	0	0	0	0	0	0	0	0	0	0	0	0	0	0	0	0	0	0	0	0
AC094019.4	17	grey60	0	0	0	0	0	0	0	0	0	0	0	0	0	0	1	0	0	0	0	0	0	0	0	0	0	0	0	0	0	0	0	0	0	0	0	0	0	0	0	0	0
AC095067.1	3	brown	0	0	1	0	0	0	0	0	0	0	0	0	0	0	0	0	0	0	0	0	0	0	0	0	0	0	0	0	0	0	0	0	0	0	0	0	0	0	0	0	0
AC096574.4	1	turquoise	0	0	0	0	0	0	0	0	0	0	0	0	0	0	0	0	0	0	0	0	0	0	0	0	0	0	0	0	0	0	0	0	0	0	0	0	1	0	0	0	0
AC096574.5	2	blue	0	1	0	0	0	0	0	0	0	0	0	0	0	0	0	0	0	0	0	0	0	0	0	0	0	0	0	0	0	0	0	0	0	0	0	0	0	0	0	0	0
AC096579.1	0	grey	0	0	0	0	0	0	0	0	0	0	0	0	0	1	0	0	0	0	0	0	0	0	0	0	0	0	0	0	0	0	0	0	0	0	0	0	0	0	0	0	0
AC096579.7	40	mediumpurple3	0	0	0	0	0	0	0	0	0	0	0	0	0	0	0	0	0	0	0	1	0	0	0	0	0	0	0	0	0	0	0	0	0	0	0	0	0	0	0	0	0
AC096591.1	5	green	0	0	0	0	0	0	0	0	0	0	0	1	0	0	0	0	0	0	0	0	0	0	0	0	0	0	0	0	0	0	0	0	0	0	0	0	0	0	0	0	0
AC096637.1	5	green	0	0	0	0	0	0	0	0	0	0	0	1	0	0	0	0	0	0	0	0	0	0	0	0	0	0	0	0	0	0	0	0	0	0	0	0	0	0	0	0	0
AC096649.2	5	green	0	0	0	0	0	0	0	0	0	0	0	1	0	0	0	0	0	0	0	0	0	0	0	0	0	0	0	0	0	0	0	0	0	0	0	0	0	0	0	0	0
AC096664.1	10	purple	0	0	0	0	0	0	0	0	0	0	0	0	0	0	0	0	0	0	0	0	0	0	0	0	0	0	1	0	0	0	0	0	0	0	0	0	0	0	0	0	0
AC096669.2	2	blue	0	1	0	0	0	0	0	0	0	0	0	0	0	0	0	0	0	0	0	0	0	0	0	0	0	0	0	0	0	0	0	0	0	0	0	0	0	0	0	0	0
AC096669.3	2	blue	0	1	0	0	0	0	0	0	0	0	0	0	0	0	0	0	0	0	0	0	0	0	0	0	0	0	0	0	0	0	0	0	0	0	0	0	0	0	0	0	0
AC096753.1	8	pink	0	0	0	0	0	0	0	0	0	0	0	0	0	0	0	0	0	0	0	0	0	0	0	0	1	0	0	0	0	0	0	0	0	0	0	0	0	0	0	0	0
AC096772.6	2	blue	0	1	0	0	0	0	0	0	0	0	0	0	0	0	0	0	0	0	0	0	0	0	0	0	0	0	0	0	0	0	0	0	0	0	0	0	0	0	0	0	0
AC097065.1	0	grey	0	0	0	0	0	0	0	0	0	0	0	0	0	1	0	0	0	0	0	0	0	0	0	0	0	0	0	0	0	0	0	0	0	0	0	0	0	0	0	0	0
AC097359.1	13	salmon	0	0	0	0	0	0	0	0	0	0	0	0	0	0	0	0	0	0	0	0	0	0	0	0	0	0	0	0	0	0	1	0	0	0	0	0	0	0	0	0	0
AC097359.2	7	black	1	0	0	0	0	0	0	0	0	0	0	0	0	0	0	0	0	0	0	0	0	0	0	0	0	0	0	0	0	0	0	0	0	0	0	0	0	0	0	0	0
AC097374.5	5	green	0	0	0	0	0	0	0	0	0	0	0	1	0	0	0	0	0	0	0	0	0	0	0	0	0	0	0	0	0	0	0	0	0	0	0	0	0	0	0	0	0
AC097381.1	3	brown	0	0	1	0	0	0	0	0	0	0	0	0	0	0	0	0	0	0	0	0	0	0	0	0	0	0	0	0	0	0	0	0	0	0	0	0	0	0	0	0	0
AC097467.2	19	lightyellow	0	0	0	0	0	0	0	0	0	0	0	0	0	0	0	0	0	1	0	0	0	0	0	0	0	0	0	0	0	0	0	0	0	0	0	0	0	0	0	0	0
AC097468.7	1	turquoise	0	0	0	0	0	0	0	0	0	0	0	0	0	0	0	0	0	0	0	0	0	0	0	0	0	0	0	0	0	0	0	0	0	0	0	0	1	0	0	0	0
AC097499.2	1	turquoise	0	0	0	0	0	0	0	0	0	0	0	0	0	0	0	0	0	0	0	0	0	0	0	0	0	0	0	0	0	0	0	0	0	0	0	0	1	0	0	0	0
AC097500.2	27	white	0	0	0	0	0	0	0	0	0	0	0	0	0	0	0	0	0	0	0	0	0	0	0	0	0	0	0	0	0	0	0	0	0	0	0	0	0	0	1	0	0
AC097523.1	18	lightgreen	0	0	0	0	0	0	0	0	0	0	0	0	0	0	0	0	1	0	0	0	0	0	0	0	0	0	0	0	0	0	0	0	0	0	0	0	0	0	0	0	0
AC097523.2	5	green	0	0	0	0	0	0	0	0	0	0	0	1	0	0	0	0	0	0	0	0	0	0	0	0	0	0	0	0	0	0	0	0	0	0	0	0	0	0	0	0	0
AC097523.3	5	green	0	0	0	0	0	0	0	0	0	0	0	1	0	0	0	0	0	0	0	0	0	0	0	0	0	0	0	0	0	0	0	0	0	0	0	0	0	0	0	0	0
AC097532.1	30	steelblue	0	0	0	0	0	0	0	0	0	0	0	0	0	0	0	0	0	0	0	0	0	0	0	0	0	0	0	0	0	0	0	0	0	0	1	0	0	0	0	0	0
AC097533.1	1	turquoise	0	0	0	0	0	0	0	0	0	0	0	0	0	0	0	0	0	0	0	0	0	0	0	0	0	0	0	0	0	0	0	0	0	0	0	0	1	0	0	0	0
AC097635.4	0	grey	0	0	0	0	0	0	0	0	0	0	0	0	0	1	0	0	0	0	0	0	0	0	0	0	0	0	0	0	0	0	0	0	0	0	0	0	0	0	0	0	0
AC097635.5	18	lightgreen	0	0	0	0	0	0	0	0	0	0	0	0	0	0	0	0	1	0	0	0	0	0	0	0	0	0	0	0	0	0	0	0	0	0	0	0	0	0	0	0	0
AC097639.1	33	darkolivegreen	0	0	0	0	0	0	0	1	0	0	0	0	0	0	0	0	0	0	0	0	0	0	0	0	0	0	0	0	0	0	0	0	0	0	0	0	0	0	0	0	0
AC097658.1	16	lightcyan	0	0	0	0	0	0	0	0	0	0	0	0	0	0	0	1	0	0	0	0	0	0	0	0	0	0	0	0	0	0	0	0	0	0	0	0	0	0	0	0	0
AC097662.2	2	blue	0	1	0	0	0	0	0	0	0	0	0	0	0	0	0	0	0	0	0	0	0	0	0	0	0	0	0	0	0	0	0	0	0	0	0	0	0	0	0	0	0
AC097711.1	4	yellow	0	0	0	0	0	0	0	0	0	0	0	0	0	0	0	0	0	0	0	0	0	0	0	0	0	0	0	0	0	0	0	0	0	0	0	0	0	0	0	1	0
AC097713.3	20	royalblue	0	0	0	0	0	0	0	0	0	0	0	0	0	0	0	0	0	0	0	0	0	0	0	0	0	0	0	0	1	0	0	0	0	0	0	0	0	0	0	0	0
AC098592.6	5	green	0	0	0	0	0	0	0	0	0	0	0	1	0	0	0	0	0	0	0	0	0	0	0	0	0	0	0	0	0	0	0	0	0	0	0	0	0	0	0	0	0
AC098614.2	11	greenyellow	0	0	0	0	0	0	0	0	0	0	0	0	1	0	0	0	0	0	0	0	0	0	0	0	0	0	0	0	0	0	0	0	0	0	0	0	0	0	0	0	0
AC098617.2	3	brown	0	0	1	0	0	0	0	0	0	0	0	0	0	0	0	0	0	0	0	0	0	0	0	0	0	0	0	0	0	0	0	0	0	0	0	0	0	0	0	0	0
AC098691.1	30	steelblue	0	0	0	0	0	0	0	0	0	0	0	0	0	0	0	0	0	0	0	0	0	0	0	0	0	0	0	0	0	0	0	0	0	0	1	0	0	0	0	0	0
AC098789.1	4	yellow	0	0	0	0	0	0	0	0	0	0	0	0	0	0	0	0	0	0	0	0	0	0	0	0	0	0	0	0	0	0	0	0	0	0	0	0	0	0	0	1	0
AC098818.1	3	brown	0	0	1	0	0	0	0	0	0	0	0	0	0	0	0	0	0	0	0	0	0	0	0	0	0	0	0	0	0	0	0	0	0	0	0	0	0	0	0	0	0
AC098820.3	3	brown	0	0	1	0	0	0	0	0	0	0	0	0	0	0	0	0	0	0	0	0	0	0	0	0	0	0	0	0	0	0	0	0	0	0	0	0	0	0	0	0	0
AC098824.5	0	grey	0	0	0	0	0	0	0	0	0	0	0	0	0	1	0	0	0	0	0	0	0	0	0	0	0	0	0	0	0	0	0	0	0	0	0	0	0	0	0	0	0
AC098824.6	8	pink	0	0	0	0	0	0	0	0	0	0	0	0	0	0	0	0	0	0	0	0	0	0	0	0	1	0	0	0	0	0	0	0	0	0	0	0	0	0	0	0	0
AC098826.5	32	violet	0	0	0	0	0	0	0	0	0	0	0	0	0	0	0	0	0	0	0	0	0	0	0	0	0	0	0	0	0	0	0	0	0	0	0	0	0	1	0	0	0
AC098831.4	10	purple	0	0	0	0	0	0	0	0	0	0	0	0	0	0	0	0	0	0	0	0	0	0	0	0	0	0	1	0	0	0	0	0	0	0	0	0	0	0	0	0	0
AC098850.1	8	pink	0	0	0	0	0	0	0	0	0	0	0	0	0	0	0	0	0	0	0	0	0	0	0	0	1	0	0	0	0	0	0	0	0	0	0	0	0	0	0	0	0
AC098850.4	15	midnightblue	0	0	0	0	0	0	0	0	0	0	0	0	0	0	0	0	0	0	0	0	1	0	0	0	0	0	0	0	0	0	0	0	0	0	0	0	0	0	0	0	0
AC099489.1	27	white	0	0	0	0	0	0	0	0	0	0	0	0	0	0	0	0	0	0	0	0	0	0	0	0	0	0	0	0	0	0	0	0	0	0	0	0	0	0	1	0	0
AC099508.1	9	magenta	0	0	0	0	0	0	0	0	0	0	0	0	0	0	0	0	0	0	1	0	0	0	0	0	0	0	0	0	0	0	0	0	0	0	0	0	0	0	0	0	0
AC099522.1	6	red	0	0	0	0	0	0	0	0	0	0	0	0	0	0	0	0	0	0	0	0	0	0	0	0	0	0	0	1	0	0	0	0	0	0	0	0	0	0	0	0	0
AC099535.4	10	purple	0	0	0	0	0	0	0	0	0	0	0	0	0	0	0	0	0	0	0	0	0	0	0	0	0	0	1	0	0	0	0	0	0	0	0	0	0	0	0	0	0
AC099544.2	18	lightgreen	0	0	0	0	0	0	0	0	0	0	0	0	0	0	0	0	1	0	0	0	0	0	0	0	0	0	0	0	0	0	0	0	0	0	0	0	0	0	0	0	0
AC099545.2	11	greenyellow	0	0	0	0	0	0	0	0	0	0	0	0	1	0	0	0	0	0	0	0	0	0	0	0	0	0	0	0	0	0	0	0	0	0	0	0	0	0	0	0	0
AC099668.5	7	black	1	0	0	0	0	0	0	0	0	0	0	0	0	0	0	0	0	0	0	0	0	0	0	0	0	0	0	0	0	0	0	0	0	0	0	0	0	0	0	0	0
AC099681.1	18	lightgreen	0	0	0	0	0	0	0	0	0	0	0	0	0	0	0	0	1	0	0	0	0	0	0	0	0	0	0	0	0	0	0	0	0	0	0	0	0	0	0	0	0
AC099684.1	2	blue	0	1	0	0	0	0	0	0	0	0	0	0	0	0	0	0	0	0	0	0	0	0	0	0	0	0	0	0	0	0	0	0	0	0	0	0	0	0	0	0	0
AC099754.1	3	brown	0	0	1	0	0	0	0	0	0	0	0	0	0	0	0	0	0	0	0	0	0	0	0	0	0	0	0	0	0	0	0	0	0	0	0	0	0	0	0	0	0
AC099778.1	3	brown	0	0	1	0	0	0	0	0	0	0	0	0	0	0	0	0	0	0	0	0	0	0	0	0	0	0	0	0	0	0	0	0	0	0	0	0	0	0	0	0	0
AC099850.1	3	brown	0	0	1	0	0	0	0	0	0	0	0	0	0	0	0	0	0	0	0	0	0	0	0	0	0	0	0	0	0	0	0	0	0	0	0	0	0	0	0	0	0
AC100748.2	6	red	0	0	0	0	0	0	0	0	0	0	0	0	0	0	0	0	0	0	0	0	0	0	0	0	0	0	0	1	0	0	0	0	0	0	0	0	0	0	0	0	0
AC100775.1	1	turquoise	0	0	0	0	0	0	0	0	0	0	0	0	0	0	0	0	0	0	0	0	0	0	0	0	0	0	0	0	0	0	0	0	0	0	0	0	1	0	0	0	0
AC100788.1	1	turquoise	0	0	0	0	0	0	0	0	0	0	0	0	0	0	0	0	0	0	0	0	0	0	0	0	0	0	0	0	0	0	0	0	0	0	0	0	1	0	0	0	0
AC100791.1	1	turquoise	0	0	0	0	0	0	0	0	0	0	0	0	0	0	0	0	0	0	0	0	0	0	0	0	0	0	0	0	0	0	0	0	0	0	0	0	1	0	0	0	0
AC100793.1	9	magenta	0	0	0	0	0	0	0	0	0	0	0	0	0	0	0	0	0	0	1	0	0	0	0	0	0	0	0	0	0	0	0	0	0	0	0	0	0	0	0	0	0
AC100827.1	30	steelblue	0	0	0	0	0	0	0	0	0	0	0	0	0	0	0	0	0	0	0	0	0	0	0	0	0	0	0	0	0	0	0	0	0	0	1	0	0	0	0	0	0
AC100832.1	0	grey	0	0	0	0	0	0	0	0	0	0	0	0	0	1	0	0	0	0	0	0	0	0	0	0	0	0	0	0	0	0	0	0	0	0	0	0	0	0	0	0	0
AC100832.3	0	grey	0	0	0	0	0	0	0	0	0	0	0	0	0	1	0	0	0	0	0	0	0	0	0	0	0	0	0	0	0	0	0	0	0	0	0	0	0	0	0	0	0
AC100852.1	0	grey	0	0	0	0	0	0	0	0	0	0	0	0	0	1	0	0	0	0	0	0	0	0	0	0	0	0	0	0	0	0	0	0	0	0	0	0	0	0	0	0	0
AC100852.3	0	grey	0	0	0	0	0	0	0	0	0	0	0	0	0	1	0	0	0	0	0	0	0	0	0	0	0	0	0	0	0	0	0	0	0	0	0	0	0	0	0	0	0
AC102953.6	29	saddlebrown	0	0	0	0	0	0	0	0	0	0	0	0	0	0	0	0	0	0	0	0	0	0	0	0	0	0	0	0	0	1	0	0	0	0	0	0	0	0	0	0	0
AC103563.8	12	tan	0	0	0	0	0	0	0	0	0	0	0	0	0	0	0	0	0	0	0	0	0	0	0	0	0	0	0	0	0	0	0	0	0	0	0	1	0	0	0	0	0
AC103563.9	12	tan	0	0	0	0	0	0	0	0	0	0	0	0	0	0	0	0	0	0	0	0	0	0	0	0	0	0	0	0	0	0	0	0	0	0	0	1	0	0	0	0	0
AC103564.7	25	orange	0	0	0	0	0	0	0	0	0	0	0	0	0	0	0	0	0	0	0	0	0	1	0	0	0	0	0	0	0	0	0	0	0	0	0	0	0	0	0	0	0
AC103681.1	2	blue	0	1	0	0	0	0	0	0	0	0	0	0	0	0	0	0	0	0	0	0	0	0	0	0	0	0	0	0	0	0	0	0	0	0	0	0	0	0	0	0	0
AC103783.1	22	darkgreen	0	0	0	0	1	0	0	0	0	0	0	0	0	0	0	0	0	0	0	0	0	0	0	0	0	0	0	0	0	0	0	0	0	0	0	0	0	0	0	0	0
AC103801.2	4	yellow	0	0	0	0	0	0	0	0	0	0	0	0	0	0	0	0	0	0	0	0	0	0	0	0	0	0	0	0	0	0	0	0	0	0	0	0	0	0	0	1	0
AC103810.1	7	black	1	0	0	0	0	0	0	0	0	0	0	0	0	0	0	0	0	0	0	0	0	0	0	0	0	0	0	0	0	0	0	0	0	0	0	0	0	0	0	0	0
AC103810.2	7	black	1	0	0	0	0	0	0	0	0	0	0	0	0	0	0	0	0	0	0	0	0	0	0	0	0	0	0	0	0	0	0	0	0	0	0	0	0	0	0	0	0
AC103816.1	0	grey	0	0	0	0	0	0	0	0	0	0	0	0	0	1	0	0	0	0	0	0	0	0	0	0	0	0	0	0	0	0	0	0	0	0	0	0	0	0	0	0	0
AC103817.1	0	grey	0	0	0	0	0	0	0	0	0	0	0	0	0	1	0	0	0	0	0	0	0	0	0	0	0	0	0	0	0	0	0	0	0	0	0	0	0	0	0	0	0
AC103828.1	5	green	0	0	0	0	0	0	0	0	0	0	0	1	0	0	0	0	0	0	0	0	0	0	0	0	0	0	0	0	0	0	0	0	0	0	0	0	0	0	0	0	0
AC103876.1	3	brown	0	0	1	0	0	0	0	0	0	0	0	0	0	0	0	0	0	0	0	0	0	0	0	0	0	0	0	0	0	0	0	0	0	0	0	0	0	0	0	0	0
AC103965.1	1	turquoise	0	0	0	0	0	0	0	0	0	0	0	0	0	0	0	0	0	0	0	0	0	0	0	0	0	0	0	0	0	0	0	0	0	0	0	0	1	0	0	0	0
AC103988.1	3	brown	0	0	1	0	0	0	0	0	0	0	0	0	0	0	0	0	0	0	0	0	0	0	0	0	0	0	0	0	0	0	0	0	0	0	0	0	0	0	0	0	0
AC104088.1	29	saddlebrown	0	0	0	0	0	0	0	0	0	0	0	0	0	0	0	0	0	0	0	0	0	0	0	0	0	0	0	0	0	1	0	0	0	0	0	0	0	0	0	0	0
AC104113.3	5	green	0	0	0	0	0	0	0	0	0	0	0	1	0	0	0	0	0	0	0	0	0	0	0	0	0	0	0	0	0	0	0	0	0	0	0	0	0	0	0	0	0
AC104131.1	8	pink	0	0	0	0	0	0	0	0	0	0	0	0	0	0	0	0	0	0	0	0	0	0	0	0	1	0	0	0	0	0	0	0	0	0	0	0	0	0	0	0	0
AC104134.2	1	turquoise	0	0	0	0	0	0	0	0	0	0	0	0	0	0	0	0	0	0	0	0	0	0	0	0	0	0	0	0	0	0	0	0	0	0	0	0	1	0	0	0	0
AC104135.3	1	turquoise	0	0	0	0	0	0	0	0	0	0	0	0	0	0	0	0	0	0	0	0	0	0	0	0	0	0	0	0	0	0	0	0	0	0	0	0	1	0	0	0	0
AC104183.1	2	blue	0	1	0	0	0	0	0	0	0	0	0	0	0	0	0	0	0	0	0	0	0	0	0	0	0	0	0	0	0	0	0	0	0	0	0	0	0	0	0	0	0
AC104184.1	3	brown	0	0	1	0	0	0	0	0	0	0	0	0	0	0	0	0	0	0	0	0	0	0	0	0	0	0	0	0	0	0	0	0	0	0	0	0	0	0	0	0	0
AC104236.1	0	grey	0	0	0	0	0	0	0	0	0	0	0	0	0	1	0	0	0	0	0	0	0	0	0	0	0	0	0	0	0	0	0	0	0	0	0	0	0	0	0	0	0
AC104297.1	5	green	0	0	0	0	0	0	0	0	0	0	0	1	0	0	0	0	0	0	0	0	0	0	0	0	0	0	0	0	0	0	0	0	0	0	0	0	0	0	0	0	0
AC104306.4	6	red	0	0	0	0	0	0	0	0	0	0	0	0	0	0	0	0	0	0	0	0	0	0	0	0	0	0	0	1	0	0	0	0	0	0	0	0	0	0	0	0	0
AC104306.5	10	purple	0	0	0	0	0	0	0	0	0	0	0	0	0	0	0	0	0	0	0	0	0	0	0	0	0	0	1	0	0	0	0	0	0	0	0	0	0	0	0	0	0
AC104339.1	39	orangered4	0	0	0	0	0	0	0	0	0	0	0	0	0	0	0	0	0	0	0	0	0	0	1	0	0	0	0	0	0	0	0	0	0	0	0	0	0	0	0	0	0
AC104389.31	19	lightyellow	0	0	0	0	0	0	0	0	0	0	0	0	0	0	0	0	0	1	0	0	0	0	0	0	0	0	0	0	0	0	0	0	0	0	0	0	0	0	0	0	0
AC104389.32	10	purple	0	0	0	0	0	0	0	0	0	0	0	0	0	0	0	0	0	0	0	0	0	0	0	0	0	0	1	0	0	0	0	0	0	0	0	0	0	0	0	0	0
AC104395.1	3	brown	0	0	1	0	0	0	0	0	0	0	0	0	0	0	0	0	0	0	0	0	0	0	0	0	0	0	0	0	0	0	0	0	0	0	0	0	0	0	0	0	0
AC104438.1	32	violet	0	0	0	0	0	0	0	0	0	0	0	0	0	0	0	0	0	0	0	0	0	0	0	0	0	0	0	0	0	0	0	0	0	0	0	0	0	1	0	0	0
AC104537.1	25	orange	0	0	0	0	0	0	0	0	0	0	0	0	0	0	0	0	0	0	0	0	0	1	0	0	0	0	0	0	0	0	0	0	0	0	0	0	0	0	0	0	0
AC104641.1	0	grey	0	0	0	0	0	0	0	0	0	0	0	0	0	1	0	0	0	0	0	0	0	0	0	0	0	0	0	0	0	0	0	0	0	0	0	0	0	0	0	0	0
AC104650.2	3	brown	0	0	1	0	0	0	0	0	0	0	0	0	0	0	0	0	0	0	0	0	0	0	0	0	0	0	0	0	0	0	0	0	0	0	0	0	0	0	0	0	0
AC104651.1	6	red	0	0	0	0	0	0	0	0	0	0	0	0	0	0	0	0	0	0	0	0	0	0	0	0	0	0	0	1	0	0	0	0	0	0	0	0	0	0	0	0	0
AC104651.2	5	green	0	0	0	0	0	0	0	0	0	0	0	1	0	0	0	0	0	0	0	0	0	0	0	0	0	0	0	0	0	0	0	0	0	0	0	0	0	0	0	0	0
AC104653.1	25	orange	0	0	0	0	0	0	0	0	0	0	0	0	0	0	0	0	0	0	0	0	0	1	0	0	0	0	0	0	0	0	0	0	0	0	0	0	0	0	0	0	0
AC104655.2	3	brown	0	0	1	0	0	0	0	0	0	0	0	0	0	0	0	0	0	0	0	0	0	0	0	0	0	0	0	0	0	0	0	0	0	0	0	0	0	0	0	0	0
AC104655.3	4	yellow	0	0	0	0	0	0	0	0	0	0	0	0	0	0	0	0	0	0	0	0	0	0	0	0	0	0	0	0	0	0	0	0	0	0	0	0	0	0	0	1	0
AC104698.1	1	turquoise	0	0	0	0	0	0	0	0	0	0	0	0	0	0	0	0	0	0	0	0	0	0	0	0	0	0	0	0	0	0	0	0	0	0	0	0	1	0	0	0	0
AC104699.1	2	blue	0	1	0	0	0	0	0	0	0	0	0	0	0	0	0	0	0	0	0	0	0	0	0	0	0	0	0	0	0	0	0	0	0	0	0	0	0	0	0	0	0
AC104809.2	20	royalblue	0	0	0	0	0	0	0	0	0	0	0	0	0	0	0	0	0	0	0	0	0	0	0	0	0	0	0	0	1	0	0	0	0	0	0	0	0	0	0	0	0
AC104809.3	20	royalblue	0	0	0	0	0	0	0	0	0	0	0	0	0	0	0	0	0	0	0	0	0	0	0	0	0	0	0	0	1	0	0	0	0	0	0	0	0	0	0	0	0
AC104809.4	31	paleturquoise	0	0	0	0	0	0	0	0	0	0	0	0	0	0	0	0	0	0	0	0	0	0	0	1	0	0	0	0	0	0	0	0	0	0	0	0	0	0	0	0	0
AC104843.3	5	green	0	0	0	0	0	0	0	0	0	0	0	1	0	0	0	0	0	0	0	0	0	0	0	0	0	0	0	0	0	0	0	0	0	0	0	0	0	0	0	0	0
AC104942.1	3	brown	0	0	1	0	0	0	0	0	0	0	0	0	0	0	0	0	0	0	0	0	0	0	0	0	0	0	0	0	0	0	0	0	0	0	0	0	0	0	0	0	0
AC104946.2	0	grey	0	0	0	0	0	0	0	0	0	0	0	0	0	1	0	0	0	0	0	0	0	0	0	0	0	0	0	0	0	0	0	0	0	0	0	0	0	0	0	0	0
AC105020.1	3	brown	0	0	1	0	0	0	0	0	0	0	0	0	0	0	0	0	0	0	0	0	0	0	0	0	0	0	0	0	0	0	0	0	0	0	0	0	0	0	0	0	0
AC105036.1	3	brown	0	0	1	0	0	0	0	0	0	0	0	0	0	0	0	0	0	0	0	0	0	0	0	0	0	0	0	0	0	0	0	0	0	0	0	0	0	0	0	0	0
AC105053.4	12	tan	0	0	0	0	0	0	0	0	0	0	0	0	0	0	0	0	0	0	0	0	0	0	0	0	0	0	0	0	0	0	0	0	0	0	0	1	0	0	0	0	0
AC105129.1	1	turquoise	0	0	0	0	0	0	0	0	0	0	0	0	0	0	0	0	0	0	0	0	0	0	0	0	0	0	0	0	0	0	0	0	0	0	0	0	1	0	0	0	0
AC105247.1	3	brown	0	0	1	0	0	0	0	0	0	0	0	0	0	0	0	0	0	0	0	0	0	0	0	0	0	0	0	0	0	0	0	0	0	0	0	0	0	0	0	0	0
AC105287.1	8	pink	0	0	0	0	0	0	0	0	0	0	0	0	0	0	0	0	0	0	0	0	0	0	0	0	1	0	0	0	0	0	0	0	0	0	0	0	0	0	0	0	0
AC105314.1	29	saddlebrown	0	0	0	0	0	0	0	0	0	0	0	0	0	0	0	0	0	0	0	0	0	0	0	0	0	0	0	0	0	1	0	0	0	0	0	0	0	0	0	0	0
AC105393.2	2	blue	0	1	0	0	0	0	0	0	0	0	0	0	0	0	0	0	0	0	0	0	0	0	0	0	0	0	0	0	0	0	0	0	0	0	0	0	0	0	0	0	0
AC105396.3	19	lightyellow	0	0	0	0	0	0	0	0	0	0	0	0	0	0	0	0	0	1	0	0	0	0	0	0	0	0	0	0	0	0	0	0	0	0	0	0	0	0	0	0	0
AC105399.2	10	purple	0	0	0	0	0	0	0	0	0	0	0	0	0	0	0	0	0	0	0	0	0	0	0	0	0	0	1	0	0	0	0	0	0	0	0	0	0	0	0	0	0
AC105402.2	20	royalblue	0	0	0	0	0	0	0	0	0	0	0	0	0	0	0	0	0	0	0	0	0	0	0	0	0	0	0	0	1	0	0	0	0	0	0	0	0	0	0	0	0
AC105402.3	0	grey	0	0	0	0	0	0	0	0	0	0	0	0	0	1	0	0	0	0	0	0	0	0	0	0	0	0	0	0	0	0	0	0	0	0	0	0	0	0	0	0	0
AC105448.1	1	turquoise	0	0	0	0	0	0	0	0	0	0	0	0	0	0	0	0	0	0	0	0	0	0	0	0	0	0	0	0	0	0	0	0	0	0	0	0	1	0	0	0	0
AC105461.1	1	turquoise	0	0	0	0	0	0	0	0	0	0	0	0	0	0	0	0	0	0	0	0	0	0	0	0	0	0	0	0	0	0	0	0	0	0	0	0	1	0	0	0	0
AC105760.2	8	pink	0	0	0	0	0	0	0	0	0	0	0	0	0	0	0	0	0	0	0	0	0	0	0	0	1	0	0	0	0	0	0	0	0	0	0	0	0	0	0	0	0
AC105765.1	4	yellow	0	0	0	0	0	0	0	0	0	0	0	0	0	0	0	0	0	0	0	0	0	0	0	0	0	0	0	0	0	0	0	0	0	0	0	0	0	0	0	1	0
AC105921.1	0	grey	0	0	0	0	0	0	0	0	0	0	0	0	0	1	0	0	0	0	0	0	0	0	0	0	0	0	0	0	0	0	0	0	0	0	0	0	0	0	0	0	0
AC105921.2	0	grey	0	0	0	0	0	0	0	0	0	0	0	0	0	1	0	0	0	0	0	0	0	0	0	0	0	0	0	0	0	0	0	0	0	0	0	0	0	0	0	0	0
AC105921.3	0	grey	0	0	0	0	0	0	0	0	0	0	0	0	0	1	0	0	0	0	0	0	0	0	0	0	0	0	0	0	0	0	0	0	0	0	0	0	0	0	0	0	0
AC105921.5	32	violet	0	0	0	0	0	0	0	0	0	0	0	0	0	0	0	0	0	0	0	0	0	0	0	0	0	0	0	0	0	0	0	0	0	0	0	0	0	1	0	0	0
AC105921.7	0	grey	0	0	0	0	0	0	0	0	0	0	0	0	0	1	0	0	0	0	0	0	0	0	0	0	0	0	0	0	0	0	0	0	0	0	0	0	0	0	0	0	0
AC106722.1	2	blue	0	1	0	0	0	0	0	0	0	0	0	0	0	0	0	0	0	0	0	0	0	0	0	0	0	0	0	0	0	0	0	0	0	0	0	0	0	0	0	0	0
AC106827.1	29	saddlebrown	0	0	0	0	0	0	0	0	0	0	0	0	0	0	0	0	0	0	0	0	0	0	0	0	0	0	0	0	0	1	0	0	0	0	0	0	0	0	0	0	0
AC106864.2	0	grey	0	0	0	0	0	0	0	0	0	0	0	0	0	1	0	0	0	0	0	0	0	0	0	0	0	0	0	0	0	0	0	0	0	0	0	0	0	0	0	0	0
AC106869.2	0	grey	0	0	0	0	0	0	0	0	0	0	0	0	0	1	0	0	0	0	0	0	0	0	0	0	0	0	0	0	0	0	0	0	0	0	0	0	0	0	0	0	0
AC107016.1	33	darkolivegreen	0	0	0	0	0	0	0	1	0	0	0	0	0	0	0	0	0	0	0	0	0	0	0	0	0	0	0	0	0	0	0	0	0	0	0	0	0	0	0	0	0
AC107057.1	6	red	0	0	0	0	0	0	0	0	0	0	0	0	0	0	0	0	0	0	0	0	0	0	0	0	0	0	0	1	0	0	0	0	0	0	0	0	0	0	0	0	0
AC107081.5	5	green	0	0	0	0	0	0	0	0	0	0	0	1	0	0	0	0	0	0	0	0	0	0	0	0	0	0	0	0	0	0	0	0	0	0	0	0	0	0	0	0	0
AC107083.1	0	grey	0	0	0	0	0	0	0	0	0	0	0	0	0	1	0	0	0	0	0	0	0	0	0	0	0	0	0	0	0	0	0	0	0	0	0	0	0	0	0	0	0
AC107613.1	2	blue	0	1	0	0	0	0	0	0	0	0	0	0	0	0	0	0	0	0	0	0	0	0	0	0	0	0	0	0	0	0	0	0	0	0	0	0	0	0	0	0	0
AC107977.1	0	grey	0	0	0	0	0	0	0	0	0	0	0	0	0	1	0	0	0	0	0	0	0	0	0	0	0	0	0	0	0	0	0	0	0	0	0	0	0	0	0	0	0
AC107983.1	15	midnightblue	0	0	0	0	0	0	0	0	0	0	0	0	0	0	0	0	0	0	0	0	1	0	0	0	0	0	0	0	0	0	0	0	0	0	0	0	0	0	0	0	0
AC107983.2	15	midnightblue	0	0	0	0	0	0	0	0	0	0	0	0	0	0	0	0	0	0	0	0	1	0	0	0	0	0	0	0	0	0	0	0	0	0	0	0	0	0	0	0	0
AC107983.4	18	lightgreen	0	0	0	0	0	0	0	0	0	0	0	0	0	0	0	0	1	0	0	0	0	0	0	0	0	0	0	0	0	0	0	0	0	0	0	0	0	0	0	0	0
AC107983.6	11	greenyellow	0	0	0	0	0	0	0	0	0	0	0	0	1	0	0	0	0	0	0	0	0	0	0	0	0	0	0	0	0	0	0	0	0	0	0	0	0	0	0	0	0
AC108004.3	2	blue	0	1	0	0	0	0	0	0	0	0	0	0	0	0	0	0	0	0	0	0	0	0	0	0	0	0	0	0	0	0	0	0	0	0	0	0	0	0	0	0	0
AC108039.2	5	green	0	0	0	0	0	0	0	0	0	0	0	1	0	0	0	0	0	0	0	0	0	0	0	0	0	0	0	0	0	0	0	0	0	0	0	0	0	0	0	0	0
AC108047.1	30	steelblue	0	0	0	0	0	0	0	0	0	0	0	0	0	0	0	0	0	0	0	0	0	0	0	0	0	0	0	0	0	0	0	0	0	0	1	0	0	0	0	0	0
AC108059.1	5	green	0	0	0	0	0	0	0	0	0	0	0	1	0	0	0	0	0	0	0	0	0	0	0	0	0	0	0	0	0	0	0	0	0	0	0	0	0	0	0	0	0
AC108059.2	0	grey	0	0	0	0	0	0	0	0	0	0	0	0	0	1	0	0	0	0	0	0	0	0	0	0	0	0	0	0	0	0	0	0	0	0	0	0	0	0	0	0	0
AC108078.1	30	steelblue	0	0	0	0	0	0	0	0	0	0	0	0	0	0	0	0	0	0	0	0	0	0	0	0	0	0	0	0	0	0	0	0	0	0	1	0	0	0	0	0	0
AC108134.3	7	black	1	0	0	0	0	0	0	0	0	0	0	0	0	0	0	0	0	0	0	0	0	0	0	0	0	0	0	0	0	0	0	0	0	0	0	0	0	0	0	0	0
AC108134.4	9	magenta	0	0	0	0	0	0	0	0	0	0	0	0	0	0	0	0	0	0	1	0	0	0	0	0	0	0	0	0	0	0	0	0	0	0	0	0	0	0	0	0	0
AC108142.1	0	grey	0	0	0	0	0	0	0	0	0	0	0	0	0	1	0	0	0	0	0	0	0	0	0	0	0	0	0	0	0	0	0	0	0	0	0	0	0	0	0	0	0
AC108448.2	9	magenta	0	0	0	0	0	0	0	0	0	0	0	0	0	0	0	0	0	0	1	0	0	0	0	0	0	0	0	0	0	0	0	0	0	0	0	0	0	0	0	0	0
AC108449.2	30	steelblue	0	0	0	0	0	0	0	0	0	0	0	0	0	0	0	0	0	0	0	0	0	0	0	0	0	0	0	0	0	0	0	0	0	0	1	0	0	0	0	0	0
AC108449.3	32	violet	0	0	0	0	0	0	0	0	0	0	0	0	0	0	0	0	0	0	0	0	0	0	0	0	0	0	0	0	0	0	0	0	0	0	0	0	0	1	0	0	0
AC108456.1	0	grey	0	0	0	0	0	0	0	0	0	0	0	0	0	1	0	0	0	0	0	0	0	0	0	0	0	0	0	0	0	0	0	0	0	0	0	0	0	0	0	0	0
AC108463.2	0	grey	0	0	0	0	0	0	0	0	0	0	0	0	0	1	0	0	0	0	0	0	0	0	0	0	0	0	0	0	0	0	0	0	0	0	0	0	0	0	0	0	0
AC108479.2	8	pink	0	0	0	0	0	0	0	0	0	0	0	0	0	0	0	0	0	0	0	0	0	0	0	0	1	0	0	0	0	0	0	0	0	0	0	0	0	0	0	0	0
AC108488.1	36	yellowgreen	0	0	0	0	0	0	0	0	0	0	0	0	0	0	0	0	0	0	0	0	0	0	0	0	0	0	0	0	0	0	0	0	0	0	0	0	0	0	0	0	1
AC108488.3	6	red	0	0	0	0	0	0	0	0	0	0	0	0	0	0	0	0	0	0	0	0	0	0	0	0	0	0	0	1	0	0	0	0	0	0	0	0	0	0	0	0	0
AC108488.4	7	black	1	0	0	0	0	0	0	0	0	0	0	0	0	0	0	0	0	0	0	0	0	0	0	0	0	0	0	0	0	0	0	0	0	0	0	0	0	0	0	0	0
AC108724.1	9	magenta	0	0	0	0	0	0	0	0	0	0	0	0	0	0	0	0	0	0	1	0	0	0	0	0	0	0	0	0	0	0	0	0	0	0	0	0	0	0	0	0	0
AC108868.4	3	brown	0	0	1	0	0	0	0	0	0	0	0	0	0	0	0	0	0	0	0	0	0	0	0	0	0	0	0	0	0	0	0	0	0	0	0	0	0	0	0	0	0
AC109315.1	12	tan	0	0	0	0	0	0	0	0	0	0	0	0	0	0	0	0	0	0	0	0	0	0	0	0	0	0	0	0	0	0	0	0	0	0	0	1	0	0	0	0	0
AC109319.1	3	brown	0	0	1	0	0	0	0	0	0	0	0	0	0	0	0	0	0	0	0	0	0	0	0	0	0	0	0	0	0	0	0	0	0	0	0	0	0	0	0	0	0
AC109326.1	15	midnightblue	0	0	0	0	0	0	0	0	0	0	0	0	0	0	0	0	0	0	0	0	1	0	0	0	0	0	0	0	0	0	0	0	0	0	0	0	0	0	0	0	0
AC109327.1	0	grey	0	0	0	0	0	0	0	0	0	0	0	0	0	1	0	0	0	0	0	0	0	0	0	0	0	0	0	0	0	0	0	0	0	0	0	0	0	0	0	0	0
AC109329.1	18	lightgreen	0	0	0	0	0	0	0	0	0	0	0	0	0	0	0	0	1	0	0	0	0	0	0	0	0	0	0	0	0	0	0	0	0	0	0	0	0	0	0	0	0
AC109333.10	12	tan	0	0	0	0	0	0	0	0	0	0	0	0	0	0	0	0	0	0	0	0	0	0	0	0	0	0	0	0	0	0	0	0	0	0	0	1	0	0	0	0	0
AC109586.1	23	darkturquoise	0	0	0	0	0	0	0	0	0	0	1	0	0	0	0	0	0	0	0	0	0	0	0	0	0	0	0	0	0	0	0	0	0	0	0	0	0	0	0	0	0
AC109631.1	4	yellow	0	0	0	0	0	0	0	0	0	0	0	0	0	0	0	0	0	0	0	0	0	0	0	0	0	0	0	0	0	0	0	0	0	0	0	0	0	0	0	1	0
AC109638.1	6	red	0	0	0	0	0	0	0	0	0	0	0	0	0	0	0	0	0	0	0	0	0	0	0	0	0	0	0	1	0	0	0	0	0	0	0	0	0	0	0	0	0
AC109826.2	3	brown	0	0	1	0	0	0	0	0	0	0	0	0	0	0	0	0	0	0	0	0	0	0	0	0	0	0	0	0	0	0	0	0	0	0	0	0	0	0	0	0	0
AC109828.1	1	turquoise	0	0	0	0	0	0	0	0	0	0	0	0	0	0	0	0	0	0	0	0	0	0	0	0	0	0	0	0	0	0	0	0	0	0	0	0	1	0	0	0	0
AC109829.1	9	magenta	0	0	0	0	0	0	0	0	0	0	0	0	0	0	0	0	0	0	1	0	0	0	0	0	0	0	0	0	0	0	0	0	0	0	0	0	0	0	0	0	0
AC110299.5	1	turquoise	0	0	0	0	0	0	0	0	0	0	0	0	0	0	0	0	0	0	0	0	0	0	0	0	0	0	0	0	0	0	0	0	0	0	0	0	1	0	0	0	0
AC110491.1	12	tan	0	0	0	0	0	0	0	0	0	0	0	0	0	0	0	0	0	0	0	0	0	0	0	0	0	0	0	0	0	0	0	0	0	0	0	1	0	0	0	0	0
AC110602.1	0	grey	0	0	0	0	0	0	0	0	0	0	0	0	0	1	0	0	0	0	0	0	0	0	0	0	0	0	0	0	0	0	0	0	0	0	0	0	0	0	0	0	0
AC110611.1	3	brown	0	0	1	0	0	0	0	0	0	0	0	0	0	0	0	0	0	0	0	0	0	0	0	0	0	0	0	0	0	0	0	0	0	0	0	0	0	0	0	0	0
AC110615.1	30	steelblue	0	0	0	0	0	0	0	0	0	0	0	0	0	0	0	0	0	0	0	0	0	0	0	0	0	0	0	0	0	0	0	0	0	0	1	0	0	0	0	0	0
AC110619.1	1	turquoise	0	0	0	0	0	0	0	0	0	0	0	0	0	0	0	0	0	0	0	0	0	0	0	0	0	0	0	0	0	0	0	0	0	0	0	0	1	0	0	0	0
AC110619.2	1	turquoise	0	0	0	0	0	0	0	0	0	0	0	0	0	0	0	0	0	0	0	0	0	0	0	0	0	0	0	0	0	0	0	0	0	0	0	0	1	0	0	0	0
AC110921.1	7	black	1	0	0	0	0	0	0	0	0	0	0	0	0	0	0	0	0	0	0	0	0	0	0	0	0	0	0	0	0	0	0	0	0	0	0	0	0	0	0	0	0
AC110926.1	7	black	1	0	0	0	0	0	0	0	0	0	0	0	0	0	0	0	0	0	0	0	0	0	0	0	0	0	0	0	0	0	0	0	0	0	0	0	0	0	0	0	0
AC111170.2	7	black	1	0	0	0	0	0	0	0	0	0	0	0	0	0	0	0	0	0	0	0	0	0	0	0	0	0	0	0	0	0	0	0	0	0	0	0	0	0	0	0	0
AC111200.7	0	grey	0	0	0	0	0	0	0	0	0	0	0	0	0	1	0	0	0	0	0	0	0	0	0	0	0	0	0	0	0	0	0	0	0	0	0	0	0	0	0	0	0
AC112211.2	1	turquoise	0	0	0	0	0	0	0	0	0	0	0	0	0	0	0	0	0	0	0	0	0	0	0	0	0	0	0	0	0	0	0	0	0	0	0	0	1	0	0	0	0
AC112211.3	0	grey	0	0	0	0	0	0	0	0	0	0	0	0	0	1	0	0	0	0	0	0	0	0	0	0	0	0	0	0	0	0	0	0	0	0	0	0	0	0	0	0	0
AC112221.1	0	grey	0	0	0	0	0	0	0	0	0	0	0	0	0	1	0	0	0	0	0	0	0	0	0	0	0	0	0	0	0	0	0	0	0	0	0	0	0	0	0	0	0
AC112229.7	15	midnightblue	0	0	0	0	0	0	0	0	0	0	0	0	0	0	0	0	0	0	0	0	1	0	0	0	0	0	0	0	0	0	0	0	0	0	0	0	0	0	0	0	0
AC112502.1	33	darkolivegreen	0	0	0	0	0	0	0	1	0	0	0	0	0	0	0	0	0	0	0	0	0	0	0	0	0	0	0	0	0	0	0	0	0	0	0	0	0	0	0	0	0
AC112777.1	30	steelblue	0	0	0	0	0	0	0	0	0	0	0	0	0	0	0	0	0	0	0	0	0	0	0	0	0	0	0	0	0	0	0	0	0	0	1	0	0	0	0	0	0
AC113189.5	10	purple	0	0	0	0	0	0	0	0	0	0	0	0	0	0	0	0	0	0	0	0	0	0	0	0	0	0	1	0	0	0	0	0	0	0	0	0	0	0	0	0	0
AC113407.1	30	steelblue	0	0	0	0	0	0	0	0	0	0	0	0	0	0	0	0	0	0	0	0	0	0	0	0	0	0	0	0	0	0	0	0	0	0	1	0	0	0	0	0	0
AC113407.2	0	grey	0	0	0	0	0	0	0	0	0	0	0	0	0	1	0	0	0	0	0	0	0	0	0	0	0	0	0	0	0	0	0	0	0	0	0	0	0	0	0	0	0
AC113407.6	0	grey	0	0	0	0	0	0	0	0	0	0	0	0	0	1	0	0	0	0	0	0	0	0	0	0	0	0	0	0	0	0	0	0	0	0	0	0	0	0	0	0	0
AC113407.8	30	steelblue	0	0	0	0	0	0	0	0	0	0	0	0	0	0	0	0	0	0	0	0	0	0	0	0	0	0	0	0	0	0	0	0	0	0	1	0	0	0	0	0	0
AC113607.1	19	lightyellow	0	0	0	0	0	0	0	0	0	0	0	0	0	0	0	0	0	1	0	0	0	0	0	0	0	0	0	0	0	0	0	0	0	0	0	0	0	0	0	0	0
AC113617.1	2	blue	0	1	0	0	0	0	0	0	0	0	0	0	0	0	0	0	0	0	0	0	0	0	0	0	0	0	0	0	0	0	0	0	0	0	0	0	0	0	0	0	0
AC114487.1	0	grey	0	0	0	0	0	0	0	0	0	0	0	0	0	1	0	0	0	0	0	0	0	0	0	0	0	0	0	0	0	0	0	0	0	0	0	0	0	0	0	0	0
AC114489.1	0	grey	0	0	0	0	0	0	0	0	0	0	0	0	0	1	0	0	0	0	0	0	0	0	0	0	0	0	0	0	0	0	0	0	0	0	0	0	0	0	0	0	0
AC114491.1	0	grey	0	0	0	0	0	0	0	0	0	0	0	0	0	1	0	0	0	0	0	0	0	0	0	0	0	0	0	0	0	0	0	0	0	0	0	0	0	0	0	0	0
AC114491.2	30	steelblue	0	0	0	0	0	0	0	0	0	0	0	0	0	0	0	0	0	0	0	0	0	0	0	0	0	0	0	0	0	0	0	0	0	0	1	0	0	0	0	0	0
AC114498.1	3	brown	0	0	1	0	0	0	0	0	0	0	0	0	0	0	0	0	0	0	0	0	0	0	0	0	0	0	0	0	0	0	0	0	0	0	0	0	0	0	0	0	0
AC114498.2	3	brown	0	0	1	0	0	0	0	0	0	0	0	0	0	0	0	0	0	0	0	0	0	0	0	0	0	0	0	0	0	0	0	0	0	0	0	0	0	0	0	0	0
AC114498.3	32	violet	0	0	0	0	0	0	0	0	0	0	0	0	0	0	0	0	0	0	0	0	0	0	0	0	0	0	0	0	0	0	0	0	0	0	0	0	0	1	0	0	0
AC114498.4	30	steelblue	0	0	0	0	0	0	0	0	0	0	0	0	0	0	0	0	0	0	0	0	0	0	0	0	0	0	0	0	0	0	0	0	0	0	1	0	0	0	0	0	0
AC114498.5	3	brown	0	0	1	0	0	0	0	0	0	0	0	0	0	0	0	0	0	0	0	0	0	0	0	0	0	0	0	0	0	0	0	0	0	0	0	0	0	0	0	0	0
AC114498.6	32	violet	0	0	0	0	0	0	0	0	0	0	0	0	0	0	0	0	0	0	0	0	0	0	0	0	0	0	0	0	0	0	0	0	0	0	0	0	0	1	0	0	0
AC114498.7	3	brown	0	0	1	0	0	0	0	0	0	0	0	0	0	0	0	0	0	0	0	0	0	0	0	0	0	0	0	0	0	0	0	0	0	0	0	0	0	0	0	0	0
AC114498.8	32	violet	0	0	0	0	0	0	0	0	0	0	0	0	0	0	0	0	0	0	0	0	0	0	0	0	0	0	0	0	0	0	0	0	0	0	0	0	0	1	0	0	0
AC114546.1	5	green	0	0	0	0	0	0	0	0	0	0	0	1	0	0	0	0	0	0	0	0	0	0	0	0	0	0	0	0	0	0	0	0	0	0	0	0	0	0	0	0	0
AC114689.1	22	darkgreen	0	0	0	0	1	0	0	0	0	0	0	0	0	0	0	0	0	0	0	0	0	0	0	0	0	0	0	0	0	0	0	0	0	0	0	0	0	0	0	0	0
AC114730.11	7	black	1	0	0	0	0	0	0	0	0	0	0	0	0	0	0	0	0	0	0	0	0	0	0	0	0	0	0	0	0	0	0	0	0	0	0	0	0	0	0	0	0
AC114730.2	22	darkgreen	0	0	0	0	1	0	0	0	0	0	0	0	0	0	0	0	0	0	0	0	0	0	0	0	0	0	0	0	0	0	0	0	0	0	0	0	0	0	0	0	0
AC114730.3	3	brown	0	0	1	0	0	0	0	0	0	0	0	0	0	0	0	0	0	0	0	0	0	0	0	0	0	0	0	0	0	0	0	0	0	0	0	0	0	0	0	0	0
AC114730.5	1	turquoise	0	0	0	0	0	0	0	0	0	0	0	0	0	0	0	0	0	0	0	0	0	0	0	0	0	0	0	0	0	0	0	0	0	0	0	0	1	0	0	0	0
AC114730.7	7	black	1	0	0	0	0	0	0	0	0	0	0	0	0	0	0	0	0	0	0	0	0	0	0	0	0	0	0	0	0	0	0	0	0	0	0	0	0	0	0	0	0
AC114730.8	21	darkred	0	0	0	0	0	0	0	0	0	1	0	0	0	0	0	0	0	0	0	0	0	0	0	0	0	0	0	0	0	0	0	0	0	0	0	0	0	0	0	0	0
AC114755.3	2	blue	0	1	0	0	0	0	0	0	0	0	0	0	0	0	0	0	0	0	0	0	0	0	0	0	0	0	0	0	0	0	0	0	0	0	0	0	0	0	0	0	0
AC114770.1	0	grey	0	0	0	0	0	0	0	0	0	0	0	0	0	1	0	0	0	0	0	0	0	0	0	0	0	0	0	0	0	0	0	0	0	0	0	0	0	0	0	0	0
AC114772.1	15	midnightblue	0	0	0	0	0	0	0	0	0	0	0	0	0	0	0	0	0	0	0	0	1	0	0	0	0	0	0	0	0	0	0	0	0	0	0	0	0	0	0	0	0
AC114803.3	2	blue	0	1	0	0	0	0	0	0	0	0	0	0	0	0	0	0	0	0	0	0	0	0	0	0	0	0	0	0	0	0	0	0	0	0	0	0	0	0	0	0	0
AC114810.5	1	turquoise	0	0	0	0	0	0	0	0	0	0	0	0	0	0	0	0	0	0	0	0	0	0	0	0	0	0	0	0	0	0	0	0	0	0	0	0	1	0	0	0	0
AC114877.3	1	turquoise	0	0	0	0	0	0	0	0	0	0	0	0	0	0	0	0	0	0	0	0	0	0	0	0	0	0	0	0	0	0	0	0	0	0	0	0	1	0	0	0	0
AC114947.1	1	turquoise	0	0	0	0	0	0	0	0	0	0	0	0	0	0	0	0	0	0	0	0	0	0	0	0	0	0	0	0	0	0	0	0	0	0	0	0	1	0	0	0	0
AC115088.1	0	grey	0	0	0	0	0	0	0	0	0	0	0	0	0	1	0	0	0	0	0	0	0	0	0	0	0	0	0	0	0	0	0	0	0	0	0	0	0	0	0	0	0
AC115110.1	0	grey	0	0	0	0	0	0	0	0	0	0	0	0	0	1	0	0	0	0	0	0	0	0	0	0	0	0	0	0	0	0	0	0	0	0	0	0	0	0	0	0	0
AC115115.2	1	turquoise	0	0	0	0	0	0	0	0	0	0	0	0	0	0	0	0	0	0	0	0	0	0	0	0	0	0	0	0	0	0	0	0	0	0	0	0	1	0	0	0	0
AC115115.3	29	saddlebrown	0	0	0	0	0	0	0	0	0	0	0	0	0	0	0	0	0	0	0	0	0	0	0	0	0	0	0	0	0	1	0	0	0	0	0	0	0	0	0	0	0
AC115220.5	3	brown	0	0	1	0	0	0	0	0	0	0	0	0	0	0	0	0	0	0	0	0	0	0	0	0	0	0	0	0	0	0	0	0	0	0	0	0	0	0	0	0	0
AC115617.2	16	lightcyan	0	0	0	0	0	0	0	0	0	0	0	0	0	0	0	1	0	0	0	0	0	0	0	0	0	0	0	0	0	0	0	0	0	0	0	0	0	0	0	0	0
AC115618.1	1	turquoise	0	0	0	0	0	0	0	0	0	0	0	0	0	0	0	0	0	0	0	0	0	0	0	0	0	0	0	0	0	0	0	0	0	0	0	0	1	0	0	0	0
AC115989.1	2	blue	0	1	0	0	0	0	0	0	0	0	0	0	0	0	0	0	0	0	0	0	0	0	0	0	0	0	0	0	0	0	0	0	0	0	0	0	0	0	0	0	0
AC116050.1	15	midnightblue	0	0	0	0	0	0	0	0	0	0	0	0	0	0	0	0	0	0	0	0	1	0	0	0	0	0	0	0	0	0	0	0	0	0	0	0	0	0	0	0	0
AC116316.1	30	steelblue	0	0	0	0	0	0	0	0	0	0	0	0	0	0	0	0	0	0	0	0	0	0	0	0	0	0	0	0	0	0	0	0	0	0	1	0	0	0	0	0	0
AC116340.1	30	steelblue	0	0	0	0	0	0	0	0	0	0	0	0	0	0	0	0	0	0	0	0	0	0	0	0	0	0	0	0	0	0	0	0	0	0	1	0	0	0	0	0	0
AC116366.6	7	black	1	0	0	0	0	0	0	0	0	0	0	0	0	0	0	0	0	0	0	0	0	0	0	0	0	0	0	0	0	0	0	0	0	0	0	0	0	0	0	0	0
AC116533.1	0	grey	0	0	0	0	0	0	0	0	0	0	0	0	0	1	0	0	0	0	0	0	0	0	0	0	0	0	0	0	0	0	0	0	0	0	0	0	0	0	0	0	0
AC116562.1	40	mediumpurple3	0	0	0	0	0	0	0	0	0	0	0	0	0	0	0	0	0	0	0	1	0	0	0	0	0	0	0	0	0	0	0	0	0	0	0	0	0	0	0	0	0
AC116562.3	31	paleturquoise	0	0	0	0	0	0	0	0	0	0	0	0	0	0	0	0	0	0	0	0	0	0	0	1	0	0	0	0	0	0	0	0	0	0	0	0	0	0	0	0	0
AC116565.1	19	lightyellow	0	0	0	0	0	0	0	0	0	0	0	0	0	0	0	0	0	1	0	0	0	0	0	0	0	0	0	0	0	0	0	0	0	0	0	0	0	0	0	0	0
AC116609.2	1	turquoise	0	0	0	0	0	0	0	0	0	0	0	0	0	0	0	0	0	0	0	0	0	0	0	0	0	0	0	0	0	0	0	0	0	0	0	0	1	0	0	0	0
AC116609.3	3	brown	0	0	1	0	0	0	0	0	0	0	0	0	0	0	0	0	0	0	0	0	0	0	0	0	0	0	0	0	0	0	0	0	0	0	0	0	0	0	0	0	0
AC116614.1	11	greenyellow	0	0	0	0	0	0	0	0	0	0	0	0	1	0	0	0	0	0	0	0	0	0	0	0	0	0	0	0	0	0	0	0	0	0	0	0	0	0	0	0	0
AC116904.1	5	green	0	0	0	0	0	0	0	0	0	0	0	1	0	0	0	0	0	0	0	0	0	0	0	0	0	0	0	0	0	0	0	0	0	0	0	0	0	0	0	0	0
AC117372.1	1	turquoise	0	0	0	0	0	0	0	0	0	0	0	0	0	0	0	0	0	0	0	0	0	0	0	0	0	0	0	0	0	0	0	0	0	0	0	0	1	0	0	0	0
AC117378.1	37	skyblue3	0	0	0	0	0	0	0	0	0	0	0	0	0	0	0	0	0	0	0	0	0	0	0	0	0	0	0	0	0	0	0	0	0	1	0	0	0	0	0	0	0
AC117401.1	0	grey	0	0	0	0	0	0	0	0	0	0	0	0	0	1	0	0	0	0	0	0	0	0	0	0	0	0	0	0	0	0	0	0	0	0	0	0	0	0	0	0	0
AC117415.1	12	tan	0	0	0	0	0	0	0	0	0	0	0	0	0	0	0	0	0	0	0	0	0	0	0	0	0	0	0	0	0	0	0	0	0	0	0	1	0	0	0	0	0
AC117490.2	0	grey	0	0	0	0	0	0	0	0	0	0	0	0	0	1	0	0	0	0	0	0	0	0	0	0	0	0	0	0	0	0	0	0	0	0	0	0	0	0	0	0	0
AC117517.1	8	pink	0	0	0	0	0	0	0	0	0	0	0	0	0	0	0	0	0	0	0	0	0	0	0	0	1	0	0	0	0	0	0	0	0	0	0	0	0	0	0	0	0
AC117834.1	8	pink	0	0	0	0	0	0	0	0	0	0	0	0	0	0	0	0	0	0	0	0	0	0	0	0	1	0	0	0	0	0	0	0	0	0	0	0	0	0	0	0	0
AC117947.1	14	cyan	0	0	0	1	0	0	0	0	0	0	0	0	0	0	0	0	0	0	0	0	0	0	0	0	0	0	0	0	0	0	0	0	0	0	0	0	0	0	0	0	0
AC118274.1	11	greenyellow	0	0	0	0	0	0	0	0	0	0	0	0	1	0	0	0	0	0	0	0	0	0	0	0	0	0	0	0	0	0	0	0	0	0	0	0	0	0	0	0	0
AC118278.1	1	turquoise	0	0	0	0	0	0	0	0	0	0	0	0	0	0	0	0	0	0	0	0	0	0	0	0	0	0	0	0	0	0	0	0	0	0	0	0	1	0	0	0	0
AC118344.1	7	black	1	0	0	0	0	0	0	0	0	0	0	0	0	0	0	0	0	0	0	0	0	0	0	0	0	0	0	0	0	0	0	0	0	0	0	0	0	0	0	0	0
AC118344.2	7	black	1	0	0	0	0	0	0	0	0	0	0	0	0	0	0	0	0	0	0	0	0	0	0	0	0	0	0	0	0	0	0	0	0	0	0	0	0	0	0	0	0
AC118653.1	24	darkgrey	0	0	0	0	0	1	0	0	0	0	0	0	0	0	0	0	0	0	0	0	0	0	0	0	0	0	0	0	0	0	0	0	0	0	0	0	0	0	0	0	0
AC118754.4	5	green	0	0	0	0	0	0	0	0	0	0	0	1	0	0	0	0	0	0	0	0	0	0	0	0	0	0	0	0	0	0	0	0	0	0	0	0	0	0	0	0	0
AC118759.1	38	plum1	0	0	0	0	0	0	0	0	0	0	0	0	0	0	0	0	0	0	0	0	0	0	0	0	0	1	0	0	0	0	0	0	0	0	0	0	0	0	0	0	0
AC119673.1	8	pink	0	0	0	0	0	0	0	0	0	0	0	0	0	0	0	0	0	0	0	0	0	0	0	0	1	0	0	0	0	0	0	0	0	0	0	0	0	0	0	0	0
AC120114.1	1	turquoise	0	0	0	0	0	0	0	0	0	0	0	0	0	0	0	0	0	0	0	0	0	0	0	0	0	0	0	0	0	0	0	0	0	0	0	0	1	0	0	0	0
AC120114.2	1	turquoise	0	0	0	0	0	0	0	0	0	0	0	0	0	0	0	0	0	0	0	0	0	0	0	0	0	0	0	0	0	0	0	0	0	0	0	0	1	0	0	0	0
AC120114.3	1	turquoise	0	0	0	0	0	0	0	0	0	0	0	0	0	0	0	0	0	0	0	0	0	0	0	0	0	0	0	0	0	0	0	0	0	0	0	0	1	0	0	0	0
AC120194.1	6	red	0	0	0	0	0	0	0	0	0	0	0	0	0	0	0	0	0	0	0	0	0	0	0	0	0	0	0	1	0	0	0	0	0	0	0	0	0	0	0	0	0
AC121247.1	17	grey60	0	0	0	0	0	0	0	0	0	0	0	0	0	0	1	0	0	0	0	0	0	0	0	0	0	0	0	0	0	0	0	0	0	0	0	0	0	0	0	0	0
AC121334.1	1	turquoise	0	0	0	0	0	0	0	0	0	0	0	0	0	0	0	0	0	0	0	0	0	0	0	0	0	0	0	0	0	0	0	0	0	0	0	0	1	0	0	0	0
AC121336.2	2	blue	0	1	0	0	0	0	0	0	0	0	0	0	0	0	0	0	0	0	0	0	0	0	0	0	0	0	0	0	0	0	0	0	0	0	0	0	0	0	0	0	0
AC121344.1	0	grey	0	0	0	0	0	0	0	0	0	0	0	0	0	1	0	0	0	0	0	0	0	0	0	0	0	0	0	0	0	0	0	0	0	0	0	0	0	0	0	0	0
AC122129.1	15	midnightblue	0	0	0	0	0	0	0	0	0	0	0	0	0	0	0	0	0	0	0	0	1	0	0	0	0	0	0	0	0	0	0	0	0	0	0	0	0	0	0	0	0
AC122129.3	7	black	1	0	0	0	0	0	0	0	0	0	0	0	0	0	0	0	0	0	0	0	0	0	0	0	0	0	0	0	0	0	0	0	0	0	0	0	0	0	0	0	0
AC122179.1	1	turquoise	0	0	0	0	0	0	0	0	0	0	0	0	0	0	0	0	0	0	0	0	0	0	0	0	0	0	0	0	0	0	0	0	0	0	0	0	1	0	0	0	0
AC123023.1	0	grey	0	0	0	0	0	0	0	0	0	0	0	0	0	1	0	0	0	0	0	0	0	0	0	0	0	0	0	0	0	0	0	0	0	0	0	0	0	0	0	0	0
AC123768.6	3	brown	0	0	1	0	0	0	0	0	0	0	0	0	0	0	0	0	0	0	0	0	0	0	0	0	0	0	0	0	0	0	0	0	0	0	0	0	0	0	0	0	0
AC123912.1	11	greenyellow	0	0	0	0	0	0	0	0	0	0	0	0	1	0	0	0	0	0	0	0	0	0	0	0	0	0	0	0	0	0	0	0	0	0	0	0	0	0	0	0	0
AC124057.5	0	grey	0	0	0	0	0	0	0	0	0	0	0	0	0	1	0	0	0	0	0	0	0	0	0	0	0	0	0	0	0	0	0	0	0	0	0	0	0	0	0	0	0
AC124066.1	3	brown	0	0	1	0	0	0	0	0	0	0	0	0	0	0	0	0	0	0	0	0	0	0	0	0	0	0	0	0	0	0	0	0	0	0	0	0	0	0	0	0	0
AC124309.1	28	skyblue	0	0	0	0	0	0	0	0	0	0	0	0	0	0	0	0	0	0	0	0	0	0	0	0	0	0	0	0	0	0	0	0	1	0	0	0	0	0	0	0	0
AC124789.1	3	brown	0	0	1	0	0	0	0	0	0	0	0	0	0	0	0	0	0	0	0	0	0	0	0	0	0	0	0	0	0	0	0	0	0	0	0	0	0	0	0	0	0
AC124890.1	7	black	1	0	0	0	0	0	0	0	0	0	0	0	0	0	0	0	0	0	0	0	0	0	0	0	0	0	0	0	0	0	0	0	0	0	0	0	0	0	0	0	0
AC124914.3	0	grey	0	0	0	0	0	0	0	0	0	0	0	0	0	1	0	0	0	0	0	0	0	0	0	0	0	0	0	0	0	0	0	0	0	0	0	0	0	0	0	0	0
AC124944.2	5	green	0	0	0	0	0	0	0	0	0	0	0	1	0	0	0	0	0	0	0	0	0	0	0	0	0	0	0	0	0	0	0	0	0	0	0	0	0	0	0	0	0
AC124944.3	15	midnightblue	0	0	0	0	0	0	0	0	0	0	0	0	0	0	0	0	0	0	0	0	1	0	0	0	0	0	0	0	0	0	0	0	0	0	0	0	0	0	0	0	0
AC125232.1	1	turquoise	0	0	0	0	0	0	0	0	0	0	0	0	0	0	0	0	0	0	0	0	0	0	0	0	0	0	0	0	0	0	0	0	0	0	0	0	1	0	0	0	0
AC125238.1	0	grey	0	0	0	0	0	0	0	0	0	0	0	0	0	1	0	0	0	0	0	0	0	0	0	0	0	0	0	0	0	0	0	0	0	0	0	0	0	0	0	0	0
AC125238.2	4	yellow	0	0	0	0	0	0	0	0	0	0	0	0	0	0	0	0	0	0	0	0	0	0	0	0	0	0	0	0	0	0	0	0	0	0	0	0	0	0	0	1	0
AC125494.1	1	turquoise	0	0	0	0	0	0	0	0	0	0	0	0	0	0	0	0	0	0	0	0	0	0	0	0	0	0	0	0	0	0	0	0	0	0	0	0	1	0	0	0	0
AC126118.1	0	grey	0	0	0	0	0	0	0	0	0	0	0	0	0	1	0	0	0	0	0	0	0	0	0	0	0	0	0	0	0	0	0	0	0	0	0	0	0	0	0	0	0
AC126327.1	11	greenyellow	0	0	0	0	0	0	0	0	0	0	0	0	1	0	0	0	0	0	0	0	0	0	0	0	0	0	0	0	0	0	0	0	0	0	0	0	0	0	0	0	0
AC126365.4	5	green	0	0	0	0	0	0	0	0	0	0	0	1	0	0	0	0	0	0	0	0	0	0	0	0	0	0	0	0	0	0	0	0	0	0	0	0	0	0	0	0	0
AC126365.7	0	grey	0	0	0	0	0	0	0	0	0	0	0	0	0	1	0	0	0	0	0	0	0	0	0	0	0	0	0	0	0	0	0	0	0	0	0	0	0	0	0	0	0
AC126544.1	1	turquoise	0	0	0	0	0	0	0	0	0	0	0	0	0	0	0	0	0	0	0	0	0	0	0	0	0	0	0	0	0	0	0	0	0	0	0	0	1	0	0	0	0
AC126544.2	1	turquoise	0	0	0	0	0	0	0	0	0	0	0	0	0	0	0	0	0	0	0	0	0	0	0	0	0	0	0	0	0	0	0	0	0	0	0	0	1	0	0	0	0
AC126775.1	1	turquoise	0	0	0	0	0	0	0	0	0	0	0	0	0	0	0	0	0	0	0	0	0	0	0	0	0	0	0	0	0	0	0	0	0	0	0	0	1	0	0	0	0
AC127496.1	9	magenta	0	0	0	0	0	0	0	0	0	0	0	0	0	0	0	0	0	0	1	0	0	0	0	0	0	0	0	0	0	0	0	0	0	0	0	0	0	0	0	0	0
AC127496.2	9	magenta	0	0	0	0	0	0	0	0	0	0	0	0	0	0	0	0	0	0	1	0	0	0	0	0	0	0	0	0	0	0	0	0	0	0	0	0	0	0	0	0	0
AC127496.3	1	turquoise	0	0	0	0	0	0	0	0	0	0	0	0	0	0	0	0	0	0	0	0	0	0	0	0	0	0	0	0	0	0	0	0	0	0	0	0	1	0	0	0	0
AC127496.4	8	pink	0	0	0	0	0	0	0	0	0	0	0	0	0	0	0	0	0	0	0	0	0	0	0	0	1	0	0	0	0	0	0	0	0	0	0	0	0	0	0	0	0
AC127904.2	32	violet	0	0	0	0	0	0	0	0	0	0	0	0	0	0	0	0	0	0	0	0	0	0	0	0	0	0	0	0	0	0	0	0	0	0	0	0	0	1	0	0	0
AC128709.1	2	blue	0	1	0	0	0	0	0	0	0	0	0	0	0	0	0	0	0	0	0	0	0	0	0	0	0	0	0	0	0	0	0	0	0	0	0	0	0	0	0	0	0
AC128709.2	28	skyblue	0	0	0	0	0	0	0	0	0	0	0	0	0	0	0	0	0	0	0	0	0	0	0	0	0	0	0	0	0	0	0	0	1	0	0	0	0	0	0	0	0
AC128709.3	25	orange	0	0	0	0	0	0	0	0	0	0	0	0	0	0	0	0	0	0	0	0	0	1	0	0	0	0	0	0	0	0	0	0	0	0	0	0	0	0	0	0	0
AC129492.6	28	skyblue	0	0	0	0	0	0	0	0	0	0	0	0	0	0	0	0	0	0	0	0	0	0	0	0	0	0	0	0	0	0	0	0	1	0	0	0	0	0	0	0	0
AC129929.5	3	brown	0	0	1	0	0	0	0	0	0	0	0	0	0	0	0	0	0	0	0	0	0	0	0	0	0	0	0	0	0	0	0	0	0	0	0	0	0	0	0	0	0
AC130343.1	5	green	0	0	0	0	0	0	0	0	0	0	0	1	0	0	0	0	0	0	0	0	0	0	0	0	0	0	0	0	0	0	0	0	0	0	0	0	0	0	0	0	0
AC130352.1	1	turquoise	0	0	0	0	0	0	0	0	0	0	0	0	0	0	0	0	0	0	0	0	0	0	0	0	0	0	0	0	0	0	0	0	0	0	0	0	1	0	0	0	0
AC130454.2	3	brown	0	0	1	0	0	0	0	0	0	0	0	0	0	0	0	0	0	0	0	0	0	0	0	0	0	0	0	0	0	0	0	0	0	0	0	0	0	0	0	0	0
AC130456.1	0	grey	0	0	0	0	0	0	0	0	0	0	0	0	0	1	0	0	0	0	0	0	0	0	0	0	0	0	0	0	0	0	0	0	0	0	0	0	0	0	0	0	0
AC131055.10	3	brown	0	0	1	0	0	0	0	0	0	0	0	0	0	0	0	0	0	0	0	0	0	0	0	0	0	0	0	0	0	0	0	0	0	0	0	0	0	0	0	0	0
AC131055.2	3	brown	0	0	1	0	0	0	0	0	0	0	0	0	0	0	0	0	0	0	0	0	0	0	0	0	0	0	0	0	0	0	0	0	0	0	0	0	0	0	0	0	0
AC131055.6	12	tan	0	0	0	0	0	0	0	0	0	0	0	0	0	0	0	0	0	0	0	0	0	0	0	0	0	0	0	0	0	0	0	0	0	0	0	1	0	0	0	0	0
AC131055.8	3	brown	0	0	1	0	0	0	0	0	0	0	0	0	0	0	0	0	0	0	0	0	0	0	0	0	0	0	0	0	0	0	0	0	0	0	0	0	0	0	0	0	0
AC131097.3	17	grey60	0	0	0	0	0	0	0	0	0	0	0	0	0	0	1	0	0	0	0	0	0	0	0	0	0	0	0	0	0	0	0	0	0	0	0	0	0	0	0	0	0
AC131097.4	3	brown	0	0	1	0	0	0	0	0	0	0	0	0	0	0	0	0	0	0	0	0	0	0	0	0	0	0	0	0	0	0	0	0	0	0	0	0	0	0	0	0	0
AC131157.1	0	grey	0	0	0	0	0	0	0	0	0	0	0	0	0	1	0	0	0	0	0	0	0	0	0	0	0	0	0	0	0	0	0	0	0	0	0	0	0	0	0	0	0
AC131160.1	7	black	1	0	0	0	0	0	0	0	0	0	0	0	0	0	0	0	0	0	0	0	0	0	0	0	0	0	0	0	0	0	0	0	0	0	0	0	0	0	0	0	0
AC131571.1	0	grey	0	0	0	0	0	0	0	0	0	0	0	0	0	1	0	0	0	0	0	0	0	0	0	0	0	0	0	0	0	0	0	0	0	0	0	0	0	0	0	0	0
AC131971.3	9	magenta	0	0	0	0	0	0	0	0	0	0	0	0	0	0	0	0	0	0	1	0	0	0	0	0	0	0	0	0	0	0	0	0	0	0	0	0	0	0	0	0	0
AC132008.1	15	midnightblue	0	0	0	0	0	0	0	0	0	0	0	0	0	0	0	0	0	0	0	0	1	0	0	0	0	0	0	0	0	0	0	0	0	0	0	0	0	0	0	0	0
AC132186.1	12	tan	0	0	0	0	0	0	0	0	0	0	0	0	0	0	0	0	0	0	0	0	0	0	0	0	0	0	0	0	0	0	0	0	0	0	0	1	0	0	0	0	0
AC132217.4	13	salmon	0	0	0	0	0	0	0	0	0	0	0	0	0	0	0	0	0	0	0	0	0	0	0	0	0	0	0	0	0	0	1	0	0	0	0	0	0	0	0	0	0
AC132515.1	0	grey	0	0	0	0	0	0	0	0	0	0	0	0	0	1	0	0	0	0	0	0	0	0	0	0	0	0	0	0	0	0	0	0	0	0	0	0	0	0	0	0	0
AC132872.1	9	magenta	0	0	0	0	0	0	0	0	0	0	0	0	0	0	0	0	0	0	1	0	0	0	0	0	0	0	0	0	0	0	0	0	0	0	0	0	0	0	0	0	0
AC132872.3	21	darkred	0	0	0	0	0	0	0	0	0	1	0	0	0	0	0	0	0	0	0	0	0	0	0	0	0	0	0	0	0	0	0	0	0	0	0	0	0	0	0	0	0
AC132872.4	8	pink	0	0	0	0	0	0	0	0	0	0	0	0	0	0	0	0	0	0	0	0	0	0	0	0	1	0	0	0	0	0	0	0	0	0	0	0	0	0	0	0	0
AC133528.2	8	pink	0	0	0	0	0	0	0	0	0	0	0	0	0	0	0	0	0	0	0	0	0	0	0	0	1	0	0	0	0	0	0	0	0	0	0	0	0	0	0	0	0
AC133552.1	15	midnightblue	0	0	0	0	0	0	0	0	0	0	0	0	0	0	0	0	0	0	0	0	1	0	0	0	0	0	0	0	0	0	0	0	0	0	0	0	0	0	0	0	0
AC133633.2	3	brown	0	0	1	0	0	0	0	0	0	0	0	0	0	0	0	0	0	0	0	0	0	0	0	0	0	0	0	0	0	0	0	0	0	0	0	0	0	0	0	0	0
AC133644.3	19	lightyellow	0	0	0	0	0	0	0	0	0	0	0	0	0	0	0	0	0	1	0	0	0	0	0	0	0	0	0	0	0	0	0	0	0	0	0	0	0	0	0	0	0
AC133680.1	28	skyblue	0	0	0	0	0	0	0	0	0	0	0	0	0	0	0	0	0	0	0	0	0	0	0	0	0	0	0	0	0	0	0	0	1	0	0	0	0	0	0	0	0
AC133919.1	18	lightgreen	0	0	0	0	0	0	0	0	0	0	0	0	0	0	0	0	1	0	0	0	0	0	0	0	0	0	0	0	0	0	0	0	0	0	0	0	0	0	0	0	0
AC133919.6	7	black	1	0	0	0	0	0	0	0	0	0	0	0	0	0	0	0	0	0	0	0	0	0	0	0	0	0	0	0	0	0	0	0	0	0	0	0	0	0	0	0	0
AC134312.1	2	blue	0	1	0	0	0	0	0	0	0	0	0	0	0	0	0	0	0	0	0	0	0	0	0	0	0	0	0	0	0	0	0	0	0	0	0	0	0	0	0	0	0
AC134873.1	0	grey	0	0	0	0	0	0	0	0	0	0	0	0	0	1	0	0	0	0	0	0	0	0	0	0	0	0	0	0	0	0	0	0	0	0	0	0	0	0	0	0	0
AC134943.1	1	turquoise	0	0	0	0	0	0	0	0	0	0	0	0	0	0	0	0	0	0	0	0	0	0	0	0	0	0	0	0	0	0	0	0	0	0	0	0	1	0	0	0	0
AC135050.1	9	magenta	0	0	0	0	0	0	0	0	0	0	0	0	0	0	0	0	0	0	1	0	0	0	0	0	0	0	0	0	0	0	0	0	0	0	0	0	0	0	0	0	0
AC135050.2	5	green	0	0	0	0	0	0	0	0	0	0	0	1	0	0	0	0	0	0	0	0	0	0	0	0	0	0	0	0	0	0	0	0	0	0	0	0	0	0	0	0	0
AC135050.3	9	magenta	0	0	0	0	0	0	0	0	0	0	0	0	0	0	0	0	0	0	1	0	0	0	0	0	0	0	0	0	0	0	0	0	0	0	0	0	0	0	0	0	0
AC135178.1	17	grey60	0	0	0	0	0	0	0	0	0	0	0	0	0	0	1	0	0	0	0	0	0	0	0	0	0	0	0	0	0	0	0	0	0	0	0	0	0	0	0	0	0
AC135178.7	3	brown	0	0	1	0	0	0	0	0	0	0	0	0	0	0	0	0	0	0	0	0	0	0	0	0	0	0	0	0	0	0	0	0	0	0	0	0	0	0	0	0	0
AC135352.1	11	greenyellow	0	0	0	0	0	0	0	0	0	0	0	0	1	0	0	0	0	0	0	0	0	0	0	0	0	0	0	0	0	0	0	0	0	0	0	0	0	0	0	0	0
AC135506.1	7	black	1	0	0	0	0	0	0	0	0	0	0	0	0	0	0	0	0	0	0	0	0	0	0	0	0	0	0	0	0	0	0	0	0	0	0	0	0	0	0	0	0
AC135724.1	7	black	1	0	0	0	0	0	0	0	0	0	0	0	0	0	0	0	0	0	0	0	0	0	0	0	0	0	0	0	0	0	0	0	0	0	0	0	0	0	0	0	0
AC135782.1	11	greenyellow	0	0	0	0	0	0	0	0	0	0	0	0	1	0	0	0	0	0	0	0	0	0	0	0	0	0	0	0	0	0	0	0	0	0	0	0	0	0	0	0	0
AC136704.2	17	grey60	0	0	0	0	0	0	0	0	0	0	0	0	0	0	1	0	0	0	0	0	0	0	0	0	0	0	0	0	0	0	0	0	0	0	0	0	0	0	0	0	0
AC137630.1	0	grey	0	0	0	0	0	0	0	0	0	0	0	0	0	1	0	0	0	0	0	0	0	0	0	0	0	0	0	0	0	0	0	0	0	0	0	0	0	0	0	0	0
AC137723.5	2	blue	0	1	0	0	0	0	0	0	0	0	0	0	0	0	0	0	0	0	0	0	0	0	0	0	0	0	0	0	0	0	0	0	0	0	0	0	0	0	0	0	0
AC137932.1	0	grey	0	0	0	0	0	0	0	0	0	0	0	0	0	1	0	0	0	0	0	0	0	0	0	0	0	0	0	0	0	0	0	0	0	0	0	0	0	0	0	0	0
[truncated: 24,599 more rows]

## Sheet: 41 Module Eigengene expression
	MEpaleturquoise	MEroyalblue	MEsienna3	MEdarkmagenta	MEsalmon	MElightcyan	MEyellowgreen	MEorangered4	MEsteelblue	MEviolet	MEbrown	MEtan	MEsaddlebrown	MEgreenyellow	MEskyblue3	MEblack	MEmidnightblue	MEmediumpurple3	MEdarkgrey	MEcyan	MEred	MEorange	MEskyblue	MEwhite	MEdarkturquoise	MEdarkolivegreen	MEplum1	MEpink	MEblue	MElightyellow	MEdarkorange	MEdarkred	MEmagenta	MElightgreen	MEyellow	MEgreen	MEpurple	MEdarkgreen	MEgrey60	MEturquoise	MEgrey
M_8pcw_Ocx	0.00140902	-0.014183	0.0640368	-0.0337456	0.00909728	0.113444	-0.0583257	-0.0112079	-0.0169916	-0.0179003	-0.0188846	-0.0340441	-0.014388	-0.0152614	-0.0195967	-0.0333623	-0.0438111	-0.01544	0.0819267	-0.0213967	0.0295519	-0.0228578	-0.0102639	-0.00682132	-0.0256561	-0.00806215	-0.016928	0.0331882	-0.0486365	-0.0547246	-0.0619244	-0.0482358	0.00650105	0.0345365	0.209959	0.0909573	0.0870999	-0.00802506	-0.0141224	0.0613595	-0.0471147
M_8pcw_M1C.S1C	-0.00244652	-0.0134548	0.0413882	-0.035593	0.00213658	0.0978738	-0.0471457	0.00150387	-0.00851593	-0.0150292	-0.0243427	-0.0310978	-0.0126907	-0.0133673	-0.0142393	-0.00748107	-0.0291585	-0.0179223	0.0120151	-0.0460646	-0.0123478	-0.0218007	-0.0115634	-0.0051435	-0.0250135	-0.01188	-0.0203768	0.0253181	-0.0468932	-0.0298039	-0.0547645	-0.0231489	0.0132249	0.0574312	0.164874	0.0564804	0.0271649	0.0128455	0.0435305	0.0878511	-0.0266609
M_8pcw_AMY	-0.0026572	-0.00656897	0.0276566	-0.0386989	-0.00278219	0.0340287	-0.0257684	8.95657e-05	-0.0109061	-0.019444	-0.0335703	-0.035344	-0.0119508	-0.0162991	-0.0179515	-0.0395939	-0.0441995	-0.00960412	0.0460764	-0.027065	0.00285066	-0.0105193	0.107148	0.00742807	-0.0217476	0.0128655	-0.000218921	0.0217687	-0.0420875	-0.0302251	-0.0202152	-0.0150881	0.0286907	0.128355	0.092846	0.062899	0.0684857	-0.0133622	-0.0112016	0.0524512	-0.0380485
M_8pcw_MGE	-0.00553796	-0.0100146	0.00967389	-0.0358829	-0.00229511	0.0943105	-0.0456668	-0.00648874	-0.0161795	-0.0191348	-0.0253313	-0.0313917	-0.0150804	-0.0174155	-0.016458	-0.0319336	-0.0414429	-0.0166387	0.0416127	-0.0364772	0.00796943	-0.0168506	0.0940852	0.00216244	-0.0244404	0.00183128	-0.00693696	0.0239467	-0.0487558	-0.0486065	-0.0441873	-0.0368545	0.0141398	0.0283754	0.174109	0.0704312	0.0552187	-0.0212476	-0.00191975	0.0664482	-0.0335201
M_8pcw_STC	0.00957512	-0.0164763	0.193045	-0.000974033	0.0251678	0.0616317	-0.0219696	-0.0103658	-0.01804	-0.0172454	-0.0221763	-0.0316402	-0.0127802	-0.0127857	-0.0168584	-0.0351703	-0.040415	-0.015651	0.0215838	-0.0379228	-0.00920928	-0.0177236	0.00244094	-0.000844531	-0.0184759	-0.00536239	-0.0124202	0.0269645	-0.0439921	-0.0249663	-0.0320579	-0.01401	0.0232638	0.0296012	0.101611	0.0580807	0.034948	0.0194269	-0.000448384	0.0635154	-0.0396901
M_8pcw_URL	3.91701e-05	-0.00291089	0.0267687	0.00577017	-0.000909227	0.0183072	0.0177991	0.00358082	0.00274233	-0.0171068	-0.0317605	-0.0318818	-0.00822031	0.00206171	-0.0128761	0.00445284	-0.0295381	-0.0162153	0.0289199	-0.0188716	-0.0233564	-0.00852961	0.0358671	0.284074	-0.00539857	0.0662438	0.0879741	-0.0130784	-0.0337336	-0.021754	-0.00547626	0.052894	0.0764708	0.000290659	0.0348164	0.0222317	0.0117458	-0.0145414	0.0347531	0.0513409	-0.0232652
M_8pcw_CGE	-0.0101177	-0.0108953	-0.010609	-0.0442142	-0.00708762	0.0997997	-0.0421378	-0.00648191	-0.012524	-0.0191649	-0.0267461	-0.0320288	-0.0162588	-0.0188391	-0.0177015	-0.0332864	-0.0427319	-0.0159963	0.0337298	-0.0403741	-0.0026788	-0.0195177	0.0260767	-0.00548003	-0.02781	-0.00602798	-0.0174396	0.0215505	-0.0508458	-0.0455487	-0.0523618	-0.0338421	0.0154827	0.0265203	0.178409	0.065857	0.0453051	-0.0143577	-0.00322082	0.0724049	-0.0391855
M_8pcw_DTH	-0.00164054	-0.0159909	-0.014491	-0.0514418	-0.0130229	0.0285959	-0.0458958	-0.00868348	0.00364759	-0.0198945	-0.0369159	-0.037033	-0.0133416	-0.0121851	-0.0238186	-0.0429333	-0.0469241	-0.0175841	0.0368166	-0.0326124	-0.000792717	-0.0216756	0.00807321	0.026716	-0.0187148	0.254683	0.0143844	0.0106269	-0.0487415	-0.0494805	-0.0326386	-0.0244683	0.0313568	0.00108638	0.100916	0.0653562	0.0277175	-0.0208308	-0.0213538	0.0373355	-0.0372801
M_8pcw_MFC	7.59223e-05	-0.00707147	0.0387296	-0.0380188	0.00315729	0.117099	-0.0630754	0.0153215	0.0112843	-0.018425	-0.0183253	-0.0339221	-0.0146372	-0.0160549	-0.0188168	-0.0350744	-0.045512	-0.0143433	0.0745799	-0.0265935	0.0298355	-0.0188515	-0.00881818	0.00795841	-0.0253301	-0.000851519	-0.0156839	0.0250537	-0.050514	-0.0566014	-0.0588456	-0.0547326	0.00395804	0.0526736	0.212876	0.0881217	0.0752992	-0.0130085	-0.0176768	0.0507013	-0.0342103
M_8pcw_DFC	-0.00145684	-0.0128409	0.0614918	-0.0296434	0.00966043	0.0989022	-0.0670406	-0.00277419	0.00181864	-0.0197895	-0.0160713	-0.0360282	-0.0108539	-0.0166906	-0.0156129	-0.0375937	-0.0461511	-0.00910491	0.108305	-0.0130859	0.0571918	-0.0222036	-0.0135743	-0.00359293	-0.0269957	-0.0099843	-0.0195516	0.0224652	-0.0513458	-0.0655439	-0.0611051	-0.0596954	0.00493766	0.139754	0.196629	0.103863	0.112893	-0.0108532	-0.026526	0.0347448	-0.0404269
M_8pcw_OFC	0.0427759	0.00396271	0.790943	0.0206249	0.0849195	0.121437	-0.0435893	-0.00296765	0.00834902	-0.0156694	0.00757091	-0.022879	-0.0124377	-0.00123892	-0.0170225	-0.0351041	-0.0428294	-0.00736275	0.0942112	-0.0115046	0.050814	-0.00879832	0.00761166	0.0348203	-0.00232768	0.0313217	0.0107024	0.0183683	-0.0446509	-0.0613549	-0.0329695	-0.0593907	0.00456417	0.0506687	0.146941	0.0843701	0.090806	-0.0130023	-0.0289318	0.0237724	-0.0341115
M_8pcw_LGE	-0.00929658	-0.00610133	-0.00750031	-0.0477161	-0.0112246	0.076514	-0.0384603	-0.00816713	-0.0132913	-0.0190611	-0.0305282	-0.031857	-0.0131403	-0.0137855	-0.0125177	-0.0131274	-0.0320632	-0.013608	0.0144985	-0.0409696	-0.0107475	-0.0131333	0.102572	0.00312585	-0.0232033	0.00644341	-0.00771315	0.0183253	-0.0458822	-0.0320997	-0.0370998	-0.011737	0.0265032	-0.00478885	0.1439	0.0534803	0.0199837	-0.0143097	0.0330411	0.0756014	-0.0283881
M_8pcw_ITC	-0.00595797	-0.0111656	0.0154401	-0.0370893	-0.00851442	0.0389447	-0.0232341	-0.00852156	-0.012828	-0.0229927	-0.0358906	-0.0349611	-0.0142092	-0.0138299	-0.0182878	-0.0403849	-0.0427297	-0.0146159	0.0203399	-0.0358811	-0.00383344	-0.0148889	0.0430178	0.00969702	-0.019101	0.0175904	-0.00169936	0.0414137	-0.040518	-0.0218042	-0.0129698	-0.0190171	0.020166	0.0152922	0.0911554	0.067522	0.0335854	-0.00166289	-0.00776177	0.0556487	-0.0424387
M_8pcw_HIP	0.0699416	0.0347652	0.114991	-0.00980544	0.047332	0.147838	-0.0376067	-0.0109438	-0.0131731	-0.0197047	-3.66854e-05	-0.0243372	-0.0118143	-0.00507082	-0.0167512	-0.0303195	-0.0409632	-0.0105235	0.0656889	-0.0212151	0.0214065	-0.0149087	0.00468102	0.0362559	-0.0143613	0.0959357	0.003363	0.0231065	-0.0442808	-0.0527566	-0.0482732	-0.0413629	0.0138892	0.0397046	0.181245	0.0757384	0.0702986	-0.0169483	-0.0115768	0.0580436	-0.0404866
M_8pcw_VFC	-0.00576286	-0.0167624	0.0475345	-0.0357235	-0.000666658	0.0770906	-0.0550394	-0.0031384	0.00582823	-0.0183132	-0.0254631	-0.0357028	-0.0172646	-0.0176952	-0.0138724	-0.0397878	-0.0459651	-0.0136546	0.0559703	-0.0315601	0.0179169	-0.0227563	-0.0115926	-0.00818372	-0.027112	-0.0121683	-0.0205619	0.0298103	-0.0508982	-0.0490623	-0.0554669	-0.0469794	0.00712982	0.0316396	0.160037	0.0844623	0.0561305	0.00474032	-0.0171356	0.0483752	-0.0419381
M_8pcw_PCx	-0.00237051	-0.0171908	0.052774	-0.0324868	0.00459248	0.0923284	-0.0458594	-0.00516048	-0.00336398	-0.0153841	-0.0241844	-0.0331352	-0.0150034	-0.0151762	-0.0160253	-0.0251091	-0.0401116	-0.0186554	0.0334883	-0.0372103	-0.00514624	-0.0223979	-0.0133454	-0.00763957	-0.0257159	-0.0125676	-0.0184427	0.0188812	-0.0483784	-0.0386733	-0.0579813	-0.0252402	0.0156957	0.00359468	0.162629	0.0584033	0.0380666	0.00836629	0.00952385	0.0724535	-0.0340523
M_9pcw_DFC	-0.00454688	-0.0083117	0.00462069	-0.0431077	0.00161641	0.122226	-0.0430813	-0.008707	-0.0238004	-0.00668793	-0.0223134	-0.0294348	0.0033292	-0.010389	-0.00326658	0.0443713	-0.00932942	-0.0105307	0.0055721	-0.0443526	-0.0300367	-0.0217063	-0.0130918	-0.0103322	-0.0268602	-0.0149339	-0.0223697	0.00792743	-0.0467919	-0.026886	-0.0578174	-0.0180677	0.0136808	0.0301662	0.155433	0.0278925	0.0370497	0.0157144	0.0716576	0.0974487	0.00756959
M_9pcw_MFC	-0.00105549	-0.00198113	0.0320329	-0.040907	0.00764081	0.125717	-0.0381095	-0.00823524	-0.0247169	-0.011794	-0.0198704	-0.0289592	-2.16889e-05	-0.00904728	-0.00047801	0.0391957	-0.00920932	-0.0107148	0.00667774	-0.0422686	-0.0293969	-0.0196724	-0.00738909	-0.000952171	-0.0230865	-0.00726486	-0.016245	0.0113701	-0.0445937	-0.0270965	-0.0532862	-0.0144651	0.0132306	-0.000433559	0.151162	0.0295257	0.0318348	0.0107073	0.0603883	0.0914748	0.00450586
M_9pcw_AMY	-0.00870305	-0.00547139	-0.00957927	-0.0509415	-0.00572393	0.0882413	-0.0180951	-0.0127932	-0.0245833	-0.0210728	-0.0302797	-0.0320082	-0.0123796	-0.0138319	-0.0143194	-0.026044	-0.036763	-0.011018	-0.000154141	-0.046075	-0.0240097	-0.0180849	0.024593	0.0047551	-0.0238017	0.00808281	-0.00558459	0.0306031	-0.0441385	-0.0238982	-0.029824	-0.0285101	0.00975921	0.0102357	0.129412	0.047937	0.038662	-0.0080023	0.00321724	0.0754092	-0.0372704
M_9pcw_DTH	-0.00827851	-0.0114244	-0.0162531	-0.0396894	-0.013884	-0.00330718	-0.0200087	-0.0133309	-0.0215355	-0.0209611	-0.0441127	-0.0376997	-0.00442248	-0.00919557	-0.0114773	-0.0203704	-0.0301035	-0.0116906	-0.0181699	-0.0454387	-0.0348516	-0.0210994	0.0141657	0.0150053	-5.12682e-05	0.29189	0.0378261	0.0166759	-0.0393397	-0.00967963	-0.0026481	-0.00102722	0.0302071	-0.0158374	0.0305838	0.0300961	0.000955226	-0.0137501	0.0189397	0.0467716	-0.021886
M_9pcw_URL	0.00777062	-0.00400104	0.0609126	0.00474858	0.0193879	0.0249984	0.0238317	-0.0141003	-0.0240179	-0.0191702	-0.0293695	-0.0302324	-0.00295432	0.00522112	-0.00971101	0.00450492	-0.0171556	-0.0144816	-0.0122378	-0.0363812	-0.036	-0.00968785	0.0363851	0.231063	-0.000878729	0.0579644	0.0546439	0.00979315	-0.029319	0.000415587	0.0138835	0.0264625	0.045383	-0.0176304	0.0253892	0.0194417	0.00382802	-0.00560642	0.0388527	0.05729	-0.0234835
M_9pcw_LGE	-0.00969358	0.00392773	-0.014264	-0.0477159	-0.00537194	0.0864313	-0.0415749	-0.0054457	-0.0117937	0.0121895	-0.0245574	-0.0303767	0.0225864	-0.0114642	0.010766	0.0649178	0.0136682	-0.00993672	-0.0132935	-0.053365	-0.0288348	-0.0170497	0.0638539	0.000695262	-0.0253845	-0.00857894	-0.0119604	0.00703722	-0.0487787	-0.0328419	-0.0464657	-0.037312	-0.00150127	0.00150089	0.13523	0.0262412	0.0278899	-0.0136622	0.081858	0.0712642	0.086899
M_9pcw_M1C.S1C	-0.00552721	-0.00962639	0.000862592	-0.0485285	0.00364525	0.158826	-0.0416614	-0.00905119	-0.0246269	-0.0104478	-0.0177832	-0.0272001	-0.000566203	-0.0102925	-0.00412773	0.0450971	-0.00598735	-0.0112869	-0.00533942	-0.0489825	-0.0356866	-0.0236631	-0.0122083	-0.00885163	-0.0271639	-0.0146848	-0.0225657	0.0141351	-0.0473023	-0.0312701	-0.0627022	-0.0284632	0.00361499	-0.0123106	0.179404	0.026419	0.0222666	-0.000696511	0.0680123	0.104224	0.0107904
M_9pcw_MGE	-0.00657608	0.00305946	0.00084923	-0.0438903	-0.000295722	0.0847025	-0.0305962	-0.00949594	-0.0193147	-0.00238854	-0.0265421	-0.0283978	0.0131128	-0.00960456	0.00563209	0.0474295	0.0119272	-0.0118974	-0.0314618	-0.0591388	-0.031222	-0.014095	0.0827316	0.0127464	-0.0201959	0.00496945	0.000365505	0.0239178	-0.0439932	-0.0215675	-0.0280525	-0.0406978	-0.00450124	-0.0106945	0.132184	0.0350432	0.00865204	-0.0119099	0.0768455	0.0734078	0.0574557
M_9pcw_TCx	-0.00533373	-0.0153538	0.0414646	-0.0282314	-0.000730373	0.0598651	-0.0324655	-0.0146264	-0.0230195	-0.0120175	-0.033068	-0.0325762	-0.00493544	-0.0150844	-0.0142864	0.000313445	-0.0179413	-0.0185161	-0.0440101	-0.0693591	-0.0385877	-0.0217051	-0.0104057	-0.00610226	-0.027369	-0.0177501	-0.0209461	0.0394735	-0.0459237	-0.00377034	-0.0433232	-0.0414941	-0.00827596	-0.00936614	0.102992	0.0449689	0.0182491	0.0526737	0.0616561	0.0901701	-0.00969596
M_9pcw_HIP	0.0281461	-0.00115188	0.0557664	-0.0258784	0.0276586	0.12934	-0.0243597	-0.0136592	-0.0304797	-0.0217052	-0.0155891	-0.0280272	-0.00978114	-0.00895701	-0.0180785	-0.0255631	-0.0381359	-0.01724	0.0110485	-0.0412939	-0.0210736	-0.0183991	-0.00316809	0.00996447	-0.0203476	0.0157589	-0.00897711	0.0325382	-0.042145	-0.0243311	-0.0460284	-0.0283404	0.00639352	0.00158381	0.139668	0.0463999	0.0475892	0.00791876	0.000970778	0.0825392	-0.0386189
M_9pcw_Ocx	0.00194214	-0.0105062	0.0870715	-0.0306361	0.0190329	0.10836	-0.0392572	-0.0129981	-0.0259621	-0.0123973	-0.0235794	-0.0293624	-0.00594875	-0.0102224	-0.00838158	0.022593	-0.015654	-0.0112079	-0.0245336	-0.0588454	-0.0376952	-0.0217671	-0.00969288	-0.00567714	-0.0239789	-0.0109749	-0.0195842	0.0290415	-0.045639	-0.0201433	-0.0544027	-0.0267481	0.00111928	-0.0164311	0.159284	0.0391984	0.0175891	0.0239594	0.0690616	0.103715	-0.0137011
M_9pcw_CGE	-0.00935576	-0.00409522	-0.00813533	-0.053234	0.00261976	0.139374	-0.0335161	-0.014663	-0.0278757	-0.0212311	-0.0213037	-0.0303226	-0.00934907	-0.016442	-0.00414384	-0.014021	-0.036614	-0.0174978	0.0236391	-0.0394171	-0.023064	-0.0195035	0.0274408	-0.00200277	-0.0271014	-0.00668209	-0.0193743	0.015394	-0.0500175	-0.0449139	-0.0541771	-0.0335706	0.0109742	-0.0100179	0.185838	0.041649	0.049856	-0.017686	0.00424599	0.084178	-0.0306116
M_9pcw_OFC	0.00648364	-0.00570271	0.0739406	-0.0357096	0.0217212	0.127788	-0.0339454	-0.00981626	-0.0268858	-0.0120965	-0.0173618	-0.0275632	-0.00137375	-0.00646024	-0.00558664	0.0292498	-0.0162313	-0.0091811	0.017268	-0.0352185	-0.031947	-0.0166113	-0.0095183	-0.00189618	-0.0215502	-0.00373683	-0.0107551	0.00594876	-0.0425418	-0.0274631	-0.052349	-0.00211459	0.0233287	0.000331343	0.144539	0.0227751	0.0364251	0.0122125	0.0483359	0.093116	-0.00199307
M_9pcw_PCx	-0.00142618	-0.0153575	0.0779741	-0.0181837	0.00786089	0.0738223	-0.0347348	-0.0121331	-0.0249885	-0.0163002	-0.0284037	-0.0316711	-0.00804003	-0.0133999	-0.0129929	0.00507277	-0.0168089	-0.0153647	-0.0314501	-0.0626729	-0.0353992	-0.0213123	-0.0141626	-0.00989497	-0.0256067	-0.0164945	-0.0206062	0.0324132	-0.0460975	-0.0101998	-0.0489058	-0.0340301	-0.00348437	-0.0143458	0.115033	0.0422604	0.0205523	0.0450865	0.0630586	0.0903254	-0.0146766
F_12pcw_HIP	0.0110629	0.0158207	0.0236941	-0.0228874	0.00408241	0.0688079	-0.013509	-0.0125297	-0.027703	-0.0219228	-0.019626	-0.0303064	-0.0114142	-0.0130383	-0.0172663	-0.031709	-0.039902	-0.0145633	0.0567181	-0.0183001	0.0340109	-0.0188325	-0.00892762	0.00709631	-0.0202209	-0.00188206	-0.00660895	0.0326723	-0.0411282	-0.0404225	-0.0237923	-0.0240399	0.020123	0.0333673	0.079431	0.0805971	0.094718	0.0021832	-0.00718538	0.0402351	-0.0482086
F_12pcw_DTH	-0.0124089	-0.00647636	-0.0217123	-0.0430307	-0.0178647	-0.0231086	0.00322972	-0.0100045	-0.0223205	-0.0109653	-0.0439762	-0.0369197	-0.00431952	-0.00964624	-0.00402448	0.00970825	-0.0192879	-0.0186026	0.0233731	-0.0155499	-0.02059	0.0189132	0.261541	-0.000365868	-0.0149471	0.0132949	0.012844	0.00173899	-0.0310747	-0.00574881	0.0080672	0.05984	0.0665493	-0.00732389	0.0151246	0.0273308	0.0303738	-0.0118726	0.053187	0.0554832	-0.0041268
F_12pcw_AMY	-0.00525861	0.0015976	-0.0127231	-0.0320181	-0.00660865	0.0847494	-0.0083073	-0.0131693	-0.0256332	-0.0196281	-0.023237	-0.0306111	-0.00935371	-0.0148301	-0.0146425	-0.0209919	-0.0381719	-0.013359	0.0667031	-0.0197194	0.0077538	-0.0159972	0.025805	0.00090276	-0.024046	0.00392061	-0.00429362	0.0117618	-0.0455683	-0.0418511	-0.0328364	-0.013433	0.0300619	0.0577834	0.108056	0.0549538	0.0976104	-0.015764	0.00244223	0.0579466	-0.0362146
F_12pcw_A1C	-0.00615458	-0.0197323	0.0491917	-0.0197382	-0.0109392	-0.0340195	-0.0140879	-0.0139848	-0.0259698	-0.021003	-0.0478211	-0.036952	-0.0105493	-0.0156566	-0.0176784	-0.00136829	-0.0257622	-0.0146261	0.00279662	-0.0345176	-0.0328602	-0.0210831	-0.0177916	-0.0136239	-0.0241667	-0.0171842	-0.0178476	0.0184828	-0.0399733	0.00728641	-0.00735574	0.0368943	0.054867	-0.018539	0.00143688	0.0336021	0.0311661	0.0890086	0.0542723	0.0640504	-0.0242143
F_12pcw_V1C	-0.0100022	-0.0173233	0.0228922	0.0207287	-0.00405226	-0.0260516	-0.0198309	-0.0133671	-0.0230992	-0.0164299	-0.042081	-0.0363837	-0.0102796	-0.0150948	-0.0139608	-0.00551103	-0.0290695	-0.01725	0.0114053	-0.0308248	-0.0290057	-0.0184136	-0.0167169	-0.0150291	-0.0243735	-0.0208902	-0.0196982	0.0148144	-0.0403442	-0.00240079	-0.0383041	0.0435248	0.0479787	0.0207781	0.0104754	0.0331609	0.0592163	0.128001	0.0464656	0.0655088	-0.0289033
F_12pcw_MFC	-0.0117488	-0.0184401	0.0134814	-0.0205538	-0.014363	-0.0315963	-0.0222184	-0.0156812	-0.0276317	-0.0201988	-0.0496245	-0.0371738	-0.0166473	-0.0153706	-0.0200271	-0.0282099	-0.0367758	-0.0133209	-0.0167452	-0.0481599	-0.037267	-0.019287	-0.0156255	-0.0162809	-0.0235186	-0.0158953	-0.0146973	0.0364336	-0.0407127	0.0190753	-0.0208498	0.017122	0.0313433	-0.0143068	0.00788631	0.0410702	0.0246063	0.132161	0.0380306	0.0737535	-0.0374905
F_12pcw_STR	-0.00751944	-0.00103339	-0.0141673	-0.0374534	-0.0209327	-0.0129674	-0.039345	-0.0121884	-0.0108523	-0.0212857	-0.0386246	-0.0394679	-0.012677	-0.0154092	-0.019601	-0.0496854	-0.0401788	-0.0149221	0.00962029	-0.0367258	0.0623445	-0.0132801	0.0430494	0.00400227	-0.00101101	0.276696	0.0622806	0.0754987	-0.0385028	-0.0334477	0.042286	-0.069107	-0.00465537	0.0118974	0.0220911	0.117361	0.0445518	-0.015516	-0.0266785	-0.00318073	-0.0389216
F_12pcw_M1C	-0.00885401	-0.0194545	0.0539145	-0.0245622	-0.0111033	-0.0291651	-0.0247308	-0.0140018	-0.023982	-0.0205611	-0.0473885	-0.0359899	-0.0124879	-0.0137806	-0.0147607	-0.0080132	-0.0283554	-0.0170566	-0.016287	-0.0448152	-0.0371131	-0.0197467	-0.0168789	-0.0171384	-0.0231349	-0.0163729	-0.0153952	0.0323194	-0.0409597	0.0183432	-0.0225918	0.0276168	0.0370358	-0.0199057	0.00638691	0.0375399	0.0221328	0.13335	0.0548491	0.0724324	-0.0348493
F_12pcw_DFC	-0.00534584	-0.0197297	0.0771217	-0.00695994	-0.00570812	-0.0214485	-0.0247657	-0.012704	-0.0256148	-0.0202712	-0.045431	-0.0349258	-0.0125286	-0.0141237	-0.016188	-0.0180856	-0.028636	-0.0162029	-0.0295965	-0.0548388	-0.0379625	-0.0180957	-0.0156893	-0.0153463	-0.0219285	-0.0164988	-0.0162853	0.043971	-0.0418504	0.021477	-0.0232771	0.00339719	0.0219629	-0.0209298	0.0129952	0.0432451	0.016574	0.130318	0.0540424	0.0759534	-0.0329518
F_12pcw_ITC	0.000951526	-0.0193067	0.12103	0.00177273	-0.00191872	-0.0193062	-0.0160577	-0.0156017	-0.0276126	-0.0208177	-0.0432758	-0.0360223	-0.0139591	-0.0160154	-0.0200854	-0.0357939	-0.0391143	-0.0174006	0.00603506	-0.0368406	-0.00791567	-0.0193424	-0.00833028	-0.00189545	-0.0214792	-0.0105071	-0.0106212	0.0478097	-0.0391311	-0.00103578	0.00265666	-0.00517879	0.0292024	-0.00907621	0.0199959	0.0689079	0.0613993	0.0544269	0.00910253	0.0523552	-0.0382423
F_12pcw_VFC	-0.00896807	-0.0191612	0.0479442	-0.0146805	-0.0121753	-0.030109	-0.0245049	-0.0123203	-0.0244893	-0.0197407	-0.0480032	-0.0357734	-0.0123208	-0.0138648	-0.0153222	-0.00525882	-0.0249291	-0.014706	-0.0205483	-0.0500097	-0.0363082	-0.0196834	-0.0170519	-0.0171739	-0.0231895	-0.0171595	-0.015041	0.0337458	-0.0416034	0.017628	-0.0195789	0.0153321	0.0313927	-0.0146137	0.0078149	0.0399311	0.0211955	0.120587	0.0625211	0.0740097	-0.0285207
F_12pcw_STC	-0.0106417	-0.0183497	0.0210707	-0.0106853	-0.0175447	-0.0368177	-0.0159026	-0.0117834	-0.0232037	-0.0182122	-0.0493153	-0.036342	-0.00855792	-0.0148105	-0.011557	0.0129306	-0.0208831	-0.0162196	-0.0108919	-0.0408142	-0.0421365	-0.0183166	-0.0160774	-0.0144776	-0.024632	-0.0191976	-0.0209583	0.0170058	-0.0397725	0.0167957	-0.0195849	0.0413432	0.0498275	-0.0118514	0.000901652	0.0257155	0.0257436	0.117115	0.0747454	0.0738429	-0.0181158
F_12pcw_IPC	-0.0101233	-0.0191572	0.0301282	-0.0216008	-0.0159957	-0.0345586	-0.0246352	-0.0105987	-0.0246745	-0.021466	-0.0493396	-0.0363218	-0.0111438	-0.0168562	-0.0166632	-0.00694134	-0.0268502	-0.0185285	-0.0171157	-0.0475079	-0.0365311	-0.0194559	-0.0176555	-0.0163056	-0.0251333	-0.0187992	-0.0186798	0.0310299	-0.0413666	0.0175849	-0.0236697	0.018339	0.0321925	-0.0133712	0.0057972	0.0374149	0.0295179	0.123997	0.0600244	0.0708795	-0.0240235
F_12pcw_OFC	-0.0118926	-0.0219479	0.0393596	-0.0108809	-0.0106458	-0.0263961	-0.0251062	-0.0146172	-0.0249113	-0.0232226	-0.047979	-0.0378881	-0.0167583	-0.0174413	-0.0191664	-0.0418453	-0.0432473	-0.0180314	-0.0118525	-0.0487539	-0.0249979	-0.0202072	-0.0163082	-0.0165386	-0.0256451	-0.0152726	-0.0180612	0.0460598	-0.0437341	0.00947469	-0.0215	-0.00224056	0.0230508	-0.000924116	0.0157506	0.0564756	0.0375468	0.117579	0.00892419	0.0647185	-0.0441096
F_12pcw_S1C	-0.0136195	-0.018661	0.00882583	-0.0335171	-0.021661	-0.0370738	-0.0309171	-0.00944724	-0.0230691	-0.0178888	-0.0505908	-0.0371703	-0.00896663	-0.016103	-0.0145218	-0.000869092	-0.0241534	-0.0121457	-0.00724829	-0.0434797	-0.0284101	-0.0209019	-0.018356	-0.0205937	-0.0258522	-0.0196853	-0.0167514	0.029275	-0.0415212	0.0107389	-0.0262514	0.0196922	0.0363758	-0.0105016	0.00587481	0.0421883	0.0363463	0.129756	0.0635214	0.0674221	-0.0246359
F_12pcw_STC.1	-0.0170324	-0.0233929	-0.0240897	-0.00633503	-0.0227436	-0.0409209	-0.0234882	-0.0148776	-0.0286897	-0.0229122	-0.0541456	-0.0405189	-0.0159108	-0.019699	-0.020384	-0.0419461	-0.0460514	-0.0178025	0.0111773	-0.0307911	-0.0252243	-0.0216071	-0.0166837	-0.0161074	-0.0294578	-0.01981	-0.0206479	0.0487062	-0.0427272	0.00970521	-0.0206412	0.014513	0.0390157	0.0204974	0.0070917	0.0584314	0.0636773	0.137743	-0.00967334	0.0550324	-0.0440819
F_12pcw_V1C.1	-0.0160561	-0.0213484	-0.0151215	-0.00384411	-0.0145093	-0.0230566	-0.0187866	-0.0135185	-0.0300383	-0.0231871	-0.0483894	-0.0386326	-0.0153589	-0.0181385	-0.0196899	-0.030671	-0.0401126	-0.0132486	0.00420864	-0.0374749	-0.0309996	-0.0197758	-0.0164606	-0.0155482	-0.0285893	-0.0213592	-0.0240096	0.0323799	-0.0414734	0.00682801	-0.0372907	0.0208264	0.0337073	-0.00705971	0.018731	0.0397662	0.0527371	0.125127	0.0100183	0.0675721	-0.0401343
F_12pcw_A1C.1	-0.0164293	-0.0239392	-0.0262357	-0.0220602	-0.0283638	-0.045861	-0.0276147	-0.0117693	-0.0285417	-0.024021	-0.0577288	-0.0408743	-0.0176703	-0.0234075	-0.0216003	-0.0488487	-0.0453508	-0.0181184	-0.0307288	-0.0564804	-0.027989	-0.0230631	-0.0185762	-0.018425	-0.0311599	-0.02099	-0.026379	0.0687542	-0.0448604	0.0142307	-0.0123334	-0.0239422	0.0117974	0.015677	0.00790889	0.0727148	0.0446762	0.12903	-0.0029433	0.0533172	-0.0455857
F_12pcw_CB	-0.0047334	-0.00998155	-0.00848517	-0.0208376	-0.0129864	0.011745	0.000481073	-0.0158542	-0.0230586	-0.0206635	-0.0402759	-0.0324996	-0.0079609	0.00564326	-0.0138713	-0.0182943	-0.024737	-0.00527584	-0.0458097	-0.0543746	-0.0173221	-0.0113809	0.0365226	0.240368	-0.00314253	0.0574925	0.0243214	0.0706091	-0.0295863	0.0145337	0.0414819	-0.026365	0.012105	-0.00142507	0.0263841	0.0657921	-0.00762644	0.00289986	0.0353058	0.0526452	-0.0301371
F_12pcw_ITC.1	-0.016414	-0.0228058	-0.0228159	0.0108521	-0.0227664	-0.0396494	-0.0125087	-0.0139859	-0.0304037	-0.0239035	-0.0545677	-0.038716	-0.0173592	-0.0208447	-0.0189615	-0.0430804	-0.0426905	-0.0174789	-0.0164734	-0.0478692	-0.0317507	-0.0215237	-0.01334	-0.00958926	-0.0286524	-0.019493	-0.023223	0.0578002	-0.0413369	0.0185246	-0.00888108	-0.00355388	0.0227114	-0.0119953	0.00885148	0.0578422	0.0484275	0.12458	-0.000388103	0.0627838	-0.0445403
F_12pcw_IPC.1	-0.017489	-0.0234254	-0.0262406	-0.0184778	-0.0262941	-0.0435576	-0.0258679	-0.0153075	-0.0290577	-0.0234579	-0.0560369	-0.0404814	-0.0184222	-0.0222663	-0.0221609	-0.0452916	-0.0454725	-0.0173462	-0.016051	-0.0482777	-0.0290706	-0.0222907	-0.018006	-0.0190167	-0.0315087	-0.0209419	-0.0251479	0.0580903	-0.0431856	0.01292	-0.0232748	-0.00376783	0.0217897	-0.0138308	0.00800824	0.0611741	0.0479896	0.151453	-0.00333493	0.0584622	-0.0471532
F_12pcw_S1C.1	-0.019487	-0.0231833	-0.0257637	-0.0280042	-0.0272118	-0.0446147	-0.035028	-0.0146463	-0.0285197	-0.0246474	-0.0550466	-0.0413873	-0.0150034	-0.0230684	-0.0227222	-0.0451523	-0.0462741	-0.0172571	0.00245577	-0.0420668	-0.0140656	-0.0240337	-0.0184562	-0.021391	-0.0312563	-0.0222146	-0.0231279	0.0559486	-0.0454138	0.00104962	-0.0316316	-0.0111336	0.0173269	0.0100142	0.00972532	0.07309	0.0813718	0.134943	-0.00451137	0.0476608	-0.047304
F_12pcw_DTH.1	-0.010573	-0.011709	-0.0161822	-0.052234	-0.017414	-0.0218774	-0.0128601	-0.0175438	-0.0274469	-0.0222972	-0.0484074	-0.0375789	-0.0134386	-0.0105574	-0.0231404	-0.0424866	-0.041544	-0.0145787	-0.0208202	-0.0371329	-0.0194614	-0.0208129	0.0168467	0.00767761	0.00747251	0.36407	0.0614601	0.0569479	-0.0296862	0.00927848	0.0439913	-0.00412521	0.0343731	-0.0150365	0.00400037	0.057363	-0.0106924	-0.0104392	-0.0167692	0.0331336	-0.0439869
F_12pcw_HIP.1	-0.00429047	-0.00934485	-0.013941	-0.0165464	-0.00510687	0.0708243	-0.0188274	-0.0172535	-0.0309097	-0.023339	-0.0300156	-0.0324047	-0.0118388	-0.0147229	-0.0205065	-0.0341965	-0.0396135	-0.00922463	0.0189667	-0.0308611	-0.00599312	-0.0223732	-0.00817399	-0.00210791	-0.0244834	-0.00965153	-0.0148744	0.0476155	-0.0413044	-0.0198587	-0.0289135	-0.0212972	0.0190368	0.0193229	0.0877208	0.068077	0.0599994	0.0256937	-0.00711416	0.0620253	-0.0503931
F_12pcw_DFC.1	-0.0168024	-0.0238398	-0.0232873	-0.00991484	-0.028225	-0.0406715	-0.036389	-0.0153285	-0.0268578	-0.0257781	-0.0556774	-0.0406567	-0.0172637	-0.0222506	-0.0250751	-0.0504497	-0.0442882	-0.0160643	-0.0241377	-0.0543519	-0.0169572	-0.0231774	-0.0185094	-0.0170393	-0.032019	-0.0222119	-0.0228715	0.0843446	-0.0460295	0.0112093	-0.0182177	-0.0351003	0.00276389	0.0218228	0.0154904	0.0922467	0.0534665	0.136617	-0.0085523	0.0508642	-0.0432094
F_12pcw_OFC.1	-0.0170266	-0.02196	-0.0219838	-0.0144169	-0.0225447	-0.0239263	-0.0483763	-0.0155409	-0.0274587	-0.0233741	-0.0518642	-0.0405199	-0.0158457	-0.0214449	-0.0246194	-0.0540924	-0.0457978	-0.0111979	-0.00866148	-0.0498618	-0.000845617	-0.0237422	-0.0177087	-0.0192914	-0.0317159	-0.0208357	-0.0194835	0.0911111	-0.0477792	0.000889455	-0.0281461	-0.0529698	-0.007451	0.0324364	0.0349595	0.107955	0.0755452	0.116854	-0.0191227	0.0451015	-0.0531035
F_12pcw_M1C.1	-0.0173934	-0.0223509	-0.027016	-0.0368625	-0.0256245	-0.043197	-0.0211278	-0.0135673	-0.0266831	-0.0227847	-0.0537597	-0.0386703	-0.0151409	-0.0170336	-0.0189601	-0.0127835	-0.0320038	-0.0175355	-0.0162111	-0.0445404	-0.0453565	-0.0213792	-0.0181489	-0.0203656	-0.0281083	-0.0206572	-0.0207387	0.0248658	-0.0415553	0.0220007	-0.0280521	0.0397814	0.0437101	0.00059128	-0.00180228	0.0273602	0.0304574	0.14054	0.0391394	0.0694912	-0.0369287
F_12pcw_VFC.1	-0.0187496	-0.0238721	-0.0268668	-0.0292859	-0.027593	-0.040894	-0.0407554	-0.0159801	-0.0309631	-0.0247613	-0.0560914	-0.0416404	-0.0171712	-0.0213238	-0.0217675	-0.0519202	-0.047412	-0.0158935	0.0034518	-0.0404655	-0.0126972	-0.0241296	-0.0197698	-0.0211867	-0.0325654	-0.0190454	-0.0217378	0.0767777	-0.0456778	0.00392244	-0.0263948	-0.0257348	0.0126145	-0.0161249	0.0165325	0.0884983	0.0623314	0.133068	-0.0198579	0.0479834	-0.0523904
F_12pcw_AMY.1	-0.0088761	-0.00761207	-0.0159232	-0.0477145	-0.0101642	0.0241562	0.00727097	-0.0136119	-0.0302736	-0.0228955	-0.0369575	-0.0344435	-0.0142081	-0.0107482	-0.0147796	-0.0329041	-0.0386371	-0.0152492	0.0232852	-0.020596	-0.00884357	-0.00760584	0.0669365	0.00910461	-0.0153965	0.0202402	0.0135632	0.0436546	-0.032336	-0.0102698	0.0181422	0.00436546	0.0378772	-0.0213768	0.0522056	0.05703	0.03339	-0.00156617	-0.00774329	0.0489152	-0.0452829
F_12pcw_STR.1	-0.0134034	-0.00673503	-0.0184095	-0.0525435	-0.0152619	0.000952963	-0.0395508	-0.0143279	-0.0310155	-0.0258646	-0.0428742	-0.0390876	-0.0135842	-0.0161313	-0.0200212	-0.0440838	-0.0426769	-0.00968397	0.0488518	-0.0174232	0.0231075	0.00938193	0.270836	-0.00146316	-0.0228021	0.0140631	0.000766747	0.0715075	-0.0396101	-0.0153431	-0.00218163	-0.032362	0.01687	-0.00815619	0.0622137	0.10062	0.0889951	-0.00610458	-0.0223494	0.0388451	-0.051046
F_12pcw_AMY.2	-0.0098112	-0.00355867	-0.0157183	-0.0324205	-0.0185375	0.0204891	-0.0179595	-0.00817363	-0.0182949	-0.0227352	-0.0379513	-0.0349415	-0.0133578	-0.0137973	-0.0182745	-0.0392026	-0.0391359	-0.0115832	0.0210667	-0.0304312	0.0233811	-0.0100961	0.0410425	0.015588	-0.0162069	0.0187283	0.00893539	0.0663264	-0.035377	-0.0118069	0.0189399	-0.036084	0.0114697	0.0318005	0.0717636	0.0952784	0.0430074	-0.00418648	-0.00415944	0.0355984	-0.0389675
F_12pcw_M1C.2	-0.0180376	-0.0235213	-0.028148	-0.0371635	-0.0329	-0.0465275	-0.0436317	-0.0106415	-0.0196779	-0.023761	-0.0580551	-0.0415653	-0.0164962	-0.0251707	-0.0214763	-0.0508503	-0.0464062	-0.0128497	-0.015883	-0.0571158	-0.00363405	-0.0248499	-0.0202736	-0.0229376	-0.0317956	-0.0243569	-0.0214704	0.065233	-0.0485115	-0.00557458	-0.0230496	-0.0400149	0.00157085	0.0230902	0.0192698	0.0948448	0.0495618	0.120977	0.00245674	0.0448385	-0.0417216
F_12pcw_ITC.2	-0.0166919	-0.0232502	-0.0258308	0.0123702	-0.0278766	-0.0396731	-0.0403542	-0.0123943	-0.0275397	-0.0242877	-0.0549593	-0.0410946	-0.0179628	-0.0253218	-0.0223377	-0.0527629	-0.0461865	-0.0145034	0.0160641	-0.0420719	0.0126575	-0.0237588	-0.0171053	-0.0155863	-0.0306209	-0.0194491	-0.0234062	0.0748997	-0.045482	-0.0189058	-0.0139183	-0.0431448	0.00640445	0.0172709	0.0281845	0.112112	0.0858834	0.0806644	-0.012665	0.0368536	-0.049677
F_12pcw_VFC.2	-0.0175304	-0.0233293	-0.0225284	-0.0276672	-0.0292329	-0.0466956	-0.0455187	-0.0112276	-0.014888	-0.0241986	-0.0564865	-0.0426155	-0.0202873	-0.0260138	-0.0242933	-0.0539884	-0.0490661	-0.00846219	0.0209819	-0.0389089	0.0115869	-0.0258155	-0.0222231	-0.0216715	-0.0314746	-0.0234919	-0.0185643	0.0605078	-0.0497869	-0.0225592	-0.0176177	-0.0421049	0.0082671	0.0406819	0.0191835	0.106707	0.0861968	0.0882605	-0.0194874	0.0284197	-0.0449737
F_12pcw_STR.2	-0.0119135	-0.002943	-0.0203479	-0.0453859	-0.020309	-0.0214046	-0.00448776	-0.00914766	-0.0223774	-0.0190413	-0.044344	-0.0352264	-0.0138717	-0.0091067	-0.0122646	-0.00842983	-0.0238528	-0.0142254	0.00216701	-0.0281758	-0.000197023	0.0250322	0.270402	0.00298284	-0.0131725	0.0109148	0.0153071	0.0378028	-0.0299818	0.00573141	0.0182713	0.015136	0.0431522	-0.014245	0.0315831	0.0607054	0.00936105	-0.00815802	0.0515636	0.0485809	-0.0310776
F_12pcw_CBC	-0.00511697	-0.0135355	-0.00891336	-0.0155774	-0.0144649	0.00708667	-0.0168526	-0.011509	-0.0159588	-0.021531	-0.0368432	-0.0340491	-0.012851	0.00715337	-0.0178916	-0.0348599	-0.0362442	-0.00940515	0.0309652	-0.0200007	0.0395318	-0.00734877	0.0437638	0.302936	-0.00568379	0.0419362	0.0225373	0.0634552	-0.032254	-0.0185015	0.0254509	-0.0279911	0.0242516	0.00271341	0.0465974	0.0983728	0.0312146	-0.00274903	-0.000285899	0.0311066	-0.0370048
F_12pcw_DTH.2	-0.00964813	0.000755094	-0.0164036	-0.0326613	-0.0175187	-0.0162561	-0.0245171	-0.00847225	-0.0259612	-0.0222406	-0.0417465	-0.0369366	-0.0165428	-0.011247	-0.0190313	-0.0484496	-0.0424574	-0.0163013	0.0383985	-0.0106325	0.0448179	-0.0131385	0.0313082	0.0119715	0.0110325	0.327383	0.0920841	0.0796779	-0.0274478	-0.0113922	0.0496901	-0.0299299	0.0241095	-0.00848449	0.0227816	0.10925	0.0120516	-0.0152145	-0.0272542	0.0111255	-0.0434399
F_12pcw_DFC.2	-0.018086	-0.0221487	-0.0274521	-0.0376649	-0.0313669	-0.0380873	-0.0450737	-0.00811744	-0.0173725	-0.0234554	-0.0550281	-0.0406056	-0.0156173	-0.0233557	-0.0220968	-0.0481011	-0.0437448	-0.0147454	-0.0140794	-0.0551708	-0.00514318	-0.0243788	-0.0194789	-0.0206496	-0.0300542	-0.0231425	-0.0223017	0.0622223	-0.0492095	-0.0114293	-0.028279	-0.0380166	0.00323545	0.0848899	0.0259697	0.0935663	0.0518831	0.116394	0.0080598	0.0467832	-0.040501
F_12pcw_OFC.2	-0.0177525	-0.0208223	-0.0270647	-0.033094	-0.0321445	-0.0390537	-0.0387063	-0.0090619	-0.0175195	-0.0232058	-0.0566935	-0.0402171	-0.013589	-0.022561	-0.0209695	-0.0426528	-0.0405557	-0.015048	-0.0288008	-0.0627467	-0.0110137	-0.0240899	-0.0156649	-0.0195185	-0.030225	-0.0233352	-0.0207984	0.0656556	-0.0478602	0.000795643	-0.0167405	-0.0407085	-0.00108953	0.0197518	0.0223078	0.0886717	0.0348774	0.107783	0.0243632	0.0539324	-0.0377233
F_12pcw_S1C.2	-0.0179778	-0.0237179	-0.0285557	-0.0364006	-0.0314582	-0.0477403	-0.0394883	-0.00806163	-0.0219465	-0.0241107	-0.0575877	-0.0421302	-0.0173735	-0.0256672	-0.0256874	-0.0502561	-0.0473493	-0.0172973	0.0063499	-0.043929	-0.00392593	-0.024712	-0.021763	-0.0212993	-0.032326	-0.0231415	-0.0205912	0.0582692	-0.0471643	-0.00818324	-0.0170861	-0.0269596	0.0142672	0.0199687	0.0143795	0.089214	0.0604085	0.102052	-0.00655884	0.0421641	-0.0441263
F_12pcw_V1C.2	-0.015636	-0.0169642	-0.0246269	-0.00195431	-0.0261713	-0.0293008	-0.0373549	-0.0131581	-0.023435	-0.0192926	-0.0510816	-0.0372224	-0.0161802	-0.0191485	-0.0183032	-0.0171546	-0.030929	-0.0122834	-0.0193496	-0.0532234	-0.0153048	-0.0217406	-0.0167875	-0.0176089	-0.0290335	-0.025275	-0.0236063	0.0540605	-0.0444488	0.0059454	-0.0383847	-0.0134006	0.0124713	-0.00436348	0.0340394	0.0724323	0.0366155	0.136936	0.0585125	0.0693542	-0.0329412
F_12pcw_MFC.1	-0.0169961	-0.0190252	-0.0258601	-0.0312754	-0.0279006	-0.0364292	-0.0365547	-0.0110894	-0.0186103	-0.0219802	-0.0549359	-0.0382896	-0.0143566	-0.0200604	-0.0189897	-0.026106	-0.0338813	-0.0137814	-0.0316319	-0.0601179	-0.0209297	-0.0216629	-0.0149173	-0.0200876	-0.0282134	-0.0212087	-0.0201378	0.0546359	-0.0457183	0.00655111	-0.0242038	-0.021857	0.00694491	0.00690655	0.0204483	0.071408	0.0262187	0.129609	0.048838	0.0649185	-0.0367161
F_12pcw_HIP.2	-0.00888405	-0.00574601	-0.0165934	-0.0100352	-0.0129741	0.0305794	-0.0256272	-0.0105671	-0.0191739	-0.0232348	-0.0359278	-0.0336204	-0.0159864	-0.017711	-0.0181199	-0.0235955	-0.0349595	-0.0142354	0.0121681	-0.0406738	0.0105759	-0.0203698	-0.00989792	-0.00478785	-0.0251798	-0.0138251	-0.0146539	0.0414469	-0.0444417	-0.0198444	-0.024045	-0.0284256	0.0130207	0.00302013	0.07096	0.0794113	0.0537335	0.0339795	0.0309984	0.05472	-0.0336201
F_12pcw_IPC.2	-0.0186498	-0.0238475	-0.0271271	-0.0308042	-0.0335409	-0.0481143	-0.0542171	-0.0167253	-0.0259234	-0.024941	-0.0579249	-0.0432297	-0.0152513	-0.0280847	-0.0221459	-0.0588576	-0.0488389	-0.0147666	0.00910946	-0.0487475	0.0244978	-0.0261087	-0.0218021	-0.0219893	-0.0343555	-0.0242631	-0.021452	0.0903075	-0.0491103	-0.023326	-0.019508	-0.0648042	-0.0079987	0.0491622	0.0298291	0.138259	0.0825522	0.0958964	-0.0216126	0.0266458	-0.0489472
F_12pcw_A1C.2	-0.0161986	-0.0213109	-0.0239698	-0.0229856	-0.0294694	-0.0429509	-0.039559	0.00354749	-0.0151605	-0.0220513	-0.0573704	-0.0401573	-0.0156885	-0.0241346	-0.0188705	-0.0378201	-0.0375516	-0.0125213	-0.0269371	-0.0620499	-0.00796741	-0.0247338	-0.0195398	-0.0172096	-0.0305294	-0.0220441	-0.0240348	0.0655127	-0.0458407	0.00502139	-0.000662697	-0.0420665	0.0027759	0.0922823	0.0177872	0.0904505	0.0440473	0.0823837	0.0325042	0.051905	-0.0340615
M_13pcw_STR	-0.0126608	-0.0086184	-0.0219828	-0.0279861	-0.0189187	-0.0152114	0.0039975	-0.0101917	-0.0201536	-0.019721	-0.0440138	-0.0348142	-0.00745957	-0.00892161	-0.0086437	-0.0187447	-0.0295666	-0.0126998	-0.00333024	-0.0369751	-0.0228221	0.0230905	0.263432	-0.000672093	-0.0146225	0.0106077	0.0125632	0.0286331	-0.032258	0.0162347	0.0118602	0.0241083	0.0446564	0.0239854	0.0261509	0.0408525	0.018727	-0.00250696	0.0428083	0.0647403	-0.0265618
M_13pcw_M1C	-0.0176249	-0.0218314	-0.0295966	-0.0589202	-0.0342526	-0.0462296	-0.0210433	-0.0129641	-0.0226508	-0.0224635	-0.0580551	-0.0391251	-0.0148706	-0.0206395	-0.0198967	-0.0372001	-0.0395308	-0.0181235	-0.0325583	-0.0568769	-0.0344708	-0.0224576	-0.020834	-0.0194582	-0.0281016	-0.0180772	-0.0183559	0.0424092	-0.0428251	0.0243549	0.00839114	-0.000594199	0.0275685	-0.00457623	0.00227684	0.0484013	0.0135361	0.0959579	0.0291874	0.0594879	-0.0365324
M_13pcw_AMY	-0.0138173	-0.015066	-0.0250326	-0.0562789	-0.0234428	0.0118124	-0.0183317	-0.0131008	-0.022903	-0.0210016	-0.0442436	-0.0333279	-0.0129248	-0.0161496	-0.0158186	-0.0137621	-0.029614	-0.0158796	-0.0140864	-0.0489431	-0.0346241	-0.0198883	-0.00995155	-0.0143022	-0.0266422	-0.0164651	-0.0145917	0.0262304	-0.0424662	0.0103011	-0.0221842	0.00989598	0.0318638	0.0190677	0.044409	0.0354427	0.0166632	0.0658099	0.0552327	0.0804301	-0.0343352
M_13pcw_S1C	-0.0169881	-0.0227853	-0.0300924	-0.060031	-0.0347691	-0.049299	-0.017269	-0.0113822	-0.020325	-0.024597	-0.0583557	-0.0406781	-0.0163878	-0.0215043	-0.0176807	-0.0378508	-0.0412439	-0.0165356	-0.0184148	-0.0487935	-0.0363259	-0.0222924	-0.0214219	-0.0192828	-0.0286184	-0.0191173	-0.0192927	0.032985	-0.0421448	0.0215408	0.00674827	0.0156004	0.038822	0.0155436	-0.00162342	0.0410921	0.0204797	0.0926359	0.0171532	0.056994	-0.039321
M_13pcw_V1C	-0.016267	-0.0151379	-0.0280514	-0.0495263	-0.029692	-0.0304933	-0.0249056	-0.00761731	-0.0157098	-0.0159114	-0.0512392	-0.0367394	-0.00312089	-0.0176491	-0.0133606	-0.00549208	-0.0261394	-0.0158934	-0.0149098	-0.0472048	-0.0381346	-0.0200315	-0.0163066	-0.0164564	-0.026593	-0.0206644	-0.0194717	0.0217443	-0.0423029	0.016271	-0.031879	0.0209806	0.0337888	0.0214437	0.0152176	0.0303752	0.0250678	0.132157	0.0699298	0.0738681	-0.0206106
M_13pcw_A1C	-0.0144012	-0.0213789	-0.0231765	-0.0512037	-0.0228004	0.00972647	-0.0305625	-0.0141003	-0.0220128	-0.024047	-0.0437533	-0.0374927	-0.017261	-0.0226732	-0.0196496	-0.0472816	-0.0458591	-0.0187264	0.00790227	-0.0487646	-0.00990031	-0.0236706	-0.019193	-0.0135461	-0.030724	-0.0175615	-0.0216266	0.0421619	-0.0484564	-0.0157758	-0.0222438	-0.0318901	0.0107968	0.0719719	0.0578659	0.0685096	0.0744925	0.0397812	-0.0116217	0.0557083	-0.0415757
M_13pcw_HIP	-0.00756067	-0.0100463	-0.0137421	-0.0433094	-0.0128136	0.0352671	0.000134935	-0.0117422	-0.0172519	-0.023964	-0.0317533	-0.032849	-0.0149987	-0.0123727	-0.0188329	-0.041838	-0.0455902	-0.00814507	0.0372112	-0.023412	0.000748202	-0.0225194	-0.012458	-0.00612563	-0.023504	-0.00869716	-0.011079	0.032282	-0.0423238	-0.0217025	-0.0173865	-0.0124218	0.0244954	0.0722228	0.0490616	0.0620456	0.0692199	0.027546	-0.0213635	0.0426713	-0.043122
M_13pcw_VFC	-0.0177675	-0.0208008	-0.0281824	-0.0601138	-0.0323852	-0.0469345	-0.00836895	-0.0147952	-0.0181625	-0.0176682	-0.0571247	-0.0396807	-0.0153536	-0.0179945	-0.0170147	-0.0293731	-0.0395617	-0.0164709	-0.00992463	-0.0413209	-0.0373419	-0.0201529	-0.0182058	-0.0194628	-0.0270261	-0.0181255	-0.0141743	0.0175408	-0.0415474	0.0163542	0.00995564	0.0343683	0.0551931	0.00742458	-0.00228141	0.0318501	0.0194649	0.0867964	0.0287467	0.05901	-0.0398029
M_13pcw_MFC	-0.016853	-0.0217266	-0.0279107	-0.0587153	-0.0332117	-0.0420072	-0.0247268	-0.0144602	-0.0248234	-0.0233164	-0.058062	-0.0407885	-0.0133994	-0.0212391	-0.0219477	-0.0464504	-0.0451997	-0.0169014	-0.00224418	-0.0445875	-0.0184477	-0.0221953	-0.020422	-0.0216243	-0.0290562	-0.0204675	-0.0178034	0.0459539	-0.0441486	0.00677469	-0.00467427	-0.00328222	0.0268854	0.0244393	0.0145058	0.0668846	0.0317644	0.103653	0.00035129	0.0548817	-0.0458307
M_13pcw_STC	-0.0149091	-0.0165908	-0.0273219	-0.0522918	-0.0283148	-0.0216006	-0.0209345	-0.0117617	-0.0211799	-0.0205574	-0.0509011	-0.0360037	-0.00653415	-0.0170293	-0.0157737	-0.0124646	-0.0282073	-0.0159527	-0.0260923	-0.0522599	-0.0422979	-0.0197311	-0.0181197	-0.01554	-0.0270977	-0.0171761	-0.0176426	0.0265634	-0.0426048	0.0256852	-0.010427	0.0128031	0.0342397	0.00345563	0.0170459	0.0295476	0.0124418	0.0817689	0.060433	0.0777134	-0.0251806
M_13pcw_OFC	-0.017073	-0.0220671	-0.0264365	-0.0571608	-0.027899	-0.0161705	-0.0247377	-0.0169814	-0.023714	-0.0218012	-0.0506104	-0.0392413	-0.0129512	-0.0220841	-0.0210064	-0.0462641	-0.0460399	-0.0172016	0.00999829	-0.0416965	-0.0105554	-0.0228723	-0.0152249	-0.0175358	-0.0295818	-0.0170572	-0.0162767	0.037996	-0.0458559	-0.00922883	-0.00638706	-0.0121118	0.0273167	0.0181983	0.0340895	0.0666128	0.0518227	0.068356	-0.00872017	0.051225	-0.0473604
M_13pcw_IPC	-0.0165395	-0.0209695	-0.0290015	-0.0555169	-0.0333094	-0.0429887	-0.0261444	-0.0110307	-0.0216474	-0.0226004	-0.0573401	-0.038184	-0.0151273	-0.0205021	-0.0192877	-0.0262399	-0.0336662	-0.0177194	-0.0349747	-0.0583709	-0.0375169	-0.0221133	-0.0224812	-0.0195758	-0.0288301	-0.019306	-0.0197905	0.0396815	-0.0428159	0.0284236	-0.00533995	0.00105782	0.0243514	0.00961857	0.00600541	0.0428067	0.0146673	0.10229	0.0467754	0.0705539	-0.0321831
M_13pcw_DFC	-0.017851	-0.0220891	-0.0278834	-0.0586528	-0.0321664	-0.041466	-0.0164926	-0.0122366	-0.0224097	-0.0216809	-0.0559746	-0.0396739	-0.0148664	-0.0196869	-0.0184407	-0.0385504	-0.041439	-0.0177817	-0.0126445	-0.047794	-0.0295766	-0.0217922	-0.0189719	-0.0207341	-0.0276692	-0.019132	-0.0159818	0.0291526	-0.043238	0.0110448	-0.00184117	0.00835356	0.0367347	0.0523239	0.00633254	0.0454393	0.0305431	0.0926968	0.0205721	0.0587965	-0.043743
M_13pcw_ITC	-0.0159404	-0.0179517	-0.0251827	-0.0575515	-0.0256751	-0.00499001	-0.0147627	-0.0119527	-0.01922	-0.0209277	-0.0457256	-0.0347785	-0.0101032	-0.0145516	-0.0139738	-0.00306367	-0.0309496	-0.0128131	0.00108773	-0.0363532	-0.0394965	-0.019314	-0.0193691	-0.0168135	-0.0256255	-0.0176808	-0.0138206	0.00546138	-0.0417104	0.00749853	-0.0209437	0.043583	0.0535537	0.0279616	0.0264749	0.0195856	0.0223617	0.0790768	0.0534875	0.0755374	-0.0262228
F_13pcw_STR	-0.0124571	-0.00210134	-0.0127993	-0.0434623	-0.00562103	0.0105389	0.00188655	-0.0124833	-0.0223803	-0.0211066	-0.035253	-0.0344209	-0.00459391	-0.00607001	-0.0110551	0.0232219	-0.022619	-0.0189861	0.0555878	-0.000551409	-0.0296203	0.012712	0.242151	0.00251718	-0.0161444	0.0120056	0.00756605	-0.0210478	-0.0325976	-0.0124366	-0.0102236	0.0869947	0.08225	-0.012643	0.0387288	0.00613724	0.0447279	-0.012753	0.0413127	0.063096	-0.030436
F_13pcw_S1C	-0.0168754	-0.0207659	-0.0268679	-0.0439292	-0.0262478	-0.0440726	-0.0144996	-0.0137341	-0.0258044	-0.0228735	-0.0535364	-0.0391124	-0.0132762	-0.016009	-0.0127113	0.00107214	-0.031901	-0.0201373	0.00809364	-0.0303102	-0.0457425	-0.020994	-0.0195062	-0.020861	-0.0274663	-0.0180416	-0.0178623	-0.00125665	-0.0398341	0.00802387	-0.0282836	0.0692522	0.0636239	-0.0146384	-0.00547198	0.0140521	0.0353312	0.120539	0.050491	0.0696808	-0.0351049
F_13pcw_V1C	-0.0151327	-0.0176756	-0.0207132	-0.00198464	-0.0134402	-0.0146802	-0.0165261	-0.0113693	-0.0283045	-0.0198658	-0.0439638	-0.0365986	-0.0110182	-0.0166307	-0.0173618	0.00475288	-0.0310924	-0.0194061	0.0270652	-0.0225565	-0.0389474	-0.0202477	-0.0172659	-0.0155425	-0.0275065	-0.0201683	-0.0208819	-0.00317416	-0.0393002	-0.00226319	-0.0438383	0.0648616	0.0567813	-0.0126463	0.0188342	0.0137249	0.0583333	0.117317	0.0425517	0.074187	-0.0313956
F_13pcw_AMY	-0.00941187	-0.00322809	-0.0159206	-0.0435589	-0.00529928	0.0649065	0.00480446	-0.00893121	-0.0283979	-0.0207339	-0.0293086	-0.0290865	-0.00411461	-0.00961863	-0.0103097	0.0322883	-0.0188157	-0.0194535	0.0309098	-0.0225103	-0.032977	-0.0117516	0.0373436	0.00294709	-0.0215198	0.00392729	-0.00916518	-0.0053454	-0.0371646	-0.0148754	-0.0192186	0.0400936	0.0536942	-0.0171214	0.0754622	0.0151588	0.0401792	-0.00283694	0.0537806	0.0785774	-0.0272425
F_13pcw_IPC	-0.0178998	-0.023755	-0.0264758	-0.0251712	-0.0252953	-0.0454199	-0.0218006	-0.0171582	-0.0305249	-0.02466	-0.054911	-0.041436	-0.0164082	-0.0224751	-0.0210451	-0.0397121	-0.045944	-0.0217936	0.0262539	-0.0284188	-0.0299315	-0.0227381	-0.0228764	-0.0205551	-0.0302847	-0.0189382	-0.0237644	0.020076	-0.0418729	0.00248012	-0.0274393	0.026518	0.0428175	-0.0110605	-7.8744e-05	0.0368258	0.0671273	0.105983	-0.00345179	0.0568036	-0.0475204
F_13pcw_CB	0.0347823	0.0109893	0.00554499	-0.00996763	0.0160548	0.0490965	0.0310267	-0.0113762	-0.0239594	-0.0194624	-0.0205655	-0.0260569	0.00741837	0.0238848	-0.00402798	0.0303332	-0.0172082	-0.016227	0.0606432	0.00513007	-0.0205647	-0.00560752	0.0301057	0.306745	0.00199856	0.0441772	0.0331923	-0.0252037	-0.0250294	-0.0168592	0.000529398	0.0665926	0.0727301	0.00526518	0.0377253	0.00247371	0.0486713	-0.0110263	0.0426017	0.0614658	-0.0308625
F_13pcw_DFC	-0.0164396	-0.0204356	-0.0251909	-0.0376633	-0.0233497	-0.0297518	-0.0253497	-0.0122351	-0.0302713	-0.0232755	-0.0507023	-0.0380164	-0.0099651	-0.0165622	-0.0164824	0.00157463	-0.0281519	-0.0195664	0.0141276	-0.0334146	-0.0288401	-0.0207415	-0.0185053	-0.0203377	-0.0280208	-0.0185558	-0.0186615	0.0152708	-0.0410196	0.00184492	-0.032725	0.0303966	0.0420557	-0.0169197	0.0106846	0.0348148	0.0512389	0.112239	0.0597396	0.0697162	-0.037176
F_13pcw_OFC	-0.0116665	-0.0142859	-0.0199617	-0.0269235	-0.0231478	-0.0265621	-0.0268516	-0.00512159	-0.0227367	-0.0100616	-0.0476481	-0.0369887	0.0110334	-0.0161729	-0.00844072	-0.0141316	-0.0264963	-0.00752963	-0.0203148	-0.0511568	-0.045594	-0.0161322	-0.0141847	-0.013824	-0.0242505	-0.0150121	-0.0163156	0.0050201	-0.0451108	-0.00179367	-0.0314517	0.00404694	0.0213583	-0.00601639	0.00802577	0.0183922	0.0251355	0.0822206	0.0288648	0.0554205	0.0039406
F_13pcw_STC	-0.0187264	-0.0238887	-0.025399	-0.021718	-0.0251457	-0.0457816	-0.0314696	-0.0148208	-0.0300675	-0.0242014	-0.0537705	-0.0431852	-0.0119784	-0.02377	-0.0190428	-0.0383356	-0.0466879	-0.0165029	0.0685363	-0.0121517	0.00265873	-0.0230354	-0.0211599	-0.0180623	-0.0311552	-0.0204044	-0.020107	0.022203	-0.0449345	-0.0211868	-0.0163454	0.00679256	0.0427184	0.0243708	0.00649423	0.0630247	0.112621	0.0589589	-0.00905931	0.037655	-0.0461775
F_13pcw_A1C	-0.0162086	-0.0210476	-0.0231732	-0.0313638	-0.019788	-0.041097	0.00790047	-0.0175814	-0.0299221	-0.0249672	-0.0511217	-0.041175	-0.0152621	-0.0180767	-0.0178029	-0.0343686	-0.0443914	-0.0189416	0.0402508	-0.00887947	-0.0307639	-0.0164433	-0.00106537	-0.00800477	-0.0217328	-0.00233673	-0.0107593	0.00722342	-0.0337461	0.00247991	0.0325808	0.0573538	0.0702755	-0.0121707	-0.00794185	0.0241396	0.0482443	0.0406777	-0.0103329	0.0426881	-0.0498612
F_13pcw_HIP	-0.00030428	0.0092783	-0.00656164	-0.0253095	0.00357769	0.0728699	-0.000879935	-0.0146006	-0.0324069	-0.0235554	-0.024982	-0.0267269	-0.00857185	-0.00988588	-0.0112578	0.01666	-0.0196943	-0.0156378	0.0279105	-0.0259223	-0.022309	-0.0176482	-0.00612607	0.00275495	-0.0197923	-0.00436727	-0.0130844	0.00776414	-0.0356408	-0.0137393	-0.0258775	0.0213505	0.0367086	-0.0158142	0.0663501	0.0272023	0.0452152	0.0126173	0.0489218	0.0769811	-0.0315626
F_13pcw_M1C	-0.0173209	-0.0222706	-0.0262538	-0.0440274	-0.0279921	-0.0448697	-0.0222742	-0.0152603	-0.0286667	-0.0248536	-0.0553747	-0.0401922	-0.014042	-0.0190111	-0.0177606	-0.0211791	-0.0381062	-0.0211852	0.0030612	-0.0384264	-0.0389483	-0.0209231	-0.0191395	-0.0207253	-0.028602	-0.0177987	-0.0218172	0.0186725	-0.0423013	0.0127808	-0.0271603	0.0336092	0.0426888	-0.00931711	-0.0012906	0.0306765	0.0422229	0.126834	0.0297565	0.0681309	-0.0428721
F_13pcw_ITC	-0.0177898	-0.0231147	-0.0244521	-0.00982456	-0.0231538	-0.0432462	-0.0180965	-0.0166657	-0.0299406	-0.0245938	-0.0532594	-0.0410868	-0.014894	-0.0217303	-0.0186276	-0.0367943	-0.0455653	-0.0180832	0.0682379	-0.0110899	-0.0125309	-0.022404	-0.0157286	-0.00984148	-0.0279154	-0.0151878	-0.0191479	0.0190752	-0.0413434	-0.0107374	-0.014555	0.0233421	0.0491617	0.00399653	0.00433438	0.0468984	0.104536	0.0603531	-0.0104434	0.0465513	-0.051087
F_13pcw_MD	-0.00721916	-0.00862881	-0.0131546	-0.0460259	-0.00953571	-0.0232705	0.00924135	-0.015348	-0.0286587	-0.0243647	-0.0414063	-0.0375819	-0.0125676	-0.00217182	-0.0180135	-0.0307291	-0.0400901	-0.0168001	0.0569963	0.0145878	-0.0158825	-0.0100453	0.0220218	0.00794748	0.0213828	0.373219	0.111446	0.00250168	-0.0206129	-0.00201432	0.0461357	0.0718696	0.0856436	-0.0154152	-0.00920835	0.0186384	0.0112226	-0.0165946	-0.018699	0.024356	-0.0439486
F_13pcw_MFC	-0.0140017	-0.0175285	-0.0221174	-0.0313962	-0.0174204	-0.0172333	-0.0186905	-0.0156792	-0.0255654	-0.0208633	-0.0471525	-0.0366778	-0.0122688	-0.0143546	-0.0163339	-0.00163873	-0.031399	-0.0169063	0.00543613	-0.0327351	-0.0408	-0.0184091	-0.0152489	-0.0177375	-0.0265394	-0.0166905	-0.0180077	0.00835908	-0.0409962	0.00255501	-0.0320387	0.0500042	0.0498569	-0.0181426	0.0171633	0.0234956	0.03444	0.113167	0.0470947	0.0740767	-0.0363308
F_13pcw_VFC	-0.0179558	-0.0242609	-0.0254931	-0.0288249	-0.0247462	-0.0448794	-0.0112164	-0.0158304	-0.0278049	-0.0238366	-0.0550384	-0.0406481	-0.0146795	-0.0196842	-0.0189695	-0.0300458	-0.0433423	-0.0182226	0.0152882	-0.0296722	-0.0415832	-0.0218971	-0.0191776	-0.020493	-0.0287923	-0.0177107	-0.0220813	0.00710419	-0.0418991	0.00604827	-0.0222857	0.0487929	0.0570195	-0.0131273	-0.00520751	0.0236424	0.0433831	0.0991594	0.00755449	0.063748	-0.0478176
M_13pcw_S1C.1	-0.0193192	-0.0224759	-0.0274723	-0.0366979	-0.0323116	-0.0509199	-0.0460134	-0.0084676	-0.0120721	-0.0234523	-0.0553346	-0.0433248	-0.0135518	-0.0258855	-0.0208945	-0.0407984	-0.0431609	-0.0138446	-0.00126411	-0.0529323	-0.0110493	-0.025164	-0.0228919	-0.0229602	-0.0344233	-0.0260185	-0.0226391	0.025007	-0.0529666	-0.0231206	-0.0366803	-0.0338951	0.00703461	0.0086084	0.0118668	0.0692834	0.0850469	0.106061	0.00460713	0.0322653	-0.0362708
M_13pcw_DFC.1	-0.0193699	-0.0216254	-0.023464	-0.0366625	-0.0307447	-0.0494437	-0.0482527	0.00512455	-0.00663013	-0.0214093	-0.053553	-0.0435263	-0.0163573	-0.0262426	-0.0184921	-0.043767	-0.0441348	-0.0148999	0.00397925	-0.0531222	0.00433064	-0.0255432	-0.0232027	-0.0231935	-0.0344257	-0.0268408	-0.0203702	0.0224763	-0.0542377	-0.0377014	-0.0374404	-0.0452386	0.00358373	0.0364582	0.0173084	0.0821129	0.0935271	0.091429	-0.00205984	0.0229197	-0.0374042
M_13pcw_CB	-0.00167891	-0.00281498	-0.0116276	-0.0227062	-0.00627129	0.0118353	0.0138886	0.00731102	0.0130888	-0.012708	-0.0334026	-0.0327547	-0.00262913	0.0109747	-0.00375368	0.0160127	-0.0185585	-0.0125866	0.00180056	-0.0283792	-0.0308997	-0.0103708	0.0345539	0.278624	-0.004193	0.0359905	0.0328989	-0.019793	-0.0347137	-0.0199249	0.00690273	0.0372163	0.0580236	0.00739856	0.0200998	0.00979003	0.008846	-0.011437	0.0508374	0.0402746	-0.0141633
M_13pcw_AMY.1	-0.0124535	-0.000705272	-0.0158025	-0.0451232	-0.0155826	0.0549866	-0.0237913	-0.00796628	0.0072421	-0.0178439	-0.0321805	-0.0344604	-0.0125366	-0.0154609	-0.00848075	-0.0116269	-0.0305833	-0.0126926	0.00465845	-0.0458284	-0.0147297	-0.0173797	0.0151846	-0.000748699	-0.0257658	-0.00208309	-0.00378187	0.00196502	-0.0485447	-0.0403114	-0.0293709	-0.0277429	0.0157299	0.0137103	0.100614	0.0448581	0.041927	-0.0156986	0.0250736	0.045452	-0.0218974
M_13pcw_ITC.1	-0.0177404	-0.023118	-0.0205665	-0.00127854	-0.0283531	-0.0439306	-0.0418157	-0.0103233	0.00884327	-0.0213429	-0.0529435	-0.0441595	-0.0159401	-0.0283052	-0.0242696	-0.0495167	-0.0463203	-0.0166546	0.00376751	-0.0512306	-0.0151836	-0.0254843	-0.0215669	-0.0163766	-0.0341392	-0.0257666	-0.0238878	0.0194732	-0.0552103	-0.0355927	-0.0341127	-0.0451741	0.00310715	0.0227983	0.0165803	0.0666915	0.0996862	0.070256	-0.0191946	0.0213619	-0.0355675
M_13pcw_HIP.1	-0.000134454	-0.00295198	0.0170843	-0.0248314	0.00323456	0.0477494	-0.0248213	-0.00805604	0.00398355	-0.0152997	-0.0285762	-0.0342916	-0.0098603	-0.018313	-0.0149259	-0.022996	-0.0365958	-0.0118356	0.013776	-0.0418136	-0.011455	-0.0204867	-0.0124019	0.00129829	-0.0262529	-0.0123318	-0.0130797	-0.00288205	-0.049266	-0.044366	-0.0374049	-0.0242599	0.017532	0.0364014	0.0736635	0.0441969	0.0653302	0.0108494	0.0100743	0.0403602	-0.0296461
M_13pcw_IPC.1	-0.0191072	-0.021204	-0.0278173	-0.0317255	-0.0311702	-0.0510794	-0.0356935	-0.00730291	-0.00527647	-0.0214974	-0.0549202	-0.0420746	-0.00886622	-0.0230863	-0.0176512	-0.0217301	-0.0365887	-0.00936197	-0.0061645	-0.0499415	-0.0326937	-0.0243076	-0.0211682	-0.0219769	-0.0326169	-0.0246003	-0.0223718	0.00767709	-0.050527	-0.0129466	-0.0391657	-0.00127161	0.0254445	0.0692249	0.0052482	0.0415371	0.0681471	0.110452	0.029641	0.0440721	-0.0242062
M_13pcw_A1C.1	-0.0180921	-0.0233589	-0.0237928	-0.031203	-0.0315575	-0.0525829	-0.0403621	-0.0102592	-0.00882472	-0.0232762	-0.0574066	-0.0448553	-0.0186224	-0.0276633	-0.0208163	-0.0499458	-0.0466463	-0.0122648	0.0171304	-0.0439618	-0.00787459	-0.0263183	-0.0237096	-0.0202988	-0.0344217	-0.0239525	-0.0224362	0.0271083	-0.0520741	-0.0262	-0.0122803	-0.0308397	0.0162001	0.0278709	0.00970871	0.0746991	0.0922086	0.066513	-0.0199718	0.0231614	-0.0405484
M_13pcw_VFC.1	-0.0196678	-0.0233507	-0.0258269	-0.0272421	-0.0325176	-0.0503045	-0.057643	-0.00906474	-0.0108103	-0.0231731	-0.0555274	-0.0448257	-0.0139428	-0.0287088	-0.0203502	-0.0576344	-0.0499985	-0.00786202	0.00801045	-0.0529509	0.00757447	-0.0276125	-0.0234785	-0.0244156	-0.0358733	-0.0249443	-0.02123	0.0423512	-0.0567198	-0.0384695	-0.0330604	-0.0667278	-0.0093873	0.0115482	0.0221218	0.103302	0.112499	0.0800058	-0.0300913	0.0139035	-0.044984
M_13pcw_STR.1	-0.0165089	-0.0141774	-0.0179517	-0.0104683	-0.0216317	-0.0437756	-0.0430759	5.38693e-05	0.0203737	-0.021108	-0.0470503	-0.0455669	-0.0122121	-0.0228369	-0.0199075	-0.0506827	-0.0452685	-0.0108666	0.03387	-0.0318051	0.0176277	0.00352873	0.223698	-0.0101721	-0.0282719	-0.00141291	-0.00034942	0.00527514	-0.0511305	-0.0458554	-0.0158984	-0.0454894	0.00627096	0.0489176	0.0207186	0.0686776	0.0952417	-0.0192946	-0.0312065	0.00230654	-0.0383168
M_13pcw_OFC.1	-0.0158756	-0.0193866	0.0107699	-0.0238671	-0.0213114	-0.0181959	-0.0641486	-0.0090975	-0.0119661	-0.0230489	-0.0456805	-0.0428039	-0.0149468	-0.0258892	-0.0228526	-0.0562713	-0.0493388	-0.0123736	0.0277915	-0.0474472	0.0300533	-0.0269332	-0.0207229	-0.019883	-0.0331429	-0.0235044	-0.0188082	0.0493294	-0.0567148	-0.0484047	-0.0425089	-0.0792677	-0.0186259	0.0341524	0.0559472	0.120125	0.131849	0.0658629	-0.0341257	0.0119048	-0.0402553
M_13pcw_MFC.1	-0.0131459	-0.0168912	-0.018192	-0.033138	-0.0223769	0.0198543	-0.0635293	-0.0103993	-0.0147909	-0.024102	-0.0402243	-0.0402707	-0.0147323	-0.0254233	-0.0212073	-0.0536625	-0.0470726	-0.013653	0.0123449	-0.0559004	0.0307697	-0.0273928	-0.0204392	-0.0189023	-0.0341185	-0.0236848	-0.0220853	0.0566798	-0.0560203	-0.0477733	-0.0472825	-0.0884825	-0.0295892	0.0115503	0.0994199	0.123523	0.112489	0.0546281	-0.0225902	0.0239992	-0.0426712
M_13pcw_V1C.1	-0.0138979	-0.0158687	-0.0245021	-0.0315275	-0.0224161	-0.0150032	-0.042348	-0.00716994	0.0010435	-0.0138621	-0.0455259	-0.039999	-0.00537844	-0.0208271	-0.00927421	0.00184321	-0.0277877	-0.0162556	-0.00968462	-0.0499791	-0.0280035	-0.0221393	-0.0206696	-0.0184217	-0.0322373	-0.0252123	-0.02327	-0.00328432	-0.0512577	-0.0300962	-0.0512986	-0.00530595	0.021525	0.0155757	0.0402608	0.0370849	0.0517444	0.0824369	0.0555252	0.0490102	-0.0150224
M_13pcw_M1C.1	-0.0184498	-0.020936	-0.0258552	-0.035853	-0.0310012	-0.0489489	-0.0399156	0.000228575	0.00426235	-0.0232615	-0.0545639	-0.0426113	-0.0132413	-0.0233774	-0.0175712	-0.0291802	-0.0380202	-0.0176222	-0.00563489	-0.0519756	-0.0253278	-0.0249519	-0.0216953	-0.0223903	-0.0333249	-0.02445	-0.0216239	0.0107688	-0.0516138	-0.017025	-0.0377502	-0.0150154	0.0190992	0.0157642	0.00777215	0.047854	0.0640512	0.10689	0.0199478	0.0395716	-0.0309027
M_16pcw_VFC	-0.0125146	-0.0131747	-0.0246007	-0.0294324	-0.0180598	-0.033732	0.00815582	0.0262587	-0.00404528	-0.0120743	-0.042002	-0.0371529	-0.00356171	-0.0126762	-2.61251e-05	0.0188418	-0.0205823	-0.00658666	0.0622736	0.0112468	-0.0154341	-0.0129328	-0.00187993	-0.0108132	-0.0158234	0.00150414	0.00288176	-0.0275614	-0.0295882	-0.00776863	0.0503472	0.0815463	0.0979895	0.140303	-0.00940527	0.00737345	0.0652756	0.0186462	0.0379265	0.0345889	-0.0114151
M_16pcw_OFC	-0.0145477	-0.0164812	-0.0262781	-0.043101	-0.0221797	-0.0404994	-0.00307354	0.000618954	-0.0143028	-0.016754	-0.0462641	-0.0391225	-0.00565483	-0.0132636	-0.00109349	0.0275608	-0.0211908	-0.00916417	0.0625473	0.0104607	-0.0193127	-0.0167505	-0.0177225	-0.0174682	-0.0205607	-0.0125722	-0.00797445	-0.0264699	-0.0322398	-0.00906198	0.0290247	0.0880406	0.103061	0.121341	-0.00968872	0.00765978	0.0727525	0.0314188	0.0447741	0.040902	-0.0127114
M_16pcw_STC	-0.00962859	-0.0125417	-0.0207234	0.0205974	-0.0109887	0.000840615	-0.0116156	0.0233254	-0.00677148	-0.0119686	-0.0334816	-0.0340038	0.00205335	-0.0105653	0.00783367	0.0450877	-0.00676841	-0.0105907	0.0639895	-0.00158795	-0.00556249	-0.0130885	-0.000724036	-0.00949463	-0.0199283	-0.00417412	-0.00347757	-0.0217191	-0.037592	-0.0243786	0.0015531	0.0388265	0.0680267	0.209162	0.0192736	0.0176647	0.107485	0.0037907	0.0654027	0.0471763	0.0188391
M_16pcw_DFC	-0.0121482	-0.0140545	-0.021657	-0.0379397	-0.0171009	-0.00226099	-0.0221104	0.0107026	-0.00411842	-0.0136342	-0.035544	-0.0360353	0.0108034	-0.0132676	-0.00113876	0.0313036	-0.0185958	-0.00909485	0.107842	0.0155628	0.00973639	-0.0186116	-0.0126021	-0.0120954	-0.0223633	-0.0130174	-0.00783182	-0.0331137	-0.0417089	-0.0369546	-0.0117039	0.0462457	0.0860262	0.247204	0.0237823	0.0234846	0.135473	0.0147937	0.051853	0.0453339	0.000847522
M_16pcw_IPC	-0.0158659	-0.0165863	-0.0263456	-0.0359704	-0.024652	-0.0294282	-0.014647	0.0114296	-0.00938329	-0.011297	-0.046813	-0.0381664	0.00321451	-0.0144839	-0.0033116	0.0236442	-0.0165499	-0.00778864	0.0169723	-0.024863	-0.0233983	-0.018564	-0.0156585	-0.0167734	-0.0245658	-0.0141699	-0.00962446	-0.00538251	-0.0380151	-0.00443069	0.0252697	0.0358015	0.0646153	0.175832	0.00355066	0.0239515	0.061589	0.0231663	0.0615195	0.0495808	0.00673721
M_16pcw_A1C	-0.0146551	-0.016964	-0.0250919	-0.0364602	-0.0239325	-0.038285	0.000637747	0.0180636	-0.00802697	-0.0109427	-0.0486194	-0.0378156	0.00480703	-0.0123468	0.0052935	0.0558734	-0.00357702	-0.00331886	0.0152352	-0.0170624	-0.0416368	-0.0186369	-0.0157086	-0.0162092	-0.0233758	-0.0107465	-0.0129484	-0.0241441	-0.0359534	-0.00203824	0.0292377	0.0797993	0.0913442	0.10698	-0.0101458	0.000625035	0.0424831	0.0228345	0.0784334	0.0504882	0.0266124
M_16pcw_MFC	-0.0109954	-0.0133941	-0.0194639	-0.0234358	-0.0075234	0.0290291	-0.0236548	0.0645793	0.0119135	-0.0109484	-0.025803	-0.0334607	0.0101639	-0.0115833	0.00336454	0.0624387	-0.011438	-0.00803072	0.117893	0.0196623	0.00712861	-0.0188079	-0.0161917	-0.012402	-0.0237235	-0.0119295	-0.00745768	-0.0449672	-0.0437188	-0.04852	-0.0353449	0.0461228	0.0830178	0.226926	0.0404688	0.0116537	0.146953	-6.54561e-06	0.0643507	0.0523764	0.0111788
M_16pcw_STR	-0.0069393	0.00375755	-0.0191504	-0.0362487	-0.0164035	-0.0120755	-0.00122423	0.0152229	-0.00429049	0.00744108	-0.0374579	-0.0315561	0.0164056	-0.00174855	0.0151335	0.0881414	0.0329962	-0.00879235	-0.02352	-0.0379166	-0.0324237	0.0411651	0.281064	-0.000371894	-0.00879863	0.00740698	0.00713052	0.00938838	-0.0264297	0.0182803	0.0153908	0.0281527	0.0397423	0.0660784	0.0167814	0.0150641	0.0032749	-0.00964276	0.136854	0.0609245	0.0763653
M_16pcw_MD	-0.000480239	-0.00128308	-0.00829406	0.260204	0.0191783	0.00674182	0.011098	0.00769274	-0.00950404	-0.0170177	-0.0124836	-0.0263933	0.0104374	-0.00121	-0.000124997	0.00605308	-0.00394423	-0.00756556	0.0216235	-0.0093046	0.0193317	0.00736757	0.0526455	0.0217851	0.0490183	0.1162	0.306409	0.0153564	-0.0158424	0.00651669	0.0551435	-0.00471669	0.0231815	0.105838	0.00604909	0.0260155	0.0372885	-0.0162489	0.0326747	0.0182673	0.015559
M_16pcw_V1C	-0.0151803	-0.0164393	-0.0273546	-0.0324326	-0.0205096	-0.0152802	-0.0157246	0.00645053	-0.00997948	-0.0111185	-0.0426842	-0.0373755	-0.00314246	-0.0158628	-0.00400217	0.0315706	-0.0221816	-0.00184364	0.0595331	-0.00323801	-0.0205914	-0.0200033	-0.016115	-0.0169468	-0.0250967	-0.0154139	-0.0145853	-0.0254417	-0.0398399	-0.0205658	-0.00763349	0.0653204	0.0847695	0.197896	0.0148236	0.0139388	0.0994424	0.0260818	0.0521682	0.0516832	-0.00441413
M_16pcw_VFC.1	-0.00461667	-0.0151972	0.0452474	-0.0331152	-0.00209393	-0.034538	0.000638135	-0.00996354	-0.0154218	-0.00368855	-0.0436103	-0.0346425	0.016944	-0.0106373	-0.00475597	0.0622864	0.0125143	-0.0143523	-0.0435631	-0.0524718	-0.0662932	-0.0197592	-0.0188266	-0.0144317	-0.02075	-0.0123107	-0.0157353	-0.00746977	-0.0389962	0.0263731	0.0276304	0.0417847	0.0495204	-0.0190291	-0.0170058	-0.0104071	-0.0171466	0.0450177	0.0979748	0.0578013	0.0660424
M_16pcw_STC.1	-0.0066282	-0.017856	0.0219885	-0.0169068	0.000772774	-0.019549	0.00351519	-0.0133669	-0.0215401	-0.0121193	-0.0379424	-0.0354872	0.00607414	-0.0107119	-0.0129627	0.0466817	-0.0122585	-0.0185695	0.00953877	-0.0182015	-0.0534164	-0.0180746	-0.0166454	-0.010954	-0.0226642	-0.0145002	-0.0133909	-0.0251121	-0.0381091	-0.00540088	-0.00388984	0.0884184	0.0842432	-0.0177867	-0.00610888	-0.009721	0.0212945	0.0391091	0.0616409	0.0539688	0.0198025
M_16pcw_IPC.1	-0.0113714	-0.0209275	-0.00304808	-0.0399836	-0.0139862	-0.0405028	-0.00539709	-0.0115018	-0.0229118	-0.00979464	-0.0483134	-0.0376145	-0.00130265	-0.0168593	-0.0114632	0.0131613	-0.018093	-0.0184193	-0.0327131	-0.048474	-0.0528372	-0.0213599	-0.0203146	-0.0172765	-0.0253045	-0.0131596	-0.0158513	0.00913377	-0.0397935	0.0209236	0.0126739	0.0294603	0.0442543	-0.019849	-0.0109178	0.00983213	0.00412777	0.0589486	0.0609701	0.0561035	0.015292
M_16pcw_A1C.1	-0.00654809	-0.0188899	0.0226421	-0.0184878	-0.00899409	-0.0269539	-0.0181048	-0.0102544	-0.0171748	-0.00259223	-0.0451444	-0.0347657	0.00782718	-0.0156138	-0.00785933	0.0298721	0.00153117	-0.0134297	-0.064122	-0.0693377	-0.0595135	-0.0220731	-0.0165001	-0.0134794	-0.0242897	-0.0159271	-0.0183737	0.0235439	-0.0427507	0.0287882	0.0139923	-0.013694	0.0122236	-0.020534	-0.00334285	0.0120063	-0.0120319	0.0482492	0.0919624	0.0627415	0.0564809
M_16pcw_MD.1	-0.00104409	0.00157833	-0.0137861	-0.0362146	-0.00920189	-0.0231101	0.0409578	-0.0110552	-0.0231451	-0.0187128	-0.035694	-0.0345979	-0.00504783	0.00216251	-0.012504	0.00121382	-0.0181531	-0.0194854	-0.00982143	-0.00525936	-0.0514623	-0.00717864	0.0302417	0.0217401	0.0480932	0.27246	0.227366	-0.00794355	-0.0105758	0.024114	0.0818591	0.100029	0.0792729	-0.028777	-0.0227732	-0.0155383	-0.0309882	-0.0167521	0.0111125	0.0207094	-0.0119584
M_16pcw_AMY	-0.00510762	-0.00206147	-0.0167886	0.0137834	0.0035128	0.0416792	0.0142559	-0.0114123	-0.0183114	-0.00447158	-0.0181865	-0.0314208	0.0205654	-0.0105868	-0.0036281	0.0481523	-0.0116176	-0.0112907	0.054795	-0.00964661	-0.0145167	-0.0137226	0.00770587	-0.00407771	-0.0193058	-0.00293297	-0.000826867	-0.0421121	-0.0412459	-0.0483297	-0.0250767	0.0326352	0.0620952	-0.00982852	0.0353531	0.00114902	0.0551691	-0.0187394	0.0514268	0.0356568	0.0419279
M_16pcw_V1C.1	-0.00543939	-0.0125262	0.0207603	-0.00717477	0.00155777	0.00342142	-0.0166489	-0.00330958	-0.0155345	0.00851971	-0.0340351	-0.0311286	0.0233845	-0.0109063	-0.000646345	0.0885987	0.0179446	-0.00987974	-0.0334903	-0.0497799	-0.0616558	-0.02	-0.0182428	-0.0118623	-0.0231205	-0.0181618	-0.0192593	-0.00759854	-0.0428213	0.00562866	-0.0302843	0.0251796	0.0319066	0.0376482	0.0166545	-0.00667875	0.00584749	0.060177	0.114555	0.0697627	0.103392
M_16pcw_ITC	-0.00445448	-0.00778774	0.0220669	-0.0130549	-0.00264351	-0.0166293	0.0121702	-0.00993605	-0.0163197	0.00336169	-0.0393644	-0.031908	0.00957594	-0.00619742	0.00471441	0.0669251	0.0213933	-0.0154822	-0.0421907	-0.0478357	-0.0619613	-0.0135493	0.00605427	0.00396362	-0.0141507	-0.00201567	-0.000934862	-0.00116695	-0.0322082	0.0279561	0.0232706	0.0386643	0.0410649	-0.0169546	-0.00684067	-0.0093798	-0.0117383	0.0162731	0.0958068	0.055641	0.0814919
M_16pcw_CBC	0.920978	0.260841	0.140325	0.046764	0.106372	0.123083	0.0519271	-0.0113805	-0.0292294	-0.0198847	0.031548	-0.00893268	-0.000766293	0.0241775	-0.0134977	-0.00473996	-0.0232678	-0.0144672	0.0456274	0.00855237	-0.0225496	0.00928162	0.02361	0.157023	0.015832	0.0539609	0.0488938	-0.0150584	-0.0209399	-0.0317442	-0.00418047	0.0263566	0.0416248	-0.0180171	0.0449147	-0.00525313	0.0310022	-0.0118831	-0.00852958	0.0377062	-0.0242277
M_16pcw_HIP	0.0271336	0.0200765	0.0106662	-0.0102027	0.00421657	0.013764	0.0192785	-0.0109127	-0.0257056	-0.0115509	-0.0316757	-0.0281541	-0.0018249	-0.00690701	-0.0099342	0.0136011	-0.0123911	-0.0129742	-0.0245975	-0.0428645	-0.0470597	-0.0137554	0.00253109	0.0233427	-0.0133863	0.000723215	-0.00351868	0.0124515	-0.0317314	0.0136506	0.0160254	0.0271199	0.0384141	-0.0191148	0.0106829	0.00823269	-0.00298169	0.0191405	0.0538277	0.0586156	-0.00102615
M_16pcw_STR.1	-0.00576062	-0.00376632	-0.0181724	-0.0134558	-0.00561579	-0.0144478	0.0290399	-0.0077019	-0.0198649	-0.0106487	-0.0353035	-0.032014	0.00930402	-0.00174722	-0.0105238	0.0350344	-0.0019173	-0.0142435	-0.014503	-0.0261706	-0.045209	0.0232993	0.22805	0.00646195	-0.00270187	0.017208	0.0280154	0.00359638	-0.0226921	0.0253328	0.0248493	0.0581143	0.0551404	-0.0220526	0.00146769	0.0010643	-0.00992867	-0.00681142	0.0711213	0.0546075	0.019608
M_16pcw_OFC.1	-0.00418118	-0.0164341	0.0447869	-0.0368552	0.00026555	-0.0132457	0.00658653	-0.00932643	-0.0192123	-0.00619082	-0.0395656	-0.0317351	0.0132121	-0.00883055	-0.0101812	0.0342346	-0.00167868	-0.00984316	-0.0401078	-0.0516572	-0.0619632	-0.0175701	-0.00885236	-0.00640499	-0.0178273	-0.0129303	-0.0128918	0.00620419	-0.0383284	0.0298823	0.0196688	0.0320507	0.040277	-0.000595658	-0.00218292	-0.000931569	-0.0154866	0.0425392	0.079455	0.0706393	0.0346928
M_16pcw_DFC.1	-0.00648789	-0.0189183	0.0254704	-0.0368426	-0.000833651	-0.0142432	0.00502791	-0.00992261	-0.0173585	-0.0139005	-0.0414411	-0.0337705	0.00338345	-0.00869709	-0.0112881	0.0384836	-0.0069034	-0.0175496	-0.0267976	-0.0411385	-0.0634709	-0.0187862	-0.0139233	-0.0136641	-0.0205331	-0.0160967	-0.0133886	-0.00584487	-0.0388201	0.0214641	0.00761577	0.0646649	0.0653091	-0.0174973	-0.00215634	-0.00618911	-0.0109721	0.0536696	0.076316	0.0714719	0.0128858
M_16pcw_M1C	-0.0108642	-0.0206636	-0.0015891	-0.0417887	-0.0188342	-0.0379646	-0.0166954	-0.0100123	-0.0210163	-0.00887257	-0.0501614	-0.0362546	-0.00107691	-0.0142544	-0.0125681	0.0096965	-0.00732718	-0.0144721	-0.0700088	-0.0747865	-0.0544457	-0.0223338	-0.0207791	-0.0181969	-0.024357	-0.0170129	-0.019937	0.0419667	-0.0408286	0.0438957	0.0242829	-0.0313063	0.000187408	-0.0175123	-0.00492556	0.0249085	-0.0167128	0.0722602	0.0801861	0.0645743	0.0369577
M_16pcw_MFC.1	-0.00554024	-0.0146116	0.010713	-0.0358416	-0.00235421	-0.00814235	-0.00558648	-0.00635184	-0.0166368	0.0156293	-0.0385673	-0.0323439	0.0280732	-0.0101545	-0.00255199	0.0735683	0.017017	-0.0126186	-0.0401028	-0.0526793	-0.065652	-0.0190195	-0.0179449	-0.0137811	-0.0216302	-0.0174846	-0.0149091	-0.00735038	-0.0409245	0.017866	-0.00572318	0.0341675	0.038545	-0.0164301	0.00329998	-0.00968122	-0.0127344	0.0445747	0.109202	0.0707314	0.0773291
M_16pcw_S1C	-0.00839485	-0.0201028	0.0242991	-0.0367319	-0.00699338	-0.0336828	-0.00326086	-0.0134736	-0.0212928	-0.0130059	-0.0466466	-0.0367364	-0.00127522	-0.0146958	-0.0135522	0.00618807	-0.01589	-0.0143296	-0.0437292	-0.0557188	-0.0561531	-0.0217715	-0.0208564	-0.0165715	-0.0221783	-0.0150406	-0.0167423	0.0185519	-0.0385529	0.0292683	0.0269241	0.0146916	0.0329388	-0.0167698	-0.00944937	0.0110152	-0.00580102	0.0584359	0.058975	0.0581543	0.0104938
M_16pcw_HIP.1	-0.00206282	-0.00463918	0.019436	0.0197066	0.0127216	0.111213	-0.0120896	-0.0108553	-0.0236786	-0.0171998	-0.0149282	-0.0227506	-0.0063867	-0.0109637	-0.00733272	0.00582391	-0.0198134	-0.0165001	-0.0141277	-0.0563235	-0.0218408	-0.017256	0.0031817	-0.00220352	-0.0235187	-0.0013629	-0.0109308	0.0310452	-0.0467768	-0.0239801	-0.0420419	-0.0303683	0.0115728	0.00680788	0.124077	0.0507029	0.0250041	-0.00951828	0.0687632	0.0928169	-0.0247584
M_16pcw_ITC.1	-0.0140104	-0.0181846	-0.0155471	-0.0427664	-0.0248946	-0.0351131	-0.00023091	-0.0139593	-0.0263608	-0.0221163	-0.0516618	-0.0394647	-0.0176283	-0.0180581	-0.0167827	-0.0407601	-0.0436728	-0.0174124	0.0254782	-0.0218629	-0.0144289	-0.0196615	-0.00623087	-0.0100453	-0.0235969	-0.00668289	-0.00907423	0.0299647	-0.0357305	-0.00111419	0.052264	0.0202327	0.0586498	0.028073	0.00775733	0.0542761	0.0397749	0.021994	-0.0112073	0.036597	-0.0418977
M_16pcw_DFC.2	-0.00580512	-0.0227832	0.0606555	-0.0314445	-0.0146552	-0.0299297	-0.0338537	-0.00754248	-0.0215588	-0.0210301	-0.049693	-0.0389751	-0.00724463	-0.0211885	-0.0197601	-0.0530134	-0.0468027	-0.00372397	0.0126392	-0.0412294	0.00918833	-0.0244937	-0.0163661	-0.0145195	-0.0277907	-0.0160361	-0.0141437	0.0775187	-0.043299	-0.0055757	0.0504471	-0.0491415	0.0126357	0.214473	0.025487	0.108729	0.0575462	0.0403205	-0.0206862	0.034129	-0.0365889
M_16pcw_IPC.2	-0.0135124	-0.0202165	-0.00316249	-0.0331304	-0.0176342	-0.040138	0.0206666	-0.013211	-0.0211608	-0.0206058	-0.04947	-0.0389877	-0.013535	-0.0155635	-0.0157059	-0.0166467	-0.0377245	-0.0168666	0.00312141	-0.0239346	-0.0507259	-0.020002	-0.0138589	-0.0152818	-0.0210187	-0.0130975	-0.0130453	-0.00747061	-0.0346453	0.0135622	0.0490118	0.0901916	0.0975859	0.01525	-0.0101711	0.00644849	0.00890598	0.0337218	0.0165117	0.0494646	-0.0335521
M_16pcw_STC.2	-0.00207806	-0.0189232	0.0867883	-0.00852271	-0.000356378	-0.0251861	0.00537757	-0.0147627	-0.0225101	-0.0205796	-0.0433271	-0.0361908	-0.0131996	-0.0144345	-0.013542	-0.0221754	-0.0336515	-0.0192238	-0.000297701	-0.0348515	-0.0271085	-0.0194724	-0.0115381	-0.00949792	-0.0205986	-0.00958607	-0.00957604	0.0184653	-0.0365615	0.00518568	0.0479369	0.0271329	0.0603823	-0.00447236	0.00679048	0.0387089	0.0216374	0.0251331	0.025048	0.047712	-0.0308758
M_16pcw_V1C.2	0.000296622	-0.0238428	0.144177	-0.0057741	0.0114651	-0.0153098	-0.0266196	-0.0114379	-0.0217012	-0.0221055	-0.0395966	-0.0374481	-0.0174254	-0.0212425	-0.0208621	-0.051353	-0.0466309	-0.0166905	0.0124581	-0.040097	0.0034354	-0.0240767	-0.0162262	-0.0143846	-0.024915	-0.0147981	-0.0130529	0.0569025	-0.0435943	-0.0131025	0.0233215	-0.0392398	0.0153697	0.0309809	0.0273391	0.0890423	0.0767525	0.026091	-0.0253585	0.0303094	-0.0416627
M_16pcw_MD.2	-0.00642436	-0.0076793	-0.0139634	-0.0248534	-0.0205149	-0.020706	-0.0184713	-0.0138944	-0.0285726	-0.0228125	-0.0380695	-0.0360361	-0.0153452	-0.00939253	-0.020407	-0.0539773	-0.0415873	-0.0178172	0.00734696	-0.0147678	0.033318	-0.0116031	0.0351814	0.0132728	0.0361666	0.253436	0.357667	0.0950698	-0.0146814	0.00412668	0.108464	-0.0386328	0.00704896	-0.0117597	0.0129274	0.0940795	-0.00422342	-0.0113679	-0.0408793	0.00174654	-0.0473995
M_16pcw_STR.2	-0.00894088	-0.00461361	-0.015567	-0.0066708	-0.0136262	-0.0153544	0.0158202	-0.0110533	-0.0191828	-0.018915	-0.0378478	-0.0330216	-0.0109211	-0.00850975	-0.0142672	-0.0306898	-0.0312784	-0.0154907	-0.0126479	-0.0378905	-0.00328254	0.0374306	0.280494	0.00425571	-0.00819191	0.0180912	0.0264064	0.0587671	-0.0227633	0.0237521	0.0380626	-0.00539193	0.0239252	-0.00596348	0.0210201	0.0633122	0.00345982	-0.00437694	0.0208793	0.0422699	-0.0301409
M_16pcw_M1C.S1C	-0.00458392	-0.0183177	0.0541067	-0.0384358	-0.00726033	-0.0325532	-0.00182343	-0.0148616	-0.0222744	-0.0228613	-0.0464023	-0.0367079	-0.0145481	-0.015422	-0.0146564	-0.0263254	-0.0365834	-0.0108461	-0.00348308	-0.0361693	-0.0249567	-0.0201058	-0.0163165	-0.0132072	-0.0225172	-0.0127285	-0.0109188	0.0284268	-0.035881	0.00412671	0.0515942	0.0286699	0.0621758	-0.00335081	0.00499912	0.0469483	0.00454224	0.0364022	0.0209929	0.0458222	-0.0353616
M_16pcw_A1C.2	-0.00985507	-0.0213675	0.0247691	-0.0295201	-0.0129922	-0.0379557	-0.00262859	-0.0144408	-0.0198477	-0.0224764	-0.0509776	-0.0390269	-0.0144813	-0.0206653	-0.0183199	-0.0398331	-0.041528	-0.0138156	-0.00430354	-0.0412663	-0.0227157	-0.0230464	-0.0168009	-0.015279	-0.0251226	-0.0113743	-0.013608	0.036046	-0.0387874	0.00327937	0.0598155	0.00457772	0.0445884	0.00370903	0.00465926	0.0565857	0.0301975	0.0279842	0.00177231	0.0398902	-0.0370864
M_16pcw_VFC.2	-0.0050132	-0.0204568	0.0676088	-0.0267616	-0.00200521	-0.0318259	0.00379491	-0.0152469	-0.0209732	-0.0219547	-0.0451193	-0.0372461	-0.0116569	-0.0147899	-0.0151808	-0.0284913	-0.0396046	-0.0150133	0.00355724	-0.0331791	-0.0307932	-0.0197609	-0.0135024	-0.012588	-0.0214982	-0.0121387	-0.0123605	0.0170077	-0.0377276	0.00743322	0.0596145	0.041476	0.0727519	0.00395264	0.00211682	0.0385098	0.00586311	0.0323703	0.0118441	0.0472732	-0.0373638
M_16pcw_AMY.1	-0.00825559	-0.00620666	-0.0178158	-0.00166715	-0.016151	0.00214689	0.00822432	-0.0108142	-0.021641	-0.0166573	-0.0382421	-0.0311032	-0.0066272	-0.010282	-0.0114591	-0.00903838	-0.018243	-0.0142212	-0.0247959	-0.0513694	-0.0112169	0.00159125	0.0880508	0.00269413	-0.014177	0.00800862	0.00888791	0.0463588	-0.0307089	0.011924	0.0355973	-0.0167887	0.0204296	0.00542495	0.032922	0.0561466	0.0100826	0.00685744	0.0494054	0.0520121	-0.0237609
M_16pcw_MFC.2	0.00908007	0.0141203	0.116347	0.00750648	0.0215272	0.00366534	-0.00271333	-0.0138378	-0.0185162	-0.0175152	-0.0181736	-0.0331951	-0.0133507	-0.00842075	-0.0163108	-0.0450649	-0.0409089	-0.0075614	0.0451379	-0.00194428	0.0321708	-0.0114971	0.0110942	0.00863179	0.0126635	0.151233	0.122312	0.0435566	-0.0265703	-0.0199821	0.0541764	-0.0155112	0.0290677	0.0011584	0.0179528	0.0703709	0.0278384	-0.00322823	-0.0313688	0.00597768	-0.0403741
F_17pcw_STR	0.00355072	0.0665284	-0.00764801	-0.00516553	-0.00112911	-0.00185863	0.0421987	-0.000889548	-0.0018151	0.0120828	-0.0126074	-0.0275594	0.00901471	0.00464321	0.00554383	0.0500894	0.00770595	-0.0034835	0.0601746	0.0279541	0.0143463	0.0536265	0.15364	0.018845	0.0117485	0.0392608	0.0932453	-0.0417965	-0.0116876	-0.0283906	0.0281997	0.0800568	0.0760342	0.00444197	-0.00300589	0.00142458	0.029623	-0.0193401	0.0594325	0.0074361	0.0387525
F_17pcw_STC	-0.0103617	-0.00849291	-0.0255561	-0.044433	-0.02222	-0.0258403	-0.0144472	0.00209746	0.0121242	0.039997	-0.0408017	-0.0337287	0.0321982	-0.0088984	0.0335537	0.145764	0.0545406	-0.0123187	-0.0231277	-0.0386476	-0.0471279	-0.016946	-0.012058	-0.0155408	-0.0214576	-0.0111094	-0.00588737	-0.0388308	-0.039338	-0.0189963	0.0177355	0.0480665	0.0631433	0.00215087	-0.00401708	-0.00909326	0.00884701	0.00100142	0.173626	0.0393947	0.15083
F_17pcw_MD	0.00144655	0.0654679	-0.00852148	-0.00888921	-0.00661748	-0.000379554	0.00969151	-0.00667293	-0.00197733	-0.00383964	-0.0171793	-0.029734	-0.00525066	0.000576925	-0.00223311	-0.0024391	-0.0148732	-0.00871782	0.023884	0.0102553	0.0220648	0.000509045	0.0309111	0.0271084	0.0495456	0.198037	0.367706	0.00107708	-0.0154554	-0.0219838	0.0627024	0.0262981	0.0475211	-0.0115897	-0.00191079	0.0270532	-0.00284661	-0.0229438	0.0143049	-0.00611034	-0.00965951
F_17pcw_A1C	-0.0120407	-0.0115835	-0.0256375	-0.0495097	-0.026529	-0.0380585	-0.00295178	-0.0061339	-0.0115839	-0.00462891	-0.0495007	-0.0370088	0.00111082	-0.0120918	-0.00195135	0.0538638	0.00420885	-0.00640115	-0.0103516	-0.0326235	-0.0227961	-0.0166462	-0.0109992	-0.0144759	-0.0212937	-0.0108433	-0.00443726	1.32032e-05	-0.033591	-0.00271556	0.0675667	0.0392186	0.0708777	0.0296269	-0.00055327	0.0314162	0.0234086	0.0162287	0.100064	0.0384859	0.0265361
F_17pcw_HIP	0.0102102	0.129093	0.0169197	-0.00793644	0.0159106	0.0161854	0.049786	-0.00747007	-0.0180941	-0.00948933	-0.0140629	-0.0277541	-0.00147378	0.000322082	0.00502403	0.0472478	-0.00423669	-0.0122509	0.0729984	0.037749	-0.0131398	0.00100544	0.0143938	0.0100746	0.002867	0.00521387	0.0246156	-0.0444072	-0.0158071	-0.0218652	0.0389366	0.125416	0.116908	-0.00126409	-0.00153951	-0.00717997	0.0311787	-0.00719439	0.0430529	0.0246139	-0.0141283
F_17pcw_DFC	-0.00968553	-0.0110643	-0.0231773	-0.05352	-0.0212896	-0.0309602	0.0173786	-0.00734638	-0.0151137	-0.00609221	-0.0455686	-0.034601	-0.00267275	-0.0050899	0.00473461	0.0775619	0.00909152	-0.0113001	0.0215229	-0.00550948	-0.0364638	-0.0156528	-0.00877344	-0.0146809	-0.0178509	-0.00547703	-0.0053111	-0.0258326	-0.0286794	-0.00227426	0.0673288	0.107093	0.115527	0.0157868	-0.00883833	0.0024627	0.0144933	0.0148207	0.0997249	0.0496649	0.00459344
F_17pcw_VFC	-0.00930629	-0.010322	-0.0213054	-0.0443296	-0.0161253	-0.0103397	0.0158024	-0.00830218	-0.0162584	-0.0145575	-0.0383425	-0.0334727	-0.00242861	-0.00460009	0.0046277	0.0770574	0.000882072	-0.0136016	0.0269995	-0.00351621	-0.0368288	-0.0139515	-0.00664278	-0.01157	-0.0165015	-0.00146605	-0.00491151	-0.029461	-0.0299831	-0.00351918	0.0467773	0.106082	0.110657	-0.00434896	0.00355427	-0.00210849	0.0198303	0.00991403	0.0927771	0.0547376	-0.00809805
F_17pcw_IPC	-0.0143617	-0.0145788	-0.0281478	-0.0554475	-0.0317388	-0.0416395	-0.0173599	0.0291755	-0.00674987	-0.00865573	-0.0534522	-0.0386522	-0.00631882	-0.0174735	0.000197643	0.0127458	-0.00699057	-0.00554926	-0.041912	-0.0567923	-0.0176717	-0.0183426	-0.0145324	-0.0179107	-0.0229262	-0.0134655	-0.00722074	0.0386501	-0.0350466	0.0192845	0.0757958	-0.0154422	0.0276347	0.0752761	0.00126085	0.0542292	0.0102831	0.0266208	0.080591	0.0415441	0.00734457
F_17pcw_M1C.S1C	-0.012991	-0.0105987	-0.0265899	-0.055095	-0.0257504	-0.0407024	-0.00401082	-0.00286636	-0.00784401	-0.00646769	-0.0484009	-0.0372005	-0.00214323	-0.0116384	-0.00246095	0.0291688	-0.00985551	-0.00670311	0.00470146	-0.0184814	-0.0175508	-0.0141391	-0.0118008	-0.0158491	-0.0188838	-0.00747054	0.00143127	0.00175371	-0.0284847	0.00501581	0.0734847	0.0518507	0.0778395	0.00653031	-0.00554459	0.0280443	0.0129078	0.019218	0.0697689	0.0350161	-0.00143442
F_17pcw_V1C	-0.0122126	-0.0112197	-0.0233726	-0.0389138	-0.0165893	-0.0100556	0.00221077	-0.00410543	-0.0129688	-0.00311203	-0.0410335	-0.0321255	0.00680134	-0.00567386	0.0117297	0.112424	0.0163603	-0.0119325	0.0187785	-0.0120305	-0.0403522	-0.0173524	-0.0121217	-0.0139575	-0.0215575	-0.0102944	-0.0112026	-0.0279593	-0.0337573	-0.00384237	0.0179086	0.0954483	0.0994277	0.00181221	0.00981453	-0.00113265	0.0256464	0.0185446	0.129207	0.0643638	0.0205295
F_17pcw_CBC	0.0208043	0.0387013	0.0180293	0.0313542	0.0108856	0.0552704	0.0238396	6.66567e-05	-0.00324616	-0.00563203	-0.00745233	-0.0203005	0.0226512	0.0330537	0.00341051	0.0404394	0.00257648	-0.00585793	0.0154606	-0.0139402	0.00374724	-0.00188583	0.0176396	0.269062	0.00811157	0.0346482	0.0452952	0.00778485	-0.0234815	-0.0170408	0.0186922	0.0145503	0.0372437	0.0389531	0.0449454	0.0323834	0.0237066	-0.0102466	0.0699937	0.0412727	0.0098177
F_17pcw_OFC	-0.00979161	-0.00787548	-0.0231255	-0.0477089	-0.0235192	-0.0162539	-0.00646536	-0.00384463	-0.0113254	0.000113587	-0.0433404	-0.0342056	-0.00137267	-0.00703348	0.00274117	0.0593775	0.012444	-0.00851146	-0.0147664	-0.0372215	-0.0188115	-0.0130188	0.0105589	-0.0127088	-0.0175782	-0.0062824	-0.00356358	0.0101698	-0.0328822	-0.00236285	0.0734185	0.0221761	0.0560601	0.000986803	0.0135311	0.0366663	0.00788313	0.0089092	0.109302	0.0485172	0.0157284
F_17pcw_AMY	-0.00583589	-0.00178787	-0.0187159	-0.030147	-0.0123087	0.0406961	-0.0112707	-0.00427334	-0.00985826	0.00229872	-0.0270227	-0.0272814	0.00689678	-0.00617357	0.0133375	0.105236	0.0195705	-0.00721059	0.00168117	-0.0342344	-0.0204433	-0.0099152	0.016769	-0.00365833	-0.0230221	-0.00650822	-0.00704293	-0.0107133	-0.0411871	-0.0269909	-0.00535958	0.0211388	0.0549949	0.00445444	0.0599058	0.0267034	0.0347843	-0.00755235	0.137299	0.0641829	0.0241707
F_17pcw_MFC	-0.0109389	-0.00940288	-0.0237561	-0.0539375	-0.024492	-0.032824	0.00291632	-0.00232509	-0.00850469	-0.00804829	-0.0464738	-0.0354461	-0.00266849	-0.00955997	0.00200279	0.0379845	0.00285536	-0.00489502	-0.00906092	-0.0299219	-0.02136	-0.0141308	-0.00979278	-0.0121748	-0.017814	-0.00904827	-0.00325195	0.00503087	-0.0300899	0.00475998	0.0690461	0.0401027	0.0692588	-0.000580947	-0.000446536	0.030083	0.00653529	0.019717	0.0838108	0.0386512	0.0022225
F_19pcw_STC	-0.00966349	-0.00856979	-0.0248234	-0.0467992	-0.0248652	-0.0450419	-0.0118537	0.0241437	0.0521965	0.061567	-0.0396832	-0.0395791	0.0190408	-0.0114911	0.0229614	0.0792613	0.0142852	-0.00193096	0.0554386	0.00225098	-0.0105226	-0.0163542	-0.00834903	-0.0126675	-0.0200644	-0.0071776	0.0214464	-0.0687955	-0.0412807	-0.0470134	0.0258809	0.0676403	0.0996625	0.0249155	-0.0191659	-0.00809635	0.0624705	-0.0138386	0.0865605	0.000133894	0.108008
F_19pcw_IPC	-0.0135954	-0.00974268	-0.0270134	-0.0495441	-0.0273975	-0.0536352	-0.0333596	0.0559245	0.11395	0.123316	-0.0375487	-0.0426307	0.0168463	-0.0185765	0.00847258	0.0548518	-0.00298578	0.00219422	0.0846641	0.0123852	0.00936771	-0.0202036	-0.0174722	-0.0169828	-0.0252849	-0.0188725	0.00709522	-0.0858298	-0.0507115	-0.0647951	0.00673703	0.0386223	0.0897832	0.0478221	-0.0276088	-0.0121111	0.102696	-0.0183549	0.0549907	-0.0216172	0.090693
F_19pcw_M1C.S1C	-0.0123811	-0.0105881	-0.0265911	-0.0526025	-0.0265135	-0.0525008	-0.0301235	0.00987582	0.0444733	0.0795875	-0.0376612	-0.0418496	0.00354605	-0.0171188	0.00153897	0.038639	-0.0196547	0.0126961	0.120564	0.0362316	0.0286081	-0.0176241	-0.0182611	-0.0189956	-0.022339	-0.0177363	0.0117872	-0.0767596	-0.0452339	-0.0634112	0.0190231	0.0587473	0.110033	0.018571	-0.0231297	0.00228796	0.108787	-0.0134655	0.0393619	-0.0165756	0.0440372
F_19pcw_MFC	-0.00782387	0.00351152	-0.0211405	-0.0129478	-0.0113788	-0.0157756	0.00355279	-0.00831708	-0.0120692	-0.0036834	-0.030445	-0.0349855	0.00987999	-0.00837473	0.00910953	0.0673451	-0.00131479	-0.00272221	0.087404	0.0239936	0.00216507	-0.0145939	-0.0111492	-0.0104402	-0.0183039	-0.0103662	0.0030168	-0.0506528	-0.0341317	-0.0413515	0.0294749	0.080155	0.115206	0.0215553	-0.000403245	0.00600265	0.0700872	-0.00342763	0.0667677	0.0202054	0.0175551
F_19pcw_V1C	-0.0143957	-0.0152814	-0.0261701	-0.0468551	-0.0258636	-0.0534607	-0.0310768	0.0503623	0.105196	0.0629593	-0.0386186	-0.04357	0.00395397	-0.0188062	-0.003459	0.0510588	-0.0207386	0.00509542	0.125258	0.0357428	0.00811815	-0.019414	-0.0188804	-0.019862	-0.0261647	-0.0208162	0.00192874	-0.0952695	-0.0502658	-0.0693001	-0.0102544	0.0799351	0.120656	0.026353	-0.0267522	-0.0174153	0.125646	-0.0184962	0.0386933	-0.0173759	0.0436646
F_19pcw_HIP	0.0296384	0.376275	0.0212899	0.0777876	0.0257345	0.0407818	0.0170284	0.028335	0.0314868	0.0429565	0.00822653	-0.0183913	0.022875	0.000499375	0.0256855	0.0673041	0.0357479	-0.000304906	0.0413805	-0.00369941	0.0114662	5.21712e-05	0.0087727	0.0102703	-0.00221985	-0.00283191	0.0357107	-0.0464807	-0.0301865	-0.0397231	0.00256902	0.026505	0.0453738	0.0377322	0.0111251	0.000944885	0.0400645	-0.0175683	0.0722908	0.00735917	0.0978106
F_19pcw_A1C	-0.00993239	-0.0099177	-0.023987	-0.0352042	-0.0248823	-0.0456885	-0.0140105	0.0556357	0.0529467	0.0662726	-0.0407225	-0.0388416	0.0209657	-0.0121494	0.016978	0.0824949	0.018251	-0.00497095	0.0433944	-0.00925117	-0.0102484	-0.0168296	-0.0123893	-0.0156954	-0.0219159	-0.0139001	0.00405542	-0.0634347	-0.0427257	-0.0436192	0.0283385	0.0524101	0.0903652	0.0495936	-0.0179097	-0.00209162	0.0661824	-0.00918384	0.0987108	0.00447316	0.106913
F_19pcw_MD	-0.00103152	0.00121851	-0.00739643	0.0304052	-0.00418953	-0.0183949	0.00738128	0.000742787	0.0217825	0.0664921	-0.0159741	-0.0319037	0.0138791	0.00130893	0.0117104	0.0344212	0.0140221	0.00381273	0.0490934	0.0195321	0.00979895	0.00127315	0.020632	0.0289385	0.0535038	0.115995	0.44928	-0.0547341	-0.0246718	-0.040524	0.0337035	0.0483506	0.062131	0.000777086	-0.0173515	-0.0102356	0.0186415	-0.0306125	0.0356602	-0.0179316	0.0668007
F_19pcw_VFC	-0.0108979	-0.0097542	-0.025424	-0.0518997	-0.0220775	-0.0396682	0.0116914	-0.0101695	-0.0154872	-0.00554357	-0.0442146	-0.0374268	0.00210768	-0.00857252	0.00488149	0.0644937	-0.00114592	-0.0128775	0.0501799	0.0150982	-0.0272564	-0.0144377	-0.0101002	-0.0156425	-0.0163617	-0.00612294	-0.000632783	-0.0378293	-0.0277183	-0.0124796	0.0662574	0.117317	0.126055	0.0016823	-0.0158203	-0.00277793	0.0304386	0.00773296	0.0751609	0.0333374	0.00865557
F_19pcw_STR	0.00240981	0.0595949	-0.0113832	0.0038682	-0.00257618	0.0105917	0.00872222	0.0254028	0.033103	0.0366201	-0.0149529	-0.0284824	0.0227216	0.000366342	0.0216504	0.0837363	0.0141721	0.00542139	0.078147	0.019435	0.00301861	0.026209	0.16281	0.0110697	-0.00389924	0.0254891	0.0692482	-0.0551283	-0.0321765	-0.045451	-0.00552626	0.0599884	0.0859517	0.0717602	0.0286333	0.00384238	0.0454438	-0.0249505	0.0783843	0.0193549	0.0611351
F_19pcw_DFC	-0.0124879	-0.0119047	-0.024163	-0.0503881	-0.0238113	-0.0384065	-0.00634463	-0.00326946	-0.00768455	-0.00584073	-0.0424752	-0.0378798	0.00858593	-0.0111633	0.00685929	0.0580632	-0.00626322	-0.00879527	0.0869547	0.019437	-0.00362167	-0.0158743	-0.0130767	-0.0157009	-0.0200536	-0.0109733	-0.000975831	-0.0471251	-0.036542	-0.0363317	0.0420018	0.0832175	0.121778	0.0500262	-0.00803805	0.0111788	0.0677379	-0.00389932	0.0665129	0.0230313	0.00820062
F_21pcw_CBC	0.00484675	0.0107839	-0.0017802	-0.00909321	-0.00413613	0.0379109	-5.96716e-05	0.0421763	0.00648884	0.0166833	-0.014971	-0.0206489	0.0646029	0.0385043	0.0356661	0.16367	0.096096	0.00756837	-0.0507105	-0.0541732	-0.0299153	-0.00529639	0.0272183	0.308106	0.0044755	0.0208325	0.0242596	0.00166975	-0.0275394	-0.00481234	0.00992376	-0.0220343	0.000764973	0.0956544	0.026651	0.00315972	-0.00671171	-0.0108648	0.174264	0.0453891	0.145368
F_21pcw_ITC	-0.00817914	-0.0029513	-0.0212742	-0.0342565	-0.0169566	-0.0292928	0.0258255	0.097098	0.00770962	0.0278261	-0.038202	-0.0333868	0.0155216	-0.00672946	0.014975	0.124981	0.0437769	-0.00645477	-0.0168865	-0.0353419	-0.0421832	-0.012759	0.00307275	-0.0074582	-0.0166883	0.000858659	0.0131334	-0.0381139	-0.0294989	-0.00745545	0.0519762	0.0404257	0.0638852	0.305666	-0.0145394	-0.014818	0.0173019	-0.000439384	0.140852	0.0300725	0.0764977
M_21pcw_MFC	-0.0100419	-0.0117313	-0.022222	-0.0450006	-0.0217211	-0.0390486	0.0259424	-0.0105243	-0.0203058	-0.0207496	-0.0435224	-0.0366035	-0.0118214	-0.0113103	-0.0100764	-0.0134291	-0.0284891	-0.0166157	-0.0129626	-0.0214236	-0.0319408	-0.010314	-0.00984376	-0.0132818	-0.00901857	-0.000659584	0.00749813	0.0172822	-0.0156509	0.0417034	0.133541	0.0616036	0.0686236	0.0171077	-0.0119802	0.0171286	-0.0175338	0.0199943	0.01641	0.0266931	-0.0291912
M_21pcw_M1C	-0.0116226	-0.0138114	-0.0226201	-0.0456407	-0.021223	-0.0269469	0.018741	-1.58142e-07	-0.0114208	-0.0167459	-0.0414498	-0.0356646	-0.00755409	-0.0112463	-0.00671777	0.0025475	-0.0187809	-0.00814387	-0.00828444	-0.0338776	-0.0245725	-0.0165017	-0.00568754	-0.0155838	-0.0176519	-0.00625822	-0.00462035	0.013966	-0.0310147	0.0138771	0.112774	0.0315639	0.0624618	0.0277419	-0.00197439	0.0305932	0.0113243	0.012273	0.0414408	0.037802	-0.0225661
M_21pcw_STR	-0.00695452	0.00975716	-0.0185105	-0.0173589	-0.00654194	-0.0136836	0.0635586	0.00328724	-0.0196498	-0.00675202	-0.029502	-0.0306317	-0.00674436	0.000987588	-0.00614925	0.00561813	-0.0129297	-0.01553	0.00775698	-0.00883237	-0.0211649	0.0967966	0.325662	0.00134459	0.002558	0.0147265	0.0249388	0.0044407	-0.0109713	0.0230827	0.0487541	0.0681792	0.0692916	0.0254299	0.0029448	0.0150502	-0.00333034	-0.00818206	0.043199	0.0359919	-0.0131256
M_21pcw_HIP	0.00631426	0.125303	-0.00391828	0.0193721	0.00229595	0.0235801	0.043709	-0.00986132	-0.0230011	-0.0180185	-0.0161306	-0.0259419	-0.00681929	-0.00326651	-0.00486698	-0.00446028	-0.013585	-0.0123805	-0.00804886	-0.0211088	-0.0160382	-0.000709595	0.0191383	0.0108071	0.00357944	0.00787263	0.0219359	0.0229608	-0.0127649	0.0268355	0.0640854	0.0341189	0.0393162	-0.0176596	0.0100945	0.0196332	-0.0131215	0.00612916	0.0297238	0.0316848	-0.0287292
M_21pcw_STC	-0.011629	-0.00904357	-0.0241669	-0.0415482	-0.0205977	-0.0389946	0.0372308	-0.0088249	-0.0169102	-0.0165808	-0.0434542	-0.0369252	-0.0116974	-0.011122	-0.007986	0.00633851	-0.0195232	-0.0141879	0.00519866	-0.0166069	-0.0262124	-0.0120299	-0.00431929	-0.0124806	-0.0135401	-0.00111749	0.00599748	-0.00430202	-0.0227909	0.0155353	0.129355	0.0605902	0.0823219	-0.00153778	-0.0122159	0.0139355	0.00739434	0.0177283	0.0363442	0.0269971	-0.0226526
M_21pcw_ITC	-0.0110735	-0.0108148	-0.0245761	-0.0502058	-0.0257248	-0.0403898	0.018412	-0.0132115	-0.0222634	-0.0218184	-0.0484076	-0.0373966	-0.0131877	-0.0133351	-0.0103434	-0.00528612	-0.0236164	-0.0128409	-0.0254106	-0.0348016	-0.0325852	-0.0131027	-0.00677606	-0.016443	-0.0132844	0.000950176	0.00305822	0.0305266	-0.0219708	0.0396342	0.152131	0.0404144	0.0640367	-0.00920856	-0.00823779	0.0309473	-0.0167827	0.0219629	0.0344962	0.035795	-0.0298281
M_21pcw_AMY	-0.00255797	0.0303292	-0.00538679	0.0221505	-0.00558508	0.00433721	0.0297894	-0.00642836	-0.0190837	-0.017913	-0.0293154	-0.028955	-0.00466669	-0.0073721	-0.00862822	0.00475909	-0.0132249	-0.0123165	-0.0171303	-0.0350099	-0.0222126	-0.00816499	0.00797875	0.0044931	-0.0103581	0.00791455	0.00916456	0.0253816	-0.0219829	0.022779	0.0865398	0.01901	0.0417274	0.0200965	0.0110455	0.0277719	0.00252204	0.00832883	0.0485036	0.0427074	-0.0190246
M_21pcw_VFC	0.00381407	0.0894049	-0.0143467	0.101536	0.00202597	0.0317637	0.0375446	-0.0106968	-0.0201437	-0.0159443	-0.0196917	-0.0256644	-0.00753033	-0.00668215	-0.00735405	0.00211801	-0.0139349	-0.0157324	-0.0172378	-0.0357807	-0.0249572	-0.00624501	0.00946891	0.00459591	-0.00814114	0.00845711	0.00899818	0.0217338	-0.0238323	0.0192422	0.0576425	0.0202368	0.0383775	-0.00347074	0.021277	0.0236871	-0.00270827	0.00891606	0.0445774	0.0457268	-0.0217741
M_21pcw_OFC	-0.0105878	-0.0110101	-0.0211692	-0.0411093	-0.0208109	-0.0399578	0.020039	0.00623498	-0.0167643	-0.0162283	-0.041346	-0.0374571	-0.00688618	-0.0133257	-0.00345161	-0.008464	-0.0284329	-0.00189243	0.00635506	-0.0140695	-0.0160789	-0.0123351	-0.0078506	-0.0116597	-0.0125803	-0.00408713	0.00627165	0.0036005	-0.0203248	0.0106901	0.12398	0.0526862	0.0759319	0.419679	-0.00907684	0.0238008	0.0066802	0.0119989	0.0165171	0.0198487	-0.0215369
M_21pcw_V1C	-0.0139427	-0.0159048	-0.0226953	-0.0472168	-0.0234874	-0.0383806	0.0130765	-0.0111641	-0.0182243	-0.0175512	-0.0479088	-0.0372821	-0.0102173	-0.0135903	-0.00721109	0.0160975	-0.0136441	-0.0171165	-0.00586317	-0.024283	-0.0315133	-0.015081	-0.00845202	-0.0159859	-0.017458	-0.00960193	-0.00113514	0.00771761	-0.0270233	0.0187523	0.10396	0.0548441	0.0753389	-0.0142972	-0.00817714	0.0189365	0.00191528	0.016861	0.051706	0.0398439	-0.0205404
M_21pcw_S1C	-0.0108103	-0.0126431	-0.0253308	-0.0501204	-0.0246483	-0.0385838	0.0190203	-0.0116021	-0.0223875	-0.0226592	-0.0471286	-0.0375212	-0.0131892	-0.013449	-0.0155151	-0.0104401	-0.0279265	-0.0120496	-0.0142496	-0.0290379	-0.0271605	-0.0148385	-0.00702374	-0.0163039	-0.0137877	0.00301487	0.00238649	0.023679	-0.0230664	0.0248587	0.156466	0.0419698	0.0695761	-0.0126819	-0.0075376	0.032729	-0.00818525	0.0198454	0.027044	0.0326395	-0.0315943
M_21pcw_CBC	0.01248	0.00680501	-0.00059916	0.0207585	0.00926031	0.0874614	0.0460995	-0.00852048	-0.0189666	-0.0136306	-0.00417958	-0.0157426	0.00988629	0.0387614	0.00469495	0.0371346	-3.72503e-05	-0.0151179	0.00770548	-0.0223656	-0.0126713	-0.00416605	0.018678	0.354468	0.0037055	0.027609	0.0249156	0.0165178	-0.0234526	-0.00581923	0.0125635	0.0174845	0.0334849	-0.00774944	0.0645886	0.025709	0.00811467	-0.00718524	0.0638051	0.0620438	-0.0117956
M_21pcw_IPC	-0.0116199	-0.0148328	-0.0242906	-0.0519988	-0.0242789	-0.0409735	0.0255425	-0.00923237	-0.0196397	-0.0197889	-0.0468148	-0.0382372	-0.0144474	-0.0144241	-0.0146069	-0.0253468	-0.0350578	-0.0132501	0.00275402	-0.0202491	-0.0270392	-0.0152284	-0.010129	-0.012615	-0.0160785	-0.00238322	-0.000605669	0.0114369	-0.0247995	0.0193748	0.118945	0.0521343	0.0768944	0.0264534	-0.00989703	0.0261762	0.00296599	0.0184625	0.00604874	0.0288705	-0.038436
M_21pcw_DFC	-0.00996604	-0.0104225	-0.0194786	0.00197923	-0.0101274	-0.0257982	0.0378852	-0.00975506	-0.0168356	-0.0110087	-0.0329631	-0.0349773	-0.0113289	-0.0108436	-0.00510916	0.0123107	-0.0192689	-0.0121212	0.0198517	-0.00788053	-0.0205637	-0.0120499	-0.00920592	-0.0133117	-0.0146855	-0.00635454	0.00537191	-0.0157407	-0.0258389	-0.00382766	0.0926665	0.0671307	0.0855841	0.00977107	-0.00781267	0.0116485	0.0221076	0.00679804	0.0308343	0.0239266	-0.0184438
M_24pcw_HIP	0.0070762	0.0967603	0.0080383	0.0852674	0.0254595	0.0550908	0.0560312	-0.0149962	-0.034959	-0.0198287	-0.00382651	-0.0260595	-0.0101341	-0.0110566	-0.0159605	-0.0408376	-0.0388461	-0.0129262	0.024005	-0.014669	0.0216557	-0.00711286	0.0146171	0.011428	-0.00389329	0.00793953	0.0117177	0.0375355	-0.0200639	-0.0239368	0.047732	-0.0284377	0.00555702	-0.010952	0.0374636	0.0493135	0.0377704	-0.0070707	-0.022444	0.0125095	-0.0452016
M_24pcw_AMY	-0.00554017	-0.00915668	-0.00848092	0.0460675	0.0181212	0.0911361	0.0251683	-0.0119918	-0.0334567	-0.020266	-0.00633879	-0.0225478	-0.00982775	-0.0110092	-0.00991221	0.00631169	-0.0272643	-0.0121678	0.0190157	-0.032187	-0.0137558	-0.0153732	-0.00286853	0.000782555	-0.0219747	-0.00358514	-0.0114438	0.0122318	-0.0418237	-0.0383625	-0.0311907	-0.0114023	0.0258423	0.00146723	0.0570865	0.0360553	0.0559503	-0.011611	0.0394972	0.0577608	-0.0300634
M_24pcw_DFC	-0.00694744	-0.0184916	0.0224893	-0.00775002	0.00607628	-0.0291536	0.0184462	-0.012795	-0.0315255	-0.0173127	-0.0380654	-0.0366026	-0.00916721	-0.0163844	-0.0194845	-0.0323183	-0.037167	-0.0134913	0.00121057	-0.0278092	-0.012301	-0.0177257	-0.0117016	-0.0118875	-0.0160312	-0.00616097	-0.00606758	0.0327244	-0.029434	0.00110886	0.119451	-0.000113386	0.0415896	-0.0127813	-0.00363749	0.0472547	0.0202063	0.0139919	-0.000755477	0.0254628	-0.0392765
M_24pcw_S1C	-0.00930825	-0.0146059	-0.000714199	-0.0149419	0.000222854	-0.0345028	0.04303	-0.0155563	-0.0314082	-0.0183613	-0.0378777	-0.0369254	-0.0115987	-0.0130764	-0.0169049	-0.0118846	-0.0296163	-0.0127943	0.00419094	-0.0122581	-0.0254761	-0.0142592	-0.00815348	-0.0124543	-0.0133876	-0.000686921	0.000464647	0.0118666	-0.0199478	0.0114834	0.125207	0.0518386	0.0667563	-0.0201583	-0.0136254	0.0186924	0.00941405	0.0170374	0.00920853	0.0237126	-0.0366438
M_24pcw_MD	0.00365447	-0.00240618	-0.00363416	0.0818509	0.0142311	-0.00269965	0.0544075	-0.0168969	-0.0350924	-0.0181008	-0.00826937	-0.0310372	-0.0124464	-0.00466568	-0.016706	-0.0424077	-0.0376712	-0.0122529	0.0502304	0.0373569	0.0419631	0.000341584	0.0263735	0.0311928	0.0863531	0.158735	0.40144	0.023882	-0.000413788	-0.0256475	0.0913626	0.00477896	0.0255736	-0.0187709	-0.00816139	0.0331387	0.000920678	-0.0210979	-0.045203	-0.0195874	-0.043627
M_24pcw_STR	-0.00375166	0.0135408	-0.0147006	-0.0105142	0.00453502	0.0319283	0.0512814	-0.0137004	-0.0327362	-0.0136727	-0.0204598	-0.0273781	-0.0082336	-0.00543433	-0.0115331	-0.0056518	-0.023918	-0.00908693	0.012524	-0.0178438	-0.0120431	0.0489987	0.212525	0.00450505	-0.00534958	0.00991991	0.016372	0.0228374	-0.0209958	0.0015412	0.0275741	0.0174	0.0332911	-0.0132872	0.0457768	0.0296428	0.0281361	-0.0119524	0.0300635	0.0440238	-0.0319538
M_24pcw_A1C	-0.0123604	-0.0179884	-0.00193581	-0.0281158	-0.00679784	-0.0384371	0.0357796	-0.0167986	-0.0320044	-0.0224228	-0.0430088	-0.0396231	-0.0168681	-0.0177433	-0.0181489	-0.0386545	-0.0413619	-0.0122453	0.00600663	-0.0193626	-0.0166043	-0.017886	-0.0108403	-0.0132653	-0.0168142	-0.00407281	-0.00364444	0.0252126	-0.0252349	0.000364224	0.12961	0.0140704	0.0487134	-0.0149847	-0.0100424	0.035346	0.0228113	0.0141781	-0.0164162	0.0172539	-0.0440602
M_24pcw_IPC	-0.0144463	-0.0179889	-0.0173496	-0.0428526	-0.0172263	-0.0418679	0.0146893	-0.013981	-0.0323892	-0.0206975	-0.0455216	-0.0403028	-0.0140145	-0.0199507	-0.0197838	-0.0381194	-0.0390453	-0.0154726	0.0102897	-0.0178916	-0.00638885	-0.0176967	-0.0131119	-0.0166198	-0.019033	-0.00824165	-0.00566765	0.0365947	-0.0249292	0.00126413	0.122447	0.00668737	0.0448483	-0.0067916	-0.00772611	0.0461033	0.0246305	0.0159757	-0.0146401	0.0152579	-0.0435118
M_24pcw_OFC	-0.0108392	-0.0169598	-0.00747067	-0.035318	-0.0115752	-0.0318896	0.0132554	-0.0168421	-0.0315153	-0.0181403	-0.0400715	-0.0378543	-0.0113543	-0.0189292	-0.0160844	-0.0342464	-0.0377897	-0.0120781	0.0153991	-0.0255114	0.0137161	-0.0180002	-0.0125458	-0.0146677	-0.0189383	-0.00945172	-0.00368819	0.0253403	-0.0312192	-0.024958	0.122152	-0.0215632	0.0361728	0.00177844	-0.00116746	0.0610581	0.0446072	0.00560807	-0.00601087	0.0100194	-0.0418252
M_24pcw_STC	-0.00974934	-0.0135448	0.00902284	-0.0199782	0.00723963	-0.0352146	0.0374905	-0.0151958	-0.0283009	-0.0176452	-0.032463	-0.0385259	-0.00577858	-0.0137642	-0.0106274	-0.00369218	-0.0336567	-0.0115075	0.0589768	0.0157325	0.00676611	-0.0153085	-0.0108112	-0.0139835	-0.0161692	-0.00474777	0.00217173	-0.0177449	-0.0273642	-0.0393616	0.102166	0.0468532	0.0875137	-0.00573798	-0.0118064	0.0262609	0.0521123	0.000776843	-0.00259801	0.00244007	-0.0360395
M_24pcw_ITC	-0.0114743	-0.0138256	-0.0142324	-0.0346469	-0.0106687	-0.0350925	0.0305605	-0.0153421	-0.0298719	-0.019521	-0.0439432	-0.037549	-0.0131031	-0.0161081	-0.0159001	-0.0189146	-0.0316334	-0.0153291	-0.00999328	-0.0294732	-0.0232599	-0.0154998	-0.00736748	-0.0103167	-0.0171931	-0.00462577	-0.00403143	0.0235836	-0.0257466	0.00738326	0.119105	0.0151369	0.049329	-0.0141147	-0.00790995	0.0331013	0.015973	0.0128414	0.0120807	0.0252294	-0.0358148
M_24pcw_VFC	-0.00449079	-0.0160216	0.0224179	-0.00893079	0.00468706	-0.0298973	0.0327722	-0.016497	-0.03207	-0.0205173	-0.0364996	-0.0373786	-0.0134942	-0.0162932	-0.0194403	-0.0282407	-0.0379782	-0.0142353	0.0188128	-0.0124562	-0.00540993	-0.0167107	-0.0128523	-0.0138702	-0.0149181	-0.002129	-0.00154004	0.0160296	-0.0249975	-0.0133752	0.128967	0.0214462	0.0587636	-0.0159902	-0.00700027	0.0391821	0.0233296	0.00665379	-0.00716201	0.0151752	-0.0400553
M_24pcw_M1C	-0.00514664	-0.0163273	0.00102076	0.017521	0.0125043	-0.0214681	0.0493925	-0.0161548	-0.0298158	-0.0178531	-0.0262629	-0.036329	-0.0170371	-0.0155597	-0.0181589	-0.0397357	-0.0427234	-0.0127028	0.0311938	-0.00155195	0.00129547	-0.0140328	-0.0108868	-0.00826127	-0.0137204	-0.00224554	0.00718963	0.0171431	-0.023272	-0.0124273	0.09481	0.0180221	0.0493608	-0.00286117	-0.0044149	0.0351045	0.0470172	0.0145878	-0.026298	0.0071723	-0.0446664
M_24pcw_MFC	-0.0081775	-0.0124873	-0.0036393	-0.0277392	-0.00691683	-0.0202527	0.0297845	-0.0140192	-0.029646	-0.0189186	-0.0368773	-0.0336895	-0.00983351	-0.013	-0.0149655	-0.0143418	-0.0248479	-0.0102185	-0.0107568	-0.0320343	-0.017074	-0.0150709	-0.00672853	-0.00684428	-0.0143887	-0.00595761	-0.00272151	0.0297312	-0.0260649	0.00826465	0.106142	0.00557473	0.0407995	-0.0184587	-0.00180404	0.0384442	0.0113667	0.0144657	0.0215847	0.0292135	-0.0260035
M_24pcw_CBC	0.0036806	-0.00404723	-0.00473979	0.0355307	0.012723	0.0534941	0.0605445	-0.012941	-0.0320994	-0.0178199	-0.00941691	-0.0238833	0.00253766	0.0237374	-0.0106227	-0.0288759	-0.032963	-0.0112579	0.0269244	-0.00617556	0.00816121	-0.00491625	0.0188034	0.28273	0.00896902	0.0417115	0.0451544	0.0266349	-0.0197322	-0.0163835	0.0405926	-0.0100875	0.0176155	-0.0121401	0.0337167	0.0337309	0.0300526	-0.010347	-0.0127477	0.0239641	-0.0266464
M_24pcw_V1C	-0.0116561	-0.0177442	-0.00110926	-0.00381428	0.00396957	-0.0116748	0.0340767	-0.0094106	-0.0318876	-0.0163175	-0.0340897	-0.0341908	-0.00908457	-0.0111507	-0.010697	0.00893209	-0.0262445	-0.0123891	0.0276209	-0.0104979	-0.0187889	-0.0167132	-0.0139735	-0.0106475	-0.0171055	-0.0102996	-0.0133233	0.00130399	-0.030149	-0.0162467	0.0386781	0.0476342	0.0661399	-0.00913648	0.0054446	0.0235815	0.0377825	0.0133036	0.034339	0.040268	-0.0325897
F_25pcw_A1C	0.00247872	-0.00596698	0.00713935	0.0197782	0.00202533	0.0785914	0.129277	0.0130611	0.0510459	0.0396008	0.0981784	0.0217573	0.00671512	0.00330733	0.0175773	0.0312377	0.0338278	0.00405844	-0.0387237	-0.0193911	-0.0242831	-0.00830506	-0.0162672	-0.000694571	-0.00939931	-0.00929952	-0.0118945	-0.0562167	-0.029575	-0.0473347	-0.0475296	-0.0439957	-0.0333554	-0.00763476	-0.0146712	-0.0479534	-0.0411523	-0.0305747	-0.00485992	-0.0306539	0.0683044
F_26pcw_STC	-0.00888403	-0.00574598	-0.0165934	-0.0100351	-0.0129886	0.0305795	-0.0256261	-0.0105671	-0.019174	-0.0232348	-0.0359281	-0.0336193	-0.0159863	-0.0177103	-0.018121	-0.0236003	-0.0349597	-0.0142354	0.0121728	-0.040676	0.0105774	-0.0203698	-0.00989789	-0.00479086	-0.0251798	-0.0138251	-0.0146539	0.041445	-0.0444379	-0.0198444	-0.0240449	-0.0284255	0.0130167	0.00302492	0.070957	0.0794121	0.0537336	0.0339799	0.0309822	0.0547202	-0.0336502
F_26pcw_V1C	0.00257094	-0.00928304	0.00968816	-0.0105578	0.00216207	0.0527196	0.0485532	0.0599137	0.136199	0.0784867	0.087736	0.0431739	0.0173197	-0.00829824	0.0309037	0.0327934	0.0407038	0.0136455	-0.0548339	-0.0390336	-0.0400882	-0.0141158	-0.0199158	-0.00950525	-0.0119569	-0.0126473	-0.0178826	-0.0734253	-0.0408257	-0.0553881	-0.0632622	-0.0642501	-0.0448604	-0.0208424	-0.0241762	-0.0592405	-0.0486229	-0.0365119	-0.0117557	-0.0402932	0.0999068
F_26pcw_DFC	0.000231302	0.00295896	0.000723454	0.0121323	-0.000532391	0.0475666	0.0831611	0.0596977	0.119779	0.0330237	0.0709971	0.0640434	-0.00163331	-0.0144741	0.0034556	-0.00457378	0.0061174	0.000511138	-0.0401794	-0.0272845	-0.0340597	-0.0134278	-0.0196229	-0.00704375	-0.0144335	-0.0131036	-0.0154612	-0.0723853	-0.0399547	-0.058325	-0.0570964	-0.0535906	-0.0368505	-0.00759292	-0.0233349	-0.0545067	-0.0334874	-0.0360555	-0.0336598	-0.0409533	0.0628461
F_35pcw_CBC	0.00666175	0.021629	-0.00320877	-0.0387726	0.0125228	0.0378299	-0.00867112	0.00581206	0.00265497	0.0333738	0.0147423	-0.0171499	0.95057	0.0515031	0.0643781	0.218771	0.0571506	0.0188268	-0.0168378	-0.0248537	-0.0193901	-0.00488597	-0.00377845	0.124328	-0.0130673	-0.00731372	0.020807	-0.0722765	-0.0414155	-0.0641957	-0.0494586	-0.0105339	0.0146667	0.0335465	0.00749864	-0.0287692	0.0524526	-0.0273888	0.109528	0.00390501	0.129554
F_35pcw_VFC	0.00369279	0.00838641	-0.00588015	-0.0526921	0.0416365	0.0353264	0.0869349	-0.0128721	-0.00476493	0.00585375	0.0485853	-0.0221209	0.0202872	0.00623447	0.0220955	0.164782	0.0389879	0.00703965	0.0388604	0.049774	-0.0147381	-0.00220172	-0.00542045	-0.00268905	0.000453279	-0.00876491	0.0364923	-0.0918902	-0.0255985	-0.0622807	0.0389123	0.0639767	0.078751	0.00481681	-0.0191492	-0.0499589	0.0894062	-0.026164	0.0350445	-0.029265	0.0419338
M_37pcw_A1C	0.00494349	-0.00394785	0.0203779	0.0647631	0.155806	0.0400208	0.0844122	-0.0139934	-0.0201338	-0.00954579	0.0396133	-0.0228092	-0.000221739	-0.0018223	-0.0106978	-0.00752502	-0.0185487	-0.0100517	0.0153893	0.0145308	-0.00652441	-0.00720349	-0.00322625	-0.00115695	0.000321388	0.00137168	0.011417	-0.0282203	-0.00851979	-0.023712	0.0762162	0.0297086	0.0328612	-0.0153579	-0.0141679	-0.0161356	0.0251638	-0.0112298	-0.0249065	-0.0164511	-0.0156956
M_37pcw_OFC	0.00753866	0.00243008	0.0185111	0.0490722	0.142318	0.0419115	0.0897278	-0.0137932	-0.0195181	-0.00743075	0.0371571	-0.0214855	0.00859873	0.00296919	-0.00773342	0.0267768	-0.000896428	-0.00791043	0.0409208	0.0312767	-0.00647649	-0.00426019	-0.000392267	0.000178348	-0.0010725	0.00510612	0.0282791	-0.0412107	-0.0105733	-0.0315644	0.0677686	0.0477151	0.0520167	-0.0104156	-0.0127841	-0.0211371	0.0360242	-0.0126399	-0.00636865	-0.012981	0.0123375
M_37pcw_AMY	0.0293935	0.130928	0.0313337	0.144787	0.256685	0.121633	0.0960048	-0.00971087	-0.00890866	0.0152539	0.112253	-0.00377662	0.0351472	0.00854101	0.00396409	0.0586045	0.0259462	0.00474853	0.0376294	0.0229107	-0.00171319	-0.0025919	0.00136289	0.00679051	-0.00281286	0.000657323	0.0176468	-0.0586851	-0.0267651	-0.0575504	-0.0277913	-0.00234041	0.0112414	-0.00149615	0.000258174	-0.0342583	0.0560402	-0.0246127	0.00432042	-0.0158199	0.0521583
M_37pcw_V1C	0.0119255	0.00339867	0.058219	0.0796461	0.208137	0.0354873	0.0628527	-0.0139865	-0.0157722	-0.00843798	0.0498573	-0.0227315	0.0102102	0.00992906	-5.00612e-05	0.0498616	0.0131935	0.00224359	0.0625248	0.0486272	0.00986606	-0.00256517	0.000705913	-0.00190734	0.00629415	0.00114288	0.0224532	-0.0507074	-0.0117304	-0.0370968	0.0602383	0.0443323	0.0515073	-0.00831415	-0.0140519	-0.0208371	0.043993	-0.014038	0.000672342	-0.0178799	0.00858897
M_37pcw_MFC	0.010245	0.00666752	0.0121647	0.0547525	0.161145	0.0574224	0.0986492	-0.0113943	-0.0198721	-0.0116354	0.0498485	-0.017972	0.00689183	0.0037701	-0.00192985	0.0306633	0.00213945	-0.00442049	0.0377359	0.0324797	-0.0125724	-0.00420175	-0.00385085	0.00632699	-0.00353189	0.00777537	0.026939	-0.0456444	-0.0127271	-0.0348259	0.0534551	0.0508032	0.0531695	-0.0107377	-0.0125701	-0.0275288	0.0287189	-0.0123485	-0.00605994	-0.0133914	0.00065018
M_37pcw_MD	0.0487807	0.020215	0.162184	0.236878	0.427887	0.142937	0.101026	-0.0100118	-0.00401521	0.0094675	0.16256	0.00646975	0.00957267	0.0146988	-0.000830306	0.0256761	0.00213957	0.0261987	0.0494354	0.0202587	0.0179698	-0.00665995	-0.00773729	0.0284133	0.0118983	0.0215012	0.0369512	-0.0626024	-0.036785	-0.0718243	-0.0464879	-0.0441789	-0.01324	-0.00153008	0.00515323	-0.0290934	0.0604477	-0.029738	-0.0226484	-0.0264937	0.0149322
M_37pcw_CBC	0.0259789	0.0130941	0.08185	0.104426	0.213751	0.101616	0.0568823	-0.00914381	-0.01881	0.00422916	0.0562276	-0.00964642	0.0862407	0.0677459	0.00979668	0.115033	0.034021	-0.00022333	0.00500048	-0.00485749	-0.0201661	-0.00919712	0.00217932	0.176749	0.00297457	0.0144578	0.0181963	-0.0347	-0.0248668	-0.0435001	-0.0194777	0.0097995	0.018764	-0.0101813	0.0228526	-0.0168728	0.03102	-0.0151532	0.0545337	0.020812	0.0509722
M_37pcw_STR	0.0244903	0.0232875	0.0332659	0.130873	0.274842	0.132864	0.109504	-0.0123077	-0.00776605	0.0184115	0.114364	0.000643373	0.0330033	0.0121223	0.0143934	0.0867087	0.0430791	0.0123086	0.00997265	0.00584679	-0.0240356	0.0179834	0.0155582	0.0112259	-0.0044443	0.000230123	0.00800478	-0.0593598	-0.0291702	-0.0540481	-0.0405867	0.000694017	0.00855867	-0.00653575	0.000804824	-0.0435766	0.0354129	-0.0273974	0.0149704	-0.00860094	0.0684853
M_37pcw_IPC	0.00568887	-0.00484952	0.00975491	0.0320251	0.128009	0.0277845	0.0885965	-0.0138238	-0.021028	-0.00444777	0.0261492	-0.0265777	-0.0090001	-0.00232236	-0.00857073	-0.0100343	-0.0223357	-0.00843096	0.0192551	0.0170288	-0.0133281	-0.00648	-0.00205934	-0.00177975	-0.00498163	0.00418239	0.0143212	-0.0325244	-0.0119456	-0.0240582	0.080607	0.0460779	0.0495072	0.0237272	-0.0160149	-0.0170285	0.0277154	-0.00896598	-0.0250483	-0.0155814	-0.0114364
M_37pcw_ITC	0.00671321	-0.00330343	0.0377745	0.0179988	0.142479	0.0127719	0.0895778	-0.0164445	-0.021708	-0.0116765	0.0161354	-0.0277736	0.00168073	0.00244476	-0.00851031	0.0134262	-0.0129866	-0.0102275	0.0345823	0.0380656	-0.0285909	-0.00173793	0.00447683	0.000590601	0.00051663	0.0110799	0.0301787	-0.049241	-0.0062374	-0.0221756	0.0853237	0.0961436	0.082361	-0.0205044	-0.023495	-0.0320823	0.0146248	-0.00792302	-0.015199	-0.0126849	-0.00761043
M_37pcw_S1C	0.0105622	0.00217722	0.0475201	0.128138	0.228516	0.0675296	0.0774621	-0.012849	-0.0133043	-0.000601251	0.0728495	-0.0154725	0.00735466	0.00440864	-0.00147156	0.0284175	0.00262128	0.00447781	0.0314973	0.0252483	0.00874046	-0.00563513	-0.00652448	-0.00198457	-0.000309995	0.00013611	0.0172497	-0.0391674	-0.0153106	-0.041633	0.0401237	0.0134927	0.0255172	-0.013537	-0.00689361	-0.0169486	0.0341099	-0.0161724	-0.010385	-0.0201853	0.013676
M_37pcw_DFC	0.00611961	0.00103067	0.00964169	0.0398152	0.140151	0.0268899	0.079698	-0.0140398	-0.0244971	-0.0160323	0.0294608	-0.0245641	0.000289483	0.000815084	-0.0148113	0.0122273	-0.0136728	-0.0056603	0.0521201	0.0423844	-0.000528917	-0.00332743	-0.00190322	-0.00119318	-0.00374363	0.00700595	0.0268473	-0.0415795	-0.00644383	-0.0304476	0.0830708	0.0601125	0.0630742	-0.0101974	-0.0163193	-0.0176261	0.0332114	-0.00845248	-0.0164887	-0.0160625	-0.0215454
M_37pcw_STC	0.00462718	-0.00306152	0.0142773	0.0430174	0.145161	0.0207803	0.0766201	-0.0144271	-0.0220968	-0.0134538	0.0311249	-0.0270939	-0.00241791	0.000857088	-0.00966365	0.00863716	-0.0186093	-0.00507684	0.053643	0.0510226	-0.00442793	-0.0035193	0.00184911	-0.00243836	-0.00207196	0.00295909	0.0219774	-0.0456256	-0.00731767	-0.0334318	0.0790034	0.07439	0.0684175	-0.0158877	-0.0195102	-0.0216479	0.0343681	-0.0105676	-0.0233968	-0.0201433	-0.0193353
M_37pcw_M1C	0.0236177	0.00182927	0.0970115	0.0969179	0.306403	0.0891219	0.115034	-0.014914	-0.0128971	0.00143449	0.0918283	-0.0109062	0.0109941	0.0109731	0.000885784	0.039097	0.00130422	0.00206934	0.0328296	0.0327143	-0.0181229	-0.00496028	-0.00624457	0.0068134	0.00515202	0.00619196	0.0196055	-0.0590725	-0.0181823	-0.048082	0.0153639	0.0405643	0.040318	0.0266439	-0.00904466	-0.0385497	0.0267245	-0.0186634	-0.0123839	-0.0171264	-0.00112186
M_37pcw_VFC	0.0195522	0.00218446	0.0699301	0.0567348	0.215702	0.0524222	0.0878962	-0.0129608	-0.022631	-0.0118474	0.0540821	-0.0182858	-7.98532e-05	0.00665551	-0.00442757	0.0246486	-0.0025541	0.00410459	0.0385843	0.0314041	-0.00589943	-0.00430787	-0.00292377	0.00379112	0.00241061	0.00703728	0.0208652	-0.0466691	-0.0112349	-0.036654	0.0594466	0.0440833	0.0516587	-0.013355	-0.0115214	-0.0243774	0.0267222	-0.0131488	-0.012068	-0.0157823	0.000817976
M_37pcw_HIP	0.0849372	0.700545	0.0394004	0.168227	0.28894	0.161372	0.122354	-0.010507	-0.00657302	0.0112566	0.129165	0.00867162	0.0285363	0.0172196	0.0190524	0.103458	0.0468362	0.000681737	0.02387	0.0194436	-0.0285474	-0.000114986	-0.00205968	0.0151193	0.00331643	-0.000771509	0.0151867	-0.0763865	-0.026532	-0.0596473	-0.0356671	0.0340786	0.0292909	-0.0139024	0.00609536	-0.0520513	0.0155086	-0.0257631	0.0204134	-0.00358607	0.0588301
M_4mos_STC	-0.00319662	0.0120556	8.18292e-05	0.0103576	-0.0135126	-0.0273773	-0.0197091	0.0253966	0.0145801	0.00445158	-0.00875488	-0.0236695	0.0115972	-0.0103327	-0.00386343	-0.0238792	0.00357885	0.00757281	-0.0365458	-0.0218598	0.0391167	0.00483941	-0.000796697	-0.00571042	0.00516232	-0.00463099	0.00155484	0.0451705	0.0303628	0.0482216	0.066815	-0.0529965	-0.0398915	0.116187	-0.011893	0.0166507	-0.0308471	-0.00939604	-0.00446822	-0.0254052	0.032101
M_4mos_STR	-0.00266755	0.0113656	0.00815934	0.0198624	0.00444551	-0.0201122	-0.00125431	0.02123	0.0429697	0.00374076	0.0134681	0.00360653	-0.000613403	-0.000211838	-0.000395662	-0.00546089	0.00330667	-0.00251741	0.0463368	0.0631487	0.0276225	0.373322	0.0875992	-0.00168971	0.0257449	-0.00480509	0.00817294	-0.0414916	0.019269	-0.0104979	-0.0161857	0.0315757	0.000897166	0.00419934	-0.0245077	-0.0326158	-0.0183278	-0.0248399	-0.0294847	-0.0393311	0.00800376
M_4mos_V1C	-0.00566258	-0.00516737	-0.00471173	0.0056037	-0.0105394	-0.032788	0.0159652	0.00137241	0.000570677	-0.0120873	-0.0148878	-0.0229235	-0.00458671	-0.00693935	-0.00839193	-0.016096	-0.00912651	-0.00754976	-0.0249706	0.0129646	-0.0220538	0.00639514	-0.000200641	-0.00824374	0.0100902	-0.000201837	-0.00367081	0.00593074	0.043288	0.0786425	0.0856793	0.0507805	0.00175907	-0.000178915	-0.0267505	-0.0280243	-0.0458652	-0.00782236	-0.0164139	-0.0221264	-0.00300405
M_4mos_CBC	0.0143284	-0.00309887	0.0515428	0.138642	0.0406672	0.0396767	-0.00896036	-0.00176962	0.00703421	-0.00603656	0.0297533	-0.0116071	0.00751251	0.167966	0.0142168	0.0256917	-0.00728178	0.013544	0.0476243	0.0294257	0.054952	-0.0023286	-0.00850785	0.0843304	0.0167264	-0.000458291	0.0115226	0.0129178	0.00372357	-0.0233324	-0.0100334	-0.0282508	-0.0123735	-0.00961097	0.0217488	0.0195908	0.00365915	-0.0175898	0.0106138	-0.00225319	-0.00535981
M_4mos_HIP	0.0199357	0.0463113	0.00585128	-0.000742385	-0.00199336	-0.00506157	0.0284792	0.000213223	0.0145188	0.00200056	0.00946635	-0.017268	-1.5349e-05	-0.00622539	0.00130387	-0.0160071	0.000776786	0.000232905	-0.00831417	0.0137748	0.00870662	0.0147574	0.00526092	0.00272428	0.0163149	-0.00441878	0.00481324	-0.00966388	0.0221863	0.0136309	0.0173742	0.0110711	-0.0157022	-0.0135353	-0.0222921	-0.0244861	-0.0358668	-0.0187043	-0.02541	-0.0322144	0.024307
M_4mos_MD	-0.00174591	0.00601193	0.000428416	-0.0319442	-0.0130427	-0.0221345	-0.0233225	-0.00315508	-0.00101747	-0.00977279	-0.00182264	-0.0119657	-0.0081681	0.00246771	-0.00472725	-0.0237404	-0.00697734	-0.00282739	0.00177207	0.0265235	0.0303116	0.00183345	0.00760804	0.00343701	0.284184	0.0805331	0.104687	0.0302748	0.0375998	0.0334535	0.0318322	0.00670252	-0.0214551	-0.0117959	-0.0188485	-0.00435597	-0.0404279	-0.0224548	-0.0276944	-0.0311433	-0.00917708
M_4mos_ITC	-0.00334177	0.020102	-0.00705504	0.000290623	-0.0183269	-0.0238112	-0.0236087	0.0147362	0.0132284	0.00014088	-0.00944785	-0.0255215	-0.00344747	-0.0130199	-9.92375e-05	-0.0309755	0.000393827	0.00933601	-0.0454781	-0.0331026	0.0607377	0.00369519	0.00751285	-0.00387106	0.00378863	-0.00460959	0.0031603	0.0556358	0.0257867	0.0397149	0.0665844	-0.0717378	-0.0459491	0.0522431	-0.00784037	0.0302052	-0.0283282	-0.00839043	-0.00318831	-0.0261108	0.026177
M_4mos_AMY	0.0192435	0.105117	0.00561301	0.0300947	0.0055874	0.00654131	0.0408927	-0.00553107	0.0167815	0.00908567	0.0225627	0.00193695	0.00184227	0.00313063	0.00800714	0.0166425	0.0167399	0.000625131	0.0127041	0.0400197	-0.00483036	0.033723	0.019621	0.00261815	0.056973	0.00929121	0.0137192	-0.0403385	0.0215394	-0.00111342	0.00701241	0.0493153	0.00770247	-0.0180003	-0.0220441	-0.0406116	-0.0317057	-0.0248688	-0.015275	-0.0298949	0.0136602
M_4mos_MFC	-0.00788306	-0.00113718	-0.00412207	0.0118832	-0.0122588	-0.0324947	-0.00731812	0.0515697	0.0256866	0.00420383	-0.00943938	-0.0294183	-0.00276302	-0.0120126	-0.00403772	-0.0254512	-0.0056047	-0.000356079	-0.0184143	-0.00327477	0.0387299	0.00523633	-0.00580295	-0.00690714	0.00623632	-0.00608417	0.00323311	0.0105637	0.0291851	0.0238813	0.0765705	-0.0281163	-0.0249809	0.14775	-0.0193332	0.00250584	-0.0245105	-0.014308	-0.0124689	-0.0307207	0.018693
M_4mos_M1C	0.00426863	-0.00364535	0.0154604	0.0294819	0.0222628	0.102509	0.17469	-0.00407004	0.0025178	0.0138544	0.10266	0.0194798	0.0134326	-0.00137193	0.0147975	0.0439948	0.0423987	0.00328833	-0.0342242	-0.0142603	-0.027514	-0.00999106	-0.0122546	-0.00318972	-0.00175092	-0.00642422	-0.00819677	-0.0434582	-0.0219916	-0.0332059	-0.0330459	-0.0298119	-0.028009	-0.0251263	-0.0113408	-0.0460329	-0.0384287	-0.0257779	0.00829463	-0.0171642	0.0434893
M_4mos_DFC	0.00413301	0.00205543	0.0313021	0.0500622	0.0343546	0.0894844	0.106384	-0.00116901	0.00830988	0.0129132	0.109824	-0.000216258	0.0178494	0.00013953	0.0128828	0.0488352	0.0369704	0.0292506	0.0486856	0.0324945	0.05695	-0.00457392	-0.00891973	-7.27464e-05	-0.00184232	-0.00330351	0.00492193	-0.0494802	-0.0249923	-0.0507488	-0.020533	-0.0471754	-0.0233965	-0.00162392	-0.0047853	-0.0210964	0.0327339	-0.0267686	0.0108108	-0.0274778	0.0614468
M_4mos_OFC	0.00051395	0.000799935	0.0106174	0.0359287	0.0263258	0.10308	0.207557	-0.00829156	0.010274	0.0188483	0.0989823	0.000650009	0.0111155	0.000508266	0.0152858	0.06265	0.0434351	0.00387305	-0.0136035	0.00390464	-0.0266758	-0.00914422	-0.0129656	0.000244419	-0.00462153	-0.00933643	-0.000804305	-0.0571285	-0.0238211	-0.0391675	-0.0261864	-0.00602963	-0.0106213	-0.0129034	-0.0122015	-0.049257	-0.0258632	-0.0265217	0.0153076	-0.0167201	0.0554625
M_4mos_A1C	0.00416377	0.00240174	0.0279641	0.0253645	0.0401016	0.107638	0.120693	-0.00895757	0.00470267	0.0216974	0.122733	0.00333305	0.0191126	0.0017947	0.0125743	0.0560816	0.0464895	0.0137645	0.0172117	0.0114584	0.0352416	-0.00761033	-0.0118355	-0.000324254	-0.00387775	-0.00723624	-0.0016811	-0.0418039	-0.0266704	-0.0488111	-0.0316188	-0.0540785	-0.0312047	-0.0182638	-0.00332683	-0.0242657	0.0028042	-0.0265558	0.0160046	-0.0231807	0.056253
M_4mos_STC.1	0.00155086	0.00228201	0.0126415	0.0365998	0.0182102	0.0663169	0.0723883	-0.00282389	0.010567	0.0161546	0.0884373	0.00756518	0.0221813	-0.000388964	0.0172769	0.0673374	0.0551175	0.0179439	0.0297483	0.0233088	0.0465107	-0.00647061	-0.00936888	-0.00445464	-0.00575927	-0.00950174	0.00342336	-0.0494106	-0.0242043	-0.0482401	-0.0215668	-0.0470625	-0.0264058	-0.0166472	-0.00998086	-0.0260501	0.0186859	-0.026266	0.0179272	-0.0296876	0.0839685
M_4mos_VFC	0.00590236	0.00234505	0.0287441	0.0639035	0.0384922	0.0880953	0.147745	-0.00450869	0.00389781	0.0103396	0.0955444	0.0067623	0.023064	0.00220177	0.011966	0.0563828	0.0443639	0.0101986	0.0142904	0.0217669	0.00306744	-0.00427217	-0.0113399	0.00136025	0.000808425	-0.00697033	-0.00067314	-0.0511816	-0.0172838	-0.0387049	-0.0191684	-0.0147836	-0.0142755	-0.00805495	-0.00945507	-0.038037	-0.00921026	-0.024909	0.0118239	-0.0205374	0.0392187
M_4mos_ITC.1	0.0032976	0.00429342	0.0161472	0.0456261	0.0204139	0.0626541	0.0771136	-0.00922649	0.00264775	0.00635212	0.0797157	-0.00737573	0.0240237	0.00262169	0.0150445	0.0645068	0.0520247	0.018267	0.0432043	0.0342047	0.0606892	-0.00158784	-0.00563474	0.000999831	-0.000966607	-0.00666776	0.0084109	-0.0398672	-0.0152458	-0.0410644	-0.00177903	-0.0384918	-0.0206842	-0.00665806	-0.00828173	-0.0175695	0.03315	-0.0224418	0.0274141	-0.0265188	0.0648497
M_4mos_AMY.1	0.0233075	0.235395	0.0371443	0.036206	0.0556031	0.102035	0.179779	-0.00344591	0.0191383	0.02195	0.102029	0.0135841	0.0209204	0.00310125	0.018145	0.0481815	0.0425374	0.00235906	-0.028376	-0.0159273	-0.0364886	-0.00689792	-0.00851528	0.00303892	1.78856e-05	-0.00418416	0.00118227	-0.0582802	-0.0299171	-0.0466065	-0.0389837	-0.0213017	-0.0172692	-0.0194139	-0.00772484	-0.0516047	-0.0261832	-0.0270805	0.0096155	-0.0157457	0.067281
M_4mos_M1C.1	-0.00737149	-0.0102485	-0.00281411	0.0619433	0.000781123	-0.00908808	0.0473407	-0.0168234	-0.0126301	-0.0167321	0.0127696	-0.00154563	-0.0112897	-0.0105744	-0.0124396	-0.0326611	-0.0323183	-0.0102504	0.0322774	0.0668219	0.0112114	0.000476584	-0.00863306	-0.0106655	0.00371671	-0.0090827	0.00267753	-0.0188536	0.0243511	-0.00412458	0.0490486	0.0499687	0.00690003	-0.0252188	-0.0251818	-0.0252447	-0.0224577	-0.0195175	-0.050776	-0.0402124	-0.0331126
M_4mos_MD.1	-0.00292048	-0.0103646	-0.00656257	-0.028455	-0.0123385	-0.0240963	0.00556885	-0.0122092	-0.0146263	-0.0201476	-0.00128786	-0.020417	-0.0135114	-0.00198545	-0.0155216	-0.0411838	-0.0305592	-0.0170849	0.0294435	0.064008	0.0218388	-0.00108712	0.00212547	0.00122601	0.272395	0.0841838	0.128602	0.0109881	0.0346208	0.0135494	0.0462637	0.0468404	-0.00274024	-0.0276173	-0.0270886	-0.0161817	-0.031927	-0.0258619	-0.0525926	-0.0385782	-0.0418465
M_4mos_OFC.1	-0.00723014	-0.00663948	0.00693648	-0.0201644	-0.00255879	-0.0187411	0.0234118	-0.0178504	-0.0159344	-0.0184783	0.00247609	-0.0358251	-0.0120589	-0.0110408	-0.00964884	-0.0416733	-0.040076	-0.00489938	0.0947965	0.114024	0.0568037	-0.000218119	-0.00646982	-0.0103291	0.00384363	-0.00537344	0.00920819	0.00803772	0.0195186	-0.0207913	0.0838151	0.0322142	0.015588	-6.35111e-06	-0.0203408	0.00819767	0.00317109	-0.0168942	-0.0594211	-0.044681	-0.044147
M_4mos_STR.1	0.00808804	0.0890856	0.0209266	0.0550261	0.0268284	0.0614178	0.139348	-0.0102173	-0.00393117	-0.00508785	0.056953	0.00707616	-0.00332165	-0.000377311	-0.00119649	-0.00466063	0.00741185	0.00360968	0.00747032	0.0158078	0.00907589	0.158378	0.0551401	0.00648195	0.0069582	0.00361602	0.00474359	-0.0148738	-0.00469267	-0.0213133	-0.0117937	-0.0095545	-0.0156021	-0.0156295	-0.00714844	-0.0222161	-0.00661377	-0.0224441	-0.0216275	-0.023032	-0.00482602
M_4mos_STC.2	-0.00577631	-0.00953618	0.00333699	-0.0120951	-0.00140336	-0.00754203	0.0441304	-0.0170265	-0.0109896	-0.0171013	0.0121589	-0.0312491	-0.0134693	-0.009375	-0.0109343	-0.0353056	-0.0312022	-0.00841471	0.0527327	0.0737668	0.0369623	0.00113768	-0.00546992	-0.0090504	0.00373482	-0.00661178	-0.00150046	-0.00581013	0.0172857	-0.0106532	0.065209	0.0258772	0.00550487	-0.023634	-0.0222616	-0.00848308	-0.00663083	-0.0184371	-0.0502221	-0.0406421	-0.0322897
M_4mos_A1C.1	-0.00777916	-0.00953454	-0.00653811	-0.00779441	-0.00525736	-0.00723728	0.0430839	-0.0116382	-0.00550983	-0.00790167	0.0126356	-0.0252956	-0.00537982	-0.00984485	-0.00681164	-0.0223667	-0.0194292	0.000384706	0.0160251	0.0387719	0.0263	0.000110838	-0.00971346	-0.0100938	0.00343644	-0.00868378	-0.00348802	-0.00962472	0.0135605	-0.0112672	0.0557701	0.00997246	-0.00631946	-0.0254852	-0.0225005	-0.0135444	-0.0193465	-0.0181291	-0.038848	-0.0387146	-0.0134506
M_4mos_HIP.1	0.0144338	0.132092	0.0142456	0.0675097	0.0165823	0.0810182	0.151937	-0.0147497	0.00479568	-0.00891688	0.0645262	0.0119493	-0.00545636	-0.00550575	-0.0065178	-0.0214984	-0.0180474	0.00188013	0.00823025	0.0146644	0.0122577	-0.0040407	-0.00225219	0.00303138	0.00255249	-0.0016201	0.00325663	-0.0245439	-0.0172682	-0.042211	-0.00930466	-0.0241607	-0.0173371	-0.0220113	-0.00506891	-0.0198197	-0.00865458	-0.0260057	-0.0376546	-0.0277015	-0.0187717
M_4mos_AMY.2	-0.00178141	0.00198982	0.00872388	0.0293667	0.00667787	0.0250274	0.105677	-0.0120601	-0.0115632	-0.0150987	0.0271403	-0.0195177	-0.00232029	-0.00325403	-0.0058039	0.0123749	0.0140233	-0.00933603	-0.00370211	0.0308886	-0.00439403	0.00999407	0.00185028	0.00062499	0.00723651	0.000459036	0.00683642	-0.0144092	0.0124575	-0.00169078	0.0279411	0.0309245	0.000499058	-0.0239932	-0.0203098	-0.0283241	-0.0258621	-0.0168973	-0.0100552	-0.0258558	-0.0100561
M_4mos_MFC.1	-0.00763249	-0.00619571	-0.00774121	0.00499895	-0.00547291	-0.0186315	0.0426386	-0.0122921	-0.018639	-0.019205	-0.00401353	-0.0302831	-0.0118388	-0.0088442	-0.0107115	-0.0280364	-0.0264139	-0.00890707	0.0244776	0.0537994	0.00788106	0.00305992	-0.00628607	-0.00944484	0.00859965	-0.00148757	0.00399226	0.000900093	0.0307611	0.0200871	0.0910212	0.0562496	0.0154381	-0.0240568	-0.0235654	-0.0134788	-0.0243947	-0.0133384	-0.0382072	-0.0308337	-0.0379087
M_4mos_V1C.1	-0.00824152	-0.0105362	-0.00634783	-0.0179757	-0.00567083	-0.0307949	0.0218554	-0.014811	-0.0160831	-0.0195141	-0.0103601	-0.0314718	-0.0119106	-0.00690326	-0.0133783	-0.0207876	-0.0187872	-0.00381453	0.0104728	0.0457589	0.00191414	0.00335386	-0.00391664	-0.0100119	0.0105256	-0.00615155	0.000100671	0.00219485	0.0386496	0.0361443	0.091212	0.0578303	0.00928792	-0.0294184	-0.0272199	-0.019421	-0.0327839	-0.0123079	-0.0327731	-0.0297718	-0.0327117
M_4mos_ITC.2	-0.00567345	-0.00650691	0.0031763	-0.00688964	-0.00638956	-0.0272657	0.030352	-0.0152141	-0.00384459	-0.0181076	-0.00747603	-0.0346229	-0.0137324	-0.0115017	-0.0111758	-0.0370673	-0.030763	-0.0148742	0.0268936	0.0503079	0.0156264	0.0003158	-0.00300508	-0.00695424	0.00283639	-0.00239786	0.00592416	-0.00296401	0.0157075	-0.00291798	0.0865038	0.0279475	0.00848597	-0.0210732	-0.0272307	-0.0111036	-0.0164631	-0.0154259	-0.0481105	-0.039004	-0.0345765
M_4mos_S1C	-0.0100351	-0.00786742	-0.00292268	0.0029235	-0.00570713	-0.0253078	0.0290479	-0.0151617	-0.0162023	-0.020608	-0.00357864	-0.0310293	-0.0112037	-0.0113761	-0.0127297	-0.0332995	-0.0325238	-0.00882423	0.0401546	0.071671	0.0233734	0.00101772	-0.0058907	-0.0112235	0.00516296	-0.00540843	0.00335804	0.00056336	0.0293964	0.0041693	0.0813369	0.0485427	0.01083	-0.0219527	-0.0251872	-0.010335	-0.0197598	-0.0162423	-0.0477074	-0.0380882	-0.0386207
M_4mos_IPC	-0.00632793	-0.00953669	-0.000998834	0.0148664	-0.0041868	-0.0227441	0.0328822	-0.0159609	-0.0168436	-0.0198844	-0.00400187	-0.032063	-0.0121009	-0.010291	-0.0142836	-0.0377079	-0.0354145	-0.00920002	0.0312756	0.0623786	0.0176607	0.00204126	-0.00619524	-0.0110049	0.00563263	-0.00455457	0.00367927	0.00849246	0.0285551	0.0145813	0.0893919	0.0438951	0.00861879	-0.0242823	-0.0234338	-0.00817152	-0.0204799	-0.0128697	-0.0508428	-0.0357768	-0.0420705
M_4mos_CBC.1	0.00714487	-0.0083032	0.0142556	0.0172077	0.0142062	0.0172895	0.0311884	-0.0103992	-0.016304	-0.013045	0.00944707	-0.0146117	0.0203768	0.178893	0.0204061	0.0773899	-0.0015984	-0.00637922	0.0486728	0.0506269	-0.0032678	-0.00163643	-0.0103971	0.0858688	0.0130787	-0.00235377	0.00245631	-0.0288264	0.00950672	-0.0173178	-0.00940024	0.0664062	0.0352984	-0.0190308	-0.000432458	-0.0221411	-7.04925e-05	-0.0164935	0.0183936	0.00582804	-0.0232803
M_4mos_DFC.1	-0.00957716	-0.00649369	-0.00751831	-0.0182266	-0.00919318	-0.0246478	0.0409949	-0.0149034	-0.0219408	-0.0194898	-0.00796274	-0.0328385	-0.0134038	-0.00912812	-0.0115365	-0.0277317	-0.0294845	-0.00957382	0.0260432	0.0587057	0.00632628	0.00354433	-0.00536217	-0.00894789	0.00639928	-0.00247053	0.00426132	-0.00014033	0.0323508	0.0201811	0.10311	0.06917	0.0220693	-0.0274729	-0.025788	-0.0149333	-0.0268362	-0.0135028	-0.0393524	-0.0313264	-0.03654
M_4mos_VFC.1	-0.00516617	-0.00632998	-0.00423547	0.028655	-0.003806	-0.0148758	0.0428607	-0.0127016	-0.0162625	-0.0163801	0.00189526	-0.0262742	-0.0114887	-0.0100276	-0.0086327	-0.0286436	-0.026659	-0.00627539	0.0283597	0.0565097	0.0182623	-5.35536e-07	-0.00611988	-0.00968194	0.00524535	-0.00242248	0.00735894	-0.000714502	0.0256661	0.00652629	0.0776755	0.0422747	0.00724572	-0.0231743	-0.0235811	-0.0135243	-0.0185305	-0.0149001	-0.0405038	-0.0351194	-0.0341968
M_10mos_S1C	-0.00369699	-0.0104514	0.0093747	-0.0265313	-0.00343485	-0.0419597	-0.0444246	-0.013321	-0.0238393	-0.0118764	-0.00954775	-0.0319445	-0.0144693	-0.0162105	0.0517822	-0.0461197	-0.0307483	0.00542408	0.0357462	0.0804947	0.0625281	-0.000505991	-0.0141556	-0.0177409	0.00206996	-0.0119923	-0.00811933	0.032147	0.0488631	0.000941666	0.0263622	-0.00686565	-0.0298065	-0.0223755	-0.0225365	0.0105541	-0.0155855	-0.0182335	-0.0597545	-0.050769	-0.0311283
M_10mos_IPC	-0.00194721	-0.00964167	0.00766251	-0.022405	-0.00470077	-0.0348472	-0.0354264	0.00321218	-0.0108238	-0.00721149	-0.00724688	-0.0291482	-0.00386412	0.010439	0.151921	-0.00780728	-0.0175722	-0.00294437	0.0437497	0.0782291	0.044875	-0.00168337	-0.0140119	-0.00993593	-0.00125185	-0.012025	-0.00998976	0.0059645	0.0321572	-0.00671257	0.00818401	0.00339126	-0.0176553	-0.00368818	-0.0181945	0.000735319	-0.0133164	-0.0205615	-0.0339678	-0.0414684	-0.0167463
M_10mos_STC	-0.00472774	-0.00822893	-0.000756904	-0.0292714	-0.00342187	-0.0262206	-0.0144178	-0.00909514	-0.0149425	-0.0126993	0.000515529	-0.0176982	-0.00851247	-0.0142296	0.10454	-0.0313515	-0.0159625	-0.000843563	0.0240346	0.0559671	0.0316739	-0.00255137	-0.0145996	-0.0154863	-0.00449855	-0.0139319	-0.0100997	0.00310753	0.0317778	-0.00060775	0.00879875	-0.000345872	-0.023065	-0.0151597	-0.0205207	-0.00588503	-0.0218024	-0.0207761	-0.0453626	-0.0437099	-0.0142295
M_10mos_DFC	-0.00713107	-0.00712861	-0.00752604	-0.0350675	-0.0166099	-0.0431712	-0.0353423	-0.00945667	-0.0159687	-0.00134627	-0.0101532	-0.0335375	-0.0102009	-0.0173508	0.053161	-0.0434712	-0.0304833	0.00585581	0.0561898	0.0987191	0.0676329	0.000154165	-0.0157444	-0.0171957	0.00232761	-0.0136315	-0.00716664	0.0107168	0.0417786	-0.00830182	0.0303421	0.00633809	-0.0198737	0.00577942	-0.0241506	0.0049035	-0.0100344	-0.0212614	-0.0572703	-0.0524967	-0.0272808
M_10mos_OFC	-0.00690643	-0.00742002	-0.00559153	-0.028042	-0.0106816	-0.025264	-0.0181446	-0.00469411	-0.013339	-0.00496903	0.000474975	-0.0193577	-0.00653288	-0.0171884	0.105289	-0.0369648	-0.0183781	-0.00318484	0.0132604	0.0433717	0.0507824	-0.00337176	-0.013464	-0.0150323	-0.00610852	-0.0162701	-0.00948693	0.017434	0.0271682	-0.00780161	0.0245629	-0.0232893	-0.0333979	-0.0194399	-0.0187467	0.00674729	-0.0183255	-0.0200418	-0.0456925	-0.0464254	-0.0162398
M_10mos_MFC	-0.00290697	0.00369741	-0.00853551	-0.0383776	-0.00929788	-0.0258968	-0.00729442	0.00420811	-0.0141755	-0.00205868	0.000779428	-0.0230846	-0.00252159	-0.00798003	0.21638	0.0189508	0.0313137	0.00405928	0.0001354	0.0428251	0.0152722	0.0021581	-0.0112814	-0.01015	0.00237247	-0.0107344	-0.00296024	-0.00961201	0.0337327	0.00627952	0.0272131	0.0207509	-0.0129013	-0.0204	-0.022943	-0.01882	-0.0330694	-0.0188695	-0.00165685	-0.034787	0.00972191
M_10mos_CBC	0.00280444	-0.00901955	-0.0180788	-0.0432645	-0.0212555	-0.0246406	-0.0374086	0.0119003	0.00438496	0.00758555	-0.0199125	-0.0253311	0.0233672	0.174835	0.852427	0.233203	0.0775548	0.00754259	-0.0536167	-0.0305035	-0.0434716	-0.0188336	-0.0241061	0.0223223	-0.0182996	-0.0173704	-0.0162228	-0.0123839	-0.0121504	-0.00768788	-0.043919	-7.92538e-05	-0.0096265	-0.01787	-0.00349148	-0.0238871	-0.038934	-0.0234747	0.114867	0.017898	0.0670968
M_10mos_ITC	-0.00908766	-0.00845533	-0.0140103	-0.0471277	-0.0206809	-0.0350123	-0.00851717	-0.00155623	-0.00442147	-0.0103704	-0.00376907	-0.0310961	-0.00630898	-0.0172908	0.0946382	-0.0338671	-0.0191649	0.0139972	0.0309217	0.0673006	0.0383438	-0.000208096	-0.013518	-0.015374	-0.00497816	-0.0166677	-0.00519585	-0.00571641	0.0297194	-0.0151085	0.0160192	0.0092043	-0.016645	-0.00409041	-0.0246482	-0.00707381	-0.0203578	-0.0224125	-0.0484081	-0.0492285	-0.0145017
M_10mos_MD	-0.00442405	-0.00523658	-0.0157282	-0.0510413	-0.0191043	-0.0248022	-0.0180881	-0.00853122	-0.00938157	-0.00949651	0.00775695	-0.0116946	-0.0123056	-0.00770563	0.0950438	-0.0322279	-0.0216208	-0.00206621	0.0719235	0.0913504	0.0611598	-0.00676472	-0.00324404	-0.0055223	0.205211	0.0426766	0.0664036	-0.0146627	0.0211153	-0.0341962	-0.021354	0.0175831	-0.0123557	-0.0161869	-0.021682	-0.00885732	-0.0198069	-0.0354462	-0.0529646	-0.0491917	-0.0195804
M_10mos_V1C	-0.0107903	-0.00879428	-0.0146464	-0.0504491	-0.0219146	-0.046627	-0.0331664	-0.00156585	-0.00668123	-0.0014204	-0.0154706	-0.0332385	-0.00965718	-0.0138344	0.102911	-0.0279252	-0.0116734	-0.00418403	0.0225121	0.0640093	0.0256397	0.00279401	-0.0131713	-0.0197206	0.00657302	-0.0128041	-0.00988868	-0.00437794	0.0427882	0.0147255	0.0132123	0.0277222	-0.0160906	-0.0144988	-0.0264583	-0.0123863	-0.0251991	-0.0218851	-0.0395944	-0.0441601	-0.0160652
F_1yrs_AMY	0.0223066	0.0557094	-0.0099623	0.0721828	-0.00460399	-0.00361133	0.0141293	-0.0113192	-0.0136963	-0.0142861	0.00744021	0.0176997	-0.00668616	-0.00759985	-0.0107606	-0.0262507	-0.00989785	-0.0119304	-0.0262388	0.00799487	-0.00840503	0.00936632	-0.00164993	-0.00250341	0.00840853	-0.00527986	-0.00713361	0.0228016	0.0440304	0.0722516	0.0201681	0.0130264	-0.027895	-0.0306717	-0.0207494	-0.02387	-0.0426401	-0.0130696	-0.0314317	-0.0230823	-0.0145822
F_1yrs_M1C	0.0041547	-0.00427399	0.000371875	0.0482105	-0.00628836	-0.0411885	-0.0161123	-0.00180343	-0.0110938	-0.000672767	-0.0152448	-0.0116279	0.0199102	-0.00780319	-0.00275152	-0.0301308	-0.0111191	-0.00363782	-0.0519312	0.000126904	-0.0418187	0.00757001	-0.00235355	-0.00458288	0.0112829	-0.00165887	-0.000644012	0.00347231	0.0498434	0.101763	0.0387598	0.0231626	-0.0286011	-0.0111997	-0.0350703	-0.0431761	-0.0538447	-0.0130167	-0.0407238	-0.0317303	0.0280701
F_1yrs_DFC	-0.00459777	-0.00739506	-0.00610617	0.0637936	-0.00708535	-0.0351958	-0.00127418	-0.00934099	-0.0202237	-0.016904	-0.0124987	-0.0218814	-0.00984181	-0.00888628	-0.0157898	-0.0290652	-0.0115112	-0.0137844	-0.0283009	0.0204261	-0.0153567	0.00743902	-0.00333174	-0.00869494	0.0142535	-0.00212788	-0.003279	0.0323358	0.0723564	0.134056	0.067812	0.0370665	-0.0227185	-0.0295387	-0.0287059	-0.0257965	-0.0482435	-0.00737776	-0.0324436	-0.0223268	-0.0229501
F_1yrs_STC	-0.0036565	-0.00978345	-0.00506431	0.0545592	-0.0116987	-0.0333679	-0.00939771	-0.0115738	-0.018617	-0.0166787	-0.0147411	-0.00717849	-0.00908517	-0.0102516	-0.0117564	-0.0352962	-0.0136963	-0.0175136	-0.0480373	-0.00491244	-0.0187973	0.00340937	-0.00464907	-0.0090563	0.00866644	-0.0058252	-0.00956418	0.051195	0.061597	0.131844	0.0584804	0.00812961	-0.034728	-0.0320654	-0.0253277	-0.0181245	-0.0519881	-0.00572622	-0.0313787	-0.0205159	-0.0237762
F_1yrs_V1C	-0.00573673	-0.00126465	-0.00996128	0.0180628	-0.0131518	-0.0375971	-0.0204168	-0.0121328	-0.0201637	-0.0165723	-0.0182136	-0.0142825	-0.00743811	-0.00818142	-0.0153454	-0.0323339	-0.00996253	-0.00808211	-0.0501138	-0.00621601	-0.0110083	0.00353387	-0.00496367	-0.00950514	0.0118367	-0.00410691	-0.00945142	0.0626196	0.0718353	0.139546	0.0550766	0.00175642	-0.0386445	-0.032377	-0.0245784	-0.0117061	-0.0532496	-0.00477968	-0.0277665	-0.0208489	-0.0224463
F_1yrs_MFC	-0.0011987	-0.00303581	-0.00479634	0.0539879	-0.00530901	-0.0203397	-0.000442688	-0.00908477	-0.0119459	-0.0159338	-0.00502608	0.0195879	-0.00323254	-0.00815029	-0.00789007	-0.0299237	-0.0108554	-0.00568085	-0.0444445	-0.00409279	-0.0248752	0.00191237	-0.00678916	-0.00635818	0.00934792	-0.00303971	-0.0033608	0.0315946	0.0487491	0.100745	0.0413305	0.0092125	-0.0316628	-0.0307945	-0.0251627	-0.0264072	-0.0497298	-0.00931747	-0.0313356	-0.0220749	-0.0136502
F_1yrs_OFC	-0.000370352	-0.00818689	-0.0012748	0.133303	0.00298249	-0.0185479	0.00909599	-0.0101548	-0.0214641	-0.0189027	0.00356272	0.0131948	-0.0109466	-0.00573689	-0.0154071	-0.0305518	-0.0177326	-0.0120246	-0.00561632	0.0303079	0.00680622	0.00780614	-0.00258214	-0.00792291	0.0138644	-0.00179881	-0.00333864	0.0221624	0.0599842	0.0921138	0.0565206	0.0236648	-0.0216565	-0.0258853	-0.0234495	-0.0209863	-0.0345049	-0.0108146	-0.0339371	-0.0238814	-0.0319879
F_1yrs_ITC	-0.002329	-0.00737883	-0.00498036	0.0461411	-0.00984801	-0.0304229	-0.0026666	-0.00949149	-0.0215167	-0.0151489	-0.0119259	-0.0112002	-0.0110103	-0.0093937	-0.0117101	-0.0311418	-0.00989076	-0.0133484	-0.0451801	-0.00290071	-0.00839155	0.00582526	-0.00190885	-0.00805408	0.00962252	-0.00356989	-0.00617151	0.0565444	0.0641928	0.124306	0.0679091	0.00237401	-0.0344987	-0.0307673	-0.0230059	-0.0122963	-0.0508277	-0.00670357	-0.0259594	-0.0207862	-0.0238868
F_1yrs_S1C	-0.0055485	-0.0124858	-0.00453712	0.059283	-0.0071657	-0.0363712	-0.0126829	-0.013169	-0.0173178	-0.0203806	-0.0148212	-0.00778699	-0.0122572	-0.00907075	-0.017037	-0.0405528	-0.0236865	-0.00959951	-0.0374133	0.00725542	-0.0211177	0.00489471	-0.00627514	-0.010742	0.0100968	-0.00541931	-0.00971701	0.0407802	0.0686281	0.136062	0.0513438	0.027809	-0.0290113	-0.0295781	-0.0278901	-0.0243219	-0.0509477	-0.00650656	-0.0386051	-0.022482	-0.0320597
F_1yrs_VFC	-4.36655e-05	-0.00848064	-0.000126021	0.0686697	-0.00535922	-0.0331441	-0.0116272	-0.0129895	-0.0184747	-0.0160149	-0.0128354	-0.00443421	-0.0109778	-0.00930283	-0.0139137	-0.0370466	-0.0164446	-0.0111567	-0.0481202	4.06012e-05	-0.01732	0.0025938	-0.0043509	-0.00836541	0.0123421	-0.00255949	-0.0061504	0.0529606	0.0652398	0.132292	0.0628213	0.0125407	-0.0320227	-0.0328059	-0.0253694	-0.0181081	-0.0532896	-0.0043114	-0.0334686	-0.0225239	-0.0270889
F_1yrs_CBC	0.00756516	-0.0173251	-0.00111207	0.078994	0.00392507	-0.00594269	-0.00907609	-0.0105228	-0.0244479	-0.0152058	-0.00105966	-0.0108854	-0.00386264	0.21574	0.00952165	0.0178522	-0.0051461	-0.0024994	-0.0319191	-0.0116216	-0.0126679	-0.0120321	-0.0145765	0.0410752	0.0116375	-0.00745348	-0.0126898	0.0477066	0.0235598	0.042462	-0.00788012	-0.00853367	-0.0247864	-0.0295801	-0.0039713	-0.00275948	-0.0365741	-0.0111493	0.0156155	0.0121003	-0.0170673
F_1yrs_A1C	-0.00543493	-0.0121038	-0.00984121	0.0498192	-0.0112892	-0.0385544	-0.0147061	-0.00708026	-0.0165389	-0.0139144	-0.0169044	-0.016704	-0.00958499	-0.0103155	-0.0118515	-0.033523	-0.0107075	-0.00635948	-0.0415493	0.00437172	-0.0122251	0.00284536	-0.00650623	-0.0113691	0.00630184	-0.00423475	-0.00949632	0.047329	0.064243	0.12492	0.0519011	0.0131997	-0.0327936	-0.0312928	-0.0276171	-0.019183	-0.0505617	-0.00645925	-0.0329096	-0.0245344	-0.0213309
F_1yrs_MD	0.0152475	0.019937	-0.0072825	-0.0103707	-0.0104993	-0.00392554	0.00281457	-0.00455145	-0.0141101	-0.0101364	0.0117151	-0.00331684	-0.00205433	0.00257117	-0.00670448	-0.022496	0.00339972	-0.00684182	-0.030684	0.0033263	0.000910544	0.00177551	0.00798236	0.00809961	0.27688	0.0616717	0.0434435	0.0381662	0.0422868	0.0557199	0.0198116	-0.000416297	-0.0360324	-0.0102298	-0.0203997	-0.0174399	-0.0499067	-0.0191129	-0.0251064	-0.0251009	-0.0100697
F_1yrs_HIP	0.167419	0.067332	0.0155012	0.0835119	0.0114987	0.00601085	-0.000359327	-0.0149806	-0.0169521	-0.0126611	0.0145396	0.0302285	-0.00450738	-0.00154765	-0.0144477	-0.0268758	-0.00445253	0.00254303	-0.0375405	-0.0078677	-0.00166444	0.0207252	0.00493077	0.00486255	0.0495306	0.00210457	-0.00163889	0.0437839	0.0419557	0.0679214	0.0132417	-0.0128213	-0.0379931	-0.0314768	-0.0147275	-0.0144991	-0.0465146	-0.0107591	-0.0236794	-0.020602	-0.0117999
F_1yrs_IPC	-0.0039011	-0.00914902	-0.00481724	0.0510093	-0.0121093	-0.0369065	-0.0153766	-0.0114138	-0.0250291	-0.0186689	-0.0166759	-0.0176348	-0.0131756	-0.0114425	-0.0186821	-0.0409316	-0.018171	-0.0107031	-0.0415837	0.00109166	0.00105547	0.00489969	-0.00270049	-0.00857704	0.0104075	-0.00628143	-0.00815093	0.0649603	0.0726511	0.128986	0.0708208	5.6076e-06	-0.0371048	-0.0296654	-0.0225552	-0.0065593	-0.0495302	-0.00580011	-0.0306571	-0.0216711	-0.033742
F_1yrs_STR	-0.000554176	0.00858175	-0.0101943	-0.00805337	-0.0076508	-0.00887713	0.0220983	-0.012365	-0.00546554	-0.0115351	0.00817754	0.00693134	-0.00677079	-0.00496212	-0.0116833	-0.0275269	-0.00668872	-0.0144965	-0.0280138	0.00312681	-0.00680015	0.377575	0.0767528	-0.000682595	0.0216174	-0.00500046	-0.00686339	0.0181984	0.0350569	0.0576148	-0.00377212	0.00359702	-0.0304818	-0.0309248	-0.0211246	-0.0249633	-0.0446285	-0.0138061	-0.0292996	-0.0233571	-0.00843448
F_2yrs_VFC	0.00169201	-0.0116146	0.00825564	0.00195282	0.0200947	0.0241636	0.037438	0.0157167	0.121841	0.269856	0.0939511	0.056938	0.0134819	-0.0127991	-0.0046578	0.0152746	0.011518	0.00964978	-0.00115569	0.00299462	-0.0189613	-0.0153834	-0.0257076	-0.0164523	-0.02184	-0.0189272	-0.0142702	-0.11784	-0.0501304	-0.0821871	-0.0720929	-0.0416657	-0.0268291	-0.0120269	-0.0387869	-0.0752229	-0.00701714	-0.0430802	-0.0383483	-0.060183	0.0723562
F_2yrs_IPC	-0.00621112	-0.0157157	-0.0082036	-0.0378997	-0.0101501	0.00960604	0.0239943	0.0301051	0.190386	0.305694	0.0565595	0.016409	0.0174185	-0.0206602	-0.00501824	0.00512983	0.020637	0.00410314	-0.0719769	-0.051571	-0.0685124	-0.0197199	-0.0283611	-0.018837	-0.0284361	-0.0241047	-0.022576	-0.110657	-0.0613775	-0.0787021	-0.0786896	-0.0687221	-0.0486109	-0.0180473	-0.0453966	-0.083595	-0.046822	-0.0445095	-0.0439782	-0.062201	0.12007
F_2yrs_S1C	-6.50249e-05	-0.0152192	0.00117583	-0.0125933	0.00823406	0.0266566	0.0436925	0.0069663	0.141516	0.176735	0.0782823	0.0707379	0.0118993	-0.0135939	-0.00969715	0.0145849	0.0178318	-0.00173895	-0.0347653	-0.0198353	-0.0515567	-0.018668	-0.0250606	-0.0171681	-0.0220911	-0.0182647	-0.0169526	-0.112532	-0.0522017	-0.0763885	-0.0775264	-0.0428574	-0.0329629	-0.0219492	-0.0403876	-0.0815436	-0.0306843	-0.0434868	-0.0397272	-0.0558936	0.07168
F_2yrs_MD	-0.000502796	-0.00349519	-0.00351814	-0.0409413	-0.0038076	0.0156047	0.026933	0.0303254	0.182709	0.209078	0.0725142	0.0374358	0.00873684	-0.0201745	-0.0100087	-0.013964	-0.0059169	0.017455	-0.0569969	-0.0478453	-0.0513714	-0.0220662	-0.0218885	-0.00749295	-0.0204012	-0.0159864	-0.0144815	-0.108455	-0.0645832	-0.0852245	-0.0838193	-0.0809648	-0.0519552	-0.014642	-0.0441396	-0.0786245	-0.0358193	-0.0455677	-0.0523241	-0.0651	0.0780858
F_2yrs_DFC	0.000254899	-0.0115453	0.000495596	0.00951572	0.010906	0.0301986	0.048604	0.00318255	0.101553	0.207746	0.0927655	0.0445091	0.0158159	-0.0124065	-0.00328525	0.00491705	-0.000511151	0.00583798	-0.00464176	0.0045702	-0.0153541	-0.01578	-0.0244475	-0.0150567	-0.0227618	-0.0219509	-0.0143608	-0.110298	-0.04951	-0.0824157	-0.0697446	-0.0446797	-0.0298496	-0.0169918	-0.0364568	-0.070418	-0.00976755	-0.0427183	-0.0395282	-0.0596488	0.0749416
F_2yrs_CBC	-0.00529465	-0.0128546	-0.000414235	-0.0344186	-0.00976672	-0.0181758	-0.0232221	0.0992592	0.235432	0.132459	0.0246546	-0.0125193	0.0170163	0.0918563	0.00130585	0.0426073	0.00306812	0.0307249	-0.0253541	-0.0201331	-0.027666	-0.0249527	-0.0260134	0.00902315	-0.0251098	-0.019998	-0.0213	-0.099253	-0.0509145	-0.0805142	-0.0717436	-0.0586759	-0.0342104	-0.0112071	-0.0357478	-0.058735	-0.0207481	-0.0424311	-0.0226168	-0.0549518	0.0992401
F_2yrs_HIP	0.0544843	0.120966	0.000833988	-0.0277597	0.00755917	0.00872694	-0.00659453	0.0211466	0.171868	0.249723	0.0661667	0.0786993	0.0139862	-0.0139393	-0.00455068	0.00330809	0.00816917	-0.00173924	-0.0109953	-0.0114021	-0.0252335	-0.0158502	-0.0251881	-0.016997	-0.0256887	-0.0217089	-0.0156847	-0.117992	-0.0570548	-0.0867266	-0.0784438	-0.0562552	-0.0366084	0.00932561	-0.0402938	-0.0741962	0.000327379	-0.0450496	-0.043358	-0.0641702	0.0647117
F_2yrs_V1C	-0.000647407	-0.0150332	0.00504322	-0.014823	0.00591977	0.0100064	0.0105213	0.0132237	0.166845	0.588823	0.0784247	0.0359842	0.00873279	-0.0142581	-0.00892725	6.21195e-06	-0.00275997	0.0065973	-0.015855	-0.00893406	-0.0341045	-0.0190673	-0.0250181	-0.0202503	-0.0252288	-0.0176532	-0.0147146	-0.115206	-0.0544689	-0.0830106	-0.0733527	-0.0543978	-0.0325336	-0.0181088	-0.0418308	-0.0744446	-0.0276929	-0.0449527	-0.0463185	-0.0647113	0.0658741
F_2yrs_STC	-0.00631333	-0.0165329	-0.00854332	-0.0367188	-0.00831881	0.013919	0.0337964	0.00607474	0.168137	0.172855	0.0584917	0.00525875	0.004984	-0.0236998	-0.00962894	-0.0226812	-0.00588201	-0.00275174	-0.0681273	-0.0492662	-0.0617867	-0.0219819	-0.0286019	-0.0199695	-0.0289449	-0.0229625	-0.0220416	-0.106436	-0.0612296	-0.0809833	-0.0799962	-0.0715316	-0.0509227	-0.0166196	-0.0442487	-0.0790829	-0.0415437	-0.0459223	-0.0547043	-0.0632482	0.0792432
F_3yrs_STR	0.00224065	0.0185438	0.00315252	0.00517779	0.0248348	0.0325932	0.039724	0.00230286	0.0950473	0.0628761	0.0792616	0.133484	0.0080094	-0.00945135	0.022982	-0.000826198	0.00731213	0.0666684	-0.024904	-0.0134106	-0.0460087	0.0285763	-0.0108795	-0.00731925	-0.015438	-0.0137379	-0.0151541	-0.0876524	-0.0428898	-0.0622955	-0.069652	-0.0440254	-0.0319279	-0.00686475	-0.0309899	-0.0715802	-0.0214805	-0.0379985	-0.0428211	-0.0435352	0.0428961
F_3yrs_STC	0.002731	-0.0119352	0.0105335	0.0122899	0.022759	0.0422812	0.0950385	-0.00658524	0.00493308	-0.0036259	0.0933609	-0.00317158	-0.00740135	-0.00998148	0.00525547	-0.0246135	-0.0190769	0.00442577	0.0625816	0.0946434	0.0138136	-0.00338872	-0.01425	-0.0138796	-0.00328384	-0.0137772	-0.0126326	-0.0666813	-0.000790756	-0.048878	-0.0274188	0.00629899	-0.0124815	-0.0135105	-0.0301208	-0.0529019	-0.0100455	-0.0313833	-0.0598186	-0.0489715	-0.0129378
F_3yrs_IPC	-0.000900842	-0.0141591	0.0113915	0.0238368	0.0173401	0.0450272	0.0352133	-0.00762176	0.0171146	0.00829948	0.0898352	0.00751845	-0.0110896	-0.0143966	-0.00420947	-0.0474588	-0.0294571	0.0115262	0.0356085	0.0417239	0.0584205	-0.00991533	-0.0182272	-0.0143556	-0.00601498	-0.0149348	-0.0156032	-0.0296444	-0.0116923	-0.0495185	-0.0251373	-0.0681117	-0.0451366	-0.0118971	-0.0194047	-0.0211066	0.00789754	-0.0295217	-0.0656053	-0.0505753	-0.0180699
F_3yrs_ITC	-0.00397994	-0.0130473	-0.00646347	0.0454937	0.0177169	0.0537564	0.125305	-0.00863698	0.0123113	0.0110017	0.0985459	-0.00619358	-0.00802485	-0.0111838	0.00324577	-0.0298913	-0.0236003	0.012811	0.0446844	0.0711667	0.012412	-0.00704466	-0.016845	-0.0133719	-0.00704588	-0.016095	-0.0135169	-0.0627674	-0.0091513	-0.0524182	-0.0301111	-0.00757406	-0.0182427	-0.00701027	-0.0277242	-0.0487086	-0.00456166	-0.0311344	-0.0581243	-0.04714	-0.0112791
F_3yrs_CBC	0.000965428	-0.00911747	-0.0203559	-0.0371251	-0.0172183	-0.0215634	-0.00841796	0.00522847	0.00231692	0.0298498	-0.00118134	-0.0110327	0.0500648	0.229545	0.156114	0.224713	0.101929	0.00174649	-0.0401252	-0.0105524	-0.0525431	-0.0179501	-0.0219255	0.0201201	-0.00584604	-0.015113	-0.0144367	-0.0509181	0.00179919	-0.0110928	-0.0420341	0.0347234	-0.00520383	-0.019684	-0.0262437	-0.0581376	-0.039607	-0.027331	0.0713534	-0.000647974	0.143227
F_3yrs_AMY	-0.00401034	-0.0082076	0.00450036	0.0210862	0.029404	0.0407527	0.0506761	0.0132784	0.0756624	0.0719279	0.0956226	0.0574149	0.0139856	-0.0100193	0.0132538	-0.0182891	-0.00762443	0.0580793	-0.0122659	-0.00360871	-0.0212778	-0.0101033	-0.0165047	-0.00630101	-0.0141165	-0.00977972	-0.0124401	-0.0751497	-0.0384358	-0.064605	-0.0570828	-0.0539323	-0.0357455	-0.00471733	-0.0273759	-0.0567921	-0.00102855	-0.0364207	-0.0468444	-0.0462875	0.0712084
F_3yrs_VFC	-0.00170832	-0.0103629	0.00677272	0.0693892	0.0285901	0.0599758	0.0607835	-0.00417221	0.0090965	-0.00460043	0.115245	-0.0142194	-0.00943155	-0.0125494	-0.00105383	-0.0454558	-0.0333946	0.000331889	0.0762759	0.087325	0.0789908	-0.00596426	-0.0164336	-0.0106682	-0.00888421	-0.0140215	-0.0103088	-0.0341026	-0.0089908	-0.0535345	-0.0178613	-0.0574617	-0.0354806	0.0211385	-0.0173589	-0.0191873	0.0179064	-0.0298816	-0.06653	-0.0513107	-0.0244727
F_3yrs_M1C	-0.00262374	-0.0125627	-0.00597747	0.0134948	0.00890948	0.0538215	0.0834345	-0.00795649	0.00748527	-0.0074148	0.0897382	-0.00880023	-0.00798422	-0.0152395	-0.00202407	-0.0410305	-0.0279333	-0.0010062	0.0233691	0.0481464	0.0400801	-0.00972843	-0.0176588	-0.0124024	-0.00801087	-0.0125803	-0.0112624	-0.0342693	-0.00623937	-0.0406332	-0.0229657	-0.0412874	-0.0371764	-0.0176282	-0.0205421	-0.0295627	-0.00583533	-0.0288309	-0.0604491	-0.0470417	-0.0174525
F_3yrs_A1C	-0.002405	-0.0113327	0.000711346	0.022452	0.0245878	0.0197386	0.0561464	-0.00145962	0.0248503	0.00441267	0.0958083	-0.0169409	-0.00837647	-0.013138	0.00497943	-0.0303122	-0.0234049	0.00609068	0.100241	0.113447	0.0443323	-0.00353557	-0.016952	-0.0163866	-0.0062039	-0.0143867	-0.0114982	-0.0824006	-0.00662963	-0.0624159	-0.0314779	-0.0109486	-0.0138807	-0.0120833	-0.0350866	-0.0514309	0.0088972	-0.0367077	-0.0644488	-0.0592448	-0.00138584
F_3yrs_MD	0.00565866	-0.00217614	-0.00498243	-0.0153722	0.0159553	0.0368182	0.0594206	0.00830222	0.0371162	0.0193282	0.0871338	0.105733	0.00355208	0.00235821	0.0316554	0.0367643	0.0317021	0.0474553	0.0130584	0.0377429	-0.0305211	-0.00789025	-0.00533299	0.00284478	0.0707631	0.00580317	0.0170502	-0.0943327	-0.0196021	-0.0594192	-0.0534303	0.0190964	-0.00344393	-0.0216704	-0.033161	-0.0745104	-0.0313482	-0.0381646	-0.0246759	-0.0410572	0.0346415
F_3yrs_V1C	-0.00130576	-0.0152308	0.00328306	0.0237348	0.0238124	0.0512475	0.0897214	-0.0124726	-0.00168578	-0.000369708	0.0933108	0.0134816	-0.0081131	-0.011413	0.00139979	-0.0318688	-0.0239787	0.000227032	0.0400813	0.0665122	0.0140494	-0.00536554	-0.016249	-0.013235	-0.00327899	-0.0100752	-0.0156901	-0.0483028	-0.00088094	-0.042359	-0.0279435	-0.00920484	-0.0230316	-0.0216487	-0.025166	-0.0440028	-0.0140638	-0.0291522	-0.0597315	-0.0440349	-0.0215963
M_3yrs_OFC	0.00484772	-0.00564749	0.0144302	0.0154371	0.00367228	0.0501152	0.0864282	0.0759703	0.0898436	0.0436362	0.077155	0.0371704	0.017366	-0.00583866	0.0182406	0.0304804	0.0388497	0.0284809	-0.0268508	-0.00369603	-0.0293887	-0.00973146	-0.017148	-0.00949248	-0.00760633	-0.00931329	-0.0126109	-0.0704589	-0.0233838	-0.0465417	-0.0425635	-0.0250419	-0.0248808	-0.0129204	-0.023264	-0.0575096	-0.04206	-0.0327083	-0.0137109	-0.0373191	0.072884
M_3yrs_MFC	0.0055935	-0.00664883	0.0192203	0.0255784	0.0138761	0.0694004	0.112067	0.0235512	0.0871122	0.042785	0.0951558	0.0219526	0.0106342	-0.00993286	0.00843302	-0.000972273	0.0104376	0.00625184	-0.0372587	-0.0209235	-0.0337487	-0.014647	-0.0215003	-0.00755692	-0.0112535	-0.0122884	-0.0165434	-0.0684943	-0.0349625	-0.0535268	-0.0552834	-0.0512413	-0.0373685	-0.0183249	-0.0209932	-0.0551071	-0.0384022	-0.0337706	-0.0271632	-0.0367242	0.0464304
M_3yrs_M1C	0.00507112	-0.0111408	0.0191949	0.000333351	0.0135711	0.0890194	0.141368	-0.00420191	0.0444756	0.0391922	0.115907	0.0402928	-0.00197692	-0.00918409	0.00584648	-0.0120115	-0.00636021	-0.00392707	-0.0160597	0.000675735	-0.0193353	-0.0130306	-0.0193611	-0.00859865	-0.00957669	-0.0121697	-0.0153837	-0.0621561	-0.0320618	-0.0561802	-0.052318	-0.0386147	-0.0284746	-0.0169643	-0.0152147	-0.0480961	-0.0333255	-0.0328266	-0.0366978	-0.0376621	0.0173902
M_3yrs_S1C	0.00691848	-0.00570866	0.0144334	0.0291328	0.014496	0.0797338	0.114333	0.0240206	0.0569821	0.039004	0.110639	0.0480334	0.0119006	-0.00196482	0.0210431	0.035527	0.0312778	-0.000259079	-0.0229412	-0.00369834	-0.0282828	-0.0105789	-0.0175004	-0.00658258	-0.00594997	-0.00833069	-0.00467379	-0.0738911	-0.0300802	-0.0551114	-0.051305	-0.0265204	-0.0222384	-0.0174033	-0.0177716	-0.0560757	-0.0384593	-0.032799	-0.00955763	-0.0352363	0.0545271
M_3yrs_STC	0.00382276	-0.00957807	0.00860354	0.00646174	0.00650956	0.0842002	0.129044	0.000723864	0.0520499	0.0546533	0.102853	0.0337701	-0.00395023	-0.00836534	-0.000501359	-0.0130612	0.0050428	-0.00074619	-0.0320017	-0.0115609	-0.0156344	-0.0127034	-0.0174148	-0.00778865	-0.00955715	-0.0135639	-0.015596	-0.0489815	-0.0281738	-0.04964	-0.0469487	-0.0460642	-0.0356195	-0.0127006	-0.0142913	-0.0414391	-0.0370519	-0.0302755	-0.0329966	-0.0351946	0.0378527
M_3yrs_IPC	0.00877206	-0.004195	0.0209462	0.012617	0.0162635	0.0897912	0.128664	0.0031693	0.049786	0.0441165	0.121924	0.0460801	0.0127435	-0.000146066	0.0217839	0.0456882	0.0408788	0.00783148	-0.0240472	-0.00721879	-0.0263813	-0.00900301	-0.0173943	-0.00367989	-0.00631366	-0.0115818	-0.0109362	-0.0724505	-0.0299335	-0.0537259	-0.0535872	-0.0247827	-0.0217462	-0.0187922	-0.0158133	-0.0566882	-0.0391304	-0.0326931	-0.00415485	-0.0316545	0.0537281
M_3yrs_A1C	0.00390313	-0.00973559	0.0139905	0.0131589	0.0060787	0.0530117	0.0856522	0.0484111	0.114063	0.0444998	0.083502	0.0553436	0.0127087	-0.00990411	0.0161497	0.00228433	0.0105288	0.018354	-0.0279438	-0.015023	-0.0271593	-0.01276	-0.0199913	-0.010199	-0.0122228	-0.0138073	-0.0170259	-0.0715699	-0.033341	-0.0551036	-0.0528687	-0.043321	-0.0318784	-0.0200592	-0.0220888	-0.054031	-0.038587	-0.035246	-0.0309933	-0.0415827	0.0552835
M_3yrs_CBC	0.00161397	-0.0137526	-0.00583041	-0.0297625	-0.0162753	-0.0183542	-0.0119845	-0.00291323	0.00601671	0.0100972	-0.00672005	-0.0148611	0.0192084	0.21145	0.0736983	0.131194	0.0573756	0.013684	-0.040883	-0.0165125	-0.0389943	-0.018279	-0.0209611	0.0197236	-0.00490359	-0.0113592	-0.0181865	-0.0117977	0.0053702	-0.00386525	-0.0337922	0.0127711	-0.00995943	-0.0232052	-0.013075	-0.0311346	-0.0430069	-0.0245511	0.0635156	0.00499345	0.0639836
M_3yrs_V1C	0.00257079	-0.00928023	0.00968796	-0.0104933	0.00216315	0.0527205	0.0485525	0.0599133	0.136198	0.0784862	0.0876976	0.0431759	0.0173195	-0.0082851	0.0309379	0.0327549	0.0407011	0.0136453	-0.0548345	-0.039034	-0.0400883	-0.0141159	-0.019916	-0.00950538	-0.0119571	-0.0126361	-0.0178827	-0.0734273	-0.040824	-0.0553884	-0.0632624	-0.0642507	-0.0448565	-0.0208425	-0.0241936	-0.0592498	-0.0486221	-0.036512	-0.0117639	-0.0402955	0.0999429
M_3yrs_AMY	0.000231369	0.00295904	0.000723538	0.0121325	-0.000531854	0.0475591	0.0831593	0.0596979	0.119779	0.0330239	0.0710141	0.064044	-0.00163326	-0.0144783	0.00343039	-0.00459122	0.00611763	0.000229648	-0.0401582	-0.0272828	-0.0340601	-0.0134277	-0.0196229	-0.00704368	-0.0144334	-0.0130496	-0.0154612	-0.0723827	-0.0399547	-0.0583249	-0.057097	-0.0535914	-0.0368607	-0.00759285	-0.0233386	-0.0545081	-0.033487	-0.0360555	-0.0336596	-0.04095	0.0628528
M_3yrs_VFC	0.0039466	-0.0049923	0.00788912	0.0296108	0.00257293	0.0299861	0.0663971	0.0263866	0.0962053	0.0438749	0.0694016	0.106875	0.0125039	-0.00696471	0.0368665	0.0572775	0.0502988	0.00921636	-0.0178977	-0.00158339	-0.0329477	-0.0117536	-0.0193766	-0.0112505	-0.012946	-0.0153297	-0.0110165	-0.0955025	-0.0316106	-0.060947	-0.0556555	-0.0140901	-0.0158728	-0.0170917	-0.0281438	-0.0681892	-0.0344865	-0.0373473	-0.0101558	-0.0426878	0.0521411
M_3yrs_DFC	-0.0044577	-0.0145629	-0.00633146	-0.00852502	-0.0136108	0.0203488	0.0570122	0.856827	0.247082	0.0221158	0.0428506	0.0385737	0.00132541	-0.0178734	0.0192436	0.00122447	0.0140633	-0.00171076	-0.0694467	-0.0358814	-0.0670725	-0.0161673	-0.0239703	-0.01454	-0.0177019	-0.0207608	-0.0189976	-0.0809351	-0.0385839	-0.052566	-0.0589441	-0.0424443	-0.0398659	0.00264905	-0.037142	-0.0718694	-0.0566307	-0.0389925	-0.0388128	-0.0480914	0.0564579
M_3yrs_HIP	0.0232379	0.060213	0.00493134	-0.0176132	0.0021134	0.0382057	0.0232663	0.0639459	0.147203	0.0473343	0.0565257	0.138654	0.00642476	-0.0131403	0.0119017	-0.00378799	0.015231	0.00482618	-0.0539882	-0.0435974	-0.0421485	-0.0165429	-0.022382	-0.00845108	-0.0175622	-0.0171861	-0.0172966	-0.0663528	-0.0424824	-0.0576158	-0.0666954	-0.0642069	-0.0469348	-0.0168704	-0.0205681	-0.0539661	-0.0383634	-0.0364268	-0.0274752	-0.0385064	0.0471735
M_3yrs_ITC	0.0024787	-0.00597019	0.00713932	0.0197781	0.00203452	0.0785919	0.129276	0.0130611	0.0510459	0.0396007	0.0981784	0.0217572	0.00671509	0.00330027	0.017544	0.0312517	0.0338381	0.00405841	-0.0387009	-0.0193894	-0.0242874	-0.00830509	-0.0162672	-0.000694603	-0.00937426	-0.00919144	-0.0118945	-0.0562103	-0.0295794	-0.0473347	-0.0475296	-0.0439983	-0.033352	-0.00763479	-0.0146701	-0.0479469	-0.0411522	-0.0305748	-0.00482399	-0.0306538	0.0682538
M_4yrs_AMY	-0.00176758	0.0134697	-0.00775412	0.0538239	-0.00229458	-0.0145886	-0.0258992	0.177534	0.0856068	0.016878	0.0425119	0.0255939	0.00291343	-0.00462903	-0.000244121	-0.0168922	-0.0118367	0.0192284	0.128506	0.117436	0.150851	0.0137499	-0.010926	-0.0114811	-0.0032376	-0.0111666	1.2224e-05	-0.0640936	0.00121075	-0.0640335	-0.0214126	-0.0360022	-0.0258212	0.19553	-0.0286329	-0.0177152	0.0434719	-0.0352816	-0.049624	-0.0624986	0.0169053
M_4yrs_STR	-0.000551799	0.00787656	-0.00991291	0.0197663	-0.00597359	-0.00675064	-0.0271601	0.0353095	0.0710236	0.00161714	0.0361723	0.0535655	-0.00193364	-0.00829641	-0.0100607	-0.0232952	-0.00893628	0.00452796	0.0681847	0.0594297	0.131006	0.29709	0.0269328	-0.0102763	0.00400275	-0.014974	-0.00443977	-0.0444703	0.00348591	-0.0554027	-0.038951	-0.0486064	-0.0375495	0.000195695	-0.0206777	-0.00943673	0.0132685	-0.0334192	-0.0442477	-0.0541812	-0.00292083
M_4yrs_VFC	-0.0102991	-0.010678	-0.0131545	0.0326123	-0.02096	-0.036158	-0.0568219	0.190382	0.202358	0.00432454	0.00956938	-0.0107045	-0.000328487	-0.0208916	-0.0140195	-0.040913	-0.0204235	0.00750451	0.0204158	0.0243792	0.100813	-0.00577869	-0.0203146	-0.0186735	-0.00866579	-0.0193748	-0.00693586	-0.0415138	-0.00429415	-0.0563955	-0.0191383	-0.0815237	-0.056526	0.012076	-0.0332946	-0.0162688	-0.00812512	-0.0370776	-0.0576272	-0.0665561	-0.00564783
M_4yrs_DFC	-0.00918403	-0.00596317	-0.0126688	0.0480193	-0.0128595	-0.0438472	-0.056038	0.182958	0.160981	0.00526299	0.0183942	-0.00309031	-0.00231678	-0.0184933	-0.00955524	-0.0381654	-0.0263514	0.0161021	0.155195	0.152664	0.141034	-0.00345131	-0.0212102	-0.0210194	-0.0128919	-0.0227283	-0.00565742	-0.0892547	-0.0131866	-0.0773464	-0.0407716	-0.0542082	-0.0341773	0.0865526	-0.0426711	-0.0364835	0.0336076	-0.0415047	-0.0699455	-0.075366	-0.00131075
M_4yrs_STC	-0.00260347	-0.000461853	0.00249867	0.0968937	-0.00474776	-0.0191085	-0.0517099	0.0113918	0.0278739	0.0369486	0.0464374	0.0118975	-0.00483069	-0.00809068	-0.00495973	-0.0307834	-0.0156849	0.0425597	0.152196	0.123898	0.254124	0.0168684	-0.00912475	-0.0117703	-0.00312574	-0.0153355	0.00584933	-0.0382977	0.00901745	-0.0594722	-0.00128382	-0.0745118	-0.0441793	0.0529505	-0.0234672	0.0110232	0.0653062	-0.0319431	-0.0490064	-0.0651996	0.00325485
M_4yrs_CBC	0.005452	-0.00524674	-0.00365892	0.00272327	-0.00301998	-0.00243255	-0.0264282	0.0328324	-0.00695043	-0.0027057	0.0252548	-0.00780512	0.00750535	0.226702	0.0261302	0.0592351	0.00655695	0.0271391	0.125752	0.0990299	0.117819	-0.012356	-0.0191954	0.0362023	0.00320103	-0.00211584	5.22174e-05	-0.030008	0.00834148	-0.0531626	-0.0376937	-0.011315	-0.00298442	0.0633367	-0.00447998	0.0131776	0.0365524	-0.0292936	0.00248396	-0.0246213	0.00764377
M_4yrs_MD	0.00321543	0.00194963	-0.00439271	0.0298585	-0.00386849	0.00446967	-0.0147585	-0.00170361	-0.00529157	-0.00317428	0.0450902	0.0224555	-0.00727684	0.00355892	-0.00137267	-0.0239559	-0.00535073	0.0108069	0.072765	0.0713679	0.136547	0.00154746	-0.000767983	0.0014471	0.229563	0.0367424	0.0848721	-0.00790202	0.0229259	-0.0368084	-0.00790152	-0.0335717	-0.0356292	-0.0122091	-0.0159637	0.00358469	-0.00832675	-0.0313519	-0.0403789	-0.0476762	-0.0124452
M_8yrs_ITC	-0.00197503	0.0010405	-0.00439695	0.103821	0.0203387	0.0140562	-0.0356056	-0.0136658	-0.00941002	-0.00381893	0.0619117	0.00782669	-0.00637549	-0.00859335	-0.00127848	-0.0277457	-0.00687732	0.0114392	0.0440894	0.05937	0.164454	0.00334885	-0.00923851	-0.00928362	-0.00412343	-0.0164597	-0.00883812	0.00911467	0.0236309	-0.032435	-0.0166944	-0.0794929	-0.0572335	-0.00872322	-0.0136805	0.0172151	0.0127941	-0.0274219	-0.0372598	-0.0525747	-0.00440572
M_8yrs_S1C	-0.000202668	0.00263641	-0.00316236	0.0481002	0.0204755	-0.00667628	-0.0555685	-0.00992614	-0.0112257	-0.00681923	0.0535162	0.0116847	0.000445917	-0.000585655	-0.00495828	-0.0163093	-0.00354318	0.0116916	0.134227	0.155136	0.183422	0.0074478	-0.0104536	-0.0124533	0.00368792	-0.011714	-0.0046178	-0.0123243	0.0372832	-0.0424571	-0.0195232	-0.0488184	-0.03753	-0.0122984	-0.0192965	0.00727303	0.0240894	-0.0300201	-0.0420857	-0.0558054	-0.0114474
M_8yrs_IPC	0.00190888	0.00235761	0.0089113	0.0935065	0.0352673	0.0113253	-0.0408064	-0.0105697	-0.01196	-0.0058818	0.0692081	-0.00940076	-0.00572255	-0.00284835	-0.000651733	-0.0254596	-0.0132395	0.0065079	0.106844	0.135687	0.174368	0.0102988	-0.00860907	-0.00745848	0.00519562	-0.0103556	-0.00148289	-0.00302621	0.0371543	-0.0373204	-0.0132212	-0.0481983	-0.0387206	-0.00904844	-0.0154438	0.0134779	0.0172241	-0.0291237	-0.0417458	-0.0546118	-0.0264133
M_8yrs_V1C	-0.00250712	-0.000764772	-0.00679855	0.00747457	0.0120451	0.009938	-0.0387311	-0.00948762	-0.0126307	-0.00733581	0.0578631	0.0030292	-0.0101278	0.00145582	-0.00193398	-0.0167666	0.00157807	0.0205094	0.067274	0.089624	0.139134	0.00137552	-0.0064379	-0.0102167	0.00558223	-0.0108807	-0.00727415	0.00320384	0.0396826	-0.0303681	-0.0173861	-0.0484339	-0.0435202	-0.0124983	-0.0160795	0.00829401	0.00534556	-0.0268748	-0.0324493	-0.0474095	-0.0162998
M_8yrs_STC	-0.001107	0.00264882	0.00195747	0.0696435	0.023918	2.37417e-05	-0.04155	-0.011147	-0.0112941	-0.0107201	0.0531944	-0.00949107	-0.00312012	-0.00628133	-0.00780631	-0.0288563	-0.0120727	0.0113821	0.0913394	0.117636	0.162903	0.00693148	-0.0101794	-0.0136675	0.00436979	-0.0115632	-0.00633843	0.00158471	0.0411356	-0.0301587	-0.00861399	-0.04974	-0.0413524	-0.00188782	-0.0182912	0.0123365	0.0139041	-0.0280323	-0.0437938	-0.0538147	-0.012263
M_8yrs_MD	-0.000180901	0.00540884	-0.00976624	0.0749243	0.0144557	0.00141111	-0.0190207	0.00506727	-0.0153087	-0.00307919	0.0323852	0.0324225	-0.0025561	-0.000318122	0.0154349	-0.021098	0.0092214	-0.00296485	-0.0127825	0.017629	0.0353248	-0.000271193	-0.00217275	-0.00164096	0.223327	0.0381916	0.0408086	0.0172961	0.0348022	0.0119887	-0.0152547	-0.0369114	-0.0467016	-0.0280285	-0.0192819	-0.0163379	-0.0393521	-0.0277247	-0.0283775	-0.033433	0.00347401
M_8yrs_VFC	0.00125091	0.00324971	-0.00427347	0.0877171	0.0299195	0.00866875	-0.0317078	-0.00328275	-0.0119872	-0.00143726	0.0634965	-0.00340467	-0.00561529	-0.00509244	0.000245202	-0.0200356	-0.00231632	0.00652643	0.0891149	0.107634	0.144115	0.0079587	-0.00783567	-0.0114705	0.00601497	-0.0130695	-0.00291382	-0.0170402	0.0361014	-0.0243668	-0.0189374	-0.0447507	-0.0424794	0.00129277	-0.0203667	-0.00474102	0.0170717	-0.0286547	-0.0362734	-0.0501041	-0.00209255
M_8yrs_HIP	0.00371713	0.0045837	-0.00793384	0.0246886	0.00941519	-0.000535737	-0.00806308	-0.0047911	-0.0103657	-0.0025734	0.033418	0.0515277	0.00212859	-0.00433898	0.0142317	-0.00558866	0.0283441	0.00017091	-0.000264798	0.0260154	0.046827	0.00782881	-0.00831168	-0.00659439	0.0357648	-0.00956696	-0.00982734	-0.00102222	0.0287863	-0.00466863	-0.0131577	-0.0320823	-0.0432408	-0.0229191	-0.0219533	-0.0182787	-0.0282312	-0.0249648	-0.0195339	-0.0367662	0.0197358
M_8yrs_AMY	0.00158327	0.00882069	-0.0078596	0.0550545	0.0119412	0.00796245	-0.0129808	-0.00169172	0.00582859	0.00856589	0.0432916	0.0882245	-0.00339012	-0.00902782	0.00891975	-0.00827824	0.0253912	0.00653829	-0.0136061	0.00604491	0.0583004	0.00663172	-0.00776441	-0.0102288	-0.00244613	-0.0130805	-0.00455545	-0.0173023	0.00738839	-0.0299929	-0.0261808	-0.0627182	-0.0527719	-0.0164138	-0.0192873	-0.0175237	-0.0130805	-0.0295585	-0.0176088	-0.0423541	0.0351742
M_8yrs_M1C	0.00162522	0.00423511	0.00154091	0.0462592	0.0231775	-0.0126446	-0.0517763	-0.000175612	-0.00925899	0.00284278	0.0468748	0.0241725	0.00193482	-0.00170084	0.00590501	-0.020328	-0.00903415	0.0214506	0.125322	0.152868	0.169865	0.00567626	-0.00896926	-0.0111527	0.0013998	-0.00657469	0.0035524	-0.0211201	0.0350472	-0.0402552	-0.0161813	-0.0450587	-0.0370134	-0.00984235	-0.0225575	0.00136364	0.0185862	-0.0296158	-0.0434957	-0.0566436	-0.00098644
M_8yrs_CBC	0.0113696	-0.00324129	-0.000439107	-0.00208816	0.0178928	-0.00271061	-0.0232464	-0.00856449	-0.00921228	-6.15961e-05	0.0364189	-0.00417528	0.0040917	0.222145	0.0953881	0.0729753	0.0104759	0.033066	0.10425	0.106276	0.0481353	-0.0151528	-0.0158884	0.0222082	0.00473573	0.00899527	-0.00604494	-0.0372002	0.00650553	-0.0441994	-0.0460944	-0.00369855	-0.00208653	-0.0140811	-0.0121269	-0.0182399	0.0198593	-0.030043	0.00681089	-0.0216682	0.0145402
M_8yrs_DFC	0.00209738	0.00134111	-0.00792455	0.0679091	0.0178768	0.00468255	-0.016344	-0.00771224	-0.0171606	-0.00486473	0.0447476	0.0282462	0.00839027	-0.00605757	0.00314845	-0.0136725	0.00582913	-0.00117313	0.0107598	0.0437228	0.0578231	0.00384829	-0.00796091	-0.0088687	0.00253183	-0.0111951	-0.00633296	-0.0111014	0.0377611	-0.00309231	-0.0146142	-0.0361968	-0.043295	-0.0184644	-0.0226981	-0.0188937	-0.0179488	-0.0266908	-0.0305237	-0.0421873	0.00755552
M_8yrs_STR	0.00949267	0.04689	-0.000917931	0.05564	0.0304507	0.0155167	-0.0181527	-0.00969043	-0.00387713	-2.77904e-05	0.0651841	0.0391329	0.00574889	0.0017763	0.00274862	-0.00428835	0.0105734	0.0137934	0.0751227	0.086437	0.111616	0.287303	0.0399147	-0.0035667	0.0071067	-0.0127014	-0.000838626	-0.020259	0.0178244	-0.0378401	-0.0368897	-0.0459046	-0.0373122	-0.0207326	-0.0145553	-0.00722505	0.011079	-0.0304063	-0.0273762	-0.0445281	0.00479624
M_8yrs_A1C	-0.000816179	0.000892308	-0.00546598	0.0349294	0.0167137	-0.0074118	-0.0440409	-0.0121636	-0.0163478	-0.011928	0.0441196	0.00843816	-0.00282496	-0.00269799	-0.00227102	-0.0164859	-0.00313116	0.0164445	0.0906735	0.119938	0.139039	0.00436026	-0.0101973	-0.0129894	0.00192314	-0.0112555	-0.00211901	0.000738053	0.0457947	-0.0282204	-0.00977186	-0.0396587	-0.0381526	-0.0167401	-0.0200085	0.00513628	0.0043408	-0.0275461	-0.0373526	-0.0516034	-0.0156953
M_8yrs_MFC	0.00695975	0.0113265	-0.00358252	0.0778783	0.0335325	0.00980221	-0.0186104	-0.0120586	-0.00992881	-0.0014077	0.0641982	0.00380425	-0.00211739	-0.00314049	0.0116426	-0.0132671	-0.00513426	0.0117035	0.0802691	0.110711	0.112062	0.00499755	-0.00841379	-0.00440715	0.00189589	-0.00828757	-0.00254892	-0.0301708	0.0228592	-0.0402833	-0.0222275	-0.0302795	-0.0324504	0.00712621	-0.0221285	-0.0126002	0.00566121	-0.0297687	-0.0407585	-0.0540156	0.00761628
M_8yrs_OFC	0.000433571	0.000530498	-0.00388778	0.045983	0.0137756	0.000249305	-0.0130863	0.000129274	-0.0108781	0.00109726	0.0404581	0.0175461	0.000402727	-0.0075166	0.00304726	-0.0100594	0.00525442	0.00603923	0.0173616	0.0595404	0.0517113	0.00295134	-0.0104475	-0.0115127	0.00386202	-0.0119022	-0.00840536	-0.00918061	0.0401791	-0.00718861	-0.00981068	-0.016651	-0.0356002	-0.0206296	-0.0231769	-0.0187477	-0.0212868	-0.0253088	-0.0314359	-0.0444215	0.00440651
M_8yrs_MFC.1	0.00949459	0.00495223	0.00466356	0.0446287	-0.0152203	-0.0476914	-0.0522644	0.0100577	-0.00443399	0.0172038	-0.0128972	-0.0319461	0.0587805	-0.0164024	-0.000596771	-0.0507107	-0.0220737	0.00649609	-0.0525352	-0.00841796	-0.0120883	0.0039891	-0.00607066	-0.00548592	0.00128167	-0.00336443	0.000642262	-0.00381439	0.00654049	-0.0178046	-0.0188407	-0.0793316	-0.0643132	0.024792	-0.0366329	-0.032109	-0.0442197	-0.0287491	-0.0739456	-0.0635269	0.304052
M_8yrs_CBC.1	0.00106246	-0.0183672	-0.0116908	0.0230613	-0.0106018	-0.0128158	0.0295934	-0.01126	-0.0162595	-0.0138756	-0.00278934	-0.00663675	-0.00771966	0.2076	0.013903	0.0260809	-0.011979	-0.00552389	-0.0301418	0.00221153	-0.0537178	-0.0142072	-0.0172987	0.041422	0.000871883	-0.00874614	-0.0124637	-0.0176532	0.0215266	0.0250989	-0.0260816	0.0544359	0.00505191	-0.0144551	-0.0222475	-0.0454441	-0.0435863	-0.0175399	-0.0118868	0.000499604	-0.0297679
M_8yrs_A1C.1	-0.00659386	-0.0152361	-0.012052	0.104121	-0.0115993	-0.0202764	0.01159	-0.0129687	-0.019066	-0.0169432	0.00102631	0.0511866	-0.013623	-0.00908118	-0.0063967	-0.0395192	-0.0258667	-0.00111667	-0.0402864	0.0089701	-0.0323642	-0.000643101	-0.00907584	-0.013246	0.00288973	-0.00638775	-0.00978516	-0.00182748	0.048599	0.0695313	0.00664878	0.0230557	-0.0294278	-0.0231229	-0.030536	-0.0425387	-0.0500068	-0.0168558	-0.051615	-0.0334806	-0.0338885
M_8yrs_VFC.1	-0.00792502	-0.0146622	-0.00870747	0.0584382	-0.0156028	-0.0419941	-0.0148259	-0.0154821	-0.0271688	-0.0215858	-0.0125611	-0.00212796	-0.0147176	-0.0148908	-0.0207443	-0.0573281	-0.0398861	-0.00916438	0.00620379	0.0569874	0.0171832	-0.00290664	-0.0127256	-0.0151008	0.00369673	-0.0129681	-0.0103404	0.0352502	0.0637186	0.0380871	0.0320487	0.00500315	-0.0354755	-0.0209791	-0.0306089	-0.0150834	-0.0400289	-0.0171364	-0.0724194	-0.0464161	-0.0482334
M_8yrs_HIP.1	0.029242	0.0112278	-0.00452887	0.0844918	-0.00598216	0.0018854	-0.000353554	-0.0117737	-0.0214388	-0.017747	0.0165776	0.0246901	-0.0134672	-0.0110008	-0.0171952	-0.0562601	-0.0353513	-0.00174244	-0.0131296	0.00855928	0.0427558	0.00757579	-0.00783008	-0.00197501	0.0033823	-0.0104798	-0.0147926	0.0647263	0.0378339	0.0269698	-0.00380744	-0.0366157	-0.0497477	-0.0175099	-0.0119167	0.00970596	-0.0342526	-0.0168009	-0.0612571	-0.0374745	-0.0365228
M_8yrs_AMY.1	-0.00282692	-0.00938717	-0.0116475	0.0420803	-0.0118455	-0.0126389	0.04034	-0.0178608	-0.0194767	-0.0131298	0.0100102	0.0271014	-0.016905	-0.0125172	-0.0152609	-0.0505777	-0.0363621	-0.0127424	0.00542217	0.0425686	-0.0020909	0.0131572	0.000658394	-0.00769619	0.00425382	-0.00373082	-0.0136256	0.00654866	0.0377174	0.0156525	0.00407703	0.0154308	-0.0273006	-0.0104583	-0.027966	-0.0263056	-0.0353546	-0.0210251	-0.0661742	-0.0415373	-0.0469792
M_8yrs_V1C.1	-0.0032497	-0.0187902	-0.00511243	0.0251452	-0.0165648	-0.0450439	-0.0249489	-0.0077351	-0.0150007	-0.0152127	-0.0167879	-0.0128969	-0.015554	-0.00927756	-0.0187267	-0.0542768	-0.0403081	-0.0078191	-0.0197227	0.0230408	-0.0104141	-0.000625867	-0.0127203	-0.0118933	0.00487243	-0.00928613	-0.0147623	0.0257275	0.0621994	0.0607036	0.00524836	0.0104836	-0.0352157	-0.00152017	-0.031257	-0.023598	-0.0447038	-0.0158118	-0.0650058	-0.0394757	-0.0305504
M_8yrs_IPC.1	-0.00696275	-0.0177697	-0.00947675	0.0680218	-0.0143539	-0.0149135	0.000411009	-0.015967	-0.0224245	-0.0231809	0.00292848	0.0582726	-0.0166583	-0.0158132	-0.0191784	-0.0558101	-0.0348508	-0.00782576	-0.0346167	0.00327614	-0.000734286	-0.00584097	-0.0118319	-0.0129424	-0.00111548	-0.0134032	-0.0219921	0.0367173	0.0413721	0.0495184	0.00556578	-0.0273133	-0.0486873	-0.0182792	-0.0232631	-0.0161198	-0.040438	-0.0180819	-0.0625167	-0.038141	-0.0432339
M_8yrs_DFC.1	0.00764552	0.000424301	0.0061842	0.0475525	-0.0122999	-0.0494908	-0.0356246	0.00443881	-0.00733808	0.0162889	-0.0143836	-0.0220374	0.0499892	-0.0155634	-0.00103716	-0.0521013	-0.0280778	0.0215724	-0.0385354	0.00370981	-0.017993	0.0090506	-0.0107777	-0.00219594	-0.000981882	-0.00981291	0.00482853	-0.00813288	0.0191421	0.00210782	-0.00830103	-0.0541425	-0.0552997	0.0172304	-0.0386162	-0.0366429	-0.0471225	-0.0249574	-0.0723838	-0.0579858	0.142142
M_8yrs_STC.1	-0.00836208	-0.0160735	-0.0101167	0.0484532	-0.0119786	-0.0406881	-0.00534023	-0.016388	-0.025499	-0.0217972	-0.0123611	-0.0229641	-0.0155994	-0.0135373	-0.0192699	-0.0557569	-0.0401407	-0.0145371	-0.0144549	0.0432787	-0.00925585	-0.000995887	-0.0110098	-0.0130317	0.0086895	-0.00808474	-0.0138987	0.0235583	0.068862	0.0728173	0.0227545	0.0257164	-0.0305373	-0.024628	-0.0338223	-0.0270366	-0.0455218	-0.015853	-0.071346	-0.0406527	-0.0456574
M_8yrs_ITC.1	-0.006852	-0.0171888	0.00054052	0.105184	-0.0152526	-0.0183282	-0.016396	-0.0170434	-0.0178458	-0.0193909	0.000276322	-0.00155928	-0.00858291	-0.017886	-0.0228121	-0.0622092	-0.0356203	-0.00552039	-0.0727786	-0.0311919	0.0208028	-0.00268979	-0.0140375	-0.00956832	0.000951084	-0.00869337	-0.0124615	0.0723469	0.0381347	0.04013	0.0344653	-0.0721944	-0.0687847	-0.0145369	-0.0229244	0.00336889	-0.0489079	-0.0173853	-0.0627509	-0.0453435	-0.0337569
F_11yrs_VFC	-0.00725965	-0.0115591	-0.0188109	-0.0270139	-0.0220767	-0.0344645	-0.0281628	-0.0144728	-0.0157318	-0.0180681	-0.00478822	-0.00505082	-0.0126273	-0.0153016	-0.0172221	-0.0460475	-0.0243987	-0.00304511	0.00535586	0.0481687	0.0316165	-0.000582727	-0.0149292	-0.0172091	0.00427191	-0.0127312	-0.0138123	0.0247197	0.0604311	0.0309958	0.0186325	-0.00884608	-0.0399009	-0.0232316	-0.0290187	-0.0154831	-0.0325641	-0.0224041	-0.0539407	-0.0425973	-0.024731
F_11yrs_IPC	-0.000989128	-0.0127365	-0.000149933	-0.0171179	-0.0171653	-0.0330676	-0.0434172	-0.0108243	-0.0177948	-0.00784332	-0.00678706	0.0209149	-0.00293964	-0.015428	-0.0123689	-0.0525205	-0.0247565	0.0379553	-0.0289314	0.00880647	0.0289968	-0.00156295	-0.015744	-0.0140041	0.000845765	-0.0112783	-0.0188362	0.0477734	0.0514939	0.027524	0.00853086	-0.046017	-0.0564007	-0.0254596	-0.0244958	-0.00465624	-0.0378469	-0.0215606	-0.0563513	-0.0430281	-0.0100062
F_11yrs_ITC	-0.00664429	-0.0106499	-0.0154909	-0.00158743	-0.0234584	-0.0207807	-0.0533928	-0.0155649	-0.0248222	-0.0218927	0.0084229	-0.0102683	-0.0162028	-0.0199697	-0.0212104	-0.0605119	-0.0347414	-0.00385449	-0.000283383	0.0193613	0.130039	-0.00178659	-0.0152005	-0.0147001	-0.00691551	-0.0129279	-0.0151641	0.0973926	0.0459726	-6.3326e-05	0.02399	-0.0955758	-0.0699277	-0.0222818	-0.0141176	0.0410542	-0.00617096	-0.0204548	-0.0627631	-0.0520349	-0.0369167
F_11yrs_STC	-0.00640312	-0.0109745	-0.00584858	0.00558862	-0.0142335	-0.0198945	-0.0397407	-0.0149964	-0.0195282	-0.0153351	0.0147198	-0.00929566	-0.015126	-0.0140393	-0.0125676	-0.0550623	-0.0294502	-0.00329589	0.0241488	0.0588694	0.0854433	-0.000962212	-0.0131691	-0.0152703	0.000490542	-0.0125148	-0.0134861	0.0479741	0.0494634	0.00344346	0.0128304	-0.0480822	-0.0509481	-0.0226124	-0.020286	0.00896123	-0.00948093	-0.0225395	-0.0628502	-0.0502507	-0.0352895
F_11yrs_S1C	-0.00959441	-0.0145407	-0.0167712	-0.0262258	-0.024785	-0.0332143	-0.0470123	-0.0101088	-0.0186596	-0.0167674	-0.00951488	0.0344908	-0.0129657	-0.0188273	-0.0177092	-0.0534746	-0.0251866	-0.00486641	-0.0265454	0.00772295	0.0445625	-0.00319963	-0.0156305	-0.0139426	-0.00137744	-0.0120817	-0.0164891	0.060369	0.0552182	0.0310517	0.0179368	-0.0550611	-0.0595554	-0.0270729	-0.0224493	0.00295674	-0.033657	-0.020063	-0.0548013	-0.0424637	-0.0258026
F_11yrs_DFC	-0.0076272	-0.0120925	-0.0188228	-0.0258582	-0.0228426	-0.0404112	-0.0271837	-0.0135761	-0.0180914	-0.0198547	-0.0094414	-0.0134564	-0.0086439	-0.0152314	-0.0166479	-0.0495707	-0.0276101	-0.0151337	0.00456593	0.0536924	0.0250265	0.000452405	-0.0160359	-0.0189408	0.00510766	-0.0124107	-0.014823	0.0263631	0.0707769	0.0439509	0.0206783	0.00332428	-0.037228	-0.0261291	-0.0310177	-0.017908	-0.0357426	-0.0218656	-0.0559787	-0.0413186	-0.0316883
F_11yrs_AMY	-0.00135315	0.0090622	-0.018824	-0.0335637	-0.0201359	-0.0102042	-0.00769212	-0.00713194	-0.00886409	-0.00154193	0.0105637	0.0188324	-0.000180772	-0.00156617	0.00277638	-0.0137486	0.0189866	-0.00832173	-0.0263385	0.00301838	0.032108	0.016301	-0.00236323	-0.00162163	0.00279554	-0.00771175	-0.00672064	0.00816604	0.0292488	-0.00167786	-0.00284727	-0.0364739	-0.0433551	-0.0243857	-0.0216958	-0.0142191	-0.035636	-0.0260026	-0.0159036	-0.0350604	0.0430723
F_11yrs_V1C	-0.00860492	-0.0101479	-0.013912	-0.0313635	-0.0211097	-0.0272075	-0.0407386	-0.00904901	-0.0143607	-0.00651776	-0.00368077	0.0626585	-0.00342698	-0.00708915	-0.00483639	-0.0148272	0.0216756	-0.00686382	-0.0348554	0.00778784	0.00587288	-0.00144042	-0.0141635	-0.0146038	0.00639208	-0.013778	-0.012162	0.0133357	0.056045	0.037453	-0.00556848	-0.0138461	-0.0455221	-0.0260459	-0.0265579	-0.0265289	-0.0407253	-0.0229446	-0.0222532	-0.0315849	0.00893403
F_11yrs_CBC	-0.00363318	-0.0148154	-0.0241553	-0.0417661	-0.0287964	-0.0214282	-0.0304061	-0.00142509	-0.0144416	0.00421746	-0.0158255	-0.00440127	0.0154028	0.198363	0.0370872	0.0885977	0.0773517	0.00125212	-0.0741045	-0.044785	-0.0309253	-0.018291	-0.0205846	0.0120225	-0.0083747	-0.0146153	-0.02218	0.0359415	0.012851	0.0303689	-0.0327239	-0.0483044	-0.0481021	-0.0198564	-0.0116609	-0.0159704	-0.0444995	-0.0189146	0.0736646	0.0140731	0.0965236
F_11yrs_A1C	-0.00514783	-0.0127445	-0.00704189	-0.0238038	-0.024833	-0.0362073	-0.0453055	-0.00752049	-0.0170157	-0.0146718	-0.0138591	0.00736784	-0.010466	-0.0158234	-0.0143564	-0.0461684	-0.00900909	0.0116295	-0.0589636	-0.0185699	0.0170982	-0.00275953	-0.0132091	-0.0140083	0.00255747	-0.0114271	-0.0176875	0.0651082	0.0617831	0.0698506	0.0221211	-0.0541194	-0.0615911	-0.0288213	-0.0243426	-0.00409657	-0.0489675	-0.0169352	-0.0380229	-0.0348165	-0.0127498
F_11yrs_HIP	0.00148921	0.0227231	-0.00970417	-0.0061821	-0.0154352	-0.00697408	-0.0482733	-0.0136097	-0.0273261	-0.0205476	0.0228301	0.030142	-0.0113298	-0.0150184	-0.0192315	-0.0574719	-0.0313771	-0.0101881	0.0463929	0.0415244	0.170156	0.00717012	-0.00267644	-0.00391023	0.00028905	-0.0104866	-0.00094515	0.0611152	0.0280191	-0.0302044	0.00400165	-0.0947182	-0.0635447	-0.0184806	-0.00925012	0.0419481	0.0188028	-0.021148	-0.0600494	-0.0515262	-0.0380614
F_11yrs_M1C	-0.00693783	-0.0134684	-0.0137449	-0.0229528	-0.020041	-0.0325841	-0.0375304	-0.0144218	-0.0162648	-0.0152077	-0.00539705	0.0475719	-0.0129903	-0.0158656	-0.0148853	-0.0481204	-0.0231951	-0.00703441	-0.000683291	0.0361516	0.0267286	-0.00375882	-0.0171611	-0.0169817	0.00281716	-0.0119091	-0.0166629	0.0247212	0.0575061	0.0304895	0.00545003	-0.0199914	-0.0452441	-0.0271014	-0.0268942	-0.0172212	-0.0317903	-0.023212	-0.0542431	-0.0400313	-0.0302691
F_11yrs_OFC	-0.0081317	-0.0136469	-0.0165586	-0.0145894	-0.0225849	-0.0232485	-0.0380606	-0.00966476	-0.0172504	-0.0126258	-0.00176616	0.0695205	-0.00810678	-0.0155511	-0.0163144	-0.0441147	-0.0130395	-0.00823249	-0.0259561	0.00511198	0.0287177	-0.00455447	-0.0158632	-0.0152177	-0.0014386	-0.0153496	-0.0176008	0.0427268	0.0456967	0.0299061	0.0102314	-0.0512303	-0.0563716	-0.0257984	-0.0206771	-0.00532466	-0.0351155	-0.0216493	-0.0456031	-0.0365662	-0.0176754
F_11yrs_MFC	-0.00943006	-0.00788507	-0.0184794	-0.031642	-0.0232946	-0.0311714	-0.0279719	-0.0111312	-0.0151082	-0.0160501	-0.00606342	0.0161212	-0.00880639	-0.0152657	-0.0122789	-0.0410134	-0.00892318	-0.00807034	-0.0243565	0.0150908	0.0219143	-0.00147139	-0.0146462	-0.0144444	0.00405299	-0.0133047	-0.0118521	0.0264247	0.0560691	0.0369036	0.0209844	-0.0265195	-0.0461275	-0.0264972	-0.0274195	-0.0156074	-0.0395232	-0.0218462	-0.0415553	-0.0380281	-0.0151753
F_13yrs_MFC	0.00046156	0.000536407	-0.00824905	-0.0110881	-0.00692361	0.00403162	0.0176125	-0.00157686	-0.00236908	0.00910708	0.0280133	0.0450917	0.0259362	-0.00553685	0.0108161	0.022756	0.0630504	-0.00510852	-0.0393912	0.00264223	-0.0102712	0.000109789	-0.0136084	-0.00804574	0.00255028	-0.0102996	-0.00964187	-0.0222072	0.0305227	0.00103664	-0.0109848	-0.00670586	-0.0370075	-0.0248979	-0.0261929	-0.0413086	-0.0445094	-0.0255287	-0.00732695	-0.0327216	0.086518
F_13yrs_IPC	-0.00215957	-0.00659291	-0.00885961	-0.0231315	-0.00839272	-0.0153809	0.0125915	-0.00769951	-0.00180598	0.00395641	0.0159815	0.0145457	0.0112914	-0.00487444	0.00413919	0.0106813	0.032802	-0.00138652	-0.0201313	0.0418361	-0.0273138	0.00368146	-0.0123004	-0.0130517	0.00583199	-0.00940457	-0.0142225	-0.0333522	0.0546488	0.0196517	-0.0125854	0.0615014	-0.0156379	-0.0264906	-0.0345682	-0.0545447	-0.0478867	-0.0252315	-0.0268644	-0.035433	0.0321697
F_13yrs_VFC	-0.00250277	-0.00638037	-0.0115127	-0.0136077	-0.00907359	-0.00771589	-0.00238035	-0.00512009	-0.00823338	-0.00613644	0.0160272	0.0367807	0.00893517	-0.00756221	0.0137064	-0.000496605	0.0363553	-0.0083598	-0.0436351	7.65861e-05	-0.00152523	4.57766e-05	-0.0126661	-0.00954503	0.0053422	-0.0107986	-0.011883	0.00284798	0.051162	0.0283549	-0.00105829	-0.0116914	-0.043416	-0.0260808	-0.0242534	-0.0308588	-0.0462324	-0.0225391	-0.0135542	-0.029245	0.0351897
F_13yrs_A1C	-0.00333028	-0.0060314	-0.00802994	-0.0211251	-0.0094418	-0.00974721	-0.00191939	-0.00621395	-0.00450271	0.0254241	0.0169525	0.0222257	0.0199071	-0.00718504	0.0107787	0.00975467	0.0555718	-0.00569328	-0.053783	-0.008723	-0.014471	-0.00125553	-0.0132562	-0.0104109	0.00172763	-0.013089	-0.0144961	-0.00518403	0.041617	0.0194238	-0.00969089	-0.0137649	-0.0438181	-0.0240423	-0.0273194	-0.0361962	-0.050819	-0.0235163	-0.0122497	-0.0327222	0.0883301
F_13yrs_ITC	-0.00227072	-0.00611216	-0.012978	-0.00670316	-0.00717016	-0.0162855	0.0130959	-0.00709375	-0.0111996	-0.00393913	0.0135638	0.0417716	0.0247789	-0.00657719	0.00398709	0.00839511	0.0365835	-0.0116029	-0.0224927	0.027398	-0.0221303	0.00612603	-0.0112129	-0.0106815	0.00675076	-0.00777213	-0.0127294	-0.0276731	0.0537	0.028829	-0.00618846	0.0360358	-0.0254347	-0.0217371	-0.0334616	-0.0513884	-0.0438152	-0.023534	-0.0242623	-0.0307173	0.038373
F_13yrs_STC	-0.00102118	-0.00542847	-0.00538347	-0.0117589	-0.000277209	-0.0133094	0.0166615	-0.00758776	-0.0152519	-0.000849536	0.0194838	-0.000611026	0.00768572	-0.00460918	0.000978101	0.000341564	0.0289461	-0.00808204	-0.0170295	0.0314923	-0.0075362	0.00755614	-0.00806115	-0.0126113	0.0114851	-0.00919974	-0.00993528	-0.0228616	0.0627756	0.0276472	0.000407148	0.0306122	-0.024825	-0.0262427	-0.0309618	-0.0446784	-0.0412124	-0.0235685	-0.0212195	-0.0312125	0.0192108
F_13yrs_CBC	0.00583556	-0.01441	-0.017149	-0.0363103	-0.0151528	-0.0107789	-0.00759391	-0.00343113	-0.0157053	0.00461063	0.00169636	0.0005115	0.0238345	0.201498	0.0418587	0.076003	0.0416785	0.000316903	-0.0410758	-0.0155339	-0.0225877	-0.0189888	-0.0189435	0.0194706	-0.000379012	-0.00690834	-0.0148649	0.0120419	0.0165518	0.00645483	-0.0323854	-0.0152836	-0.0293936	-0.0250189	-0.0130009	-0.0211367	-0.0375044	-0.0224552	0.0386661	0.00396324	0.0575535
F_13yrs_V1C	-0.0026167	-0.00321761	-0.00960618	-0.0204089	-0.0074402	-0.000801204	-0.0016605	-0.000954034	0.00153723	0.0171393	0.0273476	0.0821584	0.040762	-0.00348713	0.0333505	0.0394199	0.0837608	0.00313131	-0.0379881	0.00120134	-0.0125165	-0.00185448	-0.0159188	-0.0103579	0.000576172	-0.01538	-0.0122203	-0.0325228	0.0265137	-0.00799422	-0.0283878	-0.0130617	-0.0396364	-0.021403	-0.0275202	-0.0458687	-0.0429857	-0.0291463	-0.00176626	-0.0322039	0.119104
F_13yrs_S1C	-0.00157332	-0.00519421	-0.00246776	-0.00786463	-0.000925692	-0.00649025	0.00411671	-0.00550379	-0.00384688	0.00120244	0.0231632	0.00369252	0.0118459	-0.00217635	-0.000548151	0.0037473	0.0305423	-0.00278044	-0.0294462	0.0196038	-0.0107125	0.00330441	-0.0125045	-0.010871	0.0085631	-0.0079602	-0.0138643	-0.0131647	0.0562647	0.0258267	-0.00968179	0.0187521	-0.0317636	-0.025571	-0.0280172	-0.0418642	-0.0455459	-0.0258568	-0.0193412	-0.0311746	0.0344294
F_13yrs_DFC	-0.00237741	-0.00614482	-0.00701424	-0.00964868	-0.00855347	-0.0129159	0.0113632	-0.00898813	-0.00732502	0.00037382	0.0149331	0.000406142	0.00700827	-0.00564279	-0.00210728	-0.0016261	0.0225399	-0.00189655	-0.0324846	0.0275886	-0.0197022	0.00302366	-0.0100127	-0.0110268	0.00592683	-0.0079776	-0.0129064	-0.0135825	0.0594915	0.031755	0.0037328	0.0431956	-0.0233667	-0.0279497	-0.0315775	-0.0439838	-0.0499199	-0.0227285	-0.0267344	-0.0340629	0.0112999
F_13yrs_OFC	-0.00215147	-0.00491594	-0.0118978	-0.0161533	-0.00800334	-0.0132269	0.0163882	-0.0054541	-0.00463744	-0.00367039	0.0168484	0.0136244	0.0153867	-0.0047694	0.00495754	0.00947452	0.0355985	-0.00695387	-0.0235643	0.0328046	-0.0226775	0.00503126	-0.0115918	-0.0116122	0.00348969	-0.00967404	-0.0130417	-0.0292324	0.0536863	0.0206146	-0.00363884	0.0460833	-0.0202384	-0.0265236	-0.0325758	-0.0506113	-0.0468416	-0.0247244	-0.0244914	-0.0343396	0.032441
F_13yrs_MD	0.0304512	0.0134847	0.00692074	0.0090895	0.0154647	0.0442392	0.0832838	0.0150923	0.0430021	0.0167235	0.0857306	0.0577009	0.0266894	0.00462143	0.026158	0.0434402	0.0480009	0.00490989	-0.0110514	0.028878	-0.0339968	-0.00409964	-0.0106903	0.00783058	0.0924594	0.00938213	0.0359018	-0.0813162	-0.00899265	-0.0480258	-0.0515952	0.022104	-0.0125184	-0.00635221	-0.0302501	-0.0719744	-0.0422008	-0.0365266	-0.020645	-0.0389269	0.0718632
F_13yrs_AMY	-0.00154328	0.00179014	-0.00842461	-0.0202411	-0.00719405	0.0151099	0.0321562	-0.00287686	0.0100737	0.0134054	0.0396916	0.0697556	0.0366528	-0.00785223	0.0255757	0.0228533	0.0646496	0.00244343	-0.0434446	-0.00520896	-0.0208294	0.000857477	-0.0128539	-0.00969373	-0.00237433	-0.0112362	-0.00824041	-0.0362383	0.00882503	-0.0132806	-0.0271212	-0.0192256	-0.0393716	-0.0195171	-0.0266732	-0.0484582	-0.0430052	-0.0298332	-0.0112568	-0.0334626	0.106848
F_13yrs_M1C	-0.00446521	-0.00765482	-0.00962427	-0.0163613	-0.00995441	-0.0174651	-0.00261157	-0.00371949	-0.00754895	0.000446417	0.010601	0.00803059	0.00835903	-0.00792906	-0.00287112	-0.00568304	0.0286027	-0.00894229	-0.0395979	0.0116484	-0.010155	0.00208352	-0.0139817	-0.0129014	0.00689002	-0.0100415	-0.0148699	0.00309685	0.0612894	0.0427746	0.00107076	0.00843415	-0.0379686	-0.0283238	-0.0292065	-0.0365496	-0.0495329	-0.0222984	-0.024076	-0.0315324	0.018729
F_13yrs_HIP	0.0374844	0.0157584	0.0069475	-0.00780174	0.011468	0.0411518	0.07305	0.00234907	0.0239966	0.0290047	0.0658542	0.056434	0.033606	-0.006012	0.00900136	0.0103292	0.0438753	0.00573359	-0.0384132	-0.00337067	-0.034567	-0.00125986	-0.0145924	-0.00591284	-0.0027634	-0.0117899	-0.0157362	-0.0586139	-0.0121916	-0.0369627	-0.0448375	-0.0168016	-0.0341297	-0.0224284	-0.026676	-0.0594955	-0.040693	-0.0325832	-0.024006	-0.0372401	0.119569
F_13yrs_STR	0.00284492	0.0175566	-0.00654269	-0.00564517	-0.00303506	0.0208276	0.0296427	0.00476807	0.0171639	0.0247408	0.0454829	0.0825983	0.0343893	-0.00390255	0.0195412	0.0223179	0.071465	0.00485915	-0.0437391	-0.0150786	-0.0175967	0.196276	0.0133439	-0.00447443	0.00130686	-0.0151665	-0.0138909	-0.0387939	-0.00144845	-0.0174126	-0.0459008	-0.0371072	-0.0447787	-0.0214985	-0.0248037	-0.0493497	-0.040509	-0.0316829	-0.00685549	-0.0308553	0.121297
M_15yrs_IPC	-0.00780033	-0.00954282	-0.0143403	0.0246238	-0.0197677	-0.0319018	-0.040882	0.00871381	-0.00658297	-0.0150462	-0.010595	0.0299621	-0.0129724	-0.0114892	-0.00559391	-0.0350894	0.00106275	-0.00605521	-0.0617706	-0.02533	0.0193538	-0.000970986	-0.00872506	-0.0114251	0.00372199	-0.00879548	-0.010555	0.0744246	0.0737104	0.0990683	0.0221562	-0.0464613	-0.0579325	0.0568363	-0.018042	-0.000514435	-0.0488653	-0.0127681	-0.0244388	-0.0274005	-0.0153974
M_15yrs_CBC	0.000918248	-0.0160986	-0.0140442	0.0521251	-0.00593231	-0.017342	-0.0324445	0.0179667	-0.0119092	-0.0117836	-0.00109726	0.0072433	0.000226486	0.232166	0.031681	0.0667919	0.0212161	0.0002209	-0.0244133	-0.00348463	-0.00543782	-0.0153554	-0.0173297	0.0209421	0.00395288	-0.00712834	-0.0106021	0.0255225	0.0257244	0.0220699	-0.0295941	-0.00718577	-0.0222732	0.0234686	-0.0083155	-0.0103958	-0.0281749	-0.0192322	0.0308791	0.00339517	0.00402603
M_15yrs_STC	-0.00808668	-0.00759624	-0.0149388	0.0258272	-0.0192437	-0.0302505	-0.0459414	0.000626907	-0.0209346	-0.0195344	-0.00834298	0.0146449	-0.00924038	-0.0116783	-0.0129127	-0.0358325	0.00100976	-0.00944746	-0.0486669	-0.0150511	0.0533379	0.00163422	-0.00732542	-0.00975958	0.00437803	-0.00967123	-0.0135975	0.0889453	0.0796488	0.0887227	0.0265995	-0.0564765	-0.0601655	-0.0136314	-0.0150362	0.0158186	-0.041072	-0.0110123	-0.0218785	-0.0286946	-0.0295914
M_15yrs_ITC	-0.00304938	-0.00510881	-0.0106685	0.047108	-0.0157238	-0.0296764	-0.0319943	-0.00380488	-0.015413	-0.0109393	-0.006502	0.0157699	-0.00709356	-0.00931927	-0.00632852	-0.0220291	0.0145262	-0.00513424	-0.0496314	-0.0111484	0.0208148	0.00456636	-0.00610161	-0.00890406	0.00509326	-0.00887071	-0.0122331	0.0633268	0.0740212	0.0954594	0.0293055	-0.0310809	-0.0513382	-0.0197641	-0.0198888	-0.00363798	-0.0463583	-0.0123746	-0.0148815	-0.0264792	-0.0129659
M_15yrs_AMY	0.000588599	0.0157252	-0.0145853	0.0307965	-0.0142526	0.00393341	-0.00381321	-0.00447401	-0.013621	-0.0126675	0.0114824	0.0736438	-0.00914032	-0.0077474	-0.00547501	-0.0261776	0.00593351	0.00310442	-0.0611262	-0.0307585	-0.00118115	0.029693	0.00972571	-0.00409473	0.00372335	-0.00329867	-0.0120181	0.0530684	0.044734	0.0699261	0.00431821	-0.0388267	-0.0534311	0.0352239	-0.0140358	-0.011121	-0.0490775	-0.0154501	-0.018631	-0.0203178	-0.00988554
M_18yrs_HIP	0.0691496	0.0593207	0.00291649	-0.0155617	-0.00553987	0.0110816	-0.00730629	0.0815812	0.150022	0.0479881	0.0456545	0.120813	0.00167306	-0.0142256	0.00999905	0.00129869	0.0226412	0.0138276	-0.0567674	-0.0346501	-0.0418296	-0.0110724	-0.0220154	-0.0114	-0.0158119	-0.0215149	-0.016272	-0.081146	-0.0404287	-0.0625666	-0.0661442	-0.0579138	-0.0475644	-0.00759861	-0.0317319	-0.0647304	-0.0404075	-0.0398602	-0.0346844	-0.0523935	0.0493683
M_18yrs_M1C	-0.00367368	-0.00978534	-0.00460974	-0.0161567	-0.0039069	0.0191962	0.00842597	0.0425971	0.139804	0.0573392	0.0657286	0.105417	0.00533935	-0.0123717	0.00346824	0.0129419	0.0260692	0.0166977	-0.0359586	-0.0141447	-0.0350086	-0.0132042	-0.0240777	-0.0138619	-0.0182032	-0.0186411	-0.0163188	-0.0932832	-0.0349516	-0.0678593	-0.066832	-0.0441766	-0.0393354	-0.0162758	-0.0354218	-0.071149	-0.0380036	-0.0413975	-0.0348704	-0.0528171	0.0338885
M_18yrs_V1C	0.000987744	-0.00717498	0.00323997	0.000985264	-0.00559409	0.0455557	0.0315305	0.0169301	0.111071	0.0642232	0.0777836	0.0349341	0.00623936	-0.0108624	-0.00529938	0.0019262	0.0183126	0.0109118	-0.0535032	-0.0306424	-0.0232905	-0.0126476	-0.0203681	-0.0109843	-0.0155021	-0.0163469	-0.0131741	-0.0672783	-0.0322092	-0.056564	-0.0602393	-0.0630907	-0.0494378	-0.0167496	-0.026733	-0.0556143	-0.0433238	-0.037033	-0.0297425	-0.0478649	0.0438806
M_18yrs_A1C	-0.00075648	-0.00764906	0.000375638	-0.0153848	-0.00503436	0.0230265	0.000175933	0.0905381	0.18317	0.0863516	0.069569	0.0844042	0.0108963	-0.0118425	0.000979704	0.0102518	0.0302846	0.0206971	-0.0486642	-0.0299358	-0.0309436	-0.01756	-0.022583	-0.0119374	-0.017455	-0.0176077	-0.0125726	-0.0839506	-0.0400078	-0.0644184	-0.0665081	-0.066511	-0.0491091	0.000530385	-0.0308371	-0.0628332	-0.0372022	-0.0402839	-0.0306397	-0.0514099	0.0457694
M_18yrs_ITC	-0.000207418	-0.00521201	-0.00246762	-0.0112635	-0.00648907	0.0374361	0.0238739	0.000540611	0.0723932	0.049783	0.0708473	0.074555	-0.00112007	-0.00986317	0.00324132	-0.00292212	0.0153555	0.0143307	-0.0316286	-0.00916972	-0.00139879	-0.00896123	-0.0183541	-0.0101241	-0.0121235	-0.0152351	-0.0108314	-0.061172	-0.0214621	-0.0536406	-0.0508748	-0.0492244	-0.042855	-0.0141086	-0.0238235	-0.0474268	-0.0307342	-0.0363634	-0.0318087	-0.0474553	0.0263295
M_18yrs_VFC	-0.000871451	-0.0035918	-0.00398742	-0.00127862	-0.00419653	0.0234761	0.0226915	0.00821228	0.0737667	0.0405874	0.0571986	0.0306102	0.00951205	-0.00711174	0.00791479	0.0149589	0.0331117	0.00608594	-0.0263139	0.00661051	-0.00893045	-0.00531128	-0.0172435	-0.011215	-0.00671664	-0.0131415	-0.00891816	-0.0590614	-0.00155459	-0.0415269	-0.0416643	-0.0172717	-0.0334256	-0.0172275	-0.0282125	-0.0524024	-0.0371635	-0.0353396	-0.0226112	-0.0460301	0.0273448
M_18yrs_MFC	0.00320015	-0.00415181	0.00354875	-0.0193129	-0.00125785	0.0350406	0.0263459	0.0125841	0.14556	0.0866417	0.0735893	0.0209611	0.00766883	-0.0121336	0.00111626	0.00470461	0.0234222	0.0104947	-0.0477601	-0.0213302	-0.029834	-0.0116876	-0.0197498	-0.0114796	-0.0157193	-0.0167273	-0.0136337	-0.0832367	-0.0376351	-0.0644527	-0.0627329	-0.0600013	-0.0467403	-0.013154	-0.0325835	-0.0646264	-0.0352957	-0.0396264	-0.0341059	-0.0529526	0.0395359
M_18yrs_STC	-0.00197607	-0.011713	-0.00355179	-0.0214425	-0.00869885	0.0141695	0.00810659	0.0796054	0.211395	0.0702782	0.0579731	0.0387343	-0.00313147	-0.0154331	-0.00224926	-0.00338515	0.00726644	0.000120913	-0.0521764	-0.0249704	-0.0468949	-0.015512	-0.0256796	-0.0163692	-0.018835	-0.021893	-0.0153694	-0.0957839	-0.0428699	-0.0679475	-0.0703903	-0.0589366	-0.045524	0.000338638	-0.0392731	-0.0736386	-0.039512	-0.04301	-0.0468323	-0.057362	0.0150752
M_18yrs_DFC	-0.00245152	-0.00359906	-0.0091411	-0.00798505	-0.012072	0.0299492	0.0175542	-0.00275294	0.0368276	0.0203851	0.0504896	0.0140781	0.00220768	-0.00918511	-0.00348417	-0.00915773	0.0212807	0.00498679	-0.0458643	-0.00714909	0.00828718	-0.00504357	-0.0144954	-0.00998883	-0.00262213	-0.0116435	-0.0125895	-0.0180329	0.0165974	-0.015534	-0.0215833	-0.0366496	-0.0481112	-0.015804	-0.0212275	-0.0319147	-0.041536	-0.0296182	-0.0235166	-0.0400772	0.0154883
M_18yrs_S1C	-0.00283024	-0.00924085	-0.00500082	-0.00858385	-0.00367217	0.00929176	0.0101482	0.0141977	0.129727	0.066754	0.0548058	0.116309	0.0056835	-0.00988674	0.00418381	0.0262404	0.0312776	0.0122776	-0.025061	-0.00134335	-0.0348453	-0.0141916	-0.0231427	-0.0154868	-0.0165143	-0.0214047	-0.0153354	-0.100517	-0.0316046	-0.068027	-0.0662083	-0.0282872	-0.0313494	-0.0158264	-0.0386316	-0.0750149	-0.0322857	-0.042441	-0.0348049	-0.0530631	0.0298931
M_18yrs_IPC	-0.00342326	-0.00521168	-0.00374617	-0.0159133	-0.00829377	0.0232435	0.0352267	0.0121267	0.105201	0.0523442	0.0605208	0.00573797	0.00644528	-0.0089785	-0.00057081	0.00538996	0.0247161	0.00278647	-0.0345104	0.00306257	-0.0299656	-0.00693875	-0.0198842	-0.0153322	-0.011163	-0.0175985	-0.0130521	-0.077215	-0.0146825	-0.0492588	-0.0502904	-0.0225647	-0.0339092	-0.0209486	-0.0342361	-0.0655285	-0.0404882	-0.0374395	-0.0349845	-0.0496168	0.0367455
M_18yrs_OFC	0.00201189	-0.00166565	-0.00480677	0.000470669	-0.00349707	0.018037	0.0246568	-0.00300346	0.0514825	0.0404426	0.0575519	0.0429234	0.00782428	-0.00638479	0.00340323	0.0155404	0.0281528	0.000600621	-0.000215278	0.0306936	0.00756642	-0.0047694	-0.0180689	-0.0117609	-0.00476266	-0.0135859	-0.00499631	-0.0696531	0.000361794	-0.0470883	-0.03997	-0.0069834	-0.0259366	-0.0148154	-0.0303204	-0.0534303	-0.0240714	-0.0356992	-0.0281009	-0.0482936	0.0268678
M_18yrs_CBC	-0.00130985	-0.0123164	-0.0156411	-0.0333424	-0.0181348	-0.0281274	-0.0284269	0.0452279	0.143188	0.0235754	0.00766115	-0.00471268	0.00838738	0.157769	0.0229176	0.0596663	0.0159969	0.015979	0.00660378	0.0239353	-0.00709937	-0.0201425	-0.0224829	0.00260794	-0.0140567	-0.00232159	-0.010929	-0.0679849	-0.0134231	-0.0562493	-0.054888	-0.00855842	-0.0107705	-0.013814	-0.0286127	-0.0437831	-0.0188032	-0.037727	-0.00639158	-0.0344255	0.0446898
F_19yrs_STC	-0.00741268	-0.00947973	-0.0156839	-0.0189306	-0.0146414	-0.035419	-0.0167527	-0.0133468	-0.022639	-0.0177248	-0.00607017	0.0159001	-0.00668485	-0.00684736	-0.00707488	-0.0134282	0.00431237	-0.0121241	-0.0257478	0.0329616	-0.0150056	0.00438294	-0.0126933	-0.0128241	0.00985354	-0.00368057	-0.0142961	0.00915787	0.0863478	0.0760501	0.00833165	0.0491382	-0.0280103	-0.0258825	-0.0319233	-0.0392098	-0.0475832	-0.0209507	-0.0327432	-0.0286381	-0.0207732
F_19yrs_CBC	0.00260541	-0.0135018	-0.0178197	-0.0264348	-0.0121162	-0.0242298	-0.0148743	-0.00937598	-0.0258775	-0.00823565	-0.00389757	0.00498008	-0.00237745	0.220758	0.0134413	0.0417579	0.00810759	-0.0088225	-0.00783019	0.0210927	-0.0107808	-0.013588	-0.0165844	0.0168308	0.0109559	-0.00580597	-0.0103519	-0.0012584	0.039016	0.00730205	-0.0258256	0.0286803	-0.012457	-0.0260358	-0.0179531	-0.0278715	-0.0298945	-0.0241976	0.00568576	-0.00264547	-0.0135567
F_19yrs_DFC	-0.00437847	-0.00744812	-0.0116566	0.0227147	-0.00637971	-0.0227974	0.00266746	-0.0125473	-0.0259465	-0.017608	0.00628327	0.0286706	-0.0084637	-0.00638691	-0.00880643	-0.0123702	0.00292409	-0.00812617	-0.0118228	0.0431703	-0.0122687	0.00340242	-0.0114846	-0.0122491	0.0101211	-0.00617532	-0.011082	-0.00657969	0.0822391	0.0613855	0.00609681	0.0490285	-0.0226818	-0.0232258	-0.0309214	-0.0432764	-0.0432454	-0.0222065	-0.0318607	-0.027479	-0.0243195
F_19yrs_AMY	0.00167958	0.0121998	-0.0174369	-0.00608647	-0.00417949	-0.0110285	0.0360472	-0.0104329	-0.0213597	-0.0149175	0.0213661	0.0648449	-0.00616609	-0.00282941	-0.000139392	0.00789296	0.00639709	-0.0120138	0.0314263	0.0832115	-0.0138935	0.0296888	-0.00660986	-0.00519667	0.014791	-0.00203437	-0.00145571	-0.0551371	0.0578153	0.00240971	-0.014398	0.102079	0.00217922	-0.0276275	-0.0341861	-0.0599502	-0.031233	-0.0294698	-0.0373111	-0.033481	-0.0241003
F_19yrs_OFC	-0.00387368	-0.00927413	-0.0141001	0.0234393	-0.0119158	-0.0190899	-0.0027709	-0.0116007	-0.0272641	-0.0160208	0.00510626	0.0398332	-0.0083412	-0.00743815	-0.0136812	-0.020814	-0.0027746	-0.0120726	-0.0222822	0.0233553	-0.00280004	0.00221267	-0.0113215	-0.00990299	0.00714346	-0.00794229	-0.0115755	0.00744071	0.0746979	0.0577426	0.00860372	0.0207826	-0.0327812	-0.0299535	-0.026905	-0.0339975	-0.0434638	-0.0211375	-0.0302807	-0.0271965	-0.0225404
F_19yrs_ITC	-0.00338591	-0.00808118	-0.0151741	0.0167808	-0.00577236	-0.0215983	0.00798903	-0.0112894	-0.0199981	-0.010888	0.00961617	0.0750498	-0.00754436	-0.00597743	-0.00980209	0.00258158	0.00986124	-0.00982637	0.00503446	0.0575198	-0.0106448	0.00391284	-0.0139456	-0.0104522	0.00504161	-0.00944295	-0.00948745	-0.0313603	0.0639702	0.0208421	-0.00452381	0.0762348	-0.0122629	-0.0255332	-0.0330778	-0.0507852	-0.0382507	-0.026952	-0.0357464	-0.0334735	-0.0209188
F_19yrs_STR	0.00646131	0.0128481	-0.00963749	0.0209465	-0.00677346	0.0204861	-0.00360976	-0.00955551	-0.0129446	-0.00704177	0.0283488	0.117005	-0.00229103	-0.00270783	-0.00726405	-0.0075217	0.0406439	-0.008717	-0.0630705	-0.033621	-0.00701437	0.287504	0.0329957	0.00168995	0.0117128	-0.00868085	-0.013602	0.0346155	0.0247886	0.0450051	-0.0248635	-0.0585198	-0.0613315	-0.0274826	-0.0117823	-0.0208242	-0.0495393	-0.0196386	-0.00294943	-0.0159996	0.0147817
[truncated: 102 more rows]
