# Supplementary material for: Spatiotemporal Brain Transcriptomics Reveal Risk Gene Hot-Spots in Major Neuropsychiatric Disorders
Source: Research Square preprint supplement (doi:10.21203/rs.3.rs-7667905/v1), 2025-10-08
Supplement: Supplementary file 3 [file Supplemental Table 11. Data supporting Fig. S5, Spatiotemporal expression and risk gene enrichment of 32 modules.xlsx]

## Sheet: spatiotemporal regression_B
	Tha @ Young Adult (Intercept)	Neocortex	Striatum	Ganglionic_eminence	Amygdala	Hippocampus	Brain_stem	Cerebellum	Early prenatal	Early mid-prenatal	Late mid-prenatal	Late prenatal	Early infancy	Late infancy	Early childhood	Late childhood	Adolescence	Middle adulthood
MEroyalblue	0.00505875	-0.0155503	0.00989631	0.00455499	0.0137061	0.0638918	0.00511891	-0.00499215	-0.0136336	-0.00655589	0.0106499	0.0438457	0.0166369	0.00255524	-0.00156108	-0.00246353	0.000358044	0.00418212
MEsalmon	0.0026334	-0.0158049	-0.00243711	-0.00601426	-0.00442559	0.00460734	0.00716761	-0.00988151	-0.000561668	-0.00470651	0.00161403	0.168078	0.0160421	0.0011188	0.014239	0.00699553	0.00153835	-0.0045134
MElightcyan	-0.0119664	-0.00989957	0.0113127	0.0788247	0.0270008	0.037734	0.00362226	0.00801298	0.0299969	-9.74864e-05	-0.000286899	0.0793072	0.0295634	-0.0115107	0.0421422	-0.00149132	0.0104693	-0.01351
MEyellowgreen	-0.014831	-0.00646775	0.00976754	-0.0110338	0.0153598	0.0100882	0.0484403	-0.0129888	-0.0127939	0.00896528	0.0407237	0.0986571	0.0755071	0.00696253	0.0625731	-0.00724483	0.0222984	-0.037142
MEorangered4	-0.00620393	0.0060273	0.00449348	0.0077889	0.00654595	0.00511335	0.0109862	0.00565446	-0.010042	-0.00588017	0.00143249	-0.0034852	-0.00425701	-0.00659814	0.0515519	-0.0087342	0.00441264	-0.000812071
MEsteelblue	-0.00856181	0.00104388	0.00516192	0.00556344	0.000102109	0.00825184	0.0117555	-0.00199175	-0.0138314	-0.00875577	-0.000881662	0.00856065	0.0071613	-0.00742325	0.0951625	-0.00757949	0.0296676	0.0199651
MEviolet	-0.00174482	-0.00234003	-0.00248879	0.0065923	-0.00550847	0.00349736	-8.10038e-05	-0.00774377	-0.0163126	-0.0107922	0.00495067	0.0103574	3.61632e-05	-0.0068333	0.0811324	-0.00453743	0.0153308	0.0130783
MEbrown	0.0220282	-0.0149085	0.00295065	0.00322314	0.000883319	0.00588873	-0.00150704	-0.0204361	-0.0510861	-0.0526148	-0.0420694	0.0519114	0.0185983	-0.0157464	0.0602144	0.00807016	0.0150146	0.00401055
MEtan	0.061521	-0.0167568	0.0201801	-0.00603796	0.00460838	0.00568952	-0.00636595	-0.0315215	-0.0862121	-0.0860617	-0.0833352	-0.0559097	-0.0637919	-0.0593855	-0.0157538	-0.0331793	-0.00629944	-0.018705
MEsaddlebrown	-0.00259247	-0.00143183	0.00447025	0.0102576	0.00282205	0.00160496	0.00769181	0.0411939	-0.0106867	-0.00310473	-0.00125897	0.0542151	0.00106046	-0.00573858	0.004923	-0.00325026	0.00525466	-0.00354196
MEgreenyellow	0.00949916	-0.0101027	-0.00209849	-0.00310522	-0.00669899	-0.00569755	0.015128	0.143954	-0.0209858	-0.0199948	-0.0196132	-0.00641747	-0.00458001	-0.00574193	-0.0071569	-0.00553085	-0.00272835	-0.0015456
MEskyblue3	0.00178946	-0.00361495	0.000742543	0.0101542	5.99922e-05	-0.00210855	0.0045978	0.0481567	-0.0176808	-0.0109928	-0.00651656	0.00105221	-0.00255199	0.0607321	0.00687384	-0.0055916	-0.000227774	-0.00583685
MEblack	0.00162246	0.00380268	0.0164235	0.0359685	0.013534	0.00554053	0.0371176	0.0772464	-0.0342612	-0.00599253	0.002758	0.0335709	-0.0106178	-0.0295308	-0.00739774	-0.0405799	-0.00693451	-0.0220313
MEmediumpurple3	-0.00332011	-0.00288484	0.0042364	-0.00117222	-0.000264554	0.00178012	-0.00225819	0.023118	-0.00977016	-0.0093527	-0.00554149	0.00463133	0.00365457	-0.0012428	0.0149903	0.00613816	0.00173897	0.173681
MEdarkgrey	-0.0229435	-0.0121311	-0.00412042	-0.00671608	-0.00732253	-0.00485924	-0.00982917	-0.00280248	0.0411138	0.0410398	0.0553828	0.0530096	0.0483281	0.0191192	0.0382463	0.0448427	0.00242223	0.0492678
MEred	0.00372279	-0.011401	-1.1009e-05	-0.0156214	-0.00910604	-0.0027151	-0.0305367	-0.0172526	-0.00286432	-0.0177948	-0.00426426	-0.00497674	0.0241864	0.0126509	0.0143131	0.0642723	-0.00431111	0.0898797
MEorange	0.00903707	-0.00453985	0.13584	0.00489085	0.00930354	0.00269714	0.0124737	-0.0102724	-0.0306195	-0.0302266	-0.0228509	-0.0166163	0.00256319	0.00558939	-0.0149023	-0.000985314	-0.00236018	0.00767625
MEskyblue	0.00774649	-0.0295461	0.105007	0.0385782	-0.00525498	-0.021273	0.00857748	-0.0185867	0.0198021	0.0188259	0.0219371	0.00796899	0.00880957	0.00801518	-0.00795545	0.00492813	0.000282619	0.000816609
MEwhite	0.00399829	-0.0211885	-0.00973455	-0.0138088	-0.0102992	-0.00763227	0.241885	0.0967944	0.0116851	0.00963051	0.021322	0.0195579	0.00788973	-0.000519561	-0.00592129	-0.00202385	-0.0027219	-0.00405084
MEdarkturquoise	0.144641	-0.132365	-0.123112	-0.123188	-0.128837	-0.125732	-0.101638	-0.125498	-0.0461423	-0.0391065	-0.0291534	-0.0226941	0.00129183	0.00201696	-0.0278205	-0.00865647	-0.0108989	-0.0137654
MEdarkolivegreen	0.107819	-0.125245	-0.103752	-0.130597	-0.116448	-0.117838	-0.0671523	-0.105456	0.0214375	0.0133576	0.0136217	0.00936201	0.00731619	0.00184552	-0.00888745	0.00197194	-6.41091e-05	-0.00649466
MEplum1	0.101604	-0.122117	-0.104294	-0.112839	-0.114198	-0.115659	-0.0310203	-0.107879	0.000724846	0.0195913	0.039356	0.0273638	0.0202157	0.00621059	-0.00137187	0.00659429	0.00297327	0.00297127
MEblue	0.0548154	0.000660939	-0.00918854	-0.00691758	-0.0084668	-0.0107407	0.00960163	-0.00988942	-0.0959434	-0.090826	-0.0800013	-0.075204	-0.0417931	-0.00793939	-0.0782326	-0.0134786	-0.0201158	-0.00833314
MEdarkorange	-0.00160969	-0.00459748	-0.022615	-0.0299944	-0.0179829	-0.0258108	0.0179333	-0.0288939	-0.0121199	0.0186137	0.0826368	0.0255135	0.0428309	0.0387372	-0.0375371	0.0077577	-0.00905383	-0.00984678
MEdarkred	0.0068529	-0.00312993	-0.013011	-0.0202281	-0.0104042	-0.0161645	0.0517858	0.00171049	-0.0189604	0.0204994	0.0333375	0.0156423	0.00645038	0.00483213	-0.0422208	-0.0365613	-0.00391691	-0.0343595
MEmagenta	-0.0357606	-0.00147054	-0.00450747	-0.0104086	-0.0036887	-0.00849396	0.0403354	0.00763946	0.0563521	0.0836911	0.100413	0.064912	0.0307924	0.0102722	0.00583878	-0.00645317	0.00299389	-0.00545032
MEyellow	-0.0342761	0.00612461	0.0132386	0.103836	0.0247012	0.0274327	-0.0243391	0.0232519	0.088718	0.0408491	0.0251137	0.0190964	0.00815832	0.0034561	-0.00313937	0.00150197	-0.00280857	0.00062124
MEgreen	-0.0376839	0.00532219	0.00516105	-0.0124908	0.00246864	0.0043976	-0.0404377	0.0082619	0.0989583	0.0650194	0.052697	0.00566235	0.0154441	0.0186901	-0.0163401	0.0237424	-0.00895803	0.0184597
MEpurple	-0.0585078	0.0153125	0.0159232	0.00370016	0.0186466	0.0201382	-0.0229972	0.0174053	0.0892919	0.0810101	0.0714185	0.0706722	0.0269345	0.00605132	0.0265281	0.0219012	0.00179026	0.0296437
MEdarkgreen	-0.0501574	0.0347962	0.00417955	-0.0444475	0.0101134	0.0128157	-0.0389926	0.0168744	0.0790761	0.0619686	0.0245337	0.0048335	0.00477682	0.00809364	-0.0117016	-0.00181743	-0.00503643	-0.00539493
MEgrey60	-0.0284058	0.0150153	0.0231302	0.0319886	0.0204893	0.0106335	0.0369831	0.0593041	0.0282255	0.0518989	0.0456317	0.0116844	-0.00749825	-0.017019	-0.0242045	-0.0318402	-0.01125	-0.0159232
MEturquoise	-0.0421749	0.0145618	0.0129931	0.0305939	0.0188316	0.0150446	0.0110253	0.0372153	0.085465	0.0754273	0.048222	0.0126846	-0.00137367	-0.00112244	-0.0205622	-0.0157234	-0.00686726	-0.0194062

## Sheet: spatiotemporal regression_P val
	Tha @ Young Adult (Intercept)	Neocortex	Striatum	Ganglionic_eminence	Amygdala	Hippocampus	Brain_stem	Cerebellum	Early prenatal	Early mid-prenatal	Late mid-prenatal	Late prenatal	Early infancy	Late infancy	Early childhood	Late childhood	Adolescence	Middle adulthood
MEroyalblue	0.528969	0.0342509	0.32514	0.794485	0.156157	1.25265e-10	0.85495	0.608444	0.0312978	0.25573	0.139391	2.1563e-06	0.034889	0.765996	0.830967	0.736463	0.958426	0.695391
MEsalmon	0.652502	0.00317869	0.73911	0.636588	0.528977	0.515376	0.725111	0.163941	0.902781	0.262309	0.758036	1.86539e-91	0.00527129	0.857917	0.0076883	0.189577	0.758325	0.561598
MElightcyan	0.102998	0.139154	0.217765	1.04717e-06	0.00228145	2.51062e-05	0.887249	0.367565	2.79725e-07	0.985211	0.965151	8.22437e-20	4.42854e-05	0.142111	5.79084e-10	0.823298	0.0952399	0.166002
MEyellowgreen	0.0181973	0.257912	0.212992	0.418413	0.0417098	0.18384	0.0268522	0.08772	0.00961684	0.0464751	1.46477e-12	3.96524e-37	1.20519e-30	0.298465	2.70305e-25	0.204582	3.64052e-05	9.97324e-06
MEorangered4	0.483089	0.455136	0.684739	0.685765	0.538065	0.633072	0.721553	0.598121	0.149142	0.354332	0.856531	0.729369	0.623151	0.485197	3.41904e-10	0.278675	0.559556	0.944934
MEsteelblue	0.234091	0.873562	0.566246	0.722247	0.990573	0.34351	0.639075	0.819347	0.0147256	0.0901576	0.891143	0.296178	0.30949	0.334254	2.90775e-40	0.247628	1.83012e-06	0.0371555
MEviolet	0.824245	0.744057	0.800154	0.699873	0.559702	0.713182	0.99764	0.416539	0.00850036	0.0560136	0.481943	0.247411	0.99625	0.415861	9.69408e-27	0.526243	0.0228133	0.210862
MEbrown	9.50718e-06	0.000968699	0.632225	0.763729	0.881404	0.323817	0.930061	0.000671961	2.38994e-34	8.13684e-42	6.31851e-20	6.0994e-19	0.000130017	0.00290289	2.23109e-35	0.0726422	0.000396081	0.540363
MEtan	5.51271e-29	0.00041203	0.00189936	0.591471	0.458246	0.363483	0.723801	6.78357e-07	7.14997e-72	1.34844e-81	2.56556e-56	8.33039e-20	7.24724e-32	1.96079e-24	0.000867598	5.94312e-12	0.154366	0.00667664
MEsaddlebrown	0.768101	0.858315	0.684533	0.591991	0.789424	0.880177	0.801819	0.000125568	0.122593	0.622667	0.873016	9.43677e-08	0.901993	0.54143	0.53855	0.684958	0.484623	0.761874
MEgreenyellow	0.0420677	0.0178751	0.719154	0.759664	0.232319	0.31325	0.352203	1.63158e-92	1.77071e-08	4.27425e-09	3.41389e-06	0.227308	0.316233	0.249558	0.0922604	0.19339	0.493872	0.803127
MEskyblue3	0.830386	0.635286	0.943372	0.576591	0.995233	0.834894	0.874533	2.59005e-06	0.00731795	0.0671295	0.384103	0.911949	0.755135	2.86073e-11	0.366232	0.462688	0.974559	0.59924
MEblack	0.835064	0.592741	0.0925821	0.0343437	0.148845	0.557167	0.172145	2.37629e-15	3.64077e-08	0.284114	0.692825	0.000172761	0.164582	0.000424571	0.297249	1.84628e-08	0.29819	0.0338424
MEmediumpurple3	0.619782	0.636513	0.612914	0.935846	0.973756	0.826107	0.922862	0.00454762	0.0637596	0.0518495	0.355467	0.543461	0.577142	0.862017	0.014135	0.314245	0.761145	1.16492e-63
MEdarkgrey	0.00673672	0.115429	0.696344	0.714577	0.470314	0.634382	0.738203	0.78418	1.17429e-09	3.32482e-11	9.19965e-13	5.46708e-08	8.79997e-09	0.0343583	8.64612e-07	9.56493e-09	0.737028	1.35324e-05
MEred	0.627016	0.103247	0.999084	0.34901	0.322867	0.76977	0.253063	0.0637661	0.63445	0.00127895	0.534458	0.568485	0.00134102	0.122703	0.0405299	8.5938e-19	0.510466	1.74327e-17
MEorange	0.124957	0.397785	1.74323e-58	0.702523	0.188635	0.70502	0.543066	0.150384	9.10694e-11	2.80942e-12	1.74243e-05	0.0134324	0.656488	0.374187	0.00557114	0.854163	0.638944	0.326602
MEskyblue	0.212721	2.66858e-07	9.92283e-36	0.00448454	0.481616	0.00484961	0.692006	0.0139057	5.78179e-05	2.82878e-05	9.15993e-05	0.26034	0.148058	0.227613	0.159865	0.384083	0.95756	0.92123
MEwhite	0.518059	0.000191897	0.208826	0.305243	0.166291	0.308432	2.99212e-26	3.88489e-33	0.0165815	0.0303902	0.00013342	0.00568016	0.193156	0.937345	0.293189	0.719507	0.606775	0.622292
MEdarkturquoise	1.87573e-90	7.81302e-91	1.08212e-51	7.3378e-21	5.99887e-59	3.69882e-56	6.24953e-07	7.21399e-56	3.53265e-22	1.44692e-19	2.94747e-08	0.000609555	0.819488	0.744008	1.82135e-07	0.100653	0.0277759	0.0736538
MEdarkolivegreen	1.05559e-45	3.78063e-66	8.61188e-30	2.94343e-17	1.6857e-38	9.02961e-39	0.00509285	3.06833e-32	7.86467e-05	0.00678528	0.0268433	0.230594	0.275885	0.800999	0.154561	0.752095	0.991268	0.475922
MEplum1	3.78423e-42	1.54383e-64	1.75194e-30	1.13696e-13	8.03393e-38	3.84896e-38	0.190507	5.99229e-34	0.892053	6.67152e-05	2.32505e-10	0.000439749	0.0024891	0.392417	0.824423	0.286934	0.608717	0.742147
MEblue	1.01685e-30	0.870577	0.0991414	0.474897	0.113596	0.04652	0.535679	0.0671578	4.51599e-102	5.8894e-107	2.37792e-66	1.19345e-41	3.75682e-20	0.0952441	1.06945e-62	0.000937735	1.79434e-07	0.159073
MEdarkorange	0.809297	0.450022	0.00693912	0.0392321	0.0252402	0.00147509	0.44061	0.000385999	0.0211771	0.0001132	4.0146e-37	0.000838756	1.34384e-10	8.45235e-08	1.283e-09	0.202133	0.112804	0.267084
MEdarkred	0.39289	0.668745	0.195083	0.246732	0.280576	0.0964094	0.0643353	0.860378	0.00275404	0.000398863	4.38517e-06	0.0872136	0.411604	0.572861	1.25796e-08	7.65822e-07	0.567801	0.00134164
MEmagenta	4.46957e-14	0.726323	0.434244	0.299325	0.505212	0.128167	0.012243	0.171773	6.73942e-45	6.64323e-92	4.21419e-87	6.42506e-31	2.45691e-11	0.0372727	0.164079	0.1245	0.447143	0.373518
MEyellow	2.13857e-09	0.232858	0.0603805	2.37796e-16	0.000282548	6.43032e-05	0.214682	0.000699558	2.87672e-66	4.57104e-22	8.45125e-07	0.00299467	0.138991	0.565293	0.539771	0.769427	0.559178	0.933774
MEgreen	7.0128e-14	0.233477	0.399462	0.241194	0.674683	0.45812	0.0180602	0.164279	8.37361e-94	8.37349e-59	1.85356e-29	0.309904	0.00134624	0.000382665	0.000268215	1.50107e-07	0.0326453	0.00470702
MEpurple	1.41366e-23	0.00264204	0.0223945	0.759708	0.00542264	0.00289215	0.235498	0.0100632	4.66285e-68	1.75982e-67	2.16594e-39	4.9958e-26	1.01282e-06	0.308531	2.29347e-07	1.82336e-05	0.706371	6.87819e-05
MEdarkgreen	5.53618e-17	1.04081e-10	0.563527	0.000447289	0.145969	0.0676325	0.0534379	0.0164124	1.91695e-53	4.69819e-42	2.80221e-06	0.463081	0.399094	0.190589	0.0265565	0.730104	0.308499	0.482847
MEgrey60	2.68166e-05	0.0143964	0.00603079	0.0287827	0.0112726	0.190755	0.114035	1.16667e-12	1.29966e-07	1.46339e-24	1.46901e-13	0.126519	0.253924	0.0178732	8.33138e-05	2.70677e-07	0.0501702	0.0745362
MEturquoise	4.5739e-34	9.24186e-07	0.00130891	1.47361e-05	1.44383e-06	0.00012446	0.325261	5.57634e-20	1.0614e-131	1.12446e-126	2.15922e-50	0.000572159	0.662607	0.743839	6.6954e-12	1.19313e-07	0.0127238	6.91874e-06

## Sheet: risk gene enrichment_OR
	IQ	ASD	TS	Neuroticism	ADHD	OCD	ANO	PanicDisorder	BIP	MDD	SZes	SZgw	Epilepsy	AD	PD
royalblue	0.557935	0	0.728373	0.687371	0	0	1.31591	0	0	0.940448	0	0.119692	0.462289	0.380722	0
salmon	0.578407	0.243758	0.910285	1.08496	0	0	0.813689	0	0.530039	0.577012	0	0.606694	0.575988	2.21404	1.73768
lightcyan	0.872291	0.612942	0	1.0783	0	1.97376	1.01558	5.95093	0	1.04519	0	0.9578	0	0.902144	0
yellowgreen	1.81405	3.90699	0	1.09751	0	0	4.21578	7.73675	0	1.28499	0	2.01338	0	0.815334	2.9257
orangered4	0	0	0	0	0	0	0	0	0	0.6311	0	0	0	0	0
steelblue	0	0	0	0.333517	0	0	0	0	0	0	0	0.236025	0	0	0
violet	0	0	0	0	0	0	0	0	0	0	0	0	0	0.643426	0
brown	0.825306	0.363979	0.865468	0.918666	0.476567	2.14817	1.16405	0.490009	0.728783	0.982404	0.317593	0.862905	1.19783	1.45346	0.470562
tan	0.889558	0.205249	0.379244	0.816686	5.33817	0	0	0	0	1.14251	0	1.11522	0.240681	1.02775	0.962795
saddlebrown	0	0	1.35663	0	0	0	0	0	0	0.99483	0	0	0	1.20738	0
greenyellow	0.877058	0.500531	1.92123	0.7292	0	2.20677	0.550236	0	0.912877	0.912675	0	1.11306	1.20025	1.35006	0.772916
skyblue3	0	0	0	2.27658	0	0	0	0	2.79983	1.75378	0	1.1915	0	1.68958	2.95693
black	0.625686	0.199994	1.15602	0.528289	0	1.3308	1.02895	0.609364	1.01314	0.370698	0	0.900046	0.847945	1.31771	1.20688
mediumpurple3	0	0	0	0	0	0	0	0	0	0.723118	0	0	0	0	0
darkgrey	1.38385	0	1.79254	0.837176	0	0	0	0	0	0	0	0.591439	0.56185	1.95023	1.10982
red	0.743922	0.191495	0.913479	1.00088	0	0.61787	0.646131	1.20136	0.969848	0.905885	0	0.893817	0.339204	0.803075	0.677208
orange	0.461145	0	0	1.07954	0	0	0	3.00817	0.530144	0.831231	0	1.24049	0	1.30344	0
skyblue	0.686728	3.81042	0	0.313056	0	0	2.43584	0	0.787883	0.988613	0	1.14208	0.855815	0.95242	0
white	1.52113	1.27804	3.60493	0.826224	7.75546	0	0	0	0.683017	1.30039	0	0.386735	0.741908	0.20169	0
darkturquoise	0.446251	0	1.7781	0.830361	5.82626	3.08289	1.58632	2.91142	1.56711	1.13846	0	1.19945	1.12515	0.934695	3.40077
darkolivegreen	2.27659	3.63282	0	3.21558	14.4164	0	0	0	0	1.19472	0	0.722289	2.80068	0.375027	5.56061
plum1	0.875945	0	0	2.50387	0	0	0	0	0	1.92976	0	0	0	1.21797	0
blue	1.34215	1.37895	1.68116	1.10858	0.465488	1.08169	1.13691	1.6236	1.74507	1.40786	1.39754	1.5436	2.21051	1.11227	2.07543
darkorange	3.57045	3.70694	0	2.12237	0	3.81883	1.965	0	1.28378	4.68478	0	5.49731	3.5987	0.9632	0
darkred	1.1346	1.61515	1.47395	1.77517	4.83313	2.55737	5.57006	2.41531	3.13261	0.395171	0	1.78431	1.4113	2.01975	0.913213
magenta	1.60963	0.922908	0.23531	1.47344	1.56171	0	0.864343	0	1.60887	0.747608	1.04082	1.11591	1.41695	1.41065	1.22273
yellow	0.793384	0.4234	0.680433	1.46363	0	0.78447	0.82169	1.57055	1.33305	1.14977	0.995962	0.960237	0.725943	0.723111	0.562001
green	0.910206	0.854115	1.80708	0.799795	0	0.898227	0.694265	1.79854	1.17799	1.10158	1.78007	0.883487	1.10188	0.731406	0.98814
purple	0.372691	0	0.291072	0.553436	0	0	0.525886	0.965232	0.3423	0.590279	1.28741	0.390027	0	0.568434	0.738665
darkgreen	2.58398	5.22558	3.0498	1.60552	4.88211	8.28896	1.32926	5.03479	2.68991	1.23397	0	2.0815	2.41876	1.75133	1.87089
grey60	1.19328	0	0.571044	0.401423	0	2.00506	3.20843	0	1.36549	1.06217	0	0.772286	0	1.02291	0
turquoise	1.75647	3.93257	2.05556	1.70364	1.45884	0.228524	1.69979	0.686011	1.61797	1.61852	4.33216	1.50941	1.30714	0.910712	1.2192

## Sheet: risk gene enrichment_P val
	IQ	ASD	TS	Neuroticism	ADHD	OCD	ANO	PanicDisorder	BIP	MDD	SZes	SZgw	Epilepsy	AD	PD
royalblue	0.902378	1	0.74791	0.830714	1	1	0.536335	1	1	0.615448	1	0.999734	0.88486	0.984029	1
salmon	0.92982	0.98299	0.646979	0.445505	1	1	0.709775	1	0.889461	0.955253	1	0.948499	0.860516	0.000335234	0.256382
lightcyan	0.683773	0.836466	1	0.467395	1	0.404686	0.629713	0.0169285	1	0.490632	1	0.59724	1	0.664573	1
yellowgreen	0.237103	0.0455449	1	0.547711	1	1	0.215385	0.125302	1	0.419341	1	0.113765	1	0.704627	0.293719
orangered4	1	1	1	1	1	1	1	1	1	0.796135	1	1	1	1	1
steelblue	1	1	1	0.949504	1	1	1	1	1	1	1	0.985006	1	1	1
violet	1	1	1	1	1	1	1	1	1	1	1	1	1	0.816256	1
brown	0.895418	0.999836	0.719095	0.732877	0.876936	0.0665024	0.399964	0.9102	0.913006	0.573425	0.954407	0.882879	0.240221	0.000761749	0.977015
tan	0.680007	0.992	0.927819	0.767975	0.0626108	1	1	1	1	0.337911	1	0.365947	0.983812	0.495851	0.617565
saddlebrown	1	1	0.524727	1	1	1	1	1	1	0.573526	1	1	1	0.404473	1
greenyellow	0.705797	0.936159	0.103546	0.873044	1	0.240686	0.838015	1	0.640356	0.673943	1	0.348561	0.389822	0.0995444	0.731466
skyblue3	1	1	1	0.107671	1	1	1	1	0.165267	0.204534	1	0.466518	1	0.22247	0.291151
black	0.969932	0.99941	0.425094	0.993872	1	0.45453	0.563512	0.807871	0.532758	0.999958	1	0.731274	0.716095	0.0664202	0.407722
mediumpurple3	1	1	1	1	1	1	1	1	1	0.751248	1	1	1	1	1
darkgrey	0.27528	1	0.311491	0.702914	1	1	1	1	1	1	1	0.90311	0.83165	0.0269228	0.596759
red	0.902603	0.999599	0.640489	0.528819	1	0.803656	0.814375	0.505745	0.583098	0.717201	1	0.746087	0.992178	0.879397	0.817181
orange	0.929199	1	1	0.496283	1	1	1	0.289099	0.84852	0.716956	1	0.326487	1	0.282156	1
skyblue	0.787554	0.012211	1	0.958377	1	1	0.341274	1	0.720383	0.578334	1	0.449735	0.690881	0.606937	1
white	0.241124	0.467266	0.0549537	0.703562	0.127382	1	1	1	0.76964	0.3232	1	0.963873	0.741421	0.99262	1
darkturquoise	0.936962	1	0.314808	0.708778	0.165509	0.283516	0.471973	0.297046	0.304965	0.422616	1	0.35845	0.533483	0.62063	0.0632405
darkolivegreen	0.107353	0.0540943	1	0.0139764	0.0710913	1	1	1	1	0.464457	1	0.764229	0.16507	0.929827	0.0535375
plum1	0.683458	1	1	0.126679	1	1	1	1	1	0.213461	1	1	1	0.494606	1
blue	0.0207976	0.0650697	0.0287721	0.24999	0.882602	0.520854	0.423406	0.196423	0.00314863	0.00219818	0.348825	5.61151e-05	3.5022e-05	0.206282	0.00565247
darkorange	0.000274286	0.00718263	1	0.0420975	1	0.236353	0.403394	1	0.464984	3.56207e-08	1	4.56681e-11	0.015177	0.594643	1
darkred	0.438785	0.242688	0.397742	0.0656504	0.195683	0.330524	0.00720989	0.345711	0.00912815	0.980156	1	0.0336226	0.361947	0.0112277	0.667752
magenta	0.0195855	0.634556	0.98509	0.0455159	0.485529	1	0.675299	1	0.0946914	0.905109	0.62454	0.318864	0.19987	0.0434063	0.420669
yellow	0.897734	0.996452	0.868129	0.00888154	1	0.726219	0.716827	0.272464	0.146024	0.186946	0.606269	0.627978	0.873746	0.978594	0.920126
green	0.70824	0.740998	0.0400245	0.886592	1	0.658102	0.804028	0.2038	0.309754	0.290237	0.259065	0.795049	0.409935	0.968158	0.570908
purple	0.996867	1	0.967032	0.97361	1	1	0.850914	0.650215	0.97927	0.975859	0.548323	0.999316	1	0.98308	0.753581
darkgreen	0.00262307	8.37171e-06	0.0472264	0.120786	0.193937	0.00712067	0.532773	0.0652263	0.0286547	0.316454	1	0.00705212	0.062425	0.0442439	0.29488
grey60	0.362747	1	0.826854	0.978379	1	0.399894	0.0732529	1	0.342071	0.471146	1	0.808128	1	0.516899	1
turquoise	7.65408e-06	6.63688e-18	0.00198335	1.17682e-05	0.370196	0.985535	0.0743772	0.80924	0.00884609	9.52379e-06	0.000682341	9.07305e-05	0.122492	0.78604	0.296752
