# Supplementary material for: Spatiotemporal Brain Transcriptomics Reveal Risk Gene Hot-Spots in Major Neuropsychiatric Disorders
Source: Research Square preprint supplement (doi:10.21203/rs.3.rs-7667905/v1), 2025-10-08
Supplement: Supplementary file 4 [file Supplemental Table 12. Data supporting Fig. S6b, Enrichment of module genes in singel cell types.xlsx]

## Sheet: r_rank_biserial
	MEroyalblue	MEsalmon	MElightcyan	MEyellowgreen	MEorangered4	MEsteelblue	MEviolet	MEbrown	MEtan	MEsaddlebrown	MEgreenyellow	MEskyblue3	MEblack	MEmediumpurple3	MEdarkgrey	MEred	MEorange	MEskyblue	MEwhite	MEdarkturquoise	MEdarkolivegreen	MEplum1	MEblue	MEdarkorange	MEdarkred	MEmagenta	MEyellow	MEgreen	MEpurple	MEdarkgreen	MEgrey60	MEturquoise
Fetal.Astro	-0.481519	-0.337951	0.10935	-0.0262669	-0.558626	0.321977	-0.334402	-0.161069	-0.230017	-0.680651	-0.332973	-0.170057	-0.0103441	-0.776253	0.358678	0.498464	-0.421745	-0.357116	-0.375032	-0.435015	-0.261774	-0.565555	-0.0474349	0.0446475	-0.0347324	-0.0158701	0.378466	0.481347	0.616342	0.269306	0.387909	0.307281
Fetal.Endo	-0.448662	-0.310879	0.206581	0.143174	-0.40123	0.385891	-0.523161	-0.0124262	-0.159712	-0.736168	-0.328364	-0.131122	-0.02153	-0.858526	0.283433	0.498493	-0.459128	-0.344781	-0.404038	-0.417437	-0.195195	-0.574038	-0.0384086	0.0342153	-0.0681032	-0.0549317	0.337446	0.445505	0.627755	0.193481	0.353312	0.266195
Fetal.ExN	-0.457399	-0.263363	0.165577	-0.0322836	-0.208181	0.344707	-0.466375	-0.0915323	-0.204312	-0.630502	-0.340171	-0.153818	-0.0327054	-0.86078	0.346817	0.523085	-0.440565	-0.335724	-0.362849	-0.427914	-0.255309	-0.535296	-0.0656424	-0.00828884	-0.0718985	-0.0551986	0.404583	0.465102	0.639131	0.21772	0.400086	0.292453
Fetal.IPC	-0.460616	-0.304674	0.173584	-0.101319	-0.493768	0.333296	-0.486028	-0.138866	-0.20993	-0.584532	-0.337283	-0.12158	0.00719165	-0.835985	0.384007	0.501229	-0.462777	-0.293159	-0.415594	-0.432382	-0.238921	-0.608295	-0.0703537	-0.0746992	-0.0424782	-0.0478455	0.461327	0.46265	0.637927	0.220623	0.379407	0.32584
Fetal.IntN	-0.454069	-0.324652	0.172094	0.119541	-0.536216	0.411765	-0.373222	-0.0431117	-0.174475	-0.586823	-0.334457	-0.188108	-0.0327115	-0.75948	0.32461	0.498775	-0.48624	-0.399114	-0.366047	-0.416294	-0.193685	-0.527554	-0.0626737	-0.0100751	-0.0707274	-0.0680387	0.332953	0.458294	0.624229	0.23337	0.365807	0.277912
Fetal.Microglia	-0.430826	-0.320528	0.195676	0.228497	-0.641848	0.0365912	-0.371601	-0.0383547	-0.176719	-0.550008	-0.319418	-0.0878077	-0.0282645	-0.571665	0.302873	0.431108	-0.453964	-0.377549	-0.333908	-0.417393	-0.19301	-0.541823	-0.0798103	-0.106926	-0.0595323	-0.0643045	0.305862	0.403886	0.584142	0.21794	0.316397	0.254697
Fetal.NEP	-0.411678	-0.288908	0.222877	0.0379567	-0.700524	0.235337	-0.414452	-0.0701325	-0.177766	-0.599777	-0.335409	-0.182624	-0.0205805	-0.589731	0.335332	0.502932	-0.43266	-0.334012	-0.350073	-0.410965	-0.241143	-0.621147	-0.101761	-0.100434	-0.0476748	-0.0510344	0.433789	0.439772	0.627748	0.168969	0.352014	0.293687
Fetal.OPC	-0.466288	-0.365391	0.131418	0.0410485	-0.391252	0.31079	-0.520715	-0.133322	-0.208091	-0.649631	-0.331356	-0.184424	-0.0287585	-0.621718	0.275177	0.506999	-0.469389	-0.366307	-0.371459	-0.429387	-0.231553	-0.45621	-0.0169041	0.10503	-0.0163809	-0.033163	0.323351	0.467172	0.612849	0.286326	0.39587	0.283277
Fetal.Oligo	-0.436479	-0.281455	0.184926	-0.193306	-0.103245	0.425136	-0.398189	-0.0952685	-0.226112	-0.54051	-0.341807	-0.193467	-0.0355112	-0.605807	0.338913	0.473141	-0.481477	-0.373631	-0.374326	-0.474498	-0.31968	-0.481446	-0.114574	-0.197333	-0.064773	-0.0307848	0.425106	0.431889	0.62946	0.190399	0.33945	0.300162
Fetal.Per	-0.439499	-0.266692	0.22533	0.176074	-0.777282	0.29945	-0.399692	0.00628485	-0.133518	-0.502258	-0.321503	-0.160422	-0.0368277	-0.839897	0.292431	0.478707	-0.437353	-0.287565	-0.347707	-0.400673	-0.188933	-0.532216	-0.0562225	-0.0822562	-0.0647024	-0.0875361	0.366148	0.422027	0.608412	0.159009	0.343804	0.261283
Fetal.Trans	-0.415906	-0.260462	0.218	0.0550922	-0.491928	0.292367	-0.52616	-0.0690242	-0.147726	-0.720657	-0.330058	-0.0737777	-0.0215462	-0.734288	0.39278	0.524026	-0.474332	-0.311495	-0.323057	-0.424596	-0.162712	-0.540901	-0.0916614	-0.0786504	-0.0794477	-0.0625007	0.440344	0.440927	0.647197	0.0984374	0.352482	0.281323
Fetal.quiescent	-0.443931	-0.447356	-0.0386351	0.0551999	-0.174899	0.408336	-0.380798	-0.231438	-0.255134	-0.793391	-0.267572	-0.188655	-0.0741548	-0.885574	0.318317	0.479901	-0.39931	-0.277285	-0.357533	-0.368143	-0.231638	-0.582801	0.0286745	0.216093	-0.0447656	0.0363741	0.160733	0.547231	0.566579	0.438969	0.358787	0.338031
Fetal.replicating	-0.388533	-0.315414	0.22242	0.0947158	-0.514553	0.193055	-0.275331	-0.117053	-0.226632	-0.603968	-0.300502	-0.149675	-0.0694767	-0.560727	0.355969	0.427552	-0.411336	-0.339354	-0.358654	-0.458464	-0.295649	-0.494533	-0.134826	-0.169135	-0.0797607	-0.0513221	0.440492	0.43143	0.518734	0.122279	0.253751	0.27761
Astro	-0.32427	-0.371824	0.293083	0.238142	-0.240038	0.361762	-0.37135	0.142728	0.012458	-0.76085	-0.291519	-0.173934	-0.0570624	-0.602261	0.268551	0.465751	-0.387021	-0.359005	-0.34667	-0.367287	-0.25895	-0.641565	0.0358995	-0.157297	-0.11302	-0.141753	0.109082	0.40602	0.357983	-0.0154775	0.267768	0.178845
Endo	-0.442845	0.0116911	0.193734	0.104012	0.116224	0.43102	0.0885027	0.157621	0.175916	-0.625195	-0.236082	-0.144499	-0.166292	-0.74158	0.206465	0.460033	-0.345304	-0.2	-0.367201	-0.300846	-0.118129	-0.440178	0.037257	-0.114402	-0.136227	-0.140362	0.125504	0.336144	0.470829	0.0744019	0.101605	0.131422
Microglia	-0.452449	-0.0389551	0.15146	0.130859	-0.247796	0.322451	-0.310555	0.0528508	0.137323	-0.562521	-0.206589	-0.0603718	-0.0870552	-0.798462	0.136065	0.37453	-0.33625	-0.235178	-0.310457	-0.256043	-0.194019	-0.498115	0.0161702	-0.0366348	-0.100242	-0.128951	0.147173	0.349225	0.463313	-0.00885332	0.164458	0.175159
Neurons	-0.443311	-0.382385	-0.0939326	0.0897164	-0.471259	0.359537	-0.32749	-0.143132	-0.146724	-0.654172	-0.220905	-0.125163	-0.0825434	-0.81729	0.345446	0.549293	-0.248188	-0.262184	-0.369133	-0.221818	-0.149439	-0.478072	0.257512	0.167692	-0.0950863	-0.125624	0.0528149	0.463884	0.466111	0.150638	0.248233	0.15076
OPC	-0.354824	-0.151974	0.134064	0.157731	-0.220265	0.285743	-0.25542	-0.013437	0.0869847	-0.511171	-0.216203	-0.10205	-0.187621	-0.47315	-0.0894316	0.399777	-0.375181	-0.271839	-0.262651	-0.272059	-0.149434	-0.378435	-0.0153133	-0.0270852	-0.248514	-0.258246	0.131557	0.403567	0.234524	0.113696	0.205402	0.153624
Oligo	-0.460575	-0.371505	0.107736	0.00661058	-0.574173	0.279762	-0.323142	-0.0628727	0.515177	-0.706902	-0.259138	-0.118449	-0.107948	-0.879674	0.302528	0.489232	-0.392815	-0.280468	-0.382637	-0.317653	-0.237343	-0.580668	0.0731212	-0.0833531	-0.064633	-0.140235	0.132501	0.458029	0.453905	0.0679453	0.18962	0.169746
Ex1	-0.25034	-0.449299	-0.096204	0.145877	-0.658241	0.121965	-0.465763	-0.233219	-0.125643	-0.651132	-0.153516	-0.255905	0.00931132	-0.58804	-0.137252	0.129722	-0.183715	-0.292439	-0.297693	-0.20484	-0.142158	-0.576357	0.417501	0.308601	0.268321	-0.0571309	-0.0628964	0.287735	0.0207821	0.342889	0.239635	0.272325
Ex2	-0.242226	-0.43843	-0.0749589	0.124012	-0.612461	0.058898	-0.562284	-0.227353	-0.105816	-0.686501	-0.140737	-0.247526	0.00202526	-0.690268	-0.14639	0.120498	-0.251625	-0.255224	-0.272492	-0.131016	-0.0857207	-0.523985	0.391532	0.3392	0.245174	-0.0670493	-0.0614904	0.278043	-0.00630462	0.35336	0.260433	0.256721
Ex3	-0.301163	-0.448062	-0.0918325	0.138701	-0.613356	0.137551	-0.50115	-0.220436	-0.11308	-0.732272	-0.143333	-0.213664	-0.0376474	-0.68934	-0.0831823	0.166086	-0.243972	-0.295415	-0.260847	-0.133933	-0.0659468	-0.541032	0.419504	0.289225	0.244323	-0.0708648	-0.0632363	0.287394	0.0234533	0.359654	0.197829	0.250791
Ex4	-0.281477	-0.437436	-0.0770304	0.127207	-0.612295	0.162833	-0.507074	-0.226619	-0.11932	-0.685066	-0.14713	-0.199997	-0.0115567	-0.418589	-0.10381	0.146964	-0.268056	-0.338316	-0.295745	-0.170005	-0.0592918	-0.519073	0.41087	0.272423	0.265757	-0.0662068	-0.071508	0.285295	0.038462	0.347606	0.230366	0.267143
Ex5	-0.28737	-0.442972	-0.0809676	0.155677	-0.616903	0.10194	-0.511599	-0.232643	-0.112201	-0.721254	-0.146594	-0.264371	-0.00245272	-0.683307	-0.142639	0.13385	-0.245784	-0.308036	-0.282322	-0.16555	-0.0399194	-0.519117	0.408333	0.28884	0.254424	-0.0650811	-0.0713516	0.288917	0.051997	0.38616	0.239983	0.270195
Ex6	-0.253019	-0.422306	-0.0472247	0.205884	-0.615942	0.107727	-0.357673	-0.224834	-0.0897301	-0.65791	-0.117016	-0.271706	0.0370971	-0.559997	-0.210816	0.079671	-0.212519	-0.267536	-0.22461	-0.147379	-0.00952369	-0.534503	0.358743	0.296932	0.276547	-0.0558779	-0.0712421	0.264163	-0.0551626	0.453726	0.279547	0.28365
Ex7	-0.243088	-0.435237	-0.0637245	0.15535	-0.606411	0.128263	-0.398336	-0.229049	-0.116974	-0.650161	-0.149551	-0.256314	0.0208358	-0.575013	-0.163137	0.0856894	-0.244986	-0.265191	-0.3248	-0.201313	-0.0455742	-0.540225	0.399929	0.289761	0.279851	-0.0421524	-0.070135	0.2676	-0.010396	0.377029	0.250303	0.273424
Ex8	-0.222312	-0.398043	-0.0664874	0.125403	-0.535089	0.105451	-0.473648	-0.220893	-0.108623	-0.650342	-0.125528	-0.344462	0.0325617	-0.817356	-0.149966	0.10529	-0.256095	-0.280027	-0.280688	-0.141906	-0.119914	-0.560772	0.361047	0.288953	0.26335	-0.0504802	-0.0586785	0.258976	0.0357606	0.319178	0.255405	0.265289
In1	-0.338786	-0.437632	-0.0315884	0.264482	-0.611433	0.140991	-0.606085	-0.198365	-0.106577	-0.610336	-0.104305	-0.248225	-0.0218488	-0.640082	-0.115121	0.126436	-0.176837	-0.12742	-0.184092	-0.0729647	-0.0123021	-0.497096	0.322589	0.328069	0.227532	-0.0400138	-0.0307611	0.285318	0.0452615	0.394456	0.255635	0.277815
In2	-0.301272	-0.441973	-0.040706	0.236962	-0.629881	0.105063	-0.498548	-0.202445	-0.109758	-0.652851	-0.117412	-0.241206	-0.0155013	-0.631398	-0.105179	0.162012	-0.220318	-0.216051	-0.247941	-0.0877375	-0.00418018	-0.487866	0.325695	0.294393	0.21445	-0.0342378	-0.0338575	0.282491	0.0707152	0.287084	0.230721	0.264597
In3	-0.29149	-0.436671	-0.0107312	0.233102	-0.625191	0.134581	-0.501739	-0.198065	-0.103651	-0.583826	-0.0901176	-0.24648	-0.0133993	-0.656391	-0.0970239	0.142395	-0.226394	-0.232826	-0.275793	-0.129713	-0.0996066	-0.501255	0.312369	0.248104	0.215543	-0.0324315	-0.0307548	0.284511	0.0892944	0.309777	0.249524	0.265038
In4	-0.347131	-0.435648	-0.0525208	0.271359	-0.589903	0.179501	-0.487178	-0.20727	-0.116276	-0.682298	-0.131731	-0.257597	-0.0148061	-0.707969	-0.0695712	0.170954	-0.209286	-0.220021	-0.225044	-0.146126	-0.085599	-0.599049	0.319311	0.272576	0.246313	-0.0291408	-0.0288089	0.300945	0.0667112	0.31506	0.243729	0.276868
In5	-0.325862	-0.414406	-0.033971	0.256134	-0.694076	0.139735	-0.588893	-0.194376	-0.122422	-0.563823	-0.125029	-0.201453	0.00708069	-0.494232	-0.104778	0.127521	-0.182327	-0.256744	-0.200642	-0.143298	-0.083881	-0.540289	0.316725	0.279206	0.230207	-0.0365406	-0.0372804	0.286245	0.0248938	0.326974	0.23515	0.276678
In6	-0.311615	-0.448719	-0.0651892	0.178319	-0.65307	0.157219	-0.475159	-0.206588	-0.124716	-0.611928	-0.136541	-0.246735	-0.0241483	-0.733824	-0.0742667	0.201454	-0.254183	-0.231018	-0.26478	-0.131574	-0.103678	-0.549442	0.358398	0.303532	0.233598	-0.0520689	-0.0448629	0.299704	0.0412144	0.307754	0.226725	0.25696
In7	-0.265449	-0.403894	-0.065373	0.228245	-0.373981	0.186554	-0.573882	-0.213086	-0.102788	-0.655957	-0.14157	-0.319865	0.0231147	-0.25232	-0.103098	0.13168	-0.218365	-0.234987	-0.256293	-0.161197	-0.0731538	-0.434769	0.334382	0.231492	0.235402	-0.0478968	-0.0405111	0.258686	-0.0311073	0.299039	0.249971	0.265469
In8	-0.296914	-0.430789	-0.00670344	0.198585	-0.547554	0.108227	-0.578547	-0.19258	-0.0376703	-0.61779	-0.119619	-0.336261	-0.00667355	-0.709626	-0.143588	0.122539	-0.212189	-0.206767	-0.231347	-0.131761	-0.0299289	-0.496257	0.337249	0.334198	0.23341	-0.0456493	-0.0479305	0.274752	0.0121943	0.381261	0.245099	0.263867

## Sheet: P_value
	MEroyalblue	MEsalmon	MElightcyan	MEyellowgreen	MEorangered4	MEsteelblue	MEviolet	MEbrown	MEtan	MEsaddlebrown	MEgreenyellow	MEskyblue3	MEblack	MEmediumpurple3	MEdarkgrey	MEred	MEorange	MEskyblue	MEwhite	MEdarkturquoise	MEdarkolivegreen	MEplum1	MEblue	MEdarkorange	MEdarkred	MEmagenta	MEyellow	MEgreen	MEpurple	MEdarkgreen	MEgrey60	MEturquoise
Fetal.Astro	1	1	0.00162156	0.632011	0.973635	0.022104	0.95899	1	1	0.999954	1	0.929651	0.634704	0.971514	3.75603e-14	1.3375e-98	1	1	1	1	0.999514	1	0.999329	0.178424	0.815567	0.738774	1.15061e-97	6.2252e-135	5.0027e-58	1.10404e-10	5.65382e-19	2.38663e-98
Fetal.Endo	1	1	1.32625e-08	0.0330023	0.918006	0.00792603	0.996751	0.787796	0.999999	0.999988	1	0.872079	0.763289	0.982395	1.69437e-09	1.13068e-98	1	1	1	1	0.993064	1	0.995305	0.239994	0.961009	0.986601	3.83779e-78	5.50114e-116	3.7387e-60	2.54832e-06	4.59806e-16	2.11133e-74
Fetal.ExN	1	1	4.21117e-06	0.660607	0.764674	0.0156743	0.992318	1	1	0.999854	1	0.908498	0.861685	0.98254	2.48507e-13	3.34438e-108	1	1	1	1	0.999348	1	0.999995	0.567867	0.968474	0.986889	3.92272e-111	5.93291e-126	3.75746e-62	1.47324e-07	4.87316e-20	3.59768e-89
Fetal.IPC	1	1	1.5139e-06	0.903107	0.956437	0.0187137	0.994222	1	1	0.999607	1	0.853681	0.405481	0.979732	6.22775e-16	1.66181e-99	1	0.999997	1	1	0.998686	1	0.999999	0.938253	0.86391	0.972981	9.10045e-144	1.28103e-124	6.56566e-62	1.02654e-07	3.32893e-18	4.00944e-110
Fetal.IntN	1	1	1.79515e-06	0.0624203	0.968544	0.00502969	0.973894	0.997206	1	0.99963	1	0.948441	0.861953	0.968754	6.45253e-12	9.21456e-99	1	1	1	1	0.992682	1	0.999989	0.582376	0.966393	0.996952	4.06608e-76	1.39204e-122	1.71715e-59	1.89383e-08	4.37952e-17	6.96607e-81
Fetal.Microglia	1	1	6.48999e-08	0.00164404	0.987145	0.409381	0.973612	0.993248	1	0.999235	1	0.777073	0.827141	0.919977	1.2352e-10	1.26786e-74	1	1	1	1	0.992607	1	1	0.986498	0.938655	0.9953	8.10196e-65	4.46785e-96	1.48042e-52	1.32417e-07	2.78106e-13	1.52485e-68
Fetal.NEP	1	1	9.92379e-10	0.31308	0.992426	0.0707176	0.984422	0.999997	1	0.999717	1	0.943158	0.753326	0.925905	1.366e-12	2.61793e-100	1	1	1	1	0.998811	1	1	0.980886	0.891263	0.980128	1.46042e-127	5.61528e-113	4.23473e-60	3.42898e-05	6.02326e-16	5.23197e-90
Fetal.OPC	1	1	0.000201169	0.299094	0.912615	0.0260307	0.996621	1	1	0.999906	1	0.944979	0.830849	0.936361	4.7677e-09	5.68361e-102	1	1	1	1	0.998242	0.999997	0.873501	0.0150797	0.664182	0.90935	6.48387e-72	2.73388e-127	2.02833e-57	7.461e-12	1.08461e-19	5.95129e-84
Fetal.Oligo	1	1	3.08092e-07	0.993527	0.640064	0.00389579	0.980963	1	1	0.999072	1	0.953388	0.881785	0.931613	7.33367e-13	2.49246e-89	1	1	1	1	0.999973	0.999999	1	0.999977	0.953369	0.892988	5.22473e-123	2.07944e-109	1.29038e-60	3.49896e-06	5.31448e-15	3.0985e-94
Fetal.Per	1	1	6.25492e-10	0.011819	0.99652	0.0304861	0.981294	0.342965	0.999976	0.998081	1	0.917961	0.890177	0.980405	5.14012e-10	2.45607e-91	1	0.999996	1	1	0.991434	1	0.999929	0.955405	0.953139	0.999794	8.8636e-92	1.65746e-104	9.80573e-57	8.78122e-05	2.47385e-15	6.8267e-72
Fetal.Trans	1	1	2.25966e-09	0.239906	0.955856	0.0339531	0.996873	0.999995	0.999996	0.999983	1	0.738472	0.76321	0.964007	1.38247e-16	1.43917e-108	1	0.999999	1	1	0.97976	1	1	0.947582	0.980005	0.994079	3.29767e-131	2.05209e-113	1.14655e-63	0.0102298	5.76427e-16	1.15083e-82
Fetal.quiescent	1	1	0.850763	0.23938	0.727848	0.00537201	0.97613	1	1	0.999997	1	0.948844	0.993199	0.985028	1.62522e-11	1.70534e-91	1	0.999991	1	1	0.998239	1	0.0263153	4.13638e-06	0.876522	0.0714116	3.04988e-19	1.34467e-173	2.50523e-49	2.30834e-25	1.72764e-16	1.83261e-118
Fetal.replicating	1	1	9.97114e-10	0.111621	0.963071	0.113409	0.924278	1	1	0.999748	1	0.903019	0.989745	0.91582	5.21353e-14	2.23111e-73	1	1	1	1	0.999905	1	1	0.999765	0.980645	0.980866	5.79426e-132	3.15783e-109	7.50212e-42	0.0019471	3.71704e-09	5.83872e-81
Astro	1	1	1.55603e-15	0.00112352	0.797305	0.0119186	0.97322	2.41083e-20	0.352488	0.999994	1	0.933982	0.971195	0.930058	1.09106e-08	2.72881e-86	1	1	1	1	0.999446	1	0.00763322	0.999412	0.998265	1	8.05874e-10	1.42035e-96	7.16889e-21	0.642284	5.76903e-10	1.13063e-34
Endo	1	0.363731	7.42035e-08	0.0892909	0.342379	0.00332584	0.321441	9.37584e-25	3.54322e-08	0.999853	1	0.89638	1	0.966536	7.21576e-06	1.49447e-85	1	0.999086	1	1	0.93317	0.999995	0.00557737	0.991313	0.999808	1	1.31402e-12	6.47113e-68	3.27794e-35	0.0386627	0.00995807	6.78597e-20
Microglia	1	0.877007	2.02984e-05	0.0454436	0.806463	0.0212656	0.947988	0.000314732	1.31879e-05	0.999433	1	0.700709	0.998232	0.975627	0.00214773	2.51503e-57	1	0.999875	1	1	0.993072	1	0.135579	0.776672	0.995479	1	1.23867e-16	5.3393e-73	4.25232e-34	0.583167	8.3468e-05	8.82801e-34
Neurons	1	1	0.994228	0.125015	0.94869	0.0124084	0.955544	1	0.999996	0.999914	1	0.860603	0.99697	0.977348	3.1376e-13	5.57477e-119	0.999999	0.999974	1	0.999999	0.970014	0.999999	4.944e-68	0.00027345	0.992999	1	0.00175676	3.37671e-125	5.44024e-34	0.000195831	8.57827e-09	3.57559e-25
OPC	1	0.999997	0.000144712	0.0210064	0.778498	0.0364565	0.90891	0.80709	0.0039514	0.998418	1	0.812697	1	0.87805	0.969448	9.72096e-65	1	0.999988	0.999995	1	0.970704	0.999922	0.850776	0.712732	1	1	1.3317e-13	2.50979e-96	4.67216e-10	0.00356457	1.35839e-06	2.48921e-26
Oligo	1	1	0.00186812	0.466202	0.976737	0.04024	0.953536	0.999973	1.40651e-55	0.999976	1	0.847531	0.999836	0.984483	1.42761e-10	5.05639e-95	1	0.999993	1	1	0.998606	1	3.85757e-07	0.957266	0.952719	1	1.15393e-13	2.43764e-122	2.15137e-32	0.0547162	8.12042e-06	1.9116e-31
Ex1	1	1	0.995157	0.0307194	0.988693	0.223242	0.992227	1	0.999932	0.999908	1	0.986596	0.378437	0.925114	0.997871	2.25233e-08	0.999741	0.999997	1	0.999997	0.96322	1	3.5099e-175	1.00061e-10	2.04694e-12	0.989268	0.999746	1.67742e-49	0.294815	3.49463e-16	2.61721e-08	1.52322e-77
Ex2	1	1	0.978078	0.0559193	0.983053	0.35658	0.998254	1	0.999345	0.99996	0.999997	0.983896	0.473158	0.954555	0.998851	1.8783e-07	0.999999	0.99996	0.999997	0.998021	0.859701	1	2.38554e-154	1.35491e-12	1.18119e-10	0.996522	0.999661	2.32306e-46	0.564992	4.50466e-17	1.65361e-09	3.74702e-69
Ex3	1	1	0.993231	0.0376753	0.983183	0.195287	0.995382	1	0.999703	0.999987	0.999998	0.967757	0.894671	0.954337	0.958398	1.2514e-12	0.999998	0.999997	0.999994	0.998388	0.796754	1	7.65091e-177	1.24691e-09	1.36191e-10	0.997831	0.999763	2.17273e-49	0.27136	1.27719e-17	3.50202e-06	4.29678e-66
Ex4	1	1	0.980833	0.0514496	0.983029	0.154722	0.995781	1	0.999855	0.999958	0.999999	0.958235	0.649607	0.847391	0.984691	2.87995e-10	1	1	1	0.999908	0.772262	1	9.80493e-170	9.79967e-09	3.26358e-12	0.996151	0.999961	1.06075e-48	0.159081	1.39886e-16	8.35638e-08	1.05649e-74
Ex5	1	1	0.985265	0.0229682	0.98369	0.262295	0.996064	1	0.999672	0.999983	0.999999	0.988919	0.532501	0.952902	0.998514	8.31202e-09	0.999998	0.999999	0.999999	0.999864	0.692335	1	1.12757e-167	1.30904e-09	2.43627e-11	0.9956	0.99996	6.83013e-50	0.0885828	4.98881e-20	2.50324e-08	2.27574e-76
Ex6	1	1	0.897927	0.00414904	0.983554	0.250661	0.968412	1	0.996786	0.999921	0.999911	0.990639	0.108704	0.914914	0.999994	0.000390577	0.99997	0.999982	0.999915	0.999405	0.547715	1	5.97802e-130	4.65795e-10	4.45214e-13	0.987752	0.999959	4.77555e-42	0.923886	6.34505e-27	1.0783e-10	6.10209e-84
Ex7	1	1	0.956689	0.023197	0.982152	0.211682	0.980735	1	0.999809	0.999906	0.999999	0.986718	0.244226	0.920498	0.99966	0.000151243	0.999998	0.999979	1	0.999995	0.716899	1	6.13235e-161	1.16539e-09	2.3824e-13	0.95513	0.999947	4.28075e-43	0.606354	3.51909e-19	6.5221e-09	3.74658e-78
Ex8	0.999998	1	0.963095	0.0539373	0.968084	0.255204	0.99306	1	0.999515	0.999906	0.999971	0.998561	0.139482	0.977357	0.999106	4.50565e-06	0.999999	0.999992	0.999999	0.999099	0.934397	1	1.35188e-131	1.29045e-09	5.03745e-12	0.978923	0.999408	1.71696e-40	0.17667	2.89766e-14	3.28859e-09	1.06464e-73
In1	1	1	0.802167	0.000348174	0.982903	0.189417	0.999179	1	0.999395	0.999771	0.999582	0.984138	0.766223	0.941536	0.991747	4.87656e-08	0.999584	0.975505	0.998971	0.945721	0.561535	1	1.63928e-105	6.77947e-12	2.05358e-09	0.946376	0.955436	1.04212e-48	0.120054	8.12589e-21	3.18772e-09	1.29939e-80
In2	1	1	0.863143	0.0011901	0.985433	0.255982	0.995197	1	0.999571	0.999911	0.999915	0.981562	0.696868	0.939012	0.985756	4.20544e-12	0.999984	0.999578	0.999983	0.973172	0.520987	0.999999	1.64657e-107	6.46021e-10	1.49715e-08	0.915927	0.969337	8.65659e-48	0.0332269	7.03367e-12	7.99918e-08	2.51172e-73
In3	1	1	0.61354	0.00140093	0.984822	0.200444	0.995424	1	0.999178	0.9996	0.998049	0.983528	0.672029	0.946054	0.978342	9.61442e-10	0.999991	0.999839	0.999998	0.997833	0.895035	1	4.50949e-99	1.5752e-07	1.27353e-08	0.904134	0.955404	1.91225e-48	0.0102367	1.53445e-13	7.23229e-09	1.45438e-73
In4	1	1	0.92106	0.000251474	0.979484	0.131265	0.994307	1	0.999793	0.999955	0.999988	0.987091	0.688746	0.958547	0.92632	2.83018e-13	0.999962	0.999662	0.999917	0.999345	0.859359	1	2.00816e-103	9.6219e-09	9.75389e-11	0.879605	0.944322	5.90718e-54	0.0416878	6.04919e-14	1.54583e-08	4.44087e-80
In5	1	1	0.819497	0.000511779	0.991892	0.191547	0.99889	1	0.9999	0.999397	0.999969	0.959346	0.40694	0.886971	0.98545	3.78668e-08	0.999715	0.999964	0.999609	0.999188	0.854475	1	8.60034e-102	4.32365e-09	1.34934e-09	0.929338	0.980316	5.18445e-49	0.25911	7.01309e-15	4.61406e-08	5.68453e-80
In6	1	1	0.960188	0.0111191	0.988151	0.163211	0.993211	1	0.999924	0.999779	0.999994	0.983618	0.78899	0.963864	0.939033	9.94084e-18	0.999999	0.999821	0.999995	0.998096	0.904053	1	1.05173e-129	1.9651e-10	7.87052e-10	0.981956	0.993419	1.57848e-53	0.142382	2.18277e-13	1.30298e-07	2.8092e-69
In7	1	1	0.960611	0.00171456	0.9024	0.12212	0.998564	1	0.999101	0.999917	0.999997	0.997178	0.221083	0.731738	0.98411	1.40877e-08	0.999982	0.999859	0.999991	0.999804	0.821422	0.999992	3.3618e-113	9.12935e-07	5.89013e-10	0.973073	0.987417	2.09222e-40	0.790274	9.70955e-13	6.8161e-09	8.51334e-74
In8	1	1	0.571524	0.00544649	0.971055	0.249669	0.998673	1	0.873699	0.999806	0.999936	0.998191	0.587803	0.958906	0.998607	1.18961e-07	0.99997	0.9993	0.999946	0.998121	0.646813	1	4.13763e-115	2.81156e-12	8.11111e-10	0.966934	0.995962	2.56162e-45	0.375817	1.43107e-19	1.29376e-08	6.19273e-73
