# Supplementary material for: Spatiotemporal Brain Transcriptomics Reveal Risk Gene Hot-Spots in Major Neuropsychiatric Disorders
Source: Research Square preprint supplement (doi:10.21203/rs.3.rs-7667905/v1), 2025-10-08
Supplement: Supplementary file 5 [file Supplemental Table 13. GO terms enriched in the 16 top co-expression modules.xlsx]

## Sheet: GO_export_ME_blue
	ME_salmon		ME_lightcyan		ME_yellowgreen		ME_brown		ME_tan		ME_white		ME_darkturquoise		ME_darkolivegreen		ME_blue		ME_darkorange		ME_darkred		ME_yellow		ME_green		ME_darkgreen		ME_grey60		ME_turquoise
	ID	-log10P	ID	-log10P	ID	-log10P	ID	-log10P	ID	-log10P	ID	-log10P	ID	-log10P	ID	-log10P	ID	-log10P	ID	-log10P	ID	-log10P	ID	-log10P	ID	-log10P	GO:0045499	5.69288	ID	-log10P	ID	-log10P
1	GO:0019838	13.4281	GO:0003779	3.32301	GO:0098982	3.89555	GO:0042605	7.79235	GO:0042578	3.14595	GO:0045499	3.56073	GO:0098632	5.6004	GO:0015085	3.76246	GO:0005267	29.8377	GO:0043197	3.33098	GO:0030695	3.44356	GO:0042393	18.8512	GO:0051082	3.79567	GO:0099572	3.19326	GO:0001227	5.34146	GO:0032452	15.3152
2	GO:0048407	13.655	GO:0106310	3.82201	GO:0009898	3.89555	GO:0046977	7.79235	GO:0008238	3.24681	GO:0030215	3.93431	GO:0098960	5.6004	GO:0005262	4.05455	GO:0046873	29.8803	GO:0099572	3.40394	GO:0060589	3.44356	GO:0003684	22.9745	GO:0044389	4.73685	GO:0032279	3.22045	GO:0001217	5.34146	GO:0140457	15.3152
3	GO:0048018	13.655	GO:0045296	4.16037	GO:0045211	3.89555	GO:0042277	7.79235	GO:0008081	3.88866	GO:0005496	3.93431	GO:0050997	5.6004	GO:0008188	4.29898	GO:0005261	30.1373	GO:0098839	3.66923	GO:0001018	3.44356	GO:0016887	24.692	GO:0090079	4.8995	GO:0097060	3.26732	GO:0016607	6.04315	GO:0140030	16.511
4	GO:0050840	14.7798	GO:0004674	4.16037	GO:0005796	3.89555	GO:0050431	8.43007	GO:0008381	3.88866	GO:0001227	6.22563	GO:0005261	6.40455	GO:0008528	5.52439	GO:0022843	30.1373	GO:0030863	3.66923	GO:0048156	3.8233	GO:0004386	26.5822	GO:0140098	4.8995	GO:0014069	3.26732	GO:0007549	3.25185	GO:0140658	18.2462
5	GO:0005539	15.0894	GO:0031234	3.57862	GO:0097060	3.89555	GO:0019838	9.54973	GO:0016805	3.88866	GO:0001217	6.22563	GO:0022848	6.42667	GO:0001653	5.52439	GO:0005216	31.0234	GO:0045211	3.66923	GO:0004674	4.50245	GO:0000217	27.5413	GO:0031625	5.57823	GO:0098978	4.45905	GO:0009048	3.28169	GO:0004386	18.4131
6	GO:0005518	15.0894	GO:0015629	3.57862	GO:0098562	3.89555	GO:0016616	9.54973	GO:0008235	3.88866	GO:0001228	13.6484	GO:0015267	6.42667	GO:0042923	8.36433	GO:0005244	31.2577	GO:0097060	3.67655	GO:0050321	5.88978	GO:0017116	31.7011	GO:0008135	6.60467	GO:0050770	6.90678	GO:0051028	3.28169	GO:0140097	19.3169
7	GO:0005344	19.071	GO:0005912	3.57862	GO:0010810	3.4471	GO:0019955	9.54973	GO:0008237	3.88866	GO:0001216	13.6484	GO:0022803	6.42667	GO:0004985	8.73817	GO:0022832	31.2577	GO:0032279	3.9861	GO:0106310	5.88978	GO:0003678	32.4955	GO:0140223	7.09684	GO:0007411	7.0344	GO:1903311	4.38454	GO:0070577	20.1334
8	GO:0031720	22.9185	GO:0001726	4.80605	GO:0046578	4.08601	GO:0030881	9.54973	GO:0005319	4.09431	GO:0072078	15.6118	GO:0030594	6.42667	GO:0007631	5.68495	GO:0015079	35.4335	GO:0099634	3.9861	GO:0098830	3.23813	GO:0008094	38.8684	GO:0043021	7.91387	GO:0097485	7.0344	GO:0006397	6.37448	GO:0140033	20.1334
9	GO:0030020	23.2009	GO:0031252	6.8424	GO:0007264	4.08601	GO:0016614	9.54973	GO:0019911	7.63182	GO:0060993	16.1513	GO:0005216	6.69405	GO:0042755	6.75738	GO:0022836	35.8508	GO:0098984	4.13544	GO:0030117	3.23813	GO:0003697	40.9021	GO:0016251	8.09039	GO:0007409	7.43622	GO:0008380	6.37448	GO:0003713	22.0308
10	GO:0005201	59.264	GO:0030027	6.8424	GO:0040037	4.08601	GO:0033218	9.54973	GO:0009925	3.91787	GO:0001656	16.5633	GO:0015464	7.9671	GO:0031016	6.9102	GO:0022839	35.8508	GO:0043198	4.13544	GO:0048475	3.23813	GO:0140097	48.3757	GO:0003743	8.33278	GO:0021537	8.04182			GO:0042393	35.3595
11	GO:0060205	20.4635	GO:0005925	12.0978	GO:0051058	4.09286	GO:0042611	13.7627	GO:0005938	3.91787	GO:0072009	17.0088	GO:0097060	4.31317	GO:0048663	6.96626	GO:0098984	49.1693	GO:0034329	5.13126	GO:0098978	3.26522	GO:0000781	36.3796	GO:0055029	8.59202	GO:0016358	8.04182			GO:0005681	12.8056
12	GO:0034774	20.5702	GO:0030055	12.5257	GO:0046580	4.39915	GO:0045335	15.3919	GO:0015629	4.39974	GO:0072073	17.1114	GO:0150034	4.31317	GO:0045165	6.96626	GO:0099572	50.2505	GO:0007416	5.50581	GO:0030119	4.00568	GO:0072686	37.2442	GO:0005635	8.7325	GO:0050919	8.22933			GO:0031248	12.8328
13	GO:0031093	21.5864	GO:2000736	3.80938	GO:0051056	6.92427	GO:0005925	15.3919	GO:0005770	4.75807	GO:0061326	18.3014	GO:1990351	4.49982	GO:0048665	6.96626	GO:0030133	53.3327	GO:0050807	5.88504			GO:0005657	41.5489	GO:0036464	8.85346	GO:0030900	9.21228			GO:0035770	13.455
14	GO:0005833	22.3911	GO:0045665	4.30487	GO:0098742	35.196	GO:0005765	15.3919	GO:0044304	5.01818	GO:0072080	18.5309	GO:0043025	4.49982	GO:0030900	6.96626	GO:0098978	56.45	GO:0050803	7.31034			GO:0005819	48.8224	GO:0030880	8.85346	GO:0010975	10.0606			GO:0000123	13.5523
15	GO:0031838	23.3198	GO:0001701	4.42317	GO:0007156	40.446	GO:0098852	15.3919	GO:0045178	5.01818	GO:0001822	20.8147	GO:0005927	4.49982	GO:0038003	6.96626	GO:0043025	57.5625	GO:0051963	7.31034			GO:0000776	61.4133	GO:0030684	9.28737	GO:0050808	10.4968			GO:1904949	13.824
16	GO:0072562	25.4742	GO:0071364	4.42317			GO:0030055	15.3919	GO:0016324	5.92925	GO:0007389	20.8147	GO:0099160	4.49982	GO:0007218	7.04728	GO:0030672	59.9436	GO:0050804	8.00547			GO:0000779	66.1733	GO:0005759	9.28737					GO:0036464	14.4368
17	GO:0005581	27.9449	GO:0019827	4.42317			GO:0042612	17.3594	GO:0045177	6.90031	GO:0072001	20.8147	GO:1902495	4.80316	GO:0044849	8.41868	GO:0099501	59.9436	GO:0099177	8.00547			GO:0000793	82.0192	GO:0071007	9.28737					GO:0000118	15.3459
18	GO:0005788	33.2765	GO:0035329	4.42317			GO:0009897	17.5653	GO:0043218	11.487			GO:0098802	4.91642			GO:0070382	60.8399	GO:0050808	11.6046			GO:0000228	89.0037	GO:0005681	9.28737					GO:0061695	15.737
19	GO:0005604	39.1017	GO:0098727	4.42317			GO:0030139	17.5653	GO:0043209	24.7809			GO:0005892	6.72138			GO:0008021	64.1034	GO:0098742	32.1269			GO:0000775	90.3895	GO:0035770	10.3759					GO:0070603	25.8165
20	GO:0062023	84.5855	GO:0061351	4.42317			GO:0062023	17.8136	GO:0010001	15.5062			GO:0034702	6.72138			GO:0097060	71.2848	GO:0007156	39.7896			GO:0098687	129.53	GO:0034719	10.5135					GO:0016607	29.3931
21	GO:0036293	20.8212	GO:0070849	4.42317			GO:0019221	21.2253	GO:0042063	16.3423			GO:1902075	3.23994			GO:0001505	41.4886					GO:0044772	81.3478	GO:0000377	10.2892					GO:0006403	27.1604
22	GO:0006956	21.1336	GO:0022612	4.42317			GO:0003018	21.4004	GO:0021782	16.5083			GO:0031623	3.23994			GO:0006836	45.8197					GO:0000070	91.0525	GO:0071826	11.3718					GO:0050657	27.7949
23	GO:0050817	21.6579					GO:0002831	22.6385	GO:0022010	19.5693			GO:0007271	3.23994			GO:0042391	46.1777					GO:0006261	91.5743	GO:0000375	11.7841					GO:0050658	27.7949
24	GO:0001666	21.6579					GO:0042060	24.6693	GO:0032291	19.5693			GO:0050433	3.23994			GO:0016079	55.1127					GO:0000819	93.8479	GO:0022618	11.9935					GO:0008380	28.0402
25	GO:0007596	21.9832					GO:0044282	33.5493	GO:0048709	21.0974			GO:0095500	3.23994			GO:0007269	55.88					GO:0140014	98.5731	GO:0008380	13.7706					GO:0051236	28.103
26	GO:0007599	25.2297					GO:0016054	34.4803	GO:0014003	22.0783			GO:0050432	3.23994			GO:0099643	55.88					GO:0048285	100.475	GO:0006413	15.4563					GO:0051028	28.2289
27	GO:0042060	32.2021					GO:0046395	34.4803	GO:0042552	31.2177			GO:1905145	3.23994			GO:0050804	67.6481					GO:0098813	108.292	GO:0006397	15.7855					GO:0006405	28.4243
28	GO:0030198	32.2021					GO:0051607	36.0647	GO:0007272	33.0391			GO:0051952	3.23994			GO:0099177	67.6481					GO:0000280	108.292	GO:0034470	15.9257					GO:0006397	30.5579
29	GO:0043062	32.2021					GO:0140546	36.0647	GO:0008366	33.0391			GO:1905144	3.62138			GO:0099003	70.775					GO:0006260	113.905	GO:0042254	22.5675					GO:0016570	50.9637
30	GO:0045229	32.2021					GO:0009615	39.3753					GO:1902074	3.62138			GO:0099504	71.4689					GO:0007059	129.342	GO:0022613	40.6641					GO:0006338	55.4215

## Sheet: KEGG
	Cluster	category	subcategory	ID	Description	GeneRatio	BgRatio	pvalue	p.adjust	qvalue	geneID	Count	Log_qvalue
1	ME_salmon	Organismal Systems	Immune system	hsa04610	Complement and coagulation cascades	21/207	88/8546	1.01717e-15	2.49207e-13	2.06646e-13	712/713/714/715/716/721/728/730/3075/3426/2162/3689/5327/5329/5265/5054/710/7035/7056/11326/7450	21	12.6848
2	ME_salmon	Environmental Information Processing	Signaling molecules and interaction	hsa04512	ECM-receptor interaction	19/207	89/8546	2.22906e-13	2.7306e-11	2.26425e-11	960/1277/1278/1282/1284/1291/1292/1293/2335/3339/22801/3678/3908/3910/3912/3915/10319/6696/7450	19	10.6451
3	ME_salmon	Human Diseases	Infectious disease: parasitic	hsa05146	Amoebiasis	20/207	103/8546	3.40981e-13	2.78468e-11	2.3091e-11	383/929/1277/1278/1281/1282/1284/2919/2335/3553/3689/3908/3910/3912/3915/10319/5970/7040/7097/7414	20	10.6366
4	ME_salmon	NA	NA	hsa04820	Cytoskeleton in muscle cells	28/207	232/8546	1.33737e-12	8.19138e-11	6.79242e-11	72/480/633/1277/1278/1281/1282/1284/1289/1291/1292/1293/1824/2006/2200/2273/2335/3339/22801/3678/3908/4635/4811/8572/9260/7140/7168/7414	28	10.168
5	ME_salmon	Organismal Systems	Digestive system	hsa04974	Protein digestion and absorption	18/207	105/8546	4.93718e-11	2.41922e-09	2.00605e-09	480/7373/1306/80781/1277/1278/1281/1282/1284/1289/1291/1292/1293/1295/2006/486/3784/7512	18	8.69766
6	ME_salmon	Cellular Processes	Cellular community - eukaryotes	hsa04510	Focal adhesion	24/207	203/8546	9.43814e-11	3.85391e-09	3.19572e-09	857/1277/1278/1282/1284/1291/1292/1293/2012/2335/22801/3678/3908/3910/3912/3915/10319/5228/5880/6696/7408/7414/7422/7450	24	8.49543
7	ME_salmon	Human Diseases	Infectious disease: parasitic	hsa05144	Malaria	12/207	50/8546	1.60437e-09	5.6153e-08	4.65629e-08	6347/2993/2994/2995/3039/3040/3043/3553/3689/6401/7040/7097	12	7.33196
8	ME_salmon	Environmental Information Processing	Signal transduction	hsa04151	PI3K-Akt signaling pathway	30/207	362/8546	2.60714e-09	7.98438e-08	6.62077e-08	285/1277/1278/1282/1284/1291/1292/1293/2056/2057/2335/2997/3481/22801/3678/3908/3910/3912/3915/10319/4803/5008/9180/5228/146850/5970/6696/7097/7422/7450	30	7.17909
9	ME_salmon	Human Diseases	Endocrine and metabolic disease	hsa04933	AGE-RAGE signaling pathway in diabetic complications	15/207	101/8546	1.65658e-08	4.50957e-07	3.73941e-07	6347/1277/1278/1281/1282/1284/2335/3553/4313/5970/6401/5054/7040/7056/7422	15	6.4272
10	ME_salmon	Human Diseases	Infectious disease: bacterial	hsa05150	Staphylococcus aureus infection	15/207	102/8546	1.90116e-08	4.65784e-07	3.86236e-07	712/713/714/715/716/721/728/3075/3426/2209/2212/2214/2357/3123/3689	15	6.41315
11	ME_salmon	Human Diseases	Infectious disease: bacterial	hsa05133	Pertussis	13/207	78/8546	3.73981e-08	8.32958e-07	6.90702e-07	712/713/714/715/716/721/929/2353/3553/3678/3689/5970/710	13	6.16071
12	ME_salmon	Human Diseases	Infectious disease: parasitic	hsa05145	Toxoplasmosis	14/207	112/8546	4.57739e-07	9.3455e-06	7.74944e-06	79444/3123/3587/3588/3908/3910/3912/3915/10319/5606/146850/5970/7040/7097	14	5.11073
13	ME_salmon	Human Diseases	Infectious disease: parasitic	hsa05140	Leishmaniasis	11/207	79/8546	2.75773e-06	5.19726e-05	4.30965e-05	1535/2209/2212/2214/2353/3123/3553/3689/5970/7040/7097	11	4.36556
14	ME_salmon	Human Diseases	Cancer: specific types	hsa05222	Small cell lung cancer	11/207	93/8546	1.38307e-05	0.000242037	0.000200701	79444/1282/1284/2335/1647/3908/3910/3912/3915/10319/5970	11	3.69745
15	ME_salmon	Environmental Information Processing	Signaling molecules and interaction	hsa04060	Cytokine-cytokine receptor interaction	20/207	298/8546	3.38638e-05	0.000536636	0.000444987	650/654/6358/6359/6347/6351/2919/10148/2056/2057/9518/3587/3588/27190/3553/3557/4803/5008/9180/7040	20	3.35165
16	ME_salmon	Human Diseases	Cardiovascular disease	hsa05418	Fluid shear stress and atherosclerosis	13/207	141/8546	3.50456e-05	0.000536636	0.000444987	857/6347/1535/2353/3162/3553/4313/5327/5880/5970/6401/7056/7422	13	3.35165
17	ME_salmon	Human Diseases	Infectious disease: viral	hsa05171	Coronavirus disease - COVID-19	17/207	238/8546	6.22281e-05	0.000896816	0.000743654	712/713/714/715/716/721/728/730/6347/2162/2212/2353/1839/3553/5970/7097/7450	17	3.12863
18	ME_salmon	Human Diseases	Infectious disease: bacterial	hsa05152	Tuberculosis	14/207	182/8546	0.000128754	0.00175249	0.00145319	929/2207/2209/2212/2214/3123/3587/3588/3553/3689/5970/8767/7040/7097	14	2.83768
19	ME_salmon	Environmental Information Processing	Signal transduction	hsa04668	TNF signaling pathway	11/207	119/8546	0.000138062	0.00178027	0.00147623	6347/2919/2353/3553/5606/1326/4323/5970/79651/6401/9021	11	2.83085
20	ME_salmon	Organismal Systems	Development and regeneration	hsa04380	Osteoclast differentiation	12/207	143/8546	0.000174046	0.00207014	0.00171659	1535/2209/2212/2214/2353/3553/126014/5970/9021/6688/7040/7305	12	2.76533
21	ME_salmon	Human Diseases	Infectious disease: parasitic	hsa05142	Chagas disease	10/207	103/8546	0.000185553	0.00207014	0.00171659	712/713/714/6347/2353/3553/5970/5054/7040/7097	10	2.76533
22	ME_salmon	Human Diseases	Endocrine and metabolic disease	hsa04936	Alcoholic liver disease	12/207	144/8546	0.00018589	0.00207014	0.00171659	125/51094/712/713/714/721/728/929/2919/3553/5606/5970	12	2.76533
23	ME_salmon	Human Diseases	Infectious disease: parasitic	hsa05143	African trypanosomiasis	6/207	37/8546	0.000233179	0.00248387	0.00205966	3039/3040/3043/3553/3910/6401	6	2.6862
24	ME_salmon	Organismal Systems	Endocrine system	hsa04926	Relaxin signaling pathway	11/207	130/8546	0.000301763	0.0030805	0.0025544	59/1277/1278/1281/1282/1284/2353/4313/5970/7040/7422	11	2.59271
25	ME_salmon	Human Diseases	Infectious disease: bacterial	hsa05134	Legionellosis	7/207	56/8546	0.000374409	0.00366921	0.00304257	664/929/2919/3553/3689/5970/7097	7	2.51676
26	ME_salmon	Human Diseases	Cancer: overview	hsa05205	Proteoglycans in cancer	14/207	204/8546	0.000421572	0.0039725	0.00329406	857/960/1277/1278/2335/1839/3339/3481/3678/4313/5329/7040/7097/7422	14	2.48227
27	ME_salmon	Human Diseases	Infectious disease: viral	hsa05165	Human papillomavirus infection	19/207	333/8546	0.000443221	0.00402182	0.00333496	1277/1278/1282/1284/1291/1292/1293/2335/22801/3678/3908/3910/3912/3915/10319/5970/6696/7422/7450	19	2.47691
28	ME_salmon	Human Diseases	Immune disease	hsa05323	Rheumatoid arthritis	9/207	95/8546	0.000467492	0.00409055	0.00339195	6347/2919/2353/3123/3553/3689/7040/7097/7422	9	2.46955
29	ME_salmon	Human Diseases	Immune disease	hsa05322	Systemic lupus erythematosus	11/207	141/8546	0.000605588	0.00511617	0.00424241	712/713/714/715/716/721/730/2209/2212/2214/3123	11	2.37239
30	ME_salmon	Organismal Systems	Immune system	hsa04640	Hematopoietic cell lineage	9/207	100/8546	0.000682019	0.00556983	0.00461859	929/960/2056/2057/2209/2993/3123/3553/3678	9	2.33549
31	ME_salmon	Organismal Systems	Immune system	hsa04620	Toll-like receptor signaling pathway	9/207	109/8546	0.00126776	0.0100194	0.00830822	6351/929/2353/3553/5606/1326/5970/6696/7097	9	2.08049
32	ME_salmon	Cellular Processes	Transport and catabolism	hsa04145	Phagosome	11/207	159/8546	0.00162884	0.0124708	0.010341	715/929/1535/2209/2212/2214/3123/3678/3689/4481/7097	11	1.98544
33	ME_salmon	Human Diseases	Infectious disease: bacterial	hsa05135	Yersinia infection	10/207	138/8546	0.00186821	0.01387	0.0115012	6347/2212/2335/2353/3553/3678/5606/5880/5970/7454	10	1.93926
34	ME_salmon	Organismal Systems	Immune system	hsa04613	Neutrophil extracellular trap formation	12/207	193/8546	0.0025066	0.0180623	0.0149775	728/1535/2209/2212/2214/2357/3689/5880/5970/27180/7097/7450	12	1.82456
35	ME_salmon	Organismal Systems	Immune system	hsa04611	Platelet activation	9/207	126/8546	0.00344207	0.0240945	0.0199795	1277/1278/1281/2207/2212/83706/146850/7408/7450	9	1.69941
36	ME_salmon	NA	NA	hsa04148	Efferocytosis	10/207	157/8546	0.00475921	0.0323891	0.0268576	383/712/713/714/9023/2056/2057/6566/23166/7040	10	1.57093
37	ME_salmon	Environmental Information Processing	Signal transduction	hsa04066	HIF-1 signaling pathway	8/207	110/8546	0.00512878	0.0339609	0.0281609	285/2056/3162/3939/5970/5054/7076/7422	8	1.55035
38	ME_salmon	Human Diseases	Immune disease	hsa05310	Asthma	4/207	32/8546	0.00706713	0.0455644	0.0377827	2207/3123/5553/6037	4	1.42271
39	ME_lightcyan	Environmental Information Processing	Signal transduction	hsa04330	Notch signaling pathway	9/125	62/8546	2.42273e-07	6.22643e-05	5.177e-05	3065/388585/23493/182/3955/23385/4853/4854/441478	9	4.28592
40	ME_lightcyan	Environmental Information Processing	Signal transduction	hsa04392	Hippo signaling pathway - multiple species	5/125	29/8546	5.53759e-05	0.00516146	0.00429153	26524/6788/7005/7004/25937	5	2.36739
41	ME_lightcyan	Cellular Processes	Cellular community - eukaryotes	hsa04520	Adherens junction	8/125	93/8546	6.02505e-05	0.00516146	0.00429153	1495/1956/2064/57493/8826/51176/10163/7525	8	2.36739
42	ME_lightcyan	Human Diseases	Cancer: specific types	hsa05224	Breast cancer	9/125	148/8546	0.000304732	0.019579	0.0162791	369/1956/2064/388585/23493/182/51176/4853/4854	9	1.78837
43	ME_brown	Organismal Systems	Endocrine system	hsa03320	PPAR signaling pathway	22/863	76/8546	3.40651e-06	0.000796687	0.000625285	30/8309/23205/51703/335/336/1374/1376/1622/1962/3611/4199/10062/5106/5346/440503/5360/5465/6256/6319/376497/10998	22	3.20392
44	ME_brown	Metabolism	Amino acid metabolism	hsa00260	Glycine, serine and threonine metabolism	15/863	41/8546	5.22976e-06	0.000796687	0.000625285	501/55349/29958/2628/23464/2653/9380/4128/4129/51268/29968/5723/1757/10993/113675	15	3.20392
45	ME_brown	Human Diseases	Infectious disease: viral	hsa05164	Influenza A	37/863	173/8546	6.98848e-06	0.000796687	0.000625285	317/578/10241/834/6352/4261/3627/355/3108/3113/3127/3383/64135/3455/3459/3592/3606/3661/3665/10379/4599/4600/4792/79671/4938/4939/4940/8480/6041/91543/7098/7099/8797/7132/8743/8717/7706	37	3.20392
46	ME_brown	Metabolism	Amino acid metabolism	hsa00280	Valine, leucine and isoleucine degradation	16/863	48/8546	1.02171e-05	0.000850398	0.000667441	18/30/35/217/4329/501/223/587/1962/3032/11112/26275/3155/3712/64087/5095	16	3.17559
47	ME_brown	Environmental Information Processing	Signaling molecules and interaction	hsa04060	Cytokine-cytokine receptor interaction	54/863	298/8546	1.24327e-05	0.000850398	0.000667441	94/655/656/658/6363/10344/6352/6355/939/920/1435/1440/1489/3627/6373/6387/9547/58191/2920/2921/6374/4283/3577/355/10220/3455/3459/3592/3597/3601/53342/55540/84818/3606/3554/51561/3561/9235/3566/3570/3624/4055/768211/7043/7048/8797/51330/8764/7132/7133/8743/8742/8741/10673	54	3.17559
48	ME_brown	Human Diseases	Infectious disease: viral	hsa05160	Hepatitis C	34/863	159/8546	1.64254e-05	0.000936246	0.000734819	317/578/595/975/1026/8837/9071/7122/3627/355/3434/3455/3661/3665/10379/4599/4600/4792/10062/4938/4939/4940/100506658/5465/55844/8737/6041/91543/6256/949/6774/7098/7132/8717	34	3.13382
49	ME_brown	Organismal Systems	Immune system	hsa04621	NOD-like receptor signaling pathway	38/863	189/8546	2.35493e-05	0.00115055	0.000903017	9447/55054/114769/84674/834/100506742/837/6352/2920/2921/1668/2633/2634/2635/115361/63940/79792/3428/3455/3606/3661/3665/10379/3709/3710/5599/4792/79671/10392/4938/4939/4940/24145/387/8737/6041/7099/7128	38	3.0443
50	ME_brown	Cellular Processes	Cell growth and death	hsa04210	Apoptosis	30/863	137/8546	3.17691e-05	0.00135813	0.00106594	317/578/843/100506742/8837/1512/1519/1521/1522/1649/355/4616/3002/8739/3709/3710/4000/4217/5599/4792/10038/10039/5366/5551/8737/8797/7132/8743/8717/84790	30	2.97227
51	ME_brown	Human Diseases	Cardiovascular disease	hsa05416	Viral myocarditis	19/863	70/8546	4.26043e-05	0.00161896	0.00127066	595/1604/1837/3105/3106/3107/3108/3113/3127/3133/3134/3135/3383/5551/6444/8910/6640/6641/8082	19	2.89597
52	ME_brown	Metabolism	Lipid metabolism	hsa00071	Fatty acid degradation	14/863	43/8546	4.91882e-05	0.00168224	0.00132032	30/35/23205/51703/217/501/223/1374/1376/113612/1632/1962/2639/3032	14	2.87932
53	ME_brown	Human Diseases	Infectious disease: viral	hsa05168	Herpes simplex virus 1 infection	36/863	182/8546	5.5112e-05	0.00171348	0.00134484	317/567/578/684/6352/972/355/3105/3106/3107/3108/3113/3127/3133/3134/3135/64135/3455/3459/3592/3661/3665/10379/4792/4938/4939/4940/6041/6672/6890/6891/7098/8764/7132/8717/56829	36	2.87133
54	ME_brown	Human Diseases	Endocrine and metabolic disease	hsa04940	Type I diabetes mellitus	14/863	44/8546	6.55269e-05	0.00182101	0.00142923	1363/355/3002/3105/3106/3107/3108/3113/3127/3133/3134/3135/3592/5551	14	2.8449
55	ME_brown	Human Diseases	Immune disease	hsa05330	Allograft rejection	13/863	39/8546	6.92197e-05	0.00182101	0.00142923	355/3002/3105/3106/3107/3108/3113/3127/3133/3134/3135/3592/5551	13	2.8449
56	ME_brown	Metabolism	Amino acid metabolism	hsa00330	Arginine and proline metabolism	15/863	50/8546	7.77335e-05	0.00189892	0.00149038	217/8659/501/223/1160/2628/112817/51056/4128/4129/4846/5625/29920/6303/54498	15	2.8267
57	ME_brown	Environmental Information Processing	Signal transduction	hsa04668	TNF signaling pathway	26/863	119/8546	0.000109477	0.00249607	0.00195906	602/843/6352/8837/1435/3627/2920/2921/6374/1906/355/83786/3383/3659/3726/4217/5599/197259/4792/64285/8737/7128/7132/7133/8717/7424	26	2.70795
58	ME_brown	Environmental Information Processing	Signaling molecules and interaction	hsa04061	Viral protein interaction with cytokine and cytokine receptor	23/863	100/8546	0.000118932	0.00254217	0.00199524	6363/10344/6352/6355/1435/3627/6373/6387/9547/2920/2921/6374/4283/3577/3606/3561/3570/4055/8797/8764/7132/7133/8743	23	2.70001
59	ME_brown	Organismal Systems	Endocrine system	hsa04920	Adipocytokine signaling pathway	18/863	70/8546	0.000144517	0.0028383	0.00222766	32/23205/51703/181/1374/92579/5599/4792/5106/5443/5465/6256/6513/6517/6774/7132/7133/8717	18	2.65215
60	ME_brown	Human Diseases	Immune disease	hsa05323	Rheumatoid arthritis	22/863	95/8546	0.000149384	0.0028383	0.00222766	54/50617/8992/6352/1435/6387/2920/2921/6374/2321/3108/3113/3127/3383/3606/51561/10312/7010/7043/7099/8741/10673	22	2.65215
61	ME_brown	Human Diseases	Infectious disease: viral	hsa05169	Epstein-Barr virus infection	37/863	204/8546	0.000282041	0.00507674	0.00398451	317/567/578/595/965/1026/3627/355/4616/3105/3106/3107/3108/3113/3127/3133/3134/3135/3383/3455/3661/3665/10379/9636/4067/5599/4791/4792/4938/4939/4940/8737/6774/6890/6891/7128/8717	37	2.39962
62	ME_brown	Organismal Systems	Immune system	hsa04612	Antigen processing and presentation	19/863	81/8546	0.000348176	0.00595381	0.00467289	567/920/972/4261/3105/3106/3107/3108/3113/3127/3133/3134/3135/3822/3823/8302/5720/6890/6891	19	2.33041
63	ME_brown	Metabolism	Global and overview maps	hsa01212	Fatty acid metabolism	15/863	57/8546	0.000388253	0.00632297	0.00496263	30/35/23205/51703/1374/1376/1962/60481/79071/79993/3032/51144/7923/6319/9524	15	2.30429
64	ME_brown	Human Diseases	Infectious disease: viral	hsa05167	Kaposi sarcoma-associated herpesvirus infection	35/863	196/8546	0.000550819	0.00856274	0.00672052	578/595/1026/9976/2920/2921/355/2247/2791/2793/3105/3106/3107/3133/3134/3135/3383/3455/3459/3661/3665/10379/3709/3710/4067/5599/100507436/4772/4792/5155/57580/6774/7098/7132/8717	35	2.1726
65	ME_brown	Environmental Information Processing	Signaling molecules and interaction	hsa04514	Cell adhesion molecules	30/863	160/8546	0.000585242	0.00870229	0.00683005	947/920/965/1003/9071/7122/90952/50848/3105/3106/3107/3108/3113/3127/3133/3134/3135/3383/3384/3385/152404/3655/3685/58494/100506658/6383/6385/6402/6614/84631	30	2.16558
66	ME_brown	Environmental Information Processing	Signal transduction	hsa04064	NF-kappa B signaling pathway	22/863	105/8546	0.000666781	0.00950162	0.00745741	6363/8837/6387/2920/2921/128178/4616/3383/3554/4055/4067/4791/4792/5328/10848/8737/7099/7128/7132/10673/8717/7706	22	2.12741
67	ME_brown	Metabolism	Carbohydrate metabolism	hsa00640	Propanoate metabolism	10/863	32/8546	0.000850842	0.0111965	0.00878761	18/32/35/84532/79611/4329/1962/26275/5095/8801	10	2.05613
68	ME_brown	Environmental Information Processing	Signal transduction	hsa04020	Calcium signaling pathway	42/863	254/8546	0.000851192	0.0111965	0.00878761	196883/136/148/154/952/57105/1910/2247/2263/2261/2321/2324/9630/3082/3270/3707/3709/3710/3791/4638/85366/4772/4846/4915/84876/93129/5021/22953/5155/5159/5255/5260/5333/84812/5350/10105/6261/6915/7125/53373/7423/7424	42	2.05613
69	ME_brown	NA	NA	hsa04820	Cytoskeleton in muscle cells	39/863	232/8546	0.000933488	0.0118242	0.00928029	477/482/1286/50509/1465/1466/23002/1634/1674/1837/2023/2199/3672/3655/3679/3685/3693/4000/25802/4604/4629/22989/4627/4634/10398/58529/10529/10611/6383/6385/6444/8910/6640/6641/8082/7060/7094/7125/7169	39	2.03244
70	ME_brown	Metabolism	Global and overview maps	hsa01200	Carbon metabolism	23/863	116/8546	0.00113438	0.0138557	0.0108747	35/84532/4329/230/847/2023/2653/2746/2747/2875/84706/26275/80201/4191/4199/5095/5226/29968/5723/9104/10993/113675/8801	23	1.96358
71	ME_brown	Human Diseases	Immune disease	hsa05332	Graft-versus-host disease	12/863	45/8546	0.00128662	0.0151732	0.0119088	355/3002/3105/3106/3107/3108/3113/3127/3133/3134/3135/5551	12	1.92413
72	ME_brown	Organismal Systems	Immune system	hsa04650	Natural killer cell mediated cytotoxicity	25/863	134/8546	0.00174837	0.0199314	0.0156433	962/355/2215/3002/3105/3106/3107/3133/3135/3383/3384/3455/3459/3822/3823/22914/3937/100507436/4772/5551/6464/25759/8797/8743/80328	25	1.80567
73	ME_brown	Human Diseases	Immune disease	hsa05320	Autoimmune thyroid disease	13/863	54/8546	0.00226276	0.0249633	0.0195926	355/3002/3105/3106/3107/3108/3113/3127/3133/3134/3135/5551/7252	13	1.70791
74	ME_brown	Cellular Processes	Cell growth and death	hsa04217	Necroptosis	28/863	159/8546	0.00235138	0.0251303	0.0197237	834/8837/29082/92421/91782/355/2495/2512/2746/2747/2752/3455/3459/10379/5599/197259/5321/5837/8737/6774/6776/7098/7099/7128/8797/7132/8743/8717	28	1.70501
75	ME_brown	Organismal Systems	Digestive system	hsa04978	Mineral absorption	14/863	61/8546	0.00252435	0.0261614	0.020533	477/482/79901/2495/2512/9843/4489/4493/4494/4495/4499/4501/4502/30061	14	1.68755
76	ME_brown	Organismal Systems	Immune system	hsa04657	IL-17 signaling pathway	19/863	95/8546	0.00266729	0.0265987	0.0208762	51433/1440/3627/2920/2921/6374/8061/53342/55540/84818/3727/5596/5599/4792/6279/6280/7128/8717/10758	19	1.68035
77	ME_brown	Metabolism	Metabolism of other amino acids	hsa00410	beta-Alanine metabolism	9/863	31/8546	0.00272209	0.0265987	0.0208762	18/35/217/4329/501/223/1962/26275/54498	9	1.68035
78	ME_brown	Metabolism	Amino acid metabolism	hsa00250	Alanine, aspartate and glutamate metabolism	10/863	37/8546	0.00288386	0.02716	0.0213167	18/8659/7915/80150/2746/2747/2752/2875/84706/57494	10	1.67128
79	ME_brown	Human Diseases	Infectious disease: viral	hsa05162	Measles	25/863	139/8546	0.00293836	0.02716	0.0213167	317/578/595/30835/355/64135/3455/3592/3561/3661/3665/10379/5599/4599/4600/4792/4938/4939/4940/9367/6774/6776/7099/7128/8717	25	1.67128
80	ME_brown	Human Diseases	Infectious disease: viral	hsa05166	Human T-cell leukemia virus 1 infection	36/863	224/8546	0.00318887	0.0286999	0.0225253	196883/51433/51434/567/595/920/1026/1030/2113/8061/3105/3106/3107/3108/3113/3127/3133/3134/3135/3383/3601/3554/3561/8850/4055/5599/4772/4791/4792/6513/6776/6908/7043/7048/7094/7132	36	1.64733
81	ME_brown	Cellular Processes	Transport and catabolism	hsa04142	Lysosome	24/863	133/8546	0.00337441	0.0289861	0.0227499	54/22901/50617/967/1203/1497/5476/1512/1519/1521/1522/1777/2519/2548/2760/84572/3073/3373/4669/10577/6448/285362/10312/1200	24	1.64302
82	ME_brown	Human Diseases	Infectious disease: parasitic	hsa05144	Malaria	12/863	50/8546	0.00339018	0.0289861	0.0227499	975/1440/3082/3383/3592/3606/3820/22914/6383/7043/7060/7099	12	1.64302
83	ME_brown	Human Diseases	Cardiovascular disease	hsa05418	Fluid shear stress and atherosclerosis	25/863	141/8546	0.00357729	0.0298398	0.02342	9181/658/858/1003/1843/1906/2948/2949/3383/3554/3685/3791/10365/4217/5599/4257/4258/4780/4846/1728/5155/387/6383/6385/7132	25	1.63041
84	ME_brown	Cellular Processes	Cellular community - eukaryotes	hsa04510	Focal adhesion	33/863	203/8546	0.00386768	0.031494	0.0247183	81/858/595/1286/1793/2013/2321/2324/3082/3611/3672/3655/3679/3685/3693/3791/3913/5599/10627/10398/4638/85366/55742/5155/5159/5829/387/6464/25759/7060/7094/7423/7424	33	1.60698
85	ME_brown	Metabolism	Metabolism of cofactors and vitamins	hsa00670	One carbon pool by folate	10/863	39/8546	0.00437226	0.0347748	0.0272932	10768/23382/10840/501/23743/55349/29958/2653/25902/1757	10	1.56395
86	ME_brown	Cellular Processes	Transport and catabolism	hsa04145	Phagosome	27/863	159/8546	0.00468578	0.0360811	0.0283185	50617/8992/30835/81035/2215/3105/3106/3107/3108/3113/3127/3133/3134/3135/3685/3693/8685/83547/949/6890/6891/10312/7037/7060/7099/84790/203068	27	1.54793
87	ME_brown	Organismal Systems	Immune system	hsa04640	Hematopoietic cell lineage	19/863	100/8546	0.0048388	0.0360811	0.0283185	290/947/952/920/1604/966/928/1435/1440/2323/3108/3113/3127/3554/3566/3570/3672/3655/7037	19	1.54793
88	ME_brown	Metabolism	Metabolism of other amino acids	hsa00430	Taurine and hypotaurine metabolism	6/863	17/8546	0.00485301	0.0360811	0.0283185	2327/2328/2329/2330/2678/2687	6	1.54793
89	ME_brown	Metabolism	Metabolism of other amino acids	hsa00480	Glutathione metabolism	13/863	59/8546	0.00515193	0.0374885	0.0294231	290/2678/2687/2878/373156/2948/2949/51056/4257/4258/26873/5226/9588	13	1.53131
90	ME_brown	Human Diseases	Endocrine and metabolic disease	hsa04931	Insulin resistance	20/863	109/8546	0.00586291	0.0411675	0.0323106	32/183/1374/92579/5599/4792/4846/7376/10062/5106/5465/5507/5509/5837/376497/10998/6513/6517/6774/7132	20	1.49065
91	ME_brown	Organismal Systems	Endocrine system	hsa04614	Renin-angiotensin system	7/863	23/8546	0.00601864	0.0411675	0.0323106	183/290/5476/2028/57486/5547/5550	7	1.49065
92	ME_brown	Organismal Systems	Excretory system	hsa04964	Proximal tubule bicarbonate reclamation	7/863	23/8546	0.00601864	0.0411675	0.0323106	477/482/2746/2747/5106/10991/8671	7	1.49065
93	ME_brown	Human Diseases	Infectious disease: bacterial	hsa05132	Salmonella infection	38/863	251/8546	0.00694119	0.0465468	0.0365326	10121/79026/26084/10095/578/834/837/1785/55770/60412/29109/79443/79792/3606/5599/197259/10627/10398/4646/4792/10392/5286/5420/9367/387/388/57381/83547/8737/6237/257364/7099/8797/7132/8743/8717/84790/203068	38	1.43732
94	ME_white	Environmental Information Processing	Signaling molecules and interaction	hsa04512	ECM-receptor interaction	6/62	89/8546	4.1444e-05	0.00245928	0.00207097	256076/131873/158326/341640/6382/3371	6	2.68383
95	ME_white	Cellular Processes	Cellular community - eukaryotes	hsa04550	Signaling pathways regulating pluripotency of stem cells	7/62	144/8546	7.55561e-05	0.00245928	0.00207097	2103/11211/64211/4211/7481/7474/7477	7	2.68383
96	ME_white	Human Diseases	Cancer: specific types	hsa05217	Basal cell carcinoma	5/62	63/8546	8.67982e-05	0.00245928	0.00207097	11211/2735/7481/7474/7477	5	2.68383
97	ME_white	Human Diseases	Endocrine and metabolic disease	hsa04934	Cushing syndrome	7/62	155/8546	0.000120133	0.00255283	0.00214975	185/23746/11211/50940/7481/7474/7477	7	2.66761
98	ME_white	Human Diseases	Cancer: specific types	hsa05224	Breast cancer	6/62	148/8546	0.000674309	0.0102525	0.00863368	9965/2248/11211/7481/7474/7477	6	2.0638
99	ME_white	Human Diseases	Cancer: specific types	hsa05226	Gastric cancer	6/62	150/8546	0.000723706	0.0102525	0.00863368	9965/2248/11211/7481/7474/7477	6	2.0638
100	ME_white	Environmental Information Processing	Signal transduction	hsa04310	Wnt signaling pathway	6/62	174/8546	0.001563	0.0189793	0.0159826	11211/55366/4163/7481/7474/7477	6	1.79635
101	ME_white	Organismal Systems	Development and regeneration	hsa04360	Axon guidance	6/62	184/8546	0.00207636	0.0220613	0.0185779	2046/223117/57556/80031/8633/7474	6	1.731
102	ME_white	Human Diseases	Infectious disease: viral	hsa05165	Human papillomavirus infection	8/62	333/8546	0.00263164	0.0248543	0.02093	256076/131873/92359/11211/3371/7481/7474/7477	8	1.67923
103	ME_white	Human Diseases	Cancer: overview	hsa05205	Proteoglycans in cancer	6/62	204/8546	0.00347581	0.0295444	0.0248795	11211/2719/6382/7481/7474/7477	6	1.60416
104	ME_white	Organismal Systems	Endocrine system	hsa04916	Melanogenesis	4/62	101/8546	0.00606823	0.0468909	0.0394871	11211/7481/7474/7477	4	1.40355
105	ME_darkturquoise	Environmental Information Processing	Signaling molecules and interaction	hsa04080	Neuroactive ligand-receptor interaction	17/81	370/8546	4.63172e-08	8.56867e-06	8.04456e-06	146/1135/1136/1137/8973/1392/2569/11255/3363/130574/130576/4159/129521/387129/344838/5617/6753	17	5.0945
106	ME_darkturquoise	NA	NA	hsa04082	Neuroactive ligand signaling	11/81	199/8546	2.41627e-06	0.000223505	0.000209834	43/114/146/1136/1137/8973/2569/11255/3363/4159/57084	11	3.67812
107	ME_darkturquoise	Human Diseases	Substance dependence	hsa05033	Nicotine addiction	4/81	41/8546	0.000581002	0.0358285	0.033637	1137/8973/2569/57084	4	1.47318
108	ME_darkturquoise	Organismal Systems	Nervous system	hsa04725	Cholinergic synapse	6/81	116/8546	0.00077889	0.0360237	0.0338202	43/114/1136/1137/8973/84699	6	1.47082
109	ME_darkolivegreen	Environmental Information Processing	Signaling molecules and interaction	hsa04080	Neuroactive ligand-receptor interaction	9/32	370/8546	5.6091e-06	0.000482383	0.000419206	2587/9248/116443/4986/4987/4988/113091/84109/7200	9	3.37757
110	ME_darkolivegreen	Organismal Systems	Endocrine system	hsa04916	Melanogenesis	4/32	101/8546	0.000512532	0.0220389	0.0191525	4254/6934/7473/54361	4	1.71777
111	ME_darkolivegreen	NA	NA	hsa04082	Neuroactive ligand signaling	5/32	199/8546	0.000785749	0.0225248	0.0195748	116443/4986/4987/4988/6570	5	1.7083
112	ME_darkolivegreen	Human Diseases	Cancer: specific types	hsa05217	Basal cell carcinoma	3/32	63/8546	0.00162607	0.0349604	0.0303817	6934/7473/54361	3	1.51739
113	ME_blue	Organismal Systems	Endocrine system	hsa04911	Insulin secretion	32/808	86/8546	2.54498e-12	8.50023e-10	6.00079e-10	6833/108/109/113/115/116/476/478/481/815/816/817/818/1131/90993/3767/3778/27345/3780/3783/27445/23236/5566/5568/5579/5582/5864/9699/6262/6616/6804/6844	32	9.22179
114	ME_blue	Organismal Systems	Nervous system	hsa04721	Synaptic vesicle cycle	29/808	79/8546	4.03506e-11	6.73855e-09	4.75712e-09	160/1173/535/527/9114/155066/523/526/528/51382/529/51606/1212/10815/10814/1759/8775/4905/5864/22999/57030/6534/6616/6804/112755/6812/6857/440279/6844	29	8.32266
115	ME_blue	Organismal Systems	Circulatory system	hsa04261	Adrenergic signaling in cardiomyocytes	40/808	154/8546	1.71735e-09	1.09121e-07	7.70345e-08	108/109/113/115/147/476/478/481/488/490/492/493/55799/782/783/785/10369/10368/59283/801/808/815/816/817/818/90993/5594/5603/23236/64208/5522/5526/5528/5566/5568/6262/6324/6543/6548/7139	40	7.11331
116	ME_blue	NA	NA	hsa04082	Neuroactive ligand signaling	47/808	199/8546	1.97788e-09	1.09121e-07	7.70345e-08	108/109/113/115/147/1128/1131/1141/1816/2550/9568/2554/2555/2557/2558/2560/2561/2563/2566/8001/2743/10681/2785/2891/2893/2902/2903/2918/3269/3351/3354/3355/3356/9177/3361/79627/4985/5026/9127/23236/5566/5568/5579/5582/57030/6866/6865	47	7.11331
117	ME_blue	Organismal Systems	Endocrine system	hsa04921	Oxytocin signaling pathway	40/808	155/8546	2.10995e-09	1.09121e-07	7.70345e-08	108/109/113/115/55799/782/783/785/10369/10368/59283/801/808/57172/815/816/817/818/10645/2002/3708/3760/3761/3765/5604/5607/5594/340156/23236/4660/5530/5534/5566/5568/51422/5579/5582/5743/6262/7226	40	7.11331
118	ME_blue	Organismal Systems	Nervous system	hsa04723	Retrograde endocannabinoid signaling	39/808	149/8546	2.16512e-09	1.09121e-07	7.70345e-08	57406/108/109/113/115/747/2166/2554/2555/2557/2558/2560/2561/2563/2566/10681/2785/2891/2893/3708/3760/3765/5594/5602/5603/5601/222236/4705/4719/4720/4723/23236/5566/5568/5579/5582/5743/22999/57030	39	7.11331
119	ME_blue	Organismal Systems	Environmental adaptation	hsa04713	Circadian entrainment	30/808	97/8546	2.28696e-09	1.09121e-07	7.70345e-08	108/109/113/115/116/8911/801/808/815/816/817/818/10681/2785/2891/2893/2902/2903/3708/3760/3765/5594/9722/8863/23236/5566/5568/5579/5582/6262	30	7.11331
120	ME_blue	Environmental Information Processing	Signal transduction	hsa04024	cAMP signaling pathway	50/808	226/8546	6.41542e-09	2.67844e-07	1.89086e-07	108/109/113/115/116/476/478/481/488/490/492/493/627/801/808/815/816/817/818/1128/1258/90993/1394/1816/2550/9568/2891/2893/2902/2903/610/3351/3354/3355/5604/5594/5602/5601/5058/5141/5143/5291/5295/64208/5566/5568/6262/6548/6750/7432	50	6.72334
121	ME_blue	Organismal Systems	Endocrine system	hsa04925	Aldosterone synthesis and secretion	29/808	98/8546	1.30426e-08	4.84027e-07	3.41702e-07	108/109/113/115/476/478/481/490/492/493/8911/801/808/57172/815/816/817/818/90993/747/3708/3777/5138/23236/5566/5568/5579/5582/6770	29	6.46635
122	ME_blue	Environmental Information Processing	Signal transduction	hsa04020	Calcium signaling pathway	53/808	254/8546	1.90589e-08	6.36569e-07	4.4939e-07	108/109/113/115/147/488/490/492/493/624/8911/801/808/57172/815/816/817/818/844/887/1128/1131/1816/2066/27006/2769/2902/2903/3269/3356/3361/3706/3708/4233/340156/4843/5026/9127/23236/5530/5534/5566/5568/5579/5582/2185/5979/6262/6543/56848/6786/6865/7416	53	6.34738
123	ME_blue	Organismal Systems	Digestive system	hsa04971	Gastric acid secretion	24/808	76/8546	5.90665e-08	1.79347e-06	1.26611e-06	108/109/113/115/476/478/481/801/808/815/816/817/818/887/1131/3708/340156/23236/5566/5568/5579/5582/6548/6750	24	5.89753
124	ME_blue	Organismal Systems	Nervous system	hsa04727	GABAergic synapse	26/808	89/8546	9.84646e-08	2.7406e-06	1.93474e-06	108/109/113/115/23710/2550/9568/2554/2555/2557/2558/2560/2561/2563/2566/2571/2744/27165/10681/2785/4905/5566/5568/5579/5582/57468	26	5.71338
125	ME_blue	Organismal Systems	Nervous system	hsa04728	Dopaminergic synapse	33/808	132/8546	1.24656e-07	3.20269e-06	2.26096e-06	801/808/50632/815/816/817/818/90993/1816/10681/2785/2891/2893/2903/3708/3760/3765/3798/3799/3800/5602/5603/5601/23236/5522/5526/5528/5530/5566/5568/5579/5582/6323	33	5.64571
126	ME_blue	Human Diseases	Substance dependence	hsa05032	Morphine addiction	26/808	91/8546	1.6121e-07	3.75473e-06	2.65068e-06	108/109/113/115/2550/9568/2554/2555/2557/2558/2560/2561/2563/2566/10681/2785/3760/3765/5138/5141/5143/8622/5566/5568/5579/5582	26	5.57664
127	ME_blue	Organismal Systems	Digestive system	hsa04970	Salivary secretion	27/808	97/8546	1.68626e-07	3.75473e-06	2.65068e-06	108/109/113/115/147/476/478/481/490/492/493/801/808/1131/3708/3778/3783/23236/653247/5554/5566/5568/5579/5582/6548/55503/6844	27	5.57664
128	ME_blue	Organismal Systems	Nervous system	hsa04724	Glutamatergic synapse	30/808	116/8546	2.09695e-07	4.16994e-06	2.9438e-06	108/109/113/115/1742/9229/2744/27165/10681/2785/2891/2893/2902/2903/2918/9456/3708/3760/5594/23154/23236/5530/5534/5566/5568/5579/5582/50944/85358/57030	30	5.53109
129	ME_blue	Environmental Information Processing	Signal transduction	hsa04070	Phosphatidylinositol signaling system	27/808	98/8546	2.12243e-07	4.16994e-06	2.9438e-06	801/808/10423/1040/8760/1606/8526/1608/1609/3612/64768/3706/3708/55361/5297/5288/5291/5295/79837/8395/23396/23236/9677/5579/5582/22908/8867	27	5.53109
130	ME_blue	Organismal Systems	Sensory system	hsa04750	Inflammatory mediator regulation of TRP channels	27/808	99/8546	2.66122e-07	4.93803e-06	3.48604e-06	108/109/113/115/624/801/808/815/816/817/818/3269/3356/3708/5602/5603/5601/5291/5295/8398/23236/5566/5568/5579/5580/5582/51393	27	5.45767
131	ME_blue	Organismal Systems	Nervous system	hsa04720	Long-term potentiation	21/808	67/8546	4.57757e-07	8.04688e-06	5.68075e-06	801/808/815/816/817/818/2891/2902/2903/3708/5604/5594/23236/5530/5534/5566/5568/5579/5582/6196/6197	21	5.24559
132	ME_blue	Organismal Systems	Excretory system	hsa04961	Endocrine and other factor-regulated calcium reabsorption	18/808	53/8546	8.0428e-07	1.34315e-05	9.48204e-06	115/160/1173/476/478/481/490/492/493/624/1212/1759/23236/5566/5568/5579/5582/6543	18	5.0231
133	ME_blue	Organismal Systems	Endocrine system	hsa04912	GnRH signaling pathway	25/808	93/8546	9.8936e-07	1.57355e-05	1.11086e-05	108/109/113/115/801/808/815/816/817/818/1958/2002/3708/5604/6416/5594/5602/5603/5601/23236/5566/5568/5579/5580/2185	25	4.95434
134	ME_blue	Environmental Information Processing	Signaling molecules and interaction	hsa04080	Neuroactive ligand-receptor interaction	63/808	370/8546	2.17796e-06	3.30654e-05	2.33427e-05	116/147/624/799/887/1128/1131/1141/1142/1394/1816/2550/9568/2554/2555/2557/2558/2560/2561/2563/2566/9340/8001/2743/10888/2891/2893/2902/2903/2918/3269/3351/3354/3355/3356/3361/3640/66004/4142/2847/84539/2831/2832/4887/2908/79627/4985/5026/9127/2834/5746/59350/51289/6750/6754/6866/6865/7068/10911/2837/7425/7432/7433	63	4.63185
135	ME_blue	Organismal Systems	Nervous system	hsa04725	Cholinergic synapse	28/808	116/8546	2.3818e-06	3.45879e-05	2.44176e-05	108/109/113/115/815/816/817/818/1128/1131/1141/90993/10681/2785/3708/3760/3761/9132/56479/5604/5594/5291/5295/23236/5566/5568/5579/5582	28	4.6123
136	ME_blue	Human Diseases	Infectious disease: bacterial	hsa05110	Vibrio cholerae infection	16/808	51/8546	1.05655e-05	0.000147037	0.000103802	109/115/375/537/535/527/9114/155066/523/526/528/51382/529/51606/5566/5568	16	3.9838
137	ME_blue	Human Diseases	Substance dependence	hsa05033	Nicotine addiction	14/808	41/8546	1.26265e-05	0.00016869	0.000119088	1141/2554/2555/2557/2558/2560/2561/2563/2566/2891/2893/2902/2903/57030	14	3.92413
138	ME_blue	Human Diseases	Substance dependence	hsa05031	Amphetamine addiction	19/808	69/8546	1.34675e-05	0.000173005	0.000122134	23237/801/808/815/816/817/818/90993/2891/2893/2902/2903/5530/5534/5566/5568/5579/5582/6804	19	3.91316
139	ME_blue	Organismal Systems	Endocrine system	hsa04929	GnRH secretion	18/808	65/8546	2.07983e-05	0.000257283	0.00018163	8911/2550/9568/348980/610/3708/3767/3760/3765/3780/3783/5604/5594/5291/5295/23236/5579/5582	18	3.74081
140	ME_blue	Environmental Information Processing	Signal transduction	hsa04022	cGMP-PKG signaling pathway	33/808	166/8546	2.72065e-05	0.000324535	0.000229107	108/109/113/115/147/476/478/481/488/490/492/493/624/801/808/1258/90993/3708/3778/27345/5604/5594/4205/4209/340156/4880/4985/5138/23236/5530/5534/6543/7416	33	3.63996
141	ME_blue	Human Diseases	Neurodegenerative disease	hsa05022	Pathways of neurodegeneration - multiple diseases	72/808	483/8546	5.06587e-05	0.000583448	0.000411889	5413/10120/351/9776/23130/488/6310/627/8678/801/808/815/816/817/818/842/1128/1131/1639/1742/2891/2893/2902/2903/3708/3798/3799/3800/3831/64837/120892/643246/5604/4294/5594/5602/5603/5601/9927/4705/4719/4720/4723/4843/29982/10133/30849/65018/23236/5530/5534/5579/5582/5621/5705/5743/6262/6389/6622/6647/6712/6804/29110/7277/51807/10382/7332/9217/7416/26100/7480/51384	72	3.38522
142	ME_blue	Organismal Systems	Nervous system	hsa04726	Serotonergic synapse	25/808	115/8546	5.53364e-05	0.000616078	0.000434925	242/351/260293/2560/2561/10681/2785/3351/3354/3355/3356/9177/3361/3708/3760/3765/5604/5594/23236/5566/5568/5579/5582/5742/5743	25	3.36159
143	ME_blue	Human Diseases	Infectious disease: bacterial	hsa05120	Epithelial cell signaling in Helicobacter pylori infection	18/808	71/8546	7.52666e-05	0.000810937	0.000572486	537/535/527/9114/155066/523/526/528/51382/529/51606/28964/6416/5602/5603/5601/4233/5058	18	3.24223
144	ME_blue	Environmental Information Processing	Signal transduction	hsa04371	Apelin signaling pathway	28/808	140/8546	9.74698e-05	0.00101734	0.000718199	108/109/113/115/8678/801/808/1958/10681/2785/3708/643246/5604/5594/4205/4209/340156/4843/30849/23236/10891/5566/5568/51422/6262/6543/6548/56848	28	3.14376
145	ME_blue	Cellular Processes	Transport and catabolism	hsa04142	Lysosome	26/808	133/8546	0.000251073	0.00254116	0.00179395	23457/53/162/8120/10947/11154/537/535/527/9114/51606/1212/1508/1509/23163/8692/3423/5641/4074/51172/135112/5538/5660/6609/6272/23335	26	2.74619
146	ME_blue	Organismal Systems	Endocrine system	hsa04927	Cortisol synthesis and secretion	16/808	65/8546	0.000269805	0.00265044	0.0018711	108/109/113/115/8911/90993/3708/3739/3777/56246/57552/8622/23236/5566/5568/6770	16	2.7279
147	ME_blue	Environmental Information Processing	Signal transduction	hsa04010	MAPK signaling pathway	47/808	300/8546	0.00033678	0.00321385	0.00226884	627/8911/55799/782/783/785/10369/10368/59283/1845/1848/1849/2002/2005/2066/27006/5604/6416/5607/4294/5871/5594/5602/5603/9479/23542/23162/5601/4233/51701/5058/5495/5530/5534/5536/5566/5568/5579/5582/5801/5923/5924/10125/5979/6196/6197/8986	47	2.6442
148	ME_blue	Cellular Processes	Transport and catabolism	hsa04144	Endocytosis	41/808	252/8546	0.00036069	0.0033464	0.00236241	116986/116988/273/160/1173/375/377/84364/10564/81873/51652/1212/9829/1759/30845/2060/28964/9922/23096/440073/3798/3799/3800/10015/8395/23396/5590/5662/23362/9727/84440/26056/5869/7879/6456/64744/51028/55048/8976/147179/11059	41	2.62664
149	ME_blue	Human Diseases	Infectious disease: bacterial	hsa05152	Tuberculosis	32/808	182/8546	0.000395262	0.00356804	0.00251888	537/535/527/9114/51606/801/808/815/816/817/818/842/11151/1509/3111/3118/3119/3120/3656/3716/5594/5602/5603/5601/4843/5530/5534/5869/7879/5993/56848/6772	32	2.59879
150	ME_blue	Organismal Systems	Endocrine system	hsa04916	Melanogenesis	21/808	101/8546	0.000407878	0.00358503	0.00253088	108/109/113/115/801/808/815/816/817/818/90993/5604/5594/23236/5566/5568/5579/5582/7306/7480/51384	21	2.59673
151	ME_blue	Cellular Processes	Transport and catabolism	hsa04140	Autophagy - animal	30/808	169/8546	0.000503119	0.0043022	0.00303716	9776/23130/115201/84971/79065/8678/10645/1508/1509/23710/64689/3708/643246/5604/5594/5602/5601/29982/10133/5291/5295/30849/5566/5568/5580/7879/29110/55823/27072/26100	30	2.51753
152	ME_blue	Cellular Processes	Cell growth and death	hsa04114	Oocyte meiosis	26/808	139/8546	0.000515233	0.0043022	0.00303716	108/109/113/115/801/808/815/816/817/818/898/64506/3708/5604/5594/5603/5526/5528/5530/5534/5566/5568/6196/6197/441272/7533	26	2.51753
153	ME_blue	Organismal Systems	Excretory system	hsa04966	Collecting duct acid secretion	9/808	28/8546	0.000763142	0.00621681	0.0043888	535/527/9114/155066/523/526/528/51382/529	9	2.35765
154	ME_blue	Human Diseases	Neurodegenerative disease	hsa05017	Spinocerebellar ataxia	26/808	144/8546	0.000896769	0.0070626	0.00498589	10939/9776/23130/488/6310/8678/2259/2891/2902/2903/3708/3748/3752/5602/5601/29982/5291/5295/30849/23236/5579/5582/5705/6712/7416/26100	26	2.30226
155	ME_blue	Organismal Systems	Endocrine system	hsa04922	Glucagon signaling pathway	21/808	107/8546	0.000909257	0.0070626	0.00498589	108/801/808/815/816/817/818/90993/3708/5160/5161/5213/5214/5223/23236/10891/5530/5534/5566/5568/51422	21	2.30226
156	ME_blue	Organismal Systems	Endocrine system	hsa04919	Thyroid hormone signaling pathway	23/808	122/8546	0.000948681	0.00720135	0.00508384	476/478/481/488/842/5604/5594/116931/5213/5214/5291/5295/23236/5566/5568/5579/5582/10231/6257/6548/6772/9882/7068	23	2.29381
157	ME_blue	Organismal Systems	Endocrine system	hsa04928	Parathyroid hormone synthesis, secretion and action	22/808	115/8546	0.000992103	0.00733435	0.00517773	108/109/113/115/9826/90993/1958/3708/5604/5594/4205/4209/5141/5143/23236/5566/5568/5579/5582/6257/50964/27347	22	2.28586
158	ME_blue	Organismal Systems	Endocrine system	hsa04926	Relaxin signaling pathway	24/808	130/8546	0.00101012	0.00733435	0.00517773	108/109/113/115/90993/2769/10681/2785/3640/5604/6416/5594/5602/5603/5601/4843/5291/5295/23236/5566/5568/5590/59350/51289	24	2.28586
159	ME_blue	Metabolism	Carbohydrate metabolism	hsa00562	Inositol phosphate metabolism	16/808	73/8546	0.00107018	0.00760509	0.00536887	10423/3612/27124/64768/3706/55361/5297/5288/5291/79837/8395/23396/23236/23007/22908/8867	16	2.27012
160	ME_blue	Environmental Information Processing	Signal transduction	hsa04014	Ras signaling pathway	37/808	238/8546	0.00161627	0.0112447	0.00793826	627/801/808/2002/2114/27006/10681/2785/2902/2903/283455/5604/5594/5602/5601/4233/5058/56924/5291/5295/8398/5566/5568/5579/5582/5869/5899/10928/9771/8437/5923/5924/10125/83593/23179/9610/29110	37	2.10027
161	ME_blue	Organismal Systems	Aging	hsa04211	Longevity regulating pathway	18/808	90/8546	0.00164967	0.0112447	0.00793826	108/109/113/115/9776/10645/90993/253314/5291/5295/5468/10891/5566/5568/51422/27244/83667/6648	18	2.10027
162	ME_blue	Human Diseases	Cardiovascular disease	hsa05414	Dilated cardiomyopathy	20/808	105/8546	0.00174779	0.0115811	0.00817576	108/109/113/115/488/55799/782/783/785/10369/10368/59283/5566/5568/6262/6445/137868/6543/6645/7139	20	2.08747
163	ME_blue	Organismal Systems	Nervous system	hsa04722	Neurotrophin signaling pathway	22/808	120/8546	0.00176837	0.0115811	0.00817576	396/627/801/808/815/816/817/818/3656/5604/5607/5594/5602/5603/5601/4145/5291/5295/5580/6196/6197/6272	22	2.08747
164	ME_blue	Organismal Systems	Digestive system	hsa04972	Pancreatic secretion	20/808	106/8546	0.00196815	0.0126416	0.00892441	108/109/113/115/476/478/481/488/490/492/493/1131/3708/3778/23236/5579/5582/5874/6262/6548	20	2.04942
165	ME_blue	Organismal Systems	Excretory system	hsa04962	Vasopressin-regulated water reabsorption	11/808	44/8546	0.00209564	0.0130989	0.00924727	109/115/396/90993/1639/140735/4905/5566/5568/5869/6844	11	2.03399
166	ME_blue	Cellular Processes	Transport and catabolism	hsa04136	Autophagy - other	9/808	32/8546	0.0021955	0.0130989	0.00924727	9776/23130/115201/84971/79065/8678/23710/30849/26100	9	2.03399
167	ME_blue	Environmental Information Processing	Signal transduction	hsa04071	Sphingolipid signaling pathway	22/808	122/8546	0.00219953	0.0130989	0.00924727	624/1509/8560/5604/5594/5602/5603/5601/4985/5291/5295/23236/5522/5526/5528/5579/5582/5590/130367/6609/56848/10558	22	2.03399
168	ME_blue	Organismal Systems	Endocrine system	hsa04935	Growth hormone synthesis, secretion and action	22/808	122/8546	0.00219953	0.0130989	0.00924727	108/109/113/115/90993/3708/5604/6416/5594/5602/5603/5601/112609/5291/5295/23236/5566/5568/5579/5582/6750/6772	22	2.03399
169	ME_blue	Human Diseases	Cancer: overview	hsa05230	Central carbon metabolism in cancer	15/808	71/8546	0.00223545	0.0130989	0.00924727	2744/27165/3098/5604/5594/4233/5160/5161/5213/5214/5223/5291/5295/5979/23410	15	2.03399
170	ME_blue	Environmental Information Processing	Signal transduction	hsa04012	ErbB signaling pathway	17/808	86/8546	0.00250245	0.0141664	0.0100009	815/816/817/818/2002/2066/5604/6416/5594/5602/5601/5058/56924/5291/5295/5579/5582	17	1.99996
171	ME_blue	Organismal Systems	Sensory system	hsa04742	Taste transduction	17/808	86/8546	0.00250245	0.0141664	0.0100009	255022/1131/2550/9568/2554/2555/2557/2558/3351/3354/3355/9177/9033/23236/5566/5568/6326	17	1.99996
172	ME_blue	Metabolism	Global and overview maps	hsa01200	Carbon metabolism	21/808	116/8546	0.00261099	0.0145345	0.0102607	55902/226/2026/2805/2806/2821/3098/3420/4190/10873/4967/55753/5160/5161/5213/5214/5223/283871/5634/6389/8803	21	1.98882
173	ME_blue	Human Diseases	Endocrine and metabolic disease	hsa04934	Cushing syndrome	26/808	155/8546	0.00267075	0.0146235	0.0103235	108/109/113/115/8911/815/816/817/818/898/90993/1394/3708/3739/3777/5604/5594/56246/57552/8622/23236/5566/5568/6770/7480/51384	26	1.98617
174	ME_blue	Human Diseases	Cancer: specific types	hsa05223	Non-small cell lung cancer	15/808	73/8546	0.0029745	0.0160239	0.0113122	842/3718/3798/3799/3800/5604/5594/4233/5291/5295/5579/5582/83593/5979/6257	15	1.94645
175	ME_blue	NA	NA	hsa04148	Efferocytosis	26/808	157/8546	0.00320129	0.0169719	0.0119814	8754/203859/488/815/816/817/818/961/6376/1849/9844/5604/5594/5603/8398/5468/5743/64284/5869/7879/140885/10326/56848/7301/55823/27072	26	1.92149
176	ME_blue	Organismal Systems	Circulatory system	hsa04270	Vascular smooth muscle contraction	23/808	134/8546	0.00340774	0.0177841	0.0125548	108/109/113/115/147/9826/801/808/3708/3778/27345/5604/5594/340156/4880/8398/23236/4660/5566/5568/5579/5580/5582	23	1.90119
177	ME_blue	Organismal Systems	Endocrine system	hsa04918	Thyroid hormone synthesis	15/808	75/8546	0.00390391	0.0200601	0.0141616	108/109/113/115/433/476/478/481/90993/3708/23236/5566/5568/5579/5582	15	1.84889
178	ME_blue	Human Diseases	Neurodegenerative disease	hsa05016	Huntington disease	44/808	311/8546	0.00407582	0.0204654	0.0144477	10120/160/1173/9776/23130/627/8678/842/1212/90993/1639/1742/2891/2893/2902/3708/3798/3799/3800/3831/64837/4294/5602/5601/4705/4719/4720/4723/29982/30849/23236/5468/10891/5705/6389/6647/6648/6804/6875/7277/51807/10382/7416/26100	44	1.8402
179	ME_blue	Organismal Systems	Immune system	hsa04625	C-type lectin receptor signaling pathway	19/808	105/8546	0.00410534	0.0204654	0.0144477	801/808/1540/1959/1960/3708/5594/5602/5603/5601/114548/5058/5291/5295/5530/5534/5580/5743/6772	19	1.8402
180	ME_blue	Human Diseases	Infectious disease: bacterial	hsa05135	Yersinia infection	23/808	138/8546	0.00496219	0.0243731	0.0172064	81873/10458/9844/3984/5604/6416/5594/5602/5603/5601/114548/5291/5295/8395/23396/2185/6196/6197/8935/29110/148022/8976/147179	23	1.76431
181	ME_blue	Cellular Processes	Cellular community - eukaryotes	hsa04540	Gap junction	17/808	92/8546	0.00518148	0.0250814	0.0177064	108/109/113/115/3356/3708/5604/5607/5594/23236/5566/5568/5579/5582/7277/51807/10382	17	1.75187
182	ME_blue	Human Diseases	Infectious disease: viral	hsa05161	Hepatitis B	26/808	163/8546	0.00535582	0.0254054	0.0179351	537/842/898/90993/1959/1960/2002/3716/3718/5604/6416/5594/5602/5603/5601/5291/5295/5579/5582/2185/6772/6775/6778/29110/148022/7187	26	1.7463
183	ME_blue	Organismal Systems	Endocrine system	hsa04915	Estrogen signaling pathway	23/808	139/8546	0.00543156	0.0254054	0.0179351	108/109/113/115/801/808/90993/1509/2550/9568/9687/3708/3760/3765/3884/5604/5594/5291/5295/23236/5566/5568/5580	23	1.7463
184	ME_blue	Metabolism	Carbohydrate metabolism	hsa00020	Citrate cycle (TCA cycle)	8/808	30/8546	0.00547661	0.0254054	0.0179351	3420/4190/4967/55753/5160/5161/6389/8803	8	1.7463
185	ME_blue	Environmental Information Processing	Signal transduction	hsa04066	HIF-1 signaling pathway	19/808	110/8546	0.00689743	0.0315581	0.0222786	226/815/816/817/818/253314/2026/3098/5604/5594/4843/5160/5161/5213/5214/5291/5295/5579/5582	19	1.65211
186	ME_blue	Human Diseases	Infectious disease: bacterial	hsa05132	Salmonella infection	36/808	251/8546	0.00716514	0.03234	0.0228306	10120/375/55207/81873/330/26999/1639/140735/6990/9844/9648/3798/3799/3800/3831/64837/4074/5604/6416/5594/5602/5603/5601/114548/5058/5288/5291/23207/5869/7879/7277/51807/10382/55823/27072/8976	36	1.64148
187	ME_blue	Organismal Systems	Excretory system	hsa04960	Aldosterone-regulated sodium reabsorption	9/808	38/8546	0.00763285	0.0339916	0.0239966	476/478/481/5594/4306/5291/5295/5579/5582	9	1.61985
188	ME_blue	Cellular Processes	Transport and catabolism	hsa04137	Mitophagy - animal	18/808	105/8546	0.00909239	0.0399587	0.0282091	267/79065/23786/8678/23770/23710/643246/5602/5601/9927/10133/192111/65018/5869/7879/79735/29110/7030	18	1.54961
189	ME_blue	Environmental Information Processing	Signal transduction	hsa04370	VEGF signaling pathway	12/808	60/8546	0.00935648	0.0405853	0.0286514	842/5604/5594/5603/5291/5295/5530/5534/5579/5582/5743/56848	12	1.54285
190	ME_blue	NA	NA	hsa01210	2-Oxocarboxylic acid metabolism	8/808	33/8546	0.0100862	0.0431895	0.0304899	51166/2805/2806/3420/4967/55753/5160/5161	8	1.51584
191	ME_blue	Human Diseases	Endocrine and metabolic disease	hsa04930	Type II diabetes mellitus	10/808	47/8546	0.0110424	0.0466858	0.0329581	6833/3098/3767/5594/5602/5601/5291/5295/5580/5590	10	1.48204
192	ME_yellow	Cellular Processes	Cell growth and death	hsa04110	Cell cycle	66/532	158/8546	7.91307e-39	2.43723e-36	2.13236e-36	9212/699/701/9184/890/891/9133/9134/991/8697/993/994/995/8318/990/8317/113130/983/1017/1019/1021/1027/1031/81620/1111/11200/10926/1869/1870/1871/1875/157570/9700/26271/10912/3066/4085/4171/4172/4173/4174/4175/4176/4193/27085/10403/4998/23594/5111/5347/9232/10744/5885/5925/5933/6502/4089/9126/10274/10735/7027/7029/7157/9319/7272/7465	66	35.6711
193	ME_yellow	Genetic Information Processing	Replication and repair	hsa03030	DNA replication	22/532	36/8546	3.25768e-18	5.01683e-16	4.38929e-16	1763/2237/4171/4172/4173/4174/4175/4176/5111/5422/23649/5424/10714/5427/5557/5558/5982/5983/5984/10535/79621/6117	22	15.3576
194	ME_yellow	Genetic Information Processing	Replication and repair	hsa03460	Fanconi anemia pathway	19/532	55/8546	3.05527e-10	3.13675e-08	2.74439e-08	641/672/675/83990/146956/2187/2177/2188/55215/57697/3280/4292/11201/5888/80010/116028/6117/29089/7398	19	7.56155
195	ME_yellow	Genetic Information Processing	Replication and repair	hsa03440	Homologous recombination	16/532	41/8546	9.79801e-10	7.54446e-08	6.60076e-08	580/641/672/675/83990/146956/5424/10714/5888/5890/25788/8438/5932/6117/7516/7517	16	7.18041
196	ME_yellow	Cellular Processes	Cell growth and death	hsa04218	Cellular senescence	30/532	157/8546	2.53295e-08	1.5603e-06	1.36513e-06	890/891/9133/9134/993/983/1017/1019/1021/1111/11200/1869/1870/1871/1875/2305/10912/91750/286826/4193/4605/4775/4776/5293/5501/5925/5928/5933/7046/7157	30	5.86483
197	ME_yellow	Genetic Information Processing	Replication and repair	hsa03430	Mismatch repair	11/532	23/8546	3.34723e-08	1.71824e-06	1.50332e-06	9156/4292/4436/2956/5111/5424/10714/5982/5983/5984/6117	11	5.82295
198	ME_yellow	Cellular Processes	Cell growth and death	hsa04115	p53 signaling pathway	17/532	75/8546	2.47141e-06	0.000108742	9.514e-05	891/9133/9134/983/1017/1019/1021/1111/11200/1643/10912/92344/51512/4193/8493/6241/7157	17	4.02164
199	ME_yellow	Human Diseases	Cancer: specific types	hsa05222	Small cell lung cancer	19/532	93/8546	3.37364e-06	0.000129885	0.000113638	9134/1017/1019/1021/1027/1163/1164/1288/1643/1869/1870/1871/10912/3673/284217/5293/5925/6502/7157	19	3.94447
200	ME_yellow	Genetic Information Processing	Replication and repair	hsa03410	Base excision repair	12/532	44/8546	1.0046e-05	0.000343796	0.000300792	328/2237/55247/142/5111/5424/10714/5427/5982/5983/5984/7374	12	3.52173
201	ME_yellow	Human Diseases	Cancer: specific types	hsa05224	Breast cancer	24/532	148/8546	1.28851e-05	0.000396862	0.00034722	672/675/1019/1021/1499/1643/28514/1869/1870/1871/1950/8321/2535/8325/10912/3280/23462/3725/4851/5293/5925/6667/83439/7157	24	3.4594
202	ME_yellow	Human Diseases	Infectious disease: viral	hsa05166	Human T-cell leukemia virus 1 infection	31/532	224/8546	2.06963e-05	0.000579497	0.00050701	701/9184/890/9133/9134/991/8697/1017/1019/1031/1111/11200/9586/1869/1870/1871/9700/3725/4085/4775/4776/5293/9232/10744/5902/5925/4089/6929/7046/7157/7514	31	3.29498
203	ME_yellow	Human Diseases	Cancer: specific types	hsa05212	Pancreatic cancer	15/532	77/8546	6.48111e-05	0.00153552	0.00134345	675/1019/1021/1643/1869/1870/1871/1950/10912/5293/5888/5925/4089/7046/7157	15	2.87178
204	ME_yellow	Human Diseases	Cancer: specific types	hsa05220	Chronic myeloid leukemia	15/532	77/8546	6.48111e-05	0.00153552	0.00134345	1019/1021/1027/1643/1869/1870/1871/10912/3066/4193/5293/5925/4089/7046/7157	15	2.87178
205	ME_yellow	Human Diseases	Cancer: specific types	hsa05215	Prostate cancer	17/532	98/8546	9.98488e-05	0.00219667	0.0019219	9134/1017/1027/9586/1499/1869/1870/1871/1950/7184/4193/80310/5293/5925/83439/7157/6935	17	2.71627
206	ME_yellow	Genetic Information Processing	Translation	hsa03013	Nucleocytoplasmic transport	18/532	108/8546	0.000107554	0.00220844	0.0019322	9775/51194/10526/3838/4116/22916/57122/55746/23279/23225/129401/79023/10762/53371/4927/9939/3842/7514	18	2.71395
207	ME_yellow	Human Diseases	Infectious disease: viral	hsa05169	Epstein-Barr virus infection	27/532	204/8546	0.0001517	0.00292023	0.00255495	890/9134/1017/1019/1021/1027/1643/1869/1870/1871/10912/3066/3280/3725/4193/4734/2923/5293/5708/5925/8819/79685/6502/22938/23118/7157/7431	27	2.59262
208	ME_yellow	Genetic Information Processing	Transcription	hsa03040	Spliceosome	28/532	217/8546	0.000178482	0.00323368	0.00282919	1665/9775/3178/220988/3183/3190/3192/4116/22916/84950/55119/9128/55660/55696/9939/27316/10946/9410/6628/22938/6426/10772/6427/6432/8683/29896/6434/10713	28	2.54834
209	ME_yellow	Human Diseases	Endocrine and metabolic disease	hsa04934	Cushing syndrome	22/532	155/8546	0.000225511	0.00385875	0.00337608	405/9134/1017/1019/1021/1027/1031/9586/1395/1499/1869/1870/1871/8321/2535/8325/2773/3949/5908/5925/6667/83439	22	2.47159
210	ME_yellow	Human Diseases	Cancer: specific types	hsa05218	Melanoma	13/532	73/8546	0.000496749	0.00805256	0.0070453	1019/1021/1643/1869/1870/1871/1950/10912/4193/80310/5293/5925/7157	13	2.1521
211	ME_yellow	Genetic Information Processing	Chromosome	hsa03083	Polycomb repressive complex	14/532	83/8546	0.00054308	0.00836343	0.00731728	9212/84733/1876/8726/2146/3066/84458/84108/26147/5928/5931/6322/23512/7027	14	2.13565
212	ME_yellow	Human Diseases	Cancer: specific types	hsa05210	Colorectal cancer	14/532	87/8546	0.000883081	0.0124181	0.0108648	332/1499/1643/1950/10912/3725/4292/4436/2956/5293/4089/83439/7046/7157	14	1.96398
213	ME_yellow	Human Diseases	Cancer: overview	hsa05203	Viral carcinogenesis	25/532	205/8546	0.000912151	0.0124181	0.0108648	890/9134/991/983/1017/1019/1021/1027/1111/9586/1642/2960/3066/9734/3190/3725/4193/5293/5902/5925/5933/6502/27044/22938/7157	25	1.96398
214	ME_yellow	Cellular Processes	Cell growth and death	hsa04114	Oocyte meiosis	19/532	139/8546	0.000949456	0.0124181	0.0108648	6790/699/891/9133/9134/991/8697/995/983/1017/9700/286151/26271/4085/5347/5501/9232/10744/9126	19	1.96398
215	ME_yellow	Human Diseases	Cancer: specific types	hsa05226	Gastric cancer	20/532	150/8546	0.000967645	0.0124181	0.0108648	9134/1017/1027/1499/1643/1869/1870/1871/1950/8321/2535/8325/10912/4292/5293/5925/4089/83439/7046/7157	20	1.96398
216	ME_yellow	Organismal Systems	Endocrine system	hsa04914	Progesterone-mediated oocyte maturation	16/532	111/8546	0.0013312	0.0164003	0.0143489	6790/699/890/891/9133/8697/993/994/995/983/1017/2773/3835/4085/5293/5347	16	1.84318
217	ME_yellow	Genetic Information Processing	Replication and repair	hsa03420	Nucleotide excision repair	11/532	63/8546	0.0015665	0.0178698	0.0156345	1642/1643/4331/5111/5424/10714/5427/5982/5983/5984/6117	11	1.80592
218	ME_yellow	Human Diseases	Cancer: specific types	hsa05217	Basal cell carcinoma	11/532	63/8546	0.0015665	0.0178698	0.0156345	1499/1643/8321/2535/8325/10912/2736/2737/6608/83439/7157	11	1.80592
219	ME_yellow	Environmental Information Processing	Signal transduction	hsa04390	Hippo signaling pathway	20/532	157/8546	0.00170636	0.01877	0.0164221	332/23418/286204/1499/8321/2535/8325/2736/8994/3996/55233/56288/5501/4089/6657/83439/7003/8463/7046/10413	20	1.78457
220	ME_yellow	Human Diseases	Cancer: specific types	hsa05225	Hepatocellular carcinoma	21/532	170/8546	0.00194881	0.0206977	0.0181087	86/29117/1019/1021/1499/1643/1869/1870/1871/8321/2535/8325/10912/5293/5925/4089/6599/6605/83439/7046/7157	21	1.74211
221	ME_yellow	Human Diseases	Cancer: specific types	hsa05214	Glioma	12/532	76/8546	0.00238695	0.0245061	0.0214407	1019/1021/1643/1869/1870/1871/1950/10912/4193/5293/5925/7157	12	1.66876
222	ME_yellow	Human Diseases	Infectious disease: viral	hsa05161	Hepatitis B	20/532	163/8546	0.00267741	0.0266014	0.0232739	332/890/9134/1017/9586/1642/1643/1869/1870/1871/3725/4775/4776/5111/5293/5925/4089/23118/7046/7157	20	1.63313
223	ME_yellow	Human Diseases	Drug resistance: antineoplastic	hsa01522	Endocrine resistance	14/532	99/8546	0.00312535	0.0300815	0.0263187	1019/1027/1031/28514/1869/1870/1871/3725/4193/4851/5293/5925/6667/7157	14	1.57974
224	ME_yellow	Human Diseases	Cancer: specific types	hsa05219	Bladder cancer	8/532	41/8546	0.00328909	0.0306982	0.0268583	1019/1869/1870/1871/1950/4193/5925/7157	8	1.57092
225	ME_yellow	Cellular Processes	Cellular community - eukaryotes	hsa04550	Signaling pathways regulating pluripotency of stem cells	18/532	144/8546	0.00350477	0.0317491	0.0277777	1499/1749/8321/2535/8325/3400/3625/4762/5013/5080/84108/5293/5460/5978/4089/4090/6657/6929	18	1.5563
226	ME_yellow	Genetic Information Processing	Translation	hsa03015	mRNA surveillance pathway	14/532	103/8546	0.00450631	0.0396555	0.0346952	10978/53981/51692/1477/1478/9775/4116/22916/132430/10914/56903/5501/9939/23435	14	1.45973
227	ME_yellow	Human Diseases	Cancer: specific types	hsa05223	Non-small cell lung cancer	11/532	73/8546	0.00516187	0.0441627	0.0386386	1019/1021/1643/1869/1870/1871/1950/10912/5293/5925/7157	11	1.41298
228	ME_green	Genetic Information Processing	Transcription	hsa03022	Basal transcription factors	11/419	44/8546	6.09981e-06	0.00124199	0.00121067	2957/2959/2961/2963/6882/6883/6873/6879/129685/6880/9519	11	2.91697
229	ME_green	Metabolism	Metabolism of terpenoids and polyketides	hsa00900	Terpenoid backbone biosynthesis	8/419	23/8546	7.98708e-06	0.00124199	0.00121067	38/39/2339/9453/3156/3157/23590/57107	8	2.91697
230	ME_green	Genetic Information Processing	Folding, sorting and degradation	hsa04120	Ubiquitin mediated proteolysis	19/419	142/8546	5.99689e-05	0.00621677	0.00606001	329/8454/8452/8450/1161/55120/26272/55958/9039/55236/7321/7322/7323/10477/7326/51465/92912/65264/7337	19	2.21753
231	ME_green	Genetic Information Processing	Folding, sorting and degradation	hsa04141	Protein processing in endoplasmic reticulum	20/419	171/8546	0.000254512	0.0197883	0.0192893	8454/79139/51009/51726/54788/3300/1965/3998/9373/5887/6048/6184/56681/6747/7991/7321/7322/7323/7326/51465	20	1.71468
232	ME_green	Genetic Information Processing	Transcription	hsa03040	Spliceosome	23/419	217/8546	0.000387196	0.0240836	0.0234763	988/51340/1655/23658/11157/55110/4686/84844/5356/10465/51645/8559/10285/11017/6629/6632/6635/6636/6637/6428/25949/51729/153527	23	1.62937
233	ME_green	Genetic Information Processing	Translation	hsa03015	mRNA surveillance pathway	14/419	103/8546	0.000470422	0.0243836	0.0237687	100529063/11052/23283/1479/2935/23708/55110/4686/11051/140886/64895/53918/5529/8732	14	1.62399
234	ME_green	Human Diseases	Neurodegenerative disease	hsa05017	Spinocerebellar ataxia	17/419	144/8546	0.000654243	0.0290671	0.0283341	25814/2776/2959/90550/5290/5682/5683/5685/5688/10213/9861/5713/23369/9519/9706/7417/7419	17	1.54769
235	ME_green	Human Diseases	Infectious disease: bacterial	hsa05132	Salmonella infection	24/419	251/8546	0.0012806	0.0497831	0.0485278	64746/10096/10109/10092/329/836/998/1434/51164/84516/1781/10640/3839/3840/5608/6885/5290/9842/51209/5898/257397/7846/81027/65082	24	1.31401
236	ME_grey60	Genetic Information Processing	Translation	hsa03013	Nucleocytoplasmic transport	6/49	108/8546	3.18643e-05	0.00232609	0.00224727	10482/5411/64901/10250/9984/65110	6	2.64834
237	ME_turquoise	Genetic Information Processing	Translation	hsa03013	Nucleocytoplasmic transport	38/691	108/8546	1.0874e-15	3.40358e-13	3.17064e-13	8086/22985/25909/22794/55308/11269/7919/2733/79711/55705/3837/9972/9631/23511/23165/8021/348995/23636/79902/9688/4928/9883/100101267/10284/6396/57187/8563/79228/30000/23534/7175/7329/5976/65109/64328/57510/23214/23039	38	12.4989
238	ME_turquoise	Genetic Information Processing	Chromosome	hsa03082	ATP-dependent chromatin remodeling	35/691	117/8546	3.53641e-12	5.53448e-10	5.15571e-10	60/71/79913/93973/8289/57492/196528/9031/11176/29994/605/2186/10902/65980/27443/1107/1108/5977/57634/80314/54815/57459/54617/54891/9219/4798/55193/51773/6597/6598/6601/6602/10847/8295/7528	35	9.28771
239	ME_turquoise	Genetic Information Processing	Chromosome	hsa03083	Polycomb repressive complex	27/691	83/8546	1.2877e-10	1.3435e-08	1.25155e-08	171023/80816/26053/54880/63035/57332/1387/10238/2033/221937/3607/3054/3720/22992/84678/55777/23269/22823/7703/10336/1912/80012/10389/51460/54881/7874/7528	27	7.90255
240	ME_turquoise	Organismal Systems	Development and regeneration	hsa04360	Axon guidance	37/691	184/8546	1.52324e-07	1.19194e-05	1.11036e-05	25/91653/1630/1948/2042/2047/2048/2534/3897/3985/9860/8440/4756/4917/84628/5062/84612/84552/8503/5335/5361/5362/55558/91584/23654/5894/6093/6405/54910/54437/6585/6714/57522/23380/9901/54434/85464	37	4.95453
241	ME_turquoise	Genetic Information Processing	Translation	hsa03015	mRNA surveillance pathway	24/691	103/8546	1.58447e-06	9.91879e-05	9.23997e-05	22985/22794/29894/642843/79869/26528/55308/11269/7919/2521/2733/4440/8761/51585/5519/5523/10284/23049/23293/9887/8189/5976/65109/55339	24	4.03433
242	ME_turquoise	Organismal Systems	Endocrine system	hsa04919	Thyroid hormone signaling pathway	22/691	122/8546	0.000271685	0.0127358	0.0118641	60/71/207/1387/2033/8841/3091/5469/9968/9969/9282/9440/9862/8202/9611/8503/113026/5335/5894/25942/6714/7249	22	1.92576
243	ME_turquoise	Genetic Information Processing	Transcription	hsa03040	Spliceosome	33/691	217/8546	0.000284825	0.0127358	0.0118641	22985/9716/56259/9416/7919/9879/8449/9785/1659/9343/2521/4670/5093/26121/10594/22827/6100/9092/10291/8175/23451/10992/23450/10262/23020/6626/6634/6429/57187/7307/199746/11338/23350	33	1.92576
244	ME_turquoise	Genetic Information Processing	Information processing in viruses	hsa03250	Viral life cycle - HIV-1	14/691	64/8546	0.000475683	0.0186111	0.0173374	27125/636/23299/904/905/128866/79869/1387/2033/4131/9972/256987/6598/23534	14	1.76102
245	ME_turquoise	Cellular Processes	Cellular community - eukaryotes	hsa04520	Adherens junction	17/691	93/8546	0.00111815	0.0381133	0.0355049	60/71/83605/1387/1459/1500/2033/2241/2534/3480/3643/5770/5792/6093/57154/64750/6714	17	1.44971
246	ME_turquoise	Genetic Information Processing	Replication and repair	hsa03460	Fanconi anemia pathway	12/691	55/8546	0.00121768	0.0381133	0.0355049	84126/2175/2176/2178/2189/79728/5429/51455/5980/7156/8940/57599	12	1.44971
