# Supplementary material for: Spatiotemporal Brain Transcriptomics Reveal Risk Gene Hot-Spots in Major Neuropsychiatric Disorders
Source: Research Square preprint supplement (doi:10.21203/rs.3.rs-7667905/v1), 2025-10-08
Supplement: Supplementary file 6 [file Supplemental Table 2. Data supporting Fig. 2b, Fig. S1a, Enrichment of 31 risk gene sets in Brainspan samples.xlsx]

## Sheet: r_rank_biserial
	IQ_GWAS_2018NatGen	IQ_GWAS_2018NatGen_ExNS	ASD_ES_2020Cell	ASD_ES_2020Cell_Predominant	ASD_ES_2020Cell_NDD	ASD_GWAS_2019_Nat_Genet	ASD_SFARI_1	TS_GWAS_2019AJP	Neuroticism_GWAS_2018NatGen	ADHD_GWAS_2019NatGen	ANO_GWAS_2019NatGen	PanicDisorder_GWAS_2019MP	BIP_GWAS_2019NatGen	BIP_GWAS_2021NatGen	MDD_GWAS_2019NatNeu	MDD_GWAS_2024NatGen	OCD_GWAS_2018MP	SZ_ES_2022Nature	SZ_GWAS_2018NatGen_CLZ	SZ_GWAS_2018NatGen_PGC	SZ_GWAS_2022Nature_Prio	SZ_GWAS_2022Nature_Ext	SZ_GWAS_2022Nature_Prot	SZ_GWAS_2022Nature_FM	Epilepsy_GWAS_2018NatCom	Epilepsy_Monogenic_2018NatCom	Epilepsy_GWAS_2018NatCom_prio	AD_GWAS_2021NatGen	AD_GWAS_2019NatGen	PD_GWAS_2019LancetNeu	PD_GWAS_2019LancetNeu_QTL
M_8pcw_Ocx	0.555153	0.479164	0.640755	0.62091	0.66146	0.403032	0.653739	0.438276	0.508407	0.582069	0.590812	0.534997	0.536157	0.446124	0.48768	0.427337	0.199641	0.528255	0.490926	0.555067	0.535769	0.403465	0.573153	0.48682	0.238143	0.593875	0.358388	0.27071	0.367605	0.515477	0.515485
M_8pcw_M1C.S1C	0.576652	0.510211	0.719463	0.700082	0.73949	0.409306	0.727968	0.448023	0.513125	0.582652	0.612629	0.57118	0.546667	0.461392	0.494138	0.434124	0.228109	0.586947	0.50984	0.566998	0.553899	0.427157	0.594106	0.505831	0.232059	0.613987	0.351802	0.271179	0.37395	0.53047	0.536134
M_8pcw_AMY	0.582629	0.506764	0.717169	0.687546	0.748579	0.382137	0.722469	0.423705	0.525006	0.64457	0.622938	0.643175	0.5483	0.455544	0.521328	0.452462	0.241325	0.581401	0.519514	0.577221	0.580889	0.436021	0.602444	0.550017	0.256549	0.642059	0.414857	0.265861	0.371708	0.533552	0.521682
M_8pcw_MGE	0.574057	0.485489	0.696705	0.67409	0.720371	0.369492	0.705934	0.424787	0.523591	0.610608	0.600785	0.640066	0.539549	0.463123	0.51439	0.446141	0.252957	0.56258	0.510705	0.563279	0.562703	0.42523	0.59146	0.509376	0.260177	0.607547	0.404044	0.264708	0.365318	0.52387	0.521212
M_8pcw_STC	0.581058	0.498631	0.735586	0.718786	0.752711	0.386781	0.738525	0.457186	0.52248	0.608839	0.60842	0.602418	0.546942	0.471928	0.521867	0.447059	0.257143	0.581717	0.520037	0.581943	0.580599	0.429722	0.601533	0.546531	0.255832	0.644907	0.391684	0.281467	0.386264	0.547707	0.540503
M_8pcw_URL	0.597264	0.518988	0.759147	0.739706	0.779157	0.409107	0.749741	0.454039	0.52928	0.685829	0.647278	0.57774	0.55282	0.455433	0.519421	0.457002	0.267083	0.592401	0.525188	0.591648	0.58138	0.429108	0.602969	0.549642	0.276507	0.638814	0.458199	0.29844	0.43626	0.546606	0.55113
M_8pcw_CGE	0.571254	0.482273	0.706069	0.688988	0.723568	0.370184	0.712378	0.438262	0.522086	0.604523	0.596572	0.618612	0.536458	0.457437	0.509683	0.444297	0.236823	0.561513	0.514074	0.572135	0.568205	0.422341	0.591316	0.520705	0.234402	0.599634	0.351465	0.266703	0.360341	0.516279	0.507218
M_8pcw_DTH	0.568228	0.485167	0.69971	0.672271	0.728729	0.398488	0.69261	0.431413	0.517359	0.635084	0.603416	0.553696	0.534518	0.449824	0.516834	0.438516	0.252243	0.553001	0.492566	0.548876	0.559401	0.416208	0.581109	0.504613	0.263221	0.592587	0.392577	0.262542	0.367902	0.528578	0.525711
M_8pcw_MFC	0.555114	0.467187	0.645803	0.637996	0.653125	0.387513	0.654782	0.443657	0.508895	0.567847	0.588704	0.57329	0.542307	0.451163	0.491482	0.429974	0.240294	0.50292	0.489607	0.552831	0.547459	0.41231	0.577578	0.495573	0.249734	0.58579	0.391156	0.28087	0.367977	0.519834	0.518681
M_8pcw_DFC	0.536245	0.444762	0.608047	0.61398	0.600183	0.386222	0.613401	0.423994	0.493914	0.572269	0.58468	0.548161	0.536044	0.44266	0.473231	0.417212	0.228059	0.484307	0.481813	0.544341	0.530651	0.398431	0.562125	0.467572	0.24342	0.559981	0.364377	0.274224	0.365167	0.499319	0.507339
M_8pcw_OFC	0.541399	0.463671	0.611238	0.611739	0.609402	0.369027	0.607309	0.428358	0.503008	0.600956	0.582025	0.591869	0.52486	0.450966	0.48863	0.428629	0.291849	0.473836	0.474371	0.539558	0.537727	0.407372	0.570956	0.488759	0.267147	0.574315	0.417951	0.294177	0.391335	0.523636	0.524608
M_8pcw_LGE	0.581698	0.496437	0.737932	0.712243	0.764927	0.384655	0.744058	0.445196	0.525434	0.630957	0.614223	0.635696	0.543503	0.46017	0.512972	0.453748	0.237642	0.576496	0.522163	0.577562	0.587541	0.434002	0.605858	0.549952	0.2544	0.63088	0.421258	0.267943	0.365639	0.528363	0.521575
M_8pcw_ITC	0.588078	0.516153	0.735141	0.715268	0.755681	0.408562	0.74237	0.446412	0.53042	0.637855	0.625272	0.629019	0.542209	0.466214	0.529818	0.456394	0.252549	0.604126	0.524231	0.587305	0.592874	0.437224	0.611398	0.56529	0.247881	0.658914	0.423346	0.268632	0.374347	0.54062	0.518951
M_8pcw_HIP	0.56162	0.484128	0.652923	0.637596	0.668584	0.389949	0.656834	0.434864	0.509556	0.613529	0.599989	0.543226	0.525881	0.443626	0.489592	0.441348	0.270263	0.501892	0.494852	0.557276	0.53628	0.411384	0.570492	0.478177	0.236795	0.587503	0.368613	0.281763	0.388928	0.524472	0.538238
M_8pcw_VFC	0.56588	0.489358	0.669722	0.659	0.680231	0.389781	0.676708	0.443532	0.516132	0.589736	0.59035	0.592521	0.535114	0.468662	0.504086	0.436226	0.233024	0.539335	0.504552	0.560156	0.552874	0.415674	0.582232	0.500534	0.257656	0.600802	0.389066	0.272633	0.366969	0.535541	0.53109
M_8pcw_PCx	0.569054	0.486761	0.710121	0.695295	0.725107	0.390663	0.716376	0.456217	0.513303	0.578771	0.600838	0.571531	0.549356	0.477933	0.49994	0.429908	0.249904	0.563516	0.51822	0.569136	0.556429	0.424947	0.589646	0.508501	0.240375	0.614658	0.360283	0.27168	0.38957	0.535495	0.539405
M_9pcw_DFC	0.576558	0.515175	0.737882	0.717028	0.759505	0.396975	0.744829	0.438922	0.506389	0.585445	0.626756	0.554848	0.540182	0.467723	0.488445	0.43487	0.225833	0.587125	0.524374	0.572198	0.56573	0.427608	0.592885	0.534024	0.217079	0.62348	0.33266	0.271393	0.368474	0.53349	0.538192
M_9pcw_MFC	0.582534	0.523248	0.735057	0.70845	0.763078	0.394684	0.74643	0.452315	0.513272	0.587998	0.641311	0.580196	0.548335	0.451704	0.498024	0.433983	0.229569	0.585784	0.522049	0.574179	0.574948	0.426683	0.602775	0.54791	0.235392	0.637902	0.366389	0.278385	0.380712	0.544156	0.540117
M_9pcw_AMY	0.582337	0.512908	0.745385	0.720005	0.772021	0.377643	0.754721	0.442116	0.527213	0.62297	0.619196	0.646658	0.538295	0.45761	0.528194	0.451184	0.247777	0.596362	0.522121	0.573179	0.599059	0.447288	0.611451	0.572776	0.247916	0.660834	0.413972	0.256216	0.355628	0.551174	0.542141
M_9pcw_DTH	0.59437	0.518011	0.757262	0.711462	0.806562	0.42075	0.754383	0.433199	0.529544	0.696138	0.624581	0.523712	0.531566	0.455938	0.524816	0.450091	0.275136	0.601287	0.51522	0.568806	0.588768	0.434954	0.609514	0.556925	0.254177	0.653816	0.404705	0.27072	0.386059	0.565224	0.551955
M_9pcw_URL	0.602539	0.533034	0.790064	0.763015	0.818462	0.440275	0.777724	0.445436	0.531021	0.694926	0.649484	0.573175	0.547591	0.454649	0.538751	0.461589	0.287938	0.620429	0.523552	0.592265	0.585276	0.435819	0.611108	0.558764	0.27686	0.671397	0.456349	0.300457	0.430302	0.586964	0.585038
M_9pcw_LGE	0.582502	0.512467	0.743205	0.713319	0.774852	0.348889	0.749467	0.431062	0.517887	0.627719	0.63831	0.613345	0.534319	0.458214	0.510337	0.443471	0.216351	0.571796	0.524128	0.572628	0.578879	0.439244	0.607054	0.542481	0.218012	0.639595	0.337766	0.254293	0.342947	0.521972	0.515145
M_9pcw_M1C.S1C	0.573226	0.50515	0.721399	0.695421	0.74875	0.378053	0.730945	0.442498	0.50652	0.586066	0.634484	0.527195	0.537052	0.449386	0.48302	0.430948	0.224716	0.561145	0.514521	0.567009	0.556699	0.419359	0.587122	0.515688	0.201751	0.615875	0.302327	0.266037	0.362889	0.513098	0.520784
M_9pcw_MGE	0.592188	0.532998	0.757102	0.725993	0.790079	0.405386	0.76703	0.439039	0.533183	0.620117	0.640027	0.624528	0.541472	0.460538	0.533597	0.457958	0.251087	0.585432	0.532859	0.579103	0.595864	0.433809	0.612415	0.560507	0.236879	0.659674	0.389824	0.2557	0.358437	0.5509	0.533367
M_9pcw_TCx	0.589851	0.514143	0.770626	0.745762	0.796637	0.401144	0.775348	0.452101	0.525033	0.593234	0.614834	0.547967	0.531861	0.458462	0.521934	0.441706	0.235829	0.61381	0.520428	0.577506	0.589974	0.428632	0.600295	0.564382	0.229722	0.65088	0.362996	0.275217	0.373594	0.54852	0.542657
M_9pcw_HIP	0.580911	0.523065	0.735235	0.713946	0.757347	0.418213	0.7418	0.446133	0.519384	0.610712	0.627841	0.525107	0.53922	0.454514	0.506714	0.442882	0.24735	0.578031	0.510631	0.569851	0.583165	0.435967	0.598944	0.553379	0.237653	0.647706	0.353137	0.289254	0.389933	0.54963	0.550368
M_9pcw_Ocx	0.583884	0.515336	0.750664	0.718647	0.784664	0.390365	0.757367	0.452052	0.523063	0.590075	0.613252	0.538286	0.53822	0.459741	0.507566	0.43722	0.240116	0.589674	0.522001	0.576835	0.567527	0.425184	0.597592	0.527093	0.227831	0.642423	0.337148	0.277823	0.380845	0.536573	0.537753
M_9pcw_CGE	0.573334	0.495506	0.708679	0.682753	0.735999	0.369308	0.718997	0.428554	0.52231	0.593149	0.607367	0.618989	0.533982	0.451941	0.511659	0.443306	0.261978	0.557125	0.513685	0.565807	0.563017	0.422052	0.590205	0.51708	0.227666	0.615329	0.349151	0.256603	0.365589	0.527658	0.525199
M_9pcw_OFC	0.580262	0.513857	0.739351	0.712746	0.767362	0.4186	0.74857	0.450181	0.519958	0.595058	0.629202	0.558853	0.546621	0.456295	0.488863	0.431008	0.232699	0.5824	0.524788	0.575585	0.563965	0.432445	0.60186	0.528052	0.242636	0.646703	0.382972	0.290134	0.39948	0.53982	0.54353
M_9pcw_PCx	0.587443	0.523539	0.762353	0.739578	0.78606	0.395794	0.765414	0.447137	0.518334	0.595053	0.614571	0.557402	0.545706	0.467214	0.514068	0.439033	0.250383	0.599996	0.51891	0.577306	0.581134	0.430301	0.602439	0.553216	0.237422	0.651841	0.368383	0.274024	0.378018	0.543797	0.541681
F_12pcw_HIP	0.572868	0.514968	0.692942	0.684258	0.701138	0.385746	0.70051	0.431313	0.50182	0.621622	0.626539	0.580044	0.537578	0.451257	0.491197	0.441701	0.252176	0.57064	0.508047	0.566233	0.577234	0.429113	0.597374	0.535812	0.2585	0.639744	0.419237	0.273052	0.386969	0.542149	0.541017
F_12pcw_DTH	0.597576	0.536708	0.762526	0.724714	0.802939	0.426361	0.759268	0.421193	0.516648	0.684653	0.64734	0.612065	0.556564	0.462538	0.50304	0.450917	0.228985	0.596132	0.54802	0.598589	0.596264	0.449648	0.62254	0.576865	0.256045	0.664977	0.431408	0.279069	0.399077	0.524166	0.514831
F_12pcw_AMY	0.576319	0.500621	0.717941	0.704025	0.731898	0.366227	0.720342	0.43172	0.518102	0.615805	0.616375	0.619011	0.537326	0.460631	0.507558	0.450414	0.247626	0.570819	0.526846	0.58031	0.57826	0.436533	0.604305	0.540746	0.236502	0.641476	0.39086	0.260052	0.374389	0.528697	0.524411
F_12pcw_A1C	0.603552	0.534955	0.769426	0.75823	0.780253	0.464522	0.767006	0.451677	0.510567	0.666517	0.644325	0.56011	0.543643	0.436596	0.488235	0.439023	0.228422	0.619874	0.536998	0.591746	0.586489	0.43874	0.607374	0.565117	0.26617	0.673173	0.446763	0.272418	0.379581	0.538751	0.52851
F_12pcw_V1C	0.594435	0.53773	0.754176	0.75325	0.753627	0.462872	0.754148	0.452646	0.504537	0.628695	0.651052	0.541569	0.538635	0.434258	0.485097	0.43902	0.25246	0.567088	0.526364	0.584824	0.571466	0.433372	0.606329	0.538408	0.260173	0.655834	0.444269	0.292158	0.404854	0.539241	0.540257
F_12pcw_MFC	0.596852	0.532665	0.774956	0.765754	0.783556	0.496846	0.775095	0.478177	0.509836	0.62249	0.633798	0.531934	0.54155	0.441973	0.489757	0.439082	0.24874	0.616158	0.528651	0.583706	0.576126	0.446921	0.611418	0.547043	0.256017	0.674125	0.443457	0.283623	0.380756	0.566469	0.557732
F_12pcw_STR	0.577269	0.482127	0.71328	0.688423	0.739402	0.432615	0.705544	0.429195	0.515754	0.673547	0.593579	0.608401	0.508943	0.440538	0.530137	0.4483	0.294903	0.578333	0.501237	0.560363	0.608603	0.44012	0.600019	0.577794	0.26871	0.651725	0.444184	0.258366	0.360203	0.556419	0.552925
F_12pcw_M1C	0.601804	0.532615	0.773236	0.760009	0.786312	0.469305	0.772871	0.45053	0.513578	0.646952	0.634328	0.5371	0.541094	0.457327	0.491008	0.435166	0.265518	0.609705	0.535284	0.591373	0.571002	0.436441	0.609709	0.540212	0.270112	0.676164	0.442308	0.279929	0.383614	0.552712	0.545073
F_12pcw_DFC	0.603502	0.532589	0.782165	0.771099	0.792821	0.465092	0.778262	0.460625	0.514954	0.61965	0.629876	0.540594	0.534481	0.456911	0.499288	0.444161	0.286316	0.630024	0.538704	0.587161	0.578191	0.438311	0.611522	0.548885	0.260816	0.68125	0.449549	0.278875	0.381517	0.569352	0.56493
F_12pcw_ITC	0.594776	0.518355	0.754562	0.733163	0.776757	0.457353	0.755883	0.446243	0.512616	0.636245	0.622388	0.589038	0.533642	0.447486	0.501699	0.441093	0.262649	0.609519	0.528295	0.586963	0.595458	0.435027	0.605779	0.568161	0.255833	0.670749	0.422538	0.275403	0.3836	0.554731	0.542928
F_12pcw_VFC	0.605487	0.543937	0.774182	0.763635	0.784279	0.46265	0.773306	0.456087	0.50432	0.625516	0.63993	0.547611	0.538573	0.450523	0.496163	0.438957	0.270078	0.594929	0.536302	0.588371	0.573923	0.436667	0.608435	0.542637	0.272315	0.671449	0.431512	0.275161	0.37814	0.55831	0.56481
F_12pcw_STC	0.603101	0.542443	0.777503	0.769077	0.785238	0.449051	0.774969	0.463362	0.510857	0.666056	0.646716	0.54669	0.546046	0.443267	0.489908	0.43532	0.271316	0.610514	0.53628	0.591826	0.578377	0.437689	0.606976	0.555083	0.257019	0.675488	0.428838	0.270339	0.392428	0.541411	0.526776
F_12pcw_IPC	0.606444	0.540321	0.778116	0.770123	0.785368	0.458793	0.773117	0.455987	0.502213	0.663131	0.635973	0.532301	0.535701	0.433197	0.486095	0.434139	0.248002	0.587568	0.524352	0.583839	0.577176	0.436443	0.606803	0.55093	0.266878	0.670443	0.444315	0.272966	0.374114	0.549974	0.547356
F_12pcw_OFC	0.597897	0.528036	0.758436	0.747821	0.768642	0.460393	0.762112	0.449455	0.513096	0.620789	0.624153	0.555226	0.545412	0.448894	0.497836	0.43848	0.263649	0.611824	0.529605	0.583317	0.573712	0.434578	0.604241	0.539435	0.264082	0.663177	0.422307	0.279341	0.371865	0.553633	0.543014
F_12pcw_S1C	0.595894	0.534014	0.767721	0.762194	0.772253	0.481389	0.763619	0.440754	0.499639	0.645556	0.641358	0.531177	0.527631	0.437682	0.472752	0.433379	0.234052	0.60295	0.529798	0.581187	0.569892	0.434362	0.601308	0.536775	0.257606	0.66756	0.43123	0.263369	0.364602	0.552729	0.545691
F_12pcw_STC.1	0.594884	0.509146	0.747443	0.737534	0.756888	0.456504	0.749028	0.446411	0.502972	0.658303	0.612532	0.541514	0.523811	0.448196	0.484272	0.432987	0.215673	0.601049	0.523614	0.581575	0.585766	0.433911	0.600195	0.563991	0.259221	0.667123	0.434622	0.269802	0.375042	0.548667	0.541087
F_12pcw_V1C.1	0.591435	0.519018	0.765988	0.76528	0.765171	0.441413	0.765249	0.465002	0.512035	0.626459	0.62297	0.527927	0.542876	0.453707	0.489013	0.437526	0.232595	0.596881	0.53325	0.586599	0.576631	0.442359	0.609248	0.548435	0.257571	0.668237	0.413303	0.280884	0.377648	0.546779	0.550373
F_12pcw_A1C.1	0.586362	0.512174	0.75509	0.742294	0.767725	0.461742	0.75876	0.462931	0.492041	0.660186	0.599603	0.529885	0.503781	0.42269	0.478417	0.431648	0.230396	0.593206	0.510155	0.55513	0.593794	0.435846	0.598946	0.574857	0.25847	0.667197	0.448282	0.255102	0.334343	0.558252	0.534851
F_12pcw_CB	0.600304	0.527996	0.78616	0.751861	0.822619	0.445612	0.770381	0.453191	0.513029	0.706402	0.625513	0.569897	0.526482	0.429748	0.52862	0.460369	0.30645	0.602065	0.517929	0.584054	0.604686	0.441016	0.609251	0.580479	0.270705	0.671035	0.445266	0.266043	0.370851	0.599508	0.590602
F_12pcw_ITC.1	0.59924	0.512908	0.764973	0.748517	0.781653	0.451619	0.765998	0.459419	0.512695	0.65332	0.600237	0.571684	0.525058	0.439502	0.497637	0.43698	0.239789	0.61124	0.519842	0.581628	0.592981	0.437638	0.610819	0.574644	0.268359	0.672886	0.424758	0.271397	0.375047	0.558906	0.555611
F_12pcw_IPC.1	0.589811	0.506816	0.756683	0.753907	0.758184	0.462201	0.757452	0.449448	0.500808	0.660803	0.609914	0.546634	0.527341	0.443365	0.487834	0.432445	0.230246	0.581389	0.521287	0.583453	0.58496	0.438791	0.606112	0.562253	0.267657	0.672482	0.460777	0.260936	0.350914	0.551629	0.541161
F_12pcw_S1C.1	0.589431	0.523762	0.743398	0.73602	0.750039	0.457441	0.747264	0.448744	0.498579	0.63513	0.616307	0.538208	0.532036	0.438159	0.473124	0.426786	0.219531	0.601142	0.514983	0.577284	0.576094	0.434781	0.594641	0.545125	0.261148	0.652403	0.411241	0.255556	0.339346	0.54882	0.543221
F_12pcw_DTH.1	0.589623	0.499476	0.745143	0.70885	0.783905	0.44339	0.737225	0.430299	0.502814	0.709311	0.613152	0.520765	0.524939	0.436815	0.506631	0.447493	0.274432	0.567303	0.496495	0.558334	0.599562	0.430427	0.600175	0.570702	0.275824	0.670822	0.432671	0.256703	0.374634	0.570284	0.561825
F_12pcw_HIP.1	0.580446	0.500524	0.710122	0.693656	0.726929	0.410678	0.72412	0.437682	0.5091	0.625274	0.60291	0.603383	0.527039	0.43255	0.492611	0.442625	0.21932	0.580293	0.508019	0.573263	0.596803	0.434573	0.601237	0.569781	0.243054	0.655741	0.410036	0.272769	0.371518	0.552797	0.551917
F_12pcw_DFC.1	0.589793	0.526212	0.745765	0.733707	0.757599	0.460745	0.746944	0.459318	0.495723	0.640188	0.598786	0.546964	0.518383	0.428937	0.486916	0.430878	0.258082	0.614726	0.507664	0.566557	0.589738	0.433511	0.59393	0.562283	0.256227	0.650504	0.434386	0.251734	0.330695	0.552843	0.530144
F_12pcw_OFC.1	0.573676	0.495985	0.721296	0.717217	0.724318	0.445258	0.723807	0.444795	0.488996	0.581998	0.590901	0.543006	0.510851	0.415828	0.488861	0.436733	0.25325	0.582391	0.505144	0.560496	0.577694	0.431178	0.593697	0.539436	0.248269	0.650792	0.399013	0.253027	0.316814	0.544153	0.520745
F_12pcw_M1C.1	0.599243	0.542883	0.772054	0.76322	0.780253	0.463295	0.776598	0.443314	0.504901	0.641743	0.632931	0.529842	0.541075	0.452329	0.480402	0.425659	0.237794	0.615634	0.531282	0.589298	0.576315	0.440141	0.610113	0.55014	0.255853	0.674266	0.408228	0.262599	0.35924	0.552775	0.55174
F_12pcw_VFC.1	0.586496	0.495806	0.725802	0.717971	0.732983	0.45954	0.730711	0.452914	0.489764	0.627111	0.608795	0.53859	0.520883	0.4241	0.467378	0.431201	0.238795	0.575637	0.514331	0.574088	0.573359	0.433631	0.600221	0.540265	0.264881	0.653032	0.42105	0.264193	0.350313	0.559282	0.540563
F_12pcw_AMY.1	0.593448	0.525496	0.747019	0.724006	0.771021	0.389011	0.751046	0.453986	0.526936	0.658864	0.628524	0.628621	0.540719	0.454801	0.532743	0.455408	0.27188	0.595435	0.540688	0.593804	0.617839	0.464341	0.625815	0.604725	0.263651	0.676693	0.444753	0.271036	0.393289	0.568202	0.553082
F_12pcw_STR.1	0.579026	0.510897	0.697438	0.655401	0.74268	0.396585	0.700092	0.424707	0.512971	0.666241	0.606012	0.598696	0.532365	0.440745	0.509836	0.447148	0.266138	0.574526	0.509859	0.563994	0.592421	0.438331	0.603312	0.559452	0.233222	0.639884	0.387302	0.262488	0.363089	0.52823	0.504506
F_12pcw_AMY.2	0.584664	0.505682	0.724072	0.705356	0.74335	0.382602	0.732801	0.440658	0.52206	0.644902	0.599139	0.63195	0.538706	0.459995	0.532433	0.458241	0.272472	0.590448	0.526042	0.584468	0.613347	0.455202	0.616138	0.588917	0.261894	0.667703	0.451331	0.25825	0.362843	0.562063	0.547136
F_12pcw_M1C.2	0.589512	0.50902	0.740456	0.733849	0.746246	0.467848	0.745648	0.436048	0.487695	0.645708	0.603412	0.52216	0.510283	0.412252	0.481405	0.426101	0.225338	0.576746	0.506451	0.569417	0.574424	0.426146	0.594363	0.536152	0.260038	0.642097	0.413267	0.252634	0.33259	0.539229	0.533792
F_12pcw_ITC.2	0.581913	0.495974	0.716063	0.715856	0.714795	0.441277	0.715521	0.463515	0.496338	0.647521	0.595264	0.543328	0.519317	0.422521	0.488205	0.429728	0.234704	0.57184	0.510701	0.572639	0.581319	0.422906	0.593816	0.54617	0.253085	0.640715	0.422106	0.257988	0.364033	0.547109	0.529166
F_12pcw_VFC.2	0.586308	0.50296	0.704727	0.700938	0.70746	0.449698	0.712071	0.430496	0.493403	0.633977	0.621885	0.57115	0.514182	0.431825	0.492542	0.425276	0.256988	0.576202	0.502169	0.566752	0.573143	0.422003	0.589825	0.53242	0.258696	0.629633	0.401347	0.254884	0.348985	0.544099	0.535001
F_12pcw_STR.2	0.59191	0.509545	0.76272	0.727389	0.800375	0.441751	0.760362	0.426923	0.517743	0.68214	0.611155	0.615036	0.545349	0.456784	0.520206	0.45323	0.246001	0.617925	0.538606	0.594809	0.606445	0.450296	0.624427	0.582301	0.259973	0.666426	0.450387	0.275555	0.37983	0.541818	0.527833
F_12pcw_CBC	0.580917	0.49341	0.730616	0.704318	0.758302	0.436834	0.714022	0.443199	0.513847	0.701803	0.60616	0.567071	0.530033	0.432656	0.529295	0.448573	0.289255	0.577764	0.509107	0.578351	0.587404	0.433122	0.598157	0.548645	0.263945	0.631962	0.449748	0.271125	0.378172	0.558619	0.554236
F_12pcw_DTH.2	0.579472	0.486096	0.708143	0.688284	0.728724	0.446691	0.698767	0.41763	0.504163	0.69751	0.599725	0.576669	0.526561	0.419982	0.508828	0.453281	0.266667	0.54076	0.505565	0.563997	0.592002	0.431578	0.600479	0.554822	0.273842	0.656193	0.456752	0.268258	0.367606	0.561694	0.554418
F_12pcw_DFC.2	0.585547	0.507065	0.739841	0.737733	0.740634	0.464843	0.743974	0.429005	0.501791	0.614743	0.607154	0.543529	0.522181	0.443437	0.49548	0.431791	0.208948	0.60188	0.510148	0.574314	0.567913	0.42923	0.592081	0.523909	0.250574	0.644383	0.403934	0.249742	0.324815	0.540874	0.526803
F_12pcw_OFC.2	0.595214	0.521096	0.753954	0.746649	0.760492	0.458099	0.759319	0.442935	0.505927	0.615664	0.605829	0.535325	0.530947	0.444851	0.501822	0.433589	0.239338	0.616488	0.520003	0.573712	0.58216	0.434289	0.599272	0.549157	0.253931	0.648338	0.40208	0.253441	0.31934	0.553695	0.528169
F_12pcw_S1C.2	0.590482	0.510874	0.735119	0.729519	0.739802	0.45773	0.740286	0.451228	0.500192	0.664276	0.613886	0.528619	0.519183	0.431174	0.480467	0.42532	0.22835	0.594305	0.514423	0.569489	0.577443	0.429404	0.596859	0.543988	0.260853	0.639695	0.426883	0.250549	0.341669	0.538816	0.527926
F_12pcw_V1C.2	0.59137	0.518445	0.76835	0.770821	0.763997	0.468656	0.765968	0.451723	0.507389	0.630479	0.623919	0.538284	0.536923	0.461922	0.493327	0.436573	0.254179	0.617126	0.516307	0.583251	0.574486	0.432132	0.598928	0.537305	0.243535	0.656287	0.406706	0.270172	0.361741	0.553838	0.540648
F_12pcw_MFC.1	0.596015	0.520383	0.771093	0.768804	0.772023	0.499028	0.770368	0.443821	0.507321	0.617624	0.617884	0.533573	0.526601	0.444582	0.491004	0.437917	0.255681	0.620548	0.526131	0.581396	0.570661	0.43368	0.602277	0.530797	0.257594	0.664455	0.43219	0.258646	0.354195	0.552222	0.543822
F_12pcw_HIP.2	0.586792	0.512565	0.744014	0.732996	0.754697	0.433351	0.748614	0.43748	0.519969	0.612104	0.620005	0.570604	0.532351	0.45244	0.507747	0.447073	0.264175	0.61265	0.521237	0.581626	0.586005	0.441079	0.604753	0.549388	0.249957	0.660452	0.413104	0.277311	0.379847	0.545863	0.534807
F_12pcw_IPC.2	0.571161	0.481563	0.695374	0.696113	0.693096	0.450911	0.698498	0.447315	0.478352	0.656089	0.592906	0.536279	0.50409	0.417483	0.475259	0.422895	0.216626	0.538438	0.49201	0.558975	0.566973	0.42338	0.585374	0.536892	0.250588	0.616779	0.433998	0.250447	0.332896	0.529591	0.50842
F_12pcw_A1C.2	0.593461	0.501486	0.759141	0.751253	0.766315	0.446422	0.758899	0.450478	0.499879	0.651439	0.608328	0.540012	0.524069	0.430347	0.488253	0.435953	0.254003	0.617353	0.524026	0.573449	0.588359	0.429539	0.594137	0.557059	0.268046	0.650835	0.443858	0.250763	0.33167	0.547189	0.51791
M_13pcw_STR	0.594541	0.516669	0.782907	0.742709	0.825928	0.451009	0.776542	0.434083	0.511933	0.690678	0.620079	0.618284	0.545549	0.459567	0.50968	0.453905	0.270228	0.610053	0.54414	0.591102	0.604889	0.455972	0.626522	0.585605	0.250163	0.677288	0.419608	0.282303	0.400808	0.541771	0.541431
M_13pcw_M1C	0.602461	0.533601	0.781865	0.769258	0.794235	0.467363	0.779757	0.451241	0.505407	0.672294	0.619556	0.554179	0.530809	0.440755	0.484429	0.438244	0.23005	0.623304	0.527982	0.585145	0.596538	0.445861	0.609518	0.571921	0.254777	0.66979	0.431409	0.252386	0.354672	0.533565	0.523649
M_13pcw_AMY	0.599659	0.532021	0.777938	0.757753	0.798734	0.446452	0.781198	0.460628	0.511742	0.645492	0.614066	0.571927	0.535908	0.443816	0.495558	0.447856	0.259422	0.593698	0.544464	0.598757	0.587345	0.448112	0.621521	0.552792	0.241979	0.6835	0.401108	0.266507	0.361802	0.53771	0.532786
M_13pcw_S1C	0.601422	0.520072	0.776308	0.763333	0.789098	0.470009	0.775798	0.449758	0.494601	0.673807	0.625446	0.537049	0.531019	0.442171	0.475935	0.42754	0.231399	0.600237	0.526002	0.586996	0.59349	0.441614	0.609583	0.571572	0.253563	0.668388	0.437699	0.253363	0.350421	0.532755	0.517295
M_13pcw_V1C	0.597719	0.547863	0.782833	0.776357	0.788389	0.459304	0.777432	0.450123	0.504531	0.645796	0.64023	0.527974	0.541563	0.455695	0.475556	0.437792	0.250779	0.618722	0.538063	0.589024	0.583025	0.442811	0.60611	0.557554	0.243756	0.667606	0.419865	0.269894	0.365791	0.536476	0.534339
M_13pcw_A1C	0.587201	0.500267	0.742535	0.73461	0.749785	0.44942	0.746698	0.44559	0.505529	0.644889	0.608464	0.574654	0.520369	0.447386	0.505398	0.441378	0.255576	0.601462	0.524843	0.580588	0.59605	0.430983	0.602067	0.55923	0.236277	0.650702	0.390737	0.255808	0.34976	0.539518	0.52375
M_13pcw_HIP	0.579736	0.502339	0.718939	0.707068	0.730622	0.444891	0.724753	0.443923	0.506397	0.639281	0.616572	0.575588	0.526998	0.445718	0.499687	0.44729	0.26869	0.601725	0.527508	0.579272	0.585502	0.435441	0.60738	0.551855	0.25978	0.668817	0.419949	0.270908	0.380589	0.537109	0.540934
M_13pcw_VFC	0.603396	0.53704	0.774942	0.763388	0.786156	0.475289	0.774889	0.451579	0.500575	0.662724	0.61892	0.556906	0.541304	0.441402	0.470075	0.436611	0.26424	0.618038	0.52915	0.591133	0.598635	0.439433	0.611131	0.579392	0.257027	0.666381	0.411378	0.256994	0.35222	0.534715	0.522513
M_13pcw_MFC	0.59439	0.516525	0.75235	0.74317	0.760974	0.480438	0.758803	0.447405	0.493741	0.633474	0.610059	0.563642	0.528679	0.432325	0.488095	0.437979	0.270105	0.585137	0.52154	0.575606	0.585322	0.436258	0.603488	0.554331	0.264929	0.656835	0.411487	0.248987	0.322525	0.538259	0.536315
M_13pcw_STC	0.606952	0.539368	0.788739	0.779013	0.797893	0.461921	0.784214	0.459187	0.521683	0.663677	0.642292	0.544446	0.541907	0.471199	0.503436	0.452349	0.269021	0.635344	0.537584	0.593277	0.600588	0.45048	0.622479	0.580554	0.25785	0.674403	0.459876	0.267521	0.377708	0.553948	0.53803
M_13pcw_OFC	0.590308	0.516382	0.746633	0.736205	0.756655	0.446685	0.751057	0.439293	0.507791	0.634607	0.610204	0.590771	0.53004	0.445657	0.506255	0.44426	0.269037	0.596115	0.528321	0.585604	0.589257	0.428349	0.60411	0.556564	0.250522	0.661	0.390587	0.251775	0.337043	0.548473	0.531431
M_13pcw_IPC	0.601282	0.530259	0.789028	0.780803	0.796514	0.46427	0.783782	0.471421	0.5008	0.660712	0.625164	0.534457	0.53423	0.434787	0.478785	0.436407	0.251692	0.621846	0.530699	0.586517	0.590375	0.448638	0.611503	0.564684	0.249845	0.670428	0.429836	0.256593	0.363265	0.538015	0.529424
M_13pcw_DFC	0.600372	0.519709	0.763613	0.748388	0.77893	0.494898	0.767668	0.46185	0.498339	0.65225	0.609912	0.558834	0.535741	0.441591	0.486457	0.438884	0.229512	0.609513	0.531123	0.587557	0.591257	0.437701	0.606933	0.563379	0.250909	0.663876	0.407089	0.247763	0.346125	0.527004	0.523785
M_13pcw_ITC	0.600095	0.536796	0.77356	0.760806	0.78611	0.454402	0.775161	0.447049	0.518474	0.649668	0.635215	0.551893	0.550521	0.463064	0.489866	0.450058	0.228128	0.610182	0.541304	0.597148	0.583858	0.444297	0.615988	0.552246	0.246615	0.679037	0.398572	0.267468	0.343115	0.533726	0.536458
F_13pcw_STR	0.591283	0.538629	0.75733	0.723144	0.793725	0.406129	0.758282	0.427851	0.529435	0.664792	0.658618	0.607464	0.565469	0.481361	0.510951	0.452965	0.237563	0.584918	0.545706	0.600401	0.593253	0.445269	0.622211	0.575953	0.250305	0.669273	0.392305	0.28587	0.412175	0.534372	0.527559
F_13pcw_S1C	0.604144	0.551241	0.766736	0.758062	0.774768	0.48735	0.771364	0.457731	0.508168	0.653642	0.663428	0.532883	0.54879	0.448687	0.478422	0.435157	0.226621	0.606785	0.534555	0.587285	0.568977	0.431794	0.603456	0.547872	0.259489	0.666287	0.415861	0.272495	0.376634	0.545011	0.54381
F_13pcw_V1C	0.596567	0.536912	0.760631	0.760092	0.759638	0.449627	0.763892	0.452569	0.519676	0.636069	0.665063	0.531442	0.554266	0.459558	0.489314	0.446803	0.229911	0.585675	0.536816	0.590942	0.568328	0.437521	0.611565	0.537959	0.249988	0.671839	0.406768	0.292474	0.397577	0.530526	0.535363
F_13pcw_AMY	0.595675	0.53612	0.754837	0.731155	0.779567	0.393988	0.765384	0.453338	0.529959	0.632565	0.652263	0.629044	0.550909	0.472974	0.515593	0.457384	0.237356	0.597768	0.552926	0.602638	0.591211	0.44582	0.62092	0.567885	0.253163	0.67833	0.407911	0.274815	0.384101	0.54016	0.532157
F_13pcw_IPC	0.594905	0.534683	0.752359	0.74166	0.762671	0.47	0.759474	0.441496	0.51031	0.658466	0.628676	0.52525	0.533429	0.448701	0.481694	0.435401	0.221219	0.604548	0.525776	0.582019	0.578957	0.43687	0.60257	0.555071	0.261613	0.672334	0.419079	0.268819	0.360863	0.5415	0.542989
F_13pcw_CB	0.594042	0.533295	0.75501	0.735587	0.775009	0.440182	0.739692	0.450625	0.527577	0.695175	0.666735	0.531989	0.558018	0.459991	0.518262	0.460922	0.279136	0.585099	0.529223	0.595084	0.57969	0.440929	0.60907	0.551143	0.26994	0.655536	0.445386	0.298864	0.415725	0.557048	0.556224
F_13pcw_DFC	0.599232	0.537104	0.755462	0.750492	0.759403	0.471781	0.760091	0.435397	0.513666	0.62378	0.64354	0.551624	0.532279	0.450798	0.484179	0.441989	0.255547	0.60495	0.527445	0.585249	0.565733	0.440498	0.609196	0.53261	0.250595	0.665362	0.393716	0.267677	0.362074	0.552457	0.543825
F_13pcw_OFC	0.593624	0.532111	0.769189	0.758939	0.778967	0.491634	0.772904	0.432668	0.507563	0.617981	0.636384	0.546093	0.534959	0.464241	0.491493	0.445774	0.27541	0.627293	0.522425	0.578158	0.576106	0.438496	0.604919	0.554084	0.235915	0.674426	0.39278	0.273789	0.350874	0.53789	0.529228
F_13pcw_STC	0.587292	0.523203	0.731512	0.727719	0.734194	0.445271	0.736349	0.449123	0.500855	0.656966	0.633216	0.561627	0.511007	0.431341	0.469131	0.428101	0.239167	0.588085	0.514714	0.573096	0.579463	0.427763	0.597822	0.552134	0.25633	0.646235	0.421067	0.259178	0.364498	0.541804	0.529837
F_13pcw_A1C	0.603771	0.525947	0.762637	0.74301	0.782846	0.453884	0.765362	0.449854	0.508997	0.679144	0.638635	0.574696	0.544426	0.439051	0.50038	0.444849	0.254175	0.611188	0.543655	0.59837	0.608334	0.447956	0.619272	0.604872	0.264956	0.699154	0.436152	0.281952	0.39938	0.555694	0.546233
F_13pcw_HIP	0.594784	0.545456	0.746144	0.730203	0.762293	0.433798	0.755082	0.444828	0.523721	0.637761	0.662208	0.573774	0.543697	0.464732	0.499353	0.451459	0.240005	0.592739	0.53411	0.595148	0.597319	0.447674	0.618138	0.583077	0.250785	0.675138	0.416747	0.28534	0.406548	0.562686	0.552702
F_13pcw_M1C	0.597521	0.528497	0.762822	0.752592	0.772591	0.481704	0.770168	0.44681	0.502521	0.640858	0.639278	0.533275	0.539463	0.437377	0.478808	0.435181	0.230852	0.630874	0.525791	0.580178	0.57464	0.4378	0.604041	0.549895	0.26225	0.666216	0.413613	0.26128	0.358876	0.544113	0.542125
F_13pcw_ITC	0.591993	0.515422	0.739219	0.722326	0.756438	0.452357	0.745406	0.451492	0.500163	0.65584	0.634368	0.560389	0.532311	0.433708	0.481316	0.439754	0.238471	0.593372	0.528126	0.585698	0.584685	0.431451	0.601195	0.562402	0.239335	0.659953	0.407224	0.266438	0.366152	0.53708	0.515502
F_13pcw_MD	0.590601	0.517113	0.739495	0.717693	0.762169	0.449814	0.728019	0.429567	0.509937	0.687754	0.639983	0.553705	0.537594	0.419345	0.497375	0.448971	0.277914	0.536758	0.515483	0.573616	0.581964	0.432646	0.605233	0.557414	0.273523	0.675914	0.417196	0.280781	0.394059	0.562863	0.566928
F_13pcw_MFC	0.600726	0.548882	0.764126	0.752766	0.775146	0.47721	0.771789	0.452382	0.52224	0.628479	0.662331	0.542176	0.549656	0.468766	0.501565	0.446792	0.24662	0.616376	0.537033	0.59318	0.570796	0.43903	0.615321	0.541389	0.258386	0.677926	0.412411	0.279937	0.384364	0.557675	0.549157
F_13pcw_VFC	0.603886	0.533747	0.757171	0.745613	0.768427	0.497422	0.769152	0.444998	0.504808	0.627798	0.639088	0.519297	0.548173	0.439518	0.480944	0.431255	0.207832	0.629494	0.52298	0.58372	0.578878	0.435514	0.610123	0.559671	0.266789	0.663622	0.432955	0.277562	0.36742	0.543006	0.545063
M_13pcw_S1C.1	0.589475	0.520072	0.744971	0.743261	0.745311	0.463653	0.748704	0.43989	0.503771	0.632897	0.605576	0.532707	0.526277	0.43515	0.488532	0.433844	0.216485	0.597812	0.516381	0.570565	0.570117	0.427105	0.593269	0.529285	0.255114	0.640662	0.420547	0.255135	0.33994	0.525985	0.522044
M_13pcw_DFC.1	0.583706	0.511965	0.725217	0.720511	0.728927	0.470719	0.728918	0.438008	0.497099	0.605447	0.595897	0.548587	0.52929	0.436771	0.49145	0.425788	0.223835	0.589197	0.503496	0.560446	0.567147	0.425461	0.591598	0.519097	0.258057	0.628517	0.430012	0.263664	0.348865	0.537256	0.52872
M_13pcw_CB	0.595888	0.532644	0.774719	0.753272	0.796925	0.451077	0.75805	0.448031	0.534939	0.68603	0.643962	0.559599	0.542836	0.46206	0.527144	0.458	0.268331	0.594629	0.530139	0.597103	0.5848	0.439356	0.610688	0.560789	0.266815	0.658478	0.447852	0.289916	0.423665	0.565143	0.560559
M_13pcw_AMY.1	0.587146	0.516184	0.733808	0.711446	0.757115	0.374215	0.742661	0.453091	0.531853	0.606635	0.608815	0.613772	0.535221	0.468798	0.528701	0.455875	0.231572	0.597834	0.535809	0.587797	0.601096	0.449231	0.615583	0.570372	0.242935	0.648427	0.424622	0.263055	0.379353	0.536741	0.539147
M_13pcw_ITC.1	0.583101	0.50473	0.734082	0.726056	0.741463	0.445061	0.736769	0.428938	0.510307	0.594085	0.606985	0.559674	0.514022	0.45708	0.506531	0.434583	0.214312	0.593908	0.519038	0.566616	0.579606	0.42334	0.591341	0.545418	0.238575	0.644587	0.404642	0.261841	0.357628	0.533882	0.525061
M_13pcw_HIP.1	0.578802	0.521769	0.728014	0.715665	0.74021	0.399258	0.737606	0.440796	0.52177	0.603604	0.618763	0.57721	0.537185	0.465	0.508418	0.439782	0.265663	0.585181	0.516391	0.572419	0.583372	0.43307	0.60632	0.549131	0.240442	0.653057	0.415171	0.28831	0.408775	0.5335	0.53127
M_13pcw_IPC.1	0.589245	0.53334	0.760444	0.758912	0.760554	0.455698	0.760249	0.443438	0.50152	0.652098	0.621622	0.530339	0.521162	0.440925	0.476354	0.424684	0.19763	0.616462	0.527243	0.579323	0.572008	0.432967	0.597472	0.538676	0.251441	0.647524	0.438052	0.259299	0.355506	0.530409	0.524148
M_13pcw_A1C.1	0.589979	0.527152	0.727496	0.719753	0.734576	0.44889	0.733624	0.450404	0.499218	0.651171	0.624012	0.544506	0.508906	0.434236	0.49306	0.428014	0.243253	0.590341	0.514913	0.564182	0.594527	0.428387	0.593983	0.568563	0.2494	0.652956	0.421381	0.258806	0.354646	0.536108	0.521226
M_13pcw_VFC.1	0.58088	0.517612	0.710896	0.711506	0.708729	0.46608	0.71548	0.453553	0.495081	0.610983	0.590168	0.534543	0.512198	0.417776	0.493414	0.429574	0.214324	0.590146	0.50013	0.555793	0.576079	0.421338	0.589318	0.537644	0.254417	0.626867	0.406944	0.247139	0.341252	0.531173	0.51636
M_13pcw_STR.1	0.570523	0.495798	0.706465	0.678881	0.735632	0.425623	0.706933	0.401703	0.503616	0.653335	0.603238	0.603902	0.523569	0.440151	0.508091	0.437352	0.264705	0.571003	0.510293	0.569329	0.584398	0.423784	0.592193	0.559404	0.250199	0.642018	0.407115	0.267096	0.379775	0.518176	0.514093
M_13pcw_OFC.1	0.567381	0.492205	0.678747	0.681334	0.674452	0.425057	0.682741	0.439925	0.49907	0.600487	0.587815	0.568227	0.518114	0.435934	0.495876	0.435369	0.25242	0.558915	0.49531	0.555688	0.564673	0.414487	0.580599	0.516064	0.245672	0.624733	0.377831	0.256799	0.341197	0.53716	0.524463
M_13pcw_MFC.1	0.56648	0.495055	0.68518	0.68731	0.68138	0.446074	0.689641	0.429889	0.504351	0.562281	0.588445	0.553532	0.511347	0.448249	0.506515	0.435622	0.27005	0.572	0.497506	0.561107	0.558797	0.417863	0.584328	0.512411	0.240178	0.624183	0.392616	0.261409	0.33581	0.526046	0.521653
M_13pcw_V1C.1	0.58444	0.520453	0.748133	0.747893	0.746833	0.431321	0.754282	0.459257	0.519644	0.603324	0.626902	0.536861	0.542671	0.467101	0.502459	0.434755	0.223188	0.587495	0.527463	0.581103	0.563903	0.441205	0.603562	0.523253	0.247237	0.647663	0.408449	0.275172	0.388949	0.529386	0.521559
M_13pcw_M1C.1	0.590932	0.525618	0.752621	0.745783	0.758643	0.467534	0.757238	0.436845	0.506584	0.628391	0.620246	0.545905	0.540014	0.458709	0.484457	0.433466	0.217258	0.601345	0.529428	0.585741	0.571302	0.435646	0.597837	0.534258	0.257998	0.651051	0.403889	0.264222	0.361426	0.545392	0.532697
M_16pcw_VFC	0.59868	0.532378	0.749929	0.741539	0.757679	0.445655	0.744062	0.448565	0.508022	0.658701	0.649325	0.580863	0.549708	0.46391	0.48974	0.439896	0.236046	0.575498	0.547946	0.600204	0.585322	0.438931	0.618592	0.560443	0.267802	0.689334	0.418141	0.273881	0.397921	0.536569	0.529494
M_16pcw_OFC	0.59696	0.546366	0.746319	0.739274	0.752583	0.463339	0.741238	0.442092	0.500036	0.668237	0.658778	0.564696	0.549838	0.44052	0.467189	0.434216	0.217997	0.575969	0.535172	0.592415	0.586454	0.439123	0.614651	0.558632	0.264885	0.673614	0.424302	0.278139	0.373472	0.529194	0.511089
M_16pcw_STC	0.588962	0.524035	0.737757	0.731421	0.743251	0.412483	0.738388	0.45945	0.5074	0.639596	0.648281	0.594963	0.540082	0.44219	0.483639	0.439319	0.228823	0.567481	0.545299	0.5897	0.58808	0.436976	0.612916	0.560351	0.24319	0.677611	0.416894	0.278189	0.396093	0.547779	0.540478
M_16pcw_DFC	0.582087	0.523759	0.716122	0.714784	0.716108	0.466516	0.718237	0.443357	0.504242	0.612439	0.638696	0.572357	0.550601	0.446469	0.483044	0.437744	0.241468	0.557049	0.527077	0.579655	0.569158	0.4295	0.600187	0.533345	0.246748	0.642865	0.360158	0.272446	0.372243	0.520195	0.511678
M_16pcw_IPC	0.594379	0.521795	0.759546	0.74726	0.771607	0.44601	0.75561	0.436334	0.505504	0.652329	0.634727	0.579959	0.549491	0.460339	0.487976	0.438555	0.236009	0.61848	0.537573	0.584576	0.585991	0.43729	0.613843	0.555888	0.254882	0.676122	0.416211	0.267646	0.365512	0.516377	0.499809
M_16pcw_A1C	0.601346	0.545439	0.7658	0.754346	0.776921	0.449528	0.761185	0.434035	0.502761	0.669891	0.663471	0.545999	0.545654	0.445779	0.466627	0.435999	0.221596	0.598916	0.539574	0.594172	0.586015	0.445144	0.616013	0.564384	0.255932	0.679579	0.440331	0.2653	0.37942	0.534974	0.52267
M_16pcw_MFC	0.578664	0.530737	0.699621	0.703632	0.693701	0.429716	0.701834	0.432363	0.502067	0.60747	0.636142	0.575289	0.542098	0.451715	0.469039	0.427338	0.223942	0.549031	0.522055	0.578089	0.547681	0.429099	0.599211	0.495209	0.230484	0.630639	0.334134	0.278314	0.392535	0.516287	0.517326
M_16pcw_STR	0.595419	0.539837	0.776511	0.737426	0.818308	0.425646	0.768431	0.419706	0.506563	0.694451	0.652198	0.60294	0.54794	0.448897	0.500796	0.454503	0.229049	0.579079	0.550854	0.599537	0.599069	0.457994	0.629371	0.578491	0.244257	0.68986	0.434522	0.268579	0.387039	0.5401	0.530028
M_16pcw_MD	0.590889	0.505382	0.747423	0.725291	0.770446	0.46292	0.734098	0.455793	0.508821	0.675302	0.626082	0.610302	0.524073	0.438754	0.509341	0.451776	0.309629	0.555746	0.515329	0.578686	0.591926	0.437864	0.611167	0.552706	0.278006	0.695803	0.454045	0.294931	0.425649	0.582531	0.580918
M_16pcw_V1C	0.588944	0.520003	0.743067	0.74102	0.743787	0.44475	0.738997	0.450335	0.511998	0.647197	0.651551	0.560147	0.546245	0.460608	0.474951	0.436854	0.21583	0.568437	0.535253	0.588452	0.577025	0.436888	0.608501	0.541251	0.254694	0.662958	0.407527	0.273675	0.379032	0.508344	0.492209
M_16pcw_VFC.1	0.617525	0.561777	0.793424	0.771989	0.815577	0.455461	0.795937	0.449161	0.509872	0.655446	0.674224	0.526586	0.54508	0.437152	0.474698	0.44203	0.248625	0.627777	0.553596	0.59945	0.595339	0.443999	0.621578	0.579977	0.25686	0.703882	0.413576	0.277882	0.39299	0.546184	0.539608
M_16pcw_STC.1	0.602625	0.543794	0.77167	0.768301	0.773797	0.448426	0.769517	0.454128	0.518332	0.668345	0.668317	0.546409	0.55552	0.448854	0.481648	0.446149	0.242631	0.600444	0.555645	0.601998	0.584675	0.444581	0.619517	0.560876	0.268851	0.685765	0.436628	0.297493	0.416113	0.543331	0.541578
M_16pcw_IPC.1	0.609716	0.549777	0.786861	0.775649	0.79767	0.481904	0.785406	0.466499	0.508407	0.679329	0.659398	0.529188	0.538208	0.446056	0.494631	0.435424	0.233111	0.624593	0.542596	0.596402	0.594464	0.439027	0.613976	0.570487	0.254852	0.687958	0.433579	0.272639	0.386021	0.542681	0.537365
M_16pcw_A1C.1	0.607478	0.545602	0.802555	0.78521	0.820144	0.46267	0.80068	0.454081	0.512267	0.661063	0.650708	0.532747	0.536073	0.446105	0.494315	0.443352	0.252835	0.639503	0.547692	0.590841	0.604213	0.442478	0.614479	0.582098	0.249087	0.700239	0.450062	0.270411	0.367132	0.552626	0.550209
M_16pcw_MD.1	0.602186	0.538609	0.769585	0.743654	0.796782	0.452673	0.757693	0.434872	0.511876	0.730616	0.658982	0.548194	0.552664	0.450415	0.505692	0.455891	0.286569	0.580515	0.533295	0.590992	0.603165	0.450206	0.624616	0.578491	0.283822	0.713148	0.443245	0.284481	0.422771	0.584149	0.587188
M_16pcw_AMY	0.590557	0.528392	0.722839	0.713148	0.732091	0.410265	0.726501	0.456893	0.523251	0.639741	0.656379	0.616732	0.558433	0.466301	0.512846	0.455965	0.225878	0.561109	0.546976	0.601659	0.586054	0.439457	0.616144	0.55068	0.242653	0.673713	0.374035	0.298351	0.423	0.533134	0.536421
M_16pcw_V1C.1	0.598382	0.541263	0.786716	0.778452	0.794249	0.44244	0.782352	0.448647	0.524867	0.640532	0.658538	0.508858	0.550217	0.476131	0.492663	0.440735	0.239248	0.602626	0.543597	0.594788	0.580946	0.438184	0.618433	0.552009	0.236937	0.693449	0.398078	0.288999	0.399785	0.541824	0.531195
M_16pcw_ITC	0.612622	0.554262	0.793864	0.773358	0.814983	0.437951	0.801052	0.456356	0.522932	0.655279	0.664862	0.574976	0.562496	0.465534	0.506657	0.450447	0.248903	0.643278	0.555415	0.613559	0.611587	0.446368	0.626487	0.60077	0.253178	0.724196	0.438243	0.285107	0.408353	0.570289	0.563695
M_16pcw_CBC	0.574982	0.510931	0.705267	0.708149	0.700587	0.412139	0.701213	0.448595	0.524122	0.672199	0.638141	0.550357	0.531425	0.449497	0.515706	0.4608	0.315042	0.534303	0.52043	0.59	0.57064	0.422266	0.600998	0.537214	0.27735	0.650572	0.433405	0.313428	0.438026	0.566562	0.583863
M_16pcw_HIP	0.606653	0.545139	0.781382	0.759726	0.803806	0.450952	0.787472	0.462405	0.531512	0.650239	0.655239	0.573864	0.549784	0.461371	0.51773	0.461215	0.257116	0.640761	0.549475	0.602944	0.613298	0.446619	0.629848	0.59853	0.284502	0.724415	0.492018	0.294005	0.416346	0.567357	0.560596
M_16pcw_STR.1	0.606461	0.545384	0.7931	0.760071	0.828135	0.426599	0.789007	0.450171	0.526567	0.700964	0.665522	0.618245	0.556652	0.457955	0.524031	0.464855	0.263437	0.602164	0.555323	0.609647	0.609446	0.455881	0.635358	0.597091	0.262571	0.718388	0.448225	0.286141	0.418747	0.562968	0.558955
M_16pcw_OFC.1	0.611425	0.545601	0.79059	0.767599	0.814478	0.461	0.800245	0.461453	0.521061	0.629751	0.661818	0.525814	0.539206	0.448295	0.504405	0.451406	0.253179	0.63118	0.551978	0.599089	0.599043	0.445496	0.6256	0.584265	0.263554	0.710499	0.436415	0.277464	0.382627	0.544739	0.543429
M_16pcw_DFC.1	0.613673	0.554158	0.788538	0.776024	0.80079	0.461674	0.795954	0.450951	0.525925	0.624012	0.646696	0.538934	0.560656	0.472944	0.501711	0.449584	0.252421	0.625471	0.552503	0.606383	0.593014	0.448831	0.625194	0.574228	0.261281	0.698137	0.40146	0.280503	0.395645	0.548927	0.550543
M_16pcw_M1C	0.610701	0.543919	0.79678	0.776279	0.817888	0.464809	0.799882	0.458029	0.504309	0.653964	0.64412	0.534426	0.52365	0.445991	0.495135	0.444018	0.239662	0.640039	0.535682	0.59122	0.600876	0.436914	0.617592	0.574929	0.258913	0.698252	0.421877	0.255567	0.356545	0.553707	0.54513
M_16pcw_MFC.1	0.612121	0.563035	0.785016	0.768916	0.801259	0.444392	0.79411	0.446408	0.525549	0.620237	0.66607	0.529322	0.548601	0.469063	0.503574	0.440847	0.236024	0.613619	0.546334	0.601005	0.587639	0.439006	0.619589	0.563751	0.245728	0.703223	0.398499	0.281928	0.384797	0.544379	0.535843
M_16pcw_S1C	0.607227	0.543729	0.797157	0.777614	0.8172	0.461211	0.794017	0.454798	0.512313	0.679898	0.640725	0.541139	0.541244	0.428432	0.489021	0.441117	0.224164	0.627798	0.545626	0.597791	0.603253	0.438149	0.62066	0.587315	0.264214	0.699741	0.447454	0.275097	0.382715	0.540792	0.536029
M_16pcw_HIP.1	0.584693	0.510357	0.743647	0.732222	0.754783	0.411454	0.743258	0.456709	0.515415	0.595753	0.609143	0.612841	0.54146	0.469446	0.509577	0.449359	0.263468	0.609838	0.530112	0.579684	0.566649	0.430655	0.598236	0.516032	0.232804	0.62617	0.365563	0.285847	0.399811	0.555543	0.556589
M_16pcw_ITC.1	0.593889	0.517982	0.749786	0.734751	0.764919	0.440677	0.755164	0.450599	0.503285	0.658644	0.631623	0.595905	0.533956	0.429231	0.48728	0.444154	0.244065	0.6058	0.539401	0.592625	0.59953	0.44238	0.614157	0.575691	0.258969	0.681457	0.436415	0.267333	0.378316	0.553039	0.551509
M_16pcw_DFC.2	0.58609	0.504818	0.724258	0.716011	0.731905	0.437571	0.727534	0.435632	0.497602	0.617225	0.601079	0.551961	0.517875	0.427088	0.496757	0.434274	0.270906	0.586515	0.515814	0.576171	0.591047	0.421636	0.588706	0.563325	0.262344	0.658824	0.433251	0.259768	0.34942	0.545215	0.532292
M_16pcw_IPC.2	0.608145	0.52847	0.786103	0.768484	0.804031	0.501266	0.784144	0.460961	0.512146	0.674629	0.648001	0.557914	0.556774	0.462347	0.486024	0.44392	0.223838	0.621194	0.545805	0.606089	0.600311	0.444846	0.622473	0.579612	0.266867	0.702256	0.449576	0.289931	0.391711	0.553759	0.541097
M_16pcw_STC.2	0.603251	0.539359	0.773826	0.753748	0.794511	0.439139	0.774665	0.462335	0.50765	0.65725	0.64927	0.57656	0.544376	0.451507	0.489238	0.438457	0.232182	0.617669	0.551153	0.603639	0.60152	0.440761	0.61498	0.578278	0.280493	0.690358	0.458662	0.282421	0.389048	0.558377	0.551439
M_16pcw_V1C.2	0.583547	0.505157	0.732024	0.724217	0.739165	0.436654	0.728399	0.45187	0.500638	0.651534	0.619392	0.556451	0.536	0.437202	0.492726	0.438177	0.263976	0.585371	0.52263	0.581424	0.582859	0.423587	0.592791	0.551045	0.26426	0.665899	0.439265	0.279577	0.385566	0.553609	0.547387
M_16pcw_MD.2	0.575954	0.494434	0.686207	0.669321	0.703531	0.436942	0.677927	0.439881	0.495164	0.711834	0.597258	0.589646	0.52194	0.416443	0.509803	0.446802	0.295826	0.516211	0.509969	0.564857	0.599695	0.443367	0.600959	0.563311	0.261561	0.673357	0.430951	0.273122	0.38149	0.567069	0.573722
M_16pcw_STR.2	0.593169	0.514185	0.775693	0.743699	0.809615	0.428974	0.766215	0.448692	0.511846	0.693953	0.608264	0.618681	0.540629	0.438566	0.523931	0.459657	0.270868	0.577366	0.539525	0.596257	0.616042	0.4484	0.619677	0.600769	0.255504	0.69163	0.450253	0.273869	0.380265	0.56012	0.556304
M_16pcw_M1C.S1C	0.609743	0.534185	0.767947	0.756417	0.779149	0.45891	0.769004	0.455479	0.507898	0.648052	0.626583	0.567581	0.534977	0.451759	0.500158	0.445666	0.272114	0.608447	0.534214	0.594141	0.600128	0.437155	0.610171	0.578448	0.274425	0.680795	0.428246	0.276831	0.389495	0.551272	0.547061
M_16pcw_A1C.2	0.597975	0.520459	0.768399	0.753421	0.783431	0.440602	0.767743	0.440014	0.505098	0.65934	0.634573	0.567403	0.536239	0.443098	0.485037	0.442803	0.229642	0.623811	0.53346	0.594028	0.601878	0.434344	0.610537	0.579771	0.27315	0.679466	0.457715	0.275277	0.378087	0.548072	0.53683
M_16pcw_VFC.2	0.610478	0.527216	0.771209	0.754049	0.788659	0.500695	0.773878	0.452316	0.511912	0.637886	0.630157	0.566987	0.537328	0.443454	0.49604	0.445848	0.257552	0.619991	0.548475	0.599724	0.598993	0.434859	0.610781	0.581385	0.290123	0.688511	0.45364	0.285416	0.406923	0.559815	0.547967
M_16pcw_AMY.1	0.599489	0.516348	0.779367	0.760611	0.798574	0.453897	0.7794	0.460549	0.520967	0.662257	0.618809	0.642766	0.531014	0.451444	0.533081	0.462387	0.259503	0.615432	0.554004	0.60301	0.618207	0.450675	0.62487	0.599746	0.257951	0.697421	0.457331	0.278528	0.388225	0.571508	0.5611
M_16pcw_MFC.2	0.587667	0.504986	0.722451	0.714771	0.729472	0.442203	0.710772	0.444685	0.519044	0.666078	0.618612	0.573284	0.53579	0.445096	0.514858	0.448595	0.281439	0.534924	0.522645	0.578774	0.584862	0.422437	0.597953	0.550115	0.27313	0.675229	0.441147	0.290708	0.402953	0.56812	0.56267
F_17pcw_STR	0.588214	0.531877	0.717523	0.70877	0.725746	0.413101	0.711274	0.437241	0.50321	0.684186	0.672408	0.626274	0.544136	0.438249	0.491896	0.460451	0.263482	0.527321	0.553868	0.605024	0.59291	0.452415	0.622013	0.572605	0.254479	0.688654	0.43283	0.30182	0.427222	0.544516	0.561606
F_17pcw_STC	0.597028	0.549033	0.761287	0.74966	0.772611	0.434994	0.758215	0.459419	0.498141	0.643333	0.673405	0.564581	0.548206	0.442492	0.466391	0.43846	0.209553	0.59905	0.55009	0.599821	0.584873	0.443577	0.61879	0.554411	0.233506	0.673167	0.404759	0.269517	0.38975	0.521237	0.510257
F_17pcw_MD	0.592245	0.520208	0.717613	0.704722	0.730433	0.415004	0.706895	0.447654	0.513024	0.707535	0.641664	0.598833	0.541213	0.443881	0.518117	0.464753	0.291366	0.54	0.528362	0.577745	0.589947	0.441739	0.610167	0.555389	0.278021	0.67811	0.445088	0.297003	0.414123	0.570693	0.577622
F_17pcw_A1C	0.59997	0.531381	0.764504	0.750312	0.778672	0.445101	0.764702	0.43931	0.49212	0.655318	0.658881	0.579954	0.543123	0.439514	0.471052	0.440606	0.250622	0.614574	0.540168	0.597847	0.601567	0.451542	0.620474	0.579196	0.268026	0.678037	0.453675	0.261624	0.375787	0.533062	0.528228
F_17pcw_HIP	0.593477	0.548159	0.717521	0.712718	0.721355	0.431501	0.717673	0.449183	0.512514	0.643743	0.666075	0.591464	0.563114	0.459273	0.485222	0.454306	0.253732	0.575103	0.549383	0.609859	0.581374	0.444311	0.624141	0.564164	0.266222	0.698245	0.441726	0.308856	0.445605	0.54676	0.553169
F_17pcw_DFC	0.604886	0.551805	0.754259	0.746205	0.761627	0.479307	0.758362	0.451124	0.500808	0.640307	0.672348	0.569679	0.545842	0.436309	0.467896	0.440562	0.23382	0.596266	0.55306	0.608523	0.586089	0.4511	0.622974	0.565497	0.252152	0.687903	0.388187	0.275475	0.395076	0.519489	0.5119
F_17pcw_VFC	0.607804	0.561859	0.759647	0.750825	0.767858	0.46838	0.763024	0.445071	0.519167	0.647851	0.676457	0.583089	0.557463	0.457096	0.488837	0.452682	0.249072	0.591336	0.55916	0.607925	0.593825	0.455777	0.628588	0.574118	0.260487	0.683353	0.398805	0.280676	0.405804	0.539973	0.529879
F_17pcw_IPC	0.596188	0.520618	0.780975	0.761689	0.800765	0.457082	0.774511	0.446662	0.490451	0.675594	0.626852	0.537794	0.529994	0.430563	0.478932	0.436929	0.236614	0.605659	0.543375	0.593284	0.604938	0.441	0.618195	0.576275	0.256946	0.681999	0.44931	0.252038	0.347551	0.531368	0.510495
F_17pcw_M1C.S1C	0.602988	0.542964	0.758431	0.748159	0.768256	0.455584	0.758807	0.465598	0.499041	0.663917	0.636246	0.566749	0.541177	0.451021	0.483212	0.438055	0.26481	0.599456	0.547252	0.598964	0.602354	0.443824	0.62156	0.580019	0.273167	0.68018	0.437848	0.263817	0.372717	0.545683	0.527205
F_17pcw_V1C	0.598407	0.546687	0.765101	0.75479	0.774955	0.467138	0.761333	0.455306	0.511173	0.666547	0.65845	0.567495	0.555814	0.475749	0.480623	0.440309	0.233438	0.589863	0.556282	0.607078	0.584186	0.443999	0.619926	0.557144	0.24953	0.683225	0.424636	0.275497	0.395278	0.519537	0.501698
F_17pcw_CBC	0.591807	0.525959	0.741455	0.736372	0.745551	0.441689	0.734969	0.454902	0.513422	0.69681	0.640181	0.574802	0.535627	0.448726	0.520301	0.46863	0.313217	0.568715	0.535022	0.591729	0.580019	0.43522	0.611211	0.541034	0.2619	0.663869	0.432275	0.295846	0.418708	0.559516	0.56965
F_17pcw_OFC	0.607378	0.554052	0.763907	0.75107	0.776569	0.467533	0.767005	0.443771	0.510546	0.634181	0.652149	0.60705	0.544642	0.44371	0.501609	0.451404	0.270521	0.612799	0.551937	0.598196	0.600521	0.45532	0.623934	0.581255	0.250331	0.683028	0.412261	0.265615	0.367685	0.549592	0.531893
F_17pcw_AMY	0.595091	0.531936	0.745216	0.729259	0.761384	0.41721	0.747705	0.46172	0.517223	0.615844	0.646204	0.633485	0.552726	0.465088	0.505541	0.450376	0.241219	0.601163	0.550805	0.598861	0.58495	0.445656	0.617516	0.549469	0.241544	0.66269	0.400392	0.276799	0.387274	0.543839	0.543838
F_17pcw_MFC	0.603259	0.551511	0.762098	0.751926	0.771804	0.470421	0.763583	0.46089	0.503545	0.63667	0.650106	0.587084	0.543784	0.4448	0.485078	0.445633	0.273264	0.606697	0.547445	0.602158	0.597671	0.440273	0.623284	0.573325	0.258204	0.686955	0.408436	0.270979	0.378755	0.542783	0.530343
F_19pcw_STC	0.591515	0.529577	0.72897	0.715251	0.742685	0.4462	0.725626	0.43829	0.496121	0.637624	0.66333	0.597318	0.552226	0.437921	0.457834	0.434648	0.226651	0.579721	0.551932	0.594461	0.578717	0.444284	0.610996	0.547377	0.245489	0.662777	0.403637	0.276001	0.406384	0.520876	0.513875
F_19pcw_IPC	0.589989	0.526986	0.716328	0.707603	0.724522	0.431647	0.711307	0.427582	0.49487	0.636653	0.653958	0.573538	0.544373	0.446465	0.462621	0.424557	0.239723	0.571436	0.545267	0.59461	0.579676	0.439204	0.60559	0.545456	0.254865	0.653745	0.418196	0.281214	0.396328	0.505381	0.502798
F_19pcw_M1C.S1C	0.589463	0.511336	0.70759	0.702587	0.711667	0.447889	0.703	0.449259	0.494912	0.645752	0.645705	0.575036	0.543659	0.444155	0.461691	0.43038	0.249864	0.551867	0.538968	0.592349	0.580782	0.440337	0.61125	0.543155	0.266068	0.65769	0.425903	0.277618	0.396167	0.506206	0.508247
F_19pcw_MFC	0.597954	0.555395	0.715236	0.713424	0.715752	0.429695	0.714673	0.451047	0.506648	0.628095	0.670846	0.593134	0.550134	0.446978	0.476549	0.450636	0.252777	0.545549	0.552517	0.603384	0.574045	0.447377	0.61919	0.544921	0.262839	0.671235	0.406388	0.295297	0.415258	0.532568	0.534039
F_19pcw_V1C	0.589594	0.527995	0.698236	0.687625	0.708564	0.449743	0.697325	0.441448	0.502009	0.635485	0.666089	0.569521	0.557734	0.459986	0.452667	0.42544	0.247503	0.568498	0.547136	0.595672	0.573661	0.434058	0.609611	0.535586	0.263125	0.645006	0.418458	0.291376	0.42301	0.500603	0.503917
F_19pcw_HIP	0.577592	0.530769	0.707647	0.704655	0.70949	0.406867	0.698057	0.437635	0.500464	0.606542	0.656732	0.596275	0.541168	0.448798	0.479917	0.453505	0.254394	0.557731	0.535915	0.584498	0.569366	0.43022	0.604783	0.539874	0.242118	0.680922	0.425401	0.303925	0.440769	0.545681	0.559008
F_19pcw_A1C	0.591534	0.535505	0.729281	0.715758	0.742779	0.465041	0.726033	0.443067	0.492624	0.643891	0.661735	0.577362	0.547387	0.440788	0.45795	0.428726	0.206285	0.584311	0.548861	0.592129	0.572521	0.434178	0.607963	0.541019	0.244738	0.658365	0.409917	0.278246	0.403403	0.519112	0.517391
F_19pcw_MD	0.58832	0.522621	0.708178	0.690426	0.726417	0.459666	0.695655	0.435055	0.504617	0.674838	0.649016	0.603482	0.53918	0.434503	0.487598	0.446467	0.292018	0.520516	0.52975	0.583732	0.56392	0.429518	0.606244	0.515524	0.248684	0.673362	0.430128	0.303037	0.451118	0.556244	0.571708
F_19pcw_VFC	0.607524	0.549005	0.739462	0.727298	0.751427	0.452644	0.741795	0.456544	0.501816	0.661336	0.656595	0.573768	0.553205	0.449522	0.469393	0.442307	0.244323	0.59251	0.558488	0.608769	0.596532	0.448378	0.622713	0.580652	0.251156	0.685137	0.392904	0.273532	0.382999	0.530959	0.517883
F_19pcw_STR	0.586883	0.536103	0.721121	0.702398	0.740413	0.406897	0.711662	0.429944	0.517147	0.661065	0.657195	0.643703	0.55585	0.469794	0.506481	0.457778	0.258366	0.527403	0.544424	0.597179	0.57702	0.449423	0.61501	0.546179	0.253229	0.662805	0.436254	0.301585	0.430833	0.537655	0.545675
F_19pcw_DFC	0.594157	0.544373	0.721056	0.716239	0.724899	0.44056	0.722925	0.448328	0.49178	0.621617	0.66801	0.595268	0.546435	0.445383	0.461868	0.438968	0.226002	0.570775	0.54348	0.588957	0.577807	0.433461	0.609572	0.554703	0.259323	0.653253	0.406233	0.273657	0.387252	0.510231	0.504025
F_21pcw_CBC	0.598644	0.536197	0.761357	0.738628	0.785014	0.439611	0.755906	0.443169	0.507241	0.692466	0.634412	0.527982	0.53287	0.425408	0.50991	0.463684	0.324872	0.597308	0.53755	0.593569	0.5839	0.435234	0.613219	0.538497	0.240784	0.6648	0.426213	0.27612	0.388951	0.566149	0.564329
F_21pcw_ITC	0.59971	0.541922	0.772237	0.758721	0.785635	0.44973	0.771191	0.460748	0.498554	0.663162	0.674162	0.57997	0.552506	0.450717	0.473251	0.439011	0.272979	0.620889	0.547648	0.60295	0.593122	0.443831	0.61901	0.573195	0.26035	0.707701	0.433318	0.277235	0.40585	0.548508	0.553989
M_21pcw_MFC	0.60715	0.529952	0.783008	0.771674	0.79396	0.49594	0.778583	0.456253	0.500106	0.680136	0.637375	0.584514	0.542654	0.434767	0.485279	0.450326	0.271028	0.598134	0.558874	0.60946	0.616287	0.45494	0.632213	0.602852	0.293225	0.719171	0.470767	0.27946	0.395879	0.568322	0.552782
M_21pcw_M1C	0.607769	0.536352	0.778577	0.76518	0.79183	0.451822	0.778183	0.455824	0.506634	0.646679	0.629944	0.573872	0.542426	0.445904	0.503778	0.451274	0.262279	0.627366	0.556171	0.602063	0.599247	0.44927	0.622939	0.582394	0.269787	0.699817	0.429788	0.272044	0.385235	0.550435	0.53668
M_21pcw_STR	0.592843	0.521636	0.759804	0.726893	0.794777	0.441921	0.753765	0.44062	0.502322	0.711645	0.635281	0.603276	0.545476	0.43189	0.491727	0.456796	0.289596	0.586657	0.551791	0.600389	0.610771	0.457296	0.630779	0.60624	0.270324	0.702677	0.452621	0.292962	0.418576	0.555389	0.555806
M_21pcw_HIP	0.606773	0.547264	0.77418	0.762527	0.785505	0.429901	0.772051	0.475852	0.514825	0.651814	0.646207	0.600638	0.545597	0.447537	0.516162	0.465693	0.284193	0.618218	0.55517	0.602921	0.61861	0.460138	0.632509	0.610659	0.268061	0.733918	0.464798	0.295449	0.415593	0.581734	0.579343
M_21pcw_STC	0.612247	0.536742	0.783199	0.770004	0.796219	0.466048	0.776688	0.457754	0.502345	0.669948	0.656359	0.576758	0.549195	0.445935	0.493208	0.452127	0.267983	0.60803	0.551166	0.604637	0.604421	0.454325	0.62959	0.592935	0.287681	0.71774	0.474894	0.277849	0.384905	0.556709	0.547688
M_21pcw_ITC	0.613197	0.540748	0.786893	0.772233	0.801533	0.47405	0.78367	0.461553	0.501335	0.666301	0.651639	0.570737	0.539902	0.439204	0.489132	0.451605	0.300661	0.621662	0.550732	0.605956	0.608235	0.445228	0.625999	0.59406	0.287178	0.71545	0.45309	0.271697	0.384069	0.557008	0.547799
M_21pcw_AMY	0.603079	0.537349	0.780089	0.764401	0.795885	0.449327	0.782756	0.465345	0.514953	0.653428	0.643613	0.594292	0.548057	0.445166	0.506222	0.46193	0.286136	0.615561	0.553291	0.605174	0.620434	0.455288	0.629706	0.610391	0.264812	0.724622	0.456555	0.286327	0.400955	0.580159	0.574798
M_21pcw_VFC	0.603743	0.53247	0.781221	0.764744	0.79789	0.445364	0.781944	0.47803	0.521913	0.656307	0.640377	0.620489	0.545734	0.449988	0.519994	0.464583	0.31166	0.633411	0.55831	0.609681	0.611788	0.461249	0.630459	0.598715	0.275754	0.727764	0.475345	0.296808	0.414551	0.582895	0.577652
M_21pcw_OFC	0.597458	0.526356	0.760465	0.753143	0.767008	0.477414	0.759	0.450494	0.489418	0.664435	0.634404	0.577239	0.548945	0.431774	0.476514	0.444394	0.29114	0.583383	0.540981	0.595631	0.598703	0.441048	0.614342	0.580889	0.278384	0.698871	0.4463	0.272959	0.379205	0.554341	0.543784
M_21pcw_V1C	0.610795	0.535781	0.786747	0.774451	0.798761	0.467785	0.778932	0.466815	0.509639	0.690268	0.656048	0.572003	0.551727	0.444584	0.487685	0.447365	0.259779	0.61352	0.555158	0.608585	0.609744	0.456628	0.628214	0.591603	0.269505	0.702382	0.457299	0.275076	0.403433	0.545603	0.536318
M_21pcw_S1C	0.608565	0.538925	0.775947	0.76337	0.788295	0.480012	0.7729	0.456362	0.501715	0.660834	0.636923	0.56816	0.544441	0.439566	0.498052	0.449225	0.280338	0.594249	0.547952	0.601477	0.61192	0.451749	0.623994	0.603592	0.286386	0.705394	0.460156	0.275194	0.390609	0.558563	0.548149
M_21pcw_CBC	0.594015	0.527608	0.748937	0.734461	0.763452	0.448668	0.742768	0.458864	0.519681	0.684882	0.626672	0.560988	0.537786	0.441197	0.524317	0.468373	0.307544	0.594917	0.534703	0.595605	0.588198	0.440489	0.611773	0.546995	0.26218	0.664768	0.435226	0.285504	0.399109	0.56567	0.566495
M_21pcw_IPC	0.606762	0.532783	0.772604	0.758973	0.786131	0.475635	0.773091	0.458554	0.505534	0.656785	0.630458	0.567111	0.541708	0.439315	0.491818	0.449763	0.265061	0.618357	0.552432	0.60315	0.601886	0.442425	0.619634	0.585913	0.28207	0.703981	0.451	0.272813	0.390518	0.552787	0.542172
M_21pcw_DFC	0.605161	0.528625	0.766817	0.760022	0.772761	0.453339	0.759237	0.457967	0.507212	0.677933	0.642362	0.589915	0.553957	0.447951	0.493621	0.452148	0.259912	0.598122	0.556279	0.612087	0.605306	0.450097	0.627918	0.58697	0.283809	0.707417	0.483176	0.298766	0.423837	0.551845	0.548017
M_24pcw_HIP	0.590023	0.520972	0.702447	0.709061	0.693629	0.407186	0.706398	0.46134	0.510451	0.633862	0.628503	0.615653	0.538519	0.444119	0.522935	0.462531	0.336033	0.569458	0.525083	0.592521	0.59411	0.446368	0.616002	0.563294	0.265531	0.700747	0.4474	0.304675	0.411505	0.574456	0.572121
M_24pcw_AMY	0.582569	0.515711	0.71793	0.720021	0.714103	0.391252	0.723646	0.456927	0.518183	0.617421	0.636462	0.593068	0.552021	0.443331	0.508029	0.455114	0.293804	0.598872	0.53189	0.586069	0.565996	0.435118	0.60482	0.519367	0.263351	0.654394	0.402815	0.301319	0.421049	0.560934	0.568093
M_24pcw_DFC	0.607672	0.533274	0.75246	0.741566	0.762987	0.474938	0.757583	0.445814	0.506225	0.637105	0.632452	0.558834	0.53184	0.436529	0.49919	0.442614	0.329994	0.579449	0.531635	0.595262	0.599723	0.446402	0.620552	0.56776	0.276942	0.697446	0.442975	0.307768	0.412199	0.574996	0.565118
M_24pcw_S1C	0.611931	0.5413	0.767359	0.761459	0.772308	0.480926	0.764847	0.462118	0.512028	0.671215	0.653493	0.566178	0.55843	0.453069	0.504716	0.450319	0.338673	0.604779	0.545169	0.607579	0.622557	0.451681	0.628654	0.608088	0.288271	0.710151	0.47708	0.303182	0.432691	0.56378	0.563722
M_24pcw_MD	0.58506	0.516475	0.685079	0.674395	0.695513	0.476828	0.677073	0.439842	0.507848	0.715713	0.634685	0.579203	0.531921	0.408477	0.515474	0.45908	0.358499	0.518317	0.515421	0.579776	0.589685	0.43376	0.605612	0.547425	0.278428	0.686833	0.42696	0.328888	0.445158	0.581131	0.589472
M_24pcw_STR	0.597422	0.543773	0.755182	0.732406	0.778905	0.443139	0.750535	0.442997	0.519227	0.683757	0.636388	0.612405	0.547921	0.460392	0.518082	0.467844	0.312479	0.573013	0.546551	0.602624	0.609811	0.46212	0.631552	0.5837	0.253255	0.702415	0.430795	0.302948	0.410271	0.557674	0.555892
M_24pcw_A1C	0.599188	0.526605	0.756901	0.750601	0.762315	0.473754	0.756963	0.454272	0.509826	0.662594	0.637864	0.561148	0.545531	0.433496	0.495875	0.451454	0.305892	0.625464	0.538152	0.599593	0.609357	0.452573	0.62341	0.586599	0.285368	0.705306	0.454459	0.29321	0.399065	0.567988	0.568126
M_24pcw_IPC	0.600121	0.518954	0.746929	0.737939	0.755352	0.458076	0.748036	0.454974	0.499337	0.678391	0.642174	0.560087	0.542582	0.423474	0.482139	0.447951	0.321072	0.599547	0.536053	0.594799	0.608674	0.447933	0.622155	0.584601	0.271566	0.706098	0.457758	0.283283	0.383045	0.54657	0.549911
M_24pcw_OFC	0.597156	0.514507	0.722522	0.718342	0.725654	0.446384	0.727944	0.47113	0.496764	0.628514	0.628458	0.572948	0.524404	0.420017	0.486389	0.442019	0.304706	0.563179	0.533038	0.586596	0.600681	0.437422	0.612094	0.573286	0.287971	0.688337	0.444444	0.286135	0.391443	0.544988	0.53839
M_24pcw_STC	0.594871	0.525509	0.719314	0.72283	0.713903	0.471734	0.720421	0.451567	0.497987	0.648305	0.644467	0.576139	0.554868	0.437671	0.477292	0.444812	0.301188	0.570324	0.536032	0.600776	0.588654	0.447516	0.621836	0.55839	0.284713	0.68728	0.463306	0.315406	0.438465	0.555838	0.558519
M_24pcw_ITC	0.60723	0.533083	0.768713	0.758731	0.778193	0.454405	0.771187	0.465724	0.500452	0.656252	0.647377	0.580474	0.546007	0.436739	0.497262	0.447593	0.325931	0.629284	0.542233	0.596032	0.620751	0.460675	0.631058	0.60504	0.286102	0.714486	0.470874	0.279962	0.40203	0.575442	0.564923
M_24pcw_VFC	0.605082	0.532164	0.730278	0.723293	0.73651	0.460484	0.737639	0.447924	0.499791	0.645717	0.655497	0.570307	0.540328	0.44196	0.492016	0.446969	0.300262	0.562953	0.531769	0.597846	0.599513	0.44176	0.620472	0.580596	0.283292	0.699801	0.426315	0.307951	0.418208	0.571774	0.575134
M_24pcw_M1C	0.59732	0.519006	0.73042	0.732819	0.726226	0.471169	0.731287	0.441221	0.506997	0.665862	0.628353	0.5783	0.544734	0.43774	0.495395	0.446971	0.324781	0.552598	0.532857	0.601175	0.615575	0.450472	0.621834	0.595967	0.278762	0.69876	0.439128	0.308926	0.416869	0.569182	0.562177
M_24pcw_MFC	0.607491	0.556459	0.758627	0.752541	0.763801	0.472914	0.761942	0.453598	0.508198	0.623677	0.649786	0.562981	0.538896	0.442099	0.503436	0.451552	0.321093	0.58526	0.531777	0.599466	0.604709	0.450715	0.62695	0.580335	0.274752	0.706605	0.432694	0.296002	0.413752	0.57772	0.569424
M_24pcw_CBC	0.589201	0.516527	0.713053	0.703596	0.722066	0.453832	0.709112	0.449721	0.518008	0.699101	0.620208	0.551459	0.524094	0.448717	0.53496	0.465235	0.376231	0.579195	0.520115	0.587256	0.585765	0.435336	0.610768	0.552007	0.263013	0.674882	0.438456	0.297999	0.401249	0.568048	0.567134
M_24pcw_V1C	0.602838	0.541685	0.755305	0.752427	0.756922	0.474661	0.752858	0.471521	0.512719	0.66097	0.656057	0.576116	0.553354	0.448491	0.493419	0.449585	0.310005	0.607943	0.546335	0.603947	0.590128	0.446242	0.623635	0.556037	0.273171	0.692681	0.451775	0.311594	0.434695	0.556858	0.550222
F_25pcw_A1C	0.577032	0.503806	0.698816	0.719639	0.674219	0.435322	0.696667	0.441805	0.488635	0.649756	0.612011	0.563535	0.52195	0.413991	0.464821	0.443582	0.255362	0.549259	0.546978	0.594676	0.584413	0.422582	0.601688	0.563464	0.267946	0.707178	0.445735	0.323779	0.465654	0.582289	0.618037
F_26pcw_STC	0.586804	0.512566	0.744019	0.733004	0.754698	0.433375	0.748618	0.43752	0.519998	0.612111	0.620015	0.570627	0.532373	0.452461	0.507764	0.447096	0.264237	0.612676	0.521216	0.581635	0.586012	0.441114	0.604763	0.549401	0.250023	0.660433	0.413145	0.276905	0.380389	0.545882	0.534822
F_26pcw_V1C	0.571438	0.506333	0.686365	0.706433	0.662631	0.455082	0.680056	0.422952	0.482318	0.631788	0.631076	0.573973	0.523928	0.407708	0.457262	0.443694	0.255515	0.541338	0.540155	0.583248	0.571193	0.416384	0.59209	0.545193	0.250197	0.69884	0.402737	0.32123	0.452147	0.565727	0.606253
F_26pcw_DFC	0.565961	0.494106	0.682979	0.700074	0.662556	0.420831	0.679177	0.430975	0.490226	0.640765	0.601943	0.56286	0.514622	0.403711	0.460182	0.438597	0.272816	0.517835	0.538575	0.576858	0.56103	0.416702	0.59173	0.533773	0.258781	0.697385	0.410779	0.325042	0.465231	0.566299	0.613199
F_35pcw_CBC	0.565568	0.530936	0.657991	0.680742	0.631338	0.41356	0.657301	0.450568	0.480513	0.600941	0.636959	0.514149	0.545385	0.426842	0.435632	0.431857	0.247195	0.49817	0.48874	0.567856	0.513101	0.409594	0.571445	0.460602	0.253085	0.591343	0.407212	0.303355	0.434355	0.536036	0.5687
F_35pcw_VFC	0.584741	0.540066	0.693174	0.708766	0.6744	0.407177	0.686334	0.457922	0.495063	0.644468	0.645503	0.622915	0.570225	0.419289	0.453422	0.433096	0.26653	0.547494	0.541557	0.602602	0.569567	0.437306	0.615395	0.548912	0.290118	0.696289	0.392845	0.306119	0.438748	0.537917	0.552502
M_37pcw_A1C	0.589531	0.528028	0.736033	0.741881	0.727994	0.450889	0.721423	0.460449	0.50035	0.652651	0.643117	0.622539	0.549389	0.425238	0.492536	0.446907	0.28203	0.573411	0.537842	0.60224	0.597536	0.443466	0.618705	0.578401	0.276604	0.727773	0.476264	0.339016	0.473598	0.581432	0.601885
M_37pcw_OFC	0.586816	0.536931	0.71841	0.721907	0.713021	0.436299	0.707351	0.456055	0.513151	0.654334	0.660856	0.598021	0.557578	0.45052	0.480065	0.447134	0.268468	0.552203	0.54117	0.60449	0.589404	0.439658	0.61603	0.572278	0.276237	0.718652	0.448374	0.330618	0.459618	0.564876	0.588369
M_37pcw_AMY	0.563607	0.523735	0.672515	0.695152	0.645958	0.374018	0.658423	0.44306	0.498118	0.64136	0.644569	0.582419	0.546845	0.426001	0.473831	0.443976	0.297598	0.512492	0.525456	0.578246	0.561976	0.420749	0.588308	0.531112	0.241715	0.677139	0.385028	0.344219	0.483808	0.563249	0.604106
M_37pcw_V1C	0.584962	0.526927	0.709814	0.716723	0.700653	0.446999	0.694758	0.453679	0.5091	0.638551	0.662821	0.599084	0.56275	0.448975	0.474155	0.450668	0.286918	0.551438	0.544163	0.606789	0.589905	0.43691	0.608565	0.566375	0.275404	0.711301	0.453143	0.340299	0.48234	0.557364	0.593763
M_37pcw_MFC	0.585793	0.535597	0.716121	0.726306	0.703305	0.439721	0.704297	0.459249	0.509069	0.646935	0.645762	0.601732	0.548432	0.441498	0.487023	0.448899	0.277842	0.5554	0.540504	0.605117	0.585198	0.445207	0.618081	0.568929	0.283174	0.715166	0.448869	0.335542	0.472884	0.562672	0.593631
M_37pcw_MD	0.548377	0.499227	0.619774	0.640095	0.5959	0.380187	0.600026	0.427563	0.492239	0.6681	0.622009	0.551459	0.514065	0.411078	0.459612	0.43214	0.305988	0.460748	0.49301	0.558196	0.509531	0.402221	0.560679	0.445853	0.238972	0.611425	0.371344	0.357611	0.499414	0.56958	0.620258
M_37pcw_CBC	0.574017	0.521601	0.690355	0.70137	0.676671	0.429595	0.676365	0.460157	0.516326	0.65397	0.636677	0.548269	0.549724	0.453435	0.485423	0.446122	0.309919	0.531032	0.527921	0.592524	0.561997	0.423063	0.594036	0.518934	0.246632	0.642694	0.420837	0.348157	0.476892	0.575487	0.611725
M_37pcw_STR	0.564385	0.526098	0.672503	0.678775	0.664128	0.41088	0.659644	0.446432	0.494416	0.65138	0.641388	0.586391	0.536017	0.42524	0.4624	0.437551	0.29493	0.525821	0.533079	0.586388	0.55184	0.41908	0.583738	0.524491	0.245466	0.660626	0.391189	0.348637	0.492865	0.560233	0.605553
M_37pcw_IPC	0.591263	0.527125	0.734148	0.734408	0.732322	0.441398	0.722841	0.456754	0.507279	0.65984	0.63345	0.597298	0.553632	0.444049	0.490383	0.446997	0.301854	0.572118	0.544394	0.610522	0.599995	0.448911	0.621912	0.583939	0.286117	0.727736	0.451833	0.322383	0.449207	0.566031	0.595286
M_37pcw_ITC	0.59136	0.546006	0.736824	0.739568	0.732233	0.456031	0.725279	0.449353	0.505243	0.66276	0.665611	0.600961	0.567985	0.438108	0.474706	0.443912	0.280457	0.551938	0.548067	0.613434	0.597241	0.444026	0.62426	0.586248	0.282999	0.725012	0.45318	0.327654	0.452228	0.562823	0.594268
M_37pcw_S1C	0.581644	0.528338	0.709304	0.723858	0.691649	0.433313	0.691774	0.451545	0.507968	0.644362	0.643074	0.603877	0.543352	0.420751	0.478973	0.444725	0.285535	0.536688	0.533101	0.600375	0.593364	0.439336	0.612331	0.575361	0.269179	0.7068	0.445597	0.348184	0.473922	0.577563	0.605424
M_37pcw_DFC	0.589125	0.538866	0.714448	0.724946	0.701289	0.452506	0.698429	0.458029	0.508108	0.650765	0.641093	0.596374	0.555827	0.429255	0.478056	0.449539	0.273125	0.544377	0.539101	0.605819	0.593652	0.447236	0.618729	0.578003	0.278885	0.716529	0.46368	0.335284	0.472098	0.564233	0.589711
M_37pcw_STC	0.587387	0.533876	0.720879	0.729443	0.709856	0.431162	0.705394	0.445493	0.506975	0.646303	0.651379	0.598844	0.562028	0.437045	0.476407	0.443065	0.267767	0.539006	0.538463	0.607894	0.596962	0.444457	0.6219	0.581044	0.277307	0.721642	0.447368	0.334935	0.469492	0.570441	0.592845
M_37pcw_M1C	0.579629	0.529541	0.6987	0.713557	0.680731	0.424141	0.687544	0.459902	0.505284	0.64653	0.644787	0.58581	0.552338	0.450028	0.476621	0.442829	0.301342	0.520373	0.535993	0.602558	0.575562	0.432691	0.608329	0.559432	0.278885	0.700056	0.423716	0.355949	0.491314	0.557331	0.598978
M_37pcw_VFC	0.585277	0.536668	0.70367	0.71158	0.693409	0.435186	0.692194	0.458413	0.511322	0.645032	0.659533	0.583717	0.548164	0.441586	0.473173	0.441922	0.263501	0.540298	0.534583	0.599584	0.587997	0.440824	0.61144	0.572868	0.280723	0.710464	0.447788	0.344128	0.480605	0.564012	0.5938
M_37pcw_HIP	0.560109	0.535697	0.667646	0.698006	0.632519	0.381517	0.655958	0.442984	0.494118	0.641937	0.650234	0.565598	0.544113	0.411725	0.452733	0.439208	0.26932	0.502334	0.520683	0.576941	0.515331	0.411676	0.575177	0.472968	0.251436	0.658718	0.396612	0.351567	0.507845	0.557557	0.606957
M_4mos_STC	0.582472	0.509742	0.747189	0.750755	0.741663	0.423751	0.740657	0.462526	0.488889	0.64217	0.605664	0.581679	0.508448	0.413415	0.494869	0.44763	0.294485	0.569458	0.535372	0.588932	0.621418	0.447217	0.625464	0.613855	0.270351	0.74744	0.457035	0.274299	0.384698	0.576057	0.583883
M_4mos_STR	0.57554	0.502889	0.690796	0.678327	0.703201	0.438036	0.680351	0.443494	0.493892	0.645908	0.62902	0.544538	0.539926	0.421858	0.466571	0.442802	0.298034	0.54633	0.55317	0.606182	0.601021	0.447378	0.621534	0.592738	0.259591	0.719168	0.437407	0.313717	0.428125	0.548846	0.567383
M_4mos_V1C	0.604824	0.531871	0.771406	0.7756	0.765131	0.45359	0.764754	0.450188	0.507893	0.672169	0.632822	0.591386	0.541557	0.438687	0.499268	0.456176	0.258158	0.606162	0.560858	0.619535	0.632849	0.461755	0.644177	0.630434	0.284123	0.77153	0.489737	0.299375	0.424142	0.586143	0.596708
M_4mos_CBC	0.573638	0.499692	0.669085	0.693995	0.640009	0.462201	0.65935	0.441676	0.504008	0.584599	0.602236	0.562888	0.522788	0.422179	0.494768	0.442727	0.314007	0.560454	0.509653	0.584385	0.574212	0.429469	0.601335	0.536204	0.254158	0.656635	0.427412	0.325176	0.436154	0.57722	0.588767
M_4mos_HIP	0.591843	0.518831	0.734089	0.729793	0.737326	0.463395	0.732107	0.452325	0.502379	0.639433	0.640897	0.587985	0.53829	0.418303	0.494498	0.458508	0.28399	0.547118	0.554181	0.60727	0.61742	0.444965	0.626007	0.609417	0.269369	0.766068	0.480919	0.299426	0.432711	0.581018	0.603547
M_4mos_MD	0.580972	0.502213	0.701337	0.697159	0.70451	0.451118	0.694893	0.434504	0.502745	0.658323	0.636597	0.525943	0.514417	0.405062	0.50416	0.449975	0.294861	0.553387	0.516924	0.574518	0.599063	0.436339	0.610105	0.567742	0.266519	0.724535	0.450425	0.297749	0.41376	0.582253	0.610364
M_4mos_ITC	0.578301	0.481354	0.742823	0.743885	0.740088	0.411938	0.736649	0.448847	0.486787	0.619343	0.600687	0.586966	0.506677	0.405654	0.498592	0.448347	0.294061	0.574305	0.525138	0.582905	0.628844	0.439818	0.614907	0.612307	0.275203	0.74295	0.453004	0.257505	0.366988	0.570947	0.586853
M_4mos_AMY	0.589112	0.521833	0.722149	0.724797	0.717695	0.426517	0.719645	0.453738	0.506833	0.666279	0.654581	0.606904	0.54837	0.421433	0.495283	0.467522	0.28365	0.569977	0.55512	0.609998	0.602998	0.448805	0.628224	0.597501	0.277098	0.755048	0.459302	0.313084	0.444858	0.581356	0.605502
M_4mos_MFC	0.583314	0.504755	0.733092	0.736091	0.728226	0.427106	0.73094	0.440931	0.489791	0.637362	0.616877	0.579487	0.540079	0.424939	0.492637	0.449789	0.280768	0.560614	0.528437	0.596853	0.617546	0.445659	0.620721	0.599517	0.273521	0.746846	0.455465	0.284485	0.393705	0.56862	0.58093
M_4mos_M1C	0.583139	0.519488	0.711167	0.729003	0.689862	0.412827	0.70684	0.43726	0.494425	0.670812	0.635308	0.565686	0.523753	0.40215	0.476437	0.447484	0.295461	0.556375	0.540483	0.596788	0.581108	0.436338	0.609994	0.550821	0.258275	0.721869	0.428264	0.325631	0.451358	0.578938	0.604346
M_4mos_DFC	0.565397	0.513174	0.66872	0.689263	0.644496	0.397863	0.66175	0.438157	0.492129	0.65991	0.61757	0.582798	0.517061	0.40519	0.462627	0.437176	0.331043	0.487418	0.525146	0.578272	0.577271	0.43168	0.597987	0.539823	0.262395	0.692324	0.429253	0.32065	0.443702	0.558455	0.584384
M_4mos_OFC	0.583184	0.527062	0.708862	0.725509	0.688884	0.390226	0.703276	0.453614	0.497552	0.676836	0.636562	0.58272	0.532276	0.396336	0.463973	0.449594	0.289494	0.524702	0.544422	0.600164	0.586851	0.443296	0.614169	0.564647	0.255078	0.714375	0.421953	0.327711	0.457911	0.578676	0.594267
M_4mos_A1C	0.564604	0.509348	0.669851	0.695055	0.640446	0.40895	0.663318	0.42682	0.491073	0.642521	0.628412	0.583981	0.517899	0.40644	0.457311	0.438195	0.318839	0.495585	0.523202	0.576375	0.576735	0.442468	0.596047	0.546811	0.249411	0.692239	0.406395	0.321769	0.436718	0.574393	0.601732
M_4mos_STC.1	0.566722	0.498642	0.678042	0.70051	0.651661	0.395089	0.669018	0.439042	0.491023	0.659849	0.620442	0.590103	0.528124	0.399418	0.461206	0.436927	0.306275	0.512147	0.529184	0.583407	0.580526	0.442135	0.602336	0.547155	0.253437	0.69758	0.423565	0.313528	0.441909	0.570572	0.597082
M_4mos_VFC	0.577381	0.527566	0.69492	0.713609	0.672702	0.414663	0.688525	0.445133	0.497319	0.664107	0.649389	0.574674	0.536081	0.413287	0.466789	0.444816	0.314966	0.510256	0.535589	0.593245	0.581428	0.432491	0.60741	0.547959	0.267803	0.711508	0.438435	0.330325	0.455934	0.574269	0.59557
M_4mos_ITC.1	0.568892	0.501272	0.687262	0.7042	0.667005	0.402712	0.677704	0.453978	0.48593	0.664431	0.617078	0.599737	0.514832	0.382943	0.468457	0.442398	0.312855	0.501097	0.533392	0.5818	0.584241	0.433725	0.602684	0.549818	0.254861	0.707953	0.431948	0.319476	0.437292	0.572708	0.592258
M_4mos_AMY.1	0.576842	0.528147	0.700095	0.723031	0.673146	0.407213	0.693422	0.440206	0.496923	0.653433	0.640708	0.560743	0.535687	0.414007	0.478785	0.452334	0.311017	0.542277	0.529792	0.586966	0.570185	0.432991	0.603454	0.542747	0.260617	0.698706	0.420799	0.329485	0.457333	0.587308	0.617897
M_4mos_M1C.1	0.585622	0.511773	0.71822	0.73327	0.699995	0.446797	0.711877	0.46649	0.498753	0.664173	0.624606	0.590059	0.537618	0.434307	0.491487	0.45192	0.296169	0.574801	0.550786	0.614616	0.626077	0.448803	0.626038	0.621235	0.285999	0.744103	0.452666	0.314432	0.445625	0.587247	0.589341
M_4mos_MD.1	0.582634	0.50887	0.690614	0.684232	0.696258	0.504577	0.686986	0.436032	0.505744	0.673898	0.643152	0.547063	0.523047	0.410249	0.495203	0.450611	0.332488	0.550116	0.518186	0.576502	0.611398	0.452387	0.618779	0.584633	0.271206	0.72712	0.444264	0.307692	0.419549	0.590874	0.605092
M_4mos_OFC.1	0.581393	0.509763	0.697105	0.714083	0.676784	0.45843	0.690577	0.441973	0.493838	0.654942	0.633586	0.605927	0.546399	0.409629	0.483	0.450118	0.28111	0.544827	0.537051	0.597912	0.617619	0.451597	0.624764	0.602987	0.284264	0.727819	0.443117	0.294374	0.42204	0.567828	0.581063
M_4mos_STR.1	0.578932	0.503591	0.711301	0.708793	0.712599	0.418871	0.704078	0.433009	0.496372	0.67308	0.629996	0.59378	0.5158	0.420629	0.492845	0.454192	0.329283	0.553308	0.542984	0.600709	0.609435	0.450528	0.616899	0.594355	0.260846	0.720811	0.431025	0.309292	0.430501	0.572969	0.58503
M_4mos_STC.2	0.586566	0.50415	0.723153	0.736624	0.706672	0.432155	0.716576	0.445084	0.498505	0.651587	0.631265	0.628869	0.547367	0.41427	0.495244	0.44979	0.310802	0.578896	0.548506	0.606865	0.623079	0.455858	0.627906	0.610087	0.286671	0.747945	0.448762	0.305842	0.4385	0.569456	0.581975
M_4mos_A1C.1	0.593602	0.51539	0.732964	0.746967	0.715872	0.448623	0.725322	0.453868	0.507699	0.647437	0.632695	0.598092	0.54247	0.439176	0.497127	0.45311	0.293464	0.58077	0.545286	0.60657	0.621322	0.446945	0.629914	0.60664	0.291544	0.752575	0.477613	0.304854	0.427263	0.571995	0.585666
M_4mos_HIP.1	0.581655	0.495618	0.695364	0.708304	0.679532	0.415316	0.694655	0.444106	0.499178	0.664809	0.625399	0.594627	0.523278	0.408207	0.491774	0.459459	0.31091	0.547162	0.538767	0.592344	0.59169	0.438344	0.610487	0.565965	0.286091	0.722468	0.452065	0.320258	0.446761	0.583325	0.603574
M_4mos_AMY.2	0.596311	0.516999	0.731945	0.743117	0.717999	0.428801	0.73435	0.450061	0.507783	0.662502	0.654774	0.593062	0.538518	0.418714	0.501568	0.458254	0.283576	0.557687	0.550823	0.612752	0.625019	0.45346	0.631456	0.617354	0.283149	0.751987	0.457397	0.315557	0.447393	0.592745	0.605941
M_4mos_MFC.1	0.58915	0.512303	0.738234	0.748115	0.72571	0.432654	0.735713	0.458209	0.501022	0.664047	0.631191	0.593947	0.549176	0.426043	0.490406	0.454959	0.26887	0.572448	0.557093	0.613773	0.631475	0.455382	0.63285	0.626152	0.291358	0.756397	0.481463	0.304851	0.433196	0.585695	0.590066
M_4mos_V1C.1	0.605049	0.520195	0.752906	0.766181	0.736581	0.461809	0.744916	0.463368	0.506955	0.671321	0.64102	0.600439	0.548687	0.440286	0.505141	0.46162	0.277268	0.612771	0.556583	0.618907	0.627395	0.458557	0.637736	0.613436	0.285287	0.765269	0.478658	0.308433	0.441248	0.581787	0.585369
M_4mos_ITC.2	0.592862	0.50539	0.734406	0.738866	0.727913	0.433996	0.732727	0.444557	0.500745	0.660049	0.628562	0.608574	0.542191	0.424819	0.495392	0.451439	0.293727	0.585573	0.550987	0.614352	0.629471	0.460377	0.629163	0.623954	0.295628	0.750824	0.454816	0.302994	0.429363	0.579364	0.585832
M_4mos_S1C	0.590142	0.506618	0.725196	0.738238	0.709188	0.456856	0.723984	0.444206	0.497539	0.660243	0.63246	0.593876	0.546351	0.429424	0.494529	0.451895	0.28313	0.563172	0.547829	0.606265	0.632025	0.458395	0.631915	0.632511	0.286428	0.751672	0.465391	0.309111	0.43986	0.584978	0.589225
M_4mos_IPC	0.593207	0.513839	0.733398	0.745352	0.718582	0.455622	0.729012	0.459364	0.506146	0.662937	0.636794	0.608071	0.54103	0.414676	0.494713	0.444978	0.267146	0.580892	0.548281	0.612267	0.630101	0.452147	0.635691	0.621941	0.294496	0.752578	0.487266	0.304613	0.423994	0.581765	0.588619
M_4mos_CBC.1	0.588828	0.527742	0.704315	0.723369	0.681673	0.476328	0.698497	0.450518	0.508348	0.618034	0.629583	0.554024	0.547506	0.43693	0.486427	0.454399	0.29788	0.573363	0.534655	0.603774	0.589287	0.436909	0.61373	0.563732	0.270335	0.677763	0.448426	0.320463	0.453893	0.589377	0.607555
M_4mos_DFC.1	0.591051	0.513893	0.733927	0.739952	0.725696	0.431958	0.732895	0.446486	0.49613	0.670435	0.636029	0.592541	0.549795	0.43402	0.495316	0.448412	0.274014	0.553127	0.555303	0.611369	0.638727	0.462491	0.637523	0.638041	0.297392	0.754212	0.459504	0.299566	0.435714	0.571783	0.570773
M_4mos_VFC.1	0.594231	0.521077	0.72666	0.734591	0.716327	0.447708	0.725733	0.461214	0.505943	0.665001	0.646521	0.600125	0.538027	0.436477	0.496613	0.450097	0.308223	0.580487	0.54856	0.610153	0.623409	0.452636	0.629198	0.615855	0.29027	0.752326	0.478488	0.304912	0.432424	0.579469	0.574705
M_10mos_S1C	0.581633	0.518172	0.681189	0.708206	0.649747	0.476772	0.676047	0.436435	0.490402	0.633551	0.609734	0.601709	0.523941	0.420963	0.489926	0.443844	0.276835	0.536104	0.535067	0.595152	0.625288	0.440246	0.616071	0.608824	0.257015	0.729366	0.432408	0.296799	0.410315	0.570922	0.582506
M_10mos_IPC	0.57748	0.51766	0.691476	0.712047	0.667174	0.46735	0.692454	0.447713	0.499737	0.615182	0.628201	0.584636	0.541731	0.43422	0.490576	0.450862	0.288521	0.534249	0.542441	0.600758	0.607921	0.436292	0.61382	0.585176	0.257855	0.720939	0.45082	0.302461	0.424567	0.571124	0.588212
M_10mos_STC	0.582006	0.513966	0.69919	0.719441	0.675227	0.446089	0.6942	0.446145	0.495793	0.642893	0.622017	0.589934	0.533058	0.43038	0.492835	0.452663	0.258405	0.536262	0.545844	0.600286	0.608759	0.442811	0.619364	0.58668	0.268248	0.740026	0.445603	0.311938	0.425277	0.57453	0.591989
M_10mos_DFC	0.579755	0.514389	0.680265	0.704408	0.652018	0.475227	0.677326	0.431868	0.488918	0.630014	0.604331	0.587054	0.521608	0.410853	0.487357	0.45335	0.276201	0.533347	0.529833	0.591056	0.614667	0.442647	0.61374	0.595504	0.263676	0.719591	0.469356	0.297297	0.406122	0.567723	0.578797
M_10mos_OFC	0.583672	0.511141	0.697529	0.720323	0.670745	0.453707	0.693761	0.444014	0.494891	0.644682	0.605463	0.594027	0.525817	0.413028	0.492506	0.45611	0.268283	0.546674	0.542374	0.601638	0.613519	0.455421	0.620341	0.589869	0.2701	0.734563	0.441263	0.297851	0.412275	0.570718	0.580974
M_10mos_MFC	0.589105	0.533085	0.726111	0.739897	0.709276	0.439887	0.722724	0.457623	0.506795	0.637957	0.648605	0.584992	0.549311	0.433662	0.505203	0.46108	0.27342	0.582473	0.556761	0.607705	0.623764	0.455055	0.627085	0.614854	0.272915	0.749572	0.480518	0.308926	0.425855	0.575009	0.596974
M_10mos_CBC	0.583708	0.533511	0.727705	0.737185	0.71565	0.491757	0.731908	0.446582	0.50318	0.531753	0.611765	0.527862	0.538576	0.442012	0.484163	0.43221	0.271572	0.602827	0.545464	0.592548	0.580839	0.427285	0.603537	0.559976	0.239493	0.666991	0.432427	0.310509	0.439806	0.578394	0.583246
M_10mos_ITC	0.575989	0.506087	0.697019	0.718724	0.671445	0.479511	0.694692	0.45237	0.483273	0.63545	0.621851	0.587347	0.538683	0.403103	0.471986	0.447548	0.261973	0.533179	0.541917	0.601075	0.611628	0.450083	0.622189	0.592976	0.272259	0.734686	0.432537	0.289979	0.412	0.552111	0.572039
M_10mos_MD	0.560671	0.497581	0.63544	0.635916	0.633581	0.478128	0.630928	0.418243	0.49417	0.646417	0.627122	0.542384	0.524203	0.407072	0.491985	0.451687	0.265864	0.506931	0.522716	0.573833	0.58389	0.42367	0.593514	0.546681	0.254938	0.678131	0.425208	0.299913	0.42966	0.569168	0.59594
M_10mos_V1C	0.586323	0.518811	0.720309	0.733692	0.703932	0.4664	0.712697	0.448822	0.500282	0.634915	0.62408	0.596967	0.534014	0.429525	0.502273	0.453403	0.238105	0.576624	0.551269	0.606716	0.62361	0.446649	0.625668	0.611084	0.264246	0.741619	0.454797	0.282737	0.41474	0.575891	0.579857
F_1yrs_AMY	0.596402	0.517888	0.754536	0.755033	0.752404	0.40987	0.751714	0.46177	0.512492	0.664915	0.633275	0.556681	0.533489	0.433697	0.51606	0.467805	0.282649	0.565088	0.556795	0.612264	0.639696	0.456307	0.637013	0.642111	0.286195	0.786466	0.495539	0.313254	0.444546	0.609053	0.628353
F_1yrs_M1C	0.598198	0.527623	0.774782	0.777478	0.770164	0.449572	0.768053	0.441821	0.502554	0.667623	0.629146	0.559638	0.543104	0.443066	0.502717	0.456425	0.287263	0.622516	0.55144	0.618954	0.645885	0.456675	0.635261	0.651006	0.309854	0.777273	0.480729	0.306699	0.425254	0.610054	0.627196
F_1yrs_DFC	0.603557	0.531301	0.774311	0.77691	0.769802	0.440979	0.76899	0.457555	0.514318	0.670884	0.629124	0.552482	0.537672	0.448153	0.509434	0.457994	0.301962	0.606085	0.558043	0.619923	0.645208	0.467242	0.643304	0.647202	0.281354	0.784735	0.503139	0.303574	0.428305	0.611086	0.617079
F_1yrs_STC	0.605123	0.53041	0.782161	0.783888	0.778605	0.441487	0.777169	0.46289	0.514307	0.667832	0.630107	0.553213	0.532096	0.428632	0.519109	0.462817	0.286548	0.608694	0.557785	0.618496	0.649293	0.468993	0.645636	0.650256	0.274562	0.78263	0.489404	0.296432	0.431926	0.609942	0.621546
F_1yrs_V1C	0.607824	0.535104	0.784266	0.791001	0.775141	0.474953	0.773509	0.466955	0.509808	0.679984	0.633412	0.563205	0.527682	0.425661	0.521908	0.465191	0.284762	0.622749	0.553426	0.617254	0.64519	0.460805	0.642924	0.636731	0.27525	0.785581	0.50992	0.297996	0.414366	0.616854	0.62376
F_1yrs_MFC	0.599343	0.516547	0.769474	0.767568	0.769981	0.431983	0.766199	0.461096	0.512226	0.66336	0.62357	0.547883	0.539236	0.425285	0.512004	0.464469	0.328864	0.61652	0.555803	0.615668	0.647029	0.466804	0.640454	0.65159	0.26919	0.788274	0.474532	0.306165	0.431922	0.611079	0.625963
F_1yrs_OFC	0.598805	0.531253	0.755708	0.759906	0.749461	0.427489	0.749911	0.45883	0.511318	0.676435	0.634165	0.563375	0.540708	0.43255	0.507603	0.464832	0.293855	0.56932	0.557562	0.61876	0.633825	0.463087	0.639391	0.629714	0.272679	0.779438	0.473094	0.316692	0.444929	0.603376	0.620384
F_1yrs_ITC	0.60367	0.520742	0.777626	0.781518	0.771673	0.434165	0.771693	0.462454	0.513627	0.672367	0.624681	0.57446	0.541315	0.430616	0.517752	0.466521	0.284427	0.620826	0.555539	0.616766	0.655997	0.468093	0.642155	0.657072	0.280845	0.784284	0.500642	0.303237	0.431849	0.608773	0.623749
F_1yrs_S1C	0.605519	0.527535	0.781325	0.784684	0.775959	0.450725	0.773555	0.471282	0.514113	0.679107	0.621238	0.572501	0.54204	0.437281	0.521393	0.459838	0.28091	0.594954	0.558529	0.621356	0.656456	0.46918	0.643273	0.66408	0.275517	0.78456	0.49901	0.300604	0.434388	0.609193	0.626449
F_1yrs_VFC	0.603456	0.521857	0.777866	0.780801	0.772976	0.419449	0.772592	0.4737	0.515449	0.673098	0.621908	0.560579	0.535278	0.433622	0.521957	0.463657	0.274295	0.618806	0.555234	0.617482	0.653842	0.470117	0.642302	0.658206	0.287412	0.783128	0.493555	0.30299	0.430454	0.615032	0.625203
F_1yrs_CBC	0.586998	0.51807	0.735088	0.745887	0.721551	0.488585	0.738237	0.455066	0.507676	0.557738	0.603463	0.539918	0.530654	0.439888	0.501163	0.44326	0.323876	0.632431	0.534532	0.597392	0.604215	0.44343	0.617005	0.582095	0.267189	0.713383	0.451461	0.329122	0.441381	0.605479	0.623108
F_1yrs_A1C	0.600843	0.519373	0.781558	0.785137	0.775945	0.446359	0.773312	0.4651	0.507689	0.666633	0.623881	0.559614	0.531579	0.430308	0.518717	0.462865	0.267414	0.593382	0.558073	0.618116	0.647011	0.460186	0.640348	0.648552	0.288794	0.782394	0.50135	0.309071	0.428442	0.613368	0.622422
F_1yrs_MD	0.584133	0.504786	0.723813	0.714512	0.732631	0.452489	0.719728	0.436341	0.510268	0.67941	0.657164	0.535173	0.508949	0.412649	0.522754	0.465146	0.317156	0.58457	0.530925	0.589919	0.614146	0.442815	0.618308	0.589808	0.278417	0.753792	0.474162	0.303404	0.414752	0.607604	0.636483
F_1yrs_HIP	0.595248	0.514853	0.747852	0.743985	0.750582	0.44963	0.74438	0.45291	0.516986	0.643659	0.626429	0.555074	0.528406	0.420119	0.52002	0.470609	0.284984	0.587018	0.547814	0.60258	0.635052	0.450467	0.630177	0.62906	0.280322	0.782051	0.481793	0.320411	0.445368	0.60675	0.639713
F_1yrs_IPC	0.600164	0.524478	0.773425	0.776971	0.767866	0.447328	0.766155	0.464856	0.511484	0.672182	0.622022	0.576557	0.535696	0.425836	0.513979	0.460115	0.298748	0.614101	0.554197	0.616501	0.651091	0.468222	0.640885	0.64627	0.292149	0.777267	0.497213	0.292758	0.420638	0.610607	0.623636
F_1yrs_STR	0.590886	0.507064	0.740719	0.722783	0.759096	0.428241	0.739427	0.454165	0.503557	0.665609	0.626205	0.553006	0.521723	0.428935	0.499853	0.460111	0.325577	0.579542	0.55291	0.609632	0.639055	0.458998	0.629418	0.638179	0.264507	0.761859	0.472394	0.306021	0.413094	0.576116	0.593664
F_2yrs_VFC	0.560836	0.495562	0.631036	0.644719	0.614513	0.396328	0.625704	0.407855	0.483848	0.6111	0.619783	0.559853	0.518709	0.40645	0.426398	0.419878	0.268102	0.487467	0.527675	0.571037	0.546995	0.41267	0.577409	0.521255	0.26847	0.662971	0.41294	0.355594	0.505183	0.538761	0.592149
F_2yrs_IPC	0.564584	0.491885	0.664303	0.674088	0.652041	0.40723	0.660619	0.391617	0.474767	0.621313	0.631787	0.532694	0.496976	0.389622	0.424803	0.41826	0.269065	0.517451	0.528146	0.562662	0.547686	0.407499	0.575804	0.522534	0.246571	0.674174	0.384245	0.321078	0.456766	0.536396	0.588852
F_2yrs_S1C	0.559328	0.490466	0.64691	0.664005	0.626563	0.404493	0.635487	0.401773	0.481735	0.601275	0.614577	0.550008	0.518532	0.404294	0.426174	0.417738	0.284727	0.50821	0.525793	0.569859	0.535717	0.409892	0.574114	0.501341	0.260306	0.663188	0.402083	0.350401	0.500977	0.537235	0.589461
F_2yrs_ITC	0.561674	0.484878	0.665578	0.670756	0.658432	0.421522	0.663438	0.394499	0.475503	0.625091	0.622944	0.558757	0.506922	0.388254	0.423342	0.415342	0.246189	0.530103	0.524336	0.566227	0.55202	0.405671	0.572893	0.538528	0.267882	0.681441	0.423511	0.333821	0.469435	0.532879	0.584984
F_2yrs_MD	0.554946	0.482023	0.623515	0.649509	0.593331	0.433762	0.608334	0.394134	0.468284	0.632666	0.620149	0.523892	0.484574	0.382154	0.416886	0.41358	0.285541	0.51859	0.505997	0.547062	0.508444	0.394346	0.55815	0.467219	0.25122	0.617019	0.390069	0.343889	0.47963	0.540785	0.598151
F_2yrs_DFC	0.558684	0.496337	0.638601	0.663649	0.609436	0.416395	0.630967	0.414191	0.477121	0.609223	0.62476	0.575934	0.507366	0.395729	0.435552	0.419456	0.293281	0.50419	0.519746	0.566324	0.557545	0.406214	0.571452	0.523865	0.26755	0.666216	0.408749	0.342385	0.485328	0.54679	0.58924
F_2yrs_MFC	0.558085	0.482182	0.667338	0.683402	0.648093	0.391401	0.658563	0.407999	0.47539	0.616252	0.614103	0.544112	0.494753	0.386464	0.433255	0.416352	0.281027	0.518925	0.529514	0.567973	0.550628	0.414185	0.578524	0.52759	0.26174	0.679256	0.410132	0.32601	0.485923	0.525303	0.581821
F_2yrs_CBC	0.566699	0.487054	0.643901	0.668932	0.614744	0.447661	0.64646	0.417894	0.482944	0.557782	0.596867	0.515349	0.517527	0.43192	0.451489	0.428016	0.307365	0.560581	0.532925	0.583725	0.55555	0.415988	0.584887	0.526053	0.264654	0.658364	0.422544	0.324857	0.466776	0.560391	0.588729
F_2yrs_HIP	0.547936	0.487328	0.618198	0.638995	0.593798	0.375554	0.609558	0.392333	0.47359	0.605835	0.615082	0.54265	0.505612	0.393028	0.433513	0.42162	0.279521	0.472971	0.518138	0.553783	0.527059	0.403956	0.565173	0.497007	0.272427	0.646451	0.408754	0.336527	0.483738	0.543233	0.591049
F_2yrs_OFC	0.567501	0.494883	0.655435	0.662157	0.646595	0.414064	0.650221	0.39033	0.484886	0.630466	0.619705	0.544612	0.503546	0.380255	0.441595	0.422667	0.298459	0.505999	0.526064	0.571273	0.569288	0.42481	0.584708	0.552302	0.269815	0.687005	0.429006	0.326083	0.489056	0.549456	0.577445
F_2yrs_V1C	0.569615	0.501146	0.654599	0.672938	0.632853	0.439292	0.644286	0.404051	0.482476	0.638792	0.628852	0.5714	0.512765	0.407512	0.440823	0.425531	0.292998	0.525955	0.521639	0.575262	0.546781	0.415384	0.584611	0.5204	0.272632	0.68323	0.419992	0.342559	0.493413	0.539299	0.597415
F_2yrs_STC	0.56198	0.488654	0.659256	0.679703	0.63516	0.40416	0.654823	0.423015	0.475684	0.580663	0.612928	0.548201	0.495699	0.391342	0.4262	0.419438	0.299744	0.515083	0.528609	0.565614	0.541173	0.411079	0.573061	0.509204	0.242348	0.665713	0.371786	0.327379	0.471599	0.540533	0.601225
F_3yrs_STR	0.556309	0.493146	0.652003	0.653975	0.648447	0.406074	0.64847	0.421355	0.480013	0.621437	0.626737	0.580533	0.521713	0.400596	0.447898	0.427577	0.298616	0.500969	0.532517	0.580183	0.540661	0.417062	0.58412	0.507141	0.237217	0.661299	0.378595	0.347811	0.487047	0.556378	0.60508
F_3yrs_STC	0.575194	0.518017	0.685343	0.698841	0.668912	0.484421	0.676964	0.438207	0.505119	0.652578	0.627202	0.574892	0.52896	0.405372	0.469482	0.441691	0.316383	0.522659	0.538248	0.600094	0.592052	0.440444	0.606633	0.573615	0.267597	0.725354	0.426768	0.34283	0.471021	0.580756	0.607595
F_3yrs_IPC	0.569424	0.490922	0.674093	0.688551	0.65662	0.407365	0.664135	0.434367	0.489642	0.645644	0.607971	0.576318	0.504073	0.398567	0.471163	0.439689	0.311529	0.523409	0.518759	0.582893	0.596355	0.436738	0.600618	0.581492	0.2646	0.713966	0.412892	0.328648	0.444902	0.574802	0.603585
F_3yrs_ITC	0.570044	0.50002	0.685696	0.700109	0.668247	0.405949	0.677391	0.436196	0.487997	0.66092	0.626303	0.578025	0.527041	0.404049	0.467722	0.439247	0.325269	0.50547	0.5253	0.592046	0.587677	0.437325	0.602711	0.576024	0.260935	0.717395	0.400479	0.329477	0.460969	0.563909	0.605658
F_3yrs_CBC	0.577558	0.524588	0.710191	0.72116	0.696517	0.474764	0.708405	0.449496	0.486859	0.527	0.636321	0.511093	0.5309	0.419399	0.443694	0.426931	0.320106	0.597197	0.540001	0.591984	0.563428	0.432764	0.604206	0.535864	0.249979	0.680046	0.402692	0.326494	0.455309	0.572784	0.594611
F_3yrs_AMY	0.560409	0.494333	0.660647	0.66943	0.649507	0.423929	0.656979	0.42734	0.48163	0.612558	0.602536	0.582181	0.513398	0.390467	0.458586	0.435615	0.303948	0.493624	0.523141	0.570396	0.572302	0.425622	0.589646	0.555166	0.259178	0.678832	0.403147	0.342114	0.464673	0.569693	0.619134
F_3yrs_VFC	0.565781	0.495306	0.65651	0.670767	0.639297	0.405339	0.648918	0.436338	0.484257	0.646739	0.601376	0.585352	0.498145	0.398172	0.477551	0.44183	0.325594	0.498364	0.519742	0.581211	0.58882	0.42979	0.59583	0.567708	0.257397	0.706786	0.427561	0.328463	0.442444	0.561103	0.602233
F_3yrs_M1C	0.573365	0.496706	0.68616	0.700929	0.668316	0.433904	0.679562	0.431441	0.48986	0.654693	0.610394	0.584409	0.514026	0.399987	0.478102	0.446176	0.319629	0.51462	0.527627	0.588335	0.596348	0.439583	0.603524	0.571969	0.260791	0.722257	0.420162	0.322117	0.451485	0.575918	0.596407
F_3yrs_A1C	0.571095	0.505771	0.666612	0.674784	0.656138	0.434822	0.659719	0.437479	0.501017	0.623069	0.629779	0.567199	0.527679	0.409528	0.471342	0.440889	0.305202	0.491375	0.531227	0.597282	0.584703	0.433662	0.605053	0.561154	0.270172	0.725045	0.433875	0.343024	0.484461	0.568112	0.59549
F_3yrs_MD	0.565723	0.502591	0.653906	0.65649	0.649666	0.457839	0.638447	0.420628	0.499069	0.655505	0.641959	0.556437	0.537892	0.395787	0.462639	0.440345	0.295038	0.517821	0.532889	0.582164	0.540767	0.423925	0.595764	0.499002	0.253563	0.67189	0.391182	0.354054	0.49748	0.576248	0.617443
F_3yrs_V1C	0.574357	0.512405	0.693872	0.707448	0.677336	0.408558	0.685776	0.429553	0.497793	0.662779	0.627341	0.574074	0.521073	0.413996	0.46943	0.445085	0.28798	0.532881	0.534418	0.595897	0.58689	0.436477	0.610659	0.56052	0.26481	0.729643	0.424418	0.32847	0.459622	0.564912	0.610532
M_3yrs_OFC	0.576467	0.508426	0.702305	0.714768	0.686988	0.395054	0.694072	0.428175	0.491195	0.655468	0.624977	0.583927	0.534611	0.413813	0.471021	0.444442	0.279411	0.542838	0.54926	0.592805	0.588538	0.425639	0.60341	0.569569	0.261092	0.717178	0.44281	0.329417	0.479406	0.5794	0.609463
M_3yrs_MFC	0.571953	0.504912	0.685461	0.700228	0.66762	0.428015	0.683975	0.432036	0.487142	0.646168	0.613323	0.561283	0.508139	0.410257	0.464964	0.439276	0.251759	0.536017	0.530494	0.583166	0.57418	0.424951	0.593669	0.549014	0.263169	0.695974	0.426301	0.332752	0.479057	0.579946	0.610852
M_3yrs_M1C	0.565716	0.496652	0.672961	0.69746	0.644335	0.435367	0.670042	0.414796	0.482089	0.615843	0.603854	0.583096	0.513388	0.387558	0.45868	0.44088	0.302551	0.510449	0.528762	0.582755	0.5763	0.424848	0.588247	0.551038	0.257941	0.690288	0.398541	0.32859	0.474565	0.571557	0.604514
M_3yrs_S1C	0.572854	0.518735	0.674671	0.700414	0.644658	0.423075	0.66955	0.426763	0.488536	0.643807	0.620208	0.585308	0.531925	0.40807	0.449065	0.438569	0.293851	0.52585	0.545141	0.59401	0.573854	0.422221	0.592599	0.549025	0.264832	0.693479	0.41666	0.335847	0.476383	0.569822	0.613023
M_3yrs_STC	0.570535	0.497113	0.694894	0.713053	0.673265	0.402511	0.688395	0.425302	0.487076	0.651717	0.596038	0.585876	0.516363	0.405139	0.469734	0.438365	0.294058	0.547542	0.538707	0.583394	0.572542	0.432409	0.594728	0.542314	0.265806	0.704496	0.434251	0.319395	0.452037	0.579713	0.614451
M_3yrs_IPC	0.574193	0.526965	0.678713	0.702742	0.650595	0.419261	0.672545	0.421022	0.490865	0.647881	0.619074	0.594429	0.52782	0.401306	0.449665	0.440766	0.265283	0.528331	0.538448	0.584837	0.566265	0.421195	0.594619	0.535315	0.25843	0.696033	0.438725	0.33224	0.477904	0.579686	0.615401
M_3yrs_A1C	0.57061	0.501213	0.687863	0.701372	0.671414	0.400533	0.682156	0.43035	0.486282	0.640847	0.6069	0.580781	0.516551	0.390597	0.456518	0.439468	0.262851	0.519928	0.540129	0.586858	0.579069	0.430115	0.598863	0.553286	0.246293	0.708624	0.42507	0.32355	0.48015	0.57834	0.608602
M_3yrs_CBC	0.583098	0.51516	0.71847	0.726217	0.708359	0.470176	0.720805	0.432546	0.485248	0.520017	0.600306	0.521624	0.52645	0.43666	0.45875	0.434347	0.290951	0.617151	0.536608	0.596054	0.585303	0.43332	0.609688	0.556924	0.267095	0.679785	0.434901	0.321521	0.451995	0.588302	0.610753
M_3yrs_V1C	0.571407	0.506187	0.686367	0.70644	0.662629	0.455083	0.680059	0.422713	0.482331	0.631788	0.631083	0.573968	0.523925	0.407735	0.457001	0.4437	0.255504	0.541337	0.540024	0.583247	0.57117	0.416367	0.59209	0.545158	0.250197	0.698842	0.402743	0.321232	0.452188	0.565784	0.606333
M_3yrs_AMY	0.565982	0.494086	0.682981	0.700071	0.662564	0.420844	0.679181	0.430992	0.490254	0.64077	0.601947	0.562872	0.514637	0.403709	0.460194	0.438652	0.272842	0.517853	0.538589	0.576895	0.561038	0.416723	0.591734	0.533783	0.258848	0.697387	0.410796	0.325102	0.465135	0.566289	0.613174
M_3yrs_VFC	0.576102	0.519437	0.677807	0.692315	0.660269	0.409749	0.667377	0.425845	0.493671	0.649126	0.624031	0.578975	0.537689	0.406884	0.448297	0.439807	0.263858	0.517941	0.549297	0.589352	0.573329	0.433428	0.599114	0.549524	0.261069	0.701435	0.429238	0.342758	0.488378	0.573854	0.607114
M_3yrs_DFC	0.577385	0.511912	0.714168	0.722632	0.703269	0.428235	0.706983	0.429089	0.49758	0.66542	0.623054	0.585401	0.534479	0.412818	0.474251	0.442181	0.282507	0.545144	0.547013	0.592151	0.58515	0.426495	0.608987	0.567337	0.266771	0.730296	0.434636	0.327312	0.469905	0.573676	0.608486
M_3yrs_HIP	0.566399	0.494348	0.670031	0.67943	0.658185	0.415955	0.664582	0.415698	0.481697	0.614036	0.598059	0.553244	0.519056	0.405751	0.457218	0.429707	0.26691	0.523875	0.526275	0.561211	0.567853	0.419116	0.589834	0.53914	0.251076	0.678276	0.403326	0.313978	0.456929	0.559658	0.6071
M_3yrs_ITC	0.577032	0.503799	0.698816	0.719637	0.67422	0.435339	0.696669	0.441833	0.487875	0.649754	0.612018	0.563535	0.521958	0.414017	0.464838	0.443644	0.25538	0.549263	0.54704	0.594681	0.58442	0.4226	0.601695	0.56347	0.267969	0.707178	0.445752	0.323801	0.46561	0.582225	0.617936
M_4yrs_AMY	0.561637	0.492188	0.624407	0.647983	0.596908	0.399442	0.62011	0.423459	0.484821	0.593038	0.618491	0.570388	0.528826	0.397149	0.4686	0.443078	0.258094	0.474659	0.521878	0.584909	0.584474	0.430619	0.590334	0.559914	0.26893	0.701694	0.410722	0.318995	0.44124	0.552053	0.580435
M_4yrs_STR	0.553069	0.483412	0.628593	0.636678	0.618295	0.410015	0.6156	0.416432	0.48452	0.616689	0.605107	0.564797	0.520156	0.392472	0.46064	0.43639	0.275899	0.471106	0.519239	0.581595	0.577989	0.425468	0.593276	0.545846	0.263056	0.687405	0.43309	0.313224	0.418783	0.540521	0.572543
M_4yrs_VFC	0.558844	0.483484	0.654334	0.670479	0.635027	0.3993	0.645227	0.433734	0.477369	0.602548	0.614682	0.591542	0.514419	0.389017	0.478431	0.440164	0.303757	0.529636	0.517995	0.576316	0.59162	0.428143	0.594231	0.573207	0.287663	0.711082	0.437854	0.299711	0.411823	0.568988	0.5923
M_4yrs_DFC	0.5512	0.476454	0.608031	0.624377	0.588598	0.426286	0.60226	0.423976	0.476557	0.586776	0.606998	0.566118	0.514525	0.393691	0.458586	0.434083	0.256174	0.481413	0.508802	0.573335	0.569375	0.414405	0.583474	0.537511	0.257632	0.689982	0.396572	0.327217	0.441715	0.535028	0.560959
M_4yrs_STC	0.558997	0.468495	0.632275	0.650494	0.610709	0.402477	0.624428	0.424488	0.478604	0.58521	0.590342	0.58247	0.499086	0.385242	0.475678	0.439143	0.307365	0.477334	0.51205	0.57674	0.590319	0.422924	0.590181	0.566101	0.272105	0.697618	0.445068	0.312586	0.414557	0.556008	0.575258
M_4yrs_CBC	0.549287	0.486617	0.617347	0.644125	0.586306	0.457091	0.611011	0.405825	0.480893	0.531628	0.606329	0.513092	0.522486	0.395337	0.450669	0.428284	0.284411	0.518507	0.505292	0.571297	0.547427	0.406938	0.582218	0.502231	0.254993	0.644482	0.437537	0.329254	0.450485	0.559871	0.577992
M_4yrs_MD	0.560507	0.482231	0.641245	0.6505	0.629619	0.439922	0.627824	0.416337	0.495365	0.645582	0.642834	0.564764	0.507726	0.384148	0.492049	0.450435	0.293082	0.537043	0.508934	0.572548	0.570695	0.427307	0.592553	0.534887	0.275135	0.68995	0.455612	0.315656	0.42752	0.575562	0.60626
M_8yrs_ITC	0.557242	0.464647	0.643112	0.672069	0.609595	0.40507	0.631716	0.428978	0.481764	0.612732	0.595965	0.593156	0.50411	0.382752	0.475048	0.435867	0.321395	0.511891	0.509868	0.565297	0.572158	0.427065	0.588825	0.541016	0.272969	0.712797	0.455449	0.306774	0.428337	0.567275	0.599884
M_8yrs_S1C	0.559533	0.478437	0.623735	0.653738	0.589096	0.403464	0.60807	0.417475	0.479651	0.610407	0.621565	0.58379	0.523243	0.398862	0.478205	0.430391	0.309454	0.494116	0.512721	0.575072	0.588105	0.432994	0.591198	0.558109	0.265613	0.710782	0.424512	0.324908	0.448193	0.554479	0.58604
M_8yrs_IPC	0.557622	0.494463	0.629186	0.660385	0.593207	0.386363	0.616989	0.399611	0.484365	0.613626	0.610461	0.600731	0.514268	0.423967	0.47768	0.434833	0.29793	0.502172	0.506905	0.570917	0.596919	0.427471	0.587943	0.56971	0.275384	0.71106	0.427519	0.316513	0.440782	0.566467	0.60294
M_8yrs_V1C	0.564681	0.488124	0.66092	0.691771	0.62526	0.409007	0.644719	0.428711	0.48801	0.628684	0.619594	0.5998	0.510828	0.40243	0.477638	0.443112	0.304994	0.533364	0.522519	0.582289	0.597614	0.442021	0.602316	0.568923	0.274273	0.731249	0.454552	0.319339	0.437827	0.578987	0.60731
M_8yrs_STC	0.556221	0.467254	0.640975	0.671639	0.605566	0.434988	0.629441	0.428271	0.478807	0.621344	0.603168	0.585712	0.511999	0.391096	0.478324	0.440983	0.290612	0.509302	0.512193	0.57181	0.588312	0.433147	0.594421	0.559795	0.270904	0.718045	0.453796	0.319253	0.433527	0.55917	0.596352
M_8yrs_MD	0.567877	0.488753	0.681317	0.683011	0.678008	0.460793	0.675193	0.429814	0.503911	0.657715	0.628192	0.52863	0.51802	0.403316	0.506933	0.4563	0.302878	0.579374	0.510271	0.56919	0.577941	0.430298	0.603388	0.544291	0.263761	0.729824	0.443061	0.323155	0.449682	0.582123	0.625845
M_8yrs_VFC	0.558453	0.472367	0.64643	0.669521	0.619423	0.383881	0.637269	0.42544	0.490131	0.615813	0.611518	0.597133	0.523115	0.421906	0.478727	0.437309	0.298898	0.528303	0.510964	0.575972	0.582737	0.436261	0.600155	0.556798	0.269621	0.721889	0.444866	0.320169	0.438935	0.550569	0.595681
M_8yrs_HIP	0.573383	0.491194	0.69232	0.70005	0.682282	0.434001	0.68349	0.433745	0.504874	0.625159	0.607531	0.558829	0.540621	0.417625	0.488488	0.450607	0.321126	0.559846	0.531554	0.582681	0.603184	0.440477	0.61843	0.582754	0.256355	0.749784	0.449917	0.31995	0.447501	0.588985	0.617296
M_8yrs_AMY	0.57016	0.479303	0.671956	0.693293	0.646844	0.397903	0.670234	0.42825	0.489192	0.630514	0.604771	0.574842	0.511366	0.401883	0.486962	0.449624	0.313758	0.544128	0.525064	0.582736	0.58788	0.439008	0.608855	0.556756	0.257671	0.730839	0.444333	0.330379	0.457067	0.585469	0.628585
M_8yrs_M1C	0.557653	0.475443	0.625628	0.65408	0.592708	0.431486	0.616783	0.425233	0.48699	0.573586	0.597656	0.574162	0.515494	0.409315	0.475108	0.434084	0.309536	0.510148	0.511193	0.574044	0.579636	0.42097	0.591422	0.547154	0.286317	0.711941	0.451823	0.330965	0.463147	0.565808	0.604692
M_8yrs_CBC	0.565034	0.520178	0.638319	0.655984	0.617356	0.455586	0.641647	0.43702	0.500202	0.554877	0.616464	0.524333	0.538224	0.431353	0.464457	0.438341	0.296488	0.529109	0.510791	0.584786	0.549734	0.419452	0.592183	0.503222	0.257959	0.67501	0.404713	0.339034	0.47744	0.548682	0.581788
M_8yrs_DFC	0.56927	0.497053	0.678925	0.700266	0.653793	0.399735	0.672406	0.435346	0.492265	0.636303	0.621618	0.587235	0.522754	0.418868	0.484724	0.442543	0.287025	0.553031	0.531055	0.587426	0.594727	0.438726	0.607071	0.572635	0.262046	0.745501	0.467415	0.327904	0.456287	0.579941	0.616015
M_8yrs_STR	0.548167	0.48808	0.619623	0.628612	0.608339	0.392298	0.611632	0.412656	0.484422	0.626217	0.620568	0.566003	0.508697	0.383127	0.462024	0.431875	0.308566	0.503204	0.514213	0.57005	0.568598	0.424157	0.586848	0.532139	0.25113	0.698696	0.439318	0.327672	0.441793	0.546629	0.582112
M_8yrs_A1C	0.56197	0.494359	0.643245	0.675664	0.605882	0.424073	0.630469	0.430398	0.492401	0.623675	0.618695	0.567116	0.515799	0.412299	0.484848	0.441906	0.29627	0.52845	0.523049	0.580142	0.590808	0.442823	0.60023	0.563017	0.273387	0.725394	0.453447	0.322936	0.441039	0.564542	0.594345
M_8yrs_MFC	0.560386	0.487081	0.63138	0.66772	0.589684	0.394243	0.623888	0.414166	0.486923	0.613236	0.609745	0.60561	0.513756	0.410606	0.480695	0.449423	0.319923	0.50863	0.518649	0.579451	0.572915	0.426041	0.595743	0.541928	0.2934	0.710398	0.451161	0.327338	0.460324	0.570263	0.599134
M_8yrs_OFC	0.575966	0.489159	0.68272	0.707158	0.654141	0.434162	0.675629	0.426388	0.496941	0.64295	0.615173	0.605919	0.528588	0.43409	0.496344	0.452037	0.300911	0.5559	0.529978	0.590842	0.597909	0.436555	0.611478	0.575167	0.277411	0.745694	0.458824	0.329934	0.451572	0.581878	0.613682
M_8yrs_MFC.1	0.545163	0.475422	0.682155	0.699776	0.661149	0.402872	0.679964	0.392534	0.457591	0.596493	0.584286	0.591915	0.477939	0.398609	0.468682	0.432127	0.26552	0.541467	0.491808	0.556506	0.617071	0.429818	0.580041	0.616813	0.262777	0.744866	0.438256	0.274497	0.375962	0.561457	0.572002
M_8yrs_CBC.1	0.59615	0.51705	0.749145	0.752758	0.743563	0.503715	0.749912	0.451722	0.510784	0.569553	0.613866	0.556719	0.542737	0.438968	0.491442	0.45466	0.282099	0.610545	0.548744	0.615985	0.599093	0.442564	0.619365	0.584914	0.291856	0.722887	0.460255	0.331327	0.467935	0.608663	0.622841
M_8yrs_A1C.1	0.592663	0.513536	0.772878	0.778921	0.764545	0.420658	0.767567	0.460162	0.514292	0.668186	0.613624	0.581966	0.533559	0.429158	0.513811	0.460715	0.260197	0.570811	0.561317	0.620156	0.640627	0.446472	0.632633	0.638676	0.28545	0.796179	0.495123	0.311059	0.441416	0.615748	0.632746
M_8yrs_VFC.1	0.581708	0.493383	0.731555	0.74059	0.719986	0.443236	0.730217	0.443306	0.495744	0.614038	0.603525	0.590857	0.522693	0.397644	0.501803	0.456011	0.279699	0.573631	0.542291	0.607073	0.627664	0.453772	0.623422	0.628104	0.284702	0.77684	0.459033	0.296308	0.426504	0.588593	0.608393
M_8yrs_HIP.1	0.576029	0.492079	0.705342	0.712444	0.695975	0.418492	0.706033	0.44812	0.497191	0.625137	0.59494	0.570863	0.514035	0.412527	0.506189	0.457854	0.287707	0.545015	0.541416	0.589172	0.616467	0.444757	0.617841	0.603019	0.278018	0.759258	0.463084	0.310762	0.436009	0.589789	0.606415
M_8yrs_AMY.1	0.582893	0.49129	0.726393	0.734224	0.716172	0.427767	0.728243	0.446558	0.500748	0.65362	0.610597	0.588502	0.532197	0.417193	0.494961	0.456732	0.267621	0.552109	0.549814	0.610756	0.624041	0.445291	0.620453	0.614602	0.281461	0.770324	0.473798	0.301627	0.431125	0.586872	0.603108
M_8yrs_V1C.1	0.593254	0.506139	0.766157	0.769817	0.760488	0.470197	0.757425	0.461403	0.505235	0.607169	0.611794	0.586868	0.521972	0.427664	0.519451	0.456465	0.273149	0.621007	0.546344	0.611563	0.640272	0.439441	0.624537	0.634258	0.293501	0.781217	0.496869	0.31107	0.444295	0.597565	0.617409
M_8yrs_IPC.1	0.586117	0.489156	0.749047	0.759734	0.735606	0.457806	0.743963	0.446909	0.496876	0.662768	0.60055	0.591306	0.516266	0.417039	0.507914	0.456934	0.279563	0.580619	0.548774	0.604157	0.62922	0.443239	0.620947	0.614956	0.29071	0.781349	0.47985	0.303827	0.425679	0.609191	0.622057
M_8yrs_DFC.1	0.572147	0.490535	0.725387	0.736364	0.711673	0.423726	0.720094	0.418139	0.478798	0.648893	0.614325	0.601033	0.491281	0.403647	0.492898	0.436919	0.2582	0.579426	0.5215	0.579145	0.620153	0.433555	0.598842	0.612621	0.269939	0.771687	0.472999	0.300706	0.425166	0.579937	0.601988
M_8yrs_STC.1	0.590975	0.508446	0.763598	0.773201	0.751331	0.443262	0.760041	0.449794	0.505809	0.659651	0.617358	0.57593	0.528644	0.413811	0.506047	0.458661	0.270022	0.595153	0.547724	0.608896	0.657739	0.458681	0.634369	0.66445	0.308424	0.788994	0.482676	0.30691	0.443003	0.595963	0.614588
M_8yrs_ITC.1	0.578293	0.485788	0.754357	0.763965	0.742104	0.418183	0.752024	0.451758	0.499723	0.627915	0.576827	0.611774	0.494748	0.399303	0.509898	0.458348	0.300263	0.58184	0.532219	0.595616	0.642063	0.449596	0.621343	0.635902	0.294431	0.769966	0.493104	0.28899	0.394455	0.614569	0.610115
F_11yrs_VFC	0.588631	0.491673	0.7286	0.732521	0.722717	0.422689	0.721135	0.431265	0.498265	0.647107	0.626651	0.574399	0.52103	0.421993	0.486235	0.452132	0.278253	0.575936	0.548692	0.607558	0.631463	0.45329	0.629555	0.619314	0.266951	0.769577	0.449374	0.294018	0.409546	0.588091	0.605753
F_11yrs_IPC	0.584297	0.498195	0.727616	0.732671	0.720477	0.415503	0.718444	0.434327	0.49549	0.652704	0.612512	0.578486	0.514953	0.427229	0.502642	0.451096	0.307842	0.604295	0.526908	0.594701	0.630413	0.44611	0.6213	0.626788	0.271035	0.768821	0.472507	0.295101	0.39726	0.59562	0.612504
F_11yrs_ITC	0.558204	0.461266	0.673451	0.687028	0.656958	0.406848	0.66611	0.439299	0.474982	0.622606	0.579763	0.595546	0.483214	0.387143	0.48859	0.449812	0.293473	0.52704	0.510986	0.559865	0.62081	0.432543	0.596582	0.595833	0.258449	0.732463	0.422979	0.280745	0.365774	0.575218	0.594419
F_11yrs_STC	0.573025	0.491663	0.696071	0.708194	0.681146	0.403134	0.687474	0.421162	0.484335	0.64436	0.605178	0.594204	0.506551	0.407535	0.492064	0.448326	0.28814	0.528189	0.524174	0.579478	0.61296	0.439625	0.609663	0.598109	0.267301	0.750096	0.436658	0.288647	0.401308	0.589015	0.60438
F_11yrs_S1C	0.579231	0.482646	0.724374	0.728297	0.7185	0.410476	0.717677	0.447573	0.490235	0.645631	0.595896	0.572124	0.509286	0.404585	0.503378	0.453077	0.281556	0.558873	0.53826	0.588959	0.635311	0.459107	0.622824	0.621931	0.267976	0.763905	0.453351	0.283995	0.382584	0.595091	0.603485
F_11yrs_DFC	0.589379	0.50414	0.735817	0.738951	0.730795	0.448258	0.728012	0.456487	0.496852	0.652182	0.624603	0.572164	0.531644	0.417722	0.485891	0.454591	0.278154	0.571863	0.544541	0.602783	0.622927	0.460655	0.630483	0.620746	0.27135	0.773233	0.436163	0.29133	0.399357	0.587427	0.602748
F_11yrs_AMY	0.585092	0.494002	0.708815	0.714703	0.700788	0.404368	0.710541	0.444178	0.493401	0.604818	0.620906	0.56357	0.524069	0.419425	0.49061	0.45689	0.275675	0.584004	0.548892	0.586447	0.612889	0.447215	0.61932	0.604551	0.263067	0.75218	0.446458	0.28777	0.416479	0.589099	0.618013
F_11yrs_V1C	0.593924	0.510834	0.745889	0.754443	0.734823	0.436834	0.731616	0.452248	0.493796	0.653955	0.624083	0.557274	0.533077	0.428241	0.498466	0.451522	0.250582	0.580851	0.546312	0.606566	0.62325	0.45258	0.62865	0.605365	0.262538	0.771906	0.457065	0.297402	0.414539	0.592351	0.61352
F_11yrs_CBC	0.582538	0.502448	0.721856	0.722482	0.71965	0.468262	0.734098	0.410491	0.487304	0.497308	0.599063	0.515935	0.510146	0.421793	0.471812	0.43849	0.228828	0.638936	0.51589	0.579133	0.599658	0.430782	0.599316	0.573313	0.253884	0.696449	0.412057	0.29149	0.392434	0.581192	0.602792
F_11yrs_A1C	0.591985	0.494484	0.760025	0.762663	0.755504	0.443019	0.749485	0.440088	0.501423	0.641673	0.605272	0.564853	0.516613	0.427476	0.511675	0.457068	0.282228	0.602517	0.540433	0.59864	0.637916	0.457421	0.631614	0.627109	0.260288	0.7771	0.468976	0.281216	0.395266	0.603479	0.616109
F_11yrs_HIP	0.556363	0.467924	0.62418	0.633065	0.613002	0.400248	0.62559	0.43516	0.480861	0.61895	0.60734	0.582024	0.49381	0.380066	0.487755	0.447832	0.310563	0.496495	0.51559	0.569724	0.605735	0.434024	0.59329	0.589181	0.276421	0.710054	0.435467	0.290792	0.387853	0.57725	0.593978
F_11yrs_M1C	0.584699	0.504694	0.721814	0.726403	0.715204	0.414394	0.715726	0.443999	0.49331	0.650283	0.625046	0.556473	0.536661	0.41565	0.492687	0.451056	0.277769	0.547154	0.546887	0.601295	0.629869	0.45723	0.627142	0.62031	0.265448	0.768836	0.442811	0.298973	0.415355	0.588856	0.608697
F_11yrs_OFC	0.584424	0.48625	0.726543	0.727984	0.72342	0.409419	0.719824	0.431647	0.491317	0.655019	0.601171	0.578018	0.52505	0.416056	0.494714	0.44887	0.307566	0.592561	0.545531	0.599295	0.633126	0.448762	0.623087	0.617975	0.260439	0.76561	0.435868	0.288145	0.397514	0.590201	0.606526
F_11yrs_MFC	0.58519	0.493507	0.734105	0.735964	0.730503	0.416226	0.728102	0.437818	0.490624	0.648921	0.62088	0.565422	0.524927	0.41344	0.493368	0.459905	0.282484	0.561654	0.549463	0.599934	0.631589	0.456324	0.627766	0.622741	0.270408	0.77147	0.447311	0.291769	0.405359	0.585765	0.609613
F_13yrs_MFC	0.58584	0.508282	0.72432	0.732399	0.713828	0.399985	0.718787	0.441881	0.494263	0.639545	0.642185	0.577381	0.530395	0.402445	0.484812	0.455366	0.275599	0.544562	0.561386	0.611806	0.614929	0.449339	0.625572	0.604369	0.263353	0.769689	0.45326	0.306467	0.443512	0.600622	0.62748
F_13yrs_IPC	0.590767	0.512599	0.739559	0.749232	0.727265	0.451337	0.731875	0.446437	0.500381	0.662109	0.637484	0.582503	0.552799	0.420964	0.478422	0.451097	0.26264	0.582694	0.565257	0.61697	0.61286	0.45931	0.632282	0.608087	0.271467	0.78409	0.466043	0.322831	0.457946	0.592935	0.621998
F_13yrs_VFC	0.582146	0.50725	0.735286	0.742632	0.725586	0.404563	0.728733	0.454487	0.496427	0.651032	0.640161	0.577215	0.530478	0.429331	0.493187	0.452635	0.294038	0.574385	0.551856	0.605097	0.623069	0.454285	0.626779	0.615701	0.257247	0.778538	0.453412	0.307485	0.437769	0.589923	0.622118
F_13yrs_A1C	0.591863	0.506398	0.746264	0.754947	0.735054	0.401051	0.737242	0.434674	0.496574	0.637875	0.631962	0.567168	0.532053	0.421974	0.491172	0.447929	0.273998	0.59273	0.555536	0.605028	0.621473	0.454007	0.629424	0.609222	0.267541	0.780666	0.462916	0.313776	0.429227	0.599669	0.622016
F_13yrs_ITC	0.58876	0.514754	0.738188	0.742973	0.731326	0.434296	0.731818	0.448781	0.500896	0.661719	0.652618	0.575303	0.542583	0.424438	0.48412	0.448605	0.273947	0.554817	0.558461	0.61693	0.624158	0.456732	0.633124	0.623427	0.259748	0.788296	0.439691	0.322265	0.452324	0.585569	0.62319
F_13yrs_STC	0.584843	0.510193	0.734852	0.743118	0.72413	0.418701	0.728005	0.452099	0.501664	0.644745	0.656229	0.58424	0.550191	0.431393	0.486789	0.451474	0.281907	0.563043	0.55527	0.613406	0.609984	0.452559	0.629025	0.599918	0.265405	0.780309	0.455734	0.321098	0.446239	0.592781	0.62358
F_13yrs_CBC	0.581993	0.519609	0.711393	0.715828	0.704976	0.470503	0.712989	0.42564	0.482557	0.547379	0.616088	0.506035	0.520085	0.414642	0.466996	0.440319	0.327111	0.61918	0.526688	0.593355	0.592867	0.437645	0.611739	0.568828	0.25901	0.699032	0.433865	0.308787	0.431664	0.581611	0.612145
F_13yrs_V1C	0.585077	0.520341	0.722667	0.734824	0.707648	0.391889	0.711676	0.437025	0.490775	0.650723	0.648667	0.579063	0.544084	0.421585	0.478273	0.442853	0.26955	0.567661	0.557596	0.603017	0.596697	0.441523	0.62011	0.574216	0.255005	0.766271	0.435977	0.314899	0.449832	0.580679	0.614207
F_13yrs_S1C	0.587439	0.506978	0.738704	0.748932	0.725794	0.415178	0.729642	0.433498	0.499087	0.647241	0.64644	0.576833	0.540077	0.43122	0.494272	0.455617	0.304961	0.578657	0.557707	0.607212	0.622296	0.450412	0.623148	0.617639	0.276006	0.783486	0.473294	0.318673	0.449943	0.590741	0.620268
F_13yrs_DFC	0.594647	0.509276	0.747603	0.758548	0.733878	0.411344	0.738002	0.452892	0.500791	0.66479	0.640198	0.571604	0.543597	0.428725	0.498513	0.454608	0.300044	0.556932	0.56615	0.616927	0.628082	0.455498	0.632904	0.625886	0.280196	0.785458	0.483569	0.317905	0.450194	0.603211	0.622757
F_13yrs_OFC	0.592401	0.518254	0.740083	0.748849	0.728795	0.406847	0.731938	0.44159	0.503773	0.658928	0.659485	0.568905	0.550539	0.41707	0.489199	0.451302	0.289608	0.582627	0.561229	0.6122	0.620082	0.461661	0.63334	0.616829	0.264122	0.781923	0.465496	0.31493	0.450944	0.592963	0.620987
F_13yrs_MD	0.56602	0.514887	0.668257	0.673192	0.661376	0.41698	0.65933	0.422143	0.487127	0.681442	0.648716	0.577777	0.520566	0.390133	0.451192	0.442814	0.284391	0.545541	0.541307	0.590567	0.550049	0.415765	0.589249	0.527816	0.269608	0.711805	0.416537	0.346796	0.50285	0.585413	0.627133
F_13yrs_AMY	0.579422	0.507953	0.716455	0.725577	0.70482	0.382633	0.713582	0.456468	0.485076	0.642137	0.64905	0.564599	0.526091	0.394564	0.47357	0.452235	0.282111	0.538463	0.55875	0.603308	0.601301	0.442993	0.616007	0.588407	0.263052	0.764454	0.436815	0.30363	0.447794	0.585249	0.626082
F_13yrs_M1C	0.591681	0.502651	0.744338	0.755149	0.730769	0.435599	0.736705	0.445435	0.500798	0.653488	0.633726	0.56887	0.541577	0.413179	0.502699	0.454503	0.279275	0.562124	0.552811	0.610797	0.626104	0.453074	0.631637	0.61981	0.278059	0.785761	0.468904	0.306076	0.431182	0.597889	0.624823
F_13yrs_HIP	0.572952	0.499893	0.692227	0.695908	0.686689	0.408459	0.693838	0.439389	0.486309	0.629474	0.626879	0.572041	0.532515	0.389032	0.464723	0.44504	0.262687	0.532846	0.544788	0.595371	0.596647	0.437634	0.611102	0.586616	0.253051	0.745691	0.441011	0.318451	0.460912	0.582358	0.619598
F_13yrs_STR	0.570316	0.503707	0.690445	0.671799	0.709715	0.396841	0.688684	0.428969	0.487575	0.631606	0.635147	0.547962	0.512975	0.4005	0.463774	0.443297	0.322915	0.552494	0.549441	0.595067	0.589613	0.432936	0.608606	0.571888	0.245892	0.732289	0.416966	0.314578	0.444689	0.568134	0.604019
M_15yrs_IPC	0.581763	0.488134	0.762744	0.770342	0.752706	0.419403	0.749232	0.447378	0.484944	0.654545	0.601193	0.560119	0.512693	0.407884	0.505873	0.450048	0.295464	0.586037	0.536932	0.590565	0.640617	0.452171	0.622727	0.633574	0.272073	0.774177	0.482922	0.282577	0.396952	0.598867	0.617253
M_15yrs_CBC	0.572359	0.495972	0.700961	0.705215	0.694767	0.457591	0.705163	0.441797	0.491889	0.523198	0.602459	0.50113	0.521313	0.430181	0.479042	0.441345	0.302581	0.611021	0.525875	0.587517	0.58771	0.434504	0.604093	0.557045	0.258116	0.691588	0.423212	0.331001	0.445286	0.587445	0.60927
M_15yrs_STC	0.580189	0.481501	0.751002	0.76125	0.738044	0.420404	0.736758	0.445687	0.498312	0.643593	0.603201	0.554311	0.510488	0.419323	0.514087	0.449808	0.284258	0.588457	0.537737	0.590135	0.635082	0.444707	0.619269	0.621334	0.271444	0.767817	0.482438	0.285486	0.392802	0.597015	0.619148
M_15yrs_ITC	0.588092	0.502802	0.760544	0.766088	0.752792	0.435385	0.749059	0.46079	0.496844	0.649188	0.61546	0.554177	0.515671	0.406837	0.503593	0.455372	0.267655	0.585186	0.544063	0.596476	0.635436	0.45242	0.625552	0.624004	0.264757	0.77698	0.481307	0.289554	0.413835	0.599922	0.617594
M_15yrs_AMY	0.588865	0.486281	0.747563	0.753002	0.739955	0.404615	0.745106	0.455913	0.495711	0.645974	0.614286	0.570752	0.50999	0.401194	0.509285	0.461732	0.307729	0.577429	0.555824	0.598066	0.632982	0.452509	0.626092	0.627848	0.271089	0.778301	0.470541	0.294106	0.41519	0.594586	0.624092
M_18yrs_HIP	0.567634	0.493882	0.662839	0.672286	0.650956	0.401138	0.655952	0.409067	0.485089	0.599062	0.612322	0.539151	0.512847	0.406467	0.458161	0.429042	0.269855	0.523238	0.532912	0.573533	0.561204	0.415692	0.59113	0.541085	0.266434	0.693992	0.416201	0.322913	0.456429	0.567738	0.616008
M_18yrs_M1C	0.566284	0.504782	0.655486	0.67637	0.630911	0.410411	0.649654	0.428417	0.481673	0.612556	0.627707	0.575707	0.523695	0.409698	0.446867	0.435767	0.256231	0.510961	0.539569	0.587571	0.566304	0.4174	0.593086	0.54185	0.263138	0.700417	0.427105	0.334026	0.469111	0.553367	0.597145
M_18yrs_V1C	0.572581	0.498255	0.690687	0.713651	0.663727	0.399923	0.683012	0.429255	0.484466	0.616254	0.618204	0.595621	0.514708	0.399925	0.470196	0.448049	0.292161	0.550644	0.543807	0.593152	0.569748	0.428926	0.599176	0.541645	0.272513	0.717412	0.434544	0.311009	0.447688	0.569245	0.603065
M_18yrs_A1C	0.564023	0.497058	0.657033	0.673725	0.637113	0.384659	0.653867	0.426623	0.482526	0.613029	0.612463	0.578545	0.518988	0.404429	0.447278	0.430032	0.273617	0.514361	0.531501	0.580843	0.556775	0.416344	0.588385	0.525023	0.245294	0.695619	0.389339	0.327038	0.467007	0.557071	0.601234
M_18yrs_ITC	0.576149	0.496015	0.680259	0.700728	0.656094	0.387634	0.675239	0.422245	0.482362	0.624289	0.623415	0.588711	0.510374	0.405881	0.472181	0.446804	0.273266	0.545433	0.53386	0.590658	0.588235	0.434305	0.6027	0.570296	0.28614	0.717875	0.445596	0.324253	0.459593	0.579996	0.608095
M_18yrs_VFC	0.580521	0.505754	0.696503	0.715479	0.673961	0.387343	0.690595	0.426281	0.491255	0.630078	0.630534	0.587776	0.533473	0.422082	0.472679	0.44924	0.305471	0.559074	0.559557	0.606005	0.598192	0.431895	0.60627	0.583856	0.269487	0.743312	0.441016	0.318384	0.465201	0.573654	0.609692
M_18yrs_MFC	0.571374	0.501965	0.668782	0.68918	0.64472	0.397926	0.666437	0.434105	0.480244	0.620679	0.618312	0.57642	0.507668	0.405453	0.450363	0.436276	0.275559	0.532802	0.537989	0.587596	0.57038	0.426456	0.594858	0.548306	0.257674	0.697691	0.406686	0.326958	0.453243	0.5563	0.60529
M_18yrs_STC	0.566397	0.499739	0.668361	0.685656	0.647747	0.391024	0.661831	0.427488	0.483158	0.614602	0.628386	0.58043	0.523067	0.413619	0.446003	0.432439	0.283621	0.527291	0.530976	0.578714	0.566272	0.418538	0.587945	0.541614	0.26202	0.704549	0.40589	0.33	0.475252	0.563137	0.597709
M_18yrs_DFC	0.581848	0.499351	0.717515	0.735115	0.69646	0.396579	0.711164	0.445492	0.497313	0.636566	0.632122	0.591416	0.520706	0.414591	0.485228	0.457412	0.318735	0.575819	0.554225	0.599814	0.617545	0.443785	0.618914	0.599487	0.272424	0.755363	0.468137	0.314621	0.427074	0.590079	0.613547
M_18yrs_S1C	0.570083	0.51661	0.65952	0.675826	0.640024	0.41944	0.65317	0.420465	0.485272	0.613736	0.647318	0.581228	0.537843	0.419053	0.449622	0.435023	0.262439	0.520732	0.542703	0.589216	0.560858	0.423978	0.599001	0.535481	0.252339	0.710797	0.422073	0.341831	0.478493	0.558604	0.600607
M_18yrs_IPC	0.57424	0.51484	0.69321	0.706318	0.677197	0.39398	0.689195	0.424963	0.494195	0.627463	0.642916	0.587799	0.525772	0.409258	0.467551	0.445158	0.288517	0.538169	0.550155	0.60051	0.584413	0.434531	0.609599	0.569656	0.278141	0.738691	0.458684	0.328275	0.45596	0.574169	0.603591
M_18yrs_OFC	0.575151	0.499254	0.685011	0.703946	0.662541	0.377184	0.677932	0.436195	0.487106	0.636811	0.642209	0.606135	0.537785	0.417816	0.466407	0.442142	0.325821	0.539668	0.547748	0.598375	0.594264	0.437254	0.607553	0.578246	0.26691	0.73779	0.439504	0.323469	0.463881	0.57198	0.604835
M_18yrs_CBC	0.571667	0.521484	0.669097	0.684334	0.650768	0.416997	0.674948	0.430672	0.482799	0.534253	0.625586	0.556284	0.531379	0.431755	0.452522	0.435447	0.296971	0.573639	0.540785	0.599647	0.572866	0.42994	0.60188	0.540863	0.266128	0.688069	0.414011	0.326195	0.469983	0.567512	0.595374
F_19yrs_STC	0.597306	0.527624	0.756642	0.767254	0.743268	0.447421	0.745963	0.453877	0.510572	0.657538	0.651736	0.56061	0.539044	0.43756	0.505883	0.457	0.251162	0.598171	0.552782	0.617287	0.628079	0.462131	0.634948	0.625898	0.274434	0.789443	0.464275	0.314245	0.451317	0.60703	0.622108
F_19yrs_CBC	0.586394	0.527951	0.708471	0.720659	0.693447	0.474854	0.710133	0.434325	0.492188	0.549348	0.651476	0.530133	0.529132	0.427512	0.479106	0.449663	0.299348	0.609142	0.531756	0.599033	0.583491	0.439605	0.614204	0.551459	0.269592	0.710924	0.431032	0.323994	0.45701	0.588464	0.607578
F_19yrs_DFC	0.593984	0.516678	0.738674	0.748289	0.726446	0.446354	0.730493	0.448312	0.509276	0.655318	0.64235	0.552822	0.556056	0.437281	0.493048	0.455319	0.274844	0.565464	0.553278	0.615331	0.62001	0.454367	0.633318	0.6152	0.269166	0.787406	0.458513	0.324197	0.454576	0.597309	0.622727
F_19yrs_AMY	0.587702	0.519895	0.69583	0.709963	0.678671	0.412536	0.694949	0.435155	0.508389	0.647578	0.680157	0.556505	0.549857	0.428076	0.480292	0.460083	0.266626	0.548331	0.554053	0.614454	0.599724	0.451784	0.628406	0.599025	0.267334	0.76248	0.434774	0.333975	0.476114	0.582442	0.620694
F_19yrs_OFC	0.594018	0.513455	0.741823	0.749048	0.732244	0.410573	0.730885	0.440792	0.513215	0.652674	0.645823	0.554422	0.536501	0.440554	0.505879	0.463262	0.282203	0.573004	0.550189	0.609799	0.624464	0.462793	0.632055	0.61862	0.270835	0.784024	0.467738	0.311077	0.446627	0.595347	0.626347
F_19yrs_ITC	0.589545	0.512042	0.721058	0.733656	0.705553	0.414697	0.713485	0.435779	0.502755	0.659881	0.652595	0.56725	0.546751	0.420827	0.488117	0.455021	0.251753	0.561731	0.556395	0.615263	0.610156	0.461592	0.631336	0.605117	0.272732	0.772511	0.456281	0.329668	0.469473	0.586453	0.625048
F_19yrs_STR	0.582683	0.513006	0.726392	0.71244	0.740372	0.391528	0.723717	0.436186	0.499479	0.643061	0.6169	0.521817	0.502396	0.404877	0.501505	0.452787	0.296132	0.587586	0.540343	0.596065	0.627382	0.448575	0.617266	0.615711	0.26142	0.755779	0.475616	0.305533	0.400116	0.593648	0.609208
F_19yrs_S1C	0.592473	0.506344	0.749316	0.75824	0.737832	0.416532	0.736074	0.458346	0.500455	0.639792	0.641305	0.556479	0.531082	0.427258	0.500662	0.456239	0.258557	0.571943	0.5562	0.609404	0.627494	0.454317	0.631138	0.612989	0.26746	0.782518	0.464185	0.305792	0.430694	0.595575	0.623331
F_19yrs_M1C	0.589787	0.515226	0.722045	0.734676	0.706499	0.412182	0.71367	0.447804	0.505527	0.633644	0.647479	0.551917	0.546515	0.443981	0.501482	0.454655	0.285904	0.543782	0.552063	0.613084	0.613905	0.454329	0.628506	0.603971	0.277427	0.775262	0.44962	0.322792	0.456833	0.598962	0.621785
F_19yrs_HIP	0.592011	0.537356	0.717939	0.721164	0.712854	0.424937	0.714612	0.430563	0.506456	0.630761	0.672088	0.550317	0.541131	0.42317	0.493582	0.458652	0.264329	0.54422	0.553129	0.606763	0.608275	0.446553	0.628634	0.605755	0.273144	0.773	0.459119	0.317399	0.458379	0.593667	0.618611
F_19yrs_A1C	0.592588	0.509472	0.731999	0.740838	0.720645	0.418565	0.721803	0.459579	0.490771	0.623732	0.628446	0.561071	0.518486	0.418693	0.498217	0.451792	0.284293	0.592835	0.544142	0.602469	0.627565	0.452257	0.630911	0.609441	0.272821	0.770469	0.480303	0.300099	0.424518	0.59617	0.621312
F_19yrs_V1C	0.595278	0.531764	0.749029	0.762797	0.732165	0.476391	0.732107	0.442849	0.499106	0.660818	0.660361	0.556636	0.543455	0.445969	0.49494	0.454546	0.24375	0.582809	0.554289	0.618587	0.616639	0.446567	0.633316	0.601492	0.248385	0.775568	0.429998	0.315097	0.442968	0.598662	0.623071
F_19yrs_IPC	0.59575	0.508995	0.759026	0.768015	0.747449	0.421947	0.745487	0.45043	0.496757	0.645496	0.630334	0.561112	0.527756	0.427992	0.503737	0.458033	0.273148	0.608232	0.553532	0.612032	0.632993	0.460779	0.632554	0.622335	0.278403	0.788076	0.487839	0.301394	0.433357	0.604092	0.622548
F_19yrs_VFC	0.596917	0.52038	0.731001	0.741914	0.717346	0.420243	0.722186	0.452731	0.506699	0.654051	0.658519	0.553853	0.544552	0.431492	0.49121	0.449408	0.245991	0.561334	0.557294	0.614228	0.611558	0.459749	0.627519	0.614696	0.269289	0.778531	0.451873	0.322709	0.4579	0.600378	0.622078
F_19yrs_MFC	0.591021	0.514468	0.739988	0.749775	0.727566	0.413476	0.732002	0.445072	0.502036	0.647805	0.647501	0.54039	0.527848	0.426039	0.500908	0.459109	0.270405	0.575369	0.55095	0.606052	0.625779	0.456267	0.63398	0.620106	0.268513	0.784962	0.453299	0.301961	0.430469	0.596727	0.619299
F_19yrs_MD	0.586852	0.522958	0.69937	0.696409	0.701194	0.465749	0.692208	0.441621	0.514138	0.660272	0.67059	0.51865	0.519525	0.421204	0.506662	0.4587	0.273166	0.565716	0.533532	0.586259	0.596101	0.438662	0.61605	0.580216	0.274421	0.744051	0.448051	0.319409	0.446568	0.607552	0.631618
F_21yrs_MFC	0.588914	0.501556	0.754001	0.759905	0.745863	0.440353	0.75236	0.448312	0.493896	0.657329	0.608318	0.587392	0.517567	0.411531	0.509778	0.457255	0.281986	0.580489	0.546317	0.599032	0.630536	0.452108	0.624741	0.637381	0.28786	0.786225	0.489864	0.293895	0.425483	0.612283	0.630361
F_21yrs_M1C	0.598711	0.506549	0.771328	0.776932	0.763487	0.434931	0.762991	0.458906	0.510702	0.645622	0.612964	0.565998	0.523992	0.434933	0.519189	0.45384	0.30213	0.628807	0.555146	0.609742	0.649122	0.45619	0.634988	0.65049	0.275652	0.792621	0.474798	0.302189	0.421691	0.609934	0.634849
F_21yrs_A1C	0.593539	0.493137	0.76727	0.773777	0.758434	0.429392	0.757447	0.461526	0.508477	0.654505	0.607429	0.572697	0.522833	0.435136	0.525376	0.460911	0.274508	0.595719	0.549016	0.60711	0.638682	0.462153	0.633154	0.635279	0.27927	0.77851	0.481598	0.297874	0.41304	0.610599	0.624349
F_21yrs_DFC	0.586155	0.502327	0.770232	0.774879	0.763456	0.418548	0.761384	0.437741	0.49873	0.654131	0.615315	0.553456	0.529334	0.421151	0.50895	0.452073	0.280283	0.589727	0.551666	0.6054	0.644433	0.456129	0.625963	0.640441	0.27174	0.784865	0.470646	0.299481	0.411825	0.605668	0.627325
F_21yrs_AMY	0.585781	0.499942	0.737091	0.745193	0.726547	0.406813	0.734638	0.456667	0.500467	0.654252	0.606677	0.568782	0.528798	0.410024	0.509431	0.459623	0.309982	0.582141	0.551073	0.606629	0.642588	0.456609	0.622607	0.645714	0.277382	0.772218	0.481054	0.30249	0.41549	0.605427	0.62679
F_21yrs_MD	0.58025	0.502471	0.715319	0.709472	0.720317	0.456146	0.715138	0.438813	0.502041	0.652886	0.632478	0.507794	0.512285	0.399112	0.504011	0.451706	0.32757	0.611808	0.534876	0.581472	0.597493	0.429084	0.610729	0.572299	0.25817	0.75254	0.448985	0.306404	0.434937	0.607444	0.626831
F_21yrs_V1C	0.594472	0.49836	0.771883	0.772115	0.77001	0.43422	0.764325	0.451801	0.503579	0.654318	0.604117	0.570807	0.533589	0.430498	0.517944	0.456749	0.298786	0.618873	0.549753	0.605479	0.640653	0.459313	0.631554	0.632572	0.262608	0.780793	0.486204	0.288146	0.396054	0.600806	0.620934
F_21yrs_STC	0.594114	0.508192	0.772535	0.77809	0.764746	0.439338	0.766022	0.452028	0.503497	0.658155	0.611546	0.570911	0.529425	0.424138	0.515596	0.456387	0.29226	0.59352	0.556986	0.608665	0.639237	0.462406	0.63262	0.641977	0.274609	0.791156	0.479153	0.305583	0.427523	0.611645	0.627054
F_21yrs_VFC	0.589314	0.499018	0.779205	0.779817	0.776894	0.432644	0.772951	0.454997	0.497316	0.652056	0.606897	0.571701	0.515467	0.418646	0.517548	0.45442	0.294976	0.60484	0.544754	0.601617	0.647044	0.454223	0.628236	0.648573	0.278786	0.790876	0.479017	0.287466	0.40557	0.605375	0.625565
F_21yrs_CBC	0.58844	0.51625	0.74498	0.743434	0.745137	0.477947	0.753054	0.447724	0.505641	0.541222	0.603335	0.540848	0.518416	0.439095	0.508929	0.452781	0.344697	0.64183	0.529878	0.596012	0.604996	0.448412	0.617823	0.579096	0.275897	0.723228	0.461463	0.304332	0.425509	0.604098	0.625497
F_21yrs_S1C	0.598626	0.512566	0.77522	0.773378	0.775643	0.455624	0.769886	0.451144	0.50369	0.661052	0.607778	0.570682	0.521557	0.426939	0.52939	0.461155	0.287011	0.605016	0.555164	0.606176	0.645004	0.462485	0.631349	0.642988	0.276468	0.784768	0.470978	0.292992	0.412054	0.606466	0.619298
F_21yrs_ITC	0.588463	0.490077	0.747383	0.754191	0.738254	0.440127	0.743757	0.45604	0.504724	0.647404	0.608862	0.571608	0.521782	0.410601	0.514934	0.461592	0.31278	0.589812	0.550302	0.602842	0.647187	0.450184	0.626437	0.647381	0.267221	0.782318	0.477762	0.297248	0.40793	0.603045	0.628869
F_21yrs_IPC	0.596334	0.497048	0.777718	0.781017	0.772425	0.420144	0.768489	0.447649	0.505978	0.662792	0.604995	0.574724	0.519623	0.418202	0.526103	0.457571	0.295189	0.631031	0.551834	0.60784	0.643287	0.452576	0.62925	0.640604	0.26839	0.790007	0.481967	0.298047	0.418468	0.60978	0.636275
F_21yrs_HIP	0.580678	0.497133	0.706036	0.717358	0.691979	0.395702	0.713744	0.443445	0.503217	0.629188	0.610958	0.584916	0.533057	0.410217	0.508882	0.458361	0.34082	0.558268	0.539338	0.596502	0.610071	0.438455	0.617093	0.605588	0.271923	0.76343	0.443317	0.320774	0.444764	0.601342	0.623706
F_21yrs_STR	0.573636	0.498396	0.684899	0.678527	0.690545	0.412787	0.685745	0.437801	0.497739	0.633201	0.6064	0.570347	0.510924	0.393867	0.486037	0.441391	0.333688	0.539016	0.543697	0.595797	0.591647	0.429589	0.604509	0.5675	0.279388	0.733411	0.465612	0.318316	0.442609	0.575239	0.60851
F_21yrs_OFC	0.587558	0.487701	0.758358	0.763295	0.751285	0.409125	0.752289	0.459694	0.498527	0.655536	0.596008	0.579374	0.522848	0.414817	0.508472	0.457037	0.277906	0.601223	0.545462	0.600566	0.650808	0.454015	0.624246	0.653821	0.276116	0.779498	0.481659	0.299189	0.422484	0.612041	0.626431
M_23yrs_ITC	0.582431	0.491671	0.738955	0.749276	0.725941	0.398525	0.736963	0.442922	0.492159	0.64384	0.619992	0.576265	0.522117	0.414266	0.493251	0.455911	0.296012	0.572112	0.555229	0.602591	0.618455	0.451172	0.62005	0.616313	0.261116	0.771929	0.451404	0.306209	0.44398	0.593957	0.620492
M_23yrs_AMY	0.575554	0.502807	0.699273	0.716234	0.678967	0.394147	0.697855	0.437826	0.493977	0.647701	0.63424	0.560533	0.521108	0.415245	0.481452	0.455322	0.272916	0.539833	0.549709	0.593621	0.587193	0.435671	0.605194	0.569968	0.25691	0.72543	0.431182	0.330732	0.471642	0.584131	0.62373
M_23yrs_OFC	0.580934	0.487154	0.740356	0.746075	0.732452	0.394039	0.735532	0.454058	0.488548	0.654902	0.615698	0.561375	0.515636	0.404788	0.483518	0.454302	0.297106	0.595109	0.554359	0.601948	0.616587	0.448486	0.619817	0.612696	0.25513	0.772503	0.451972	0.312021	0.447017	0.587335	0.615058
M_23yrs_MD	0.567015	0.507206	0.675305	0.690542	0.656963	0.402828	0.669153	0.421099	0.488082	0.669921	0.638469	0.568667	0.508418	0.399144	0.472253	0.446978	0.285503	0.548577	0.53236	0.57344	0.544663	0.421017	0.588976	0.516126	0.244365	0.687904	0.39252	0.334903	0.48255	0.582479	0.621565
M_23yrs_STC	0.587723	0.493691	0.739485	0.747016	0.729569	0.387983	0.734595	0.458157	0.500136	0.661629	0.630741	0.577585	0.524074	0.413888	0.490917	0.451262	0.285588	0.564727	0.557926	0.604108	0.606383	0.441009	0.622589	0.591393	0.257491	0.774312	0.43832	0.308001	0.442384	0.597273	0.616753
M_23yrs_VFC	0.585032	0.500751	0.735333	0.744792	0.723285	0.419815	0.730192	0.455533	0.498804	0.645204	0.62834	0.568885	0.532379	0.427826	0.498125	0.455988	0.254224	0.579788	0.553354	0.609341	0.614801	0.44371	0.620157	0.605631	0.270367	0.77282	0.468363	0.307997	0.442805	0.592652	0.611955
M_23yrs_MFC	0.583239	0.487152	0.747913	0.754084	0.739491	0.401018	0.743693	0.444982	0.495572	0.651871	0.621345	0.570826	0.526475	0.420293	0.495502	0.456822	0.249269	0.596978	0.551453	0.604196	0.622699	0.447016	0.623762	0.621557	0.259904	0.783251	0.471174	0.296999	0.429413	0.593533	0.613647
M_23yrs_M1C	0.584207	0.496407	0.737927	0.748714	0.724398	0.416798	0.732313	0.449898	0.494952	0.643248	0.636861	0.575012	0.522529	0.415148	0.494887	0.451139	0.273482	0.594625	0.553302	0.602306	0.61135	0.445729	0.617962	0.60547	0.261819	0.774162	0.454538	0.304869	0.443904	0.599627	0.619184
M_23yrs_HIP	0.57845	0.505716	0.700257	0.703479	0.695212	0.390701	0.700254	0.436722	0.493891	0.634765	0.62454	0.55956	0.527095	0.399648	0.478655	0.452192	0.289049	0.551039	0.545245	0.589693	0.592784	0.430114	0.607387	0.575442	0.26711	0.745775	0.462942	0.326714	0.470995	0.588143	0.623546
M_23yrs_CBC	0.577686	0.503016	0.687816	0.694604	0.678834	0.456817	0.69246	0.4395	0.495389	0.565046	0.619448	0.543667	0.540825	0.440156	0.466922	0.444934	0.301704	0.589491	0.536284	0.599471	0.571314	0.430502	0.603992	0.544436	0.257886	0.700525	0.433738	0.328014	0.469891	0.580347	0.601802
M_23yrs_S1C	0.574699	0.483025	0.727842	0.73519	0.718154	0.418249	0.724049	0.456553	0.493598	0.651574	0.619677	0.582197	0.521237	0.412202	0.491187	0.452516	0.301755	0.555687	0.550773	0.597609	0.628669	0.451093	0.61881	0.62375	0.260218	0.773782	0.440872	0.303165	0.429497	0.59128	0.62351
M_23yrs_A1C	0.582068	0.490502	0.735956	0.745518	0.723791	0.391991	0.729143	0.443402	0.489949	0.646856	0.625354	0.571028	0.510336	0.420126	0.499731	0.45665	0.302053	0.587568	0.542446	0.593513	0.607596	0.440035	0.613711	0.59182	0.265769	0.759113	0.45153	0.310558	0.437247	0.587486	0.618371
M_23yrs_IPC	0.5868	0.504374	0.746457	0.75606	0.734225	0.416541	0.739346	0.456249	0.503353	0.644604	0.620719	0.581273	0.526554	0.424127	0.512815	0.459049	0.335307	0.604378	0.550567	0.602194	0.618455	0.450429	0.619461	0.604682	0.264814	0.77749	0.452494	0.302616	0.432178	0.599313	0.617069
M_23yrs_STR	0.563461	0.494328	0.701145	0.693764	0.707877	0.393341	0.698056	0.417356	0.490759	0.651516	0.618453	0.577471	0.510945	0.39898	0.461924	0.441281	0.307731	0.552685	0.539089	0.586278	0.569931	0.429937	0.596153	0.541967	0.235009	0.725631	0.420891	0.319656	0.449204	0.568482	0.600149
F_30yrs_ITC	0.5838	0.513195	0.724783	0.740897	0.705364	0.4226	0.715859	0.438918	0.495404	0.639337	0.64947	0.536879	0.545141	0.437304	0.474664	0.449988	0.262525	0.569483	0.556081	0.61375	0.613423	0.450736	0.625957	0.610973	0.265301	0.765683	0.463816	0.320258	0.466331	0.593966	0.622638
F_30yrs_STR	0.568568	0.512496	0.658194	0.653502	0.662029	0.380435	0.658703	0.438939	0.491983	0.608346	0.65029	0.549375	0.533658	0.411387	0.459892	0.442864	0.28593	0.511719	0.544854	0.602173	0.592172	0.439727	0.608613	0.573058	0.263487	0.719641	0.450021	0.329567	0.475427	0.565996	0.605074
F_30yrs_MFC	0.589624	0.518506	0.724187	0.738415	0.706864	0.435654	0.718012	0.44619	0.493032	0.643552	0.666824	0.556163	0.559914	0.42934	0.474687	0.452773	0.253948	0.573906	0.560642	0.619376	0.621549	0.44999	0.624533	0.6194	0.279171	0.773318	0.46081	0.325998	0.473156	0.593609	0.625404
F_30yrs_OFC	0.588421	0.514458	0.730302	0.744673	0.712808	0.456835	0.717994	0.450308	0.50079	0.655373	0.663392	0.556636	0.553714	0.439643	0.479269	0.45026	0.22945	0.567985	0.562913	0.617852	0.614385	0.45165	0.627618	0.609963	0.277139	0.765977	0.44882	0.324448	0.479293	0.594679	0.623101
F_30yrs_IPC	0.595488	0.519777	0.726287	0.742383	0.706883	0.47417	0.713782	0.455081	0.498259	0.64375	0.648217	0.566669	0.547998	0.42762	0.487788	0.451068	0.272249	0.557364	0.558341	0.620666	0.616318	0.450582	0.626052	0.606482	0.27696	0.765732	0.460736	0.322915	0.464554	0.600109	0.62171
F_30yrs_STC	0.588463	0.518016	0.735824	0.749932	0.71861	0.433542	0.723104	0.442808	0.490546	0.646118	0.655958	0.558215	0.550458	0.43329	0.490228	0.455105	0.257064	0.586608	0.558107	0.616391	0.617021	0.453773	0.629159	0.602747	0.276493	0.770819	0.449238	0.316294	0.445074	0.59256	0.626078
F_30yrs_S1C	0.590508	0.521593	0.727214	0.745896	0.704935	0.456732	0.713989	0.450657	0.497191	0.641179	0.659122	0.56105	0.542412	0.44117	0.488997	0.455877	0.247675	0.55753	0.553465	0.615936	0.613328	0.446405	0.6244	0.600374	0.267649	0.767264	0.440237	0.324363	0.471008	0.593612	0.625259
F_30yrs_MD	0.57375	0.504851	0.669704	0.667211	0.671072	0.478088	0.667137	0.404934	0.500085	0.625925	0.667949	0.50319	0.523948	0.408193	0.476419	0.442737	0.270458	0.540778	0.528674	0.590339	0.570101	0.436005	0.610105	0.534473	0.274016	0.7259	0.416482	0.323592	0.460089	0.592392	0.623441
F_30yrs_HIP	0.584871	0.518479	0.698508	0.71007	0.6842	0.451964	0.692323	0.434728	0.504459	0.612097	0.654232	0.55651	0.549819	0.416657	0.467936	0.453824	0.262	0.544215	0.555387	0.610607	0.612072	0.447663	0.62407	0.602998	0.278446	0.762556	0.473042	0.32515	0.477361	0.593265	0.623313
F_30yrs_A1C	0.580907	0.51974	0.690485	0.711375	0.665831	0.45558	0.676894	0.425598	0.493562	0.643373	0.660305	0.576775	0.55836	0.442904	0.469767	0.446024	0.232729	0.519718	0.557948	0.614512	0.59191	0.449029	0.62431	0.573175	0.277179	0.739532	0.414076	0.34382	0.489489	0.583287	0.617206
F_30yrs_V1C	0.592588	0.527463	0.740752	0.756626	0.721564	0.44191	0.72381	0.447328	0.497788	0.631518	0.665981	0.564636	0.549427	0.435252	0.481756	0.454233	0.243976	0.59083	0.550805	0.618535	0.613208	0.450434	0.631842	0.594875	0.267166	0.767211	0.456178	0.319636	0.458387	0.591695	0.617215
F_30yrs_DFC	0.584467	0.505306	0.729355	0.741068	0.714814	0.414273	0.719023	0.442701	0.489243	0.644023	0.633802	0.551861	0.539434	0.419427	0.490514	0.452502	0.247404	0.567811	0.550374	0.604513	0.624704	0.458837	0.623921	0.615548	0.273985	0.765081	0.470272	0.313148	0.437169	0.596713	0.632593
F_30yrs_AMY	0.577868	0.502198	0.695458	0.706921	0.681267	0.419229	0.696423	0.439755	0.499236	0.620983	0.647468	0.561136	0.536129	0.408819	0.482058	0.450991	0.269994	0.562241	0.550795	0.60174	0.606581	0.448606	0.618036	0.593648	0.259824	0.757583	0.423267	0.318724	0.453717	0.589639	0.627669
F_30yrs_M1C	0.589455	0.512408	0.724858	0.742202	0.704071	0.436533	0.7132	0.444674	0.498836	0.640098	0.656589	0.557151	0.549216	0.428115	0.486417	0.447559	0.242178	0.55594	0.554969	0.615529	0.616707	0.451136	0.625243	0.60801	0.276031	0.769475	0.453048	0.321543	0.467405	0.598019	0.629025
F_30yrs_VFC	0.584475	0.522589	0.693491	0.705341	0.678873	0.419126	0.68671	0.438663	0.490707	0.635712	0.653692	0.5659	0.551837	0.427612	0.462816	0.443576	0.230082	0.531329	0.554699	0.616491	0.595469	0.445376	0.618549	0.588446	0.272094	0.752078	0.437201	0.331962	0.481924	0.593221	0.628352
F_30yrs_CBC	0.574734	0.50642	0.691203	0.699179	0.680895	0.466041	0.68971	0.427209	0.491815	0.534524	0.642481	0.496234	0.531787	0.439374	0.468398	0.438182	0.289168	0.589237	0.530196	0.592638	0.588875	0.432403	0.60314	0.557003	0.275459	0.690507	0.409653	0.330235	0.457113	0.583688	0.607272
M_36yrs_M1C	0.59469	0.520573	0.741117	0.750428	0.72922	0.420266	0.726653	0.442214	0.498004	0.6055	0.656069	0.536897	0.542331	0.441433	0.490486	0.447862	0.232017	0.58144	0.557745	0.611756	0.622723	0.456011	0.628862	0.616173	0.263309	0.780373	0.443239	0.314627	0.450952	0.600554	0.627106
M_36yrs_STC	0.592122	0.516145	0.748363	0.762086	0.73155	0.414441	0.736865	0.448924	0.501288	0.645734	0.655001	0.543218	0.543711	0.436134	0.501431	0.461799	0.249473	0.593912	0.552527	0.607687	0.630522	0.451858	0.625121	0.621983	0.25932	0.78144	0.473957	0.310071	0.435255	0.6118	0.633377
M_36yrs_MFC	0.59181	0.508597	0.749509	0.756842	0.739793	0.410204	0.735331	0.453348	0.497939	0.630322	0.659336	0.527884	0.546197	0.425523	0.491374	0.450189	0.242803	0.595169	0.560305	0.608454	0.629934	0.45835	0.6273	0.626489	0.248209	0.784526	0.459664	0.310748	0.445503	0.598928	0.622968
M_36yrs_ITC	0.585987	0.498423	0.737644	0.756011	0.715693	0.451475	0.727716	0.439814	0.49849	0.628316	0.639604	0.563629	0.529172	0.412781	0.499687	0.454005	0.271095	0.569615	0.54641	0.60159	0.63493	0.450677	0.616782	0.633439	0.28459	0.779682	0.483009	0.318147	0.443663	0.600346	0.621019
M_36yrs_IPC	0.597304	0.514628	0.76888	0.775832	0.759547	0.421722	0.753103	0.451132	0.504295	0.64708	0.645904	0.555414	0.534825	0.435303	0.500105	0.448761	0.222995	0.617214	0.555856	0.607757	0.632626	0.458387	0.631105	0.629918	0.258534	0.791627	0.478216	0.298675	0.423003	0.602768	0.628494
M_36yrs_AMY	0.592256	0.514719	0.7108	0.722749	0.696037	0.426732	0.710918	0.45335	0.508929	0.637979	0.656159	0.556161	0.542081	0.417206	0.491423	0.45903	0.26602	0.552095	0.553612	0.60428	0.600723	0.45041	0.620208	0.588951	0.269488	0.765036	0.466171	0.330958	0.459183	0.601127	0.637059
M_36yrs_OFC	0.599698	0.516967	0.762298	0.770544	0.75154	0.398157	0.746484	0.457212	0.503544	0.632258	0.651432	0.538082	0.54112	0.430103	0.497739	0.45327	0.268538	0.597136	0.558114	0.608682	0.628228	0.453082	0.628132	0.620019	0.251944	0.787403	0.473846	0.299766	0.434871	0.614196	0.637934
M_36yrs_VFC	0.598052	0.510316	0.766768	0.771581	0.759815	0.407152	0.75184	0.465124	0.496921	0.634695	0.642878	0.543588	0.534722	0.42953	0.497997	0.447766	0.251339	0.620942	0.558293	0.606554	0.625946	0.457074	0.629716	0.617994	0.253901	0.790336	0.467924	0.297735	0.42736	0.604063	0.634545
M_36yrs_DFC	0.597305	0.504672	0.772477	0.782034	0.760242	0.421518	0.757791	0.456889	0.506051	0.647424	0.625375	0.545106	0.528609	0.437872	0.516157	0.456851	0.243304	0.620051	0.554341	0.607439	0.641334	0.456105	0.630765	0.636879	0.273148	0.795382	0.472329	0.302166	0.419823	0.609203	0.633457
M_36yrs_A1C	0.598171	0.511934	0.769122	0.774939	0.761049	0.420119	0.752786	0.468719	0.508418	0.652267	0.642276	0.525564	0.5261	0.430313	0.509546	0.456564	0.222322	0.625588	0.554414	0.607622	0.629353	0.453327	0.629106	0.61946	0.264075	0.790193	0.479217	0.301493	0.423245	0.604154	0.635906
M_36yrs_V1C	0.597464	0.512534	0.762223	0.774601	0.746874	0.424184	0.747437	0.460645	0.499758	0.652395	0.652232	0.544814	0.533401	0.433841	0.50045	0.45836	0.270861	0.597019	0.558759	0.611747	0.625384	0.460151	0.631151	0.607313	0.258142	0.78563	0.476727	0.297192	0.415939	0.603764	0.625076
M_36yrs_CBC	0.581982	0.517812	0.715754	0.721651	0.707704	0.479288	0.721129	0.431258	0.494232	0.517059	0.639402	0.515774	0.529478	0.430305	0.47219	0.446913	0.290099	0.622384	0.531889	0.598458	0.599638	0.444048	0.612141	0.572363	0.270441	0.704912	0.415281	0.323261	0.451965	0.593161	0.615623
M_36yrs_S1C	0.597779	0.52214	0.765131	0.772436	0.755414	0.41102	0.74745	0.455713	0.505473	0.625178	0.660003	0.55118	0.541875	0.431115	0.497967	0.45564	0.219466	0.595817	0.554988	0.610093	0.634513	0.457917	0.627967	0.628849	0.25954	0.79129	0.4781	0.301719	0.4337	0.60029	0.628518
M_36yrs_HIP	0.585978	0.513954	0.710972	0.718599	0.70101	0.388335	0.705325	0.449523	0.502244	0.597207	0.646454	0.548449	0.528458	0.420631	0.491141	0.464161	0.284304	0.555288	0.544816	0.593472	0.618754	0.445113	0.616403	0.610048	0.272648	0.769003	0.459307	0.319795	0.455172	0.601775	0.634458
M_36yrs_STR	0.575428	0.50251	0.695787	0.690378	0.700339	0.397876	0.693004	0.437197	0.492387	0.634957	0.629127	0.547439	0.512928	0.406325	0.487381	0.448844	0.31073	0.538974	0.542173	0.596407	0.602265	0.438184	0.61043	0.584416	0.257514	0.736683	0.442259	0.32412	0.43911	0.581189	0.613478
M_36yrs_MD	0.580023	0.525729	0.677167	0.677251	0.675656	0.463603	0.672774	0.431436	0.505604	0.621155	0.667693	0.516832	0.517694	0.428134	0.50128	0.454033	0.317316	0.561989	0.523414	0.583554	0.57527	0.437104	0.608302	0.5447	0.270021	0.727881	0.4362	0.329825	0.462271	0.603757	0.630512
M_37yrs_S1C	0.59658	0.527831	0.726594	0.743993	0.705742	0.411383	0.71287	0.44817	0.499394	0.624366	0.664688	0.561046	0.554091	0.439209	0.488331	0.455849	0.25521	0.589108	0.551362	0.613833	0.614269	0.447081	0.625421	0.597661	0.269615	0.764056	0.47395	0.339158	0.478124	0.598311	0.633005
M_37yrs_V1C	0.59201	0.506766	0.724525	0.734724	0.711676	0.429724	0.713562	0.440322	0.498055	0.639974	0.639284	0.562088	0.533994	0.419686	0.494486	0.450496	0.257365	0.579316	0.552641	0.601028	0.612111	0.451502	0.624838	0.59005	0.260359	0.751383	0.462025	0.316923	0.455606	0.58854	0.623985
M_37yrs_CBC	0.557716	0.488771	0.642217	0.666147	0.614287	0.43478	0.636287	0.420352	0.479846	0.53424	0.624851	0.553154	0.527986	0.423158	0.459031	0.435831	0.275766	0.5464	0.515938	0.584198	0.563227	0.422854	0.59384	0.528631	0.266684	0.67991	0.425803	0.33877	0.470383	0.555638	0.589703
M_37yrs_HIP	0.591289	0.506568	0.734366	0.736579	0.730371	0.416957	0.728983	0.440291	0.503948	0.631666	0.645843	0.528741	0.527614	0.409801	0.499141	0.458587	0.306788	0.582311	0.543211	0.593509	0.629655	0.455206	0.626864	0.625383	0.262181	0.772835	0.494496	0.311932	0.431023	0.598044	0.639059
M_37yrs_IPC	0.584285	0.499743	0.734279	0.7467	0.718943	0.404021	0.721951	0.448929	0.503118	0.636785	0.634905	0.561313	0.529087	0.429462	0.499935	0.458129	0.295914	0.568586	0.544645	0.600788	0.620274	0.45047	0.624	0.608864	0.272666	0.777254	0.467554	0.32868	0.4465	0.599008	0.620288
M_37yrs_MD	0.589382	0.515567	0.703584	0.693281	0.713559	0.478558	0.698658	0.435038	0.514798	0.646091	0.666146	0.514761	0.531779	0.414108	0.501712	0.458343	0.292756	0.578542	0.534509	0.594809	0.594789	0.441714	0.620081	0.572034	0.270098	0.750166	0.435065	0.335206	0.474449	0.60502	0.628257
M_37yrs_DFC	0.596711	0.514867	0.757935	0.763055	0.750659	0.383806	0.748548	0.450968	0.50527	0.626208	0.645513	0.536557	0.520089	0.420562	0.517433	0.459068	0.277599	0.604594	0.543291	0.59515	0.628349	0.454812	0.627576	0.618273	0.260295	0.779857	0.473357	0.306679	0.421058	0.607557	0.633389
M_37yrs_VFC	0.598269	0.516407	0.748534	0.751954	0.743168	0.435614	0.739473	0.460086	0.503988	0.655199	0.654202	0.535297	0.539981	0.425717	0.494289	0.456662	0.294889	0.59251	0.555679	0.604781	0.623658	0.455427	0.631771	0.612822	0.254006	0.780525	0.470215	0.320464	0.448317	0.60727	0.638002
M_37yrs_ITC	0.58257	0.49752	0.74364	0.755336	0.72909	0.408493	0.733809	0.452731	0.496203	0.63091	0.620328	0.554921	0.501147	0.424861	0.517831	0.461888	0.306321	0.587984	0.53628	0.587925	0.635631	0.443177	0.620965	0.624133	0.266117	0.765635	0.487943	0.292927	0.395653	0.599649	0.62801
M_37yrs_A1C	0.595529	0.512283	0.766154	0.77011	0.760154	0.425752	0.75591	0.456662	0.507942	0.642113	0.634805	0.56022	0.533638	0.441093	0.51474	0.460343	0.284656	0.585155	0.552612	0.605707	0.639913	0.45768	0.632377	0.636633	0.273078	0.790149	0.485939	0.328333	0.444762	0.609892	0.627676
M_37yrs_M1C	0.599552	0.520848	0.759925	0.766108	0.751464	0.422239	0.747493	0.45991	0.501032	0.648648	0.647779	0.553535	0.532218	0.433104	0.504899	0.451616	0.289246	0.586251	0.558071	0.612183	0.636816	0.454779	0.632737	0.633875	0.262322	0.786781	0.45733	0.318431	0.451934	0.605401	0.634704
M_37yrs_OFC	0.600499	0.527019	0.756288	0.760652	0.749857	0.409914	0.745865	0.45863	0.504805	0.651179	0.647255	0.546946	0.546015	0.432473	0.498835	0.458894	0.282772	0.588115	0.561971	0.61238	0.626547	0.455665	0.631798	0.626068	0.272191	0.785896	0.466878	0.329527	0.46034	0.604358	0.633705
M_37yrs_STR	0.573282	0.513179	0.679652	0.665512	0.693939	0.376663	0.676662	0.414025	0.492866	0.602141	0.64811	0.54246	0.519412	0.412389	0.477402	0.444452	0.28583	0.559855	0.530287	0.58655	0.59717	0.431066	0.604794	0.573482	0.250474	0.719052	0.436831	0.326316	0.452282	0.574503	0.609121
M_37yrs_STC	0.598172	0.534978	0.753676	0.762852	0.741903	0.41928	0.74126	0.451136	0.5127	0.660005	0.664733	0.55835	0.548708	0.452943	0.500622	0.461194	0.274985	0.569887	0.561332	0.617865	0.616531	0.452299	0.629439	0.611233	0.277429	0.790445	0.471855	0.340942	0.47652	0.59927	0.629243
M_37yrs_AMY	0.586297	0.50433	0.712105	0.726541	0.694575	0.405876	0.705514	0.446948	0.504736	0.62534	0.643597	0.567598	0.524059	0.418901	0.50156	0.457659	0.290016	0.568556	0.548894	0.598169	0.617546	0.444021	0.615879	0.609256	0.261628	0.753348	0.474212	0.342806	0.466727	0.605486	0.633169
M_37yrs_MFC	0.588254	0.486744	0.746836	0.752912	0.738522	0.40076	0.733768	0.453038	0.489096	0.616084	0.605963	0.564745	0.485276	0.411488	0.51999	0.455266	0.308651	0.589855	0.511883	0.56573	0.642949	0.452757	0.618494	0.632951	0.255844	0.753524	0.478549	0.279938	0.371016	0.619196	0.632216
F_40yrs_DFC	0.564998	0.478458	0.662208	0.692141	0.627567	0.423275	0.646059	0.430294	0.477786	0.611842	0.614259	0.582535	0.526562	0.40817	0.471931	0.436589	0.265896	0.516649	0.52755	0.585192	0.592414	0.439422	0.602071	0.574753	0.270826	0.722382	0.433721	0.316467	0.452208	0.572221	0.604726
F_40yrs_ITC	0.575889	0.496975	0.715727	0.732151	0.69598	0.412694	0.707123	0.444565	0.482336	0.627734	0.614775	0.568967	0.521234	0.411184	0.488532	0.445776	0.265861	0.554908	0.540582	0.591155	0.616862	0.446857	0.608142	0.601333	0.259343	0.747004	0.458471	0.298073	0.43122	0.592446	0.618559
F_40yrs_VFC	0.586118	0.490136	0.749861	0.760674	0.736277	0.436628	0.739856	0.447104	0.492482	0.63995	0.610532	0.563262	0.518903	0.423901	0.505236	0.449232	0.309874	0.612628	0.543454	0.593015	0.636323	0.454466	0.62418	0.626969	0.27268	0.77506	0.479612	0.287527	0.390223	0.597712	0.618218
F_40yrs_MD	0.565325	0.486128	0.66429	0.671851	0.654498	0.418765	0.656877	0.412004	0.484126	0.635688	0.610547	0.573253	0.49724	0.399269	0.481799	0.443721	0.269317	0.545921	0.518604	0.568174	0.570156	0.425779	0.588193	0.543464	0.258653	0.694243	0.435561	0.32319	0.445612	0.594894	0.622783
F_40yrs_AMY	0.56213	0.477459	0.646641	0.66376	0.626268	0.372543	0.639092	0.423811	0.477405	0.623994	0.6106	0.60091	0.515544	0.398934	0.477369	0.446969	0.286518	0.513729	0.52359	0.582434	0.587051	0.429315	0.590769	0.559705	0.267258	0.69995	0.464821	0.310979	0.431269	0.547697	0.587532
F_40yrs_A1C	0.566083	0.493347	0.658617	0.675766	0.638187	0.40803	0.644992	0.425046	0.483779	0.601932	0.61879	0.582612	0.527869	0.420113	0.466616	0.439742	0.244787	0.525383	0.52597	0.591845	0.583148	0.43386	0.600105	0.565378	0.269567	0.719449	0.452043	0.318626	0.453366	0.559945	0.588711
F_40yrs_CBC	0.550034	0.490934	0.61473	0.632462	0.593744	0.444444	0.608628	0.41228	0.464678	0.495121	0.607734	0.498969	0.514136	0.400727	0.438434	0.425039	0.25921	0.520019	0.497932	0.568634	0.53851	0.397487	0.568115	0.489849	0.264678	0.631577	0.38049	0.316148	0.452318	0.539832	0.579907
F_40yrs_V1C	0.584197	0.505537	0.724544	0.740037	0.705816	0.437055	0.711848	0.444827	0.489942	0.614939	0.635893	0.582581	0.538468	0.438039	0.486138	0.444553	0.286287	0.582339	0.547789	0.600817	0.612432	0.447557	0.617714	0.585694	0.262609	0.740979	0.451637	0.300551	0.425918	0.582121	0.610473
F_40yrs_OFC	0.586695	0.493289	0.758525	0.76913	0.745156	0.429635	0.745444	0.446382	0.493773	0.646424	0.606203	0.564639	0.51737	0.418084	0.507051	0.450027	0.254047	0.596153	0.54617	0.600927	0.633255	0.456114	0.623751	0.622875	0.264015	0.775641	0.46091	0.285263	0.401618	0.601896	0.613195
F_40yrs_STC	0.586591	0.493048	0.745458	0.754395	0.733969	0.412214	0.733385	0.443391	0.491839	0.645514	0.618437	0.57848	0.525661	0.418317	0.503173	0.450075	0.255175	0.60487	0.543795	0.601877	0.623724	0.454584	0.625414	0.606539	0.264379	0.769685	0.461214	0.29458	0.418958	0.591955	0.614859
F_40yrs_IPC	0.590166	0.498712	0.758109	0.770315	0.742961	0.463048	0.743836	0.442965	0.496114	0.640901	0.608911	0.566903	0.519155	0.418127	0.50956	0.452298	0.26394	0.581399	0.535923	0.59376	0.639367	0.457684	0.625058	0.627912	0.263336	0.771819	0.468559	0.290182	0.403939	0.593023	0.614363
F_40yrs_M1C	0.556895	0.48161	0.637183	0.65726	0.613544	0.401237	0.625191	0.405397	0.471904	0.58195	0.617424	0.578151	0.513272	0.407339	0.457087	0.426903	0.222875	0.499189	0.51859	0.581649	0.58589	0.430787	0.59476	0.563001	0.266788	0.709193	0.445589	0.305015	0.433119	0.550669	0.57825
F_40yrs_HIP	0.56064	0.468832	0.64619	0.670043	0.618336	0.373358	0.637521	0.433168	0.4664	0.589758	0.583733	0.5967	0.50071	0.379318	0.468694	0.439142	0.277678	0.502259	0.525656	0.576934	0.59647	0.430757	0.589066	0.583467	0.27676	0.70408	0.466288	0.307362	0.422897	0.569401	0.59727
F_40yrs_STR	0.571682	0.506122	0.674308	0.670603	0.677014	0.38158	0.669154	0.427022	0.485803	0.631665	0.609239	0.572668	0.506239	0.40289	0.474108	0.4445	0.278028	0.521527	0.539836	0.591776	0.584053	0.433003	0.603298	0.559128	0.253738	0.709897	0.436429	0.318078	0.444616	0.560182	0.596513
F_40yrs_S1C	0.563507	0.473455	0.664919	0.692222	0.633193	0.413039	0.644078	0.426143	0.476302	0.602003	0.613025	0.577561	0.521468	0.402722	0.469212	0.432545	0.257985	0.534585	0.521278	0.585277	0.605123	0.435706	0.601992	0.587052	0.268398	0.72217	0.427532	0.297699	0.4263	0.569382	0.598929

## Sheet: P_Value
	IQ_GWAS_2018NatGen	IQ_GWAS_2018NatGen_ExNS	ASD_ES_2020Cell	ASD_ES_2020Cell_Predominant	ASD_ES_2020Cell_NDD	ASD_GWAS_2019_Nat_Genet	ASD_SFARI_1	TS_GWAS_2019AJP	Neuroticism_GWAS_2018NatGen	ADHD_GWAS_2019NatGen	ANO_GWAS_2019NatGen	PanicDisorder_GWAS_2019MP	BIP_GWAS_2019NatGen	BIP_GWAS_2021NatGen	MDD_GWAS_2019NatNeu	MDD_GWAS_2024NatGen	OCD_GWAS_2018MP	SZ_ES_2022Nature	SZ_GWAS_2018NatGen_CLZ	SZ_GWAS_2018NatGen_PGC	SZ_GWAS_2022Nature_Prio	SZ_GWAS_2022Nature_Ext	SZ_GWAS_2022Nature_Prot	SZ_GWAS_2022Nature_FM	Epilepsy_GWAS_2018NatCom	Epilepsy_Monogenic_2018NatCom	Epilepsy_GWAS_2018NatCom_prio	AD_GWAS_2021NatGen	AD_GWAS_2019NatGen	PD_GWAS_2019LancetNeu	PD_GWAS_2019LancetNeu_QTL
M_8pcw_Ocx	1.84e-108	4.54e-20	1.78e-30	4.96e-16	2.46e-16	0.000272603	3.41e-70	6.84e-21	2.66e-103	1.74e-06	4.49e-20	3.06e-10	6.17e-31	1.82e-23	2.12e-44	1.1e-94	0.00492343	3.75e-08	5.66e-66	9.03e-76	2.09e-24	6.11e-65	2.14e-102	1.08e-13	1.95e-07	1.11e-25	3.35e-05	7.18e-46	6.81e-20	4.86e-19	1.44e-13
M_8pcw_M1C.S1C	8.75e-115	3.94e-22	2.95e-37	1.49e-19	1.25e-19	0.000251083	9.92e-85	2.18e-21	2.47e-103	2.08e-06	4.33e-21	2.95e-11	1.53e-31	1.49e-24	9.52e-45	8e-97	0.00173572	1.58e-09	9.52e-70	1.38e-77	1.6e-25	2.9e-71	1.13e-107	2.07e-14	4.81e-07	7.33e-27	5.27e-05	3.13e-45	3.48e-20	1e-19	2.66e-14
M_8pcw_AMY	1.01e-117	5.81e-22	3.26e-37	5.15e-19	3.66e-20	0.000562936	1.53e-83	2.03e-19	1.29e-108	1.65e-07	7.62e-22	7.32e-14	7.16e-32	4.27e-24	8.07e-50	6.72e-105	0.000967984	2.03e-09	1.06e-72	9.82e-81	5.22e-28	1.56e-74	1.82e-111	8.77e-17	2.82e-08	2.48e-29	2.27e-06	9.07e-44	4.64e-20	5.01e-20	1.07e-13
M_8pcw_MGE	5.73e-114	3e-20	4.04e-35	2.71e-18	9.41e-19	0.000833651	6.32e-80	1.9e-19	1.1e-107	6.88e-07	2.18e-20	1.05e-13	7.94e-31	9.21e-25	2.13e-48	2.22e-101	0.000589824	6.67e-09	4.27e-70	9.9e-77	2.55e-26	9.22e-71	3.43e-107	1.31e-14	1.93e-08	2.2e-26	4.14e-06	2.88e-43	2.22e-19	2.58e-19	1.23e-13
M_8pcw_STC	4.93e-117	2.6e-21	5.06e-39	1.35e-20	2.35e-20	0.000491003	3.55e-87	2.75e-22	1.56e-107	7.13e-07	6.49e-21	2.26e-12	1.05e-31	1.05e-25	6.86e-50	1.09e-102	0.000479808	2.01e-09	8.43e-73	5.61e-82	5.74e-28	2.04e-72	1.32e-111	1.38e-16	3.09e-08	1.47e-29	7.54e-06	8.82e-49	1.69e-21	5.43e-21	1.45e-14
M_8pcw_URL	3.12e-122	1.05e-22	5.21e-41	1.72e-21	1.83e-21	0.000262915	4.68e-89	8.58e-22	3.85e-109	3.3e-08	3.43e-23	2.04e-11	5.03e-32	7.77e-24	6.14e-49	4.5e-105	0.00032312	1.27e-09	1.94e-73	8.79e-84	9.26e-28	1.8e-71	4.84e-110	1.35e-16	2.95e-09	9.45e-29	2.39e-07	5.05e-54	1.25e-26	1.03e-20	6.26e-15
M_8pcw_CGE	5.12e-114	3.42e-20	2.3e-36	3.33e-19	4.45e-19	0.00077299	3.13e-82	8.98e-21	3.72e-108	7.75e-07	2.57e-20	4.93e-13	8.63e-31	1.96e-24	5.06e-48	9.93e-102	0.00113498	5.99e-09	1.06e-71	6.96e-80	4.7e-27	1.58e-70	3.2e-108	2.53e-15	3.21e-07	5.38e-26	4.86e-05	2.55e-44	4.42e-19	5.49e-19	4.01e-13
M_8pcw_DTH	1.55e-113	1.57e-20	5.8e-36	1.77e-18	1.96e-19	0.000314567	4.11e-78	2.65e-20	6.63e-107	2.06e-07	7.34e-21	7.56e-11	9.19e-31	7.91e-24	1.28e-49	2.3e-100	0.00055421	8.95e-09	2.08e-66	3.8e-74	1.95e-26	5.61e-69	1.52e-104	1.4e-14	1.02e-08	1.39e-25	6.29e-06	2.85e-43	6.34e-20	6.32e-20	4.83e-14
M_8pcw_MFC	7.7e-108	4.51e-19	9.23e-31	9.74e-17	6.83e-16	0.000458432	3.13e-70	3e-21	6.43e-103	3.18e-06	7.68e-20	1.9e-11	1.95e-31	7.87e-24	8.09e-45	3.8e-95	0.000974514	1.64e-07	2.87e-65	9.21e-75	2.9e-25	2.38e-67	7.35e-103	4.69e-14	5.63e-08	6.58e-25	7.17e-06	5.97e-49	7.94e-20	3.13e-19	1.2e-13
M_8pcw_DFC	2.11e-101	1.48e-17	1.18e-27	1.01e-15	8.92e-14	0.00045954	2.22e-62	1.11e-19	1.13e-97	2.51e-06	1.04e-19	1.14e-10	6.12e-31	3.82e-23	5.97e-42	1.88e-90	0.00159206	4.05e-07	1.17e-63	5.43e-73	5.44e-24	2.04e-63	1.85e-98	8.91e-13	1.07e-07	4.65e-23	2.51e-05	4.87e-47	1.15e-19	5.48e-18	3.32e-13
M_8pcw_OFC	1.49e-101	1.27e-18	1.81e-27	2.22e-15	6.24e-14	0.000848034	9.86e-60	9.85e-20	1.72e-99	1.01e-06	3.08e-19	5.73e-12	2.94e-29	1.45e-23	7.59e-44	1.86e-93	9.16e-05	8.6e-07	9.89e-61	1.55e-70	3.46e-24	4.45e-65	2.54e-100	1.38e-13	8.36e-09	9.11e-24	2.02e-06	6.47e-53	6.01e-22	2.75e-19	8.78e-14
M_8pcw_LGE	3.85e-117	4.07e-21	3.28e-39	3.11e-20	6.19e-21	0.00052749	1.02e-88	3.31e-21	1.36e-108	2.97e-07	2.97e-21	1.46e-13	2.69e-31	1.66e-24	3.24e-48	6.72e-105	0.0011452	2.83e-09	2.74e-73	1.11e-80	1.47e-28	9.86e-74	1.32e-112	9.42e-17	3.73e-08	2.45e-28	1.65e-06	2.4e-44	1.94e-19	1.21e-19	1.14e-13
M_8pcw_ITC	2.36e-119	1.29e-22	7.88e-39	2.43e-20	2e-20	0.00025613	1.99e-87	2.93e-21	2.52e-110	2.32e-07	6.67e-22	2.77e-13	4.46e-31	4.85e-25	3.68e-51	9.2e-107	0.000604746	5.38e-10	1.17e-73	3.94e-83	5.69e-29	1.33e-74	4.57e-114	1.49e-17	8.27e-08	1.18e-30	1.52e-06	1.9e-44	3.1e-20	2e-20	1.61e-13
M_8pcw_HIP	2.77e-109	3.65e-20	4.09e-31	1.42e-16	2.01e-16	0.000450852	8.81e-70	2.61e-20	3.34e-102	6.06e-07	2.35e-20	2.27e-10	2.07e-29	6.72e-23	4.44e-44	4.43e-99	0.00026281	1.98e-07	5.26e-66	3.21e-75	4.19e-24	1.99e-66	5.71e-100	4.24e-13	2.78e-07	8.08e-25	2.36e-05	8.59e-49	9.83e-22	2.26e-19	1.96e-14
M_8pcw_VFC	1.96e-112	8.02e-21	4.62e-33	8.42e-18	3.79e-17	0.000417028	2.64e-75	2.55e-21	3.1e-106	1.31e-06	5.12e-20	3.76e-12	8.86e-31	1.16e-25	3.16e-47	9.56e-99	0.00130435	2.04e-08	1.84e-69	5.2e-77	7.93e-26	1.08e-68	2.26e-105	2.36e-14	2.07e-08	3.35e-26	7.65e-06	2e-46	8.38e-20	2.26e-20	2.84e-14
M_8pcw_PCx	1.36e-112	1.93e-20	1.39e-36	1.96e-19	4.6e-19	0.000430279	5.75e-83	3.01e-22	4.21e-104	2.23e-06	1.74e-20	2.47e-11	4.87e-32	2.27e-26	4.67e-46	4.42e-95	0.000657148	5.79e-09	1.81e-72	1.11e-78	6.69e-26	5.05e-71	4.34e-107	1.24e-14	1.77e-07	4.35e-27	3.37e-05	1.09e-45	6.98e-22	3.43e-20	1.53e-14
M_9pcw_DFC	9.63e-114	2.42e-22	9.42e-39	2.96e-20	1.95e-20	0.000390189	2.19e-87	1.95e-20	8.11e-100	2.07e-06	8.32e-22	1.22e-10	1.38e-30	5.71e-25	2.14e-43	4.34e-96	0.00198543	1.84e-09	5.12e-73	2.73e-78	2.55e-26	8.6e-71	1.17e-106	9.95e-16	2.53e-06	2.08e-27	0.000130855	6.51e-45	1.71e-19	9.08e-20	2.76e-14
M_9pcw_MFC	8.73e-116	6.17e-23	2.21e-38	8.98e-20	1.45e-20	0.000424738	1.48e-87	1.54e-21	3.06e-102	1.93e-06	1.09e-22	1.9e-11	2.2e-31	2.3e-23	6.28e-45	3.27e-95	0.00172499	2.09e-09	3.23e-72	1.25e-78	4.66e-27	2.51e-70	2.25e-109	2e-16	3.88e-07	1.56e-28	2.96e-05	4.88e-47	1.23e-20	1.91e-20	2.41e-14
M_9pcw_AMY	8.28e-118	1.73e-22	4.2e-40	1.05e-20	2.33e-21	0.000637559	1.92e-90	5.21e-21	1.06e-109	3.93e-07	1.22e-21	5.15e-14	7.68e-31	2.45e-24	3.6e-51	2.55e-105	0.000722402	7.78e-10	1.56e-73	8.98e-80	1.03e-29	1.87e-78	7.25e-115	4.5e-18	7.52e-08	5.25e-31	2.34e-06	7.28e-41	1.5e-18	2.8e-21	1.13e-14
M_9pcw_DTH	4.63e-122	8.46e-23	3.87e-41	3.58e-20	4.87e-23	0.000171327	5.73e-91	3.7e-20	3.88e-110	1.84e-08	6.87e-22	9.36e-10	5.45e-30	4.56e-24	2.58e-50	4.71e-104	0.000208669	6.25e-10	2.49e-71	3.13e-78	1.22e-28	5.79e-74	6.14e-113	4.09e-17	3.9e-08	2.94e-30	3.99e-06	3.54e-45	1.97e-21	3.49e-22	4.44e-15
M_9pcw_URL	1.02e-123	9.9e-24	5.01e-44	1.23e-22	2.25e-23	9.9e-05	1.41e-94	6.04e-21	2.79e-109	2.39e-08	3.18e-23	3.25e-11	2.64e-31	1.2e-23	3.17e-52	5.48e-107	0.000122157	2.41e-10	1.27e-72	1.6e-83	5.71e-28	2.8e-73	4.5e-113	5.21e-17	3.09e-09	2.13e-31	2.84e-07	1.89e-54	7.79e-26	1.77e-23	1.63e-16
M_9pcw_LGE	1.27e-114	7.12e-22	8.13e-39	7.76e-20	5.96e-21	0.00167261	2.56e-87	1.49e-19	5.12e-103	4.65e-07	2.75e-22	1.78e-12	1.29e-29	9.17e-24	1.28e-46	1.08e-98	0.00305195	5.73e-09	4.62e-72	1.9e-77	3.81e-27	1.14e-73	4.1e-110	5.42e-16	2.64e-06	2.1e-28	0.000115163	3.3e-39	6.08e-17	8.67e-19	4.29e-13
M_9pcw_M1C.S1C	2.59e-112	1.58e-21	4.39e-37	3.85e-19	6.85e-20	0.000693303	6.15e-84	1.02e-20	9.68e-100	2.05e-06	2.84e-22	9.21e-10	3.22e-30	3.6e-23	1.98e-42	5.15e-94	0.00208941	8.85e-09	2.73e-70	8.1e-77	1.62e-25	4.4e-68	1.34e-104	8.99e-15	1.13e-05	9.3e-27	0.000457432	3.49e-43	6.1e-19	2.1e-18	1.78e-13
M_9pcw_MGE	1.71e-118	1.59e-23	3.07e-40	1.7e-20	1e-21	0.000323943	2.17e-91	3.14e-20	3.75e-109	6.21e-07	2.05e-22	7.01e-13	2.19e-30	5.26e-24	8.17e-51	7.98e-106	0.000726759	2.51e-09	1.79e-74	3.16e-79	1.14e-28	5.69e-72	5.34e-112	5.81e-17	3.72e-07	4.08e-30	1.06e-05	1.18e-39	2.37e-18	9.88e-21	6.41e-14
M_9pcw_TCx	9.91e-122	9.53e-23	4.85e-43	3.13e-22	8.81e-23	0.000295981	6.9e-97	4.88e-22	1.22e-109	1.17e-06	1.63e-21	1.26e-10	2.25e-30	1.35e-24	2.19e-50	4.7e-102	0.00116849	2.2e-10	1.27e-73	1.46e-81	4.36e-29	9.07e-73	4.99e-112	1.01e-17	5.16e-07	2.34e-30	2.78e-05	3.5e-47	2.03e-20	3.05e-21	8.5e-15
M_9pcw_HIP	1.14e-116	3.33e-23	6.89e-39	2.69e-20	1.56e-20	0.000186339	5.35e-87	2.92e-21	5.17e-106	6.84e-07	4.29e-22	8.51e-10	8.52e-31	6.34e-24	4.93e-47	1.9e-100	0.000756651	2.64e-09	4.36e-70	1.71e-78	3.96e-28	2.79e-74	8.85e-110	6.44e-17	2.56e-07	1e-29	4.88e-05	2.86e-51	8.05e-22	4.49e-21	5.33e-15
M_9pcw_Ocx	1.8e-118	1.08e-22	1.17e-40	1.22e-20	5.2e-22	0.000433075	4.88e-92	6.92e-22	4.65e-108	1.44e-06	2.86e-21	2.97e-10	7.61e-31	1.48e-24	1.98e-47	9.09e-99	0.00100862	1.17e-09	1.57e-73	8.46e-81	7.06e-27	3.95e-71	1.3e-109	1.36e-15	6.91e-07	2.02e-29	9.57e-05	1.05e-47	5.26e-21	2.84e-20	1.8e-14
M_9pcw_CGE	1.03e-114	3.43e-21	1.39e-36	7.12e-19	1.18e-19	0.000797772	8.56e-83	6.32e-20	3.92e-108	1.23e-06	5.73e-21	4.91e-13	1.71e-30	7.15e-24	2.49e-48	1.32e-101	0.000369287	7.91e-09	1.6e-71	4.3e-78	1.43e-26	2.32e-70	1.02e-107	4.03e-15	6.74e-07	3.03e-27	5.45e-05	3.88e-41	1.44e-19	9.91e-20	6.28e-14
M_9pcw_OFC	1.14e-114	3.8e-22	9.85e-39	5.92e-20	9.76e-21	0.000204122	9.41e-88	2.59e-21	1.18e-104	1.51e-06	7.16e-22	9.96e-11	3.86e-31	9.29e-24	2.79e-43	1.23e-93	0.00153147	2.65e-09	8.25e-73	7.57e-79	4.65e-26	4.89e-72	3.91e-109	2.34e-15	1.81e-07	3.24e-29	1.38e-05	8.18e-51	1.73e-22	4.11e-20	1.78e-14
M_9pcw_PCx	3.75e-119	3.19e-23	1.27e-41	1.27e-21	5.9e-22	0.000380753	3.37e-93	2.48e-21	1.68e-105	1.28e-06	3.12e-21	8.21e-11	1.82e-31	3.77e-25	2.63e-48	1.43e-99	0.000664659	6.92e-10	3.03e-72	1.97e-80	6.36e-28	2.35e-72	1.05e-110	6.78e-17	2.65e-07	4.69e-30	2.42e-05	3.47e-46	1.32e-20	1.19e-20	1.42e-14
F_12pcw_HIP	9.35e-114	1.36e-22	7.77e-35	7.86e-19	6.73e-18	0.000508378	1.79e-78	4.94e-20	2.58e-99	4.31e-07	4.73e-22	1.36e-11	1.11e-30	1.18e-23	2.07e-44	5.65e-100	0.000603197	3.98e-09	1.53e-69	1.1e-77	1.19e-27	3.54e-72	6.5e-110	5.27e-16	2.27e-08	4.2e-29	1.82e-06	5.27e-46	1.47e-21	1.35e-20	1.4e-14
F_12pcw_DTH	8.63e-122	4.81e-24	3.59e-41	1.29e-20	1.41e-22	0.00015612	1.64e-91	6.18e-19	1.28e-103	3.73e-08	4.28e-23	1.51e-12	2.73e-32	2.03e-24	8.04e-46	7.82e-103	0.00176202	1.1e-09	2.1e-79	2.59e-85	5.71e-29	6.65e-78	2.07e-117	5.13e-18	3.8e-08	7.47e-31	1.12e-06	2.76e-47	1.68e-22	4.09e-19	3.34e-13
F_12pcw_AMY	1.27e-114	2.26e-21	4.25e-37	9.49e-20	2.91e-19	0.000926113	1.18e-82	5.45e-20	2.81e-105	5.74e-07	2.55e-21	6.54e-13	1.57e-30	1.8e-24	4.37e-47	3.73e-103	0.000756417	4.23e-09	2.6e-74	3.79e-81	1.24e-27	2.6e-74	2.78e-112	3.32e-16	2.98e-07	3.91e-29	8.24e-06	9.48e-42	3.19e-20	1.33e-19	9.3e-14
F_12pcw_A1C	3.13e-124	6.61e-24	6.78e-42	2.15e-22	1.97e-21	4.28e-05	4.96e-93	1.69e-21	2.82e-101	8.11e-08	6.64e-23	8.54e-11	6.59e-31	5.7e-22	2.7e-43	4.35e-98	0.00180041	2.46e-10	2.37e-76	1.89e-83	4.24e-28	2.69e-74	1.73e-112	2.28e-17	1.14e-08	1.41e-31	4.82e-07	3.61e-45	1.53e-20	4.29e-20	8.04e-14
F_12pcw_V1C	7.14e-122	2.22e-24	9.43e-41	2.4e-22	2.54e-20	4.15e-05	4.31e-91	8.44e-22	5.17e-100	3.38e-07	1.4e-23	2.68e-10	1.09e-30	5.65e-22	3.25e-43	3.61e-99	0.000607909	5.23e-09	3.17e-74	1.98e-82	4.75e-27	2.58e-73	2.88e-113	4.33e-16	1.97e-08	2.21e-30	4.84e-07	3.49e-52	2.43e-23	2.51e-20	1.69e-14
F_12pcw_MFC	2.56e-123	4.81e-24	4.5e-43	4.1e-23	6.82e-22	1.15e-05	4.27e-96	3.41e-24	1.82e-102	4.14e-07	1.58e-22	5e-10	4.1e-31	8.94e-23	3.58e-44	4.77e-100	0.000702361	2.32e-10	3.89e-75	1.95e-82	1.47e-27	3.97e-78	8.24e-115	1.31e-16	3.04e-08	4.18e-32	4.82e-07	1.75e-49	6.14e-21	2.58e-22	2.19e-15
F_12pcw_STR	2.16e-115	5.05e-20	9.13e-37	5.02e-19	1.1e-19	0.000114923	4.16e-80	7.66e-20	1.05e-104	4.91e-08	5.67e-20	1.43e-12	1.1e-27	1.28e-22	2.37e-51	3.26e-103	7.7e-05	2.53e-09	1.06e-67	4.52e-76	1.69e-30	9.25e-76	5.43e-111	2.68e-18	6.65e-09	4.15e-30	4.69e-07	2.25e-41	6.42e-19	1.41e-21	3.86e-15
F_12pcw_M1C	3.44e-124	7.8e-24	1.64e-42	1.33e-22	7.59e-22	3.45e-05	1.15e-94	1.66e-21	5.35e-103	1.71e-07	2.28e-22	4.13e-10	8.56e-31	4.83e-24	5.4e-44	2.45e-97	0.000345385	4.22e-10	2.78e-76	8.6e-84	7.14e-27	6.2e-74	1.75e-113	4.15e-16	6.43e-09	5.26e-32	5.78e-07	7.92e-48	4.8e-21	3.73e-21	1.17e-14
F_12pcw_DFC	8.83e-125	8.16e-24	2.03e-43	3.41e-23	3.67e-22	4.04e-05	7.47e-96	2.22e-22	1.86e-103	5.27e-07	4.56e-22	3.26e-10	4.52e-30	5.52e-24	2.19e-45	1.81e-101	0.000127327	1.16e-10	3.58e-77	1.44e-82	1.75e-27	1.72e-74	2.35e-114	1.47e-16	2.01e-08	1.96e-32	3.89e-07	1.9e-47	8.04e-21	2.58e-22	1.34e-15
F_12pcw_ITC	1.12e-122	6.62e-23	5.24e-41	2.23e-21	1.4e-21	4.82e-05	3.83e-91	2.39e-21	9.88e-104	2.31e-07	7.98e-22	6.4e-12	2.57e-30	2.47e-23	2.52e-46	1.1e-100	0.000368984	3.45e-10	3.69e-75	1.81e-83	2.36e-29	2.94e-74	2e-113	8.49e-18	3.03e-08	7.46e-32	1.5e-06	7.52e-47	2.96e-21	1.64e-21	1.07e-14
F_12pcw_VFC	3.65e-126	7.28e-25	9.09e-43	7e-23	8.06e-22	4.24e-05	2.94e-95	4.51e-22	8.96e-100	3.93e-07	8.19e-23	1.78e-10	1.23e-30	1.8e-23	4.8e-45	2.14e-99	0.000271949	9.9e-10	7.48e-77	2.81e-83	3.17e-27	2.76e-74	2.63e-113	2.72e-16	4.58e-09	1.06e-31	9.99e-07	1.88e-46	1.42e-20	1.27e-21	1.17e-15
F_12pcw_STC	2.75e-124	1.43e-24	8.13e-43	5.03e-23	1.01e-21	7.2e-05	3.74e-95	1.44e-22	1.39e-101	8.04e-08	4.21e-23	2.21e-10	3.2e-31	1.25e-22	1.16e-43	1.09e-96	0.000268857	4.29e-10	2.68e-76	1.25e-83	1.97e-27	4.31e-74	9.01e-113	7.49e-17	3.28e-08	7.69e-32	1.26e-06	1.35e-44	7.26e-22	2.61e-20	9.14e-14
F_12pcw_IPC	1.8e-126	1.52e-24	3.73e-43	3.18e-23	7.32e-22	4.88e-05	3.02e-95	4.76e-22	6.79e-99	8.29e-08	1.53e-22	5.48e-10	2.59e-30	7.86e-22	2.73e-43	3.99e-97	0.000750733	1.58e-09	1.63e-73	5.59e-82	1.7e-27	3.66e-74	2.66e-113	9.98e-17	9.07e-09	1.36e-31	4.96e-07	1.02e-45	3.63e-20	5.03e-21	8.33e-15
F_12pcw_OFC	6.85e-124	1.09e-23	2.16e-41	3.71e-22	3.67e-21	4.34e-05	4.5e-93	1.27e-21	7.06e-104	4.37e-07	6.28e-22	8.81e-11	1.44e-31	1.85e-23	1.26e-45	7.95e-100	0.000353084	3e-10	1.73e-75	1.99e-82	2.24e-27	4.45e-74	2.01e-112	3.22e-16	1.13e-08	3.6e-31	1.52e-06	4.04e-48	4.42e-20	2e-21	1.07e-14
F_12pcw_S1C	3.79e-122	5.18e-24	4.74e-42	8.82e-23	3.41e-21	2.18e-05	8.95e-93	1.02e-20	7.11e-98	1.75e-07	6.94e-23	5.98e-10	1.86e-29	3.07e-22	4.81e-41	1.1e-96	0.00137067	6.12e-10	5.6e-75	3.14e-81	7.58e-27	1.87e-73	3.77e-111	5.75e-16	2.78e-08	2.49e-31	1.03e-06	1.09e-42	3.05e-19	3.28e-21	1.01e-14
F_12pcw_STC.1	9.5e-125	1.66e-22	6.41e-41	6.06e-22	6.7e-21	4.34e-05	5.81e-91	1.08e-21	1.36e-101	7.2e-08	1.6e-21	1.73e-10	9.67e-30	9.16e-24	5.36e-44	2.96e-99	0.00259783	4.29e-10	4.45e-75	2.51e-83	6.48e-29	4.26e-75	2.8e-113	7.9e-18	1.56e-08	4.98e-32	6.32e-07	9.03e-46	1.03e-20	2.09e-21	7.97e-15
F_12pcw_V1C.1	3.32e-122	4.09e-23	1.72e-42	2.8e-23	3.88e-21	7.92e-05	1.73e-94	3.57e-23	3.01e-104	3.14e-07	5.22e-22	5.62e-10	1.6e-31	4.27e-24	2e-44	2.81e-100	0.00135054	6.69e-10	4.41e-77	5.76e-84	7.75e-28	2.94e-77	8.58e-116	8.09e-17	2.2e-08	7.54e-32	2.26e-06	5.41e-49	8.48e-21	4.3e-21	3.77e-15
F_12pcw_A1C.1	1.11e-124	2.37e-23	7.38e-43	8.71e-23	5.2e-22	2.83e-05	4.47e-96	8.56e-24	4.7e-100	4.39e-08	3.04e-21	2.34e-10	2.14e-28	6.62e-22	3.64e-44	7.67e-102	0.00123091	4.12e-10	2.29e-73	3.07e-78	1.87e-30	7.31e-78	3.64e-115	6.3e-19	1.09e-08	6.72e-33	2e-07	2.93e-42	2.83e-17	1.13e-22	6.83e-15
F_12pcw_CB	5.18e-127	4.59e-24	4.66e-45	9.84e-23	2.4e-24	6.36e-05	1.07e-96	2.67e-22	1.26e-105	8.26e-09	2.29e-22	1.97e-11	4.97e-30	5.26e-22	4.9e-52	3.42e-111	3.57e-05	4.01e-10	1.62e-73	4.92e-84	1.09e-30	1.62e-77	8.2e-116	8.85e-19	3.72e-09	2.18e-32	3.45e-07	1.44e-44	2.68e-20	3.42e-25	2.57e-17
F_12pcw_ITC.1	2.51e-125	1.32e-22	2.3e-42	2.42e-22	5.77e-22	5.58e-05	8.73e-95	1.18e-22	1.86e-104	1.03e-07	1.48e-20	2.14e-11	1.34e-29	1.02e-22	6.57e-46	7.03e-100	0.000994636	2.7e-10	2.52e-73	1.52e-82	2.6e-29	1.26e-75	2.11e-115	2.83e-18	5.93e-09	2.99e-32	1.23e-06	7.45e-46	1.58e-20	6.07e-22	2.13e-15
F_12pcw_IPC.1	6.21e-123	2.3e-22	5.65e-42	6.87e-23	5.24e-21	3.47e-05	2.66e-93	5.26e-22	5.87e-101	6.25e-08	2.13e-21	1.13e-10	3.53e-30	2.42e-23	1.04e-44	1.81e-99	0.00140975	1.43e-09	1.37e-74	4.96e-84	6.71e-29	6.55e-77	2.36e-115	9.14e-18	5.29e-09	1.4e-32	1.36e-07	4.92e-43	2.11e-18	1.16e-21	7.4e-15
F_12pcw_S1C.1	6.64e-124	5.85e-24	6.05e-41	4.31e-22	8.97e-21	3.82e-05	1.1e-91	3.95e-22	5.39e-101	1.66e-07	5.38e-22	1.75e-10	5.96e-31	4.88e-23	1.5e-42	1.18e-97	0.00211127	3.41e-10	1.65e-73	4.65e-83	2.47e-28	3.09e-76	8.16e-112	5.98e-17	1.02e-08	4.75e-31	2e-06	9.93e-42	1.79e-17	1.21e-21	4.43e-15
F_12pcw_DTH.1	7.86e-126	2.89e-22	1.01e-41	6.51e-21	7.88e-23	5.6e-05	3.56e-91	8.78e-21	3.32e-104	4.64e-09	4.31e-22	4.77e-10	1.3e-30	3.15e-23	3.41e-49	3.38e-108	0.000156934	2.22e-09	1.74e-69	5.52e-79	5.86e-31	7.31e-76	1.28e-115	1.19e-18	1.2e-09	3.51e-33	5.09e-07	1.08e-42	3.54e-21	1.53e-23	3.22e-16
F_12pcw_HIP.1	3.11e-121	3.22e-22	7.66e-38	5.49e-20	8.86e-20	0.000180918	5.68e-87	2.61e-21	4.35e-106	2.25e-07	2.7e-21	8.07e-13	1.18e-30	1.12e-22	2.48e-46	4.39e-105	0.00204925	1.11e-09	3.46e-72	1.28e-82	1.66e-30	8.47e-77	5.42e-116	1.73e-18	7.95e-08	1.34e-31	1.94e-06	1.22e-47	9.82e-21	4.21e-22	1.26e-15
F_12pcw_DFC.1	2.07e-126	1.35e-24	5.97e-42	2.36e-22	1.58e-21	2.88e-05	2.29e-93	1.67e-23	9.32e-102	1.03e-07	3.09e-21	6.06e-11	5.14e-30	1.5e-22	8.9e-46	6.95e-102	0.000342087	9.43e-11	7.73e-73	1.37e-81	3.93e-30	3.14e-77	6e-114	3.16e-18	1.38e-08	1.93e-31	4.38e-07	2.69e-41	5.64e-17	2.54e-22	1.08e-14
F_12pcw_OFC.1	1.33e-119	4.8e-22	2.45e-39	2e-21	8e-20	5.11e-05	9.43e-88	3.86e-22	5.59e-99	1.18e-06	1.04e-20	8.39e-11	3.52e-29	2.75e-21	4.39e-46	6.82e-104	0.000433265	8.08e-10	4.54e-72	8.02e-80	5.75e-29	2.37e-76	1.04e-113	6.59e-17	3.72e-08	1.94e-31	3.17e-06	1.16e-41	1.02e-15	1.15e-21	3.15e-14
F_12pcw_M1C.1	3.71e-126	2.98e-25	2.17e-43	2.69e-23	5e-22	3.49e-05	3.72e-98	2.35e-21	4.84e-102	1.53e-07	8.73e-23	4.35e-10	1.65e-31	4.24e-24	3.37e-43	4.99e-96	0.00104753	1.77e-10	5.42e-77	3.12e-85	5.72e-28	5.72e-77	1.47e-116	5.26e-17	2.46e-08	1.4e-32	2.76e-06	2.45e-43	4.19e-19	1.23e-21	2.67e-15
F_12pcw_VFC.1	2.85e-122	1.34e-21	5.41e-39	4.79e-21	7.35e-20	3.64e-05	3.6e-88	1.96e-22	3.38e-97	2.44e-07	1.94e-21	1.83e-10	1.19e-29	1.24e-21	1.96e-41	1.65e-99	0.000946238	1.84e-09	4.43e-73	6.96e-82	5.43e-28	1.38e-75	5.08e-114	1.25e-16	6.81e-09	5.28e-31	1.22e-06	2.62e-44	1.93e-18	2.48e-22	6.65e-15
F_12pcw_AMY.1	1.81e-121	2.28e-23	5.11e-40	8.67e-21	3.51e-21	0.000470567	8e-90	6.45e-22	7.01e-109	9.64e-08	4.18e-22	2.89e-13	6.55e-31	6.45e-24	1.09e-51	4.16e-106	0.000247076	9.33e-10	3.39e-78	6.57e-85	2.76e-31	7.7e-84	7.37e-120	8.18e-20	1.3e-08	3.24e-32	4.71e-07	3.37e-45	3.93e-22	2.33e-22	4.15e-15
F_12pcw_STR.1	1.33e-116	2.41e-22	2.16e-35	1.73e-17	6.35e-20	0.00035633	1.73e-79	1.51e-19	4.57e-104	6.31e-08	7.97e-21	2.82e-12	3.1e-30	9.84e-23	7.36e-48	2.38e-103	0.000309474	2.94e-09	2.77e-70	2.24e-77	3.99e-29	1.69e-75	3.87e-113	2.43e-17	3.85e-07	3.22e-29	9.1e-06	7.96e-43	2.85e-19	1.03e-19	5.89e-13
F_12pcw_AMY.2	4.97e-118	8.63e-22	9.7e-38	7.76e-20	7.86e-20	0.000569068	1.53e-85	9.07e-21	5.66e-107	1.72e-07	2.87e-20	2.15e-13	1.04e-30	1.96e-24	1.17e-51	1.05e-107	0.000239322	1.26e-09	3.58e-74	2.26e-82	7.09e-31	1.06e-80	1.63e-116	6.76e-19	1.59e-08	1.96e-31	3.23e-07	3.03e-41	3.97e-19	6.25e-22	7.86e-15
F_12pcw_M1C.2	3.77e-122	1.98e-22	4.54e-40	1.12e-21	2.62e-20	2.96e-05	2.31e-90	1.01e-20	2.43e-95	1.3e-07	7.02e-21	7.59e-10	3.08e-28	2.45e-20	2.29e-43	3.34e-96	0.00177806	2.1e-09	3.75e-70	1.03e-79	8.53e-28	2.81e-72	1.7e-110	3.05e-16	1.49e-08	1e-29	2.12e-06	2.95e-40	1.23e-16	1.11e-20	1.96e-14
F_12pcw_ITC.2	3.59e-119	2.09e-21	1.24e-37	9.81e-21	8.44e-19	7.56e-05	5.09e-84	3.5e-23	9.54e-99	1.19e-07	2.2e-20	1.59e-10	3.38e-29	2.78e-21	1.42e-44	2.59e-97	0.00119308	2.8e-09	2.36e-71	1.18e-80	1.93e-28	2.86e-71	5.32e-110	8.51e-17	3.39e-08	1.26e-29	1.3e-06	6.33e-42	1.4e-19	3.01e-21	3.16e-14
F_12pcw_VFC.2	3e-121	5.2e-22	1.33e-36	5.28e-20	1.7e-18	5.52e-05	4.22e-83	2.64e-20	7.45e-98	2.03e-07	3.97e-22	1.79e-11	9.91e-29	3.38e-22	1.92e-45	7.13e-96	0.000434101	2.05e-09	3.12e-69	3.01e-79	9.12e-28	3.75e-71	5.23e-109	4.34e-16	1.66e-08	9.54e-29	3.83e-06	4.52e-41	3.47e-18	4.38e-21	1.56e-14
F_12pcw_STR.2	1.44e-120	4.9e-22	1.55e-41	6.41e-21	1.25e-22	8.79e-05	1.21e-92	1.48e-19	6.04e-105	3.65e-08	5.87e-21	9.51e-13	2.45e-31	4.69e-24	2.86e-49	5.05e-105	0.000820562	2.35e-10	1.98e-77	5.45e-85	3.81e-30	8.61e-79	6.82e-119	1.82e-18	2.09e-08	3.1e-31	3.54e-07	1.53e-46	1e-20	1.85e-20	6.83e-14
F_12pcw_CBC	1.14e-116	7.43e-21	2e-38	8.4e-20	1.4e-20	0.000100767	1.1e-81	5.24e-21	8.28e-104	1.43e-08	1.01e-20	3.88e-11	8.04e-30	7.41e-22	3.97e-51	2.01e-103	0.000103854	2.68e-09	1.11e-69	8.78e-81	1.65e-28	2.43e-73	2.86e-110	1.17e-16	1.22e-08	2.17e-28	3.48e-07	2.7e-45	1.23e-20	1.05e-21	3.48e-15
F_12pcw_DTH.2	1.31e-116	2.22e-20	2.26e-36	4.52e-19	3.17e-19	6.96e-05	2.79e-79	6.13e-19	1.87e-100	1.62e-08	2.09e-20	1.68e-11	1.4e-29	8.67e-21	1.31e-47	5.18e-106	0.000304662	2.2e-08	4.84e-69	2.9e-77	4.78e-29	3.77e-73	2.71e-111	4.6e-17	3.32e-09	1.39e-30	2.2e-07	1.42e-44	1.11e-19	5.15e-22	2.97e-15
F_12pcw_DFC.2	1.53e-120	2.85e-22	5.25e-40	6.89e-22	4.95e-20	3.3e-05	7.51e-90	4.07e-20	8.43e-101	4.7e-07	4.08e-21	1.59e-10	1.78e-29	3.12e-23	8.14e-46	1.55e-98	0.00343565	4.34e-10	3.8e-71	4.73e-81	3.27e-27	2.7e-73	1.18e-109	1.37e-15	4.61e-08	6.37e-30	3.47e-06	2.19e-39	5.94e-16	8.56e-21	4.18e-14
F_12pcw_OFC.2	2.27e-123	3.22e-23	4.13e-41	3.45e-22	7.62e-21	4.53e-05	2.38e-93	3.83e-21	1.6e-101	5.07e-07	7.38e-21	3.49e-10	3.77e-30	3.57e-23	1.55e-46	1.48e-98	0.00102777	2.02e-10	3.44e-73	3.58e-80	2.96e-28	2.54e-74	2.13e-111	8.22e-17	3.56e-08	5.21e-30	4.2e-06	3.75e-40	2.34e-15	1.6e-21	4.67e-14
F_12pcw_S1C.2	8.67e-123	1.27e-22	1.34e-39	1.74e-21	5e-20	4.2e-05	2.94e-89	4.28e-22	2.26e-100	5.65e-08	1.39e-21	4.58e-10	3.23e-29	4.14e-22	2.74e-43	5.77e-96	0.00155315	6.76e-10	1.89e-72	6.86e-80	4.04e-28	1.69e-73	2.74e-111	1.07e-16	1.3e-08	1.42e-29	9.87e-07	1.05e-39	1.73e-17	1.09e-20	3.49e-14
F_12pcw_V1C.2	3.78e-122	4.61e-23	9.88e-43	1.39e-23	4.5e-21	3.03e-05	1.63e-94	5.69e-22	2.22e-102	2.67e-07	4.59e-22	2.66e-10	7.19e-31	6.69e-25	3.65e-45	1.04e-99	0.000523053	1.83e-10	2.22e-72	5.15e-83	1.22e-27	8.28e-74	5.68e-111	3.26e-16	1.14e-07	8.78e-31	3.21e-06	1.8e-45	3.11e-19	1.38e-21	1.11e-14
F_12pcw_MFC.1	2.64e-123	4.31e-23	8.93e-43	2.43e-23	2.32e-21	1.04e-05	2.51e-95	3.7e-21	9.5e-102	4.88e-07	1.48e-21	4.22e-10	1.33e-29	4.44e-23	1.68e-44	4.8e-100	0.000505883	1.66e-10	1.23e-74	5.12e-82	3.82e-27	6.91e-74	3.9e-111	8.81e-16	2.42e-08	2.51e-31	8.74e-07	1.32e-41	2.05e-18	2.36e-21	9.41e-15
F_12pcw_HIP.2	1.09e-118	2.65e-22	1.13e-39	3.06e-21	2.36e-20	0.000115426	3.06e-89	1.81e-20	5.7e-106	6.69e-07	1.53e-21	3.14e-11	5.43e-30	1.15e-23	4.26e-47	7.12e-103	0.000357988	3.21e-10	9.47e-73	1.81e-81	2.59e-28	8.71e-76	6.52e-112	1.16e-16	6.64e-08	9.45e-31	2.66e-06	3.59e-47	9.41e-21	9.21e-21	3.13e-14
F_12pcw_IPC.2	1.28e-116	1.43e-20	4.04e-36	5.54e-20	4.95e-18	4.78e-05	4.09e-81	5.02e-22	2.96e-93	6.61e-08	1.61e-20	1.98e-10	5.11e-28	4.1e-21	5.74e-43	1.25e-96	0.0023648	1.6e-08	2.29e-67	4.2e-78	1.55e-27	1.73e-72	3.15e-109	1.63e-16	3.63e-08	5.42e-28	5.6e-07	3.32e-40	6.64e-17	2.63e-20	1.9e-13
F_12pcw_A1C.2	8.74e-123	1.15e-21	1.08e-41	1.84e-22	3.72e-21	6.77e-05	8.44e-93	7.96e-22	2.89e-99	1.13e-07	4.91e-21	2.43e-10	1.87e-29	7.88e-22	3.3e-44	3.3e-99	0.000532702	1.87e-10	2.29e-74	3.49e-80	7.59e-29	7.94e-73	1.59e-109	2.91e-17	6.32e-09	2.95e-30	4.32e-07	2.17e-39	1.95e-16	4.4e-21	1.34e-13
M_13pcw_STR	3.63e-122	1.07e-22	7.62e-44	8.06e-22	4.51e-24	6.18e-05	1.57e-96	3.07e-20	4.12e-103	2.33e-08	1.31e-21	6.48e-13	1.71e-31	1.99e-24	1.38e-47	1.02e-105	0.000263697	3.56e-10	2.46e-79	2.47e-84	3.95e-30	4.3e-81	3.1e-121	9.86e-19	6.19e-08	2.47e-32	1.82e-06	5.85e-49	5.86e-23	1.54e-20	1.4e-14
M_13pcw_M1C	1.11e-126	2.57e-24	3.58e-44	1.7e-23	1.28e-22	3.18e-05	2.14e-98	6.3e-22	1.36e-101	4.5e-08	8.79e-22	8.16e-11	3.26e-30	7.67e-23	1.28e-43	5.45e-100	0.00150568	1.22e-10	1.38e-75	1.55e-83	1.2e-29	1.99e-78	1.57e-114	4.01e-18	3.09e-08	5.6e-32	8.49e-07	6.12e-40	1.47e-18	3.6e-20	6.99e-14
M_13pcw_AMY	7.34e-124	6.98e-24	3.46e-43	1.43e-22	1.42e-22	7.41e-05	2.7e-97	1.73e-22	1.01e-102	1.72e-07	3.62e-21	2.83e-11	2.27e-30	7.58e-23	5.77e-45	4.83e-103	0.000445799	1.06e-09	3.46e-79	3.25e-86	1.95e-28	3.69e-78	2.26e-117	7.57e-17	1.64e-07	8.5e-33	4.94e-06	9.95e-44	5.29e-19	3.33e-20	3.87e-14
M_13pcw_S1C	6.9e-127	2.65e-23	8.65e-44	2.84e-23	1.85e-22	2.77e-05	2.43e-97	6.74e-22	7.04e-98	3.9e-08	2.88e-22	2.63e-10	2.21e-30	4.39e-23	2.21e-42	3.24e-96	0.00138751	4.93e-10	2.07e-75	1.8e-84	1.67e-29	2.29e-77	3.96e-115	3.46e-18	3.3e-08	5.25e-32	5.62e-07	1.98e-40	3.03e-18	3.3e-20	1.19e-13
M_13pcw_V1C	2.01e-124	1.81e-25	3.59e-44	7.7e-24	2.89e-22	4.34e-05	1.78e-97	8.88e-22	5.32e-101	1.46e-07	4.45e-23	5.91e-10	2.7e-31	3.15e-24	5.19e-42	1.35e-99	0.000619345	1.74e-10	3.17e-78	2.07e-84	2.44e-28	3.36e-77	8.44e-114	2.81e-17	1.15e-07	1.04e-31	1.64e-06	2.85e-45	1.41e-19	2.53e-20	2.39e-14
M_13pcw_A1C	1.24e-122	5.75e-22	9.67e-41	5.89e-22	1.05e-20	5.21e-05	4.11e-91	8.67e-22	1.8e-103	1.14e-07	1.98e-21	1.12e-11	1.3e-29	7.13e-24	3.95e-48	1.87e-104	0.000440594	3.54e-10	4.72e-76	9.49e-84	4.14e-30	9.78e-75	1.26e-114	1.07e-17	2.02e-07	8.16e-31	6.08e-06	1.08e-41	2.12e-18	6.34e-21	4.14e-14
M_13pcw_HIP	1.09e-116	1.24e-21	2.02e-37	5.09e-20	2.59e-19	7.42e-05	4.25e-84	3.76e-21	2.64e-101	2.03e-07	1.86e-21	1.83e-11	1.28e-29	3.6e-23	5.58e-46	1.15e-102	0.00027714	5.64e-10	5.88e-75	2.27e-81	1.89e-28	2.07e-74	6.28e-113	6.74e-17	1.89e-08	1.09e-31	1.71e-06	2.08e-45	5.88e-21	2.75e-20	1.32e-14
M_13pcw_VFC	3.47e-128	8.27e-25	8.41e-44	2.34e-23	2.2e-22	2.2e-05	3.91e-98	3.88e-22	1.41e-100	6e-08	6.4e-22	5.49e-11	1.32e-31	4.31e-23	1.52e-41	1.76e-100	0.000309986	1.44e-10	1.42e-76	5.91e-86	4.32e-30	6.55e-77	3.37e-116	1.06e-18	2.06e-08	6.11e-32	2.28e-06	1.09e-41	1.77e-18	2.06e-20	6.15e-14
M_13pcw_MFC	2.56e-125	3.04e-23	1.11e-41	2.22e-22	3.16e-21	1.71e-05	8.18e-95	6.63e-22	1.38e-98	1.91e-07	1.73e-21	2.8e-11	1.94e-30	2.26e-22	6.24e-45	1.92e-101	0.000223205	1.05e-09	5.85e-75	3.58e-82	4.81e-29	2.36e-76	5.68e-115	2.2e-17	6.95e-09	2.71e-31	2.09e-06	1.61e-39	6.88e-16	8.59e-21	1.12e-14
M_13pcw_STC	1.05e-124	4.16e-24	1.3e-43	2.26e-23	3.55e-22	4.97e-05	2.77e-96	5.22e-22	7.04e-105	1.01e-07	1.28e-22	3.12e-10	1.64e-30	4.18e-25	1.39e-45	1.55e-102	0.000317723	1.05e-10	5.72e-76	2.85e-83	3.6e-29	1.19e-77	2.04e-115	4.15e-18	3.42e-08	1.81e-31	2.53e-07	2.5e-43	3.19e-20	5.39e-21	3.63e-14
M_13pcw_OFC	1.94e-122	5.08e-23	1.07e-40	8.45e-22	8.06e-21	6.31e-05	6.86e-92	5.38e-21	3.83e-103	2.08e-07	2.64e-21	4.09e-12	2.65e-30	1.93e-23	1e-47	2.69e-103	0.000250832	6.3e-10	3.96e-76	3.69e-84	3.87e-29	5.53e-73	2.64e-113	2.35e-17	4.66e-08	2.25e-31	6.91e-06	5.5e-40	4.95e-17	2.53e-21	2.55e-14
M_13pcw_IPC	1.2e-126	4.07e-24	4.18e-45	3.15e-24	8.14e-23	3.45e-05	8.74e-100	7.74e-24	3.8e-100	7.07e-08	3.22e-22	3.28e-10	1.1e-30	2.36e-22	8.32e-43	1.08e-99	0.000573838	1.25e-10	1.29e-76	3.24e-84	3.55e-29	1.16e-79	1.07e-116	9e-18	5.23e-08	3.81e-32	8.87e-07	2.34e-41	1.92e-19	1.52e-20	3.4e-14
M_13pcw_DFC	6.52e-127	2.36e-23	1.39e-42	1.61e-22	5.25e-22	1.05e-05	1.51e-96	4.58e-23	1.09e-99	9.47e-08	2.44e-21	4.75e-11	5.38e-31	4.16e-23	2.43e-44	2.44e-101	0.00147596	2.53e-10	4.04e-77	6.2e-85	2.13e-29	2.59e-76	4.69e-115	8.83e-18	4.28e-08	1.03e-31	2.86e-06	6.9e-39	6.62e-18	7.01e-20	5.39e-14
M_13pcw_ITC	8.88e-125	2.05e-24	5.67e-43	7.28e-23	4.79e-22	5.37e-05	2.72e-96	2.08e-21	5.19e-106	1.33e-07	1.21e-22	1.13e-10	4.02e-32	7.7e-25	3.07e-44	6.19e-104	0.00169086	3.34e-10	9.29e-79	2.86e-86	2.78e-28	2.52e-77	2.32e-116	6.58e-17	8.92e-08	1.4e-32	5.28e-06	2.76e-44	2.27e-17	4.82e-20	2.2e-14
F_13pcw_STR	1.44e-120	1.9e-24	4.6e-41	9.73e-21	2.5e-22	0.000277569	8.14e-92	1.13e-19	7.26e-110	7.51e-08	4.43e-24	1.68e-12	1.31e-33	1.49e-26	1.06e-47	2.6e-105	0.00116827	1.79e-09	1.36e-79	9.83e-87	5.44e-29	2.99e-77	5.21e-119	3.84e-18	6.31e-08	1.51e-31	7.65e-06	4.91e-50	4.08e-24	5.45e-20	6.62e-14
F_13pcw_S1C	3.76e-128	5.73e-26	8.26e-43	5.31e-23	9.71e-22	1.44e-05	1.09e-96	1.23e-22	2.64e-103	9.25e-08	7.74e-25	3.5e-10	2.4e-32	9.78e-24	7.57e-43	4.25e-100	0.00168721	3.17e-10	6.83e-78	1.22e-84	2.65e-27	3.9e-74	8.48e-114	7.09e-17	1.59e-08	7.53e-32	1.85e-06	1.71e-46	8.31e-21	4.42e-21	6.54e-15
F_13pcw_V1C	2.55e-124	1.32e-24	6.17e-42	5.4e-23	7.29e-21	5.95e-05	2.47e-94	4.69e-22	2.46e-107	2.1e-07	8.05e-25	4.34e-10	8.84e-33	1.12e-24	1.74e-44	9.23e-104	0.00151078	1.34e-09	4.21e-78	3.38e-85	4.21e-27	1.22e-75	1.68e-115	2.97e-16	5.38e-08	3.54e-32	3.18e-06	5.92e-53	7.53e-23	5.69e-20	1.96e-14
F_13pcw_AMY	1.38e-122	2.77e-24	6.89e-41	3.37e-21	1.2e-21	0.000399794	4.95e-93	6.76e-22	2.64e-110	2.82e-07	1.06e-23	2.66e-13	4.58e-32	9.41e-26	1.24e-48	6.38e-107	0.00116616	7.79e-10	8.05e-82	1.52e-87	7.33e-29	1.36e-77	3.34e-118	1.01e-17	4.39e-08	2.04e-32	3.38e-06	1.72e-46	3.11e-21	2.01e-20	3.83e-14
F_13pcw_IPC	1.79e-126	6.07e-25	5.52e-42	1.88e-22	1.84e-21	2.36e-05	6.55e-95	1.57e-21	6e-106	5.85e-08	7.34e-23	4.37e-10	3.57e-31	4.03e-24	3.91e-44	1.22e-101	0.00194749	2.61e-10	1.03e-76	1.37e-84	1.16e-28	3.93e-77	1.82e-115	1.52e-17	9.28e-09	6.28e-33	1.27e-06	4.62e-46	1.47e-19	3.62e-21	4.23e-15
F_13pcw_CB	1.03e-120	7.97e-24	1.64e-40	3.1e-21	3.22e-21	9.69e-05	3.82e-86	1.86e-21	3e-108	2.25e-08	1.91e-24	6.3e-10	1.56e-32	3.11e-24	1.22e-48	1.57e-106	0.000184053	2.05e-09	2.12e-74	1.42e-84	1.46e-27	3.36e-75	1.8e-113	1.2e-16	6.9e-09	4.06e-30	5.05e-07	4.53e-54	2.57e-24	2.12e-21	3.79e-15
F_13pcw_DFC	4.72e-126	9.69e-25	1.34e-41	1.43e-22	5.97e-21	2.58e-05	7.75e-94	1.19e-20	1.88e-105	3.27e-07	1.79e-23	8.78e-11	1.56e-30	6.24e-24	8.15e-44	2.02e-102	0.000475285	3.61e-10	7.42e-76	4.98e-84	5.3e-27	4.97e-77	6.24e-116	4.83e-16	4.65e-08	9.42e-32	5.92e-06	6.49e-45	2.31e-19	1.34e-21	6.63e-15
F_13pcw_OFC	3.01e-113	2.21e-22	1.66e-39	3.27e-21	3.27e-20	2.76e-05	1.43e-88	8.18e-19	2.65e-94	1.24e-06	3.57e-21	7.8e-10	2.51e-28	3.03e-23	2.29e-41	4.47e-95	0.000331732	5.09e-10	3.27e-68	3.73e-75	1.1e-25	6.14e-70	1.18e-103	6.99e-16	7.74e-07	6.34e-30	1.48e-05	5.11e-43	7.1e-17	5.88e-19	3.88e-13
F_13pcw_STC	7.73e-123	7.05e-24	1.19e-39	1.31e-21	5.9e-20	5.97e-05	4.64e-89	3.92e-22	9.55e-102	6.61e-08	4.42e-23	3.03e-11	1.15e-28	2.36e-22	8.25e-42	6.65e-98	0.000921107	8.12e-10	2.51e-73	9.09e-82	1.33e-28	9.36e-74	2.6e-113	2.57e-17	1.89e-08	1.85e-30	1.19e-06	8.44e-43	7.57e-20	4.11e-21	2.05e-14
F_13pcw_A1C	1.25e-127	9.5e-24	2.95e-42	4.11e-22	4.27e-22	5.01e-05	4.35e-95	7.2e-22	2.45e-103	3.16e-08	4.28e-23	1.57e-11	8.88e-32	9.53e-23	1.51e-46	2.46e-103	0.000513526	2.53e-10	2.91e-80	1.57e-87	7.61e-31	2.14e-79	3.71e-119	4.14e-20	8.55e-09	9.01e-35	6.27e-07	1.72e-49	4.25e-23	8.79e-22	5.46e-15
F_13pcw_HIP	1e-122	3.63e-25	3.71e-40	3.14e-21	7.34e-21	0.000108044	3.73e-91	3.12e-21	3.23e-108	2.16e-07	1.84e-24	2.1e-11	2.09e-31	5.02e-25	6.28e-46	9.39e-105	0.00101888	9.88e-10	8.39e-77	8.77e-86	1.56e-29	1.54e-78	1.13e-117	1.19e-18	5.45e-08	2.94e-32	2.03e-06	3.7e-50	1.2e-23	4.38e-22	3.6e-15
F_13pcw_M1C	7.58e-126	4.19e-24	1.54e-42	9e-23	1.07e-21	1.72e-05	3e-96	9.96e-22	2.01e-101	1.52e-07	2.82e-23	3.17e-10	1.99e-31	1.01e-22	4.64e-43	1.19e-100	0.00138823	6.04e-11	1.08e-75	6.06e-83	6.67e-28	2.04e-76	2.5e-114	4.85e-17	1.07e-08	5.98e-32	2e-06	4.68e-43	3.99e-19	4.37e-21	7.08e-15
F_13pcw_ITC	1.35e-124	3.37e-23	2.16e-40	2.73e-21	4.86e-21	4.69e-05	4.34e-91	2.57e-22	2.51e-101	7.1e-08	3.98e-23	3.44e-11	6.79e-31	1.5e-22	7.69e-44	1.3e-102	0.000957146	5.96e-10	5.67e-77	3.49e-85	4.81e-29	6.89e-75	4.06e-114	7.11e-18	1.43e-07	1.23e-31	2.57e-06	4.73e-45	5.52e-20	9.45e-21	1.01e-13
F_13pcw_MD	3.03e-123	3.35e-23	3.55e-40	6.42e-21	3.31e-21	5.41e-05	9.36e-87	2.9e-20	1.4e-104	1.89e-08	2.29e-23	6.6e-11	2.78e-31	4.42e-21	2.17e-46	1.82e-105	0.000156111	2.09e-08	5.58e-73	2.75e-81	1.27e-28	7.97e-75	7.97e-115	1.72e-17	2.51e-09	6.85e-33	1.61e-06	1.69e-49	1.03e-22	1.79e-22	3.97e-16
F_13pcw_MFC	6.8e-126	1.33e-25	2.93e-42	1.44e-22	1.26e-21	2.23e-05	6.44e-96	5.12e-22	2.92e-108	2.92e-07	1.31e-24	2.02e-10	3.08e-32	1.43e-25	1.38e-46	5.77e-104	0.000738047	1.95e-10	4.41e-78	9.75e-86	2.71e-27	4.56e-76	4.81e-117	2.01e-16	2.02e-08	1.08e-32	2.39e-06	1.23e-48	1.85e-21	7.56e-22	4.43e-15
F_13pcw_VFC	8.34e-129	1.33e-24	4.86e-42	1.94e-22	1.56e-21	9.25e-06	2.1e-96	1.29e-21	1.41e-102	2.55e-07	2.57e-23	8.36e-10	1.84e-32	5.58e-23	1.58e-43	1.04e-98	0.0035038	6.29e-11	4.35e-75	3.9e-84	2.37e-28	7.98e-76	1.29e-116	1.26e-17	5.86e-09	8.63e-32	6.73e-07	1.94e-48	5.31e-20	4.69e-21	4.74e-15
M_13pcw_S1C.1	3.14e-122	2.4e-23	1.45e-40	3.32e-22	2.82e-20	3.43e-05	2.12e-91	4.55e-21	1.17e-101	2.2e-07	4.96e-21	3.48e-10	6.22e-30	1.85e-22	1.25e-44	1.74e-100	0.00254218	5.54e-10	6.72e-73	4.36e-80	1.98e-27	1.19e-72	6.69e-110	6.93e-16	2.66e-08	1.27e-29	1.42e-06	4.77e-41	2.6e-17	8.82e-20	6.8e-14
M_13pcw_DFC.1	8.36e-120	1.14e-22	1.6e-38	5.76e-21	1.83e-19	2.67e-05	1.99e-86	6.85e-21	5.7e-99	6.83e-07	2.07e-20	1.09e-10	3.12e-30	1.35e-22	4.14e-45	5.4e-96	0.00189179	9.68e-10	2.31e-69	2.72e-77	3.81e-27	4.69e-72	1.27e-109	2.44e-15	1.89e-08	1.45e-28	8.5e-07	1.14e-43	4.03e-18	1.53e-20	3.39e-14
M_13pcw_CB	6.34e-121	1.13e-23	2.28e-42	4.36e-22	3.08e-22	6.93e-05	4.81e-90	3.79e-21	9.53e-111	3.6e-08	7.69e-23	9.23e-11	9.12e-31	2.46e-24	4.9e-50	1.16e-105	0.000317149	1.24e-09	2.49e-74	9.09e-85	6.72e-28	2.33e-74	3.53e-113	4.2e-17	1.09e-08	3.03e-30	4.65e-07	8.67e-51	4.45e-25	6.98e-22	2.69e-15
M_13pcw_AMY.1	6.01e-118	1.95e-22	2.27e-38	5.56e-20	2.48e-20	0.000767373	1.2e-86	1.15e-21	6.04e-110	9.08e-07	1.08e-20	1.23e-12	4.43e-30	4.33e-25	1.61e-50	8.41e-106	0.00156539	9.43e-10	3.46e-76	1.51e-82	1.77e-29	5.91e-78	6.44e-115	1.08e-17	1.63e-07	1.67e-29	1.57e-06	2.41e-42	1.46e-20	5.35e-20	2.45e-14
M_13pcw_ITC.1	3.23e-120	3.37e-22	1.25e-39	2.28e-21	3.56e-20	6.38e-05	1.52e-88	3.26e-20	9.48e-105	1e-06	3.26e-21	4.16e-11	8.96e-29	1.08e-24	4.78e-48	2.69e-100	0.00271613	6.48e-10	5.64e-74	2.2e-79	2.06e-28	9.53e-72	2.1e-110	7.92e-17	1.7e-07	4.25e-30	3.15e-06	2.52e-43	4.81e-19	2.06e-20	4.3e-14
M_13pcw_HIP.1	3.44e-116	3.66e-23	2.8e-38	1.92e-20	9.4e-20	0.000333695	2.8e-87	7.37e-21	2.73e-107	8.73e-07	1.42e-21	1.66e-11	1.15e-30	5.06e-25	1.78e-47	6.4e-100	0.000322193	1.62e-09	7.67e-72	2.03e-79	3.15e-28	1.52e-73	4.24e-113	9.86e-17	1.8e-07	2.85e-30	2.24e-06	4.24e-51	7.37e-24	5.08e-20	3.88e-14
M_13pcw_IPC.1	1.65e-120	3.78e-24	1.23e-41	8.8e-23	8.91e-21	5.09e-05	1.92e-92	4.09e-21	1.95e-99	1.18e-07	8.73e-22	5.38e-10	5.09e-29	1.01e-22	5.5e-42	5.05e-94	0.00553893	2.18e-10	6.6e-75	2.08e-81	2.99e-27	1.29e-73	1.32e-110	3.43e-16	5.04e-08	7.79e-30	6.35e-07	8.73e-42	1.57e-18	7.76e-20	7.95e-14
M_13pcw_A1C.1	1.83e-121	9.33e-24	1.76e-38	8.71e-21	1.32e-19	6.18e-05	9.38e-87	7.81e-22	4.42e-99	1.14e-07	4.75e-22	1.72e-10	6.63e-28	3.31e-22	4.5e-45	9.45e-97	0.00085834	1.03e-09	6.26e-72	9.72e-78	1.96e-29	1.68e-72	4.02e-109	6.45e-18	5.89e-08	1.84e-30	1.49e-06	7.45e-42	1.53e-18	2.51e-20	9.29e-14
M_13pcw_VFC.1	1.24e-118	4.02e-23	4.4e-37	1.74e-20	1.7e-18	3.17e-05	8.63e-84	2.95e-22	3.71e-98	5.49e-07	4.75e-20	3.11e-10	1.99e-28	7.89e-21	1.93e-45	2.47e-97	0.00278393	9.18e-10	1.9e-68	5e-76	6.16e-28	1.1e-70	4.76e-108	2.56e-16	2.94e-08	2.04e-28	2.97e-06	1.33e-38	2.05e-17	4.07e-20	1.28e-13
M_13pcw_STR.1	1.45e-114	2.23e-21	1.16e-36	7.97e-19	8.65e-20	0.000129293	6.04e-82	7.2e-18	1.57e-101	9.34e-08	7.17e-21	1.39e-12	1.26e-29	6.41e-23	4.46e-48	1.03e-100	0.000307943	2.98e-09	3.4e-71	1.07e-79	1.05e-28	1.64e-71	2.95e-110	1.61e-17	4.81e-08	1.01e-29	2.93e-06	9.22e-45	3.95e-21	3.05e-19	1.61e-13
M_13pcw_OFC.1	4.96e-113	4.8e-21	6.58e-34	6.68e-19	6.86e-17	0.000134311	4.58e-76	5.24e-21	1.75e-99	8.59e-07	7.29e-20	2.57e-11	5.57e-29	1.83e-22	8.99e-46	2.04e-99	0.000554733	6.46e-09	5.02e-67	7.9e-76	7.34e-27	2.54e-68	1.02e-104	3.8e-15	8.47e-08	3.56e-28	1.34e-05	2e-41	2.26e-17	1.74e-20	5.77e-14
M_13pcw_MFC.1	1.94e-112	3.17e-21	1.91e-34	3.65e-19	3.63e-17	6.68e-05	7.16e-77	4.19e-20	2.46e-101	3.83e-06	7.3e-20	8.28e-11	3.2e-28	1.36e-23	1.44e-47	1.16e-99	0.000245926	3.05e-09	1.85e-67	4.15e-77	2.72e-26	2.94e-69	1.74e-105	6.26e-15	1.63e-07	4.51e-28	6.52e-06	9.19e-43	7.46e-17	1.1e-19	8.27e-14
M_13pcw_V1C.1	1.96e-118	4.65e-23	2.58e-40	3.74e-22	4.46e-20	0.000118405	1.73e-91	1.75e-22	1.89e-106	8.82e-07	4.25e-22	3.44e-10	2.93e-31	3.11e-25	2.01e-46	9.27e-99	0.00207304	1.4e-09	7.17e-75	8.64e-82	1.66e-26	2.92e-76	4.07e-112	2.31e-15	8.34e-08	8.25e-30	3.18e-06	9.71e-47	8.77e-22	9.61e-20	1.08e-13
M_13pcw_M1C.1	3.89e-122	1.11e-23	3.89e-41	3.16e-22	7.85e-21	3.12e-05	2.73e-92	1.07e-20	3.36e-102	2.86e-07	7.43e-22	1.47e-10	3.04e-31	1.3e-24	1.1e-43	1.73e-98	0.00252661	4.93e-10	4.28e-76	8.08e-84	2.17e-27	4.44e-75	1.92e-111	4.54e-16	2.06e-08	2.3e-30	3.66e-06	1.23e-43	3.16e-19	5.12e-21	2.54e-14
M_16pcw_VFC	8.11e-123	8.55e-24	4.49e-40	1.37e-21	2.11e-20	7.93e-05	5.41e-88	2.56e-21	9.7e-101	1.06e-07	2.5e-23	1.6e-11	1.08e-31	1.16e-24	9.7e-44	9.15e-99	0.00128409	3.53e-09	9.28e-80	3.6e-86	4.09e-28	1.09e-74	1.51e-116	3.5e-17	8.66e-09	3.7e-33	2.16e-06	7.85e-46	1.76e-22	4.98e-20	6.39e-14
M_16pcw_OFC	2.18e-122	5.21e-25	8.61e-40	1.63e-21	3.41e-20	4.22e-05	3.72e-87	8.38e-21	7.08e-98	6.84e-08	5.26e-24	5.25e-11	9.02e-32	1.8e-22	4.52e-40	7.23e-96	0.00265424	3.3e-09	2.4e-76	3.49e-84	2.84e-28	6.53e-75	1.1e-115	4.06e-17	1.19e-08	8.1e-32	1.52e-06	2.66e-47	4.55e-20	1.43e-19	4.07e-13
M_16pcw_STC	1.17e-117	7e-23	1.91e-38	7.59e-21	1.65e-19	0.000253662	5.2e-85	4.75e-22	2.02e-99	2.72e-07	5.02e-23	6.85e-12	2.4e-30	2.35e-22	2.92e-42	1.64e-97	0.0018254	6.83e-09	3.61e-78	2.28e-82	4.51e-28	2.95e-73	8.53e-113	5.21e-17	1.78e-07	8.91e-32	2.6e-06	1.01e-46	4.54e-22	1.38e-20	2.73e-14
M_16pcw_DFC	9.52e-117	3.45e-23	7.04e-37	2.81e-20	1.68e-18	3.7e-05	4.3e-82	5.88e-21	1.01e-99	6.65e-07	9.97e-23	2.78e-11	6.34e-32	4.42e-23	8.59e-43	8.09e-98	0.000995827	9.73e-09	2.74e-74	7.1e-81	8.4e-27	6.37e-72	2.34e-110	8.48e-16	9.68e-08	3.21e-29	3.64e-05	1.43e-45	5.43e-20	5.14e-19	3.6e-13
M_16pcw_IPC	1.63e-121	5.23e-23	3.4e-41	5.76e-22	3.71e-21	7.62e-05	1.79e-90	2.44e-20	4.11e-100	1.32e-07	1.89e-22	1.58e-11	8.96e-32	2.15e-24	1.38e-43	5.86e-99	0.00126357	2.29e-10	4.09e-77	3.88e-82	2.88e-28	2.1e-74	2.43e-115	5.47e-17	3.84e-08	4.42e-32	2.3e-06	5.2e-44	2.52e-19	9.52e-19	1.23e-12
M_16pcw_A1C	2.79e-123	9.14e-25	1.68e-41	3.57e-22	2.95e-21	7.22e-05	5.46e-91	5.47e-20	3.18e-98	7.07e-08	3.69e-24	2.44e-10	4.16e-31	8.18e-23	1.05e-39	2.81e-96	0.00237532	9.28e-10	5e-77	4.47e-84	4.81e-28	2.22e-76	1.47e-114	2.54e-17	3.86e-08	3.95e-32	6.93e-07	6.34e-43	1.62e-20	7.87e-20	1.5e-13
M_16pcw_MFC	2.01e-114	1.43e-23	5.3e-35	1.49e-19	2.44e-17	0.000139219	5.33e-78	7.27e-20	4.81e-98	8.98e-07	2.21e-22	2.69e-11	9.37e-31	2.15e-23	3.94e-40	2.1e-92	0.0021543	1.78e-08	2.62e-72	9e-80	9.23e-25	3.45e-71	4.59e-109	9.17e-14	6.45e-07	5.78e-28	0.000123912	4.51e-47	7.61e-22	1.3e-18	2.54e-13
M_16pcw_STR	1.45e-120	3.11e-24	1.7e-42	3.22e-21	2.6e-23	0.000163215	1.43e-92	9.19e-19	2.12e-99	2.54e-08	2.39e-23	3.39e-12	2.88e-31	4.79e-23	2.68e-45	2.15e-104	0.00178277	3.27e-09	5.77e-80	2.54e-85	3.85e-29	1.68e-80	7.67e-120	4.66e-18	1.52e-07	5.85e-33	9.85e-07	8.04e-44	3.23e-21	4.01e-20	7.53e-14
M_16pcw_MD	9.87e-120	1.23e-21	7.87e-40	9.66e-21	4.9e-21	4.35e-05	2.7e-85	5.91e-22	4.47e-101	5.19e-08	7.92e-22	1.53e-12	5.43e-29	2.88e-22	3.73e-47	1.91e-103	3.82e-05	1.12e-08	8.14e-71	2.81e-80	1.03e-28	2.35e-74	2.37e-114	9.12e-17	2.42e-09	9.38e-34	3.01e-07	7.89e-53	1.87e-25	2.83e-23	2.16e-16
M_16pcw_V1C	6.54e-120	5.77e-23	1.07e-39	9.96e-22	7.03e-20	7.67e-05	4.48e-87	1.23e-21	3.95e-103	1.53e-07	1.17e-23	6.49e-11	1.45e-31	1.58e-24	1.37e-41	2.33e-97	0.00281538	4.66e-09	7.88e-77	1.36e-83	1.36e-27	1.28e-74	1.19e-113	2.86e-16	3.65e-08	4.63e-31	3.44e-06	3.91e-46	9.9e-21	2.63e-18	2.33e-12
M_16pcw_VFC.1	2.13e-129	4.61e-26	3.07e-44	4.72e-23	3.77e-23	6.07e-05	1.2e-99	3.37e-21	1.38e-100	1.37e-07	8.45e-25	1.05e-09	6.16e-31	6.17e-22	7.12e-41	9.93e-99	0.000783719	1.61e-10	1.13e-80	3.19e-85	8.85e-29	1.01e-75	1.1e-116	3.98e-18	3.67e-08	3.35e-34	3.02e-06	1.01e-46	8.48e-22	1.61e-20	2.81e-14
M_16pcw_STC.1	6.37e-125	7.73e-25	1.77e-42	3.99e-23	2.8e-21	6.99e-05	3.49e-94	6.91e-22	3.31e-105	6.62e-08	1.08e-24	1.97e-10	1.89e-32	2.67e-23	1.53e-42	3.3e-102	0.000948899	7.1e-10	2.75e-82	5.02e-87	3.64e-28	7.04e-77	1.69e-117	2.85e-17	7.11e-09	5.77e-33	7.6e-07	6.46e-54	1.69e-24	1.44e-20	1.56e-14
M_16pcw_IPC.1	5.27e-128	2.23e-25	3.79e-44	1.45e-23	1.6e-22	2.1e-05	1.87e-98	5.08e-23	1.92e-101	4.02e-08	4.02e-24	6.65e-10	1.27e-30	4.6e-23	8.14e-45	4.96e-98	0.00141297	1.48e-10	1.11e-78	1.42e-85	4.33e-29	3.96e-75	2.84e-115	7.93e-18	3.74e-08	3.3e-33	8.83e-07	1.11e-45	2.23e-21	1.5e-20	2.36e-14
M_16pcw_A1C.1	1.15e-125	9.22e-25	2.4e-45	7.54e-24	1.87e-23	4.61e-05	8.23e-101	1.1e-21	8.21e-102	1.04e-07	2.7e-23	6.41e-10	4.51e-30	7.91e-23	2.82e-44	8.42e-100	0.000640314	7.05e-11	3.08e-79	4.24e-83	1.14e-29	1.94e-75	2.05e-114	2.7e-18	8.58e-08	5.77e-34	4.07e-07	1.75e-44	2.57e-19	5.09e-21	8.21e-15
M_16pcw_MD.1	2.34e-124	2.48e-24	3.91e-42	1.01e-21	2.21e-22	6.19e-05	2.22e-91	3.61e-20	2.43e-102	4.26e-09	5.41e-24	1.84e-10	4.83e-32	2.22e-23	1.52e-46	1.33e-105	0.000124916	2.56e-09	9.68e-76	1.07e-83	9.22e-30	1.54e-78	1.23e-118	3.34e-18	1.14e-09	2.21e-35	5.48e-07	2.48e-49	3.74e-25	2.07e-23	1.02e-16
M_16pcw_AMY	5.19e-119	2.29e-23	3.31e-37	5.04e-20	4.33e-19	0.000261198	1.08e-83	5.96e-22	3.09e-106	2.49e-07	1.08e-23	1.03e-12	1.7e-32	8.67e-25	1.51e-47	8.29e-105	0.00199819	8.94e-09	4.07e-79	3.55e-86	4.69e-28	1.62e-74	1.53e-115	1.39e-16	1.74e-07	1.28e-31	2.06e-05	9.43e-54	4.8e-25	1.03e-19	3.51e-14
M_16pcw_V1C.1	1.2e-120	3.8e-24	3.48e-43	3.14e-23	6.92e-22	0.000100421	2.68e-95	5.39e-21	1.37e-105	2.83e-07	1.45e-23	4.09e-09	3.06e-31	1.81e-25	1.6e-43	1.55e-97	0.00122281	9.24e-10	3.11e-77	2.94e-83	2.76e-27	3.26e-73	9.46e-114	1.8e-16	3.82e-07	5.39e-33	7.21e-06	5.75e-50	2.54e-22	4.52e-20	8.61e-14
M_16pcw_ITC	7.4e-126	3.91e-25	9.06e-44	7.21e-23	7.36e-23	0.000119899	2.92e-99	1.4e-21	2.01e-104	1.63e-07	6.76e-24	3.99e-11	1.94e-32	2.42e-24	9.78e-46	6.99e-102	0.000827558	7.6e-11	3.2e-80	4.1e-88	6.45e-30	1.34e-75	9.37e-117	4.23e-19	6.71e-08	1.14e-35	9.41e-07	1.68e-48	4.03e-23	5.95e-22	3e-15
M_16pcw_CBC	2.72e-113	4.91e-22	1.26e-35	7.92e-20	1.09e-17	0.000241077	3.11e-77	2.72e-21	6.39e-107	6.09e-08	1.45e-22	1.65e-10	1.05e-29	3.08e-23	3.32e-48	2.81e-106	2.9e-05	3.91e-08	4.69e-72	3.25e-83	8.84e-27	3.49e-69	2.39e-109	6.47e-16	2.72e-09	1.04e-29	9.71e-07	2.75e-59	8.52e-27	4.4e-22	1.64e-16
M_16pcw_HIP	3.35e-124	1.63e-24	1.03e-42	2.93e-22	2.06e-22	7.43e-05	9.1e-97	3.15e-22	1.9e-108	1.85e-07	2.14e-23	3.81e-11	2.95e-31	4.44e-24	6.05e-48	2.28e-106	0.000557606	7.88e-11	4.99e-79	1.13e-85	3.03e-30	3.95e-76	6.23e-118	4.47e-19	1.4e-09	6.77e-36	4.01e-08	9.58e-52	4.29e-24	7.22e-22	3.49e-15
M_16pcw_STR.1	1.64e-124	1.32e-24	4.46e-44	2.42e-22	9.63e-24	0.000162605	1.66e-97	3.16e-21	8.17e-107	2.02e-08	3.81e-24	1.09e-12	4.35e-32	8.04e-24	3.23e-49	2.98e-108	0.000411144	8.61e-10	6.37e-81	8.22e-88	5.57e-30	1.79e-79	7.71e-122	4.77e-19	1.97e-08	1.93e-35	4.87e-07	2.83e-49	2.01e-24	1.27e-21	3.79e-15
M_16pcw_OFC.1	6.56e-127	1.08e-24	6.09e-44	8.16e-23	4.28e-23	5.01e-05	5.38e-101	2.85e-22	5.86e-105	3.93e-07	5.74e-24	1.1e-09	2.56e-30	5.68e-23	6.88e-46	4.07e-103	0.000641082	1.29e-10	3.21e-80	3.95e-85	4.07e-29	3.18e-76	3.34e-118	2.28e-18	1.66e-08	8.2e-35	8.97e-07	1.36e-46	9.18e-21	2.01e-20	1.86e-14
M_16pcw_DFC.1	3.09e-129	1.12e-25	3.42e-44	1.62e-23	1.28e-22	4.47e-05	1.2e-100	1.42e-21	4.65e-108	4.3e-07	3.31e-23	3.51e-10	5.82e-33	1.3e-25	6.58e-46	4.76e-103	0.000622743	1.49e-10	3.03e-81	4.09e-88	7.16e-29	3.52e-78	4.54e-119	5.5e-18	1.83e-08	4.9e-34	5e-06	4.39e-48	2.69e-22	6.4e-21	6.18e-15
M_16pcw_M1C	1.26e-127	9.72e-25	6.03e-45	1.83e-23	1.91e-23	4.1e-05	1.31e-101	3.91e-22	3.05e-99	1.31e-07	5.66e-23	5.15e-10	6.35e-29	6.32e-23	1.23e-44	1.77e-101	0.0011052	6.1e-11	2.81e-76	1.27e-83	1.66e-29	5.61e-74	3.41e-116	5.63e-18	2.55e-08	5.99e-34	1.79e-06	3.79e-40	2.08e-18	3.41e-21	1.22e-14
M_16pcw_MFC.1	3.51e-126	5.63e-26	5.11e-43	1.02e-22	3.02e-22	9.39e-05	3.11e-98	8.25e-21	6.89e-106	6.35e-07	4.53e-24	1e-09	4.46e-31	8.81e-25	2.17e-45	6.88e-98	0.00139683	4.64e-10	5.18e-78	5.52e-85	7.01e-28	1.69e-73	9.01e-115	4.18e-17	1.46e-07	6.97e-34	7.04e-06	1.15e-47	7.99e-21	3.01e-20	5.26e-14
M_16pcw_S1C	2.83e-126	9.79e-25	5.19e-45	1.5e-23	2.01e-23	4.63e-05	6.88e-100	7.34e-22	2.1e-102	4.27e-08	9.18e-23	3.14e-10	8.8e-31	2.58e-21	1.29e-43	1.63e-99	0.00209613	1.35e-10	4.25e-79	1.72e-85	9.7e-30	2e-74	8.86e-117	1.09e-18	1.34e-08	4.19e-34	4.39e-07	3.22e-46	6.16e-21	2.58e-20	3.2e-14
M_16pcw_HIP.1	2.13e-116	7.15e-22	3.67e-39	5.9e-21	4e-20	0.000256006	6.15e-86	7.01e-22	7.11e-103	1.47e-06	1.28e-20	1.51e-12	1.36e-30	4.91e-25	7.53e-47	6.81e-102	0.000399758	4.91e-10	2.98e-74	6.05e-80	2.74e-26	1.84e-71	2.1e-108	9.5e-15	5.25e-07	1.63e-27	3.13e-05	2.19e-49	1.6e-22	3.43e-21	4.29e-15
M_16pcw_ITC.1	4.74e-122	7.9e-23	1.98e-40	2.03e-21	6.09e-21	8.73e-05	1.16e-90	1.1e-21	7.48e-100	9.28e-08	2.25e-22	3.9e-12	2.76e-30	1.41e-21	1.01e-43	2.5e-101	0.00086584	4.56e-10	4.33e-78	7.36e-85	1.15e-29	1.5e-76	1.3e-115	3.47e-18	2.16e-08	9.55e-33	7.2e-07	3.6e-44	1.1e-20	2.39e-21	4.45e-15
M_16pcw_DFC.2	1.5e-119	6.94e-22	4.73e-38	1.55e-20	2e-19	9.32e-05	2.01e-85	1.72e-20	3.58e-98	4.83e-07	1.53e-20	1.05e-10	9.5e-29	1.74e-21	1.36e-45	4.52e-98	0.000244592	1.38e-09	5.73e-72	9.42e-81	4.94e-29	4.23e-70	2.6e-107	1.41e-17	1.32e-08	6.85e-31	8.04e-07	4.94e-42	5.26e-18	6.67e-21	3.1e-14
M_16pcw_IPC.2	3.89e-125	3.28e-23	2.55e-43	8.67e-23	1.76e-22	1.21e-05	1.19e-95	3.72e-22	4.04e-101	6.41e-08	5.57e-23	1.18e-10	4.35e-32	3.11e-24	1.32e-42	9.18e-99	0.00224364	2.63e-10	3.27e-78	8.9e-87	3.91e-29	9.58e-76	4.61e-116	4.75e-18	1.18e-08	6.09e-34	4.54e-07	1.64e-50	1.34e-21	5.66e-21	2.65e-14
M_16pcw_STC.2	1.22e-124	2.28e-24	1.58e-42	3.06e-22	3.05e-22	9.9e-05	2.75e-94	1.59e-22	1.41e-100	1.13e-07	2.54e-23	2.24e-11	4.11e-31	1.85e-23	1.2e-43	4.72e-98	0.00151074	2.6e-10	1.18e-80	4.07e-87	1.41e-29	2.79e-75	2.89e-115	3.59e-18	1.78e-09	3.03e-33	2.33e-07	1.36e-48	1.43e-21	1.57e-21	6.06e-15
M_16pcw_V1C.2	1.12e-118	6.16e-22	7.13e-39	5.47e-21	8.5e-20	9.53e-05	3.19e-85	6.27e-22	1.82e-99	1.15e-07	1.02e-21	7.27e-11	1.08e-30	1.89e-22	6.09e-45	1.69e-99	0.000337557	1.45e-09	6.51e-74	2.74e-82	2.55e-28	8.17e-71	5.36e-109	6.46e-17	1.03e-08	1.5e-31	5.67e-07	2.03e-48	1.54e-21	1.62e-21	5.75e-15
M_16pcw_MD.2	7e-115	5.82e-21	3.53e-34	4.36e-18	5.37e-18	9.94e-05	2.58e-74	9.51e-21	1.09e-96	8.85e-09	3.37e-20	6.49e-12	5.14e-29	2.05e-20	1.2e-47	3.38e-103	7.34e-05	9.07e-08	5.27e-70	2.9e-77	1.14e-29	7.47e-77	3.59e-111	1.74e-17	1.59e-08	5.23e-32	9.77e-07	5.38e-46	5.41e-21	2.44e-22	3.67e-16
M_16pcw_STR.2	1.15e-119	3.67e-22	2.08e-42	1.51e-21	7.39e-23	0.000146555	6.02e-92	3.56e-21	1.98e-101	2.6e-08	1.49e-20	9.54e-13	1.73e-30	4.41e-22	2.22e-49	7.24e-107	0.0002843	3.62e-09	8.59e-77	2.08e-84	1.06e-30	3.02e-77	7.81e-116	2.5e-19	4.24e-08	4.08e-33	4.14e-07	1.77e-45	1.52e-20	1.69e-21	4.51e-15
M_16pcw_M1C.S1C	2.87e-128	4.12e-24	3.15e-42	1.52e-22	1.29e-21	4.72e-05	2.53e-94	4.48e-22	1.91e-101	1.49e-07	5.24e-22	3.75e-11	2.46e-30	1.19e-23	7.28e-46	6.19e-102	0.000242252	4.01e-10	1.75e-76	4.12e-85	1.15e-29	1.18e-74	1.81e-114	2.61e-18	3.35e-09	1.27e-32	1.15e-06	4.03e-47	9.05e-22	3.49e-21	7.74e-15
M_16pcw_A1C.2	1.6e-123	5.36e-23	2.68e-42	2.15e-22	7.62e-22	8.85e-05	1.3e-93	9.72e-21	2.08e-100	9.2e-08	1.56e-22	3.76e-11	1.74e-30	7.74e-23	2.8e-43	3.19e-101	0.00161262	1.48e-10	2.58e-76	3.98e-85	7.66e-30	9.17e-74	5.11e-114	2.15e-18	3.9e-09	1.61e-32	2.2e-07	1.21e-46	1.24e-20	5.7e-21	2.32e-14
M_16pcw_VFC.2	1.24e-128	1.51e-23	1.37e-42	2e-22	4.13e-22	1.02e-05	1.01e-95	8.33e-22	4.56e-103	2.27e-07	3.02e-22	3.89e-11	1.34e-30	7.19e-23	3.63e-45	4.38e-102	0.000477863	1.89e-10	1.53e-80	1.02e-86	1.42e-29	6.28e-74	1.05e-114	1.75e-18	4.36e-10	2.46e-33	2.78e-07	5.56e-50	1.34e-23	8.53e-22	6.91e-15
M_16pcw_AMY.1	1.73e-121	3.25e-22	1.48e-42	2.48e-22	3.58e-22	6.65e-05	9.88e-95	4.33e-22	2.1e-104	1.11e-07	4.27e-21	1.5e-13	2.52e-29	3.67e-23	9.13e-51	2.31e-107	0.000497274	3.9e-10	2.13e-80	8.5e-86	9.78e-31	1.42e-77	5.9e-117	3.62e-19	3.48e-08	1.86e-33	2.99e-07	1.04e-46	3.19e-21	3.47e-22	3.18e-15
M_16pcw_MFC.2	1.61e-118	1.29e-21	2.29e-37	3.3e-20	4.61e-19	8.86e-05	3.62e-80	5.33e-21	3.82e-105	7.66e-08	2.29e-21	2.81e-11	3.14e-30	7.15e-23	3.67e-48	4.07e-102	0.000161257	3.65e-08	8.1e-73	2.41e-80	4.28e-28	2.14e-69	1.72e-109	1.23e-16	4.43e-09	6.4e-32	6.17e-07	2.05e-51	5.06e-23	3.05e-22	1.69e-15
F_17pcw_STR	2.72e-115	3.99e-23	7.45e-36	2.28e-19	2.2e-18	0.000279689	7.39e-79	8.09e-20	4.22e-96	5.45e-08	3.23e-24	8.79e-13	2.96e-30	1.25e-21	6.74e-43	3.22e-104	0.000455127	8.57e-08	3.64e-79	4.54e-85	5.03e-28	5.38e-77	7.79e-115	2.14e-17	6.5e-08	3.35e-32	1.38e-06	1.1e-53	6.12e-25	4.94e-20	4.82e-15
F_17pcw_STC	1.88e-118	1.82e-24	5.03e-40	2.11e-21	1.52e-20	0.000141973	7.87e-89	1.22e-21	5.08e-94	3.04e-07	3.1e-24	1.07e-10	1.29e-30	5.69e-22	1.09e-38	7.21e-95	0.00420503	1.49e-09	5.92e-78	1.79e-83	2.87e-27	6.04e-74	3e-113	2.17e-16	6.54e-07	8.54e-31	5.96e-06	3.87e-43	4.91e-21	1.78e-18	1.05e-12
F_17pcw_MD	1.26e-118	1.61e-22	2.18e-36	1.94e-19	7.39e-19	0.000238557	6.85e-79	5.64e-21	2.59e-101	1.56e-08	1.54e-22	5.4e-12	2.19e-30	1.87e-22	4.52e-48	2.15e-108	0.000109389	3.42e-08	2.52e-73	6.15e-79	3.64e-28	1.29e-74	2.3e-112	1.06e-16	3.09e-09	9.73e-32	5.93e-07	7.94e-53	6.93e-24	3.96e-22	5.02e-16
F_17pcw_A1C	5.53e-124	7.89e-24	8.88e-42	3.63e-22	1.51e-21	7.76e-05	1.1e-93	1.26e-20	3.66e-95	1.14e-07	4.42e-24	1.52e-11	3.87e-31	1.93e-22	7.98e-41	6.68e-100	0.000663878	2.84e-10	5.64e-78	5.89e-86	9.83e-30	2.52e-79	2.15e-118	2.59e-18	7.72e-09	2.63e-32	2.88e-07	3.25e-42	2.36e-20	6.89e-20	6.29e-14
F_17pcw_HIP	1.43e-118	1.09e-24	3.2e-36	9.34e-20	2.32e-18	0.000145173	6.24e-81	5.12e-21	1.16e-100	2.53e-07	4.89e-24	1.07e-11	1.37e-32	8.37e-24	3.15e-42	3.61e-102	0.000660405	4.94e-09	9.6e-79	2.6e-87	2.72e-27	4.02e-75	1.07e-116	4.19e-17	1.41e-08	2.19e-33	7.54e-07	1.06e-56	3.11e-27	2.21e-20	8.68e-15
F_17pcw_DFC	6.5e-124	3.77e-25	4.52e-40	1.31e-21	2.22e-20	2.68e-05	4.89e-91	2.58e-21	7.35e-97	2.66e-07	1.31e-24	4.84e-11	6.14e-31	8.36e-22	1.15e-39	2.94e-97	0.00149125	1.23e-09	2.64e-80	1.61e-87	7e-28	6.96e-78	1.77e-116	2.79e-17	6.58e-08	1.13e-32	1.11e-05	7.82e-46	5.91e-22	1.07e-18	5.36e-13
F_17pcw_VFC	4.65e-125	5.36e-26	1.32e-40	7.54e-22	1.11e-20	3.97e-05	1.11e-91	8.59e-21	6.72e-104	1.96e-07	6.99e-25	1.76e-11	3.55e-32	9.69e-24	4.25e-43	3.61e-102	0.000781224	1.67e-09	5.12e-82	2.48e-87	1.46e-28	1.92e-79	5.75e-119	9.44e-18	2.51e-08	2.93e-32	6.59e-06	1.72e-47	4.71e-23	4.81e-20	8.52e-14
F_17pcw_IPC	2.33e-121	9.29e-23	3.94e-43	1.35e-22	1.73e-22	5.52e-05	4.03e-95	4.42e-21	1.08e-93	5.44e-08	8.53e-22	4.3e-10	1.71e-29	1.96e-21	9.09e-42	1.35e-97	0.0012778	5.96e-10	3.53e-78	6.23e-84	8.64e-30	4.28e-75	1.57e-115	5.33e-18	3.37e-08	2.21e-32	4.14e-07	5.52e-39	1.56e-17	1.31e-19	5.06e-13
F_17pcw_M1C.S1C	2.12e-123	1.86e-24	1.43e-40	9.4e-22	9.64e-21	6.08e-05	6.7e-91	1.27e-22	2.19e-96	9.71e-08	2.8e-22	5.77e-11	1.67e-30	3.27e-23	2.99e-42	3.24e-97	0.000380578	9.75e-10	7.89e-79	4.96e-85	2.14e-29	1.3e-75	1.06e-116	4.07e-18	5.25e-09	4.77e-32	8.38e-07	2.74e-42	8.76e-20	1.79e-20	1.06e-13
F_17pcw_V1C	8.35e-121	1.27e-24	5.29e-41	5.6e-22	5.97e-21	4.28e-05	5.97e-91	1.37e-21	2.17e-100	9.51e-08	1.38e-23	6.25e-11	7.09e-32	1.85e-25	1.44e-41	1.51e-96	0.00154702	1.97e-09	7.11e-81	9.54e-87	1.33e-27	3.36e-75	3e-115	9.18e-17	9.42e-08	4e-32	1.83e-06	1.19e-45	6.89e-22	1.26e-18	1.65e-12
F_17pcw_CBC	1.03e-117	7.63e-23	1.78e-38	6.28e-21	1.87e-19	0.000105252	1.12e-83	1.79e-21	7.77e-101	2.76e-08	2.58e-22	3.96e-11	1.26e-29	8.98e-23	3.65e-48	9.69e-108	3.73e-05	7.4e-09	1.15e-74	3.47e-82	3.95e-27	4.81e-72	1.91e-111	7.48e-16	2.42e-08	2.55e-30	1.28e-06	4.11e-52	3.12e-24	3.21e-21	1.51e-15
F_17pcw_OFC	7.04e-124	3.85e-25	1.01e-40	1.07e-21	5.97e-21	4.37e-05	1.92e-92	1.58e-20	9.63e-100	3.8e-07	4.37e-23	3.28e-12	1.44e-30	2.6e-22	6.47e-45	1.89e-102	0.000311893	5.2e-10	2.5e-79	5.96e-84	6.07e-29	1.18e-78	3.4e-116	5.14e-18	9.12e-08	5.55e-32	3.64e-06	2.07e-42	4.03e-19	1.53e-20	8.68e-14
F_17pcw_AMY	1.61e-118	3.11e-23	1.07e-38	1.74e-20	3.9e-20	0.000238399	1.05e-86	5.57e-22	6.86e-102	8.24e-07	1.29e-22	4.3e-13	2.68e-31	3.14e-24	2.09e-45	2.84e-101	0.00116693	1.15e-09	1.09e-78	8.67e-84	1.87e-27	3.91e-75	1.11e-113	3.11e-16	2.55e-07	4.2e-30	6.89e-06	1.07e-45	6.31e-21	4.46e-20	2.8e-14
F_17pcw_MFC	6.87e-123	4.71e-25	9.53e-41	7.5e-22	8.07e-21	3.78e-05	1.01e-91	4.2e-22	1.32e-97	3.21e-07	4.55e-23	1.38e-11	1.24e-30	1.6e-22	2.35e-42	4.82e-100	0.000264972	6.85e-10	1.72e-78	1.73e-85	7.82e-29	4.51e-74	7.87e-117	1.16e-17	3.42e-08	1.71e-32	4.18e-06	2.76e-44	2.83e-20	3.5e-20	8.78e-14
F_19pcw_STC	2.36e-117	4.36e-23	3.49e-37	8.19e-20	2.77e-19	9.2e-05	4.56e-82	4.98e-20	4.18e-94	3.4e-07	9.06e-24	7.42e-12	2.65e-31	9.75e-22	1.12e-37	1.04e-93	0.00209784	4.03e-09	3.72e-79	9.4e-83	5.8e-27	7.9e-75	3.3e-111	3.75e-16	1.61e-07	3.64e-30	5.75e-06	1.57e-45	6.82e-23	1.32e-18	5.8e-13
F_19pcw_IPC	1.57e-117	5.07e-23	3.34e-36	1.5e-19	1.49e-18	0.000141679	1.54e-79	2.87e-19	2.95e-94	3.25e-07	2.68e-23	3.95e-11	1.15e-30	1.17e-22	1.13e-38	4.13e-91	0.00118936	5.85e-09	8.2e-78	2.46e-83	3.25e-27	1.18e-73	5.9e-111	3.79e-16	5.11e-08	1.38e-29	2.55e-06	1.72e-47	5.32e-22	9.94e-18	1.47e-12
F_19pcw_M1C.S1C	1.31e-118	5.23e-22	9.55e-36	1.7e-19	3.8e-18	7.6e-05	8.34e-79	2.72e-21	2.66e-95	1.94e-07	5.38e-23	2.77e-11	6.54e-31	1.13e-22	6.2e-39	2.78e-94	0.000724924	1.52e-08	6.69e-77	1.28e-83	1.35e-27	7.93e-75	4.12e-114	3.47e-16	1.15e-08	3.11e-30	1.5e-06	7.83e-47	3.29e-22	5.86e-18	6.46e-13
F_19pcw_MFC	2.41e-120	2.7e-25	5.25e-36	8.57e-20	4.16e-18	0.000153826	2.26e-80	3.54e-21	1.98e-98	4.73e-07	2.34e-24	9.36e-12	3.38e-31	1.19e-22	8.3e-41	2.14e-100	0.000688353	2.69e-08	1.26e-79	1.6e-85	1.17e-26	3.86e-76	1.13e-114	4.42e-16	2.1e-08	5.25e-31	4.81e-06	5.1e-52	6.6e-24	1.96e-19	6.61e-14
F_19pcw_V1C	5.05e-119	2.09e-23	5.81e-35	8.36e-19	4.7e-18	6.97e-05	1.18e-77	1.11e-20	2.75e-98	2.83e-07	2.04e-24	3.93e-11	1.6e-32	3.01e-24	1.29e-37	3.72e-92	0.00079064	5.48e-09	2.02e-79	8.61e-85	4.78e-27	5.47e-73	1.21e-113	7.84e-16	1.56e-08	3.08e-29	2.16e-06	1.57e-51	4e-25	1.18e-17	9.23e-13
F_19pcw_HIP	7.97e-110	9.23e-23	1.69e-34	6.11e-19	1.91e-17	0.000367375	9.96e-75	1.29e-19	7.21e-94	1.45e-06	6.52e-23	1.27e-11	1.39e-29	2.54e-22	2e-40	1.9e-99	0.000732476	1.97e-08	2.58e-73	1.56e-78	1.11e-25	5.96e-69	4.28e-107	1.74e-15	3.03e-07	3.85e-31	2.36e-06	1.01e-53	4.21e-26	7.14e-20	9.47e-15
F_19pcw_A1C	6.72e-117	1.78e-23	4.51e-37	9.12e-20	3.22e-19	5.01e-05	6.42e-82	2.36e-20	1.88e-92	2.79e-07	1.41e-23	3.73e-11	1.12e-30	6.44e-22	1.49e-37	7.3e-92	0.00465328	3.29e-09	5.37e-78	8.4e-82	2.48e-26	2.78e-71	4.75e-110	9.14e-16	1.85e-07	1.11e-29	4.37e-06	4.59e-46	1.67e-22	2e-18	4.52e-13
F_19pcw_MD	4.76e-115	2.43e-22	6.78e-35	1.97e-18	2.26e-18	6.29e-05	3.45e-75	1.35e-19	2.17e-96	8.38e-08	1.22e-22	5.72e-12	1.13e-29	3.02e-21	4.37e-42	6.21e-98	0.000120564	1.27e-07	1.98e-72	3.82e-79	1.77e-25	1.92e-69	3.08e-109	2.06e-14	1.29e-07	8.41e-31	1.64e-06	5.7e-54	1.61e-27	8.93e-21	1.73e-15
F_19pcw_VFC	4.44e-125	6.2e-25	1.26e-38	1.22e-20	6.66e-20	6.78e-05	4.25e-87	8.42e-22	2.54e-97	1.1e-07	1.41e-23	3.49e-11	9.48e-32	4.8e-23	6.14e-40	8.45e-98	0.000953921	1.53e-09	6.52e-82	1.16e-87	7.77e-29	4.9e-77	2.99e-117	3.92e-18	7.28e-08	1.89e-32	8.74e-06	2.97e-45	9.2e-21	1.84e-19	2.86e-13
F_19pcw_STR	1.64e-114	2.06e-23	4.11e-36	5.15e-19	5.12e-19	0.000343527	1.82e-78	3.5e-19	3.9e-101	1.48e-07	3.61e-23	2.24e-13	2.05e-31	1.62e-24	2.98e-45	2.09e-102	0.000579894	8.82e-08	2.2e-76	9.68e-83	1.38e-26	7.83e-76	3.88e-112	5.86e-16	7.75e-08	6.58e-30	1.18e-06	1.76e-53	2.83e-25	1.55e-19	2.84e-14
F_19pcw_DFC	3.83e-119	1.96e-24	1.19e-36	5.57e-20	1.44e-18	0.000105827	9.41e-83	5.4e-21	4.28e-93	5.93e-07	3.18e-24	7.48e-12	7.04e-31	1.49e-22	1.51e-38	2.61e-96	0.00209037	6.1e-09	2.64e-77	8.73e-82	4.78e-27	8.75e-72	2.23e-111	1.23e-16	3.06e-08	1.53e-29	4.73e-06	4.48e-45	4.36e-21	4.95e-18	1.31e-12
F_21pcw_CBC	1.93e-120	1.13e-23	1.79e-40	4.72e-21	2.26e-21	0.000112427	2.15e-88	1.75e-20	1.64e-98	3.32e-08	5.9e-22	1.16e-09	2.37e-29	1.15e-20	2.33e-46	1.06e-106	1.99e-05	1.34e-09	2.22e-75	1.03e-82	1.77e-27	4.48e-72	4.97e-112	1e-15	2.61e-07	2.07e-30	1.76e-06	1.12e-45	3.53e-21	1.09e-21	2.68e-15
F_21pcw_ITC	9.03e-124	1.1e-24	1.5e-42	1.32e-22	6.99e-22	6.67e-05	1.02e-94	1.77e-22	1.59e-97	8.24e-08	4.22e-25	1.55e-11	3.96e-32	1.75e-23	3.75e-41	1.31e-98	0.000237281	1.92e-10	5.09e-80	2.57e-87	6.18e-29	1.2e-76	1.47e-117	5.84e-18	1.99e-08	5.49e-35	9.09e-07	4.14e-47	2.1e-23	6.26e-21	3.97e-15
M_21pcw_MFC	5.44e-127	1e-23	9.47e-44	2.38e-23	2.44e-22	1.24e-05	8.15e-97	4.13e-22	2.91e-98	3.87e-08	1.14e-22	1.05e-11	4.17e-31	5.17e-22	3.15e-43	9.42e-104	0.000257964	7.94e-10	2.3e-83	2.7e-89	3.97e-31	1.54e-80	1.05e-121	1.07e-19	3e-10	4.08e-36	1.06e-07	6.64e-48	2.16e-22	2.32e-22	4.34e-15
M_21pcw_M1C	2.91e-126	4.44e-24	5.91e-43	7.97e-23	4.54e-22	6.52e-05	2.24e-96	6.5e-22	5.2e-100	1.8e-07	4.97e-22	2.86e-11	7.47e-31	6.86e-23	4.46e-46	2.57e-104	0.000408429	1.44e-10	5.99e-82	1.59e-86	2.55e-29	5.37e-78	3.69e-117	2.24e-18	7.02e-09	4.74e-34	1.19e-06	3.67e-45	3.75e-21	6.09e-21	3.15e-14
M_21pcw_STR	1.38e-119	9.21e-23	8.68e-41	1.12e-20	4.18e-22	9.52e-05	4.99e-90	1.7e-20	8.15e-98	1.17e-08	2.94e-22	3.27e-12	5.14e-31	1.76e-21	9.22e-44	7.21e-105	0.000114238	2.06e-09	2.94e-80	1.38e-85	3.18e-30	2.73e-80	8.15e-121	1.18e-19	7.21e-09	3.93e-34	3.61e-07	9.19e-52	1.68e-24	3.54e-21	4.7e-15
M_21pcw_HIP	3.14e-124	1.1e-24	5.82e-42	2.09e-22	1.74e-21	0.000149539	4.06e-93	2.01e-23	7.22e-102	1.74e-07	8.38e-23	4.84e-12	8.31e-31	9.13e-23	1.17e-47	5.89e-109	0.000157462	3.37e-10	1.29e-80	1.19e-85	9.86e-31	1.16e-80	1.29e-119	8.89e-20	1.08e-08	8.74e-37	2e-07	3.17e-52	5.2e-24	6.88e-23	4.33e-16
M_21pcw_STC	7.42e-128	4.54e-24	2.31e-43	4.76e-23	2.96e-22	4.03e-05	1.26e-95	4.81e-22	3.53e-98	6.94e-08	1.04e-23	2.39e-11	1.6e-31	7.47e-23	3.61e-44	1.12e-103	0.000317109	5.14e-10	2.27e-80	4.37e-87	9.66e-30	1.45e-79	7.79e-120	6.03e-19	7.54e-10	1.2e-35	9.49e-08	6.18e-47	4.4e-21	2.43e-21	1.02e-14
M_21pcw_ITC	5.74e-129	1.57e-24	5.41e-44	2.71e-23	1.21e-22	2.89e-05	4.94e-98	1.69e-22	2.43e-98	7.47e-08	1.6e-23	3.34e-11	1.08e-30	2.42e-22	1.03e-43	5.74e-104	6.05e-05	1.93e-10	1.07e-80	6.04e-88	2.97e-30	6.36e-77	2.19e-119	4.14e-19	7.23e-10	1.26e-35	3.11e-07	3.24e-45	4.15e-21	1.79e-21	8.49e-15
M_21pcw_AMY	2.16e-122	8.37e-24	1.87e-42	1.91e-22	6e-22	8.04e-05	3.35e-95	2.01e-22	1.27e-101	1.69e-07	1.42e-22	8.53e-12	5.56e-31	1.75e-22	8.63e-46	1.21e-106	0.00014618	4.21e-10	7.42e-80	4.98e-86	8.12e-31	8.66e-79	1.37e-118	1.04e-19	1.66e-08	8.26e-36	3.31e-07	4.88e-49	2.02e-22	1.03e-22	7.96e-16
M_21pcw_VFC	7.79e-123	1.93e-23	1.25e-42	1.7e-22	4.44e-22	9.08e-05	4.25e-95	1.37e-23	1.77e-104	1.47e-07	2.13e-22	1.02e-12	8.86e-31	5.79e-23	2.86e-48	2.5e-108	3.94e-05	1.31e-10	2.18e-81	2.08e-87	4.64e-30	6.35e-81	1.02e-118	4.66e-19	4.31e-09	3.74e-36	1.11e-07	1.3e-52	7.23e-24	6.09e-23	5.5e-16
M_21pcw_OFC	6.53e-126	6.1e-24	2.56e-42	8.1e-23	1.99e-21	2.01e-05	9.33e-95	4.52e-22	2.18e-96	5.44e-08	5.75e-23	1.09e-11	1.71e-32	3.29e-22	1.07e-42	2.1e-103	8.03e-05	1.29e-09	4.67e-80	2.3e-87	3.85e-30	1.41e-77	3.65e-118	8.17e-19	1.37e-09	5.54e-35	3.22e-07	7.77e-47	3.78e-21	7.9e-22	5.76e-15
M_21pcw_V1C	2.53e-127	5.32e-24	9.27e-44	2.64e-23	2.15e-22	3.78e-05	3.4e-96	7.34e-23	4.92e-101	2.85e-08	1.06e-23	3.4e-11	8.25e-32	9.77e-23	2.98e-43	3.68e-101	0.000461872	3.6e-10	1.51e-81	3.06e-88	3.02e-30	2.17e-80	7.18e-120	7.06e-19	7.43e-09	3.06e-34	2.62e-07	4.57e-46	5.52e-23	1.39e-20	3.41e-14
M_21pcw_S1C	8.25e-129	1.08e-24	2.09e-43	4.25e-23	3.02e-22	2.06e-05	1.7e-96	2.55e-22	7.77e-100	7.75e-08	7.59e-23	3.01e-11	1.37e-31	1.16e-22	7.49e-46	1.22e-104	0.000153506	8.43e-10	5.41e-81	7.25e-88	5.34e-31	3.31e-80	4.14e-120	6.46e-20	6.17e-10	3.81e-35	1.72e-07	5.91e-47	4.78e-22	7.37e-22	5.37e-15
M_21pcw_CBC	5e-119	4.67e-23	2.33e-39	6.65e-21	2.21e-20	8.1e-05	1.22e-85	6.83e-22	1.2e-103	4.37e-08	1.55e-21	1.02e-10	5.88e-30	3.71e-22	4.64e-49	5.94e-108	4.88e-05	1.46e-09	7.35e-75	1.5e-83	6.04e-28	5.04e-74	6.78e-113	3.22e-16	2.2e-08	1.66e-30	1.05e-06	7.42e-49	2.86e-22	1.01e-21	1.89e-15
M_21pcw_IPC	8.35e-127	5.92e-24	1.22e-42	1.2e-22	6.21e-22	2.64e-05	1.07e-95	2.61e-22	2.45e-100	1.06e-07	3.22e-22	4.05e-11	5.34e-31	1.97e-22	2.46e-44	2.01e-103	0.000342473	2.21e-10	1.73e-81	1.75e-87	8.95e-30	2.85e-76	2.37e-117	1.05e-18	1.31e-09	1.11e-34	3.34e-07	9.68e-46	7.76e-22	2.97e-21	1.4e-14
M_21pcw_DFC	2.84e-124	2.78e-23	1.98e-41	2.18e-22	5.78e-21	6.56e-05	6.11e-91	5.98e-22	1.7e-99	5.34e-08	1.13e-22	9.82e-12	7.24e-32	6.35e-23	5.31e-44	6.03e-103	0.000476091	1.06e-09	2.23e-81	1.06e-88	1.15e-29	1.06e-77	3.34e-119	1.65e-18	1.38e-09	1.67e-34	6.29e-08	1.19e-53	5.01e-25	6.78e-21	1.16e-14
M_24pcw_HIP	2.22e-120	4.74e-23	1.06e-35	4.64e-20	1.55e-17	0.000263901	1.96e-80	1.28e-22	1.49e-102	2.66e-07	3.75e-22	8.01e-13	9.61e-31	6.04e-23	5.38e-50	2.64e-109	8.12e-06	4.36e-09	4.83e-74	9.49e-85	3.85e-29	8.02e-78	2.15e-116	1.78e-17	9.92e-09	1.76e-34	3.94e-07	1.07e-56	4.21e-24	7.31e-23	4.5e-16
M_24pcw_AMY	8.63e-118	1.08e-22	2.57e-37	1.1e-20	1.57e-18	0.000424925	1.5e-83	2.72e-22	5.94e-106	4.98e-07	9.78e-23	4.64e-12	2.65e-32	6.12e-23	1.89e-47	5.4e-106	7.98e-05	6.77e-10	3.69e-76	3.17e-83	1.04e-26	2.72e-74	2.21e-113	3.57e-15	1.23e-08	2.05e-30	4.22e-06	1.13e-55	3.22e-25	5.94e-22	6.41e-16
M_24pcw_DFC	4.53e-129	2.5e-24	3.91e-41	5.27e-22	4.68e-21	2.38e-05	4.52e-93	1.75e-21	4.27e-102	1.98e-07	1.17e-22	5.51e-11	2.25e-30	1.77e-22	2.85e-46	2.61e-102	1.03e-05	1.93e-09	9.67e-77	1.59e-86	5.41e-30	9.44e-79	1.01e-119	6.46e-18	1.93e-09	1.45e-34	4.35e-07	1.75e-58	1.9e-24	3.71e-23	6.78e-16
M_24pcw_S1C	7e-130	7.81e-25	2.17e-42	6.15e-23	2.22e-21	2.04e-05	1.38e-93	8.77e-23	1.26e-103	5.13e-08	6.83e-24	3.7e-11	4.77e-33	6.71e-24	6.48e-47	1.61e-104	6.66e-06	4.55e-10	5.42e-80	2.19e-89	6.13e-32	5.57e-80	5.82e-122	3.87e-20	5.05e-10	1.66e-35	6.54e-08	2.1e-56	1.49e-26	3.51e-22	1.01e-15
M_24pcw_MD	5.96e-119	8.73e-23	3.32e-34	2.11e-18	1.07e-17	2.36e-05	7.1e-75	8.01e-21	5.29e-102	6.91e-09	1.19e-22	1.34e-11	3.55e-30	8.72e-20	7.37e-49	6.07e-108	2.01e-06	7.63e-08	9.48e-72	1.31e-81	7.27e-29	6.01e-74	1.65e-113	1.12e-16	1.82e-09	2.38e-33	1.16e-06	5.16e-66	5.34e-28	1.87e-23	5.07e-17
M_24pcw_STR	7.54e-123	7.64e-25	8.81e-41	3.41e-21	1.53e-21	8.35e-05	1.13e-89	6.34e-21	1.36e-105	3.37e-08	1.41e-22	1.16e-12	1.25e-31	2.03e-24	6.53e-49	8.94e-112	3.16e-05	3.79e-09	1.04e-79	3.16e-87	1.78e-30	6.52e-83	1.62e-122	1.48e-18	4.58e-08	1.7e-34	1.04e-06	7.53e-56	7.08e-24	1.43e-21	3.21e-15
M_24pcw_A1C	1.29e-125	8.79e-24	1.29e-41	1.65e-22	4.95e-21	2.47e-05	1.19e-92	3.04e-22	1.43e-103	6.64e-08	5.05e-23	4.57e-11	7.18e-32	3.33e-22	1.04e-45	6.06e-106	3.92e-05	1.01e-10	1.29e-78	8.47e-88	6.48e-31	6.38e-81	6.27e-121	5.23e-19	6.37e-10	2.55e-35	2.23e-07	2.66e-53	4.81e-23	1.19e-22	4.72e-16
M_24pcw_IPC	4.12e-127	2.42e-23	6.3e-41	5.36e-22	7.47e-21	4.05e-05	1.68e-91	1.72e-22	2.56e-100	2.9e-08	1.68e-23	4.09e-11	8.17e-32	1.89e-21	1.08e-43	2.19e-105	1.57e-05	4.58e-10	1.05e-78	3.42e-87	4.14e-31	5.22e-80	1.45e-121	4.81e-19	3.26e-09	1.08e-35	1.63e-07	2.53e-50	1.48e-21	2.74e-21	2.83e-15
M_24pcw_OFC	6.63e-127	3.76e-23	9.96e-39	4.21e-21	1.55e-19	5.74e-05	5.6e-88	3.68e-24	4.09e-100	2.25e-07	9.24e-23	1.25e-11	4.44e-30	2.72e-21	8.78e-45	4.63e-104	3.63e-05	3.83e-09	1.8e-78	1.5e-85	1.39e-30	5.15e-77	1.75e-118	1.6e-18	3.23e-10	2.76e-34	3.19e-07	1.05e-51	1.35e-22	2.45e-21	8.01e-15
M_24pcw_STC	2.41e-123	1.33e-23	1.23e-37	6.23e-21	1.32e-18	2.76e-05	1.16e-84	6.41e-22	1.6e-98	1.3e-07	2.25e-23	1.57e-11	8.94e-33	1.64e-22	2.48e-42	1.81e-102	5.21e-05	3.59e-09	1.05e-77	8.77e-88	7.18e-29	7.43e-79	2.46e-120	2.47e-17	7.51e-10	1.65e-33	1.41e-07	4.21e-61	2.58e-27	1.08e-21	1.61e-15
M_24pcw_ITC	2.97e-128	3.35e-24	1.23e-42	7.68e-23	9.95e-22	5.18e-05	6.63e-96	3.64e-23	2.41e-99	9.44e-08	1.54e-23	1.15e-11	9.29e-32	2.14e-22	1.03e-45	9.54e-104	1.36e-05	8.81e-11	2.35e-79	2.54e-86	7.66e-32	2.56e-83	2.78e-123	5.3e-20	6.41e-10	5.27e-36	9.15e-08	1.6e-48	3.05e-23	4.4e-23	8.15e-16
M_24pcw_VFC	1.12e-128	2.34e-24	4.6e-39	3.95e-21	7.59e-20	3.84e-05	6e-89	8.9e-22	4.2e-100	1.28e-07	2.57e-24	2.02e-11	1.9e-31	4.14e-23	3.03e-45	1.96e-104	5.1e-05	4.79e-09	3.48e-77	1.01e-87	3.99e-30	1.42e-77	1.82e-120	9.65e-19	7.64e-10	5.79e-35	1.03e-06	7.38e-59	3.1e-25	4.93e-23	1.77e-16
M_24pcw_M1C	1.09e-124	3.96e-23	7.57e-39	1.62e-21	3.07e-19	2.75e-05	1.8e-86	4.57e-21	2.55e-102	5.87e-08	2.26e-22	1.24e-11	9.59e-32	1.41e-22	1.44e-45	9.38e-104	1.39e-05	9.83e-09	5.05e-77	3.87e-88	1.8e-31	4.32e-80	2.38e-120	1.55e-19	1.55e-09	1.16e-34	5.46e-07	7.3e-59	6.09e-25	1.03e-22	9.74e-16
M_24pcw_MFC	8.61e-129	2.8e-26	1.03e-41	1.43e-22	4.57e-21	2.6e-05	2.73e-94	3.85e-22	1.03e-102	3.53e-07	8.96e-24	4.16e-11	4.36e-31	5.66e-23	5.9e-47	2.71e-106	1.73e-05	1.39e-09	1.16e-76	1.39e-87	2.05e-30	4.1e-80	1.51e-121	1.31e-18	2.63e-09	2.26e-35	7.89e-07	3.58e-54	1.4e-24	2.53e-23	4.35e-16
M_24pcw_CBC	1.12e-116	4.27e-22	9.9e-36	2.88e-19	2.31e-18	7.02e-05	3.11e-78	5.02e-21	1.38e-102	2.5e-08	4.68e-21	2.22e-10	1.92e-28	9.08e-23	8.66e-51	4.35e-107	9.81e-07	4.02e-09	1.14e-70	5.75e-81	1.26e-27	4.55e-72	5.68e-111	2e-16	2.13e-08	2.91e-31	9.22e-07	7.82e-53	2.09e-22	8.24e-22	2e-15
M_24pcw_V1C	6.7e-126	7.95e-25	4.6e-41	2.09e-22	1.41e-20	2.6e-05	2.47e-91	1.33e-23	1.01e-103	8.2e-08	5.02e-24	1.79e-11	1.97e-32	2.03e-23	7.46e-45	1.59e-103	3.41e-05	3.85e-10	3.45e-80	3.39e-88	7.51e-29	5.52e-78	2.92e-120	4.08e-17	3.68e-09	8.02e-34	2.97e-07	2.34e-59	9.72e-27	1.19e-21	4.87e-15
F_25pcw_A1C	2.39e-112	3.57e-21	1.69e-34	3.97e-20	2.73e-16	0.000127055	5.01e-76	2.04e-20	8.23e-92	1.95e-07	1.3e-20	8.62e-11	2.62e-28	1.02e-19	5.79e-39	3.43e-99	0.000610302	2.15e-08	3.62e-78	3.17e-83	1.37e-27	3.06e-68	4.11e-109	4.38e-17	1.13e-08	3.11e-34	5.97e-07	3.54e-62	1.36e-29	6.9e-23	5.03e-18
F_26pcw_STC	1.04e-118	2.63e-22	1.12e-39	3.04e-21	2.35e-20	0.000115219	2.97e-89	1.79e-20	5.37e-106	6.67e-07	1.52e-21	3.12e-11	5.35e-30	1.14e-23	4.17e-47	6.74e-103	0.000356659	3.2e-10	9.39e-73	1.76e-81	2.56e-28	8.29e-76	6.26e-112	1.15e-16	6.58e-08	9.4e-31	2.65e-06	4.8e-47	8.27e-21	9.13e-21	3.11e-14
F_26pcw_V1C	2.09e-111	1.4e-21	1.08e-33	1.18e-19	5.97e-16	6.03e-05	1.08e-73	4.71e-19	1.83e-90	3.51e-07	5.15e-22	3.12e-11	8.45e-29	2.27e-19	3.66e-38	1.65e-99	0.00056976	2.84e-08	4.29e-77	5.41e-81	1.04e-26	5.11e-67	5.73e-107	2.87e-16	7.62e-08	8.03e-34	5.12e-06	6.97e-62	2.68e-28	6.3e-22	1.39e-17
F_26pcw_DFC	4.58e-111	6.03e-21	6.81e-34	1.27e-19	3.54e-16	0.000168924	1.45e-74	5.31e-20	7.27e-95	1.97e-07	1.7e-20	5.13e-11	2.82e-28	2.62e-19	3.2e-39	5.86e-100	0.00023085	8.24e-08	7.21e-78	1.57e-80	3.17e-26	3.57e-68	2.48e-108	6.79e-16	2.2e-08	3.32e-34	2.86e-06	2.64e-64	2.68e-30	2.7e-22	3.29e-18
F_35pcw_CBC	4.75e-107	4.14e-23	1.51e-30	4.67e-18	2.16e-14	0.00027083	4.2e-68	5.55e-21	4.6e-88	1.5e-06	5.53e-22	3.36e-09	1.83e-30	1.14e-20	3.59e-34	5.42e-91	0.000915909	3.79e-07	2.75e-62	2.1e-75	1.59e-21	1.13e-63	2.94e-97	6.43e-12	7.31e-08	2.55e-24	5.01e-06	2.34e-54	8.81e-26	1.6e-19	2.04e-15
F_35pcw_VFC	1.7e-124	7.61e-26	1.41e-36	5.1e-21	1.79e-17	0.00018691	1.35e-80	2.08e-23	1.17e-101	8.32e-08	2.08e-24	1.08e-13	5.86e-36	1.15e-21	4.96e-40	4.1e-101	0.000224117	6.8e-09	1.01e-82	3.68e-92	2.78e-28	1.12e-78	1.8e-123	1.75e-17	1.53e-10	8.68e-36	4.27e-06	3.61e-60	1.74e-28	2.88e-21	7.96e-16
M_37pcw_A1C	1.65e-118	2.56e-23	1.8e-38	1.69e-21	6.97e-19	6.92e-05	2.49e-82	3.01e-22	2.97e-97	1.48e-07	8.37e-23	6.54e-13	1.72e-31	6.41e-21	5.56e-44	6.32e-101	0.000163759	4.4e-09	1.66e-76	2.87e-86	4.58e-29	8.81e-76	1.69e-116	4.33e-18	3.2e-09	1.55e-36	8.97e-08	9.95e-69	7.08e-31	4.54e-23	2.27e-17
M_37pcw_OFC	2.84e-116	8.03e-24	2.14e-36	2.87e-20	5.04e-18	0.000121818	1.62e-78	1.17e-21	3.65e-101	1.58e-07	9.5e-24	6.03e-12	4.54e-32	4.94e-23	1.76e-41	2.11e-100	0.000334011	1.78e-08	1.15e-76	4.87e-86	4.59e-28	8.65e-74	3.73e-114	1.38e-17	4e-09	2.47e-35	5.07e-07	7.9e-65	6.42e-29	1.12e-21	1.57e-16
M_37pcw_AMY	7.67e-107	1.22e-22	5.69e-32	7.81e-19	4.78e-15	0.000855538	3.15e-67	1.92e-20	6.28e-95	2.9e-07	1.44e-22	2.29e-11	9.26e-31	1.09e-20	3.01e-40	7.38e-98	8.46e-05	1.69e-07	5.22e-72	1.74e-78	1.48e-25	2.16e-67	6.35e-105	2.52e-15	2.41e-07	1.99e-31	1.42e-05	1.04e-69	1.16e-31	1.87e-21	3.07e-17
M_37pcw_V1C	3.62e-116	3.97e-23	9.26e-36	4.2e-20	1.49e-17	8.19e-05	1.61e-76	1.47e-21	3.89e-100	2.81e-07	5.35e-24	4.88e-12	8.51e-33	5.31e-23	1e-40	4.37e-102	0.000133155	1.71e-08	6.68e-78	3.9e-87	2.99e-28	2.79e-73	9.38e-113	2.39e-17	4.04e-09	7.83e-35	3.63e-07	6.5e-69	8.25e-32	2.92e-21	7e-17
M_37pcw_MFC	3.62e-116	9.07e-24	2.9e-36	1.53e-20	1.26e-17	0.000106795	7.44e-78	5.48e-22	7.58e-100	2.07e-07	8.13e-23	4.24e-12	3.64e-31	3.02e-22	9.76e-43	6.48e-101	0.000211184	1.42e-08	1.13e-76	1.98e-86	9.26e-28	8.5e-76	2.22e-115	1.92e-17	1.6e-09	4.27e-35	4.78e-07	7.09e-67	1.43e-30	1.42e-21	7.85e-17
M_37pcw_MD	3.69e-103	4.18e-21	6.15e-28	1.59e-16	2.74e-13	0.000644602	1.52e-57	1.69e-19	1.74e-94	7.36e-08	1.63e-21	1.55e-10	6.74e-28	9.95e-20	1.12e-38	1.95e-93	4.73e-05	1.83e-06	7.97e-65	1.2e-74	1.01e-21	6.51e-63	6.95e-97	1.65e-11	2.53e-07	1.91e-26	2.29e-05	1.83e-76	3.27e-34	2.8e-22	2.2e-18
M_37pcw_CBC	2.2e-110	2.1e-22	1.77e-33	4.41e-19	2.75e-16	0.000161324	5.85e-71	7.76e-22	1.68e-101	1.81e-07	5.33e-22	3.05e-10	5.73e-31	4.07e-23	5.23e-42	1.15e-97	4.61e-05	6.58e-08	1.96e-72	4.89e-82	1.76e-25	6.78e-68	1.52e-105	1.14e-14	1.47e-07	2.03e-28	2.46e-06	4.88e-71	1e-30	3.02e-22	1.41e-17
M_37pcw_STR	3.52e-106	1.22e-22	1.07e-31	6.76e-18	1.13e-15	0.000302096	2.69e-67	1.48e-20	9.98e-93	2.17e-07	3.52e-22	2.07e-11	2.22e-29	1.88e-20	4.27e-38	5.7e-94	0.000103513	9.46e-08	2.13e-73	6.14e-80	1.66e-24	2.74e-66	7.56e-103	7.17e-15	1.81e-07	9.39e-30	1.15e-05	7.94e-71	1.67e-32	4.53e-21	3.58e-17
M_37pcw_IPC	3.11e-120	1.96e-23	1.31e-38	2.82e-21	3.07e-19	8.94e-05	1.95e-83	4.23e-22	9e-101	9.65e-08	2.32e-22	4.07e-12	3.24e-32	7.98e-23	5.5e-44	7.56e-102	5.62e-05	4.08e-09	5.25e-79	2.3e-89	1.57e-29	2.85e-78	4.66e-118	1.5e-18	8.09e-10	7.71e-37	3.28e-07	6.84e-63	3.31e-28	3.84e-22	3.63e-17
M_37pcw_ITC	8.04e-119	1.01e-24	2.01e-38	2.62e-21	5.07e-19	5.96e-05	8.21e-83	3.28e-21	8.82e-99	1.01e-07	3.27e-24	4.08e-12	2.06e-33	5.11e-22	7.29e-41	3.93e-99	0.000181088	1.63e-08	4.33e-79	4.07e-89	6.07e-29	1.04e-75	3.89e-118	1.78e-18	1.52e-09	3.74e-36	3.56e-07	4.02e-64	3.11e-28	1.15e-21	6.32e-17
M_37pcw_S1C	7.61e-115	3.1e-23	1.06e-35	1.84e-20	3.8e-17	0.000129571	2.12e-75	2.28e-21	1.13e-99	2.23e-07	1.07e-22	3.36e-12	1.06e-30	2e-20	1.67e-41	1.16e-99	0.000142854	3.93e-08	7.84e-75	2.52e-85	1.49e-28	4.74e-74	7.16e-114	7.72e-18	8.73e-09	2.08e-34	5.55e-07	5.07e-72	9.07e-31	1.11e-22	1.79e-17
M_37pcw_DFC	9.95e-118	4.36e-24	3.5e-36	1.63e-20	1.43e-17	6.83e-05	3.29e-77	6.31e-22	1.06e-99	1.72e-07	1.46e-22	6.13e-12	5.02e-32	3.54e-21	2.43e-41	1.16e-101	0.000260443	2.57e-08	1.86e-76	8.13e-87	1.43e-28	1.22e-76	5.2e-116	5.56e-18	2.64e-09	2.68e-35	2.01e-07	6.36e-67	1.54e-30	9.93e-22	1.14e-16
M_37pcw_STC	4.24e-118	7.06e-24	4.05e-37	6.44e-21	4.17e-18	0.000130592	2.89e-79	5.11e-21	3.74e-100	1.83e-07	2e-23	4.06e-12	5.56e-33	4.57e-22	1.99e-41	1.56e-99	0.000316299	3.02e-08	5.85e-77	3.54e-88	4.09e-29	2.17e-76	2.13e-117	2.66e-18	2.75e-09	4.39e-36	4.51e-07	2.22e-67	1.75e-30	2.36e-22	5.8e-17
M_37pcw_M1C	2.12e-113	3.33e-23	1.66e-34	7.89e-20	1.4e-16	0.000181886	5e-74	5.64e-22	4.53e-98	2.2e-07	1.11e-22	1.59e-11	1.76e-31	5.73e-23	6.97e-41	6.12e-98	6.75e-05	1.04e-07	3.48e-75	1.97e-85	7.86e-27	1.78e-71	8.64e-112	7.1e-17	2.92e-09	1.33e-33	1.94e-06	9.76e-75	9.77e-33	3.89e-21	4.74e-17
M_37pcw_VFC	8.35e-116	7.96e-24	4.9e-35	9.13e-20	3.65e-17	0.00012533	2.98e-75	6.93e-22	1.43e-100	2.28e-07	1.1e-23	1.78e-11	4.28e-31	3.17e-22	2.12e-40	8.5e-98	0.000416883	3.41e-08	6.01e-75	8.89e-85	5.71e-28	2.98e-74	8.56e-113	1.23e-17	2.24e-09	1.29e-34	5.16e-07	3.92e-70	1.81e-31	1.22e-21	8.08e-17
M_37pcw_HIP	7.18e-106	1.15e-23	1.24e-31	5e-19	1.53e-14	0.000677268	8.84e-67	1.71e-20	9.89e-94	2.72e-07	5.33e-23	7.57e-11	1.46e-30	1.67e-19	4.99e-37	3.52e-95	0.00032613	2.76e-07	5.84e-71	2.22e-78	7.4e-22	8.37e-65	2.18e-100	1.47e-12	7.85e-08	6.21e-30	7.83e-06	7.6e-73	8.72e-35	4.03e-21	1.97e-17
M_4mos_STC	5.33e-116	6.61e-22	1.14e-39	5.14e-22	1.44e-19	0.00016814	1.16e-86	1.77e-22	3.72e-93	2.21e-07	1.76e-20	1.62e-11	2.6e-27	6.45e-20	1.78e-44	7.93e-103	8.65e-05	5.35e-09	5.4e-76	8.9e-83	2.43e-31	3.34e-77	8.48e-118	3.5e-20	6.7e-09	1.65e-38	2.66e-07	8.07e-46	4.51e-21	9.98e-23	1.73e-16
M_4mos_STR	7.31e-114	1.81e-21	2.32e-34	2.12e-18	7.37e-18	0.000101315	4.8e-74	6.51e-21	1.73e-95	1.77e-07	4.82e-22	2.37e-10	1.09e-30	9.37e-21	5.97e-40	4.31e-100	6.94e-05	1.89e-08	2.25e-81	5.43e-88	1.4e-29	1.25e-77	3.03e-117	4.98e-19	2.27e-08	5.72e-36	7.51e-07	1.42e-59	9.24e-26	6.7e-21	9.7e-16
M_4mos_V1C	1.85e-124	1.33e-23	5.24e-42	2.72e-23	1.22e-20	6.37e-05	4.51e-92	2.52e-21	5.17e-100	6.59e-08	4.1e-22	8.24e-12	1.28e-30	4.08e-22	4.43e-45	7.16e-106	0.000507553	6.12e-10	6.71e-83	4.74e-91	2.53e-32	7.12e-82	5.43e-125	4.09e-21	1.26e-09	9.26e-41	4.08e-08	5.37e-54	4.03e-25	2.19e-23	4.39e-17
M_4mos_CBC	1.85e-111	6.26e-21	6.67e-32	6.52e-19	6.59e-15	4.99e-05	1.51e-68	1.79e-20	6.9e-98	2.39e-06	4.38e-20	8.38e-11	1.72e-28	1.69e-20	4.98e-44	6.27e-98	3.39e-05	1.07e-08	2.16e-68	9.84e-81	8.59e-27	1.15e-70	3.25e-108	1.07e-15	5.38e-08	6.85e-30	1.54e-06	6.4e-63	2.73e-26	1.34e-22	1.39e-16
M_4mos_HIP	7.39e-118	2.65e-22	8.52e-38	1.3e-20	4.34e-19	5e-05	1.44e-83	2.84e-21	9.56e-97	3.03e-07	2.21e-22	1.42e-11	6.22e-30	4.66e-20	9.43e-44	1.91e-105	0.000163291	2.49e-08	4.88e-80	1.55e-86	1.64e-30	2.73e-75	1.12e-116	1.23e-19	9.77e-09	9.42e-40	8.24e-08	2.18e-53	8.93e-26	9.31e-23	3.02e-17
M_4mos_MD	6.84e-115	3.14e-21	4.88e-35	3.66e-19	9.16e-18	7e-05	1.56e-76	5.65e-20	6.14e-98	1.2e-07	2.47e-22	1.08e-09	8.62e-28	4.09e-19	7.02e-46	7.71e-103	8.79e-05	1.47e-08	1.13e-70	1.59e-78	3.86e-29	2.88e-73	2.84e-112	1.85e-17	1.15e-08	3.79e-36	4.1e-07	2.22e-53	5.64e-24	4.44e-23	9e-18
M_4mos_ITC	6.06e-115	7.9e-20	2.02e-39	9.49e-22	1.39e-19	0.000237505	1.15e-86	2.24e-21	7.84e-93	5.23e-07	2.86e-20	9.55e-12	2.91e-27	2.47e-19	2.46e-45	4.97e-104	8.51e-05	3.68e-09	1.48e-73	1.55e-81	3.37e-32	4.16e-75	2.27e-114	3.5e-20	3.37e-09	2.96e-38	3.13e-07	8.07e-41	1.96e-19	1.83e-22	1.03e-16
M_4mos_AMY	3.83e-118	8.78e-23	4.75e-37	1.42e-20	2.24e-18	0.000158006	1.79e-81	1.27e-21	1.46e-99	8.52e-08	1.62e-23	2.43e-12	2.48e-31	1.51e-20	2.23e-44	9.11e-110	0.000153081	5.55e-09	3.19e-81	2.67e-88	1.63e-29	1.96e-77	5.05e-119	3.77e-19	3.1e-09	4.16e-39	2.46e-07	7.83e-59	1.98e-27	5e-23	1.57e-17
M_4mos_MFC	1.05e-117	9.39e-22	1.06e-38	1.8e-21	3.87e-19	0.000138581	3.69e-86	7.94e-21	1.36e-94	2.3e-07	2.08e-21	1.46e-11	6.56e-31	3.63e-21	1.33e-44	1.49e-104	0.000157858	7.38e-09	5.82e-75	5.86e-86	2.51e-31	1.4e-77	1.83e-117	1.51e-19	3.69e-09	6.85e-39	2.49e-07	1.07e-49	3.18e-22	1.94e-22	1.63e-16
M_4mos_M1C	2.74e-115	1.68e-22	7.75e-36	1.05e-20	4.75e-17	0.000252351	1.91e-78	3.92e-20	1.96e-94	7.5e-08	3.59e-22	6.57e-11	1.24e-28	8.42e-19	4.87e-41	5.49e-100	8.78e-05	1.32e-08	9.09e-77	3.1e-84	1.96e-27	5.49e-73	3.9e-113	1.74e-16	3.26e-08	9.16e-36	1.44e-06	3.45e-63	4.64e-28	9.33e-23	2.13e-17
M_4mos_DFC	2.77e-108	5.84e-22	7.48e-32	1.14e-18	4.39e-15	0.000406235	7.51e-69	3.62e-20	2.22e-93	1.22e-07	5.17e-21	1.89e-11	6.73e-28	5.08e-19	9.91e-39	5.13e-96	1.34e-05	5.61e-07	1.93e-72	4.69e-79	4.82e-27	2.48e-71	1.35e-108	7.1e-16	2.08e-08	5.46e-33	1.4e-06	3.31e-61	3.98e-27	2.9e-21	2.35e-16
M_4mos_OFC	3.73e-115	4.45e-23	1.42e-35	1.69e-20	5.5e-17	0.000508769	1.71e-77	1.69e-21	1.77e-95	5.91e-08	3.18e-22	1.86e-11	1.8e-29	2.71e-18	5.63e-39	2.41e-101	0.000119602	7.87e-08	9.29e-78	4.69e-85	6.62e-28	3.63e-75	3.04e-114	3.29e-17	4.82e-08	5.05e-35	2.05e-06	6.87e-64	8.69e-29	1.04e-22	7.29e-17
M_4mos_A1C	1.09e-108	8.58e-22	3.74e-32	4.55e-19	5.26e-15	0.000276936	1.18e-69	2.38e-19	1.36e-93	2.3e-07	8.02e-22	1.49e-11	3.72e-28	3.06e-19	3.95e-38	8.83e-97	2.48e-05	3.4e-07	2.19e-72	4.64e-79	3.65e-27	2.58e-75	4.39e-109	2.45e-16	8.47e-08	3.46e-33	4.3e-06	5.14e-62	1.68e-26	1.6e-22	2.47e-17
M_4mos_STC.1	2.24e-108	9.11e-21	1.42e-32	3.71e-19	2.5e-15	0.000451969	3.08e-70	3.58e-20	1.26e-92	1.29e-07	4.06e-21	1.17e-11	6.44e-29	1.8e-18	2.29e-38	2.22e-95	5.28e-05	1.64e-07	2.96e-73	3.96e-80	3.13e-27	1.9e-74	7.78e-110	3.33e-16	6.22e-08	2.42e-33	1.98e-06	2.14e-58	7.91e-27	4.89e-22	6.17e-17
M_4mos_VFC	5.07e-113	3.88e-23	2.7e-34	6.55e-20	2.69e-16	0.000238821	2.38e-74	8.67e-21	1.77e-95	1e-07	4.52e-23	3.37e-11	6.85e-30	9.59e-20	1.85e-39	7.51e-100	3.19e-05	1.68e-07	2.16e-75	3.13e-83	1.88e-27	1.03e-71	3.04e-112	2.51e-16	1.06e-08	8.66e-35	8.39e-07	6.17e-65	1.4e-28	2.06e-22	6.06e-17
M_4mos_ITC.1	1.43e-110	3.26e-21	8.1e-34	1.45e-19	3.72e-16	0.000331235	6.65e-73	1.09e-21	6.64e-92	8.92e-08	3.72e-21	4.08e-12	6.58e-28	2.51e-17	5.3e-40	5.29e-99	3.36e-05	2.47e-07	2.54e-75	1.06e-80	6.92e-28	1.27e-72	9.85e-111	1.56e-16	4.38e-08	1.07e-34	1.09e-06	2.63e-61	1.26e-26	1.89e-22	6.94e-17
M_4mos_AMY.1	2.24e-113	2.71e-23	6.04e-35	1.75e-20	2.17e-16	0.000291979	8.85e-76	1.82e-20	8.38e-96	1.46e-07	1.3e-22	8.62e-11	5.43e-30	6.74e-20	1.31e-41	3.65e-102	3.77e-05	2.73e-08	3.51e-74	6.29e-82	1.34e-26	3.13e-72	2.73e-111	3.99e-16	2.31e-08	8.83e-34	2.03e-06	6.18e-65	7.01e-29	1.83e-23	3.52e-18
M_4mos_M1C.1	2.39e-121	8.69e-23	4.71e-38	8.91e-22	3.37e-18	5.96e-05	1.79e-83	1.4e-23	3e-100	5.32e-08	2.27e-22	3.68e-12	2.56e-31	1.7e-22	2.14e-45	2.41e-107	6.06e-05	2.11e-09	4.23e-83	4.25e-93	7.54e-33	1.94e-80	2.33e-122	2.7e-21	4.79e-10	1.77e-39	2.16e-07	1.32e-61	1.54e-28	2.56e-24	2.69e-17
M_4mos_MD.1	7.04e-118	3.72e-22	1.07e-34	7.15e-19	1.03e-17	8.41e-06	4.92e-77	1.77e-20	4.37e-101	4.61e-08	3.46e-23	1.59e-10	3.23e-29	6.33e-20	3.28e-45	4.39e-105	9.61e-06	1.28e-08	1.96e-72	1.21e-80	7.43e-31	3.59e-80	1.64e-117	9.58e-19	4.62e-09	4.2e-37	4.48e-07	5.41e-58	4.58e-25	3.67e-24	8.03e-18
M_4mos_OFC.1	3.21e-120	9.98e-23	3.9e-36	7.64e-21	3.29e-17	3.78e-05	2.33e-78	1.85e-21	8.31e-99	7.41e-08	4.56e-23	8.8e-13	1.95e-32	2.59e-20	4.03e-44	3.16e-107	0.000127328	1.18e-08	1.69e-79	1.18e-88	3.59e-32	8.21e-82	1.76e-123	2.91e-20	5.49e-10	4.91e-38	3.52e-07	1.61e-54	6.45e-26	5.77e-23	6.1e-17
M_4mos_STR.1	2.47e-114	2.24e-21	4.71e-36	8.79e-20	3.64e-18	0.000200234	7.33e-79	6.9e-20	1.01e-95	6.25e-08	5.92e-22	6.67e-12	5.53e-28	1.67e-20	5.07e-44	2.36e-104	1.37e-05	1.43e-08	6.51e-78	8.12e-86	3.8e-30	4.02e-78	1.42e-115	5.41e-19	2.2e-08	7.22e-36	1.16e-06	1.51e-57	7.61e-26	1.88e-22	1.66e-16
M_4mos_STC.2	1.63e-120	5.79e-22	3.54e-38	9.38e-22	2.42e-18	0.000106709	1.39e-83	1.95e-21	3.73e-99	1.06e-07	1.35e-22	1.88e-13	4.41e-32	1.9e-20	1.3e-45	4.3e-105	3e-05	1.97e-09	1.29e-81	6.44e-90	3.04e-32	4.27e-82	2.39e-122	2.05e-20	5.32e-10	1.76e-39	3.09e-07	7.93e-58	1.97e-27	9.12e-23	9.27e-17
M_4mos_A1C.1	9.8e-121	2.06e-22	2.34e-38	7.15e-22	2.09e-18	7.19e-05	4.02e-84	8.98e-22	1.41e-100	1.71e-07	3.08e-22	4.17e-12	6.66e-31	2.71e-22	5.45e-45	1.19e-104	8.92e-05	2.59e-09	5.6e-79	6.3e-88	2.03e-31	2.48e-77	1.71e-120	8.31e-20	4.25e-10	4.03e-39	7.69e-08	2.9e-56	1.29e-25	1.7e-22	1.28e-16
M_4mos_HIP.1	8.65e-116	7.87e-21	1.17e-34	8.05e-20	9.72e-17	0.000219118	2.91e-76	6.87e-21	4.09e-97	8.46e-08	9.87e-22	5.75e-12	7.72e-29	1.76e-19	5.48e-44	1.94e-107	3.64e-05	1.92e-08	5.27e-77	8.61e-84	1.27e-28	2.53e-74	1.27e-113	1.89e-17	9.02e-10	3.82e-36	3.48e-07	9.34e-62	8.93e-28	2.82e-23	1.66e-17
M_4mos_AMY.2	5.96e-121	2.17e-22	5.4e-38	1.6e-21	2.2e-18	0.000147039	6.48e-85	2.68e-21	6.79e-100	1e-07	1.6e-23	7.36e-12	2.82e-30	2.66e-20	1.92e-45	3.27e-106	0.000154016	1.14e-08	5.63e-80	4.77e-89	1.49e-31	5.62e-79	1.15e-120	2.6e-20	1.45e-09	8.56e-39	2.76e-07	1.03e-59	1.03e-27	7.43e-24	1.51e-17
M_4mos_MFC.1	4.19e-121	1.54e-22	1.47e-39	2.67e-22	3.55e-19	0.00010789	9.45e-88	1.59e-22	9.21e-100	6.55e-08	1.64e-22	3.76e-12	3.63e-32	1.92e-21	1.33e-44	1.39e-107	0.000264976	3.12e-09	8.29e-84	1.39e-91	6.04e-33	1.26e-81	1.39e-123	2.5e-21	3.06e-10	3.48e-40	4.69e-08	2.95e-57	1e-26	6.88e-24	4.05e-17
M_4mos_V1C.1	1.31e-125	7.69e-23	1.92e-40	5.88e-23	2.05e-19	4.47e-05	9.87e-89	1.17e-22	1.7e-100	6.03e-08	8.05e-23	3.28e-12	1.24e-31	1.93e-22	1.77e-46	1.4e-108	0.000196453	3.42e-10	2.32e-82	1.23e-91	4.64e-32	1.87e-81	1.61e-123	3e-20	9.28e-10	1.83e-40	7.01e-08	1.16e-57	3.03e-27	2.99e-23	1.23e-16
M_4mos_ITC.2	5.76e-122	7.04e-22	5.68e-39	1.08e-21	3.45e-19	0.000107214	3.16e-86	3.27e-21	3.89e-99	8.4e-08	3.12e-22	1.31e-12	3.02e-31	3.15e-21	3.05e-45	5.87e-106	7.99e-05	1.54e-09	1.32e-81	2.82e-91	1.38e-32	6.03e-83	4.96e-122	4.34e-21	1.91e-10	2e-39	2.46e-07	2.69e-56	3.69e-26	2.66e-23	8.06e-17
M_4mos_S1C	6.44e-123	2.53e-22	1.13e-38	5.32e-22	1.36e-18	4.25e-05	4.03e-86	1.63e-21	1.5e-99	6.53e-08	7.69e-23	2.85e-12	3.28e-32	5.44e-22	7.81e-46	1.99e-107	0.000121052	4.46e-09	4.73e-82	1.92e-90	2.29e-33	1.24e-83	5.55e-124	5.84e-22	4.72e-10	3.71e-40	1.05e-07	1.76e-59	8.52e-28	4.28e-24	2.96e-17
M_4mos_IPC	1.08e-122	1.18e-22	4.73e-39	3.85e-22	7.86e-19	4.9e-05	3.67e-86	1.27e-22	1e-101	6.92e-08	7.17e-23	1.2e-12	2.89e-31	2.09e-20	2.46e-45	3.63e-103	0.000288527	1.88e-09	3.26e-81	4.16e-91	8.49e-33	1.82e-80	1.16e-124	4.64e-21	2.02e-10	8.74e-40	3.3e-08	3.8e-57	1.13e-25	1.38e-23	4.89e-17
M_4mos_CBC.1	9.65e-118	3.32e-23	2.95e-35	1.88e-20	1.01e-16	2.94e-05	1.61e-77	2.69e-21	6.69e-100	6.35e-07	7.54e-22	1.49e-10	3.64e-31	6.77e-22	8.93e-43	1.36e-102	7.64e-05	4.74e-09	2.56e-75	2.43e-86	3.28e-28	2.55e-73	5.99e-113	3.27e-17	7.47e-09	7.96e-32	4.69e-07	2.18e-61	2.08e-28	1.47e-23	1.35e-17
M_4mos_DFC.1	1.5e-121	1.3e-22	5.07e-39	8.36e-22	3.95e-19	0.000112629	5.02e-87	1.97e-21	1.31e-97	5.16e-08	8.98e-23	4.49e-12	3.75e-32	3.97e-22	2.42e-45	2.05e-104	0.000210406	1.03e-08	4.57e-83	1.2e-90	1.42e-33	6.63e-84	4.11e-125	5.1e-22	1.42e-10	7.3e-40	1.81e-07	3.23e-55	6.02e-27	8.43e-23	4.26e-16
M_4mos_VFC.1	1.52e-122	3.84e-23	3.33e-38	1.81e-21	1.2e-18	6.71e-05	5.99e-85	1.08e-22	3.52e-101	6.77e-08	2.05e-23	2.58e-12	8.34e-31	2.62e-22	1.83e-45	9.11e-105	3.71e-05	2.09e-09	6.36e-81	4.41e-90	5.26e-32	2.86e-80	1.25e-121	1.34e-20	3.91e-10	1.39e-39	6.05e-08	5.37e-57	1.64e-26	2.58e-23	2.93e-16
M_10mos_S1C	1.33e-116	9.63e-23	1.44e-33	6.04e-20	1.47e-15	2.55e-05	5.67e-74	2.27e-20	1.81e-94	2.83e-07	6.91e-21	2.75e-12	4.22e-29	9.81e-21	5.66e-44	3.77e-102	0.000196482	3.22e-08	1.63e-76	3.67e-85	5.96e-32	1.78e-75	4.27e-115	4.96e-20	2.93e-08	4.74e-37	9.51e-07	1.04e-53	6.88e-24	1.59e-22	1.54e-16
M_10mos_IPC	7.24e-114	1.7e-22	3.29e-34	5.81e-20	3.66e-16	3.89e-05	1.07e-76	3.79e-21	4.5e-97	6.71e-07	7.41e-22	1.34e-11	1.09e-30	9.62e-22	1.13e-43	2.89e-103	0.000118366	4.14e-08	7.96e-78	6.68e-86	4.96e-30	1.85e-73	3.98e-114	1.76e-18	3.09e-08	6.57e-36	3.87e-07	3.6e-55	3.28e-25	2.45e-22	1.11e-16
M_10mos_STC	9.48e-115	4.77e-22	1.12e-34	3.38e-20	2.13e-16	8.6e-05	1.43e-76	7.26e-21	7.31e-95	2.43e-07	2.58e-21	1.06e-11	1.45e-29	3.04e-21	9.87e-44	5.48e-103	0.000519443	4.15e-08	3.46e-78	3.98e-85	6.84e-30	4.86e-75	3.75e-115	1.94e-18	1.01e-08	1.88e-37	5.69e-07	4.11e-58	4.15e-25	2.01e-22	9.35e-17
M_10mos_DFC	1.58e-116	1.47e-22	1.15e-33	7.41e-20	9.78e-16	2.57e-05	1.06e-74	4.31e-20	1.9e-94	3.03e-07	1.16e-20	7.71e-12	5.11e-29	6.05e-20	8.89e-44	2.73e-106	0.000194832	3.44e-08	1.71e-75	1.67e-84	4.12e-31	1.03e-76	6.41e-115	2.4e-19	1.21e-08	2.57e-36	1.08e-07	3.48e-54	1.44e-23	2.05e-22	1.95e-16
M_10mos_OFC	2.17e-116	5.3e-22	8.25e-35	2.1e-20	2.48e-16	6.21e-05	4.35e-77	7.52e-21	2.44e-95	2.01e-07	1.86e-20	6.26e-12	4.69e-29	7.17e-20	4.82e-44	1.45e-105	0.000312967	2.03e-08	6.94e-78	3.11e-86	1.4e-30	6.31e-80	4.46e-116	9.1e-19	6.99e-09	3.07e-37	6.5e-07	1.28e-53	6.64e-24	2.5e-22	2.48e-16
M_10mos_MFC	1.52e-116	2.16e-23	6.01e-37	4.31e-21	9.07e-18	0.00011255	4.65e-82	1.09e-21	3.3e-98	3.31e-07	7.82e-23	1.87e-11	5.01e-31	2.25e-21	1.75e-45	7.49e-106	0.000274352	3.36e-09	1.35e-80	1.78e-86	4.87e-31	1.77e-78	8.88e-117	6.46e-20	6.59e-09	4.56e-38	8.7e-08	1.42e-56	5.63e-25	2.77e-22	7.01e-17
M_10mos_CBC	1.07e-114	1.8e-23	3.56e-37	5.44e-21	4.33e-18	1.83e-05	1.25e-84	8.78e-21	4.83e-97	1.67e-05	1.46e-20	1.16e-09	5.83e-30	3.56e-22	5.03e-42	1.94e-93	0.000295155	9.46e-10	1.33e-77	1.71e-82	3.15e-27	1.37e-69	7.03e-108	7.22e-17	2.97e-07	1.28e-30	1.26e-06	2.99e-57	1.46e-26	1.44e-22	3.16e-16
M_10mos_ITC	6.26e-115	7.07e-22	3.28e-35	1.42e-20	1.46e-16	2.22e-05	2.01e-78	7.69e-22	3.1e-92	2.46e-07	9.61e-22	7.72e-12	8.69e-31	2.99e-19	3.81e-41	2.1e-103	0.000386226	3.53e-08	8.57e-79	3.16e-87	8.57e-31	3.72e-79	8.67e-119	3.52e-19	4.25e-09	9.84e-38	8.92e-07	1.34e-51	3.55e-24	2.79e-21	4.41e-16
M_10mos_MD	8.83e-108	5.49e-21	2.8e-29	2.43e-16	8.57e-15	2.58e-05	3.19e-65	9.59e-19	2.99e-95	1.82e-07	7.56e-22	2.99e-10	6.08e-29	2.17e-19	4.89e-44	3.33e-103	0.000346142	1.75e-07	1.23e-72	8.52e-79	6.21e-28	1.35e-69	4.69e-107	2.08e-16	4.15e-08	4.31e-32	1.52e-06	1.95e-54	7.63e-26	2.94e-22	4.05e-17
M_10mos_V1C	1.89e-117	1.3e-22	5.41e-37	4.21e-21	8.36e-18	3.98e-05	2.25e-81	2.88e-21	2.14e-97	2.99e-07	1.28e-21	4.94e-12	6.53e-30	2.44e-21	9.86e-46	3.49e-104	0.00120002	3.52e-09	2.11e-80	1.13e-87	1.56e-31	5.66e-77	2.53e-118	5.23e-20	1.42e-08	6.34e-38	3.04e-07	1.58e-48	3.59e-24	1.05e-22	2.8e-16
F_1yrs_AMY	1.39e-119	3.22e-22	8.52e-40	6.44e-22	8.62e-20	0.000290762	8.41e-88	4.43e-22	1.55e-100	1.07e-07	6.9e-22	1.5e-10	2.02e-29	2.07e-21	1.92e-47	5.86e-110	0.000174899	9.04e-09	9.87e-81	6.96e-88	1.36e-32	5.04e-79	1.74e-120	1.39e-21	1.22e-09	9.12e-42	3.47e-08	3.34e-58	4.39e-27	8.35e-25	1.57e-18
F_1yrs_M1C	7.76e-114	7.78e-22	1.13e-39	5.78e-22	1.28e-19	0.000121901	1.87e-86	2.32e-19	1.36e-91	2.06e-07	1.51e-20	3.71e-10	7.29e-29	3.79e-21	9.02e-43	5.62e-100	0.000205473	8.22e-10	5.14e-75	5.6e-85	1.76e-31	6.13e-75	7.43e-113	5.03e-21	1.7e-10	1.01e-38	1.82e-07	6.12e-53	1.09e-23	1.26e-23	1.47e-17
F_1yrs_DFC	1.84e-123	1.8e-23	3.79e-42	2.8e-23	8.59e-21	0.000100683	1.33e-92	6.92e-22	4.21e-102	7.37e-08	8.47e-22	1.71e-10	4.26e-30	6.5e-23	1.14e-46	3.8e-106	6.25e-05	6.63e-10	9e-82	8.31e-91	2.15e-33	1.88e-83	9.65e-124	4.53e-22	1.93e-09	6.16e-42	1.9e-08	3e-55	1.75e-25	3.7e-25	4.46e-18
F_1yrs_STC	3.78e-124	2.08e-23	5.52e-43	1.13e-23	3.09e-21	9.86e-05	1.09e-94	2.3e-22	3.81e-102	8.33e-08	7.18e-22	1.6e-10	1.57e-29	3.93e-21	2.11e-48	6.28e-109	0.00013564	5.58e-10	9.77e-82	1.93e-90	8.3e-34	4.21e-84	4.77e-124	2.86e-22	4.49e-09	9.65e-42	4.38e-08	8.4e-53	6.78e-26	4.4e-25	2.55e-18
F_1yrs_V1C	3.72e-126	5.93e-24	1.64e-43	3.09e-24	3.3e-21	2.92e-05	1.04e-94	7.01e-23	3.89e-101	4.44e-08	3.13e-22	6.56e-11	2.82e-29	5.24e-21	2.98e-49	2.72e-110	0.000140598	1.98e-10	4.42e-81	9.65e-91	1.22e-33	7.42e-82	1.16e-124	1.41e-21	3.63e-09	2.44e-42	1.1e-08	1.01e-53	3.77e-24	8.7e-26	1.46e-18
F_1yrs_MFC	4.87e-119	8.02e-22	9.66e-41	2.73e-22	2.28e-20	0.000159402	1.08e-89	9.88e-22	5.05e-99	1.4e-07	5.32e-21	3.76e-10	1.3e-29	2.17e-20	4.33e-46	2.17e-107	1.81e-05	5.39e-10	2.51e-79	1.36e-87	7.57e-33	1.92e-81	2.69e-119	7.08e-22	1.27e-08	2.24e-41	1.47e-07	6.37e-55	2.47e-25	1.26e-24	3.64e-18
F_1yrs_OFC	1.59e-121	1.85e-23	3.12e-40	2.39e-22	8.43e-20	0.000157262	4.56e-88	5.43e-22	6.55e-101	5.84e-08	4.11e-22	7.7e-11	2.09e-30	1.8e-21	2.45e-46	1.61e-109	9.47e-05	6.15e-09	1.3e-81	1.9e-90	2.76e-32	5.45e-82	1.67e-121	5.47e-21	5.74e-09	2.18e-41	1.17e-07	6.36e-60	2.44e-27	1.44e-24	3.02e-18
F_1yrs_ITC	3.32e-124	9.67e-23	1e-42	1.17e-23	5.4e-21	0.000121091	9.24e-94	1.96e-22	2.08e-102	6.37e-08	1.24e-21	2.93e-11	1.21e-30	2.06e-21	2.1e-48	7.94e-111	0.000145118	2.34e-10	1.63e-81	2.06e-90	1.22e-34	3.21e-84	3.35e-124	8.26e-23	1.86e-09	4.04e-42	2.03e-08	1.95e-55	5.17e-26	4.08e-25	1.59e-18
F_1yrs_S1C	8.45e-125	2.92e-23	4.62e-43	8.31e-24	3.5e-21	7e-05	5.48e-94	3.37e-23	1.8e-102	4.85e-08	2.17e-21	3.5e-11	1.1e-30	5.37e-22	5.34e-49	1.61e-107	0.000173918	1.21e-09	2.86e-82	1.29e-91	1.21e-34	1.7e-84	1.86e-124	3.13e-23	3.72e-09	4.25e-42	2.29e-08	1.89e-54	2.89e-26	4.05e-25	1.2e-18
F_1yrs_VFC	4.84e-124	8.12e-23	1e-42	1.33e-23	4.79e-21	0.000196419	1.91e-93	1.98e-23	4.69e-103	6.23e-08	1.92e-21	8.46e-11	5.46e-30	1.13e-21	3.95e-49	2.34e-109	0.000238223	2.7e-10	2.24e-81	1.46e-90	2.1e-34	7.06e-85	4.8e-124	7.21e-23	8.1e-10	5.62e-42	3.18e-08	2.57e-55	7.66e-26	1.4e-25	1.36e-18
F_1yrs_CBC	2.83e-117	1.78e-22	2.65e-38	1.14e-21	1.51e-18	1.85e-05	4.14e-86	9.85e-22	7.45e-100	6.03e-06	2.88e-20	3.98e-10	1.86e-29	3.27e-22	2.25e-45	2.41e-99	1.88e-05	1.16e-10	1.92e-75	9.48e-85	1.29e-29	1.28e-75	9.15e-114	2.9e-18	1.06e-08	4.09e-35	3.86e-07	9.05e-65	5.04e-27	8.29e-25	1.89e-18
F_1yrs_A1C	1.07e-122	1.44e-22	5.19e-43	8.6e-24	3.8e-21	8.24e-05	7.11e-94	1.32e-22	8.36e-100	8.5e-08	1.61e-21	9.57e-11	1.55e-29	2.52e-21	1.96e-48	1.35e-108	0.000334642	1.38e-09	5.41e-82	1.59e-90	1.18e-33	3.15e-81	4.25e-123	3.3e-22	7.08e-10	8.35e-42	2.04e-08	2.44e-57	1.46e-25	2.15e-25	2.11e-18
F_1yrs_MD	1.25e-115	2.41e-21	4.89e-37	5.88e-20	5.5e-19	6.9e-05	5.06e-82	4.75e-20	2.12e-100	5.22e-08	1.4e-23	6.1e-10	3.9e-27	1.09e-19	5.73e-49	5.95e-109	2.83e-05	2.53e-09	3.99e-74	2.51e-82	2.11e-30	4.46e-75	2.53e-114	1.26e-18	2.87e-09	8.42e-39	1.11e-07	4.07e-55	5.5e-24	7.3e-25	4.34e-19
F_1yrs_HIP	1.96e-119	4.94e-22	3.16e-39	2.19e-21	9.45e-20	7.88e-05	8.29e-86	2.31e-21	1.57e-102	2.49e-07	1.65e-21	1.6e-10	5.7e-29	2.97e-20	2.92e-48	6.94e-111	0.000153362	2.38e-09	2.04e-78	2.06e-85	3.15e-32	2.89e-77	1.96e-118	7.71e-21	2.45e-09	2.01e-41	7.6e-08	6e-61	3.05e-27	1.08e-24	3.5e-19
F_1yrs_IPC	2.3e-123	3.85e-23	1.77e-42	1.66e-23	6.77e-21	7.51e-05	5.27e-93	9.55e-23	4.8e-102	6e-08	1.48e-21	2.25e-11	3.48e-30	4.51e-21	6e-48	6.02e-109	6.8e-05	3.27e-10	1.66e-81	9.37e-91	2.64e-34	1.18e-84	3.83e-124	3.18e-22	3.92e-10	1.36e-41	2.34e-08	4.75e-52	6.9e-25	2.29e-25	1.34e-18
F_1yrs_STR	7.64e-119	1.28e-21	7.11e-39	1.81e-20	2.46e-20	0.000149373	1.59e-86	1.16e-21	2.61e-98	8.77e-08	1.1e-21	1.53e-10	1.51e-28	3.22e-21	3.66e-45	2.73e-107	1.71e-05	3.14e-09	1.35e-80	3.38e-88	6.59e-33	6.83e-81	3.36e-119	1.4e-21	1.45e-08	8.85e-40	1.15e-07	2.65e-56	6.42e-24	1.2e-22	6.37e-17
F_2yrs_VFC	1.27e-108	5.68e-21	4.22e-29	7.44e-17	4.1e-14	0.000378461	2.53e-63	4.92e-18	4.6e-92	6.95e-07	1.58e-21	7.08e-11	1.42e-28	1.82e-19	8.15e-34	4.38e-91	0.000297614	4.39e-07	1.65e-74	1.3e-78	6.39e-25	1.3e-66	3.38e-103	3.51e-15	7.32e-09	5.67e-31	2.68e-06	3.35e-76	3.22e-35	2.83e-20	4.9e-17
F_2yrs_IPC	2.53e-109	1.46e-20	7.8e-32	3.83e-18	1.44e-15	0.000281267	1.23e-69	1.14e-16	3.86e-88	5.03e-07	3.7e-22	5.92e-10	3.17e-26	6.28e-18	2.3e-33	6.39e-90	0.00029684	9.86e-08	3.78e-74	6.93e-76	8e-25	1.39e-64	2.66e-102	3.71e-15	1.07e-07	9.28e-32	1.22e-05	4.07e-62	5.71e-29	5.44e-20	9.13e-17
F_2yrs_S1C	1.45e-108	1.13e-20	1.27e-30	7.64e-18	1.16e-14	0.000284687	1.57e-65	1.24e-17	1.03e-91	9.67e-07	2.71e-21	1.34e-10	1.1e-28	2.31e-19	6.18e-34	5.32e-90	0.000128326	1.38e-07	2.43e-74	1.15e-78	4.34e-24	4.7e-66	1.68e-102	3.07e-14	1.83e-08	3.93e-31	4.47e-06	2.1e-74	7.95e-35	2.93e-20	5.69e-17
F_2yrs_ITC	4.2e-110	2.34e-20	1.76e-32	2.87e-18	4.34e-16	0.000158082	1.26e-71	3.71e-17	6.15e-90	3.46e-07	6.05e-22	6.12e-11	1.18e-27	4.23e-18	1.06e-33	2.92e-90	0.000761505	3.8e-08	2.25e-74	3.78e-78	1.34e-25	4.02e-65	1.18e-102	3.09e-16	6.57e-09	6.05e-33	1.35e-06	4e-68	5.39e-31	4.51e-20	7.84e-17
F_2yrs_MD	2.54e-107	4.2e-20	1.08e-28	3.26e-17	2.22e-13	0.000106742	5.91e-61	4.25e-17	4.03e-87	2.6e-07	1e-21	8.27e-10	2.16e-25	1.46e-17	1.11e-32	2.42e-88	0.000119725	7.44e-08	2.83e-69	5.99e-73	5.74e-22	1.56e-61	6.89e-98	1.21e-12	5.04e-08	2.59e-27	7.9e-06	5.07e-72	3.3e-32	1.41e-20	1.75e-17
F_2yrs_DFC	1.58e-109	2.41e-21	3.29e-30	5.22e-18	4.15e-14	0.000180294	3.97e-65	8.19e-19	5.24e-91	6.15e-07	3.61e-22	1.45e-11	7.72e-28	8.04e-19	9.76e-36	1.12e-92	7.63e-05	1.47e-07	1.7e-73	1.4e-78	3.32e-26	1.25e-65	1.89e-103	1.55e-15	6.27e-09	9.81e-32	2.8e-06	6.36e-72	3.7e-33	3.89e-21	3.93e-17
F_2yrs_MFC	5.4e-109	3.38e-20	1.02e-32	6.18e-19	1.12e-15	0.000406317	1.27e-70	2.9e-18	4.1e-90	4.8e-07	1.99e-21	1.74e-10	1.69e-26	5.45e-18	2.75e-35	8.12e-91	0.000145393	6.85e-08	5.45e-76	8.29e-79	1.54e-25	5.89e-68	5.02e-105	1.08e-15	1.34e-08	8.01e-33	2.69e-06	3.15e-65	3.81e-33	1.33e-19	1.04e-16
F_2yrs_CBC	1e-113	8.26e-21	5.78e-31	1.98e-18	1.9e-14	5.8e-05	3.39e-69	2.74e-19	4.31e-94	4.04e-06	1.39e-20	1.1e-09	3.74e-29	2.91e-22	1.31e-38	3.22e-96	3.33e-05	5.06e-09	6.66e-78	3.74e-84	2.85e-26	2.21e-69	8.93e-109	8.68e-16	7.63e-09	2.51e-31	1.2e-06	1.38e-65	4.16e-31	2.63e-22	2.94e-17
F_2yrs_HIP	8.77e-105	1.59e-20	2.9e-28	9.82e-17	2.07e-13	0.000670159	9.23e-61	5.67e-17	3.85e-89	7.61e-07	2.02e-21	2.08e-10	1.7e-27	1.75e-18	3.29e-35	1.03e-91	0.000160593	8.17e-07	1.33e-72	9.06e-75	1.75e-23	1.59e-64	4.98e-100	4.38e-14	3.79e-09	8.13e-30	3e-06	3.98e-69	9.31e-33	9.14e-21	3.96e-17
F_2yrs_OFC	8.49e-113	3.32e-21	1.12e-31	6.48e-18	1.23e-15	0.00019624	3.13e-69	6.78e-17	8.41e-94	2.63e-07	8.12e-22	1.63e-10	2.04e-27	1.68e-17	1.24e-36	1.46e-92	5.88e-05	1.36e-07	3.82e-75	8.04e-80	3.32e-27	1.75e-71	2.72e-107	4.81e-17	4.83e-09	1.4e-33	9.56e-07	2.35e-65	1.34e-33	2.68e-21	1.66e-16
F_2yrs_V1C	1.48e-113	1.1e-21	1.38e-31	1.97e-18	4.78e-15	8.5e-05	4.82e-68	5.8e-18	7.69e-93	1.87e-07	2.13e-22	2.15e-11	2.42e-28	8.21e-20	1.71e-36	9.87e-95	7.86e-05	4.56e-08	7.01e-74	7.3e-81	3.11e-25	2.11e-68	1.45e-107	2.49e-15	3.42e-09	3.25e-33	1.57e-06	7.31e-72	3.82e-34	1.41e-20	1.57e-17
F_2yrs_STC	3.53e-111	8.2e-21	3.6e-32	7.37e-19	3.24e-15	0.000261585	1.58e-70	1.32e-19	8.79e-91	1.82e-06	1.78e-21	1.13e-10	9.5e-27	1.66e-18	2.04e-34	5.08e-92	5.29e-05	7.73e-08	3.31e-76	1.17e-78	7.01e-25	2.19e-67	9.45e-104	7.99e-15	1.2e-07	8.56e-32	1.76e-05	3.64e-66	1.6e-31	9.17e-21	8.13e-18
F_3yrs_STR	3.95e-106	1.2e-20	1.02e-30	3.57e-17	2.08e-15	0.000293009	1.05e-67	5.4e-19	5.52e-90	5.05e-07	8.05e-22	1.72e-11	1.1e-28	7.8e-19	7.67e-37	6.19e-93	6.94e-05	2.4e-07	2.72e-75	1.72e-80	3.18e-24	1.69e-67	2.08e-104	2.26e-14	3.06e-07	1.3e-30	1.62e-05	1.82e-72	1.21e-32	2.37e-21	1.37e-17
F_3yrs_STC	8.45e-114	1.12e-22	7.13e-34	2e-19	2.41e-16	1.97e-05	3.34e-73	1.79e-20	7.7e-100	1.33e-07	6.12e-22	2.41e-11	1.49e-29	2.55e-19	1.89e-40	2.59e-99	2.6e-05	7.05e-08	3.3e-77	2.49e-86	8.83e-29	2.34e-75	5.62e-113	5.99e-18	8.56e-09	1.41e-36	1.33e-06	8.97e-71	8.66e-31	3.46e-23	8.63e-18
F_3yrs_IPC	4.16e-113	8.02e-21	2.87e-33	3.75e-19	5.19e-16	0.00024994	8.47e-72	2.09e-20	3.09e-95	1.47e-07	5.41e-21	1.58e-11	2.27e-27	5.64e-19	2.88e-41	7.72e-100	3.01e-05	5.53e-08	7.51e-73	1.09e-82	1.49e-29	3.86e-75	1.15e-111	1.26e-18	9.84e-09	5.69e-36	2.39e-06	4.24e-66	4.84e-28	4.79e-23	8.41e-18
F_3yrs_ITC	3.97e-114	1.14e-21	1.4e-34	7.31e-20	1.27e-16	0.000249895	1.54e-74	1.08e-20	2.92e-95	6.94e-08	2.64e-22	1.18e-11	6.21e-30	1.43e-19	5.73e-41	1.86e-100	1.31e-05	1.34e-07	3.74e-75	8.04e-86	6.05e-29	7.53e-76	1.3e-113	1.99e-18	1.38e-08	1.54e-36	4.24e-06	7.14e-67	3.72e-30	2.14e-22	5.04e-18
F_3yrs_CBC	4.27e-112	1.04e-22	1.99e-35	3.96e-20	3.37e-17	3.43e-05	8.32e-79	5.48e-21	8.54e-91	2e-05	4.8e-22	3.78e-09	4.15e-29	4.12e-20	1.53e-35	4.22e-91	2.61e-05	1.39e-09	6.16e-76	3.66e-82	1.11e-25	3.53e-71	3.99e-109	1.43e-15	9.66e-08	1.1e-31	5.97e-06	6.14e-63	2.86e-28	4e-22	9.25e-17
F_3yrs_AMY	2.23e-110	3.2e-21	3.04e-32	2.55e-18	8.38e-16	0.000138969	1.12e-70	6.15e-20	7.53e-93	5.27e-07	8.74e-21	8.49e-12	1.67e-28	2.11e-18	1.84e-39	3.61e-99	4.28e-05	2.53e-07	1.49e-74	8.12e-80	1.5e-27	5.85e-72	2.07e-109	3e-17	1.71e-08	6.33e-33	3.69e-06	6.22e-72	1.31e-30	8.11e-23	9.44e-19
F_3yrs_VFC	4.82e-112	3.18e-21	9.42e-32	2.53e-18	2.57e-15	0.00026116	1.34e-68	1.24e-20	1.71e-93	1.34e-07	1.22e-20	7.2e-12	7.45e-27	5.38e-19	1.82e-42	1.89e-101	1.34e-05	2.07e-07	2.4e-73	1.75e-82	6.02e-29	4.61e-73	4.65e-111	6.84e-18	2.24e-08	2.13e-35	1.04e-06	3.13e-66	7.76e-28	4.09e-22	8.82e-18
F_3yrs_M1C	1.44e-114	2.94e-21	2.24e-34	9.12e-20	1.64e-16	0.000105147	4.39e-74	3.82e-20	2.95e-95	1.01e-07	3.92e-21	8.5e-12	2.3e-28	4.38e-19	2.1e-42	2.47e-102	1.94e-05	9.07e-08	3.07e-75	3.82e-84	1.56e-29	4.82e-76	2.67e-113	4.53e-18	1.58e-08	9.68e-37	1.63e-06	1.54e-63	8.42e-29	4.1e-23	2.05e-17
F_3yrs_A1C	8.62e-114	5.45e-22	1.38e-32	1.8e-18	5.39e-16	0.000101211	9.92e-71	1.12e-20	1.23e-99	3.74e-07	2.15e-22	3.18e-11	8.18e-30	6.2e-20	2.61e-41	1.25e-100	4.23e-05	3.11e-07	2.6e-76	9.72e-87	1.71e-28	3.89e-74	2.79e-114	1.77e-17	4.91e-09	4.82e-37	7.63e-07	7.78e-72	6.81e-33	1.46e-22	2.21e-17
F_3yrs_MD	1.12e-109	2.26e-21	6.92e-31	2.72e-17	1.85e-15	5.3e-05	4.3e-66	6.18e-19	4.3e-97	1.25e-07	8.43e-23	1.07e-10	2.29e-30	1.98e-18	3.58e-39	1.36e-97	8.34e-05	9.77e-08	2.14e-75	5e-81	3.12e-24	1.14e-69	1.41e-108	5.68e-14	4.88e-08	1.55e-31	8.76e-06	5.14e-75	5.66e-34	9.14e-23	3.08e-18
F_3yrs_V1C	7.21e-115	1.75e-22	4.42e-35	4.37e-20	6.74e-17	0.000242936	9.9e-76	5.7e-20	3.23e-98	7.23e-08	3.36e-22	1.95e-11	4.51e-29	2.69e-20	6.37e-41	3.25e-102	0.000105369	3.32e-08	4.52e-77	3.38e-86	1.21e-28	6.05e-75	5.68e-115	2.05e-17	9.83e-09	2e-37	1.31e-06	6.19e-66	9.37e-30	2.7e-22	3.8e-18
M_3yrs_OFC	1.04e-112	1.24e-21	5.36e-35	5.64e-20	6.37e-17	0.000436756	4.31e-76	2.21e-19	3.16e-93	1.43e-07	1.62e-21	1.65e-11	9.53e-30	8.52e-20	3.73e-40	3.35e-100	0.000194202	2.84e-08	3.33e-79	3.87e-83	4.35e-28	1.5e-69	9.02e-110	1.69e-17	2.34e-08	2.52e-35	6.58e-07	1.3e-64	2.11e-31	8.67e-23	1.16e-17
M_3yrs_MFC	5.58e-112	1.54e-21	1.01e-33	2.1e-19	3.26e-16	0.000145862	1.29e-74	7.33e-20	1.5e-92	1.86e-07	5.79e-21	7.55e-11	2.71e-27	1.19e-19	1.61e-39	4.84e-98	0.000660671	3.63e-08	1.09e-74	3.04e-81	4.68e-27	6e-70	1.13e-107	1.6e-16	1.59e-08	1.14e-33	1.45e-06	1.82e-66	1.26e-31	5.09e-23	7.03e-18
M_3yrs_M1C	1.24e-111	2.93e-21	3.75e-33	1.35e-19	1.76e-15	9.98e-05	5.35e-73	9.09e-19	2.33e-92	5.05e-07	9.94e-21	9.35e-12	2.62e-28	4.89e-18	3.33e-39	8.36e-100	4.9e-05	1.13e-07	1.41e-75	1.26e-82	1.01e-27	3.38e-71	9.02e-108	6.55e-17	2.22e-08	9.59e-34	5.05e-06	4.69e-66	1.26e-31	8.42e-23	7.6e-18
M_3yrs_S1C	6.39e-112	1.5e-22	1.29e-32	2.38e-19	3.43e-15	0.000175703	2.88e-71	2.32e-19	9.87e-93	2.16e-07	2.53e-21	1.31e-11	1.28e-29	2.14e-19	7.17e-37	5.91e-97	9.15e-05	6.72e-08	1.82e-78	6.57e-84	6.19e-27	7.82e-69	6.44e-107	1.81e-16	1.38e-08	2.5e-33	2.51e-06	1.99e-67	3.44e-31	3.26e-22	6.2e-18
M_3yrs_STC	8.23e-113	3.56e-21	5.2e-35	2.78e-20	1.21e-16	0.000303956	1.98e-76	1.59e-19	1.16e-93	1.25e-07	3.95e-20	8.67e-12	1.89e-28	1.99e-19	8.95e-41	1.51e-99	8.02e-05	1.56e-08	6.84e-78	2.66e-82	3.16e-27	3.12e-73	5.1e-109	2.4e-16	9.45e-09	7.37e-35	8.11e-07	3.75e-62	1.04e-28	2.87e-23	2.84e-18
M_3yrs_IPC	5.1e-112	3.93e-23	7.22e-33	2.12e-19	2.18e-15	0.000203707	1.19e-71	7.91e-19	2.97e-93	1.92e-07	3.53e-21	7.03e-12	4.32e-29	9.33e-19	7.84e-37	4.27e-98	0.000374182	6.19e-08	2.53e-76	4.17e-81	3.47e-26	2.93e-68	2.07e-107	1.08e-15	3.13e-08	1.93e-33	8.06e-07	8.59e-66	2.89e-31	7.64e-23	5.35e-18
M_3yrs_A1C	2.53e-111	3.17e-21	6.68e-34	1.93e-19	2.33e-16	0.000352354	3.89e-74	1.07e-19	4.1e-92	2.36e-07	1.53e-20	1.77e-11	4.18e-28	5.77e-18	4.01e-38	1.75e-98	0.000403151	8.96e-08	3.01e-77	3.83e-82	1.88e-27	1.62e-71	1.87e-109	9.88e-17	1.15e-07	8.65e-35	1.57e-06	7.03e-63	1.01e-31	7.1e-23	9.68e-18
M_3yrs_CBC	3.48e-114	5.78e-22	3.34e-36	2.21e-20	1.01e-17	4.03e-05	1.49e-81	1.43e-19	3.46e-90	2.54e-05	8e-20	1.86e-09	1.2e-28	1.23e-21	7.55e-38	5.97e-94	0.000118141	4.07e-10	5.39e-75	3.02e-83	1.49e-27	2.44e-71	3.84e-110	1.14e-16	1.34e-08	1.18e-31	1.13e-06	4.38e-61	6.99e-28	3.14e-23	1.41e-17
M_3yrs_V1C	2.16e-111	1.44e-21	1.08e-33	1.18e-19	5.97e-16	6.03e-05	1.08e-73	4.93e-19	1.81e-90	3.51e-07	5.15e-22	3.12e-11	8.46e-29	2.26e-19	4.02e-38	1.64e-99	0.000570067	2.84e-08	4.67e-77	5.42e-81	1.04e-26	5.18e-67	5.75e-107	2.89e-16	7.62e-08	8.03e-34	5.12e-06	6.98e-62	2.66e-28	6.24e-22	1.37e-17
M_3yrs_AMY	4.41e-111	6.03e-21	6.76e-34	1.27e-19	3.53e-16	0.000168754	1.43e-74	5.27e-20	6.97e-95	1.96e-07	1.69e-20	5.11e-11	2.8e-28	2.62e-19	3.16e-39	5.45e-100	0.000230434	8.22e-08	7.04e-78	1.51e-80	3.15e-26	3.47e-68	2.43e-108	6.77e-16	2.18e-08	3.3e-34	2.85e-06	2.48e-64	2.74e-30	2.7e-22	3.29e-18
M_3yrs_VFC	3.07e-112	1.96e-22	1.21e-32	8.35e-19	9.93e-16	0.000283385	1.34e-70	3.87e-19	7.16e-94	1.94e-07	2.13e-21	2.58e-11	5.52e-30	3.78e-19	1.84e-36	7.89e-98	0.000410899	1.16e-07	5.51e-79	5.85e-82	1.11e-26	7.84e-72	1.67e-108	2.26e-16	2.46e-08	8.78e-34	1.42e-06	1.42e-69	2.02e-32	2.49e-22	1.71e-17
M_3yrs_DFC	3.43e-115	2.74e-22	8.9e-37	9.89e-21	5.99e-18	0.000135016	2.99e-80	8.56e-20	2.1e-97	7.2e-08	9.03e-22	9.55e-12	2.87e-30	4.71e-20	2.01e-41	5.59e-101	0.000146458	1.86e-08	4.81e-80	1.63e-84	2.76e-28	4e-71	1.04e-113	1.13e-17	8.75e-09	3.22e-37	8.19e-07	5.29e-65	8.63e-31	9.01e-23	6.49e-18
M_3yrs_HIP	2.79e-110	8.48e-21	1.99e-32	1.92e-18	7.28e-16	0.000209872	3.46e-71	1.37e-18	6.91e-91	6.52e-07	4.26e-20	1.27e-10	1.7e-28	2.49e-19	2.01e-38	4.84e-95	0.000323364	6.71e-08	8.09e-74	1.09e-75	1.33e-26	2.34e-68	1.8e-106	4.71e-16	6.2e-08	3.38e-32	4.61e-06	1.23e-59	4.68e-29	1.21e-21	9.58e-18
M_3yrs_ITC	2.37e-112	3.57e-21	1.68e-34	3.97e-20	2.72e-16	0.000126958	4.98e-76	2.03e-20	1.55e-91	1.94e-07	1.3e-20	8.61e-11	2.61e-28	1.01e-19	5.74e-39	3.21e-99	0.000609713	2.15e-08	3.46e-78	3.14e-83	1.37e-27	3.01e-68	4.05e-109	4.38e-17	1.12e-08	3.11e-34	5.96e-07	3.46e-62	1.37e-29	6.97e-23	5.08e-18
M_4yrs_AMY	1.14e-107	1.72e-20	3.21e-28	7.91e-17	2.79e-13	0.000369761	1.24e-61	4.32e-19	2.31e-91	1.61e-06	3.24e-21	4.12e-11	2.69e-29	1.8e-18	5.72e-40	1.32e-100	0.000507982	9.7e-07	4.29e-72	2e-81	7.21e-28	1.63e-71	2.08e-106	4.7e-17	8.4e-09	4.48e-34	3.41e-06	4.85e-61	4.9e-27	5.76e-21	2.87e-16
M_4yrs_STR	4.21e-105	6.07e-20	9.77e-29	2.13e-16	3.41e-14	0.000256016	9.48e-62	1.26e-18	8.54e-92	5.97e-07	1.68e-20	5.51e-11	1.43e-28	3.51e-18	6.48e-39	2.69e-97	0.00021297	1.08e-06	8.23e-72	5.23e-81	1.88e-27	2.81e-70	5.17e-107	2.18e-16	1.55e-08	5.71e-33	9.75e-07	2.83e-59	1.1e-24	2.74e-20	5.78e-16
M_4yrs_VFC	1.21e-109	2.33e-20	1.24e-31	2.37e-18	3.6e-15	0.000311082	1.7e-68	1.85e-20	3.82e-91	7.99e-07	1.57e-21	4.13e-12	1.41e-28	2.93e-18	1.01e-42	1.27e-101	4.37e-05	3.58e-08	4.74e-73	2.44e-81	2.83e-29	1.06e-72	4.92e-110	3.02e-18	4.63e-10	6.83e-36	5.72e-07	1.23e-55	1.96e-24	9.68e-23	2.67e-17
M_4yrs_DFC	2.31e-105	1.37e-19	3.01e-27	5.68e-16	3.89e-13	0.000142202	4.9e-59	2.12e-19	1.1e-89	1.72e-06	8.59e-21	4.09e-11	3.06e-28	1.95e-18	6.28e-39	3.31e-97	0.000506626	5.73e-07	1.15e-69	1.68e-79	6.28e-27	2.2e-67	3.2e-105	4.45e-16	2.56e-08	1.71e-33	6e-06	4.45e-65	1.76e-27	4.38e-20	1.59e-15
M_4yrs_STC	2.32e-107	7.49e-19	4.62e-29	4.82e-17	6.76e-14	0.000323409	2.21e-62	2.75e-19	1.18e-89	2.02e-06	1.31e-19	1.41e-11	1.82e-26	1.37e-17	2.23e-41	1.78e-98	4.32e-05	7.86e-07	6.36e-70	9.96e-80	1.46e-28	1.72e-69	6.71e-106	1.71e-17	5.11e-09	6.56e-34	5.01e-07	4.58e-59	3.09e-24	2.29e-21	4.19e-16
M_4yrs_CBC	4.1e-103	4.45e-20	1.23e-27	1.18e-16	7.04e-13	5.62e-05	1.74e-60	1.09e-17	5.99e-90	1.49e-05	1.81e-20	2.54e-09	1.18e-28	2.52e-18	3.94e-37	4.07e-92	0.00014636	9.97e-08	9.73e-68	8.41e-78	1.08e-24	4.11e-64	8.49e-102	4.43e-14	4.39e-08	4.61e-29	8.19e-07	6.57e-65	4.17e-28	1.62e-21	3.76e-16
M_4yrs_MD	1.68e-107	8.64e-20	1.01e-29	5.55e-17	1.32e-14	9.92e-05	8.6e-64	1.48e-18	1.65e-95	1.94e-07	8.12e-23	5.97e-11	3.2e-27	1.94e-17	5.82e-44	1.12e-102	9.35e-05	3.49e-08	7.87e-69	2.69e-78	1.01e-26	1.28e-70	1.54e-106	9.31e-16	3.75e-09	4.37e-33	2.91e-07	5.91e-60	1.48e-25	1.12e-22	1.28e-17
M_8yrs_ITC	6e-107	1.3e-18	4.59e-30	4.17e-18	7.01e-14	0.000293859	2.37e-64	1.06e-19	5.04e-91	6.76e-07	5.42e-20	5.78e-12	5.06e-27	2e-17	2.29e-41	2.27e-97	1.98e-05	1.26e-07	1.66e-69	7.39e-77	5.22e-27	5.58e-71	2.41e-106	3.6e-16	4.41e-09	2.16e-35	2.71e-07	4.26e-57	8.44e-26	3.27e-22	2.18e-17
M_8yrs_S1C	5.08e-107	1.73e-19	3.37e-28	4.08e-17	5.37e-13	0.000323936	1.96e-59	1.25e-18	1.38e-89	8.11e-07	1.96e-21	1.43e-11	9.28e-29	1.23e-18	1.36e-41	1.22e-94	4.03e-05	3.56e-07	9.45e-70	6.96e-79	3.16e-28	2.25e-72	4.02e-106	5.62e-17	1.23e-08	5.91e-35	1.63e-06	2.51e-63	7.22e-28	3.69e-21	1.44e-16
M_8yrs_IPC	7.42e-108	5.72e-21	4.67e-29	1.16e-17	2.53e-13	0.000500204	2.71e-61	1.88e-17	1.22e-92	5.97e-07	5.06e-21	2.65e-12	3.11e-28	4.27e-21	4.3e-42	2.51e-97	6.57e-05	1.93e-07	3.28e-69	6.62e-79	2.01e-29	1.3e-71	4.01e-107	7.58e-18	2.87e-09	1.8e-35	1.17e-06	4.53e-61	2.16e-27	2.66e-22	1.16e-17
M_8yrs_V1C	3.3e-110	2e-20	9.15e-32	3.82e-19	1.46e-14	0.000252762	1.31e-66	9.45e-20	1.02e-93	3.38e-07	1.54e-21	3.08e-12	8.41e-28	3.87e-19	5.82e-42	5.5e-101	4.64e-05	3.66e-08	3.5e-73	9.63e-82	2.12e-29	3.45e-76	1.2e-111	9.41e-18	3.49e-09	2.74e-37	2.7e-07	6.12e-62	5.67e-27	3.8e-23	7.66e-18
M_8yrs_STC	4.43e-107	6.93e-19	5.13e-30	3.64e-18	8.83e-14	0.000107721	3.97e-64	9.95e-20	2.27e-90	4.51e-07	1.59e-20	9.28e-12	6.11e-28	3.42e-18	4.16e-42	3.59e-100	9.74e-05	1.36e-07	1.86e-70	5.76e-79	1.42e-28	2.65e-73	1.47e-108	2.94e-17	5.24e-09	4.72e-36	2.79e-07	5.91e-62	1.67e-26	9.86e-22	2.78e-17
M_8yrs_MD	1.86e-110	2.63e-20	2.39e-33	1.47e-18	1.14e-16	4.8e-05	1.93e-73	1.11e-19	6.62e-99	1.14e-07	6.61e-22	8.06e-10	2.69e-28	4.65e-19	1.33e-46	1.18e-106	5.58e-05	2.92e-09	2.76e-69	1.6e-77	2.15e-27	1.1e-71	3.32e-110	2.83e-16	1.47e-08	7.76e-37	5.78e-07	7.9e-63	4.14e-28	3.48e-23	1.11e-18
M_8yrs_VFC	3.06e-107	3.79e-19	2.6e-30	5.86e-18	2.96e-14	0.000567174	3.25e-65	2.22e-19	5.41e-94	6.09e-07	6.4e-21	4.37e-12	6.61e-29	9.64e-21	6.46e-42	7.36e-98	6.69e-05	5.28e-08	1.09e-69	1.39e-79	6.65e-28	7.29e-74	4.96e-110	5.38e-17	6.85e-09	3.39e-36	5.02e-07	6.55e-62	5.88e-27	5.29e-21	3.79e-17
M_8yrs_HIP	2.71e-112	1.91e-20	2.73e-34	2.33e-19	8.06e-17	0.000121619	8.93e-75	5.77e-20	4.89e-99	4.51e-07	1.45e-20	9.48e-11	1.42e-30	2.96e-20	2.55e-43	1.96e-103	2.14e-05	9.66e-09	8.01e-75	6.07e-81	1.35e-29	7.76e-75	1.36e-115	2.4e-18	3.68e-08	1.12e-38	4.06e-07	1.74e-61	8.58e-28	1.23e-23	3.48e-18
M_8yrs_AMY	7.79e-111	1.61e-19	2.35e-32	5.48e-19	2.83e-15	0.000388876	8.79e-72	1.79e-19	6.28e-93	3.73e-07	2.34e-20	2.97e-11	1.65e-27	7.35e-19	5.61e-43	6.2e-103	3.25e-05	2.45e-08	6.51e-73	8.54e-81	3.71e-28	3.34e-74	2.75e-112	7.1e-17	3.25e-08	8.93e-37	5.69e-07	2.76e-65	7.46e-29	2.48e-23	9.43e-19
M_8yrs_M1C	3.2e-105	4.37e-19	4.43e-28	5.69e-17	5.15e-13	0.000142612	2.25e-60	4.48e-19	2.48e-91	3.69e-06	9.08e-20	3.78e-11	1.07e-27	2.43e-19	1.14e-40	6.08e-95	4.38e-05	1.77e-07	1.22e-68	8.35e-78	3.31e-27	7.9e-68	7.01e-105	3.1e-16	1.12e-09	1.03e-34	4.19e-07	5.84e-65	2.47e-29	9.61e-22	2.35e-17
M_8yrs_CBC	7.87e-111	4.93e-23	6.9e-30	1.8e-17	2.68e-14	5.17e-05	2.28e-66	1.56e-20	8.81e-99	5.55e-06	1.99e-21	8.5e-10	8.91e-31	8.49e-22	5.86e-40	1.68e-98	7e-05	4.35e-08	2.46e-70	8.67e-83	2.78e-25	4.01e-69	1.5e-107	2.42e-14	2.39e-08	3.32e-32	3.87e-06	7.58e-70	7.75e-32	4.57e-21	1.36e-16
M_8yrs_DFC	3.7e-109	1.29e-20	1.32e-32	4.06e-19	2.14e-15	0.000396638	5.76e-71	7.77e-20	6.17e-93	3.46e-07	3.69e-21	1.52e-11	2.5e-28	4.25e-20	4.22e-42	2.29e-98	0.000141277	1.8e-08	1.22e-73	4.45e-81	1.93e-28	3.2e-73	2.31e-109	1.51e-17	2.35e-08	9.76e-38	1.82e-07	1.42e-63	1.98e-28	1.14e-22	6.99e-18
M_8yrs_STR	3.05e-103	2.76e-20	5.76e-28	5.03e-16	8.58e-14	0.000444435	4.8e-61	2.58e-18	1.01e-91	4.1e-07	1.87e-21	5.08e-11	2.13e-27	2.09e-17	4.03e-39	3.53e-95	4.08e-05	2.1e-07	1.94e-70	7.08e-78	1.28e-26	7.9e-70	7.26e-105	1.17e-15	6.34e-08	5.56e-34	6.97e-07	1.22e-64	3.05e-27	1.06e-20	1.96e-16
M_8yrs_A1C	1.58e-108	8.7e-21	5.05e-30	3e-18	1.04e-13	0.000162176	5.82e-64	8.77e-20	8.22e-95	4.47e-07	2.31e-21	4.54e-11	3.79e-28	6.92e-20	6.3e-43	6.4e-100	7.68e-05	5.26e-08	6.75e-73	1.11e-80	1.28e-28	5.21e-76	3.42e-110	2.49e-17	4.32e-09	1.62e-36	3.11e-07	6.32e-63	3.45e-27	5.61e-22	4.49e-17
M_8yrs_MFC	5.55e-107	4.54e-20	9.38e-29	1.01e-17	5.57e-13	0.000438768	6e-62	2.62e-18	5.98e-92	7.56e-07	1.24e-20	2.79e-12	1.04e-27	1.41e-19	7.2e-42	6.38e-102	2.36e-05	1.74e-07	4.35e-71	8.61e-80	8.41e-27	6.63e-70	2.34e-107	4.61e-16	3.9e-10	8.3e-35	3.97e-07	4.93e-64	3.39e-29	3.34e-22	3.51e-17
M_8yrs_OFC	9.51e-113	3.34e-20	3.01e-33	1.25e-19	1.53e-15	0.000125266	2.8e-72	2.85e-19	1.45e-95	2.33e-07	6.04e-21	2.8e-12	3.5e-29	1.23e-21	1.88e-44	2.63e-103	6.54e-05	1.31e-08	4.83e-74	9.01e-83	5.53e-29	3.35e-73	2.24e-112	7.68e-18	3.12e-09	4.21e-38	2.62e-07	6.1e-65	3.88e-28	5.18e-23	6.47e-18
M_8yrs_MFC.1	2.81e-96	2.56e-18	1.25e-31	2.18e-18	3.91e-15	0.000464026	9.55e-70	7.13e-16	2.16e-77	2.6e-06	3.25e-18	2.7e-11	4.3e-23	1.06e-17	5.87e-38	2.64e-90	0.000502273	6.36e-08	5.93e-61	4.34e-70	2.67e-29	1.43e-67	5.41e-96	2.57e-19	4.07e-08	3.24e-36	1.5e-06	2.06e-43	3.54e-19	1.44e-20	4.2e-15
M_8yrs_CBC.1	1.53e-123	7.46e-23	1.51e-40	1.74e-22	5.6e-20	8.53e-06	8.1e-91	7.02e-22	2.9e-103	3.11e-06	2.48e-21	7.4e-11	2.3e-31	1.4e-22	1.22e-44	2.96e-106	0.000141926	3.07e-10	4.06e-81	6.24e-92	9.28e-30	5.73e-77	2.07e-117	8.55e-19	3.05e-10	9.18e-37	1.74e-07	4.95e-67	9.23e-31	1.44e-25	8.34e-19
M_8yrs_A1C.1	7.6e-124	7.25e-23	1.3e-43	2.95e-24	2.74e-21	0.000149078	4.47e-96	6.25e-23	4e-106	4.67e-08	1.35e-21	7.6e-12	8.71e-31	6e-22	2.84e-49	1.38e-112	0.000373505	2.85e-09	5.84e-86	1.87e-94	3.37e-34	2.19e-79	1.52e-124	2.46e-22	5.47e-10	9.11e-45	1.69e-08	3.73e-60	5.88e-28	1.82e-26	1.34e-19
M_8yrs_VFC.1	6e-123	7.69e-22	2.04e-40	1e-22	1.29e-19	5.48e-05	1.68e-90	5.19e-22	1.07e-101	3.17e-07	1.57e-21	1.8e-12	1.83e-30	1.24e-19	1.85e-48	4.59e-113	0.000117061	1.4e-09	9.42e-83	2.75e-93	7.57e-34	2.37e-84	6.95e-125	2.9e-22	3.4e-10	5.95e-44	1.02e-07	2.22e-56	5.75e-27	4.96e-25	9.29e-19
M_8yrs_HIP.1	1.19e-113	1.44e-20	1.29e-35	4.87e-20	1.79e-17	0.00019741	9.75e-80	3.05e-21	2.13e-96	4.34e-07	7.47e-20	3.6e-11	6.59e-28	7.29e-20	1.69e-46	2.38e-107	0.000120571	2.16e-08	8.98e-78	5.94e-83	6.49e-31	1.76e-76	4.54e-115	1.45e-19	2.52e-09	1.01e-39	1.85e-07	2.7e-58	1.48e-26	9.23e-24	1.16e-17
M_8yrs_AMY.1	8.91e-123	1.46e-21	1.14e-39	2.95e-22	2.49e-19	9.84e-05	9.99e-89	3.4e-22	3.69e-103	6.22e-08	6.98e-22	2.5e-12	2.39e-31	2.58e-21	5.9e-47	3.83e-113	0.000223629	5.86e-09	1.51e-84	6.87e-94	2.62e-33	7.09e-81	1.27e-122	2.72e-21	5.87e-10	5.02e-43	4.47e-08	4.89e-58	2.26e-27	9.04e-25	2.25e-18
M_8yrs_V1C.1	3.07e-127	8.58e-23	5.98e-44	2.66e-24	1.4e-21	2.11e-05	7.48e-96	1.37e-23	4.32e-105	4.46e-07	5.53e-22	2.79e-12	2.91e-30	2.52e-22	1.46e-51	1.97e-112	0.000168516	6.85e-11	1.32e-83	3.1e-94	5.39e-35	6.58e-79	1.08e-124	1.42e-22	1.09e-10	3.06e-44	1.01e-08	1.17e-61	5.6e-29	1.23e-25	3.46e-19
M_8yrs_IPC.1	5.14e-123	3.23e-21	1.08e-41	1.69e-23	3.99e-20	3.64e-05	6.32e-92	4.81e-22	1.04e-100	4.73e-08	4.68e-21	2.47e-12	2.29e-29	3.99e-21	6.56e-49	2.99e-112	0.000130814	1.18e-09	1.69e-83	4.12e-91	1.52e-33	1.89e-79	4.47e-122	3.87e-21	1.98e-10	7.93e-44	3.5e-08	2.41e-58	1.65e-26	2.56e-26	2.86e-19
M_8yrs_DFC.1	3.04e-105	2.77e-19	2.55e-35	4.65e-20	3.68e-17	0.000257127	1.24e-77	1.12e-17	4.57e-84	3.84e-07	7.73e-20	1.55e-11	3.62e-24	5.16e-18	1.51e-41	5.83e-93	0.000712111	8.63e-09	6.67e-68	2.55e-75	2.03e-29	2.41e-68	6.6e-101	5.51e-19	1.96e-08	1.61e-38	2.49e-07	2.08e-51	7.1e-24	1.04e-21	1.89e-16
M_8yrs_STC.1	5.11e-126	6.12e-23	1.39e-43	1.88e-24	4.56e-21	5.76e-05	1.11e-96	1.8e-22	4.16e-105	4.83e-08	2.62e-22	7.16e-12	6.28e-31	5.56e-21	6.09e-49	1.15e-113	0.000199886	3.99e-10	7.64e-84	3.05e-93	9.56e-37	1.35e-85	1.05e-128	1.53e-24	1.34e-11	5.41e-45	2.6e-08	5.9e-60	9.15e-29	1.85e-25	5.42e-19
M_8yrs_ITC.1	7.73e-121	4.06e-21	1.31e-42	6.25e-24	1.3e-20	0.000136795	1.37e-94	1.16e-22	1.04e-102	1.91e-07	1e-19	3.56e-13	2.39e-27	1.12e-19	1.09e-49	5.84e-114	4.11e-05	9.29e-10	2.48e-79	2.28e-89	3.94e-35	2.25e-82	1.95e-123	1.19e-22	9.9e-11	5.67e-43	1.32e-08	1.98e-53	3.21e-23	5.74e-27	9.37e-19
F_11yrs_VFC	2.39e-120	8.03e-21	2.04e-38	2.28e-21	5.91e-19	0.000155337	2.95e-83	4.36e-20	3.02e-98	1.44e-07	4.01e-22	1.97e-11	5.03e-29	5.51e-21	1.09e-43	1.36e-105	0.000173256	2.73e-09	5.32e-81	2.22e-89	8.41e-33	1.56e-80	4.16e-122	8.09e-21	7.75e-09	2.41e-41	3.33e-07	3.6e-53	5.46e-24	5.75e-24	7.23e-18
F_11yrs_IPC	3e-112	2.9e-20	2.48e-36	2.61e-20	6.41e-18	0.000283878	5.63e-79	2.46e-19	5.52e-92	2.43e-07	3.66e-20	4.93e-11	5.97e-27	2.16e-20	4.12e-44	1.47e-100	5.94e-05	1.34e-09	6.88e-71	3.7e-81	5.1e-31	6.42e-74	3.49e-111	3.23e-20	1.18e-08	4.04e-39	1.87e-07	9.89e-51	1.51e-21	2.69e-23	2.49e-17
F_11yrs_ITC	5.28e-111	5.96e-19	7.36e-34	1.96e-19	2.54e-16	0.000221977	2.1e-73	3.18e-21	1.41e-91	2.94e-07	1.27e-19	2.08e-12	8.52e-26	2.41e-18	4.21e-45	1e-107	6.71e-05	3.32e-08	3.53e-72	5.26e-78	1.74e-32	3.08e-75	5.16e-112	7.87e-20	1.5e-08	1.69e-38	1.1e-06	8.86e-50	6.08e-20	1.62e-23	1.21e-17
F_11yrs_STC	4.59e-116	3.84e-21	8.42e-36	2.1e-20	2.66e-17	0.000261793	2.81e-77	1.55e-19	1.73e-94	1.29e-07	4.43e-21	2.75e-12	5.64e-28	5.32e-20	2.05e-45	6.61e-106	9.34e-05	3.45e-08	2.48e-75	7.52e-83	1.63e-31	3.95e-77	1.77e-116	7.65e-20	5.61e-09	5.18e-40	5.54e-07	3.74e-52	1.81e-23	2.07e-24	4.59e-18
F_11yrs_S1C	1.19e-116	3.86e-20	5.21e-38	3.75e-21	9.2e-19	0.000230255	6.04e-83	1.7e-21	3.25e-95	1.53e-07	3.41e-20	2.32e-11	7.9e-28	1.9e-19	1.08e-46	5.69e-107	0.000146744	7.54e-09	4.62e-78	3.71e-84	3.43e-33	1.37e-82	4.74e-119	5.5e-21	6.78e-09	8.78e-41	2.63e-07	9.14e-50	3.48e-21	1.67e-24	9.38e-18
F_11yrs_DFC	4.45e-120	1.07e-21	5.81e-39	1.29e-21	2.96e-19	6.8e-05	4.96e-85	3.53e-22	3.04e-97	1.24e-07	6.79e-22	2.6e-11	5.29e-30	1.64e-20	1.98e-43	4.35e-106	0.000179925	3.8e-09	1.94e-79	1.33e-87	7.88e-32	1.03e-82	2.12e-121	8.16e-21	4.87e-09	1.58e-41	7.42e-07	5.34e-52	8.37e-23	8.23e-24	1.24e-17
F_11yrs_AMY	1.3e-116	1.27e-20	8.82e-36	4.6e-20	1.3e-17	0.000318387	3.54e-80	8.27e-21	1.65e-94	1.03e-06	2.33e-21	6.93e-11	8.49e-29	2.23e-20	1.34e-43	1.45e-106	0.000224704	2.39e-09	1.73e-79	8.23e-82	1.94e-30	6.23e-77	6.46e-116	1.44e-19	1.72e-08	7.69e-39	5.05e-07	4.76e-50	2.74e-24	1.33e-23	3.43e-18
F_11yrs_V1C	1.86e-119	8.21e-22	3.33e-39	4.95e-22	4.35e-19	0.00011674	3.17e-84	2.13e-21	3.69e-94	1.53e-07	1.88e-21	1.24e-10	1.41e-29	4.64e-21	1.04e-44	7.03e-103	0.000733296	3.17e-09	2.36e-78	6.56e-87	3e-31	2.52e-78	1.96e-118	1.61e-19	1.99e-08	1.38e-40	2.98e-07	4.88e-53	5.81e-24	1e-23	7.23e-18
F_11yrs_CBC	4.62e-117	1.63e-21	1.76e-37	1.07e-20	1.1e-18	3.44e-05	3.84e-86	2.98e-18	2.17e-93	4.27e-05	3.04e-20	1.69e-09	1.03e-27	7.95e-21	5.76e-41	5.86e-99	0.00168721	5.73e-11	2.42e-71	7.92e-81	1.44e-29	2.01e-72	1.88e-109	5.48e-18	4.18e-08	5.48e-34	2.79e-06	6.34e-52	4.93e-22	2.71e-23	1.36e-17
F_11yrs_A1C	6e-121	6.42e-21	2.25e-41	7.16e-23	2.01e-20	8.23e-05	1.71e-89	1.01e-20	7.38e-99	1.97e-07	1.2e-20	4.69e-11	2.11e-28	2.31e-21	7.18e-48	5.4e-108	0.000148725	5.92e-10	3.63e-78	2.62e-86	3.08e-33	1.81e-81	3.85e-121	3.55e-21	1.93e-08	7.26e-42	1.16e-07	1.59e-48	2.39e-22	5.45e-25	2.57e-18
F_11yrs_HIP	9.69e-110	2.33e-19	3.16e-29	1.05e-16	2.21e-14	0.000283707	6.07e-65	9.14e-21	2.45e-93	3.64e-07	2.98e-21	7.04e-12	9.97e-27	1.15e-17	9.74e-45	4.14e-106	2.78e-05	1.94e-07	4.37e-73	2.66e-80	7.11e-31	2.29e-75	1.83e-110	2.42e-19	1.7e-09	3.98e-36	5.8e-07	5.4e-53	4.38e-22	1.46e-23	1.54e-17
F_11yrs_M1C	7.13e-118	1.1e-21	1.83e-37	6.76e-21	1.8e-18	0.000214365	1.11e-81	5e-21	1.28e-95	1.4e-07	7.29e-22	9.11e-11	1.89e-30	2.85e-20	1.8e-44	9.41e-105	0.000187051	1.7e-08	7.08e-80	6.26e-87	2.08e-32	2.76e-81	1.71e-119	9.87e-21	1.06e-08	5.78e-41	5.32e-07	1.7e-54	1.92e-24	7.47e-24	6.74e-18
F_11yrs_OFC	1.66e-117	3.2e-20	7.52e-38	6.17e-21	8.11e-19	0.00025489	5.99e-83	6.16e-20	1.17e-94	1.19e-07	2.52e-20	1.86e-11	3.6e-29	2.88e-20	1e-44	1.52e-103	4.16e-05	1.18e-09	2.56e-79	3.53e-86	1.18e-32	3.27e-78	4.72e-118	1.51e-20	2.01e-08	1.49e-40	8.02e-07	1.16e-50	1.67e-22	6.65e-24	9.51e-18
F_11yrs_MFC	2.16e-117	1.05e-20	1.81e-38	2.76e-21	4.34e-19	0.000210178	1.95e-84	2.17e-20	4.59e-94	1.61e-07	1.75e-21	5.26e-11	4.64e-29	5.7e-20	2.44e-44	3.95e-108	0.000154569	8.07e-09	3.75e-80	4.7e-86	2.14e-32	1.64e-80	5.64e-119	9.06e-21	6.34e-09	5.29e-41	4.44e-07	1.04e-51	3.01e-23	1.7e-23	7.48e-18
F_13yrs_MFC	3.59e-115	2.02e-21	9.66e-37	1.1e-20	5.87e-18	0.00040002	2.08e-80	2.49e-20	1.97e-93	3.14e-07	2.12e-22	3.41e-11	4.93e-29	1.19e-18	5.22e-42	2.8e-104	0.000249187	3.01e-08	7.95e-82	1.55e-87	3.41e-30	1.67e-76	1.19e-116	2.74e-19	2.1e-08	5.44e-40	4.19e-07	1.17e-55	6.67e-27	4.06e-24	1.93e-18
F_13yrs_IPC	6.29e-117	9.98e-22	3.6e-38	1.56e-21	1.51e-18	7.82e-05	8.34e-83	1.09e-20	1.4e-95	1.27e-07	4.48e-22	2.38e-11	2.49e-31	3.3e-20	6.53e-41	2.94e-102	0.000457008	3.45e-09	8.03e-83	7.23e-89	5.74e-30	9.8e-80	2.02e-118	1.76e-19	8.15e-09	2.26e-41	2.07e-07	1.88e-61	1.62e-28	1.59e-23	3.95e-18
F_13yrs_VFC	1.53e-114	1.77e-21	4.71e-38	2.37e-21	1.31e-18	0.0003331	2.24e-83	1.55e-21	6.98e-95	1.8e-07	2.04e-22	2.96e-11	3.11e-29	4.19e-21	1.08e-43	3.55e-104	9.66e-05	4.88e-09	1.09e-79	2.9e-86	3.76e-31	1.1e-78	1.36e-117	4.47e-20	3.85e-08	3.83e-41	3.8e-07	2.13e-56	1.97e-26	1.74e-23	2.84e-18
F_13yrs_A1C	1.32e-117	2.71e-21	6.56e-39	7.04e-22	6.05e-19	0.000385211	1.6e-84	9.49e-20	2.28e-94	3.33e-07	9.02e-22	7.18e-11	3.16e-29	2.45e-20	4.22e-43	1.3e-101	0.000267155	1.82e-09	3.04e-80	9.95e-86	7.99e-31	4.02e-78	1.05e-117	1.38e-19	1.26e-08	4.08e-41	2.41e-07	2.71e-58	2.43e-25	4.56e-24	3.63e-18
F_13yrs_ITC	1.9e-116	6.02e-22	3.94e-38	2.94e-21	8.86e-19	0.000134873	1.73e-83	6.18e-21	5.12e-96	1.25e-07	4.23e-23	3.87e-11	2.5e-30	1.46e-20	6.02e-42	3.01e-101	0.000267088	1.66e-08	4.23e-81	4.41e-89	4.38e-31	4.56e-79	1.1e-119	1.98e-20	3.14e-08	6.71e-42	8.68e-07	2.12e-61	6.15e-28	4.79e-23	3.1e-18
F_13yrs_STC	2.44e-116	7.72e-22	2.98e-38	1.66e-21	1.18e-18	0.000204824	1.94e-83	1.85e-21	1.77e-97	2.13e-07	1.33e-23	1.49e-11	1.71e-31	2.03e-21	6.84e-43	2.46e-103	0.000168024	8.48e-09	3.56e-81	3.64e-89	3.99e-30	1.3e-78	1.27e-119	2.86e-19	1.33e-08	1.39e-41	3.06e-07	1.05e-61	1.47e-27	7.69e-24	1.84e-18
F_13yrs_CBC	5.33e-115	1.54e-22	6.62e-36	4.69e-20	9.58e-18	3.64e-05	2.77e-80	3.36e-19	3.51e-90	8.97e-06	5.46e-21	4.41e-09	2.69e-28	6.8e-20	1.47e-39	2.97e-98	1.62e-05	2.89e-10	4.17e-73	2.09e-83	1.64e-28	1.64e-73	3.96e-112	1.76e-17	2.93e-08	1.05e-33	1.05e-06	4.12e-57	7.29e-26	5.59e-23	7.98e-18
F_13yrs_V1C	1.08e-114	2.53e-22	1.59e-36	8.85e-21	1.18e-17	0.000514994	6.32e-79	6.75e-20	5.33e-92	2.04e-07	8.79e-23	3.11e-11	2.11e-30	2.95e-20	7.12e-41	2.54e-99	0.000333978	8.35e-09	1.26e-80	5.79e-85	1.68e-28	8.05e-74	1.7e-114	1.44e-17	5.67e-08	1.36e-39	1.1e-06	1.49e-58	1.41e-27	1.24e-22	1.02e-17
F_13yrs_S1C	1.58e-116	1.9e-21	2.28e-38	1.13e-21	1.31e-18	0.000240213	4.87e-83	9.42e-20	7.96e-96	2.11e-07	8.28e-23	3.08e-11	3.26e-30	2.91e-21	7.45e-44	3.79e-105	5.55e-05	3.83e-09	2.69e-81	8.34e-87	4.61e-31	2.41e-77	5.22e-116	3.51e-20	4.11e-09	1.28e-41	1.23e-07	2.19e-60	8.47e-28	1.56e-23	3.63e-18
F_13yrs_DFC	3.68e-119	1.36e-21	3.44e-39	3.76e-22	5.86e-19	0.000273702	2.06e-84	2.35e-21	2.58e-96	1.04e-07	2.25e-22	4.73e-11	1.55e-30	5.22e-21	1.66e-44	6.69e-104	7.24e-05	1.39e-08	1.4e-83	2.15e-89	1.47e-31	6.3e-79	5.53e-120	1.21e-20	2.5e-09	9.35e-42	6.87e-08	5.17e-60	8.72e-28	2.03e-24	2.85e-18
F_13yrs_OFC	3.06e-117	4.13e-22	4.04e-38	1.85e-21	1.43e-18	0.00033289	8.27e-83	3.13e-20	1.38e-96	1.51e-07	1.97e-23	7.01e-11	5.22e-31	8.05e-20	1.44e-42	1.59e-101	0.000130562	3.63e-09	1.87e-81	2.71e-87	1.5e-30	2.59e-80	1.42e-118	6.11e-20	2.05e-08	4.78e-41	2.22e-07	2e-58	1.22e-27	1.82e-23	4.95e-18
F_13yrs_MD	1.27e-108	4.1e-22	7.68e-32	6.53e-18	8.4e-16	0.000223075	6.93e-69	7.15e-19	1.26e-91	4.84e-08	5.19e-23	2.71e-11	2.81e-28	8.75e-18	5.67e-37	7.5e-98	0.000153653	2.48e-08	6.6e-77	1.94e-82	9.38e-25	2.17e-66	4.4e-105	2.86e-15	8.61e-09	8.62e-35	2.71e-06	2.67e-71	2.59e-34	3.36e-23	1.42e-18
F_13yrs_AMY	8.69e-113	2.08e-21	5.15e-36	2.38e-20	1.45e-17	0.0006673	1.94e-79	1.4e-21	3.92e-90	2.81e-07	7.42e-23	8.71e-11	1.3e-28	5.18e-18	3.33e-40	8.86e-103	0.000181845	4.18e-08	3.91e-81	3.08e-85	5.64e-29	1.82e-74	3.96e-113	2.16e-18	2.16e-08	1.68e-39	1.02e-06	1.04e-54	2.1e-27	5.2e-23	2.23e-18
F_13yrs_M1C	1.28e-118	3.46e-21	4.59e-39	4.45e-22	6.63e-19	0.000121242	3.89e-85	8.03e-21	7.99e-97	1.55e-07	4.53e-22	5.18e-11	1.77e-30	9.65e-20	1.87e-45	3.25e-105	0.000195415	9.47e-09	3.3e-80	3.95e-88	1.57e-31	1.6e-78	2.14e-119	2.23e-20	2.98e-09	5.32e-42	1.51e-07	4.49e-56	8.91e-26	3.83e-24	1.81e-18
F_13yrs_HIP	1.2e-109	1.13e-20	1.49e-33	9.21e-19	1.13e-16	0.000319937	1.34e-74	5.09e-20	5.09e-90	5.05e-07	2.52e-21	5.74e-11	4.27e-29	1.84e-17	1.48e-38	4e-99	0.000467944	6.24e-08	9.2e-77	1.48e-82	2.17e-28	2.79e-72	1.13e-110	3.46e-18	7.5e-08	1.85e-37	8.78e-07	1.33e-59	9.56e-29	1.14e-22	6.19e-18
F_13yrs_STR	4.93e-110	3.3e-21	8.55e-34	8.17e-18	6.91e-18	0.000421437	2.25e-75	2.16e-19	1.29e-91	3.95e-07	4.25e-22	2.58e-10	1.82e-27	1.31e-18	7.07e-39	3.25e-99	2.12e-05	1.73e-08	5.09e-79	1.66e-83	4.2e-28	1.14e-71	3.21e-111	1.41e-17	1.4e-07	1.23e-36	2.71e-06	6.18e-59	3.25e-27	6.36e-22	2.47e-17
M_15yrs_IPC	1.47e-117	1.53e-20	6.89e-42	2.02e-23	2.15e-20	0.000173512	1.46e-90	1.83e-21	3.85e-93	1.06e-07	1.67e-20	5.93e-11	3.73e-28	1.01e-19	4.23e-47	5.38e-106	7.29e-05	1.49e-09	1.26e-77	1.55e-84	1.09e-33	4.1e-80	8.48e-119	1.08e-21	4.13e-09	8.48e-42	4.62e-08	2.99e-49	1.21e-22	9e-25	1.79e-18
M_15yrs_CBC	2.21e-111	1.02e-20	6.06e-35	1.56e-19	2.67e-17	5.68e-05	7.42e-79	1.49e-20	1.1e-93	2.06e-05	3.62e-20	6.05e-09	1.93e-28	2.77e-21	1.5e-41	5.46e-98	6e-05	4.77e-10	6.09e-73	7.07e-82	4.51e-28	1.52e-72	1.43e-109	7.52e-17	3.21e-08	4.66e-33	1.84e-06	2.35e-65	2.04e-27	2.02e-23	1.1e-17
M_15yrs_STC	1.23e-117	3.77e-20	6.58e-41	4.8e-23	8.67e-20	0.000161003	4.15e-88	1.96e-21	8.22e-99	1.55e-07	9.61e-21	8.09e-11	4.34e-28	7.49e-21	7.36e-49	1.66e-106	0.000123485	1.14e-09	2.58e-78	6.42e-85	2.47e-33	5.03e-78	7.94e-118	4.74e-21	4.02e-09	2.18e-41	4.35e-08	1.6e-50	2.45e-22	9.04e-25	1.12e-18
M_15yrs_ITC	6.48e-118	2.57e-21	6.25e-41	8.57e-23	4.66e-20	0.000116872	7.07e-89	2.84e-22	6.64e-96	1.71e-07	4.86e-21	1.36e-10	5.67e-28	2.65e-19	7.11e-46	4.09e-106	0.000326004	2.18e-09	3.22e-78	1.2e-84	1.33e-32	9.13e-79	1.13e-117	9.59e-21	1.38e-08	2.38e-41	6.67e-08	1.07e-50	4.97e-24	1.97e-24	3.47e-18
M_15yrs_AMY	1.56e-118	4.14e-20	1.02e-39	3.86e-22	1.72e-19	0.000308508	2.73e-88	6.74e-22	9.93e-96	1.88e-07	5.1e-21	3.72e-11	1.8e-27	7.2e-19	5.43e-47	5.5e-110	4.34e-05	3.32e-09	9.35e-82	2.6e-85	1.89e-32	5.29e-79	3.11e-118	4.98e-21	6.1e-09	1.37e-41	1.21e-07	2.25e-52	3.1e-24	4.31e-24	1.41e-18
M_18yrs_HIP	7.6e-111	8.87e-21	8.39e-32	4.13e-18	1.43e-15	0.000333055	1.34e-69	4.48e-18	3.23e-92	1.16e-06	5.42e-21	3.49e-10	6.89e-28	2.09e-19	1.32e-38	2.31e-94	0.000279937	6.86e-08	1.06e-75	5.1e-79	4.77e-26	2.46e-67	7.97e-107	3.61e-16	9.92e-09	1.22e-33	2.34e-06	5.22e-63	5.08e-29	3.09e-22	3.14e-18
M_18yrs_M1C	3.41e-110	1.35e-21	4.16e-31	2.75e-18	1.02e-14	0.000251045	4.89e-68	1.27e-19	7.65e-91	6.94e-07	6.13e-22	2.35e-11	5.8e-29	1.15e-19	8.85e-37	4.14e-97	0.000530022	1.36e-07	1.87e-77	1.01e-82	1.86e-26	8.64e-68	2.38e-107	3.43e-16	1.51e-08	3.45e-34	1.33e-06	3.45e-67	1.65e-30	3.4e-21	3.2e-17
M_18yrs_V1C	2.36e-112	4.79e-21	3.03e-34	4.18e-20	4.6e-16	0.000353552	2.39e-74	1.19e-19	1.15e-91	6.17e-07	2.72e-21	5.22e-12	5.53e-28	8.71e-19	2.05e-40	3.63e-102	9.62e-05	1.56e-08	1.83e-78	4.51e-84	1.06e-26	2.64e-71	1.49e-109	3.8e-16	4.99e-09	1.08e-35	9.14e-07	2.11e-58	6.69e-28	2.85e-22	1.72e-17
M_18yrs_A1C	5.85e-110	4.13e-21	2.04e-31	2.96e-18	4.73e-15	0.000536176	5.3e-69	1.41e-19	1.12e-91	6.35e-07	4.34e-21	1.65e-11	1.24e-28	2.6e-19	4.78e-37	1.47e-95	0.000227068	1.04e-07	1.2e-75	2.38e-81	8.89e-26	7.69e-68	1.1e-106	2.16e-15	1.11e-07	6.19e-34	8.83e-06	7.36e-65	2.03e-30	1.44e-21	1.59e-17
M_18yrs_ITC	7.8e-114	6.83e-21	2.62e-33	1.81e-19	9.45e-16	0.000511216	6.72e-73	4.31e-19	5.64e-91	4.42e-07	1.22e-21	8.81e-12	1.43e-27	2.61e-19	8.93e-41	3.02e-102	0.00024207	2.07e-08	9.07e-76	1.84e-83	2.34e-28	4.07e-73	1.56e-110	1.03e-17	8.69e-10	9.11e-36	4.91e-07	2.36e-63	2.52e-29	4.55e-23	9.07e-18
M_18yrs_VFC	7.53e-114	2.37e-21	2.47e-34	6.06e-20	2.66e-16	0.00056233	6e-75	3.67e-19	6.56e-93	4.23e-07	8.6e-22	1.34e-11	1.59e-29	1.89e-20	2.79e-40	4e-102	5.41e-05	1.2e-08	8.04e-82	1.82e-86	7.49e-29	2.74e-71	3.11e-110	3.12e-18	9.12e-09	1.16e-37	7.59e-07	2.8e-60	1.4e-29	2.67e-22	1.29e-17
M_18yrs_MFC	1.02e-112	1.77e-21	1.85e-32	5.26e-19	2.32e-15	0.000359016	3.03e-71	3.42e-20	8.87e-91	4.71e-07	1.91e-21	1.98e-11	1.81e-27	2.18e-19	1.64e-37	7.09e-98	0.000207577	3.81e-08	2.1e-77	3.75e-83	6.09e-27	5e-71	7.55e-109	1.3e-16	2.67e-08	4.17e-34	3.69e-06	8.62e-65	9.47e-29	1.67e-21	1e-17
M_18yrs_STC	2.97e-111	2.18e-21	1.51e-32	6.69e-19	1.52e-15	0.000432909	8.51e-71	1.03e-19	3.13e-92	5.71e-07	3.59e-22	1.32e-11	3.75e-29	3.54e-20	5.69e-37	1.31e-96	0.000135734	4.88e-08	9.22e-76	4.74e-81	1.1e-26	9.03e-69	5.24e-107	2.59e-16	1.49e-08	7.08e-35	3.68e-06	3.15e-66	1.55e-31	4.52e-22	2.14e-17
M_18yrs_DFC	2.63e-114	7.47e-21	2.69e-36	6.12e-21	2.82e-17	0.000427729	1.87e-79	9.56e-21	4.08e-95	3.28e-07	6.98e-22	1.02e-11	3.28e-28	8.68e-20	2.56e-42	7.38e-106	2.69e-05	4.56e-09	2.84e-80	1.03e-84	1.32e-30	4.12e-75	1.59e-114	4.12e-19	6.43e-09	8.23e-39	1.67e-07	6.92e-59	3.17e-25	1.79e-23	8.3e-18
M_18yrs_S1C	6.55e-111	2.16e-22	2.87e-31	3.76e-18	5.26e-15	0.000196909	2.71e-68	7.44e-19	1.45e-91	7.19e-07	4.57e-23	1.78e-11	3e-30	2.32e-20	5.67e-37	1.79e-95	0.000415735	8.82e-08	8.11e-78	1.25e-82	7.95e-26	2.03e-69	2.41e-109	9.24e-16	5.95e-08	6.31e-35	1.88e-06	8.36e-70	1.84e-31	1.98e-21	2.7e-17
M_18yrs_IPC	6.18e-113	2.48e-22	1.83e-34	1.01e-19	1.22e-16	0.000425525	1.46e-75	2.74e-19	3.01e-95	3.96e-07	7.31e-23	9.79e-12	4.22e-29	1.41e-19	5.78e-40	2.8e-100	0.000115955	3.18e-08	3.24e-80	4.5e-86	5.62e-28	4.35e-73	3.38e-113	1.17e-17	2.49e-09	1.06e-37	2.38e-07	8.62e-65	7.43e-29	1.29e-22	1.64e-17
M_18yrs_OFC	1.99e-112	5.78e-21	1.87e-33	1.82e-19	6.78e-16	0.000733766	8.8e-73	4.43e-20	6.73e-92	3e-07	1.18e-22	2.76e-12	3.9e-30	3.51e-20	1.74e-39	2.07e-99	1.73e-05	3.29e-08	6.18e-79	7.83e-85	1.18e-28	2.01e-73	2.05e-111	5.19e-18	1.13e-08	2.44e-37	7.69e-07	1.69e-62	1.39e-29	2.68e-22	1.87e-17
M_18yrs_CBC	2.2e-111	9.35e-23	4.33e-32	1.52e-18	1.95e-15	0.00021459	1.7e-72	1.14e-19	1.49e-90	1.38e-05	1.2e-21	1.2e-10	1.53e-29	1.79e-21	2.21e-37	3.18e-95	7.85e-05	4.47e-09	3.4e-77	2.1e-85	7.87e-27	3.05e-71	9.32e-110	5.03e-16	1.2e-08	8.11e-33	2.9e-06	1.11e-63	2.18e-30	4.93e-22	5.21e-17
F_19yrs_STC	2.57e-122	2.05e-23	8.94e-41	5.47e-23	1.03e-19	7.44e-05	2.14e-88	8.63e-22	8.95e-102	1.11e-07	1.69e-23	7.41e-11	1.46e-30	3.68e-22	1.49e-46	3.63e-107	0.000666038	8.77e-10	3.61e-81	4.68e-91	4.36e-32	1.37e-82	1.44e-122	5.59e-21	3.79e-09	7.07e-43	1.67e-07	1.06e-59	2.23e-28	4.11e-25	1.57e-18
F_19yrs_CBC	2.51e-118	1.65e-23	4.21e-36	1.46e-20	1.9e-17	2.77e-05	5.79e-81	3.61e-20	5.09e-95	7.3e-06	1.51e-23	6.47e-10	1.32e-29	2.67e-21	4.34e-42	6.59e-103	6.39e-05	4.16e-10	1.69e-75	3.89e-86	4.83e-28	3.62e-75	6.88e-115	9.53e-17	6.56e-09	2.95e-35	1.04e-06	1.63e-63	3.92e-29	8.78e-24	8.26e-18
F_19yrs_DFC	3.82e-121	1.47e-22	5.25e-39	5.5e-22	6.17e-19	7.64e-05	5.26e-85	2.48e-21	2.11e-101	1.19e-07	6.58e-23	1.29e-10	1.95e-32	3.67e-22	2.22e-44	2.32e-106	0.000220783	6.22e-09	2.04e-81	1.3e-90	2.34e-31	5.13e-80	3.23e-122	2.35e-20	7.12e-09	1.01e-42	2.29e-07	1.74e-63	8.49e-29	2.09e-24	1.38e-18
F_19yrs_AMY	4.34e-118	1.02e-22	1.11e-34	6.8e-20	1.08e-16	0.000240346	6.25e-77	4.05e-20	1.38e-100	1.76e-07	2.44e-25	1.08e-10	1.28e-31	3.17e-21	5.01e-42	1.78e-107	0.000336049	1.81e-08	2.93e-81	6.11e-90	2.46e-29	9.1e-79	7.38e-120	2.59e-19	9.63e-09	5.27e-40	9.17e-07	6.23e-67	2.93e-31	3.37e-23	2.13e-18
F_19yrs_OFC	5.33e-121	2.83e-22	2.85e-39	5.33e-22	3.47e-19	0.000250099	3.85e-85	1.17e-20	8.3e-103	1.36e-07	4.16e-23	1.18e-10	2.71e-30	1.94e-22	1.5e-46	6.23e-110	0.000155726	4.06e-09	1.98e-80	6.5e-89	9.66e-32	8.03e-83	1.01e-120	1.55e-20	5.93e-09	2.56e-42	1.36e-07	1.52e-58	7.83e-28	3.15e-24	9.3e-19
F_19yrs_ITC	3.76e-119	3.75e-22	3.39e-37	3.59e-21	6.15e-18	0.000220193	3.3e-81	3.18e-20	1.07e-98	1.01e-07	1.53e-23	4.55e-11	2.28e-31	1.25e-20	1.85e-43	2e-106	0.000650825	7.99e-09	3.69e-82	2.01e-90	2.24e-30	2.33e-82	2.17e-121	1.01e-19	4.73e-09	4.02e-41	2.66e-07	1.88e-65	1.57e-30	1.49e-23	1.12e-18
F_19yrs_STR	3.23e-116	3.46e-22	1.2e-37	4.91e-20	1.58e-19	0.000458356	8.48e-84	3.2e-20	2.99e-97	2.1e-07	3.35e-21	1.29e-09	9.67e-27	3.36e-19	1.13e-45	2.12e-105	7.88e-05	1.76e-09	1.85e-77	7.73e-85	6.08e-32	9.51e-78	1.82e-115	2.58e-20	1.94e-08	2.26e-39	8.88e-08	2.07e-56	1.15e-22	4.81e-24	8.35e-18
F_19yrs_S1C	1.25e-120	9.33e-22	4.15e-40	1.54e-22	1.73e-19	0.000203983	1.19e-86	3.16e-22	4.54e-98	2.26e-07	7.42e-23	9.66e-11	8.79e-30	2.94e-21	9.92e-46	4e-107	0.000471616	4.18e-09	2.57e-82	5.54e-89	4.29e-32	4.66e-80	3.98e-121	3.08e-20	8.67e-09	3.01e-42	1.63e-07	9.3e-57	4.54e-26	2.72e-24	1.25e-18
F_19yrs_M1C	9.32e-120	1.71e-22	1.91e-37	2.61e-21	4.74e-18	0.000231843	1.01e-81	2.46e-21	3.47e-100	2.84e-07	2.69e-23	1.31e-10	1.8e-31	7.73e-23	6.02e-46	2.29e-106	0.000126224	2.1e-08	2.92e-81	3.5e-90	7.48e-31	3.41e-80	1.64e-120	9.89e-20	2.43e-09	1.43e-41	3.68e-07	4.2e-63	3.94e-29	1.38e-24	1.41e-18
F_19yrs_HIP	4.51e-119	5.3e-24	1.4e-36	2.37e-20	4e-18	0.00016842	5.4e-81	1.26e-19	3.06e-99	3.79e-07	1.2e-24	1.93e-10	1.65e-30	1.14e-20	5.2e-44	2.01e-106	0.000388224	2.52e-08	1.63e-80	3.12e-87	6e-30	1.52e-76	2.49e-119	1.34e-19	5.23e-09	8.07e-41	2.55e-07	2.67e-60	5.95e-29	6.85e-24	3.47e-18
F_19yrs_A1C	9.41e-123	2.35e-22	5.26e-39	6e-22	5.68e-19	0.000169743	6.25e-85	1.08e-22	5.17e-96	3.48e-07	2.24e-22	4.73e-11	6.07e-29	8.15e-21	4.61e-46	2.98e-107	0.000122304	8.52e-10	3.18e-80	1.66e-88	1.25e-32	1.05e-80	1.64e-122	2.41e-20	3.32e-09	1.06e-41	4.87e-08	1.15e-55	8.58e-26	9.91e-25	8.16e-19
F_19yrs_V1C	2.75e-121	1.03e-23	6.26e-40	1.05e-22	3.76e-19	2.73e-05	2.68e-85	8.43e-21	3.51e-97	9.88e-08	4.94e-24	1.04e-10	5.58e-31	6.58e-23	1.43e-44	2.45e-105	0.000930845	2.33e-09	1.87e-81	2.87e-91	6.01e-31	3.95e-77	2.8e-121	1.74e-19	8.73e-08	2.21e-41	1.17e-06	6.6e-60	2.3e-27	1.95e-24	1.5e-18
F_19yrs_IPC	1e-122	4.27e-22	2.34e-41	3.26e-23	4.54e-20	0.000163748	3.81e-89	1.17e-21	2.82e-97	1.63e-07	2.81e-22	5.95e-11	1.29e-29	1.88e-21	1.48e-46	1.12e-108	0.000228345	3.96e-10	4.55e-82	2.64e-90	7.98e-33	8.2e-83	1.92e-122	6.33e-21	1.97e-09	4.35e-43	3.61e-08	1.52e-55	1.58e-26	4.36e-25	1.07e-18
F_19yrs_VFC	5.51e-122	8.48e-23	3.85e-38	1.37e-21	1.83e-18	0.000185411	5.28e-83	1.16e-21	3.98e-100	1.31e-07	6.45e-24	1.26e-10	4.16e-31	1.42e-21	6.01e-44	1.87e-103	0.00084295	8.3e-09	2.4e-82	4.76e-90	1.76e-30	1.2e-81	1.28e-119	2.83e-20	7.35e-09	1.07e-41	3.46e-07	9.39e-63	4.08e-29	1.42e-24	1.67e-18
F_19yrs_MFC	1.54e-119	2.61e-22	5.27e-39	5.41e-22	6.29e-19	0.000231482	1.4e-84	5.54e-21	2.94e-98	1.72e-07	3.6e-23	3.43e-10	2.52e-29	4.6e-21	1.39e-45	1.9e-108	0.000279303	3.67e-09	1.81e-80	1.17e-87	8.45e-32	2.18e-80	4.75e-121	1.39e-20	8.18e-09	2.53e-42	3.22e-07	3.64e-55	6.13e-26	2.78e-24	2.42e-18
F_19yrs_MD	4.35e-117	7.66e-23	7.95e-35	4.12e-19	1.33e-17	4.24e-05	2.4e-76	1.48e-20	3.05e-102	1.12e-07	1.49e-24	1.81e-09	2.76e-28	1.68e-20	2.8e-46	3.87e-107	0.000256322	7.3e-09	4.35e-75	1.3e-81	7.54e-29	5.76e-74	5.47e-114	3.86e-18	4.44e-09	5.55e-38	4.73e-07	4.63e-61	1.37e-27	6.13e-25	6.93e-19
F_21yrs_MFC	1.07e-123	3.95e-22	4.6e-42	2e-23	1.45e-20	7e-05	2.02e-93	4.31e-22	3.74e-99	6.36e-08	1.77e-21	3.75e-12	2.13e-29	1.51e-20	4.53e-49	8.23e-113	0.000118886	1.27e-09	1.85e-82	2.86e-89	1.49e-33	2.92e-82	1.4e-122	1.73e-22	3.17e-10	3.47e-44	1.98e-08	1.59e-54	2.16e-26	1.8e-26	1.14e-19
F_21yrs_M1C	2.17e-124	5.59e-22	8.52e-43	8.56e-24	6.25e-21	0.000103583	1.99e-93	1.73e-22	4.54e-103	1.54e-07	3.04e-21	3.78e-11	2.52e-29	3.62e-22	1.65e-49	1.85e-107	5.13e-05	9.66e-11	7.68e-83	5.57e-90	1.54e-34	1.62e-81	1.2e-123	9.15e-23	2.62e-09	1.01e-43	7.54e-08	4.95e-56	2.61e-25	1.26e-25	1.95e-19
F_21yrs_A1C	3.94e-122	6.64e-21	2.58e-42	1.38e-23	1.18e-20	0.000125886	4.13e-92	1.07e-22	4.62e-102	1.08e-07	7.18e-21	2.32e-11	3.61e-29	3.68e-22	1.4e-50	8.45e-111	0.000210317	8.32e-10	5.76e-81	4.13e-89	1.85e-33	1.7e-83	4.74e-123	8.95e-22	1.69e-09	3.38e-42	5.09e-08	1.97e-54	2.48e-24	1.2e-25	7.74e-19
F_21yrs_DFC	3.39e-123	2.67e-22	5.02e-44	2.13e-24	1.47e-21	0.000142266	1.17e-95	2.98e-21	1.4e-101	6.79e-08	4.88e-22	4.92e-11	8.24e-31	1.56e-21	3.64e-49	1.76e-110	0.000124881	6.43e-10	1.81e-84	1.34e-91	3.93e-35	4.03e-84	9.69e-124	8.54e-23	2.44e-09	2.91e-44	6.07e-08	8.01e-57	5.74e-25	4.53e-26	1.37e-19
F_21yrs_AMY	1.56e-118	2.37e-21	4.69e-39	6.23e-22	4.89e-19	0.000269308	2.18e-86	3.55e-22	1.54e-98	1.15e-07	9.58e-21	3.44e-11	1.12e-29	8.19e-20	1.71e-47	1.15e-109	3.53e-05	2.08e-09	3.15e-81	1.3e-88	1.03e-33	3.15e-81	1.51e-118	2.39e-22	2.31e-09	2.19e-41	5.59e-08	7.63e-56	1.67e-24	3.76e-25	6.71e-19
F_21yrs_MD	2.89e-115	2.31e-21	1.44e-36	6.96e-20	1.39e-18	5.62e-05	2.14e-81	1.92e-20	3.16e-98	1.39e-07	3.46e-22	3.4e-09	1e-27	1.04e-18	4.14e-46	3.9e-105	1.46e-05	3.92e-10	6.07e-76	7.69e-81	3.73e-29	2.54e-71	3.34e-112	8.36e-18	2.85e-08	4.73e-39	4.13e-07	1.02e-56	1.97e-26	4.39e-25	9.68e-19
F_21yrs_V1C	2.44e-122	2.78e-21	9.61e-43	1.83e-23	3.33e-21	0.000108219	1.08e-93	8.43e-22	5.2e-100	1.11e-07	1.23e-20	2.77e-11	2.93e-30	1.06e-21	3.75e-49	1.97e-108	6.25e-05	1.95e-10	4.57e-81	1.6e-88	1.31e-33	2.18e-82	3.72e-122	1.41e-21	1.38e-08	2.24e-42	3.93e-08	5.3e-51	1.7e-22	7.34e-25	1.25e-18
F_21yrs_STC	1.66e-122	4.17e-22	6.43e-43	7.42e-24	5.44e-21	8.93e-05	4.5e-94	7.14e-22	3.12e-100	9.08e-08	3.76e-21	2.6e-11	6.82e-30	3.59e-21	7.56e-49	1.08e-108	8.6e-05	9.33e-10	2.29e-83	1.17e-89	1.5e-33	1.11e-83	4.41e-123	3.21e-22	3e-09	1.46e-43	5.81e-08	3.05e-57	5.86e-26	9.31e-26	5.26e-19
F_21yrs_VFC	8.37e-124	6.46e-22	9.19e-45	1.48e-24	3.85e-22	9.18e-05	2.28e-98	1.09e-22	1.87e-100	8.07e-08	2.23e-21	1.34e-11	3.66e-29	3.45e-21	1.72e-50	6.6e-111	6.07e-05	2.7e-10	5.8e-82	5.56e-90	3.28e-35	5.67e-83	3.31e-124	3.31e-23	1.08e-09	1.15e-44	3.94e-08	3.13e-52	3.81e-24	6.56e-26	2.17e-19
F_21yrs_CBC	3.72e-120	9.67e-23	4.93e-40	6.21e-22	5.16e-20	2.29e-05	1.86e-90	1.75e-21	5.16e-101	8.97e-06	1.26e-20	2.52e-10	9.96e-29	1.52e-22	1.27e-47	9.42e-106	4.71e-06	4.12e-11	1.29e-75	5.14e-86	3.03e-30	8.8e-79	3.28e-116	2.02e-18	2.57e-09	1.02e-36	1.68e-07	9.23e-57	1.02e-25	3.68e-25	6.53e-19
F_21yrs_S1C	2.44e-124	1.86e-22	3.34e-43	1.36e-23	1.54e-21	5.09e-05	3.9e-95	8.55e-22	2.62e-100	8.02e-08	6.48e-21	2.65e-11	4.55e-29	1.99e-21	2.2e-51	1.2e-110	0.000112297	4.52e-10	7.77e-83	6.03e-89	4.01e-34	1.04e-83	2.78e-122	2.77e-22	2.37e-09	6.8e-43	9.49e-08	8.6e-53	2.99e-24	2.35e-25	1.39e-18
F_21yrs_ITC	8.44e-120	1.27e-20	3.68e-40	1.87e-22	1.26e-19	8.94e-05	1.13e-88	3.73e-22	2.37e-100	1.51e-07	6.51e-21	2.67e-11	5.41e-29	6.8e-20	1.47e-48	1.18e-110	2.99e-05	1.26e-09	3.85e-81	1.11e-87	3.19e-34	3.77e-79	2.11e-120	1.73e-22	8.02e-09	1.72e-42	6.66e-08	4.37e-54	1e-23	5.23e-25	4.83e-19
F_21yrs_IPC	9.06e-123	3.97e-21	2.99e-43	6.62e-24	2.83e-21	0.000175576	3.39e-94	2.2e-21	1.11e-100	8.02e-08	1.22e-20	2.18e-11	1e-28	1.55e-20	1.62e-50	5.98e-109	7.69e-05	9.33e-11	1.88e-81	5.79e-89	8.75e-34	7.63e-80	8.78e-121	5.01e-22	7.13e-09	3.19e-43	5.29e-08	2.79e-54	7.87e-25	1.73e-25	2.02e-19
F_21yrs_HIP	5.68e-116	4.84e-21	7.74e-36	2.25e-20	2.29e-17	0.000392247	6.8e-81	6.3e-21	3.89e-99	3.48e-07	6.4e-21	1.1e-11	5.43e-30	9.6e-20	3.53e-47	1.08e-107	6.53e-06	9.35e-09	1.55e-77	2.36e-85	1.9e-30	1.01e-74	2.03e-116	8.48e-20	4.99e-09	2.59e-40	5.35e-07	3.02e-62	1.13e-27	9.93e-25	1.19e-18
F_21yrs_STR	1.98e-114	2.4e-21	3.47e-34	1.33e-18	1.81e-17	0.000214088	1.07e-76	1.2e-20	4.61e-98	2.57e-07	7.7e-21	2.68e-11	5.45e-28	1.59e-18	1.16e-43	4e-101	8.89e-06	2.4e-08	1.38e-79	4.72e-86	4.84e-29	1.44e-72	8.91e-113	8.78e-18	1.61e-09	9.63e-38	1.29e-07	5.73e-62	1.06e-27	5.12e-23	5.13e-18
F_21yrs_OFC	1.07e-119	1.75e-20	2.25e-41	5.34e-23	2.68e-20	0.000244015	3.29e-90	1.59e-22	3.61e-98	1.04e-07	3.7e-20	1.39e-11	3.66e-29	2.63e-20	1.69e-47	9.82e-109	0.000178499	5.91e-10	6.27e-80	3.17e-87	1.17e-34	1.22e-80	2.5e-119	6.03e-23	2.54e-09	2.74e-42	5.09e-08	6.97e-55	2.32e-25	9.39e-26	6.02e-19
M_23yrs_ITC	7.94e-115	2.53e-20	1.8e-38	9.86e-22	1.18e-18	0.000396886	8.05e-85	1.41e-20	1.94e-93	2.36e-07	3.57e-21	3.07e-11	2.02e-28	8.31e-20	9.04e-44	1.58e-105	8.64e-05	5.43e-09	9.2e-81	1.06e-85	9.13e-31	9.3e-78	1.58e-115	3.85e-20	2.4e-08	1.53e-40	4.17e-07	4.94e-56	3.59e-27	8.14e-24	3.26e-18
M_23yrs_AMY	2.63e-111	5.17e-21	2.12e-34	7.09e-20	1.97e-16	0.000475172	3.21e-76	5.28e-20	2.22e-93	2.24e-07	6.57e-22	1.18e-10	4.14e-28	9.52e-20	1.76e-41	1.34e-103	0.000281575	3.88e-08	1.36e-78	1.39e-82	1.01e-27	4.32e-72	3.22e-109	2.27e-17	4.41e-08	9.05e-36	1.38e-06	1.64e-64	3.49e-30	6.29e-23	2.98e-18
M_23yrs_OFC	5.06e-114	6e-20	1.55e-38	1.6e-21	6.39e-19	0.000460124	1.15e-84	1.72e-21	6.35e-92	1.54e-07	7.2e-21	9.78e-11	1.02e-27	5.83e-19	4.65e-42	6.42e-105	8.3e-05	1.42e-09	2.33e-80	2.36e-85	1.56e-30	1.04e-76	1.41e-114	6.85e-20	4.96e-08	1.6e-40	4.14e-07	5.51e-58	1.82e-27	2.75e-23	6.78e-18
M_23yrs_MD	3.86e-109	1.53e-21	1.63e-32	8.99e-19	1.24e-15	0.000344076	4.12e-71	8.24e-19	4.27e-92	7.77e-08	2.24e-22	5.24e-11	4.27e-27	1.5e-18	2.31e-40	4.7e-101	0.000144147	2.05e-08	1.49e-74	5.94e-78	2.44e-24	4.13e-68	1.91e-104	1.07e-14	1.58e-07	1.15e-32	8.99e-06	1e-66	8.53e-32	5.14e-23	2.67e-18
M_23yrs_STC	3.91e-116	2.36e-20	2.76e-38	1.74e-21	1.04e-18	0.000565858	5.03e-84	9.36e-22	8.33e-96	1.24e-07	1.02e-21	3.21e-11	1.9e-28	1.17e-19	4.16e-43	4.51e-103	0.000152173	9.3e-09	5.19e-81	1.42e-85	1.8e-29	6.39e-74	3.78e-115	1.39e-18	4.04e-08	1.58e-40	9.26e-07	2.61e-56	7.93e-27	6.45e-24	6.53e-18
M_23yrs_VFC	2.65e-116	4.34e-21	2.9e-38	1.41e-21	1.34e-18	0.00019894	5.32e-84	9.72e-22	2.63e-96	2.12e-07	8.88e-22	4.91e-11	1.38e-29	4.45e-21	8.95e-45	1.65e-105	0.000614381	3.21e-09	1.48e-80	6.21e-88	1.52e-30	1.4e-75	2.7e-115	1.38e-19	7.4e-09	8.62e-41	1.5e-07	6.87e-57	3.84e-27	8.25e-24	7.84e-18
M_23yrs_MFC	5.14e-115	5.77e-20	2.55e-39	5.76e-22	2.88e-19	0.000370292	1.3e-86	9.89e-21	1.32e-94	1.72e-07	3.09e-21	4.74e-11	7.77e-29	2.6e-20	4.17e-44	4.2e-106	0.000786496	1.25e-09	1.3e-79	4.71e-86	3.95e-31	2.73e-76	3.95e-116	1.97e-20	2.81e-08	1.23e-41	1.37e-07	8.81e-53	1.62e-25	9.24e-24	7.76e-18
M_23yrs_M1C	1.55e-115	1.1e-20	2.24e-38	1.05e-21	1.38e-18	0.000224792	4.57e-84	3.56e-21	1.71e-94	2.41e-07	3.06e-22	3.36e-11	1.81e-28	6.91e-20	4.69e-44	9.25e-104	0.000260104	1.41e-09	3.11e-80	1.23e-85	4.1e-30	5.84e-76	3.73e-114	1.66e-19	2.2e-08	8.98e-41	3.49e-07	1.43e-55	3.62e-27	3.06e-24	3.79e-18
M_23yrs_HIP	1.8e-112	3.02e-21	1.65e-34	2.99e-19	3.8e-17	0.000524779	1.52e-76	6.35e-20	2.11e-93	3.75e-07	2.59e-21	1.25e-10	9.94e-29	1.94e-18	4.79e-41	1.38e-102	0.000129241	2.06e-08	2.12e-77	1.43e-81	3.15e-28	2.34e-70	8.51e-110	1.11e-17	1.32e-08	1.04e-37	2.39e-07	4.86e-63	4.01e-30	3.13e-23	2.98e-18
M_23yrs_CBC	3.67e-113	3.27e-21	1.21e-33	5.76e-19	1.45e-16	5.94e-05	3.05e-75	2.57e-20	8.95e-95	4.85e-06	3.62e-21	3.31e-10	2.15e-30	3.81e-22	1.73e-39	1.29e-99	6.39e-05	1.88e-09	1.34e-75	5.88e-85	1.41e-26	4.32e-71	3.37e-109	3.82e-16	3.42e-08	8.62e-34	1.08e-06	4.5e-64	3.06e-30	7.45e-23	2.9e-17
M_23yrs_S1C	9.49e-112	1.16e-19	2.39e-37	5.65e-21	2.81e-18	0.00021638	2.83e-82	1e-21	6.99e-94	1.74e-07	3.91e-21	2e-11	2.63e-28	1.3e-19	2.22e-43	1.38e-103	6.5e-05	1.43e-08	1.98e-79	3.04e-84	1.08e-31	1.17e-77	4.46e-114	1.45e-20	2.7e-08	1.09e-40	7.54e-07	6.51e-55	1.58e-25	1.35e-23	2.35e-18
M_23yrs_A1C	1.04e-115	2.11e-20	1.66e-38	1.03e-21	1.05e-18	0.000458283	2.85e-84	8.66e-21	1.91e-93	1.85e-07	1.09e-21	3.75e-11	1.8e-27	1.74e-20	2.9e-45	9.07e-107	5.91e-05	1.84e-09	7.19e-78	6.1e-84	5.13e-30	9.96e-75	7.97e-114	7.16e-19	1.19e-08	1.3e-39	3.69e-07	4.43e-58	1.23e-26	1.55e-23	3e-18
M_23yrs_IPC	1.65e-115	4.08e-21	6.94e-39	6.49e-22	6.92e-19	0.000240579	5.82e-85	1.52e-21	8.67e-97	2.57e-07	4.78e-21	2.55e-11	1.24e-28	1.67e-20	9.59e-47	1.21e-105	1.14e-05	9.15e-10	9.19e-79	7.53e-85	1.65e-30	7.68e-77	1.76e-113	2.66e-19	1.78e-08	9.41e-41	4.39e-07	2.63e-54	1.23e-25	5.15e-24	6.87e-18
M_23yrs_STR	3.11e-107	1.87e-20	1.02e-34	7.73e-19	9.05e-18	0.00047431	3.38e-77	2.02e-18	1.36e-92	1.81e-07	5.22e-21	3.03e-11	3.29e-27	1.9e-18	1.66e-38	1.18e-98	4.86e-05	1.77e-08	5.41e-76	5.92e-81	2.47e-26	1.46e-70	1.28e-106	6.07e-16	4.69e-07	6.15e-36	2.26e-06	1.17e-60	1.13e-27	6.64e-22	4.21e-17
F_30yrs_ITC	6.8e-118	2.01e-22	7.13e-38	1e-21	4.53e-18	0.000160751	2.86e-82	1.18e-20	1.02e-96	2.12e-07	1.59e-23	3.61e-10	1.87e-31	2.65e-22	1.49e-41	1.43e-104	0.00037867	4.36e-09	9e-83	9.18e-91	6.19e-31	2.64e-79	5.31e-120	3.15e-20	1.02e-08	9e-41	1.53e-07	2.04e-62	2.13e-30	2.62e-24	1.07e-18
F_30yrs_STR	1.96e-111	2.85e-22	1.9e-31	3.02e-17	4.52e-16	0.000616899	1.4e-70	1.44e-20	5.44e-95	7.87e-07	1.77e-23	1.59e-10	4.28e-30	7.15e-20	5.84e-39	3.33e-100	0.000126228	1.25e-07	3.39e-79	4.61e-87	7.73e-29	3.03e-75	1.33e-113	6.03e-18	1.37e-08	4.28e-36	3.6e-07	1.12e-65	2.21e-31	3.73e-22	1.1e-17
F_30yrs_MFC	8.59e-120	8.95e-23	1.09e-37	1.59e-21	4.42e-18	0.000107018	1.28e-82	3.27e-21	1.75e-95	1.87e-07	1.3e-24	9.38e-11	5.82e-33	1.7e-21	2.05e-41	1.48e-105	0.000572783	3.56e-09	8.29e-84	4.5e-92	1.33e-31	8.92e-79	8.56e-119	1.14e-20	1.92e-09	2.08e-41	1.92e-07	2.25e-64	3.93e-31	3.35e-24	8.73e-19
F_30yrs_OFC	1.53e-119	1.72e-22	2.31e-38	6.75e-22	2.18e-18	5.1e-05	1.36e-82	1.31e-21	1.25e-98	1.11e-07	2.01e-24	8.7e-11	2.44e-32	1.73e-22	2.95e-42	2.08e-104	0.0016345	4.9e-09	1.25e-84	8.32e-92	5.59e-31	1.71e-79	2.86e-120	3.87e-20	2.4e-09	9.71e-41	3.71e-07	6.65e-64	5.96e-32	2.52e-24	1.08e-18
F_30yrs_IPC	1.06e-121	8.44e-23	9.21e-38	1.16e-21	5.06e-18	2.89e-05	2.65e-81	6.48e-22	4.03e-97	1.95e-07	2.76e-23	4.6e-11	1.51e-31	2.87e-21	1.82e-43	1.01e-103	0.00025066	1.01e-08	7.68e-83	4.08e-92	5.36e-31	1.07e-78	4.78e-119	7.89e-20	2.71e-09	1.7e-40	2.02e-07	5.61e-63	5.61e-30	1.31e-24	1.59e-18
F_30yrs_STC	3.91e-120	7.05e-23	4.27e-39	2.8e-22	9.69e-19	0.000109281	2.95e-84	4.74e-21	3.52e-95	1.53e-07	4.96e-24	6.97e-11	3.95e-32	5.37e-22	2.53e-44	3.66e-107	0.000477773	1.45e-09	1.26e-83	8.04e-92	2.26e-31	1.32e-80	2.33e-121	8.51e-20	2.39e-09	2.01e-41	3.41e-07	3.98e-61	5.98e-28	2.82e-24	6.14e-19
F_30yrs_S1C	1.71e-120	4.37e-23	4.31e-38	5.54e-22	4.85e-18	5.08e-05	6.67e-82	1.17e-21	2.41e-97	1.98e-07	3.71e-24	6.11e-11	3.85e-31	1.18e-22	6.01e-44	1.18e-107	0.000745472	8.94e-09	5.76e-82	2.43e-91	6.59e-31	8.78e-78	4.43e-119	1.38e-19	7.74e-09	6.58e-41	5.94e-07	6.22e-64	5.94e-31	2.88e-24	7.92e-19
F_30yrs_MD	9.3e-115	6.64e-22	7.5e-33	4.32e-18	1.23e-16	2.21e-05	4.99e-73	5.67e-18	3.26e-99	3.35e-07	6.16e-25	3.41e-09	2.1e-29	8.35e-20	3.91e-42	2.34e-101	0.000248578	2.08e-08	1.49e-75	9.88e-85	3.61e-27	7.19e-75	4.24e-114	5.12e-16	3.06e-09	4.2e-37	1.98e-06	4e-64	7.65e-30	2.37e-24	7.32e-19
F_30yrs_HIP	4.81e-118	8.49e-23	3.05e-35	4.57e-20	4.48e-17	6.08e-05	1.09e-76	2.97e-20	5.66e-100	6.61e-07	8.63e-24	8.92e-11	6.85e-32	2.23e-20	2.38e-40	1.08e-105	0.000393632	1.99e-08	2.21e-82	1.19e-89	9.71e-31	4.46e-78	2.23e-119	1.04e-19	2.06e-09	2.29e-40	9.19e-08	3.99e-64	1.09e-31	3.34e-24	1.08e-18
F_30yrs_A1C	5.55e-117	5.43e-23	1.26e-34	3.25e-20	2.48e-16	5.18e-05	2.83e-74	1.44e-19	3.3e-96	1.75e-07	2.69e-24	1.73e-11	5.81e-33	7.16e-23	8.08e-41	3.97e-102	0.00140085	7.35e-08	1.77e-83	3.66e-91	5.41e-29	7.08e-79	2.35e-119	4.64e-18	2.24e-09	3.04e-38	2.38e-06	9.46e-72	2.36e-33	1.49e-23	1.95e-18
F_30yrs_V1C	5.14e-121	1.65e-23	2.38e-39	1.64e-22	9.07e-19	8.65e-05	7.08e-84	2.57e-21	2.54e-97	3.05e-07	1.46e-24	4.93e-11	8.03e-32	4.78e-22	1.31e-42	8.32e-106	0.000889306	1.26e-09	5.4e-81	7.37e-92	8.05e-31	5.95e-79	1.07e-121	3.23e-19	8.57e-09	8.42e-41	2.49e-07	5.48e-62	2.39e-29	4.58e-24	2.38e-18
F_30yrs_DFC	6.4e-118	9.36e-22	2.98e-38	1.07e-21	1.79e-18	0.000213484	2.58e-83	6.13e-21	3.4e-94	1.79e-07	1.88e-22	1.25e-10	8.83e-31	1.25e-20	3.79e-44	9.68e-106	0.000760396	4.99e-09	5.78e-81	6.08e-88	6.01e-32	6.15e-82	6.76e-119	1.82e-20	3.61e-09	1.24e-40	1.08e-07	1.19e-59	6.69e-27	1.81e-24	3.34e-19
F_30yrs_AMY	2.11e-114	2.37e-21	1.08e-34	9.16e-20	7.95e-17	0.000192328	1.28e-77	1.56e-20	3.3e-97	5.11e-07	3.58e-23	7.44e-11	3.39e-30	1.51e-19	2.24e-42	6.85e-105	0.000284421	7.94e-09	1.93e-80	1.83e-86	5.28e-30	8.47e-78	5.32e-116	5.02e-19	2.32e-08	1.43e-39	1.68e-06	3.13e-61	1.32e-28	9.3e-24	8.54e-19
F_30yrs_M1C	2.82e-120	2.21e-22	6.39e-38	8.09e-22	4.98e-18	0.000100405	8.13e-82	3.6e-21	3.86e-98	2.02e-07	5.03e-24	7.9e-11	6.27e-32	1.78e-21	1.41e-43	1.66e-103	0.000939813	9.54e-09	1.54e-82	2.24e-91	2.81e-31	1.58e-79	5.46e-120	4.52e-20	2.64e-09	3.36e-41	2.82e-07	5.73e-63	1.46e-30	1.22e-24	4.62e-19
F_30yrs_VFC	2.37e-117	4.95e-23	1.29e-34	9.64e-20	9.06e-17	0.000188786	6.51e-76	1.68e-20	2.74e-94	2.7e-07	1.18e-23	4.85e-11	5.69e-32	2.84e-21	2.43e-39	1.95e-100	0.00163361	4.41e-08	8.2e-82	6.22e-91	4.5e-29	5.9e-77	1.11e-116	8.82e-19	4.97e-09	3.8e-39	7.59e-07	1.89e-66	4.06e-32	4.27e-24	6.91e-19
F_30yrs_CBC	2.9e-116	3.15e-22	3.44e-35	7.35e-20	3.17e-17	3.15e-05	2.65e-78	5.68e-20	5.82e-97	1e-05	2e-23	4.63e-09	1.64e-30	7.49e-23	3.52e-41	2.9e-100	9.14e-05	9.59e-10	1.04e-76	3.36e-86	4.01e-29	2.21e-74	4.66e-113	2.17e-17	2.14e-09	4.44e-34	2.55e-06	2.46e-67	9.34e-30	6.51e-24	3.76e-18
M_36yrs_M1C	1.34e-117	3.37e-22	4.69e-38	1.88e-21	1.63e-18	0.000226201	4.79e-82	3.38e-20	5.16e-94	1.32e-06	4.12e-23	7.67e-10	5.09e-30	6.94e-22	1.35e-42	6.77e-100	0.00175961	4.21e-09	4.09e-80	8.83e-87	1.16e-30	4.62e-78	1.51e-116	8.08e-20	2.42e-08	1.03e-40	8.07e-07	4.64e-58	1.6e-27	6.4e-24	2.82e-18
M_36yrs_STC	1.47e-117	5.07e-22	4.54e-39	3.12e-22	9.24e-19	0.000257097	9.43e-85	6.47e-21	5.27e-96	2.46e-07	3.22e-23	4.19e-10	2.13e-30	1.43e-21	8.87e-45	8.76e-107	0.000813716	1.73e-09	2.66e-79	2.35e-86	1.24e-31	2.62e-77	2.52e-116	2.6e-20	3.39e-08	3.83e-41	1.3e-07	6.63e-57	5.68e-26	6.08e-25	9.55e-19
M_36yrs_MFC	1.68e-116	2.81e-21	7e-39	8.63e-22	5.29e-19	0.000308824	6.46e-84	3.91e-21	5.28e-94	5.06e-07	2.51e-23	1.43e-09	2e-30	1.8e-20	9.51e-43	2.9e-102	0.00112826	1.86e-09	7.64e-81	6.98e-86	2.46e-31	7.46e-79	1.83e-116	1.99e-20	1.34e-07	3.93e-41	3.27e-07	1.07e-56	6.52e-27	8.35e-24	4.61e-18
M_36yrs_ITC	6.49e-117	5.97e-21	1.44e-38	3.24e-22	2.77e-18	6.88e-05	1.1e-83	1.97e-20	2.21e-96	4.09e-07	1.54e-22	6.97e-11	2.6e-29	8.65e-20	3.93e-45	4.19e-105	0.000280092	5.67e-09	9.26e-79	6.11e-86	1.65e-32	4.62e-78	1.62e-114	2.73e-21	1.2e-09	1.45e-41	6.16e-08	1.11e-60	2.72e-27	1.98e-24	2.42e-18
M_36yrs_IPC	4.29e-119	8.08e-22	5.78e-41	6.96e-23	5.3e-20	0.000210261	6.68e-88	5.06e-21	9.8e-97	2.46e-07	1.52e-22	1.9e-10	2.32e-29	2.06e-21	2.25e-44	1.09e-101	0.00247238	4.49e-10	6.61e-80	5.06e-86	1.05e-31	3.6e-79	1.83e-117	1.05e-20	3.95e-08	5.31e-42	1.08e-07	9.75e-53	1.53e-24	3.57e-24	2.04e-18
M_36yrs_AMY	2.05e-117	7.09e-22	2.19e-35	3.73e-20	3.93e-17	0.000176328	9.46e-79	2.93e-21	1.02e-98	3.44e-07	2.95e-23	1.71e-10	3.52e-30	7.22e-20	5.09e-43	3.58e-105	0.000393884	2.04e-08	1.8e-79	2.85e-85	7.56e-29	1.07e-76	5.18e-114	2.24e-18	1.05e-08	1.87e-39	2.08e-07	1.99e-64	1.22e-28	4.15e-24	6.49e-19
M_36yrs_OFC	4.16e-119	7.65e-22	5.33e-40	1.95e-22	1.75e-19	0.000455482	3.37e-86	2.18e-21	1.03e-95	4.92e-07	9.84e-23	7.58e-10	8.65e-30	8.44e-21	1.2e-43	5.95e-103	0.00037405	1.77e-09	6.35e-80	1.29e-85	4.61e-31	8.3e-77	1.31e-115	5.64e-20	9.35e-08	2.89e-41	1.54e-07	1.04e-52	1.22e-25	7.62e-25	8.75e-19
M_36yrs_VFC	8.47e-119	2.18e-21	1.48e-40	1.5e-22	6.35e-20	0.000341338	1.91e-87	3.99e-22	1.57e-93	4.32e-07	3.01e-22	4.88e-10	3.26e-29	8.37e-21	8.29e-44	7.98e-101	0.000789133	3.92e-10	3.4e-80	2.85e-85	6.2e-31	2.41e-78	1.3e-116	6.57e-20	7.21e-08	1.14e-41	2.08e-07	3.63e-52	6.79e-25	3.7e-24	1.18e-18
M_36yrs_DFC	1.21e-120	2.61e-21	7.53e-42	1.67e-23	2.82e-20	0.000193769	4.16e-90	8.96e-22	1.18e-98	2.04e-07	1.65e-21	3.08e-10	4.4e-29	6.61e-22	9.89e-48	8.09e-106	0.00101153	2.91e-10	1.66e-80	4.82e-87	6.21e-33	2.05e-79	7.38e-119	2.23e-21	5.64e-09	6.47e-43	1.26e-07	1.29e-54	1.69e-24	5.93e-25	6.66e-19
M_36yrs_A1C	1.4e-119	1.23e-21	4.88e-41	7.32e-23	4.26e-20	0.000219328	4.69e-88	1.44e-22	2.08e-98	1.96e-07	2.44e-22	1.52e-09	1.65e-28	5.42e-21	4.83e-46	5.38e-105	0.00252453	2.59e-10	1.34e-79	4.33e-86	1.96e-31	1.42e-77	9.77e-117	4.15e-20	2.03e-08	6.61e-42	9.97e-08	9.21e-54	1.35e-24	2.64e-24	7.85e-19
M_36yrs_V1C	4.36e-120	8.17e-22	1.35e-40	5.53e-23	1.53e-19	0.000184355	1.61e-87	5.37e-22	8.83e-96	1.78e-07	4.06e-23	3.48e-10	1.97e-29	1.95e-21	9.05e-45	3.78e-106	0.000304628	1.34e-09	2.41e-81	8.41e-88	2.93e-31	2.22e-80	7.42e-119	1.62e-19	3.67e-08	1.04e-41	1.05e-07	1.24e-52	5.75e-24	2e-24	2.28e-18
M_36yrs_CBC	7.02e-116	1.47e-22	1.36e-36	1.69e-20	5.4e-18	2.49e-05	1.01e-82	8.45e-20	3.26e-95	2.38e-05	1.27e-22	1.98e-09	1.8e-29	1.97e-21	1.06e-40	1.77e-101	0.000107521	2.02e-10	4.41e-75	1.86e-85	2.46e-29	3.44e-76	1.94e-113	8.46e-18	6.55e-09	1.71e-34	2.58e-06	7.36e-63	2.26e-28	5.38e-24	3.92e-18
M_36yrs_S1C	2.07e-118	2.98e-22	2.67e-40	1.51e-22	1.13e-19	0.000307886	4.02e-86	2.87e-21	1.8e-96	6.46e-07	2.7e-23	2.99e-10	7.03e-30	6.74e-21	1.06e-43	8.43e-104	0.00292706	1.9e-09	4.34e-79	4.85e-86	1.16e-31	1.93e-78	1.46e-115	1.67e-20	3.93e-08	1.14e-41	1.2e-07	2.16e-53	1.59e-25	7.92e-24	2.7e-18
M_36yrs_HIP	3.02e-115	7.31e-22	1.77e-35	5.48e-20	2.18e-17	0.000566108	3.54e-78	5.61e-21	2.03e-96	1.64e-06	1.12e-22	2.85e-10	7.68e-29	3.31e-20	4.56e-43	1.73e-107	0.000164113	1.65e-08	3.3e-77	1.64e-82	1.49e-30	4e-75	8.47e-113	1.27e-19	6.89e-09	6.25e-40	2.98e-07	1.98e-60	3.09e-28	3.3e-24	8.17e-19
M_36yrs_STR	6.07e-112	4.13e-21	2.8e-34	1.05e-18	1.84e-17	0.000409111	1.99e-76	4.58e-20	2.31e-93	3.46e-07	1.04e-21	2.69e-10	1.87e-27	4.27e-19	1.03e-42	1.78e-101	4.09e-05	3.71e-08	5.59e-77	7.51e-84	3.14e-29	2.41e-73	1.26e-111	2.86e-18	3.75e-08	4.81e-37	7.06e-07	2.04e-62	1.41e-26	7.57e-23	8.11e-18
M_36yrs_MD	1.15e-114	4.14e-23	7.71e-33	3.28e-18	1.66e-16	4.5e-05	1.41e-72	9.63e-20	3.74e-99	5.4e-07	2.09e-24	1.98e-09	3.73e-28	3.69e-21	1.95e-45	2.34e-104	2.67e-05	8.76e-09	1.7e-72	4.78e-81	4.69e-27	1.32e-73	3.54e-110	3.09e-16	7.37e-09	1.65e-36	8.86e-07	4.24e-65	1.76e-29	1.06e-24	7.32e-19
M_37yrs_S1C	3.23e-119	6.3e-23	6.4e-37	2.9e-21	1.41e-17	0.000284066	9.44e-80	7.74e-21	3.13e-95	5.84e-07	7.74e-24	1.17e-10	1.79e-31	7.79e-22	1.52e-42	1.97e-103	0.000635928	2.34e-09	6.38e-79	5.27e-88	4.21e-30	1.13e-75	3.95e-116	6.93e-19	1.02e-08	2.14e-39	1.31e-07	1.29e-67	6.48e-31	6.36e-24	1.03e-18
M_37yrs_V1C	2.3e-117	2.86e-21	1.06e-36	8.98e-21	7.81e-18	0.000159739	3.02e-80	3.61e-20	1.12e-94	3.16e-07	3.51e-22	1.1e-10	2.35e-29	4.33e-20	1.51e-43	6.26e-102	0.000580073	4.24e-09	3.12e-79	2.06e-84	6.89e-30	4.32e-77	4.76e-116	1.91e-18	3.06e-08	3.82e-38	2.62e-07	2.81e-59	3.09e-28	3.38e-23	3.15e-18
M_37yrs_CBC	1.81e-105	4.19e-20	1.52e-29	1.44e-17	7.13e-14	0.000126095	3.01e-64	1.02e-18	6.34e-89	1.46e-05	1.78e-21	1.72e-10	5.11e-29	1.39e-20	3.54e-38	1.07e-94	0.000233827	2.39e-08	5e-70	1.13e-80	7.56e-26	1.46e-68	3.67e-106	2.64e-15	1.24e-08	6.69e-32	1.68e-06	4.23e-68	2.95e-30	4.45e-21	1.25e-16
M_37yrs_HIP	8.45e-117	3.3e-21	1.46e-37	8.03e-21	1.21e-18	0.000243583	4.29e-83	4.03e-20	1.21e-96	4.54e-07	1.51e-22	1.24e-09	1.23e-28	3.37e-19	3.15e-44	2.68e-105	5.5e-05	3.7e-09	1.93e-76	3.6e-82	1.94e-31	3.89e-78	2.79e-116	1.92e-20	2.57e-08	3.84e-40	4.09e-08	2.36e-57	2.04e-25	7.77e-24	5.51e-19
M_37yrs_IPC	7.43e-115	8.11e-21	8.59e-38	1.78e-21	3.13e-18	0.000348355	2.2e-81	5.69e-21	5.75e-97	3.4e-07	5.46e-22	1.07e-10	5.74e-29	4.98e-21	1.2e-44	7.43e-106	9.09e-05	7.39e-09	2.46e-77	1.07e-84	9.27e-31	4.58e-77	6.81e-116	1.36e-19	6.62e-09	7.73e-41	1.81e-07	7.4e-64	2.65e-27	4.7e-24	4.2e-18
M_37yrs_MD	1.62e-117	3.72e-22	4.63e-35	7.11e-19	4.4e-18	2.81e-05	2.93e-77	6.46e-20	5.17e-102	2.16e-07	3.8e-24	2.58e-09	2.08e-29	8.61e-20	3.29e-45	2.78e-106	0.000101945	3.72e-09	5.33e-75	1.51e-83	1.33e-28	1.29e-74	9.9e-115	1.32e-17	8.19e-09	2.13e-38	1.02e-06	1.02e-66	9.53e-31	1.23e-24	1.27e-18
M_37yrs_DFC	6.22e-121	3.43e-22	1.55e-40	1.47e-22	6.79e-20	0.000601557	1.06e-88	2.39e-21	8.72e-99	4.55e-07	6.94e-23	5.21e-10	2.48e-28	1.95e-20	3.67e-48	6.09e-108	0.000207967	7.04e-10	9.46e-78	5.23e-84	7.97e-32	2.55e-79	1.28e-117	2.45e-20	2.47e-08	1.64e-41	1.12e-07	1.95e-56	9.86e-25	6.25e-25	5.64e-19
M_37yrs_VFC	2.23e-119	6.1e-22	6.68e-39	1.35e-21	3.25e-19	0.000135489	3.74e-85	8.97e-22	1.52e-96	1.79e-07	4.63e-23	8.06e-10	7.19e-30	1.51e-20	2.31e-43	1.06e-104	0.000101495	2.06e-09	8.55e-80	3.89e-85	7.62e-31	4.06e-78	9.27e-118	1.1e-19	6.7e-08	7.4e-41	1.73e-07	2.4e-60	2.62e-27	1.72e-24	6.58e-19
M_37yrs_ITC	8.24e-115	9.42e-21	6.52e-39	4.83e-22	8.67e-19	0.000293231	2.75e-85	2.11e-21	6.92e-95	4.02e-07	3.5e-21	1.53e-10	2.53e-26	1.01e-20	5.3e-48	2e-108	5.11e-05	2.13e-09	1.91e-75	1.23e-81	2.28e-32	4.66e-75	7.34e-115	1.35e-20	1.34e-08	6.8e-40	5.06e-08	2.01e-51	5.83e-22	3.18e-24	1.33e-18
M_37yrs_A1C	8.81e-120	7.14e-22	3.79e-41	8.03e-23	3.02e-20	0.000170706	1.83e-89	9.97e-22	3.02e-99	2.58e-07	4.46e-22	1.05e-10	1.45e-29	3.56e-22	2.02e-47	2.31e-107	0.000153664	2.57e-09	6.48e-80	1.9e-86	9.37e-33	7.61e-80	2.98e-119	2.45e-21	5.82e-09	2.52e-42	5.77e-08	5.12e-64	3.17e-27	5.65e-25	1.43e-18
M_37yrs_M1C	6.12e-120	2.69e-22	4.73e-40	2.35e-22	1.3e-19	0.000207277	1.01e-86	9.08e-22	1.73e-95	2.32e-07	1.17e-22	2.19e-10	4.37e-29	3.28e-21	3.55e-45	4.53e-102	0.000133656	2.97e-09	1.67e-80	3.2e-87	4.32e-32	6.11e-78	3.88e-118	6.16e-21	2.56e-08	1.68e-41	3.55e-07	1.22e-59	9.87e-28	2.31e-24	9.67e-19
M_37yrs_OFC	7.43e-120	1.06e-22	1.53e-39	5.49e-22	1.81e-19	0.000312009	5.32e-86	1.4e-21	1.57e-96	2.2e-07	1.52e-22	3.78e-10	2.12e-30	4.43e-21	5.52e-44	2.28e-105	0.000187841	2.84e-09	2.7e-81	6.01e-87	5.15e-31	6.09e-78	3.79e-117	2.13e-20	8.45e-09	2.92e-41	2.18e-07	1.77e-63	1.35e-28	3.37e-24	1.27e-18
M_37yrs_STR	4.54e-111	6.33e-22	8.78e-33	1.67e-17	3.61e-17	0.000769298	1.22e-73	3.53e-18	1.71e-93	1.27e-06	6.5e-23	3.89e-10	4.34e-28	1.32e-19	4.82e-41	6.59e-100	0.000145977	1.15e-08	1.07e-73	3.92e-81	9.33e-29	5.15e-71	6.09e-110	1.18e-17	8.46e-08	2.27e-35	9.54e-07	3.32e-63	4.6e-28	2.34e-22	1.39e-17
M_37yrs_STC	6.19e-122	6.95e-24	3.08e-40	1.28e-22	1.54e-19	0.000197303	1.45e-86	1.97e-21	5.37e-102	1.09e-07	3.13e-24	9.96e-11	2.04e-31	1.77e-23	2.29e-45	4.8e-108	0.000230305	5.42e-09	3.89e-83	1.11e-90	8.17e-31	9.72e-79	7.76e-120	5.53e-20	2.89e-09	9.87e-43	1.16e-07	1.75e-69	3.12e-31	2.19e-24	8.23e-19
M_37yrs_AMY	7.2e-115	4.9e-21	1.94e-35	2.62e-20	4.9e-17	0.0003432	3.35e-78	1.12e-20	6.18e-97	5.84e-07	2.1e-22	7.74e-11	2.8e-28	5.63e-20	1.23e-44	3.29e-105	0.000128086	8.27e-09	5.34e-78	1.99e-83	2.58e-30	1.91e-74	1.98e-112	1.7e-19	2.75e-08	3.05e-38	1.35e-07	7.99e-69	1.82e-29	2.2e-24	1.14e-18
M_37yrs_MFC	5.16e-119	2.94e-20	7.07e-40	2.92e-22	1.57e-19	0.000334539	3.85e-87	9.06e-22	8.11e-94	5.86e-07	1.28e-20	5.13e-11	3.36e-25	7.29e-20	3.43e-49	6.79e-108	3.93e-05	1.4e-09	4.32e-70	4.97e-77	1.3e-33	1.45e-79	2.44e-115	1.83e-21	3.46e-08	2.42e-39	6.92e-08	6.27e-48	7.59e-20	4.09e-26	4.03e-19
F_40yrs_DFC	1.93e-110	1.02e-19	6.52e-32	3.51e-19	1.14e-14	0.000158498	1.41e-67	6.67e-20	5.13e-90	6.58e-07	3.2e-21	1.18e-11	1.9e-29	1.18e-19	4.71e-41	2.09e-98	0.000325755	9.09e-08	1.25e-74	1.27e-82	5.93e-29	2.14e-75	8.65e-111	4.26e-18	5.27e-09	1.79e-36	8.57e-07	6.27e-61	1.14e-28	1.13e-22	1.01e-17
F_40yrs_ITC	1.89e-112	9.55e-21	2.94e-36	7.36e-21	2.58e-17	0.000254073	3.85e-79	9.68e-21	6.06e-90	4.46e-07	7.12e-21	5.19e-11	2.3e-28	1.46e-19	5e-43	7.25e-101	0.000368777	1.44e-08	9.15e-77	1.16e-82	1.18e-30	2.06e-76	6.01e-111	2.76e-19	2.89e-08	3.85e-38	2.75e-07	2.87e-53	9.01e-26	9.87e-24	3.93e-18
F_40yrs_VFC	2.38e-117	2.2e-20	6.48e-40	1.55e-22	2.67e-19	0.000110674	6.63e-87	4.09e-21	1.96e-94	2.44e-07	9.07e-21	6.67e-11	2.39e-28	7.87e-21	3.05e-46	9.37e-104	3.9e-05	3.85e-10	3.46e-78	7.66e-84	9.58e-33	1.33e-79	1.29e-117	5.85e-21	5.08e-09	3.15e-41	7.19e-08	4.16e-50	1.3e-21	2.63e-24	3e-18
F_40yrs_MD	2.14e-109	4.29e-20	8.93e-32	5.28e-18	1.2e-15	0.000197548	1.37e-69	3.19e-18	2.18e-91	2.88e-07	8.8e-21	3.09e-11	3.32e-26	1.06e-18	2.91e-42	3.1e-100	0.000296943	2.09e-08	1.94e-71	3.42e-77	1.08e-26	3.54e-70	1.22e-104	3.22e-16	2.74e-08	1.7e-33	8.82e-07	8.6e-63	1.29e-27	4.14e-24	1.67e-18
F_40yrs_AMY	1.09e-107	2.29e-19	4.43e-30	1.53e-17	2.03e-14	0.00083106	1.47e-65	4.31e-19	1.61e-88	4.91e-07	1.07e-20	4e-12	6.7e-28	1.36e-18	2.43e-41	1.44e-101	0.000133643	1.32e-07	1.92e-72	1.24e-80	4.67e-28	5.5e-71	7.53e-106	5.1e-17	1.06e-08	7.26e-34	1.81e-07	4.98e-58	7.06e-26	1.23e-20	1.34e-16
F_40yrs_A1C	1.89e-110	9e-21	1.77e-31	2.62e-18	4.65e-15	0.000265329	2.12e-67	2.13e-19	6.79e-92	1.02e-06	1.96e-21	1.28e-11	1.77e-29	1.23e-20	4.9e-40	3.75e-99	0.000866109	5.94e-08	6.3e-74	3.75e-84	5.12e-28	2.75e-73	3.04e-110	1.64e-17	6.56e-09	4.57e-36	3.23e-07	1.64e-61	1.05e-28	1.02e-21	7.77e-17
F_40yrs_CBC	1.96e-109	1.65e-21	6.08e-29	5.61e-17	7.65e-14	5.53e-05	9.65e-63	3.56e-19	4.97e-89	3.14e-05	1.14e-21	2.44e-09	2.36e-29	8.69e-20	3.08e-37	1.56e-96	0.000339422	3.96e-08	1.2e-69	1.41e-81	2.84e-25	8.4e-65	1.66e-102	3.52e-14	5.41e-09	1.52e-29	8.88e-06	1.8e-63	6.78e-30	3.16e-21	4.15e-17
F_40yrs_V1C	1.34e-116	1.45e-21	2.12e-37	1.97e-21	6.91e-18	0.000109105	4.77e-81	6.4e-21	1.74e-93	6.69e-07	2.27e-22	1.53e-11	2.24e-30	4.09e-22	5.77e-43	8.95e-101	0.000131294	2.51e-09	2.09e-79	5.26e-86	1.77e-30	2.89e-77	2.73e-115	1.58e-18	1.73e-08	7.4e-38	3.64e-07	1.48e-54	2.2e-25	3.74e-23	7.68e-18
F_40yrs_OFC	1.96e-117	1.34e-20	9.52e-41	5.68e-23	1.06e-19	0.000140649	3.91e-88	4.97e-21	8.34e-95	1.9e-07	1.77e-20	6.18e-11	3.69e-28	2.72e-20	1.66e-46	2.33e-104	0.000604713	1.1e-09	7.44e-79	6.22e-86	2.06e-32	4.55e-80	3.93e-117	1.09e-20	1.49e-08	3.07e-41	2.18e-07	2.69e-49	9.34e-23	1.36e-24	5.78e-18
F_40yrs_STC	7e-117	1.69e-20	2.94e-39	4.41e-22	4.3e-19	0.000253631	3.74e-85	1.09e-20	1.13e-93	2.1e-07	3.76e-21	2.38e-11	6.93e-29	3.14e-20	1.24e-45	3.39e-103	0.000589798	6.99e-10	7.51e-78	8e-86	2.26e-31	3.35e-79	1.26e-117	1.24e-19	1.53e-08	1.82e-40	2.28e-07	3.31e-52	1.71e-24	9.42e-24	5.58e-18
F_40yrs_IPC	2.33e-118	6.11e-21	1.47e-40	5.88e-23	1.57e-19	4.67e-05	2.14e-87	1.15e-20	2.49e-95	2.51e-07	1.42e-20	5.65e-11	3.06e-28	3.17e-20	8.93e-47	2.72e-104	0.000394958	2.9e-09	1.01e-75	1.23e-83	6.95e-33	2.62e-80	5.26e-117	6.4e-21	1.72e-08	1.05e-40	1.48e-07	9.4e-51	6.44e-23	7.59e-24	5.78e-18
F_40yrs_M1C	1.85e-108	3.85e-20	5.55e-30	1.21e-17	3.14e-14	0.000300347	2.84e-64	4.83e-18	9.19e-89	1.87e-06	1.26e-21	1.32e-11	2.38e-28	9.13e-20	5.09e-39	4.33e-95	0.00203611	2.02e-07	6.37e-73	1.76e-82	1.23e-28	2.78e-73	1.07e-108	1.33e-17	7.31e-09	1.42e-35	3.89e-07	2.54e-57	1.02e-26	2.44e-21	1.63e-16
F_40yrs_HIP	1.66e-108	5.82e-19	2.08e-30	4.74e-18	2.91e-14	0.000756221	9.11e-66	4.26e-20	1.14e-85	1.6e-06	2.66e-19	4.1e-12	9.47e-27	3.46e-17	2.02e-40	1.88e-99	0.000188445	2.04e-07	6.27e-74	3.61e-80	2.96e-29	2.33e-72	1.12e-106	1.5e-18	2.61e-09	1.15e-34	1.39e-07	1.88e-57	2.93e-25	2.04e-22	2.7e-17
F_40yrs_STR	1.93e-110	2.25e-21	2.7e-32	9.66e-18	1.99e-16	0.000667545	1.46e-71	3.24e-19	7.06e-91	3.99e-07	1.83e-20	4.25e-11	8.95e-27	8.58e-19	1.69e-40	1.62e-99	0.00021326	9.71e-08	2.78e-76	1.57e-82	1.38e-27	1.28e-71	1.11e-108	7.22e-17	5.85e-08	1.61e-34	9.77e-07	3.78e-60	3.51e-27	2.4e-21	6.18e-17
F_40yrs_S1C	2.53e-109	2.96e-19	5.28e-32	4.26e-19	7.78e-15	0.00022834	5.98e-67	1.82e-19	5e-89	1.03e-06	4.8e-21	1.96e-11	8.84e-29	4.3e-19	2.08e-40	8.43e-96	0.00048455	3.63e-08	1.47e-72	3.1e-82	5.57e-30	8.5e-74	1.05e-109	1.03e-18	7.75e-09	2.81e-36	1.27e-06	6.78e-54	1.42e-25	2.3e-22	2.43e-17
