# Supplementary material for: Spatiotemporal Brain Transcriptomics Reveal Risk Gene Hot-Spots in Major Neuropsychiatric Disorders
Source: Research Square preprint supplement (doi:10.21203/rs.3.rs-7667905/v1), 2025-10-08
Supplement: Supplementary file 7 [file Supplemental Table 3. Data supporting Fig. 3, Fig. S1b, Enrichment of 15 traits risk gene set in Brainspan.xlsx]

## Sheet: r_rank_biserial
	IQ	ASD	TS	Neuroticism	ADHD	ANO	PanicDisorder	BIP	MDD	OCD	SZes	SZgw	Epilepsy	AD	PD
M_8pcw_Ocx	0.547565	0.628371	0.438276	0.508407	0.582069	0.590812	0.534997	0.474699	0.43545	0.199641	0.528255	0.419195	0.381646	0.272478	0.527596
M_8pcw_M1C.S1C	0.569451	0.695296	0.448023	0.513125	0.582652	0.612629	0.57118	0.486029	0.441037	0.228109	0.586947	0.438119	0.384734	0.27288	0.541787
M_8pcw_AMY	0.576027	0.68796	0.423705	0.525006	0.64457	0.622938	0.643175	0.484928	0.459352	0.241325	0.581401	0.446408	0.409896	0.268928	0.541063
M_8pcw_MGE	0.566508	0.671611	0.424787	0.523591	0.610608	0.600785	0.640066	0.485445	0.454311	0.252957	0.56258	0.436661	0.399107	0.26716	0.534418
M_8pcw_STC	0.573645	0.702876	0.457186	0.52248	0.608839	0.60842	0.602418	0.495193	0.454825	0.257143	0.581717	0.44194	0.410964	0.283782	0.555397
M_8pcw_URL	0.591346	0.716367	0.454039	0.52928	0.685829	0.647278	0.57774	0.489905	0.463002	0.267083	0.592401	0.444342	0.419766	0.301865	0.55733
M_8pcw_CGE	0.563829	0.677275	0.438262	0.522086	0.604523	0.596572	0.618612	0.480551	0.453217	0.236823	0.561513	0.437414	0.380799	0.269243	0.527023
M_8pcw_DTH	0.561602	0.663312	0.431413	0.517359	0.635084	0.603416	0.553696	0.478237	0.44696	0.252243	0.553001	0.423782	0.392577	0.265279	0.53811
M_8pcw_MFC	0.548033	0.627758	0.443657	0.508895	0.567847	0.588704	0.57329	0.483064	0.43881	0.240294	0.50292	0.421152	0.384551	0.281106	0.528525
M_8pcw_DFC	0.528798	0.590525	0.423994	0.493914	0.572269	0.58468	0.548161	0.474781	0.424671	0.228059	0.484307	0.412428	0.371681	0.275742	0.509845
M_8pcw_OFC	0.536931	0.584421	0.428358	0.503008	0.600956	0.582025	0.591869	0.477572	0.437091	0.291849	0.473836	0.413343	0.390648	0.296432	0.531747
M_8pcw_LGE	0.574688	0.707413	0.445196	0.525434	0.630957	0.614223	0.635696	0.484078	0.459686	0.237642	0.576496	0.445701	0.404617	0.270028	0.538988
M_8pcw_ITC	0.582352	0.708396	0.446412	0.53042	0.637855	0.625272	0.629019	0.490408	0.464037	0.252549	0.604126	0.449441	0.410614	0.271095	0.550374
M_8pcw_HIP	0.555457	0.629986	0.434864	0.509556	0.613529	0.599989	0.543226	0.468447	0.447976	0.270263	0.501892	0.423343	0.378177	0.283853	0.53498
M_8pcw_VFC	0.559694	0.647515	0.443532	0.516132	0.589736	0.59035	0.592521	0.489145	0.446302	0.233024	0.539335	0.428704	0.395787	0.274406	0.543374
M_8pcw_PCx	0.560736	0.68315	0.456217	0.513303	0.578771	0.600838	0.571531	0.500708	0.438564	0.249904	0.563516	0.440043	0.390673	0.27425	0.546254
M_9pcw_DFC	0.56975	0.708664	0.438922	0.506389	0.585445	0.626756	0.554848	0.488116	0.438865	0.225833	0.587125	0.443547	0.379375	0.273111	0.543896
M_9pcw_MFC	0.577206	0.709715	0.452315	0.513272	0.587998	0.641311	0.580196	0.484037	0.441241	0.229569	0.585784	0.44375	0.395819	0.279973	0.553298
M_9pcw_AMY	0.576018	0.715599	0.442116	0.527213	0.62297	0.619196	0.646658	0.482642	0.458996	0.247777	0.596362	0.453025	0.410993	0.258456	0.560666
M_9pcw_DTH	0.588019	0.721254	0.433199	0.529544	0.696138	0.624581	0.523712	0.476256	0.455411	0.275136	0.601287	0.444648	0.409196	0.274586	0.571795
M_9pcw_URL	0.596631	0.744031	0.445436	0.531021	0.694926	0.649484	0.573175	0.485098	0.467162	0.287938	0.620429	0.447009	0.43119	0.304032	0.594048
M_9pcw_LGE	0.576957	0.707889	0.431062	0.517887	0.627719	0.63831	0.613345	0.481529	0.450088	0.216351	0.571796	0.452152	0.385069	0.256087	0.535653
M_9pcw_M1C.S1C	0.566144	0.694352	0.442498	0.50652	0.586066	0.634484	0.527195	0.475452	0.43746	0.224716	0.561145	0.435648	0.368456	0.267216	0.527968
M_9pcw_MGE	0.587688	0.729415	0.439039	0.533183	0.620117	0.640027	0.624528	0.484238	0.465054	0.251087	0.585432	0.450914	0.402813	0.257505	0.562671
M_9pcw_TCx	0.582757	0.736883	0.452101	0.525033	0.593234	0.614834	0.547967	0.478505	0.449018	0.235829	0.61381	0.442133	0.396788	0.277347	0.559057
M_9pcw_HIP	0.575909	0.70833	0.446133	0.519384	0.610712	0.627841	0.525107	0.481373	0.449082	0.24735	0.578031	0.443286	0.400525	0.291721	0.558616
M_9pcw_Ocx	0.575794	0.719574	0.452052	0.523063	0.590075	0.613252	0.538286	0.482708	0.445684	0.240116	0.589674	0.441044	0.393721	0.279215	0.548947
M_9pcw_CGE	0.565968	0.682713	0.428554	0.52231	0.593149	0.607367	0.618989	0.476191	0.452916	0.261978	0.557125	0.436146	0.382779	0.259302	0.53907
M_9pcw_OFC	0.573203	0.714024	0.450181	0.519958	0.595058	0.629202	0.558853	0.487127	0.438547	0.232699	0.5824	0.446249	0.403322	0.292227	0.549595
M_9pcw_PCx	0.580807	0.727409	0.447137	0.518334	0.595053	0.614571	0.557402	0.489439	0.445598	0.250383	0.599996	0.444569	0.402238	0.275205	0.554335
F_12pcw_HIP	0.568581	0.668586	0.431313	0.50182	0.621622	0.626539	0.580044	0.479011	0.445051	0.252176	0.57064	0.435052	0.40942	0.277095	0.552495
F_12pcw_DTH	0.592447	0.725489	0.421193	0.516648	0.684653	0.64734	0.612065	0.49336	0.452123	0.228985	0.596132	0.463429	0.416736	0.283269	0.53418
F_12pcw_AMY	0.569866	0.683827	0.43172	0.518102	0.615805	0.616375	0.619011	0.482469	0.455343	0.247626	0.570819	0.447841	0.396943	0.26321	0.540164
F_12pcw_A1C	0.599029	0.736221	0.451677	0.510567	0.666517	0.644325	0.56011	0.472186	0.43842	0.228422	0.619874	0.452419	0.42558	0.275535	0.548161
F_12pcw_V1C	0.589597	0.724573	0.452646	0.504537	0.628695	0.651052	0.541569	0.467533	0.438123	0.25246	0.567088	0.444704	0.41517	0.294515	0.550447
F_12pcw_MFC	0.591735	0.746632	0.478177	0.509836	0.62249	0.633798	0.531934	0.475254	0.438151	0.24874	0.616158	0.453866	0.418063	0.285468	0.574297
F_12pcw_STR	0.5718	0.677914	0.429195	0.515754	0.673547	0.593579	0.608401	0.460983	0.455301	0.294903	0.578333	0.438712	0.418726	0.26135	0.56854
F_12pcw_M1C	0.596303	0.74202	0.45053	0.513578	0.646952	0.634328	0.5371	0.485114	0.436166	0.265518	0.609705	0.450986	0.429482	0.283398	0.562043
F_12pcw_DFC	0.597887	0.746393	0.460625	0.514954	0.61965	0.629876	0.540594	0.480724	0.443412	0.286316	0.630024	0.451834	0.425503	0.281634	0.578023
F_12pcw_ITC	0.589561	0.725702	0.446243	0.512616	0.636245	0.622388	0.589038	0.472379	0.442604	0.262649	0.609519	0.446037	0.419306	0.277974	0.562587
F_12pcw_VFC	0.599885	0.741613	0.456087	0.50432	0.625516	0.63993	0.547611	0.476492	0.439032	0.270078	0.594929	0.451559	0.428919	0.27872	0.567076
F_12pcw_STC	0.597333	0.741974	0.463362	0.510857	0.666056	0.646716	0.54669	0.476715	0.435027	0.271316	0.610514	0.450056	0.42116	0.274499	0.55177
F_12pcw_IPC	0.600484	0.74127	0.455987	0.502213	0.663131	0.635973	0.532301	0.465144	0.432649	0.248002	0.587568	0.445574	0.425052	0.2758	0.55899
F_12pcw_OFC	0.592979	0.731156	0.449455	0.513096	0.620789	0.624153	0.555226	0.480987	0.439813	0.263649	0.611824	0.447922	0.420543	0.282784	0.561677
F_12pcw_S1C	0.590493	0.734888	0.440754	0.499639	0.645556	0.641358	0.531177	0.464736	0.430254	0.234052	0.60295	0.446252	0.418335	0.267513	0.56202
F_12pcw_STC.1	0.588773	0.719184	0.446411	0.502972	0.658303	0.612532	0.541514	0.472357	0.433346	0.215673	0.601049	0.44308	0.4194	0.273559	0.556566
F_12pcw_V1C.1	0.584657	0.732274	0.465002	0.512035	0.626459	0.62297	0.527927	0.484583	0.438905	0.232595	0.596881	0.452707	0.418791	0.282666	0.557195
F_12pcw_A1C.1	0.581672	0.728486	0.462931	0.492041	0.660186	0.599603	0.529885	0.445553	0.427689	0.230396	0.593206	0.438534	0.418503	0.256836	0.558509
F_12pcw_CB	0.595515	0.738036	0.453191	0.513029	0.706402	0.625513	0.569897	0.463326	0.461276	0.30645	0.602065	0.447786	0.427051	0.26826	0.609362
F_12pcw_ITC.1	0.593325	0.734088	0.459419	0.512695	0.65332	0.600237	0.571684	0.46349	0.437803	0.239789	0.61124	0.44612	0.427493	0.274952	0.567268
F_12pcw_IPC.1	0.585361	0.727327	0.449448	0.500808	0.660803	0.609914	0.546634	0.470349	0.432469	0.230246	0.581389	0.447272	0.426608	0.263667	0.558882
F_12pcw_S1C.1	0.584614	0.717618	0.448744	0.498579	0.63513	0.616307	0.538208	0.467292	0.426529	0.219531	0.601142	0.444795	0.414673	0.257861	0.557177
F_12pcw_DTH.1	0.584762	0.708126	0.430299	0.502814	0.709311	0.613152	0.520765	0.462219	0.449166	0.274432	0.567303	0.432924	0.430435	0.259692	0.578777
F_12pcw_HIP.1	0.574036	0.692436	0.437682	0.5091	0.625274	0.60291	0.603383	0.463972	0.444836	0.21932	0.580293	0.438563	0.406539	0.27412	0.561854
F_12pcw_DFC.1	0.585926	0.717695	0.459318	0.495723	0.640188	0.598786	0.546964	0.452657	0.431545	0.258082	0.614726	0.437166	0.41045	0.254054	0.555393
F_12pcw_OFC.1	0.569347	0.695284	0.444795	0.488996	0.581998	0.590901	0.543006	0.450328	0.435103	0.25325	0.582391	0.434737	0.405934	0.254546	0.541334
F_12pcw_M1C.1	0.59444	0.7446	0.443314	0.504901	0.641743	0.632931	0.529842	0.480832	0.427289	0.237794	0.615634	0.452118	0.419963	0.265998	0.56205
F_12pcw_VFC.1	0.579305	0.703	0.452914	0.489764	0.627111	0.608795	0.53859	0.456829	0.42683	0.238795	0.575637	0.441166	0.416944	0.268349	0.564222
F_12pcw_AMY.1	0.58913	0.714135	0.453986	0.526936	0.658864	0.628524	0.628621	0.48148	0.462475	0.27188	0.595435	0.470539	0.425423	0.275748	0.576528
F_12pcw_STR.1	0.573726	0.669376	0.424707	0.512971	0.666241	0.606012	0.598696	0.468178	0.452656	0.266138	0.574526	0.440585	0.393769	0.265338	0.536655
F_12pcw_AMY.2	0.58008	0.697214	0.440658	0.52206	0.644902	0.599139	0.63195	0.484581	0.46598	0.272472	0.590448	0.458943	0.420265	0.260943	0.569818
F_12pcw_M1C.2	0.583727	0.717234	0.436048	0.487695	0.645708	0.603412	0.52216	0.444576	0.424984	0.225338	0.576746	0.432714	0.409227	0.25543	0.547037
F_12pcw_ITC.2	0.576397	0.68787	0.463515	0.496338	0.647521	0.595264	0.543328	0.45477	0.430635	0.234704	0.57184	0.435347	0.40486	0.261853	0.552662
F_12pcw_VFC.2	0.580841	0.685178	0.430496	0.493403	0.633977	0.621885	0.57115	0.459232	0.429334	0.256988	0.576202	0.430055	0.40379	0.258335	0.55052
F_12pcw_STR.2	0.586312	0.727942	0.426923	0.517743	0.68214	0.611155	0.615036	0.481184	0.459133	0.246001	0.617925	0.460608	0.419491	0.279075	0.549058
F_12pcw_CBC	0.575544	0.686659	0.443199	0.513847	0.701803	0.60616	0.567071	0.466856	0.456091	0.289255	0.577764	0.437436	0.4084	0.273381	0.569347
F_12pcw_DTH.2	0.574132	0.673954	0.41763	0.504163	0.69751	0.599725	0.576669	0.454807	0.45365	0.266667	0.54076	0.43647	0.423817	0.270278	0.568931
F_12pcw_DFC.2	0.579732	0.715354	0.429005	0.501791	0.614743	0.607154	0.543529	0.465909	0.43652	0.208948	0.60188	0.437035	0.40465	0.251849	0.548913
F_12pcw_OFC.2	0.590275	0.728376	0.442935	0.505927	0.615664	0.605829	0.535325	0.470524	0.437283	0.239338	0.616488	0.444029	0.408044	0.255152	0.56094
F_12pcw_S1C.2	0.584708	0.711528	0.451228	0.500192	0.664276	0.613886	0.528619	0.460123	0.426534	0.22835	0.594305	0.438533	0.408698	0.253278	0.546418
F_12pcw_V1C.2	0.585564	0.735799	0.451723	0.507389	0.630479	0.623919	0.538284	0.485886	0.438558	0.254179	0.617126	0.442315	0.405052	0.272517	0.563998
F_12pcw_MFC.1	0.590108	0.742497	0.443821	0.507321	0.617624	0.617884	0.533573	0.470407	0.437327	0.255681	0.620548	0.447441	0.416118	0.262178	0.561718
F_12pcw_HIP.2	0.581744	0.716557	0.43748	0.519969	0.612104	0.620005	0.570604	0.477675	0.451647	0.264175	0.61265	0.448709	0.411871	0.27966	0.55447
F_12pcw_IPC.2	0.565174	0.673507	0.447315	0.478352	0.656089	0.592906	0.536279	0.447096	0.422203	0.216626	0.538438	0.428083	0.393158	0.253469	0.533705
F_12pcw_A1C.2	0.587314	0.727034	0.450478	0.499879	0.651439	0.608328	0.540012	0.460341	0.436494	0.254003	0.617353	0.444014	0.417053	0.253624	0.553679
M_13pcw_STR	0.588388	0.743564	0.434083	0.511933	0.690678	0.620079	0.618284	0.485729	0.456064	0.270228	0.610053	0.462179	0.417916	0.285479	0.551348
M_13pcw_M1C	0.596435	0.747992	0.451241	0.505407	0.672294	0.619556	0.554179	0.466586	0.436261	0.23005	0.623304	0.454519	0.416611	0.256102	0.542862
M_13pcw_AMY	0.593611	0.747069	0.460628	0.511742	0.645492	0.614066	0.571927	0.472208	0.447776	0.259422	0.593698	0.463606	0.415421	0.268897	0.546588
M_13pcw_S1C	0.59542	0.744554	0.449758	0.494601	0.673807	0.625446	0.537049	0.46954	0.427631	0.231399	0.600237	0.45181	0.415263	0.256658	0.541135
M_13pcw_V1C	0.592843	0.745221	0.450123	0.504531	0.645796	0.64023	0.527974	0.48087	0.435837	0.250779	0.618722	0.455913	0.409382	0.274176	0.54808
M_13pcw_A1C	0.580979	0.716111	0.44559	0.505529	0.644889	0.608464	0.574654	0.46572	0.443855	0.255576	0.601462	0.443769	0.399289	0.258549	0.54732
M_13pcw_HIP	0.573952	0.696307	0.443923	0.506397	0.639281	0.616572	0.575588	0.470783	0.449996	0.26869	0.601725	0.44646	0.42073	0.275992	0.544639
M_13pcw_VFC	0.597559	0.744254	0.451579	0.500575	0.662724	0.61892	0.556906	0.47366	0.431297	0.26424	0.618038	0.451691	0.417202	0.259429	0.542885
M_13pcw_MFC	0.587706	0.73027	0.447405	0.493741	0.633474	0.610059	0.563642	0.464346	0.437655	0.270105	0.585137	0.444356	0.417817	0.250737	0.545488
M_13pcw_STC	0.600818	0.751419	0.459187	0.521683	0.663677	0.642292	0.544446	0.488671	0.450885	0.269021	0.635344	0.462803	0.42075	0.269986	0.561846
M_13pcw_OFC	0.584508	0.719826	0.439293	0.507791	0.634607	0.610204	0.590771	0.47083	0.447665	0.269037	0.596115	0.4439	0.412086	0.254804	0.553276
M_13pcw_IPC	0.595958	0.751427	0.471421	0.5008	0.660712	0.625164	0.534457	0.463381	0.434162	0.251692	0.621846	0.456696	0.413681	0.259654	0.54705
M_13pcw_DFC	0.594444	0.739665	0.46185	0.498339	0.65225	0.609912	0.558834	0.46985	0.436965	0.229512	0.609513	0.45086	0.412741	0.251072	0.537121
M_13pcw_ITC	0.593505	0.742438	0.447049	0.518474	0.649668	0.635215	0.551893	0.490023	0.448797	0.228128	0.610182	0.457407	0.416606	0.269959	0.543346
F_13pcw_STR	0.587092	0.722271	0.427851	0.529435	0.664792	0.658618	0.607464	0.505786	0.458759	0.237563	0.584918	0.460447	0.415214	0.290561	0.543047
F_13pcw_S1C	0.599097	0.742302	0.457731	0.508168	0.653642	0.663428	0.532883	0.482278	0.434048	0.226621	0.606785	0.449732	0.418877	0.275823	0.553735
F_13pcw_V1C	0.591382	0.73187	0.452569	0.519676	0.636069	0.665063	0.531442	0.489545	0.448459	0.229911	0.585675	0.454378	0.415762	0.294436	0.540963
F_13pcw_AMY	0.589797	0.727043	0.453338	0.529959	0.632565	0.652263	0.629044	0.496581	0.462817	0.237356	0.597768	0.463283	0.420834	0.278028	0.551063
F_13pcw_IPC	0.589297	0.7299	0.441496	0.51031	0.658466	0.628676	0.52525	0.474448	0.434899	0.221219	0.604548	0.447684	0.422949	0.271217	0.550035
F_13pcw_CB	0.589365	0.709857	0.450625	0.527577	0.695175	0.666735	0.531989	0.494868	0.466145	0.279136	0.585099	0.452079	0.422228	0.30186	0.567281
F_13pcw_DFC	0.594073	0.730535	0.435397	0.513666	0.62378	0.64354	0.551624	0.477434	0.440181	0.255547	0.60495	0.4508	0.413452	0.270557	0.561956
F_13pcw_OFC	0.588213	0.743808	0.432668	0.507563	0.617981	0.636384	0.546093	0.483893	0.44454	0.27541	0.627293	0.448857	0.407789	0.276061	0.545811
F_13pcw_STC	0.582521	0.706324	0.449123	0.500855	0.656966	0.633216	0.561627	0.455894	0.426621	0.239167	0.588085	0.437954	0.408892	0.261372	0.548558
F_13pcw_A1C	0.596906	0.733369	0.449854	0.508997	0.679144	0.638635	0.574696	0.472583	0.444581	0.254175	0.611188	0.460271	0.435191	0.28487	0.561096
F_13pcw_HIP	0.589576	0.722542	0.444828	0.523721	0.637761	0.662208	0.573774	0.488514	0.454106	0.240005	0.592739	0.460152	0.418485	0.2889	0.569804
F_13pcw_M1C	0.591879	0.740754	0.44681	0.502521	0.640858	0.639278	0.533275	0.470685	0.432832	0.230852	0.630874	0.448172	0.4204	0.264376	0.552673
F_13pcw_ITC	0.587066	0.715595	0.451492	0.500163	0.65584	0.634368	0.560389	0.465387	0.439625	0.238471	0.593372	0.44507	0.404912	0.268216	0.544159
F_13pcw_MD	0.585074	0.700453	0.429567	0.509937	0.687754	0.639983	0.553705	0.45911	0.448502	0.277914	0.536758	0.441249	0.431506	0.284064	0.571315
F_13pcw_MFC	0.595558	0.741359	0.452382	0.52224	0.628479	0.662331	0.542176	0.493462	0.450056	0.24662	0.616376	0.452555	0.422908	0.282789	0.565027
F_13pcw_VFC	0.596906	0.741099	0.444998	0.504808	0.627798	0.639088	0.519297	0.473894	0.429891	0.207832	0.629494	0.446419	0.422459	0.279247	0.551197
M_13pcw_S1C.1	0.582446	0.71918	0.43989	0.503771	0.632897	0.605576	0.532707	0.467699	0.435008	0.216485	0.597812	0.438282	0.405844	0.258274	0.536418
M_13pcw_DFC.1	0.577791	0.702015	0.438008	0.497099	0.605447	0.595897	0.548587	0.4692	0.427991	0.223835	0.589197	0.431305	0.40302	0.26688	0.544294
M_13pcw_CB	0.591361	0.727322	0.448031	0.534939	0.68603	0.643962	0.559599	0.489407	0.464393	0.268331	0.594629	0.451631	0.42109	0.293463	0.572906
M_13pcw_AMY.1	0.580552	0.704426	0.453091	0.531853	0.606635	0.608815	0.613772	0.487846	0.465488	0.231572	0.597834	0.459857	0.402464	0.26542	0.548313
M_13pcw_ITC.1	0.577084	0.70676	0.428938	0.510307	0.594085	0.606985	0.559674	0.473431	0.440453	0.214312	0.593908	0.43423	0.39796	0.263822	0.540801
M_13pcw_HIP.1	0.574006	0.702741	0.440796	0.52177	0.603604	0.618763	0.57721	0.487173	0.446245	0.265663	0.585181	0.443292	0.403609	0.29093	0.54157
M_13pcw_IPC.1	0.584368	0.728992	0.443438	0.50152	0.652098	0.621622	0.530339	0.467714	0.425308	0.19763	0.616462	0.445786	0.406533	0.262072	0.539594
M_13pcw_A1C.1	0.586434	0.704217	0.450404	0.499218	0.651171	0.624012	0.544506	0.456689	0.432493	0.243253	0.590341	0.439247	0.407148	0.261917	0.542078
M_13pcw_VFC.1	0.577687	0.689632	0.453553	0.495081	0.610983	0.590168	0.534543	0.451441	0.432326	0.214324	0.590146	0.429164	0.400309	0.251448	0.539913
M_13pcw_STR.1	0.566533	0.67836	0.401703	0.503616	0.653335	0.603238	0.603902	0.469387	0.444444	0.264705	0.571003	0.433355	0.404571	0.27049	0.525763
M_13pcw_OFC.1	0.561401	0.656209	0.439925	0.49907	0.600487	0.587815	0.568227	0.463883	0.440688	0.25242	0.558915	0.424129	0.395272	0.259921	0.543839
M_13pcw_MFC.1	0.561458	0.664314	0.429889	0.504351	0.562281	0.588445	0.553532	0.466183	0.442446	0.27005	0.572	0.430054	0.391079	0.263911	0.535339
M_13pcw_V1C.1	0.577474	0.720931	0.459257	0.519644	0.603324	0.626902	0.536861	0.490003	0.441383	0.223188	0.587495	0.451578	0.404472	0.278975	0.539733
M_13pcw_M1C.1	0.58504	0.727371	0.436845	0.506584	0.628391	0.620246	0.545905	0.484221	0.434994	0.217258	0.601345	0.448962	0.411779	0.267633	0.553363
M_16pcw_VFC	0.593948	0.71388	0.448565	0.508022	0.658701	0.649325	0.580863	0.492523	0.441277	0.236046	0.575498	0.457724	0.432984	0.278313	0.540907
M_16pcw_OFC	0.593045	0.71312	0.442092	0.500036	0.668237	0.658778	0.564696	0.475271	0.432856	0.217997	0.575969	0.453983	0.425334	0.280464	0.534727
M_16pcw_STC	0.582653	0.7051	0.45945	0.5074	0.639596	0.648281	0.594963	0.475185	0.440359	0.228823	0.567481	0.456901	0.413631	0.282075	0.554422
M_16pcw_DFC	0.576251	0.692585	0.443357	0.504242	0.612439	0.638696	0.572357	0.480728	0.440462	0.241468	0.557049	0.445243	0.403215	0.275727	0.527431
M_16pcw_IPC	0.58933	0.724016	0.436334	0.505504	0.652329	0.634727	0.579959	0.487699	0.43925	0.236009	0.61848	0.451849	0.419509	0.270572	0.523666
M_16pcw_A1C	0.596943	0.729333	0.434035	0.502761	0.669891	0.663471	0.545999	0.47828	0.433514	0.221596	0.598916	0.460098	0.421066	0.268669	0.540026
M_16pcw_MFC	0.572304	0.674246	0.432363	0.502067	0.60747	0.636142	0.575289	0.480411	0.43133	0.223942	0.549031	0.443942	0.389333	0.282594	0.524497
M_16pcw_STR	0.591809	0.733955	0.419706	0.506563	0.694451	0.652198	0.60294	0.478976	0.454283	0.229049	0.579079	0.469647	0.418069	0.27311	0.549385
M_16pcw_MD	0.586339	0.707357	0.455793	0.508821	0.675302	0.626082	0.610302	0.467508	0.453042	0.309629	0.555746	0.445481	0.440773	0.297653	0.589524
M_16pcw_V1C	0.582301	0.709273	0.450335	0.511998	0.647197	0.651551	0.560147	0.486635	0.438114	0.21583	0.568437	0.452301	0.415088	0.27637	0.516951
M_16pcw_VFC.1	0.612676	0.761322	0.449161	0.509872	0.655446	0.674224	0.526586	0.469578	0.437598	0.248625	0.627777	0.463114	0.432021	0.280752	0.554359
M_16pcw_STC.1	0.597333	0.736918	0.454128	0.518332	0.668345	0.668317	0.546409	0.481331	0.444069	0.242631	0.600444	0.46454	0.432927	0.300843	0.550232
M_16pcw_IPC.1	0.605217	0.754741	0.466499	0.508407	0.679329	0.659398	0.529188	0.473462	0.43691	0.233111	0.624593	0.455775	0.424046	0.274219	0.552347
M_16pcw_A1C.1	0.603251	0.76614	0.454081	0.512267	0.661063	0.650708	0.532747	0.470937	0.44243	0.252835	0.639503	0.458832	0.424794	0.27073	0.562342
M_16pcw_MD.1	0.59778	0.72757	0.434872	0.511876	0.730616	0.658982	0.548194	0.48459	0.456123	0.286569	0.580515	0.458648	0.452621	0.289083	0.59131
M_16pcw_AMY	0.583599	0.694417	0.456893	0.523251	0.639741	0.656379	0.616732	0.496089	0.460473	0.225878	0.561109	0.457012	0.412895	0.302036	0.543279
M_16pcw_V1C.1	0.591193	0.748168	0.448647	0.524867	0.640532	0.658538	0.508858	0.494682	0.443181	0.239248	0.602626	0.45782	0.416444	0.290719	0.551649
M_16pcw_ITC	0.608117	0.76404	0.456356	0.522932	0.655279	0.664862	0.574976	0.492841	0.451504	0.248903	0.643278	0.466472	0.437257	0.287939	0.578445
M_16pcw_CBC	0.569604	0.672983	0.448595	0.524122	0.672199	0.638141	0.550357	0.475994	0.467366	0.315042	0.534303	0.440454	0.426395	0.317059	0.574549
M_16pcw_HIP	0.60179	0.753367	0.462405	0.531512	0.650239	0.655239	0.573864	0.488443	0.463926	0.257116	0.640761	0.462883	0.457251	0.296191	0.576892
M_16pcw_STR.1	0.602543	0.75241	0.450171	0.526567	0.700964	0.665522	0.618245	0.489461	0.467616	0.263437	0.602164	0.469103	0.440947	0.290664	0.570837
M_16pcw_OFC.1	0.606809	0.765536	0.461453	0.521061	0.629751	0.661818	0.525814	0.475644	0.452018	0.253179	0.63118	0.462767	0.439195	0.279898	0.55536
M_16pcw_DFC.1	0.607491	0.761852	0.450951	0.525925	0.624012	0.646696	0.538934	0.498095	0.452384	0.252421	0.625471	0.467959	0.433127	0.284232	0.556621
M_16pcw_M1C	0.605744	0.766059	0.458029	0.504309	0.653964	0.64412	0.534426	0.467857	0.443398	0.239662	0.640039	0.451702	0.430486	0.257805	0.56376
M_16pcw_MFC.1	0.606982	0.758541	0.446408	0.525549	0.620237	0.66607	0.529322	0.493097	0.445374	0.236024	0.613619	0.459299	0.425586	0.283576	0.552076
M_16pcw_S1C	0.601644	0.760523	0.454798	0.512313	0.679898	0.640725	0.541139	0.466055	0.439059	0.224164	0.627798	0.457102	0.434713	0.277355	0.549321
M_16pcw_HIP.1	0.577619	0.708922	0.456709	0.515415	0.595753	0.609143	0.612841	0.488229	0.456761	0.263468	0.609838	0.446819	0.389429	0.289199	0.565778
M_16pcw_ITC.1	0.589231	0.722905	0.450599	0.503285	0.658644	0.631623	0.595905	0.464371	0.442398	0.244065	0.6058	0.456514	0.42361	0.271095	0.557653
M_16pcw_DFC.2	0.581457	0.69825	0.435632	0.497602	0.617225	0.601079	0.551961	0.457431	0.438404	0.270906	0.586515	0.435441	0.417112	0.262866	0.550423
M_16pcw_IPC.2	0.602689	0.755178	0.460961	0.512146	0.674629	0.648001	0.557914	0.490436	0.443375	0.223838	0.621194	0.458816	0.437585	0.292986	0.558947
M_16pcw_STC.2	0.598888	0.740517	0.462335	0.50765	0.65725	0.64927	0.57656	0.477916	0.439849	0.232182	0.617669	0.459821	0.440345	0.285542	0.564942
M_16pcw_V1C.2	0.578502	0.699069	0.45187	0.500638	0.651534	0.619392	0.556451	0.468995	0.439921	0.263976	0.585371	0.439647	0.421435	0.282534	0.557944
M_16pcw_MD.2	0.571394	0.654823	0.439881	0.495164	0.711834	0.597258	0.589646	0.452896	0.450155	0.295826	0.516211	0.446195	0.422297	0.276226	0.575679
M_16pcw_STR.2	0.589106	0.732216	0.448692	0.511846	0.693953	0.608264	0.618681	0.470466	0.461595	0.270868	0.577366	0.457351	0.426011	0.277127	0.568138
M_16pcw_M1C.S1C	0.604895	0.737369	0.455479	0.507898	0.648052	0.626583	0.567581	0.476433	0.446531	0.272114	0.608447	0.449691	0.433001	0.280291	0.558033
M_16pcw_A1C.2	0.593027	0.734239	0.440014	0.505098	0.65934	0.634573	0.567403	0.476007	0.441382	0.229642	0.623811	0.450084	0.43118	0.279446	0.554312
M_16pcw_VFC.2	0.604634	0.74577	0.452316	0.511912	0.637886	0.630157	0.566987	0.473653	0.446258	0.257552	0.619991	0.455712	0.446224	0.288555	0.565087
M_16pcw_AMY.1	0.593621	0.746008	0.460549	0.520967	0.662257	0.618809	0.642766	0.473969	0.465219	0.259503	0.615432	0.466263	0.429105	0.28132	0.578937
M_16pcw_MFC.2	0.583177	0.68386	0.444685	0.519044	0.666078	0.618612	0.573284	0.478086	0.453712	0.281439	0.534924	0.438418	0.429503	0.294226	0.574087
F_17pcw_STR	0.584072	0.681304	0.437241	0.50321	0.684186	0.672408	0.626274	0.473008	0.458386	0.263482	0.527321	0.465366	0.424973	0.306185	0.554179
F_17pcw_STC	0.591614	0.725158	0.459419	0.498141	0.643333	0.673405	0.564581	0.476011	0.436352	0.209553	0.59905	0.462576	0.405164	0.273242	0.528483
F_17pcw_MD	0.588686	0.677709	0.447654	0.513024	0.707535	0.641664	0.598833	0.476045	0.468097	0.291366	0.54	0.449141	0.434842	0.300719	0.579227
F_17pcw_A1C	0.595559	0.731896	0.43931	0.49212	0.655318	0.658881	0.579954	0.47252	0.436738	0.250622	0.614574	0.46192	0.427327	0.265558	0.540796
F_17pcw_HIP	0.587762	0.689048	0.449183	0.512514	0.643743	0.666075	0.591464	0.492665	0.45406	0.253732	0.575103	0.461515	0.435939	0.313289	0.553029
F_17pcw_DFC	0.60032	0.729731	0.451124	0.500808	0.640307	0.672348	0.569679	0.472717	0.437333	0.23382	0.596266	0.46901	0.42272	0.279082	0.526699
F_17pcw_VFC	0.603534	0.732799	0.445071	0.519167	0.647851	0.676457	0.583089	0.489477	0.452456	0.249072	0.591336	0.472219	0.426513	0.285265	0.545357
F_17pcw_IPC	0.590289	0.742261	0.446662	0.490451	0.675594	0.626852	0.537794	0.462335	0.435386	0.236614	0.605659	0.458022	0.422167	0.254666	0.538313
F_17pcw_M1C.S1C	0.598123	0.728	0.465598	0.499041	0.663917	0.636246	0.566749	0.477255	0.439409	0.26481	0.599456	0.460931	0.431695	0.266835	0.551288
F_17pcw_V1C	0.592466	0.731494	0.455306	0.511173	0.666547	0.65845	0.567495	0.497935	0.441925	0.233438	0.589863	0.464729	0.419991	0.279283	0.527132
F_17pcw_CBC	0.58781	0.705528	0.454902	0.513422	0.69681	0.640181	0.574802	0.477323	0.472225	0.313217	0.568715	0.451771	0.419643	0.29943	0.572465
F_17pcw_OFC	0.603489	0.736175	0.443771	0.510546	0.634181	0.652149	0.60705	0.475463	0.45339	0.270521	0.612799	0.468889	0.418941	0.267269	0.556689
F_17pcw_AMY	0.589283	0.713601	0.46172	0.517223	0.615844	0.646204	0.633485	0.493251	0.455494	0.241219	0.601163	0.464123	0.407235	0.280506	0.553487
F_17pcw_MFC	0.599759	0.733562	0.46089	0.503545	0.63667	0.650106	0.587084	0.474311	0.445145	0.273264	0.606697	0.458844	0.424952	0.27454	0.548003
F_19pcw_STC	0.586986	0.696557	0.43829	0.496121	0.637624	0.66333	0.597318	0.477233	0.432526	0.226651	0.579721	0.463412	0.408921	0.280191	0.528467
F_19pcw_IPC	0.584179	0.682589	0.427582	0.49487	0.636653	0.653958	0.573538	0.478956	0.426468	0.239723	0.571436	0.456334	0.410899	0.284702	0.514087
F_19pcw_M1C.S1C	0.582058	0.67685	0.449259	0.494912	0.645752	0.645705	0.575036	0.481123	0.430782	0.249864	0.551867	0.453722	0.419503	0.28137	0.516353
F_19pcw_MFC	0.593263	0.685709	0.451047	0.506648	0.628095	0.670846	0.593134	0.483706	0.449588	0.252777	0.545549	0.466482	0.422895	0.299431	0.538093
F_19pcw_V1C	0.583837	0.671959	0.441448	0.502009	0.635485	0.666089	0.569521	0.491445	0.428759	0.247503	0.568498	0.453902	0.413248	0.295769	0.510857
F_19pcw_HIP	0.574357	0.669152	0.437635	0.500464	0.606542	0.656732	0.596275	0.476728	0.45353	0.254394	0.557731	0.447301	0.41473	0.306667	0.553988
F_19pcw_A1C	0.587253	0.698942	0.443067	0.492624	0.643891	0.661735	0.577362	0.477571	0.427394	0.206285	0.584311	0.456139	0.406752	0.281943	0.526234
F_19pcw_MD	0.584643	0.67216	0.435055	0.504617	0.674838	0.649016	0.603482	0.474888	0.447845	0.292018	0.520516	0.445231	0.415309	0.306458	0.564434
F_19pcw_VFC	0.602786	0.712382	0.456544	0.501816	0.661336	0.656595	0.573768	0.482894	0.440278	0.244323	0.59251	0.468596	0.42115	0.276727	0.536163
F_19pcw_STR	0.581748	0.680802	0.429944	0.517147	0.661065	0.657195	0.643703	0.496153	0.462813	0.258366	0.527403	0.46269	0.413948	0.305661	0.547094
F_19pcw_DFC	0.589602	0.694019	0.448328	0.49178	0.621617	0.66801	0.595268	0.479458	0.436669	0.226002	0.570775	0.454226	0.413566	0.276444	0.517247
F_21pcw_CBC	0.592745	0.724151	0.443169	0.507241	0.692466	0.634412	0.527982	0.460797	0.463671	0.324872	0.597308	0.453712	0.405248	0.278155	0.583113
F_21pcw_ITC	0.595009	0.73854	0.460748	0.498554	0.663162	0.674162	0.57997	0.483317	0.439261	0.272979	0.620889	0.461506	0.43388	0.28095	0.555834
M_21pcw_MFC	0.601618	0.750136	0.456253	0.500106	0.680136	0.637375	0.584514	0.473006	0.44813	0.271028	0.598134	0.471545	0.459307	0.282453	0.572369
M_21pcw_M1C	0.602773	0.74479	0.455824	0.506634	0.646679	0.629944	0.573872	0.479709	0.453579	0.262279	0.627366	0.468409	0.43753	0.275703	0.557958
M_21pcw_STR	0.587589	0.72265	0.44062	0.502322	0.711645	0.635281	0.603276	0.471098	0.453885	0.289596	0.586657	0.464009	0.440301	0.298108	0.562561
M_21pcw_HIP	0.603023	0.737892	0.475852	0.514825	0.651814	0.646207	0.600638	0.47663	0.46675	0.284193	0.618218	0.472479	0.450163	0.298316	0.589676
M_21pcw_STC	0.605884	0.745119	0.457754	0.502345	0.669948	0.656359	0.576758	0.480789	0.450874	0.267983	0.60803	0.468301	0.455421	0.281262	0.561785
M_21pcw_ITC	0.609409	0.752225	0.461553	0.501335	0.666301	0.651639	0.570737	0.472456	0.449628	0.300661	0.621662	0.461979	0.454087	0.274013	0.561872
M_21pcw_AMY	0.598176	0.749022	0.465345	0.514953	0.653428	0.643613	0.594292	0.481454	0.462033	0.286136	0.615561	0.467298	0.444193	0.28878	0.586729
M_21pcw_VFC	0.598002	0.748008	0.47803	0.521913	0.656307	0.640377	0.620489	0.480443	0.467175	0.31166	0.633411	0.475126	0.452568	0.299878	0.589695
M_21pcw_OFC	0.593335	0.730419	0.450494	0.489418	0.664435	0.634404	0.577239	0.471986	0.442138	0.29114	0.583383	0.45449	0.442627	0.27528	0.557277
M_21pcw_V1C	0.603899	0.747296	0.466815	0.509639	0.690268	0.656048	0.572003	0.48181	0.445402	0.259779	0.61352	0.471431	0.437853	0.278837	0.552042
M_21pcw_S1C	0.604205	0.743021	0.456362	0.501715	0.660834	0.636923	0.56816	0.477477	0.449702	0.280338	0.594249	0.465954	0.44972	0.278987	0.564714
M_21pcw_CBC	0.590056	0.713027	0.458864	0.519681	0.684882	0.626672	0.560988	0.476809	0.471805	0.307544	0.594917	0.453633	0.42041	0.288814	0.580284
M_21pcw_IPC	0.601164	0.742868	0.458554	0.505534	0.656785	0.630458	0.567111	0.4747	0.448114	0.265061	0.618357	0.460131	0.446704	0.275919	0.557945
M_21pcw_DFC	0.598704	0.728257	0.457967	0.507212	0.677933	0.642362	0.589915	0.483624	0.452874	0.259912	0.598122	0.467412	0.449757	0.302506	0.556913
M_24pcw_HIP	0.586021	0.676575	0.46134	0.510451	0.633862	0.628503	0.615653	0.475474	0.467431	0.336033	0.569458	0.455583	0.435704	0.306418	0.581339
M_24pcw_AMY	0.578115	0.68971	0.456927	0.518183	0.617421	0.636462	0.593068	0.480508	0.458853	0.293804	0.598872	0.45007	0.41816	0.304162	0.571235
M_24pcw_DFC	0.602817	0.728566	0.445814	0.506225	0.637105	0.632452	0.558834	0.468968	0.444266	0.329994	0.579449	0.457968	0.440975	0.308659	0.580202
M_24pcw_S1C	0.606778	0.736187	0.462118	0.512028	0.671215	0.653493	0.566178	0.487978	0.451779	0.338673	0.604779	0.46416	0.452778	0.306205	0.569324
M_24pcw_MD	0.58195	0.657384	0.439842	0.507848	0.715713	0.634685	0.579203	0.457695	0.459224	0.358499	0.518317	0.442262	0.438713	0.331309	0.588212
M_24pcw_STR	0.593137	0.719468	0.442997	0.519227	0.683757	0.636388	0.612405	0.488547	0.468913	0.312479	0.573013	0.468263	0.428749	0.305557	0.567692
M_24pcw_A1C	0.594513	0.728098	0.454272	0.509826	0.662594	0.637864	0.561148	0.475185	0.449669	0.305892	0.625464	0.462292	0.448982	0.29591	0.573168
M_24pcw_IPC	0.593348	0.718734	0.454974	0.499337	0.678391	0.642174	0.560087	0.469187	0.444635	0.321072	0.599547	0.456442	0.440865	0.285466	0.554244
M_24pcw_OFC	0.591089	0.699169	0.47113	0.496764	0.628514	0.628458	0.572948	0.458806	0.442247	0.304706	0.563179	0.451828	0.444259	0.289024	0.552787
M_24pcw_STC	0.589076	0.695128	0.451567	0.497987	0.648305	0.644467	0.576139	0.482522	0.442771	0.301188	0.570324	0.458655	0.442256	0.318356	0.561206
M_24pcw_ITC	0.600947	0.738816	0.465724	0.500452	0.656252	0.647377	0.580474	0.47666	0.447326	0.325931	0.629284	0.467806	0.453001	0.284152	0.580453
M_24pcw_VFC	0.600156	0.709277	0.447924	0.499791	0.645717	0.655497	0.570307	0.475697	0.446011	0.300262	0.562953	0.453732	0.446215	0.309887	0.576773
M_24pcw_M1C	0.592602	0.705047	0.441221	0.506997	0.665862	0.628353	0.5783	0.476604	0.447324	0.324781	0.552598	0.459794	0.443057	0.310522	0.572903
M_24pcw_MFC	0.603403	0.732572	0.453598	0.508198	0.623677	0.649786	0.562981	0.475602	0.45285	0.321093	0.58526	0.461118	0.442833	0.298271	0.583835
M_24pcw_CBC	0.585184	0.683565	0.449721	0.518008	0.699101	0.620208	0.551459	0.475698	0.469171	0.376231	0.579195	0.447118	0.424393	0.300235	0.581002
M_24pcw_V1C	0.59755	0.72455	0.471521	0.512719	0.66097	0.656057	0.576116	0.485795	0.449615	0.310005	0.607943	0.46151	0.438075	0.313824	0.564367
F_25pcw_A1C	0.572514	0.671635	0.441805	0.488635	0.649756	0.612011	0.563535	0.456112	0.441252	0.255362	0.549259	0.443982	0.441333	0.326059	0.591948
F_26pcw_STC	0.581755	0.716563	0.43752	0.519998	0.612111	0.620015	0.570627	0.477698	0.45167	0.264237	0.612676	0.448725	0.411903	0.279269	0.554487
F_26pcw_V1C	0.567878	0.658777	0.422952	0.482318	0.631788	0.631076	0.573973	0.447935	0.441631	0.255515	0.541338	0.437066	0.427621	0.324979	0.576399
F_26pcw_DFC	0.56185	0.654408	0.430975	0.490226	0.640765	0.601943	0.56286	0.444168	0.438876	0.272816	0.517835	0.436018	0.432045	0.32918	0.574873
F_35pcw_CBC	0.562207	0.632407	0.450568	0.480513	0.600941	0.636959	0.514149	0.4757	0.429508	0.247195	0.49817	0.424614	0.389916	0.307149	0.557654
F_35pcw_VFC	0.579787	0.659055	0.457922	0.495063	0.644468	0.645503	0.622915	0.4809	0.434752	0.26653	0.547494	0.452772	0.449895	0.30721	0.552412
M_37pcw_A1C	0.586162	0.694212	0.460449	0.50035	0.652651	0.643117	0.622539	0.469239	0.447849	0.28203	0.573411	0.457165	0.45301	0.342742	0.58723
M_37pcw_OFC	0.584222	0.680371	0.456055	0.513151	0.654334	0.660856	0.598021	0.489364	0.44745	0.268468	0.552203	0.455999	0.449112	0.333175	0.571452
M_37pcw_AMY	0.560161	0.630493	0.44306	0.498118	0.64136	0.644569	0.582419	0.469818	0.446503	0.297598	0.512492	0.437831	0.413402	0.348327	0.576055
M_37pcw_V1C	0.581041	0.669985	0.453679	0.5091	0.638551	0.662821	0.599084	0.490541	0.450967	0.286918	0.551438	0.458511	0.445846	0.34428	0.566011
M_37pcw_MFC	0.582976	0.677934	0.459249	0.509069	0.646935	0.645762	0.601732	0.481115	0.451019	0.277842	0.5554	0.458736	0.452349	0.340353	0.570125
M_37pcw_MD	0.544897	0.579045	0.427563	0.492239	0.6681	0.622009	0.551459	0.452814	0.436075	0.305988	0.460748	0.415189	0.386551	0.360784	0.581079
M_37pcw_CBC	0.569598	0.65195	0.460157	0.516326	0.65397	0.636677	0.548269	0.49129	0.450333	0.309919	0.531032	0.443741	0.404168	0.350619	0.588217
M_37pcw_STR	0.560552	0.635031	0.446432	0.494416	0.65138	0.641388	0.586391	0.46464	0.439474	0.29493	0.525821	0.439534	0.410259	0.352527	0.572226
M_37pcw_IPC	0.586464	0.694703	0.456754	0.507279	0.65984	0.63345	0.597298	0.485478	0.450342	0.301854	0.572118	0.463022	0.458951	0.324801	0.572387
M_37pcw_ITC	0.587945	0.698243	0.449353	0.505243	0.66276	0.665611	0.600961	0.484575	0.443462	0.280457	0.551938	0.460495	0.456013	0.331135	0.569105
M_37pcw_S1C	0.57899	0.666126	0.451545	0.507968	0.644362	0.643074	0.603877	0.466844	0.445592	0.285535	0.536688	0.454401	0.440423	0.350599	0.585176
M_37pcw_DFC	0.58529	0.673937	0.458029	0.508108	0.650765	0.641093	0.596374	0.477404	0.448932	0.273125	0.544377	0.460078	0.450185	0.339442	0.570274
M_37pcw_STC	0.583353	0.677971	0.445493	0.506975	0.646303	0.651379	0.598844	0.483015	0.44474	0.267767	0.539006	0.459275	0.451427	0.338338	0.575379
M_37pcw_M1C	0.575706	0.661511	0.459902	0.505284	0.64653	0.644787	0.58581	0.488035	0.444484	0.301342	0.520373	0.450536	0.444624	0.359614	0.564905
M_37pcw_VFC	0.582454	0.666696	0.458413	0.511322	0.645032	0.659533	0.583717	0.479987	0.44307	0.263501	0.540298	0.454984	0.449266	0.347608	0.569775
M_37pcw_HIP	0.557134	0.629631	0.442984	0.494118	0.641937	0.650234	0.565598	0.462577	0.440313	0.26932	0.502334	0.432108	0.413628	0.356557	0.568001
M_4mos_STC	0.579076	0.709701	0.462526	0.488889	0.64217	0.605664	0.581679	0.449839	0.447498	0.294485	0.569458	0.457556	0.456825	0.276702	0.585824
M_4mos_STR	0.571259	0.657013	0.443494	0.493892	0.645908	0.62902	0.544538	0.465409	0.438804	0.298034	0.54633	0.463734	0.440685	0.317081	0.560055
M_4mos_V1C	0.600666	0.734309	0.450188	0.507893	0.672169	0.632822	0.591386	0.476249	0.453774	0.258158	0.606162	0.47476	0.475089	0.303929	0.594077
M_4mos_CBC	0.568581	0.641372	0.441676	0.504008	0.584599	0.602236	0.562888	0.458594	0.447882	0.314007	0.560454	0.441082	0.412709	0.327975	0.590474
M_4mos_HIP	0.587363	0.705759	0.452325	0.502379	0.639433	0.640897	0.587985	0.464044	0.457702	0.28399	0.547118	0.46061	0.464107	0.303241	0.591301
M_4mos_MD	0.576879	0.671563	0.434504	0.502745	0.658323	0.636597	0.525943	0.451083	0.451921	0.294861	0.553387	0.442824	0.445105	0.300755	0.594428
M_4mos_ITC	0.574309	0.704971	0.448847	0.486787	0.619343	0.600687	0.586966	0.444248	0.448493	0.294061	0.574305	0.448398	0.457841	0.260318	0.582372
M_4mos_AMY	0.584564	0.690882	0.453738	0.506833	0.666279	0.654581	0.606904	0.471999	0.465388	0.28365	0.569977	0.463369	0.464433	0.317449	0.592281
M_4mos_MFC	0.57896	0.701188	0.440931	0.489791	0.637362	0.616877	0.579487	0.468673	0.448595	0.280768	0.560614	0.453919	0.459287	0.286283	0.578038
M_4mos_M1C	0.578808	0.679101	0.43726	0.494425	0.670812	0.635308	0.565686	0.448839	0.444642	0.295461	0.556375	0.450722	0.441436	0.329244	0.589311
M_4mos_DFC	0.563163	0.636691	0.438157	0.492129	0.65991	0.61757	0.582798	0.448709	0.436088	0.331043	0.487418	0.443668	0.432041	0.323817	0.569408
M_4mos_OFC	0.579328	0.673433	0.453614	0.497552	0.676836	0.636562	0.58272	0.44994	0.444095	0.289494	0.524702	0.456938	0.436356	0.331786	0.586309
M_4mos_A1C	0.561979	0.639471	0.42682	0.491073	0.642521	0.628412	0.583981	0.449198	0.435674	0.318839	0.495585	0.449456	0.423996	0.324956	0.586542
M_4mos_STC.1	0.563088	0.642774	0.439042	0.491023	0.659849	0.620442	0.590103	0.44816	0.435678	0.306275	0.512147	0.451381	0.427681	0.317539	0.582354
M_4mos_VFC	0.57455	0.662289	0.445133	0.497319	0.664107	0.649389	0.574674	0.458763	0.442122	0.314966	0.510256	0.446497	0.442904	0.334385	0.582513
M_4mos_ITC.1	0.565745	0.651111	0.453978	0.48593	0.664431	0.617078	0.599737	0.43543	0.438343	0.312855	0.501097	0.447496	0.432717	0.322558	0.583578
M_4mos_AMY.1	0.572768	0.666324	0.440206	0.496923	0.653433	0.640708	0.560743	0.457741	0.452156	0.311017	0.542277	0.444277	0.432793	0.331906	0.597907
M_4mos_M1C.1	0.582574	0.685754	0.46649	0.498753	0.664173	0.624606	0.590059	0.474683	0.451284	0.296169	0.574801	0.464531	0.465731	0.318601	0.590866
M_4mos_MD.1	0.579299	0.669649	0.436032	0.505744	0.673898	0.643152	0.547063	0.45822	0.449512	0.332488	0.550116	0.451618	0.449373	0.311537	0.59965
M_4mos_OFC.1	0.578353	0.667681	0.441973	0.493838	0.654942	0.633586	0.605927	0.464535	0.448354	0.28111	0.544827	0.458036	0.458522	0.299311	0.574006
M_4mos_STR.1	0.574846	0.676461	0.433009	0.496372	0.67308	0.629996	0.59378	0.454004	0.455601	0.329283	0.553308	0.460481	0.44161	0.312718	0.582544
M_4mos_STC.2	0.582493	0.688429	0.445084	0.498505	0.651587	0.631265	0.628869	0.466501	0.450538	0.310802	0.578896	0.465492	0.467867	0.309955	0.575743
M_4mos_A1C.1	0.589876	0.698114	0.453868	0.507699	0.647437	0.632695	0.598092	0.476082	0.452294	0.293464	0.58077	0.459554	0.47179	0.309063	0.580364
M_4mos_HIP.1	0.576548	0.66756	0.444106	0.499178	0.664809	0.625399	0.594627	0.452712	0.457207	0.31091	0.547162	0.451441	0.457433	0.324077	0.593263
M_4mos_AMY.2	0.592246	0.704332	0.450061	0.507783	0.662502	0.654774	0.593062	0.464811	0.457588	0.283576	0.557687	0.46501	0.466985	0.32046	0.603041
M_4mos_MFC.1	0.586238	0.705795	0.458209	0.501022	0.664047	0.631191	0.593947	0.472737	0.451781	0.26887	0.572448	0.469429	0.473916	0.30888	0.589304
M_4mos_V1C.1	0.600474	0.717094	0.463368	0.506955	0.671321	0.64102	0.600439	0.480492	0.460702	0.277268	0.612771	0.471635	0.47252	0.312566	0.588199
M_4mos_ITC.2	0.588318	0.703274	0.444557	0.500745	0.660049	0.628562	0.608574	0.468216	0.451493	0.293727	0.585573	0.470439	0.474166	0.307983	0.586212
M_4mos_S1C	0.586026	0.697497	0.444206	0.497539	0.660243	0.63246	0.593876	0.472892	0.44968	0.28313	0.563172	0.468511	0.468967	0.31257	0.589433
M_4mos_IPC	0.589914	0.702018	0.459364	0.506146	0.662937	0.636794	0.608071	0.465582	0.443974	0.267146	0.580892	0.465373	0.474292	0.308238	0.586223
M_4mos_CBC.1	0.583333	0.67714	0.450518	0.508348	0.618034	0.629583	0.554024	0.47709	0.455234	0.29788	0.573363	0.454005	0.43125	0.323753	0.601442
M_4mos_DFC.1	0.587677	0.703153	0.446486	0.49613	0.670435	0.636029	0.592541	0.479391	0.449017	0.274014	0.553127	0.472606	0.476416	0.303496	0.576477
M_4mos_VFC.1	0.59172	0.698412	0.461214	0.505943	0.665001	0.646521	0.600125	0.473954	0.448871	0.308223	0.580487	0.464487	0.471487	0.309688	0.585669
M_10mos_S1C	0.578273	0.656326	0.436435	0.490402	0.633551	0.609734	0.601709	0.458226	0.442801	0.276835	0.536104	0.455917	0.441827	0.300042	0.576549
M_10mos_IPC	0.574175	0.670246	0.447713	0.499737	0.615182	0.628201	0.584636	0.476001	0.450424	0.288521	0.534249	0.454351	0.439753	0.305948	0.577038
M_10mos_STC	0.577795	0.669563	0.446145	0.495793	0.642893	0.622017	0.589934	0.469094	0.450928	0.258405	0.536262	0.459155	0.453367	0.315471	0.578815
M_10mos_DFC	0.576147	0.657264	0.431868	0.488918	0.630014	0.604331	0.587054	0.455237	0.451301	0.276201	0.533347	0.453907	0.44205	0.300589	0.571328
M_10mos_OFC	0.579933	0.669881	0.444014	0.494891	0.644682	0.605463	0.594027	0.454885	0.452576	0.268283	0.546674	0.468069	0.452017	0.301318	0.575994
M_10mos_MFC	0.587361	0.694483	0.457623	0.506795	0.637957	0.648605	0.584992	0.478031	0.460344	0.27342	0.582473	0.469452	0.459453	0.312551	0.581729
M_10mos_CBC	0.579118	0.707667	0.446582	0.50318	0.531753	0.611765	0.527862	0.47627	0.438759	0.271572	0.602827	0.451932	0.408669	0.3133	0.591109
M_10mos_ITC	0.572644	0.673202	0.45237	0.483273	0.63545	0.621851	0.587347	0.460042	0.442642	0.261973	0.533179	0.462053	0.45384	0.293498	0.560751
M_10mos_MD	0.558602	0.616106	0.418243	0.49417	0.646417	0.627122	0.542384	0.455167	0.450941	0.265864	0.506931	0.438218	0.419232	0.303878	0.577292
M_10mos_V1C	0.582352	0.688281	0.448822	0.500282	0.634915	0.62408	0.596967	0.471443	0.452932	0.238105	0.576624	0.462506	0.451163	0.286567	0.579573
F_1yrs_AMY	0.591905	0.718305	0.46177	0.512492	0.664915	0.633275	0.556681	0.472045	0.467203	0.282649	0.565088	0.469338	0.482427	0.317335	0.616456
F_1yrs_M1C	0.594264	0.73711	0.441821	0.502554	0.667623	0.629146	0.559638	0.481634	0.4545	0.287263	0.622516	0.467221	0.493169	0.310063	0.615528
F_1yrs_DFC	0.600296	0.737013	0.457555	0.514318	0.670884	0.629124	0.552482	0.484485	0.456952	0.301962	0.606085	0.477586	0.478519	0.307429	0.617686
F_1yrs_STC	0.601335	0.744418	0.46289	0.514307	0.667832	0.630107	0.553213	0.468514	0.461753	0.286548	0.608694	0.479292	0.473409	0.300837	0.616766
F_1yrs_V1C	0.604404	0.744644	0.466955	0.509808	0.679984	0.633412	0.563205	0.466343	0.465187	0.284762	0.622749	0.470819	0.474399	0.301137	0.62392
F_1yrs_MFC	0.595346	0.733427	0.461096	0.512226	0.66336	0.62357	0.547883	0.469377	0.463431	0.328864	0.61652	0.478188	0.472272	0.310084	0.618113
F_1yrs_OFC	0.594877	0.718428	0.45883	0.511318	0.676435	0.634165	0.563375	0.474885	0.463312	0.293855	0.56932	0.476584	0.471181	0.321471	0.609486
F_1yrs_ITC	0.600089	0.738845	0.462454	0.513627	0.672367	0.624681	0.57446	0.474725	0.464488	0.284427	0.620826	0.476047	0.477684	0.30736	0.617046
F_1yrs_S1C	0.602091	0.742122	0.471282	0.514113	0.679107	0.621238	0.572501	0.477995	0.460119	0.28091	0.594954	0.478384	0.474618	0.305041	0.616038
F_1yrs_VFC	0.599734	0.738132	0.4737	0.515449	0.673098	0.621908	0.560579	0.474426	0.464078	0.274295	0.618806	0.47654	0.481335	0.307491	0.621806
F_1yrs_CBC	0.584365	0.714876	0.455066	0.507676	0.557738	0.603463	0.539918	0.469896	0.447716	0.323876	0.632431	0.4572	0.442985	0.330621	0.619427
F_1yrs_A1C	0.596818	0.741523	0.4651	0.507689	0.666633	0.623881	0.559614	0.470775	0.462396	0.267414	0.593382	0.473052	0.481834	0.312977	0.62065
F_1yrs_MD	0.58098	0.694232	0.436341	0.510268	0.67941	0.657164	0.535173	0.449439	0.464874	0.317156	0.58457	0.451148	0.46323	0.305148	0.617992
F_1yrs_HIP	0.591284	0.715652	0.45291	0.516986	0.643659	0.626429	0.555074	0.461316	0.472119	0.284984	0.587018	0.460282	0.47644	0.324369	0.615337
F_1yrs_IPC	0.596975	0.735176	0.464856	0.511484	0.672182	0.622022	0.576557	0.472354	0.458633	0.298748	0.614101	0.476312	0.48204	0.296456	0.618404
F_1yrs_STR	0.586912	0.709382	0.454165	0.503557	0.665609	0.626205	0.553006	0.463159	0.45843	0.325577	0.579542	0.467359	0.459651	0.307493	0.587753
F_2yrs_VFC	0.555398	0.603786	0.407855	0.483848	0.6111	0.619783	0.559853	0.448291	0.416167	0.268102	0.487467	0.43165	0.425343	0.358591	0.550962
F_2yrs_IPC	0.560847	0.636311	0.391617	0.474767	0.621313	0.631787	0.532694	0.426803	0.415021	0.269065	0.517451	0.423214	0.416542	0.324641	0.550967
F_2yrs_S1C	0.552819	0.613621	0.401773	0.481735	0.601275	0.614577	0.550008	0.444868	0.416045	0.284727	0.50821	0.428591	0.420807	0.353241	0.549299
F_2yrs_ITC	0.557365	0.640065	0.394499	0.475503	0.625091	0.622944	0.558757	0.436896	0.411323	0.246189	0.530103	0.422784	0.431969	0.336363	0.546347
F_2yrs_MD	0.550679	0.59258	0.394134	0.468284	0.632666	0.620149	0.523892	0.418564	0.409849	0.285541	0.51859	0.408636	0.39571	0.347436	0.554709
F_2yrs_DFC	0.554893	0.610627	0.414191	0.477121	0.609223	0.62476	0.575934	0.439937	0.418069	0.293281	0.50419	0.421636	0.426315	0.346948	0.558298
F_2yrs_MFC	0.554615	0.632889	0.407999	0.47539	0.616252	0.614103	0.544112	0.427395	0.412225	0.281027	0.518925	0.429522	0.427597	0.328917	0.540486
F_2yrs_CBC	0.562168	0.626604	0.417894	0.482944	0.557782	0.596867	0.515349	0.458738	0.429565	0.307365	0.560581	0.437238	0.41952	0.326757	0.573919
F_2yrs_HIP	0.542927	0.587149	0.392333	0.47359	0.605835	0.615082	0.54265	0.434578	0.421941	0.279521	0.472971	0.418811	0.420651	0.340164	0.556782
F_2yrs_OFC	0.561711	0.627311	0.39033	0.484886	0.630466	0.619705	0.544612	0.429109	0.419945	0.298459	0.505999	0.435636	0.434854	0.330085	0.560219
F_2yrs_V1C	0.564936	0.624673	0.404051	0.482476	0.638792	0.628852	0.5714	0.44558	0.423179	0.292998	0.525955	0.429916	0.435518	0.3463	0.554345
F_2yrs_STC	0.556333	0.630968	0.423015	0.475684	0.580663	0.612928	0.548201	0.433087	0.416132	0.299744	0.515083	0.426095	0.411231	0.330202	0.554984
F_3yrs_STR	0.550451	0.625703	0.421355	0.480013	0.621437	0.626737	0.580533	0.445087	0.426172	0.298616	0.500969	0.434225	0.404385	0.350316	0.566439
F_3yrs_STC	0.571416	0.658604	0.438207	0.505119	0.652578	0.627202	0.574892	0.45704	0.438815	0.316383	0.522659	0.453906	0.448272	0.345019	0.584808
F_3yrs_IPC	0.565306	0.639682	0.434367	0.489642	0.645644	0.607971	0.576318	0.439819	0.437788	0.311529	0.523409	0.445923	0.441381	0.330415	0.580325
F_3yrs_ITC	0.56633	0.651359	0.436196	0.487997	0.66092	0.626303	0.578025	0.457442	0.435165	0.325269	0.50547	0.446833	0.440968	0.333052	0.569337
F_3yrs_CBC	0.573547	0.686199	0.449496	0.486859	0.527	0.636321	0.511093	0.458758	0.425892	0.320106	0.597197	0.450574	0.419712	0.329493	0.585157
F_3yrs_AMY	0.556794	0.634974	0.42734	0.48163	0.612558	0.602536	0.582181	0.441189	0.43218	0.303948	0.493624	0.434054	0.423892	0.343145	0.578877
F_3yrs_VFC	0.562786	0.625912	0.436338	0.484257	0.646739	0.601376	0.585352	0.439269	0.4409	0.325594	0.498364	0.44012	0.434941	0.331202	0.567263
F_3yrs_M1C	0.569506	0.65609	0.431441	0.48986	0.654693	0.610394	0.584409	0.445322	0.444306	0.319629	0.51462	0.446604	0.442799	0.324982	0.581628
F_3yrs_A1C	0.568049	0.638169	0.437479	0.501017	0.623069	0.629779	0.567199	0.456496	0.438672	0.305202	0.491375	0.446196	0.450079	0.347194	0.571626
F_3yrs_MD	0.56178	0.621874	0.420628	0.499069	0.655505	0.641959	0.556437	0.445456	0.438364	0.295038	0.517821	0.439433	0.416627	0.357954	0.583294
F_3yrs_V1C	0.571306	0.659154	0.429553	0.497793	0.662779	0.627341	0.574074	0.454573	0.4421	0.28798	0.532881	0.449116	0.448167	0.331833	0.572475
M_3yrs_OFC	0.572308	0.665134	0.428175	0.491195	0.655468	0.624977	0.583927	0.459835	0.4444	0.279411	0.542838	0.446479	0.441917	0.333413	0.587041
M_3yrs_MFC	0.568494	0.659733	0.432036	0.487142	0.646168	0.613323	0.561283	0.44303	0.439585	0.251759	0.536017	0.43778	0.435333	0.337123	0.58691
M_3yrs_M1C	0.561972	0.647747	0.414796	0.482089	0.615843	0.603854	0.583096	0.436454	0.439729	0.302551	0.510449	0.439091	0.429715	0.332769	0.579716
M_3yrs_S1C	0.568473	0.646136	0.426763	0.488536	0.643807	0.620208	0.585308	0.454646	0.437176	0.293851	0.52585	0.443238	0.434416	0.339581	0.579429
M_3yrs_STC	0.566431	0.661046	0.425302	0.487076	0.651717	0.596038	0.585876	0.446797	0.438107	0.294058	0.547542	0.445508	0.439281	0.322331	0.588638
M_3yrs_IPC	0.571352	0.648537	0.421022	0.490865	0.647881	0.619074	0.594429	0.448934	0.439444	0.265283	0.528331	0.438605	0.432079	0.335259	0.588171
M_3yrs_A1C	0.566378	0.654937	0.43035	0.486282	0.640847	0.6069	0.580781	0.439887	0.437278	0.262851	0.519928	0.444699	0.429266	0.327826	0.585876
M_3yrs_CBC	0.579406	0.696667	0.432546	0.485248	0.520017	0.600306	0.521624	0.464618	0.435187	0.290951	0.617151	0.451644	0.430716	0.324192	0.602255
M_3yrs_V1C	0.567848	0.65878	0.422713	0.482331	0.631788	0.631083	0.573968	0.447951	0.441543	0.255504	0.541337	0.436995	0.427622	0.324981	0.576447
M_3yrs_AMY	0.561871	0.654413	0.430992	0.490254	0.64077	0.601947	0.562872	0.444173	0.438929	0.272842	0.517853	0.436038	0.432086	0.329238	0.574863
M_3yrs_VFC	0.571391	0.642596	0.425845	0.493671	0.649126	0.624031	0.578975	0.456133	0.437029	0.263858	0.517941	0.452466	0.435614	0.346836	0.579933
M_3yrs_DFC	0.573432	0.679818	0.429089	0.49758	0.66542	0.623054	0.585401	0.459534	0.442948	0.282507	0.545144	0.444051	0.450214	0.33093	0.581884
M_3yrs_HIP	0.561963	0.640859	0.415698	0.481697	0.614036	0.598059	0.553244	0.444047	0.431383	0.26691	0.523875	0.431495	0.420771	0.316387	0.570253
M_3yrs_ITC	0.572518	0.671639	0.441833	0.487875	0.649754	0.612018	0.563535	0.456132	0.441309	0.25538	0.549263	0.444022	0.441347	0.326071	0.591892
M_4yrs_AMY	0.557712	0.598577	0.423459	0.484821	0.593038	0.618491	0.570388	0.453023	0.44313	0.258094	0.474659	0.442585	0.439035	0.322423	0.562359
M_4yrs_STR	0.549583	0.596226	0.416432	0.48452	0.616689	0.605107	0.564797	0.44485	0.435541	0.275899	0.471106	0.437257	0.429888	0.316075	0.552246
M_4yrs_VFC	0.557147	0.621123	0.433734	0.477369	0.602548	0.614682	0.591542	0.441934	0.440168	0.303757	0.529636	0.439437	0.453868	0.302862	0.579027
M_4yrs_DFC	0.547907	0.585267	0.423976	0.476557	0.586776	0.606998	0.566118	0.448362	0.434932	0.256174	0.481413	0.427662	0.428075	0.331793	0.544135
M_4yrs_STC	0.554518	0.602665	0.424488	0.478604	0.58521	0.590342	0.58247	0.432479	0.439116	0.307365	0.477334	0.435112	0.438836	0.315687	0.567058
M_4yrs_CBC	0.546283	0.596968	0.405825	0.480893	0.531628	0.606329	0.513092	0.440721	0.428755	0.284411	0.518507	0.425739	0.408922	0.332188	0.572137
M_4yrs_MD	0.557689	0.609905	0.416337	0.495365	0.645582	0.642834	0.564764	0.434254	0.451108	0.293082	0.537043	0.435353	0.436207	0.319208	0.585717
M_8yrs_ITC	0.55348	0.609801	0.428978	0.481764	0.612732	0.595965	0.593156	0.43189	0.434728	0.321395	0.511891	0.435693	0.445069	0.30903	0.5789
M_8yrs_S1C	0.55531	0.588233	0.417475	0.479651	0.610407	0.621565	0.58379	0.450344	0.431164	0.309454	0.494116	0.442071	0.440142	0.328632	0.56358
M_8yrs_IPC	0.555846	0.594702	0.399611	0.484365	0.613626	0.610461	0.600731	0.45949	0.43619	0.29793	0.502172	0.43526	0.446713	0.319038	0.576637
M_8yrs_V1C	0.561997	0.622043	0.428711	0.48801	0.628684	0.619594	0.5998	0.445848	0.443219	0.304994	0.533364	0.450551	0.453134	0.321221	0.588736
M_8yrs_STC	0.552077	0.610844	0.428271	0.478807	0.621344	0.603168	0.585712	0.440445	0.440092	0.290612	0.509302	0.439734	0.44651	0.321513	0.569672
M_8yrs_MD	0.564543	0.654943	0.429814	0.503911	0.657715	0.628192	0.52863	0.447179	0.456795	0.302878	0.579374	0.43656	0.444349	0.327078	0.593243
M_8yrs_VFC	0.553739	0.612828	0.42544	0.490131	0.615813	0.611518	0.597133	0.461714	0.436355	0.298898	0.528303	0.441609	0.447974	0.322638	0.561618
M_8yrs_HIP	0.568916	0.659671	0.433745	0.504874	0.625159	0.607531	0.558829	0.462835	0.449921	0.321126	0.559846	0.450703	0.449159	0.32269	0.598199
M_8yrs_AMY	0.566024	0.644011	0.42825	0.489192	0.630514	0.604771	0.574842	0.442017	0.448483	0.313758	0.544128	0.448113	0.442414	0.332458	0.597239
M_8yrs_M1C	0.55444	0.598923	0.425233	0.48699	0.573586	0.597656	0.574162	0.452236	0.434283	0.309536	0.510148	0.43439	0.453352	0.335054	0.575007
M_8yrs_CBC	0.562217	0.624133	0.43702	0.500202	0.554877	0.616464	0.524333	0.465925	0.439951	0.296488	0.529109	0.434793	0.422311	0.342943	0.563468
M_8yrs_DFC	0.565635	0.64612	0.435346	0.492265	0.636303	0.621618	0.587235	0.456239	0.442341	0.287025	0.553031	0.452744	0.452802	0.331327	0.588294
M_8yrs_STR	0.544958	0.591042	0.412656	0.484422	0.626217	0.620568	0.566003	0.428764	0.431123	0.308566	0.503204	0.435707	0.426403	0.33001	0.559722
M_8yrs_A1C	0.560229	0.610652	0.430398	0.492401	0.623675	0.618695	0.567116	0.456617	0.442759	0.29627	0.52845	0.450009	0.450599	0.325224	0.574712
M_8yrs_MFC	0.558376	0.601693	0.414166	0.486923	0.613236	0.609745	0.60561	0.448042	0.447731	0.319923	0.50863	0.439798	0.457536	0.331448	0.579711
M_8yrs_OFC	0.57206	0.652262	0.426388	0.496941	0.64295	0.615173	0.605919	0.471051	0.451021	0.300911	0.5559	0.448499	0.461893	0.333974	0.590908
M_8yrs_MFC.1	0.544155	0.65301	0.392534	0.457591	0.596493	0.584286	0.591915	0.431117	0.425777	0.26552	0.541467	0.43142	0.452663	0.276419	0.566397
M_8yrs_CBC.1	0.591348	0.725996	0.451722	0.510784	0.569553	0.613866	0.556719	0.474324	0.455094	0.282099	0.610545	0.460271	0.46145	0.333488	0.61925
M_8yrs_A1C.1	0.590784	0.733539	0.460162	0.514292	0.668186	0.613624	0.581966	0.470216	0.45932	0.260197	0.570811	0.464041	0.485512	0.314782	0.618719
M_8yrs_VFC.1	0.576801	0.702037	0.443306	0.495744	0.614038	0.603525	0.590857	0.451138	0.454238	0.279699	0.573631	0.460744	0.477925	0.300078	0.592679
M_8yrs_HIP.1	0.572428	0.677953	0.44812	0.497191	0.625137	0.59494	0.570863	0.450254	0.459555	0.287707	0.545015	0.456393	0.466596	0.315174	0.593447
M_8yrs_AMY.1	0.580167	0.698399	0.446558	0.500748	0.65362	0.610597	0.588502	0.464542	0.454862	0.267621	0.552109	0.461766	0.47303	0.304833	0.588246
M_8yrs_V1C.1	0.589761	0.729282	0.461403	0.505235	0.607169	0.611794	0.586868	0.467021	0.45904	0.273149	0.621007	0.455312	0.484586	0.314136	0.602132
M_8yrs_IPC.1	0.581571	0.716194	0.446909	0.496876	0.662768	0.60055	0.591306	0.458829	0.457134	0.279563	0.580619	0.457179	0.482447	0.308534	0.613447
M_8yrs_DFC.1	0.567821	0.690704	0.418139	0.478798	0.648893	0.614325	0.601033	0.436913	0.437705	0.2582	0.579426	0.445281	0.466956	0.304069	0.580715
M_8yrs_STC.1	0.588386	0.728853	0.449794	0.505809	0.659651	0.617358	0.57593	0.461003	0.456788	0.270022	0.595153	0.466538	0.496905	0.310097	0.600844
M_8yrs_ITC.1	0.57537	0.71908	0.451758	0.499723	0.627915	0.576827	0.611774	0.435395	0.456645	0.300263	0.58184	0.456326	0.480119	0.290135	0.614281
F_11yrs_VFC	0.584041	0.691739	0.431265	0.498265	0.647107	0.626651	0.574399	0.461531	0.449114	0.278253	0.575936	0.465379	0.464356	0.297231	0.595584
F_11yrs_IPC	0.58047	0.688887	0.434327	0.49549	0.652704	0.612512	0.578486	0.461	0.45067	0.307842	0.604295	0.455038	0.465613	0.297046	0.602691
F_11yrs_ITC	0.555242	0.64101	0.439299	0.474982	0.622606	0.579763	0.595546	0.426171	0.445973	0.293473	0.52704	0.437264	0.443353	0.283545	0.584776
F_11yrs_STC	0.570234	0.659493	0.421162	0.484335	0.64436	0.605178	0.594204	0.44379	0.447622	0.28814	0.528189	0.448328	0.456486	0.291578	0.596795
F_11yrs_S1C	0.576505	0.687616	0.447573	0.490235	0.645631	0.595896	0.572124	0.448272	0.452513	0.281556	0.558873	0.464257	0.461489	0.285234	0.602676
F_11yrs_DFC	0.585952	0.700486	0.456487	0.496852	0.652182	0.624603	0.572164	0.464434	0.45059	0.278154	0.571863	0.468487	0.46822	0.294245	0.594248
F_11yrs_AMY	0.580962	0.680395	0.444178	0.493401	0.604818	0.620906	0.56357	0.458415	0.453568	0.275675	0.584004	0.459324	0.454112	0.291589	0.601519
F_11yrs_V1C	0.590298	0.702961	0.452248	0.493796	0.653955	0.624083	0.557274	0.468955	0.450641	0.250582	0.580851	0.463959	0.461088	0.300697	0.602475
F_11yrs_CBC	0.579266	0.707904	0.410491	0.487304	0.497308	0.599063	0.515935	0.446926	0.439217	0.228828	0.638936	0.442413	0.427522	0.2931	0.600421
F_11yrs_A1C	0.588494	0.719592	0.440088	0.501423	0.641673	0.605272	0.564853	0.462404	0.456081	0.282228	0.602517	0.464477	0.461615	0.284247	0.613518
F_11yrs_HIP	0.553836	0.603834	0.43516	0.480861	0.61895	0.60734	0.582024	0.424808	0.448839	0.310563	0.496495	0.443637	0.445721	0.293865	0.584592
F_11yrs_M1C	0.582618	0.68629	0.443999	0.49331	0.650283	0.625046	0.556473	0.464667	0.448119	0.277769	0.547154	0.467953	0.462464	0.301932	0.596665
F_11yrs_OFC	0.581094	0.689324	0.431647	0.491317	0.655019	0.601171	0.578018	0.459616	0.44723	0.307566	0.592561	0.46075	0.457999	0.291413	0.59886
F_11yrs_MFC	0.5817	0.697404	0.437818	0.490624	0.648921	0.62088	0.565422	0.459977	0.456026	0.282484	0.561654	0.468538	0.466491	0.295121	0.595222
F_13yrs_MFC	0.581711	0.68749	0.441881	0.494263	0.639545	0.642185	0.577381	0.449905	0.452548	0.275599	0.544562	0.466873	0.461628	0.309872	0.608306
F_13yrs_IPC	0.586673	0.704289	0.446437	0.500381	0.662109	0.637484	0.582503	0.474324	0.447157	0.26264	0.582694	0.475437	0.472852	0.326762	0.599445
F_13yrs_VFC	0.579797	0.697144	0.454487	0.496427	0.651032	0.640161	0.577215	0.468363	0.451342	0.294038	0.574385	0.466408	0.46134	0.310853	0.598622
F_13yrs_A1C	0.588073	0.704394	0.434674	0.496574	0.637875	0.631962	0.567168	0.46384	0.446464	0.273998	0.59273	0.46774	0.468452	0.316152	0.608492
F_13yrs_ITC	0.584775	0.702707	0.448781	0.500896	0.661719	0.652618	0.575303	0.468806	0.446495	0.273947	0.554817	0.470388	0.467162	0.325062	0.594878
F_13yrs_STC	0.581457	0.697715	0.452099	0.501664	0.644745	0.656229	0.58424	0.479039	0.448477	0.281907	0.563043	0.466138	0.467641	0.323909	0.60003
F_13yrs_CBC	0.579665	0.689731	0.42564	0.482557	0.547379	0.616088	0.506035	0.44775	0.438676	0.327111	0.61918	0.449082	0.43188	0.311986	0.597335
F_13yrs_V1C	0.583142	0.680622	0.437025	0.490775	0.650723	0.648667	0.579063	0.468604	0.440159	0.26955	0.567661	0.462586	0.455468	0.317639	0.590251
F_13yrs_S1C	0.584034	0.698999	0.433498	0.499087	0.647241	0.64644	0.576833	0.471344	0.454243	0.304961	0.578657	0.467369	0.475194	0.321772	0.599567
F_13yrs_DFC	0.590379	0.705936	0.452892	0.500791	0.66479	0.640198	0.571604	0.472021	0.453577	0.300044	0.556932	0.471776	0.478542	0.321282	0.609438
F_13yrs_OFC	0.588838	0.699997	0.44159	0.503773	0.658928	0.659485	0.568905	0.469596	0.449522	0.289608	0.582627	0.47476	0.467893	0.319358	0.600124
F_13yrs_MD	0.562675	0.636362	0.422143	0.487127	0.681442	0.648716	0.577777	0.441094	0.437662	0.284391	0.545541	0.438557	0.442882	0.350734	0.592791
F_13yrs_AMY	0.575021	0.68121	0.456468	0.485076	0.642137	0.64905	0.564599	0.441944	0.448438	0.282111	0.538463	0.461322	0.459516	0.307181	0.597391
F_13yrs_M1C	0.587747	0.707422	0.445435	0.500798	0.653488	0.633726	0.56887	0.463128	0.454464	0.279275	0.562124	0.465994	0.477004	0.307685	0.606315
F_13yrs_HIP	0.569529	0.666238	0.439389	0.486309	0.629474	0.626879	0.572041	0.445401	0.441491	0.262687	0.532846	0.45043	0.447075	0.3218	0.592484
F_13yrs_STR	0.56643	0.660721	0.428969	0.487575	0.631606	0.635147	0.547962	0.438571	0.441314	0.322915	0.552494	0.451799	0.436946	0.318738	0.580769
M_15yrs_IPC	0.577852	0.717451	0.447378	0.484944	0.654545	0.601193	0.560119	0.449396	0.448779	0.295464	0.586037	0.459276	0.468055	0.285998	0.60711
M_15yrs_CBC	0.568963	0.681672	0.441797	0.491889	0.523198	0.602459	0.50113	0.458846	0.443832	0.302581	0.611021	0.446887	0.428293	0.332409	0.60113
M_15yrs_STC	0.577496	0.706172	0.445687	0.498312	0.643593	0.603201	0.554311	0.457116	0.451748	0.284258	0.588457	0.456819	0.46514	0.288156	0.605925
M_15yrs_ITC	0.584785	0.71851	0.46079	0.496844	0.649188	0.61546	0.554177	0.449416	0.453581	0.267655	0.585186	0.463565	0.464901	0.293149	0.608521
M_15yrs_AMY	0.584667	0.7118	0.455913	0.495711	0.645974	0.614286	0.570752	0.442326	0.461367	0.307729	0.577429	0.466022	0.469166	0.2974	0.60604
M_18yrs_HIP	0.563119	0.63141	0.409067	0.485089	0.599062	0.612322	0.539151	0.444111	0.431325	0.269855	0.523238	0.432603	0.434978	0.32588	0.577908
M_18yrs_M1C	0.562517	0.626903	0.428417	0.481673	0.612556	0.627707	0.575707	0.448981	0.433974	0.256231	0.510961	0.44078	0.435766	0.337739	0.564255
M_18yrs_V1C	0.568483	0.656096	0.429255	0.484466	0.616254	0.618204	0.595621	0.440396	0.446709	0.292161	0.550644	0.447709	0.447734	0.314498	0.580383
M_18yrs_A1C	0.560117	0.628193	0.426623	0.482526	0.613029	0.612463	0.578545	0.444862	0.429087	0.273617	0.514361	0.434442	0.422545	0.329946	0.568455
M_18yrs_ITC	0.572002	0.647397	0.422245	0.482362	0.624289	0.623415	0.588711	0.443841	0.44561	0.273266	0.545433	0.446566	0.455986	0.32851	0.589698
M_18yrs_VFC	0.576259	0.661158	0.426281	0.491255	0.630078	0.630534	0.587776	0.463168	0.448735	0.305471	0.559074	0.45714	0.455737	0.321879	0.58271
M_18yrs_MFC	0.567089	0.640796	0.434105	0.480244	0.620679	0.618312	0.57642	0.440779	0.433572	0.275559	0.532802	0.444714	0.430699	0.328162	0.568552
M_18yrs_STC	0.562231	0.63612	0.427488	0.483158	0.614602	0.628386	0.58043	0.454679	0.430907	0.283621	0.527291	0.43551	0.437131	0.333808	0.572159
M_18yrs_DFC	0.578334	0.680659	0.445492	0.497313	0.636566	0.632122	0.591416	0.456235	0.454462	0.318735	0.575819	0.460698	0.461749	0.317359	0.599209
M_18yrs_S1C	0.567673	0.630765	0.420465	0.485272	0.613736	0.647318	0.581228	0.462088	0.433212	0.262439	0.520732	0.442298	0.433043	0.34533	0.569052
M_18yrs_IPC	0.570677	0.660773	0.424963	0.494195	0.627463	0.642916	0.587799	0.454099	0.443176	0.288517	0.538169	0.4536	0.459524	0.331419	0.582252
M_18yrs_OFC	0.571449	0.648605	0.436195	0.487106	0.636811	0.642209	0.606135	0.464922	0.440083	0.325821	0.539668	0.454403	0.451692	0.327154	0.579987
M_18yrs_CBC	0.569128	0.649688	0.430672	0.482799	0.534253	0.625586	0.556284	0.465625	0.43538	0.296971	0.573639	0.450636	0.432458	0.330331	0.580165
F_19yrs_STC	0.593809	0.716998	0.453877	0.510572	0.657538	0.651736	0.56061	0.476493	0.45678	0.251162	0.598171	0.473236	0.476379	0.318086	0.612945
F_19yrs_CBC	0.58294	0.68788	0.434325	0.492188	0.549348	0.651476	0.530133	0.460115	0.449639	0.299348	0.609142	0.452575	0.443477	0.327292	0.600743
F_19yrs_DFC	0.590406	0.703005	0.448312	0.509276	0.655318	0.64235	0.552822	0.479824	0.452605	0.274844	0.565464	0.467296	0.472913	0.328172	0.602904
F_19yrs_AMY	0.584055	0.667398	0.435155	0.508389	0.647578	0.680157	0.556505	0.473629	0.457057	0.266626	0.548331	0.466178	0.462373	0.338519	0.589367
F_19yrs_OFC	0.590652	0.699722	0.440792	0.513215	0.652674	0.645823	0.554422	0.477548	0.46216	0.282203	0.573004	0.471945	0.472246	0.314954	0.60238
F_19yrs_ITC	0.585692	0.684319	0.435779	0.502755	0.659881	0.652595	0.56725	0.470933	0.453735	0.251753	0.561731	0.472322	0.469624	0.334248	0.593858
F_19yrs_STR	0.579511	0.691824	0.436186	0.499479	0.643061	0.6169	0.521817	0.435538	0.452623	0.296132	0.587586	0.457583	0.453902	0.305893	0.605099
F_19yrs_S1C	0.589257	0.705228	0.458346	0.500455	0.639792	0.641305	0.556479	0.46778	0.454285	0.258557	0.571943	0.46794	0.468683	0.308096	0.604917
F_19yrs_M1C	0.586204	0.684461	0.447804	0.505527	0.633644	0.647479	0.551917	0.485719	0.455742	0.285904	0.543782	0.466855	0.472502	0.327434	0.604553
F_19yrs_HIP	0.589766	0.686423	0.430563	0.506456	0.630761	0.672088	0.550317	0.464223	0.458312	0.264329	0.54422	0.46051	0.469222	0.321493	0.60132
F_19yrs_A1C	0.589623	0.692483	0.459579	0.490771	0.623732	0.628446	0.561071	0.456421	0.45073	0.284293	0.592835	0.465025	0.467123	0.301679	0.604995
F_19yrs_V1C	0.592979	0.707531	0.442849	0.499106	0.660818	0.660361	0.556636	0.482898	0.454714	0.24375	0.582809	0.464691	0.454694	0.318064	0.605486
F_19yrs_IPC	0.592496	0.714141	0.45043	0.496757	0.645496	0.630334	0.561112	0.46429	0.457248	0.273148	0.608232	0.47145	0.478003	0.304975	0.611818
F_19yrs_VFC	0.592718	0.69279	0.452731	0.506699	0.654051	0.658519	0.553853	0.476424	0.448385	0.245991	0.561334	0.473144	0.46914	0.326351	0.606112
F_19yrs_MFC	0.587726	0.701078	0.445072	0.502036	0.647805	0.647501	0.54039	0.464181	0.456813	0.270405	0.575369	0.467959	0.470826	0.305211	0.603829
F_19yrs_MD	0.583848	0.670602	0.441621	0.514138	0.660272	0.67059	0.51865	0.4598	0.459616	0.273166	0.565716	0.449496	0.456857	0.322869	0.614763
F_21yrs_MFC	0.586428	0.721638	0.448312	0.493896	0.657329	0.608318	0.587392	0.452836	0.456582	0.281986	0.580489	0.463738	0.483044	0.296879	0.617816
F_21yrs_M1C	0.595359	0.731112	0.458906	0.510702	0.645622	0.612964	0.565998	0.468789	0.45521	0.30213	0.628807	0.467607	0.477411	0.306017	0.618175
F_21yrs_A1C	0.589645	0.725398	0.461526	0.508477	0.654505	0.607429	0.572697	0.469033	0.462184	0.274508	0.595719	0.4693	0.473724	0.300751	0.617866
F_21yrs_DFC	0.583161	0.727928	0.437741	0.49873	0.654131	0.615315	0.553456	0.463796	0.451818	0.280283	0.589727	0.466778	0.472011	0.301592	0.612518
F_21yrs_AMY	0.58233	0.702412	0.456667	0.500467	0.654252	0.606677	0.568782	0.456891	0.459268	0.309982	0.582141	0.46758	0.47059	0.305212	0.611951
F_21yrs_MD	0.577257	0.69024	0.438813	0.502041	0.652886	0.632478	0.507794	0.443926	0.451971	0.32757	0.611808	0.444589	0.45013	0.30965	0.616105
F_21yrs_V1C	0.591306	0.732325	0.451801	0.503579	0.654318	0.604117	0.570807	0.468806	0.457575	0.298786	0.618873	0.469451	0.464487	0.290135	0.609349
F_21yrs_STC	0.590103	0.734009	0.452028	0.503497	0.658155	0.611546	0.570911	0.465702	0.456124	0.29226	0.59352	0.472965	0.476582	0.308909	0.618954
F_21yrs_VFC	0.585908	0.739703	0.454997	0.497316	0.652056	0.606897	0.571701	0.453856	0.45455	0.294976	0.60484	0.46157	0.478339	0.289834	0.613111
F_21yrs_CBC	0.585419	0.726594	0.447724	0.505641	0.541222	0.603335	0.540848	0.461675	0.455779	0.344697	0.64183	0.45818	0.451079	0.306507	0.61972
F_21yrs_S1C	0.595175	0.739328	0.451144	0.50369	0.661052	0.607778	0.570682	0.463361	0.463454	0.287011	0.605016	0.471927	0.474401	0.295149	0.615439
F_21yrs_ITC	0.585132	0.713871	0.45604	0.504724	0.647404	0.608862	0.571608	0.456555	0.460994	0.31278	0.589812	0.462534	0.468532	0.300277	0.611385
F_21yrs_IPC	0.59278	0.734466	0.447649	0.505978	0.662792	0.604995	0.574724	0.456517	0.458699	0.295189	0.631031	0.465411	0.472081	0.299606	0.618793
F_21yrs_HIP	0.577269	0.682581	0.443445	0.503217	0.629188	0.610958	0.584916	0.458156	0.459185	0.34082	0.558268	0.451194	0.464343	0.323359	0.608274
F_21yrs_STR	0.570098	0.659226	0.437801	0.497739	0.633201	0.6064	0.570347	0.439248	0.442742	0.333688	0.539016	0.448576	0.456672	0.321202	0.585345
F_21yrs_OFC	0.58447	0.718681	0.459694	0.498527	0.655536	0.596008	0.579374	0.459141	0.455211	0.277906	0.601223	0.463431	0.472858	0.302145	0.618738
M_23yrs_ITC	0.578045	0.70395	0.442922	0.492159	0.64384	0.619992	0.576265	0.457518	0.452514	0.296012	0.572112	0.462952	0.46135	0.3096	0.602924
M_23yrs_AMY	0.571366	0.668342	0.437826	0.493977	0.647701	0.63424	0.560533	0.452513	0.454645	0.272916	0.539833	0.453557	0.440726	0.333179	0.596021
M_23yrs_OFC	0.576703	0.702158	0.454058	0.488548	0.654902	0.615698	0.561375	0.449574	0.450334	0.297106	0.595109	0.463299	0.457552	0.314982	0.596357
M_23yrs_MD	0.564289	0.643911	0.421099	0.488082	0.669921	0.638469	0.568667	0.435436	0.445451	0.285503	0.548577	0.438547	0.417571	0.337945	0.592697
M_23yrs_STC	0.5833	0.700683	0.458157	0.500136	0.661629	0.630741	0.577585	0.457553	0.450618	0.285588	0.564727	0.460018	0.459568	0.311397	0.606153
M_23yrs_VFC	0.581119	0.69981	0.455533	0.498804	0.645204	0.62834	0.568885	0.467627	0.455768	0.254224	0.579788	0.460786	0.467037	0.311623	0.600634
M_23yrs_MFC	0.579321	0.710326	0.444982	0.495572	0.651871	0.621345	0.570826	0.461372	0.455571	0.249269	0.596978	0.459596	0.464617	0.299789	0.601932
M_23yrs_M1C	0.579882	0.701583	0.449898	0.494952	0.643248	0.636861	0.575012	0.456657	0.451709	0.273482	0.594625	0.460509	0.462389	0.308479	0.60707
M_23yrs_HIP	0.575684	0.670188	0.436722	0.493891	0.634765	0.62454	0.55956	0.447245	0.450623	0.289049	0.551039	0.448081	0.455158	0.331135	0.59864
M_23yrs_CBC	0.573833	0.669968	0.4395	0.495389	0.565046	0.619448	0.543667	0.471855	0.443477	0.301704	0.589491	0.450599	0.432002	0.331585	0.593391
M_23yrs_S1C	0.571286	0.694325	0.456553	0.493598	0.651574	0.619677	0.582197	0.454583	0.450745	0.301755	0.555687	0.462819	0.460871	0.305589	0.600279
M_23yrs_A1C	0.578232	0.69644	0.443402	0.489949	0.646856	0.625354	0.571028	0.452877	0.456689	0.302053	0.587568	0.452957	0.458423	0.313039	0.597715
M_23yrs_IPC	0.583618	0.708056	0.456249	0.503353	0.644604	0.620719	0.581273	0.461011	0.459922	0.335307	0.604378	0.464039	0.464875	0.305689	0.608516
M_23yrs_STR	0.560152	0.668508	0.417356	0.490759	0.651516	0.618453	0.577471	0.439713	0.438764	0.307731	0.552685	0.444783	0.427179	0.32187	0.581166
F_30yrs_ITC	0.58032	0.687369	0.438918	0.495404	0.639337	0.64947	0.536879	0.480278	0.446696	0.262525	0.569483	0.466979	0.462308	0.32483	0.600548
F_30yrs_STR	0.564852	0.631687	0.438939	0.491983	0.608346	0.65029	0.549375	0.455324	0.44222	0.28593	0.511719	0.455765	0.442634	0.332878	0.576715
F_30yrs_MFC	0.587283	0.690374	0.44619	0.493032	0.643552	0.666824	0.556163	0.482429	0.449465	0.253948	0.573906	0.468171	0.473452	0.330464	0.599824
F_30yrs_OFC	0.584746	0.692608	0.450308	0.50079	0.655373	0.663392	0.556636	0.485531	0.448562	0.22945	0.567985	0.468774	0.469968	0.32973	0.59953
F_30yrs_IPC	0.591559	0.690578	0.455081	0.498259	0.64375	0.648217	0.566669	0.473603	0.450999	0.272249	0.557364	0.470019	0.469282	0.326639	0.605499
F_30yrs_STC	0.584368	0.694981	0.442808	0.490546	0.646118	0.655958	0.558215	0.480147	0.453252	0.257064	0.586608	0.469494	0.470304	0.318608	0.600623
F_30yrs_S1C	0.587107	0.689262	0.450657	0.497191	0.641179	0.659122	0.56105	0.480193	0.454585	0.247675	0.55753	0.464071	0.463837	0.329063	0.601007
F_30yrs_MD	0.570216	0.649091	0.404934	0.500085	0.625925	0.667949	0.50319	0.453028	0.443171	0.270458	0.540778	0.44979	0.450698	0.325862	0.598504
F_30yrs_HIP	0.579818	0.668986	0.434728	0.504459	0.612097	0.654232	0.55651	0.467629	0.449812	0.262	0.544215	0.463329	0.468562	0.329565	0.599373
F_30yrs_A1C	0.577145	0.655407	0.425598	0.493562	0.643373	0.660305	0.576775	0.486751	0.444072	0.232729	0.519718	0.46753	0.459364	0.3476	0.587885
F_30yrs_V1C	0.589107	0.696602	0.447328	0.497788	0.631518	0.665981	0.564636	0.479239	0.451623	0.243976	0.59083	0.466476	0.463407	0.323328	0.597735
F_30yrs_DFC	0.581108	0.689292	0.442701	0.489243	0.644023	0.633802	0.551861	0.466534	0.451714	0.247404	0.567811	0.469596	0.466647	0.316101	0.604936
F_30yrs_AMY	0.574181	0.669405	0.439755	0.499236	0.620983	0.647468	0.561136	0.457644	0.449479	0.269994	0.562241	0.461806	0.45526	0.321409	0.599064
F_30yrs_M1C	0.585812	0.686526	0.444674	0.498836	0.640098	0.656589	0.557151	0.4767	0.446216	0.242178	0.55594	0.466016	0.469948	0.325103	0.603768
F_30yrs_VFC	0.580356	0.660789	0.438663	0.490707	0.635712	0.653692	0.5659	0.474178	0.440488	0.230082	0.531329	0.464383	0.461354	0.336493	0.598243
F_30yrs_CBC	0.57072	0.669044	0.427209	0.491815	0.534524	0.642481	0.496234	0.468406	0.440521	0.289168	0.589237	0.446665	0.439275	0.332926	0.596167
M_36yrs_M1C	0.590709	0.697428	0.442214	0.498004	0.6055	0.656069	0.536897	0.475478	0.448096	0.232017	0.58144	0.471953	0.466067	0.31745	0.607405
M_36yrs_STC	0.588752	0.70572	0.448924	0.501288	0.645734	0.655001	0.543218	0.475266	0.460604	0.249473	0.593912	0.465472	0.463291	0.312522	0.619576
M_36yrs_MFC	0.588597	0.703971	0.453348	0.497939	0.630322	0.659336	0.527884	0.471278	0.450042	0.242803	0.595169	0.472201	0.458277	0.314769	0.606091
M_36yrs_ITC	0.582379	0.701048	0.439814	0.49849	0.628316	0.639604	0.563629	0.458824	0.453559	0.271095	0.569615	0.463877	0.477972	0.320304	0.60843
M_36yrs_IPC	0.593329	0.721337	0.451132	0.504295	0.64708	0.645904	0.555414	0.472119	0.449128	0.222995	0.617214	0.472478	0.466973	0.302015	0.611003
M_36yrs_AMY	0.587687	0.683472	0.45335	0.508929	0.637979	0.656159	0.556161	0.465569	0.457512	0.26602	0.552095	0.466543	0.463709	0.333376	0.610262
M_36yrs_OFC	0.595568	0.713055	0.457212	0.503544	0.632258	0.651432	0.538082	0.46852	0.452466	0.268538	0.597136	0.471432	0.461436	0.303824	0.622981
M_36yrs_VFC	0.593936	0.71877	0.465124	0.496921	0.634695	0.642878	0.543588	0.466144	0.448297	0.251339	0.620942	0.471648	0.46317	0.300989	0.613305
M_36yrs_DFC	0.59368	0.725467	0.456889	0.506051	0.647424	0.625375	0.545106	0.472858	0.457368	0.243304	0.620051	0.469491	0.476886	0.304535	0.618061
M_36yrs_A1C	0.594117	0.720907	0.468719	0.508418	0.652267	0.642276	0.525564	0.463381	0.457525	0.222322	0.625588	0.467703	0.469238	0.304091	0.614624
M_36yrs_V1C	0.593021	0.716394	0.460645	0.499758	0.652395	0.652232	0.544814	0.471617	0.456125	0.270861	0.597019	0.474212	0.463896	0.298592	0.614061
M_36yrs_CBC	0.579074	0.697713	0.431258	0.494232	0.517059	0.639402	0.515774	0.460582	0.446403	0.290099	0.622384	0.456428	0.441627	0.32627	0.60771
M_36yrs_S1C	0.593804	0.715173	0.455713	0.505473	0.625178	0.660003	0.55118	0.470394	0.454066	0.219466	0.595817	0.472578	0.467682	0.304846	0.609001
M_36yrs_HIP	0.582101	0.674782	0.449523	0.502244	0.597207	0.646454	0.548449	0.458495	0.463078	0.284304	0.555288	0.458764	0.467044	0.324005	0.610994
M_36yrs_STR	0.572136	0.664831	0.437197	0.492387	0.634957	0.629127	0.547439	0.444215	0.448224	0.31073	0.538974	0.454402	0.443943	0.325858	0.593292
M_36yrs_MD	0.578827	0.653021	0.431436	0.505604	0.621155	0.667693	0.516832	0.461492	0.455393	0.317316	0.561989	0.449334	0.447553	0.332907	0.609285
M_37yrs_S1C	0.593257	0.683587	0.44817	0.499394	0.624366	0.664688	0.561046	0.48259	0.453474	0.25521	0.589108	0.465739	0.463239	0.342126	0.606186
M_37yrs_V1C	0.588384	0.686052	0.440322	0.498055	0.639974	0.639284	0.562088	0.460885	0.450743	0.257365	0.579316	0.465795	0.451462	0.319443	0.600928
M_37yrs_CBC	0.555754	0.617393	0.420352	0.479846	0.53424	0.624851	0.553154	0.458127	0.436387	0.275766	0.5464	0.437157	0.429409	0.340745	0.56988
M_37yrs_HIP	0.588777	0.698798	0.440291	0.503948	0.631666	0.645843	0.528741	0.453253	0.456232	0.306788	0.582311	0.463841	0.460668	0.314203	0.60924
M_37yrs_IPC	0.580854	0.691248	0.448929	0.503118	0.636785	0.634905	0.561313	0.466265	0.456304	0.295914	0.568586	0.461645	0.469852	0.330978	0.607822
M_37yrs_MD	0.585476	0.677665	0.435038	0.514798	0.646091	0.666146	0.514761	0.459713	0.458816	0.292756	0.578542	0.455058	0.456812	0.339095	0.609533
M_37yrs_DFC	0.593146	0.713482	0.450968	0.50527	0.626208	0.645513	0.536557	0.454157	0.458303	0.277599	0.604594	0.465657	0.4622	0.307843	0.619219
M_37yrs_VFC	0.594983	0.710044	0.460086	0.503988	0.655199	0.654202	0.535297	0.470035	0.454782	0.294889	0.59251	0.469711	0.45917	0.32332	0.617187
M_37yrs_ITC	0.57964	0.702464	0.452731	0.496203	0.63091	0.620328	0.554921	0.452488	0.461424	0.306321	0.587984	0.455762	0.459763	0.294543	0.612137
M_37yrs_A1C	0.592387	0.724054	0.456662	0.507942	0.642113	0.634805	0.56022	0.477781	0.460275	0.284656	0.585155	0.4696	0.474729	0.330589	0.618778
M_37yrs_M1C	0.596027	0.716026	0.45991	0.501032	0.648648	0.647779	0.553535	0.46672	0.451915	0.289246	0.586251	0.469739	0.466776	0.321778	0.615835
M_37yrs_OFC	0.596476	0.713255	0.45863	0.504805	0.651179	0.647255	0.546946	0.472524	0.457231	0.282772	0.588115	0.472874	0.473024	0.332315	0.613822
M_37yrs_STR	0.570967	0.647709	0.414025	0.492866	0.602141	0.64811	0.54246	0.447877	0.444147	0.28583	0.559855	0.445286	0.432652	0.328906	0.586621
M_37yrs_STC	0.59559	0.710024	0.451136	0.5127	0.660005	0.664733	0.55835	0.488491	0.459361	0.274985	0.569887	0.469768	0.478236	0.34446	0.606057
M_37yrs_AMY	0.582299	0.676588	0.446948	0.504736	0.62534	0.643597	0.567598	0.45722	0.457532	0.290016	0.568556	0.460075	0.453296	0.345472	0.615185
M_37yrs_MFC	0.585167	0.701861	0.453038	0.489096	0.616084	0.605963	0.564745	0.437081	0.455311	0.308651	0.589855	0.453686	0.448152	0.280485	0.63012
F_40yrs_DFC	0.561687	0.624568	0.430294	0.477786	0.611842	0.614259	0.582535	0.454334	0.436551	0.265896	0.516649	0.451205	0.448453	0.319897	0.580526
F_40yrs_ITC	0.572941	0.678301	0.444565	0.482336	0.627734	0.614775	0.568967	0.454848	0.445251	0.265861	0.554908	0.457857	0.449538	0.301553	0.600726
F_40yrs_VFC	0.582902	0.710591	0.447104	0.492482	0.63995	0.610532	0.563262	0.459302	0.450065	0.309874	0.612628	0.463807	0.468347	0.289185	0.607953
F_40yrs_MD	0.560948	0.633834	0.412004	0.484126	0.635688	0.610547	0.573253	0.435029	0.44296	0.269317	0.545921	0.436091	0.426948	0.325027	0.602203
F_40yrs_AMY	0.5582	0.612772	0.423811	0.477405	0.623994	0.6106	0.60091	0.443405	0.445587	0.286518	0.513729	0.441317	0.435085	0.313207	0.562178
F_40yrs_A1C	0.562552	0.622124	0.425046	0.483779	0.601932	0.61879	0.582612	0.46144	0.438348	0.244787	0.525383	0.44719	0.44638	0.321447	0.568198
F_40yrs_CBC	0.546886	0.594171	0.41228	0.464678	0.495121	0.607734	0.498969	0.438014	0.422344	0.25921	0.520019	0.421292	0.408456	0.319289	0.556417
F_40yrs_V1C	0.580841	0.685198	0.444827	0.489942	0.614939	0.635893	0.582581	0.475907	0.443614	0.286287	0.582339	0.462828	0.448837	0.302684	0.593071
F_40yrs_OFC	0.582708	0.71484	0.446382	0.493773	0.646424	0.606203	0.564639	0.457937	0.450338	0.254047	0.596153	0.465449	0.463423	0.287146	0.611992
F_40yrs_STC	0.582984	0.702281	0.443391	0.491839	0.645514	0.618437	0.57848	0.459272	0.450843	0.255175	0.60487	0.463246	0.461153	0.296751	0.602425
F_40yrs_IPC	0.58651	0.716718	0.442965	0.496114	0.640901	0.608911	0.566903	0.458404	0.452748	0.26394	0.581399	0.462825	0.461552	0.290931	0.604315
F_40yrs_M1C	0.553366	0.603806	0.405397	0.471904	0.58195	0.617424	0.578151	0.448382	0.427941	0.222875	0.499189	0.443581	0.440345	0.307131	0.560513
F_40yrs_HIP	0.556889	0.611325	0.433168	0.4664	0.589758	0.583733	0.5967	0.43085	0.438611	0.277678	0.502259	0.443726	0.442998	0.309523	0.580751
F_40yrs_STR	0.567921	0.641276	0.427022	0.485803	0.631665	0.609239	0.572668	0.43687	0.443472	0.278028	0.521527	0.450496	0.431573	0.321263	0.5727
F_40yrs_S1C	0.559989	0.621984	0.426143	0.476302	0.602003	0.613025	0.577561	0.449843	0.432068	0.257985	0.534585	0.44621	0.445777	0.300656	0.578872

## Sheet: P_Value
	IQ	ASD	TS	Neuroticism	ADHD	OCD	ANO	PanicDisorder	BIP	MDD	SZes	SZgw	Epilepsy	AD	PD
M_8pcw_Ocx	1.69797e-110	4.71585e-66	6.84054e-21	2.65615e-103	1.73676e-06	0.00492342	4.49282e-20	3.05755e-10	3.0539e-39	4.0139e-103	3.74654e-08	1.64989e-105	1.55119e-25	6.58143e-48	2.66152e-22
M_8pcw_M1C.S1C	3.2426e-117	5.5847e-79	2.17653e-21	2.46634e-103	2.07919e-06	0.00173572	4.32647e-21	2.95068e-11	2.45068e-40	7.24607e-104	1.58493e-09	5.17154e-113	1.73283e-25	3.23449e-47	5.01333e-23
M_8pcw_AMY	1.70806e-120	9.33699e-78	2.03089e-19	1.28597e-108	1.6483e-07	0.000967984	7.62047e-22	7.32025e-14	2.31913e-40	4.73736e-113	2.02984e-09	7.74128e-118	8.32507e-29	3.81468e-46	4.44225e-23
M_8pcw_MGE	3.14591e-116	5.82613e-74	1.89738e-19	1.1036e-107	6.88235e-07	0.000589824	2.18453e-20	1.05135e-13	2.59802e-40	2.90728e-110	6.67089e-09	1.80929e-112	2.52502e-27	2.02973e-45	1.71734e-22
M_8pcw_STC	1.89448e-119	5.05991e-81	2.74952e-22	1.55731e-107	7.13497e-07	0.000479808	6.49152e-21	2.25781e-12	5.61558e-42	8.177e-111	2.01199e-09	1.80768e-115	6.25551e-29	4.05174e-51	3.34566e-24
M_8pcw_URL	1.82687e-125	3.32319e-83	8.57627e-22	3.84983e-109	3.29785e-08	0.00032312	3.42897e-23	2.04076e-11	1.0335e-40	1.48897e-113	1.26698e-09	1.74881e-115	8.48331e-30	5.65415e-57	4.05733e-24
M_8pcw_CGE	2.58331e-116	6.29383e-76	8.98371e-21	3.71733e-108	7.74655e-07	0.00113498	2.57277e-20	4.9319e-13	6.26361e-40	7.55145e-111	5.99297e-09	5.49878e-114	2.75514e-25	1.49936e-46	3.93441e-22
M_8pcw_DTH	3.93983e-116	2.29713e-73	2.65098e-20	6.62609e-107	2.05685e-07	0.00055421	7.34037e-21	7.56315e-11	8.38455e-40	1.53952e-108	8.94534e-09	8.55834e-108	6.55309e-27	1.59661e-45	3.99513e-23
M_8pcw_MFC	4.60881e-110	1.453e-65	2.9972e-21	6.43155e-103	3.17622e-06	0.000974514	7.67922e-20	1.90401e-11	2.40928e-40	4.22255e-104	1.64245e-07	7.01505e-106	9.26265e-26	1.40682e-50	2.95184e-22
M_8pcw_DFC	2.93735e-103	1.29071e-58	1.10731e-19	1.12827e-97	2.51258e-06	0.00159206	1.0439e-19	1.13846e-10	2.83102e-39	3.04998e-98	4.05358e-07	2.9541e-102	2.48493e-24	4.87685e-49	5.81969e-21
M_8pcw_OFC	1.4329e-104	1.73669e-56	9.84799e-20	1.71799e-99	1.01474e-06	9.1559e-05	3.08401e-19	5.72591e-12	4.68892e-39	3.65912e-102	8.60133e-07	6.03935e-101	3.04098e-26	2.1197e-55	2.84328e-22
M_8pcw_LGE	1.0004e-119	6.08688e-82	3.30616e-21	1.36036e-108	2.96974e-07	0.0011452	2.96665e-21	1.46414e-13	3.71949e-40	5.25444e-113	2.82666e-09	2.93955e-117	4.53059e-28	2.0072e-46	7.05784e-23
M_8pcw_ITC	1.4985e-122	6.03567e-82	2.92847e-21	2.52079e-110	2.31699e-07	0.000604746	6.67145e-22	2.77408e-13	4.71931e-41	8.35484e-115	5.38255e-10	7.07237e-119	8.90525e-29	1.18364e-46	1.03056e-23
M_8pcw_HIP	6.23613e-112	2.13497e-65	2.61083e-20	3.33681e-102	6.05546e-07	0.00026281	2.34736e-20	2.26957e-10	1.03358e-37	2.25767e-107	1.97697e-07	5.98135e-106	9.40278e-25	4.72367e-51	1.48487e-22
M_8pcw_VFC	3.60692e-115	6.69582e-70	2.55097e-21	3.10125e-106	1.31289e-06	0.00130435	5.11868e-20	3.75996e-12	1.76704e-41	4.75627e-108	2.03838e-08	4.4399e-110	2.81196e-27	1.7353e-48	1.66195e-23
M_8pcw_PCx	1.71205e-114	7.85938e-77	3.01152e-22	4.20914e-104	2.23346e-06	0.000657148	1.74125e-20	2.4691e-11	5.76598e-43	2.01246e-103	5.79335e-09	9.2972e-115	2.18014e-26	5.50784e-48	1.59381e-23
M_9pcw_DFC	2.61971e-116	3.01047e-81	1.94648e-20	8.10544e-100	2.06569e-06	0.00198543	8.31904e-22	1.22134e-10	2.53985e-40	5.72338e-102	1.84164e-09	9.25044e-115	1.24498e-24	6.87663e-47	5.31516e-23
M_9pcw_MFC	5.03975e-119	2.75109e-81	1.54362e-21	3.0565e-102	1.92764e-06	0.00172499	1.08702e-22	1.90077e-11	1.3643e-39	8.3897e-103	2.08765e-09	1.38295e-114	1.39846e-26	4.71193e-49	1.10654e-23
M_9pcw_AMY	1.07191e-120	4.30396e-84	5.21151e-21	1.06191e-109	3.92917e-07	0.000722402	1.2205e-21	5.15454e-14	4.56791e-40	4.51267e-113	7.78452e-10	1.69819e-121	5.36376e-29	7.53537e-43	1.11363e-24
M_9pcw_DTH	4.27325e-125	5.36459e-85	3.69817e-20	3.88227e-110	1.83745e-08	0.000208669	6.87157e-22	9.35595e-10	6.84582e-39	7.88405e-111	6.24799e-10	1.3917e-116	1.23781e-28	7.0066e-48	1.76574e-25
M_9pcw_URL	5.10638e-127	4.01297e-89	6.03728e-21	2.79326e-109	2.39255e-08	0.000122157	3.17932e-23	3.25101e-11	9.30536e-40	5.74276e-115	2.4108e-10	3.02578e-116	3.52811e-31	1.79461e-57	5.2586e-27
M_9pcw_LGE	9.63006e-118	4.38945e-80	1.48912e-19	5.11705e-103	4.6465e-07	0.00305196	2.74613e-22	1.77651e-12	7.93274e-39	8.1266e-106	5.7274e-09	1.06511e-117	5.03849e-25	5.5958e-41	4.14161e-22
M_9pcw_M1C.S1C	1.01053e-114	5.4832e-78	1.02411e-20	9.67715e-100	2.04722e-06	0.00208941	2.83668e-22	9.21233e-10	2.59107e-38	3.35087e-101	8.84709e-09	1.20023e-110	2.58148e-23	6.42124e-45	9.31539e-22
M_9pcw_MGE	3.49096e-122	5.75639e-85	3.13599e-20	3.75286e-109	6.21123e-07	0.000726759	2.04553e-22	7.01179e-13	2.82682e-39	6.46544e-113	2.51239e-09	3.60844e-117	3.18576e-27	1.90833e-41	3.22399e-24
M_9pcw_TCx	2.00086e-124	1.03552e-89	4.8799e-22	1.2152e-109	1.17141e-06	0.00116849	1.63081e-21	1.25536e-10	1.04288e-39	3.93703e-109	2.2e-10	1.0266e-116	2.34725e-27	2.14788e-49	1.00305e-24
M_9pcw_HIP	4.62136e-120	4.8845e-82	2.91699e-21	5.16529e-106	6.84045e-07	0.000756651	4.29068e-22	8.51202e-10	1.11674e-39	8.28324e-108	2.63916e-09	7.40681e-116	1.6498e-27	9.20013e-54	2.11558e-24
M_9pcw_Ocx	1.18361e-120	4.86669e-85	6.91548e-22	4.64836e-108	1.44114e-06	0.00100862	2.85641e-21	2.97347e-10	4.301e-40	8.82058e-107	1.17268e-09	2.54533e-115	8.80084e-27	1.10316e-49	9.53191e-24
M_9pcw_CGE	4.6645e-117	4.90294e-77	6.31831e-20	3.91973e-108	1.22748e-06	0.000369287	5.72615e-21	4.91379e-13	3.32256e-39	1.37602e-110	7.91383e-09	3.21226e-113	1.66748e-25	2.78695e-43	4.8121e-23
M_9pcw_OFC	3.55642e-117	4.35876e-82	2.58887e-21	1.18077e-104	1.50804e-06	0.00153147	7.15591e-22	9.96389e-11	5.38796e-40	2.24044e-101	2.65459e-09	1.27053e-115	1.79914e-27	3.76977e-53	2.38849e-23
M_9pcw_PCx	5.76508e-122	2.54686e-86	2.48476e-21	1.68056e-105	1.2778e-06	0.000664659	3.12459e-21	8.21262e-11	6.47156e-41	4.39654e-106	6.9225e-10	2.06122e-116	1.05082e-27	4.91027e-48	4.88242e-24
F_12pcw_HIP	2.53934e-117	1.78262e-73	4.93638e-20	2.58144e-99	4.30564e-07	0.000603197	4.72518e-22	1.35941e-11	2.18318e-39	3.88161e-106	3.97575e-09	6.64987e-112	1.03342e-28	8.2912e-49	5.88409e-24
F_12pcw_DTH	2.43505e-125	6.88555e-85	6.18281e-19	1.28164e-103	3.72768e-08	0.00176202	4.28194e-23	1.51044e-12	4.48852e-41	6.96399e-108	1.09794e-09	7.74871e-125	2.87424e-29	3.41598e-50	3.24502e-22
F_12pcw_AMY	2.36884e-117	1.90474e-76	5.44843e-20	2.81448e-105	5.73523e-07	0.000756417	2.54605e-21	6.54071e-13	9.08956e-40	1.55e-110	4.22983e-09	5.96075e-118	5.33549e-27	4.62148e-44	6.79408e-23
F_12pcw_A1C	3.96514e-128	2.22405e-87	1.68564e-21	2.81711e-101	8.11057e-08	0.00180041	6.63797e-23	8.54125e-11	8.32833e-38	1.31422e-101	2.45678e-10	4.04896e-119	1.89963e-30	1.29121e-47	2.67657e-23
F_12pcw_V1C	1.55378e-125	1.30331e-85	8.44022e-22	5.16825e-100	3.38335e-07	0.000607909	1.39977e-23	2.68424e-10	1.72633e-37	1.45678e-102	5.22748e-09	2.08598e-116	2.27647e-29	1.12594e-54	1.02816e-23
F_12pcw_MFC	6.47553e-127	4.11013e-91	3.40755e-24	1.81618e-102	4.14313e-07	0.000702361	1.58241e-22	5.00074e-10	8.18435e-39	5.74082e-103	2.32442e-10	1.2709e-121	7.33692e-30	1.09446e-51	9.78029e-26
F_12pcw_STR	1.52689e-118	2.00267e-75	7.66413e-20	1.05119e-104	4.90859e-08	7.70129e-05	5.66897e-20	1.43317e-12	1.33087e-36	6.74523e-111	2.53118e-09	1.12495e-113	6.38349e-30	1.28951e-43	3.08003e-25
F_12pcw_M1C	1.13977e-127	3.35408e-89	1.65638e-21	5.35023e-103	1.71355e-07	0.000345385	2.27505e-22	4.12719e-10	5.33769e-40	3.96212e-101	4.21717e-10	5.12461e-119	3.93612e-31	1.6238e-50	1.61288e-24
F_12pcw_DFC	3.09526e-128	3.69639e-90	2.22299e-22	1.85783e-103	5.27225e-07	0.000127327	4.565e-22	3.25781e-10	2.76235e-39	2.33429e-104	1.1601e-10	2.31306e-119	1.43137e-30	7.08078e-50	8.39247e-26
F_12pcw_ITC	3.31145e-126	2.44811e-86	2.38625e-21	9.88023e-104	2.30836e-07	0.000368984	7.98489e-22	6.40117e-12	1.97858e-38	3.39081e-105	3.44694e-10	9.8671e-118	4.49629e-30	3.39774e-49	8.19089e-25
F_12pcw_VFC	1.13608e-129	1.92721e-89	4.51488e-22	8.96295e-100	3.92824e-07	0.000271949	8.1908e-23	1.77973e-10	8.38279e-39	8.06856e-103	9.90368e-10	9.12192e-120	3.62149e-31	4.12309e-49	5.1546e-25
F_12pcw_STC	1.15985e-127	6.93856e-89	1.44207e-22	1.389e-101	8.04448e-08	0.000268857	4.21204e-23	2.20716e-10	1.44325e-38	2.87642e-100	4.28766e-10	3.96499e-118	6.49215e-30	2.31368e-47	1.26635e-23
F_12pcw_IPC	7.72352e-130	2.65993e-89	4.75576e-22	6.78967e-99	8.28888e-08	0.000750733	1.53157e-22	5.47954e-10	4.76805e-37	7.52565e-100	1.57931e-09	1.35464e-116	1.26626e-30	4.23684e-48	2.40548e-24
F_12pcw_OFC	1.36084e-127	1.4352e-87	1.27442e-21	7.06483e-104	4.37072e-07	0.000353084	6.27812e-22	8.8086e-11	9.42138e-40	7.39779e-104	2.999e-10	1.16846e-118	3.15568e-30	8.09269e-51	9.93797e-25
F_12pcw_S1C	1.37359e-125	8.84091e-88	1.01804e-20	7.10795e-98	1.74788e-07	0.00137067	6.9378e-23	5.9755e-10	5.64077e-37	9.69303e-99	6.11522e-10	6.63291e-117	1.02377e-29	2.32176e-45	1.39648e-24
F_12pcw_STC.1	5.88393e-128	3.17532e-86	1.08451e-21	1.35594e-101	7.19828e-08	0.00259783	1.59733e-21	1.72844e-10	4.86127e-39	1.34945e-102	4.29037e-10	4.0017e-118	1.46832e-30	1.7685e-48	1.05521e-24
F_12pcw_V1C.1	4.72964e-125	1.68646e-88	3.56976e-23	3.00978e-104	3.14161e-07	0.00135054	5.22223e-22	5.62047e-10	1.28529e-40	3.14671e-104	6.68745e-10	4.3567e-122	3.27476e-30	3.70265e-51	1.52943e-24
F_12pcw_A1C.1	1.81618e-128	6.88589e-91	8.55942e-24	4.69881e-100	4.38798e-08	0.00123092	3.0406e-21	2.3387e-10	6.65038e-36	8.41269e-103	4.12367e-10	5.10126e-119	2.95946e-31	3.74595e-44	1.60409e-25
F_12pcw_CB	7.12988e-131	1.05704e-90	2.66585e-22	1.26326e-105	8.26168e-09	3.57448e-05	2.28655e-22	1.96983e-11	1.20916e-37	5.7438e-116	4.00568e-10	1.27989e-120	1.28601e-31	1.04754e-46	3.13177e-29
F_12pcw_ITC.1	1.18444e-128	6.98307e-89	1.17782e-22	1.85595e-104	1.02591e-07	0.000994636	1.4759e-20	2.14337e-11	2.59311e-37	1.15451e-103	2.69935e-10	1.4496e-118	2.21293e-31	1.71677e-48	2.35322e-25
F_12pcw_IPC.1	8.89294e-127	2.51011e-88	5.25921e-22	5.87364e-101	6.25478e-08	0.00140975	2.12854e-21	1.1262e-10	8.32176e-39	2.0724e-102	1.42797e-09	1.38164e-120	1.29068e-31	2.81005e-45	6.06618e-25
F_12pcw_S1C.1	1.277e-127	7.94469e-87	3.94877e-22	5.38515e-101	1.66089e-07	0.00211127	5.3822e-22	1.75487e-10	1.14126e-38	1.37519e-100	3.41216e-10	2.25872e-120	3.05064e-30	8.80441e-44	5.12108e-25
F_12pcw_DTH.1	1.37887e-129	7.46311e-86	8.77983e-21	3.32363e-104	4.63766e-09	0.000156934	4.30722e-22	4.76899e-10	2.01554e-38	5.85963e-113	2.22117e-09	7.50133e-116	6.80253e-33	5.10204e-45	3.21439e-27
F_12pcw_HIP.1	3.69268e-124	1.15121e-81	2.61312e-21	4.35393e-106	2.25046e-07	0.00204925	2.6965e-21	8.07489e-13	1.85047e-38	3.98751e-110	1.10522e-09	4.55063e-118	2.24032e-29	1.30415e-49	1.31629e-25
F_12pcw_DFC.1	1.27711e-130	1.7515e-88	1.66755e-23	9.32485e-102	1.0268e-07	0.000342087	3.09232e-21	6.0569e-11	4.47973e-37	7.32853e-105	9.43195e-11	1.45231e-118	3.31983e-30	2.41968e-43	2.58765e-25
F_12pcw_OFC.1	2.43027e-123	4.24275e-83	3.85723e-22	5.59362e-99	1.17957e-06	0.000433265	1.0354e-20	8.39485e-11	1.11011e-36	1.8481e-106	8.0848e-10	3.66576e-117	1.46655e-29	1.83911e-43	4.01755e-24
F_12pcw_M1C.1	5.5452e-130	5.53816e-92	2.34761e-21	4.84119e-102	1.5302e-07	0.00104753	8.72557e-23	4.34574e-10	2.93778e-40	1.67677e-99	1.77421e-10	1.61679e-122	1.51553e-30	8.24615e-46	4.42253e-25
F_12pcw_VFC.1	6.40647e-125	3.97362e-83	1.95669e-22	3.37823e-97	2.44132e-07	0.000946238	1.93695e-21	1.83118e-10	6.36551e-37	2.22452e-100	1.84079e-09	4.79686e-118	1.88224e-30	4.37992e-47	1.60471e-25
F_12pcw_AMY.1	2.47186e-125	3.20116e-83	6.44758e-22	7.00923e-109	9.63713e-08	0.000247076	4.17933e-22	2.88919e-13	1.23501e-39	5.11028e-114	9.32798e-10	4.7981e-130	9.74315e-31	3.48507e-48	7.93538e-26
F_12pcw_STR.1	7.2931e-120	6.42665e-74	1.50561e-19	4.56818e-104	6.30848e-08	0.000309474	7.96675e-21	2.82026e-12	7.45926e-38	3.94168e-110	2.9437e-09	3.843e-115	8.43367e-27	4.32635e-45	8.62334e-23
F_12pcw_AMY.2	1.20201e-121	1.81104e-79	9.07169e-21	5.66227e-107	1.72304e-07	0.000239322	2.8657e-20	2.15053e-13	3.84639e-40	8.8472e-116	1.2582e-09	6.82251e-124	4.6433e-30	2.18471e-43	2.75323e-25
F_12pcw_M1C.2	2.0989e-125	1.70884e-85	1.01449e-20	2.42532e-95	1.29579e-07	0.00177806	7.02273e-21	7.59041e-10	1.05235e-34	1.92475e-98	2.10073e-09	2.10792e-112	4.23451e-29	2.13593e-42	7.40296e-24
F_12pcw_ITC.2	2.00033e-122	7.14574e-79	3.49619e-23	9.54424e-99	1.18664e-07	0.00119308	2.19615e-20	1.58889e-10	3.01113e-36	4.28359e-101	2.79888e-09	7.77896e-114	1.52142e-28	1.74519e-44	2.50319e-24
F_12pcw_VFC.2	1.34033e-124	1.80729e-78	2.63748e-20	7.45415e-98	2.03282e-07	0.000434101	3.9669e-22	1.79076e-11	5.17298e-37	9.44756e-101	2.04682e-09	2.02454e-111	1.7967e-28	1.85335e-43	3.26989e-24
F_12pcw_STR.2	7.23852e-124	3.50118e-86	1.47604e-19	6.03637e-105	3.64948e-08	0.000820562	5.86954e-21	9.51398e-13	1.6905e-39	3.83291e-112	2.35339e-10	2.04342e-124	7.12141e-30	3.43716e-49	1.49663e-23
F_12pcw_CBC	6.58838e-120	3.18687e-77	5.24434e-21	8.27872e-104	1.4296e-08	0.000103854	1.01033e-20	3.87992e-11	1.93287e-37	4.00023e-111	2.68409e-09	7.12004e-113	1.59826e-28	1.81728e-47	2.84792e-25
F_12pcw_DTH.2	7.43268e-120	8.53331e-75	6.12942e-19	1.87346e-100	1.61738e-08	0.000304662	2.08818e-20	1.67745e-11	8.72421e-36	1.92207e-110	2.20234e-08	7.03861e-113	1.07827e-30	1.21697e-46	2.42303e-25
F_12pcw_DFC.2	1.00848e-123	4.67818e-85	4.07493e-20	8.43188e-101	4.69751e-07	0.00343565	4.07865e-21	1.59069e-10	6.45415e-38	9.82328e-104	4.33666e-10	1.30364e-114	1.7019e-28	2.84269e-41	5.23597e-24
F_12pcw_OFC.2	4.87232e-127	2.54027e-87	3.8293e-21	1.5963e-101	5.06924e-07	0.00102777	7.37844e-21	3.48899e-10	2.67361e-38	3.63614e-103	2.02125e-10	3.47213e-117	1.06802e-28	6.06826e-42	8.90787e-25
F_12pcw_S1C.2	4.5512e-126	2.43597e-84	4.28237e-22	2.25596e-100	5.65091e-08	0.00155315	1.38607e-21	4.58101e-10	4.21188e-37	2.4274e-99	6.76066e-10	1.29695e-115	4.38737e-29	8.44149e-42	7.49432e-24
F_12pcw_V1C.2	2.11192e-125	2.60784e-89	5.69102e-22	2.22178e-102	2.67053e-07	0.000523053	4.58824e-22	2.6591e-10	8.14927e-41	4.84226e-104	1.83248e-10	1.27618e-116	2.21306e-28	1.09919e-47	4.31292e-25
F_12pcw_MFC.1	1.44881e-126	2.28186e-90	3.70186e-21	9.49591e-102	4.87604e-07	0.000505883	1.47663e-21	4.2188e-10	3.6491e-38	7.35061e-103	1.65645e-10	1.39978e-118	1.12177e-29	4.91579e-44	9.12658e-25
F_12pcw_HIP.2	3.85006e-122	1.09833e-83	1.81449e-20	5.7011e-106	6.68517e-07	0.000357988	1.53429e-21	3.13511e-11	5.2811e-39	9.86669e-109	3.21367e-10	2.41355e-118	6.62148e-29	1.88147e-49	5.20845e-24
F_12pcw_IPC.2	1.44757e-119	7.836e-77	5.01949e-22	2.96247e-93	6.6066e-08	0.0023648	1.60721e-20	1.9783e-10	1.3068e-35	1.01438e-98	1.60223e-08	8.44203e-112	2.05191e-27	2.01945e-42	3.87825e-23
F_12pcw_A1C.2	6.3961e-126	4.25255e-87	7.95807e-22	2.88513e-99	1.13496e-07	0.000532702	4.90825e-21	2.42529e-10	8.78822e-37	6.58438e-103	1.87073e-10	2.68208e-117	6.39162e-30	1.65215e-41	3.26653e-24
M_13pcw_STR	2.74897e-125	3.17677e-90	3.07387e-20	4.12102e-103	2.33494e-08	0.000263697	1.31299e-21	6.48034e-13	2.20281e-40	3.56499e-111	3.56373e-10	8.22513e-126	8.61859e-30	1.33306e-51	7.84924e-24
M_13pcw_M1C	5.23293e-130	3.24502e-92	6.29853e-22	1.35935e-101	4.49598e-08	0.00150568	8.78831e-22	8.15517e-11	8.57565e-38	5.6807e-103	1.22398e-10	5.2025e-123	6.56499e-30	2.36755e-42	2.18859e-23
M_13pcw_AMY	4.30489e-127	8.82173e-91	1.73441e-22	1.00627e-102	1.71545e-07	0.000445799	3.62024e-21	2.8269e-11	3.63877e-38	6.3308e-107	1.05762e-09	3.44102e-126	2.24832e-29	7.03645e-46	2.17968e-23
M_13pcw_S1C	3.1545e-130	7.55794e-92	6.73596e-22	7.03935e-98	3.89811e-08	0.00138751	2.88356e-22	2.63453e-10	1.96222e-38	1.59675e-99	4.9318e-10	3.45299e-122	7.16286e-30	9.8009e-43	2.32792e-23
M_13pcw_V1C	3.70663e-128	2.51585e-91	8.87836e-22	5.31729e-101	1.4576e-07	0.000619345	4.44859e-23	5.91032e-10	6.38539e-40	1.59367e-102	1.73909e-10	1.90011e-123	7.01892e-29	4.0035e-48	9.5558e-24
M_13pcw_A1C	1.04779e-125	3.1648e-86	8.66781e-22	1.79519e-103	1.139e-07	0.000440594	1.97813e-21	1.11938e-11	2.56755e-38	1.98053e-108	3.53731e-10	1.73763e-119	4.16983e-28	6.97928e-44	3.8381e-24
M_13pcw_HIP	9.33578e-120	1.1241e-79	3.76237e-21	2.63737e-101	2.02936e-07	0.00027714	1.85702e-21	1.83348e-11	3.42251e-38	1.09816e-108	5.63574e-10	5.63236e-118	2.85546e-30	1.55185e-48	2.21947e-23
M_13pcw_VFC	1.21912e-131	4.05704e-92	3.88218e-22	1.40893e-100	5.99968e-08	0.000309986	6.40442e-22	5.48944e-11	3.23202e-39	1.41131e-101	1.44221e-10	1.39136e-122	3.0643e-30	8.89355e-44	1.39808e-23
M_13pcw_MFC	2.7145e-128	2.21027e-89	6.62783e-22	1.3826e-98	1.91025e-07	0.000223205	1.73187e-21	2.80357e-11	5.07804e-38	3.00595e-105	1.04762e-09	1.57667e-119	1.59551e-30	2.65276e-41	6.06696e-24
M_13pcw_STC	5.92129e-128	2.7819e-90	5.22187e-22	7.04331e-105	1.01439e-07	0.000317723	1.27999e-22	3.12171e-10	4.56519e-40	1.44223e-106	1.05086e-10	1.19624e-123	1.33446e-29	1.76771e-45	3.24453e-24
M_13pcw_OFC	1.06917e-125	4.51171e-86	5.37645e-21	3.83017e-103	2.0782e-07	0.000250832	2.64432e-21	4.08898e-12	1.14252e-38	5.94609e-109	6.29673e-10	3.8949e-118	1.79675e-29	3.45976e-42	2.35936e-24
M_13pcw_IPC	2.86238e-130	2.24134e-93	7.73685e-24	3.79617e-100	7.06675e-08	0.000573838	3.22294e-22	3.28007e-10	1.96767e-37	2.27179e-102	1.25019e-10	1.29114e-124	1.28248e-29	1.25092e-43	8.46983e-24
M_13pcw_DFC	2.79865e-130	5.30381e-91	4.5804e-23	1.09076e-99	9.46663e-08	0.00147596	2.44126e-21	4.74869e-11	1.28842e-38	3.42287e-104	2.52557e-10	3.98691e-122	1.23364e-29	3.97393e-41	4.0353e-23
M_13pcw_ITC	8.31849e-128	3.2246e-90	2.07634e-21	5.1869e-106	1.32591e-07	0.00169085	1.21093e-22	1.13206e-10	3.5189e-41	4.84009e-108	3.33667e-10	1.24482e-123	1.0658e-29	1.70665e-46	2.90671e-23
F_13pcw_STR	1.88878e-124	4.69055e-85	1.13304e-19	7.26456e-110	7.50935e-08	0.00116827	4.43372e-24	1.67553e-12	1.62816e-43	3.36437e-112	1.79381e-09	1.36622e-124	2.29248e-29	2.9526e-53	3.99213e-23
F_13pcw_S1C	5.99052e-132	2.11717e-91	1.23381e-22	2.64449e-103	9.25239e-08	0.00168721	7.7391e-25	3.50322e-10	1.77969e-40	1.43149e-102	3.17422e-10	3.26121e-121	2.17475e-30	4.37499e-49	2.15333e-24
F_13pcw_V1C	6.45801e-128	2.02032e-88	4.68682e-22	2.46192e-107	2.10482e-07	0.00151078	8.05112e-25	4.34275e-10	2.02881e-41	9.79688e-109	1.34415e-09	5.36632e-123	8.25756e-30	2.43909e-55	3.01571e-23
F_13pcw_AMY	7.73938e-126	2.48962e-86	6.76075e-22	2.63673e-110	2.82281e-07	0.00116616	1.06356e-23	2.65626e-13	4.20014e-42	2.1792e-114	7.79382e-10	2.30994e-126	3.58485e-30	4.90527e-49	8.40357e-24
F_13pcw_IPC	6.03599e-130	5.83318e-90	1.5748e-21	5.99671e-106	5.84815e-08	0.00194749	7.33757e-23	4.37259e-10	6.83728e-40	9.82272e-105	2.60563e-10	3.33878e-122	1.87652e-31	2.50816e-48	1.74934e-24
F_13pcw_CB	2.09346e-124	1.38113e-81	1.8582e-21	2.99505e-108	2.2477e-08	0.000184053	1.90684e-24	6.29632e-10	2.00741e-41	7.47563e-115	2.04959e-09	3.0981e-119	4.52192e-30	7.23884e-57	7.12467e-25
F_13pcw_DFC	1.01046e-129	1.48773e-88	1.18847e-20	1.87744e-105	3.27291e-07	0.000475285	1.78878e-23	8.78178e-11	1.08831e-39	2.23954e-105	3.60638e-10	1.01219e-121	1.20803e-29	2.75817e-47	4.70039e-25
F_13pcw_OFC	2.0208e-116	5.54926e-84	8.17717e-19	2.64903e-94	1.23668e-06	0.000331732	3.57427e-21	7.79756e-10	2.26663e-37	2.46144e-98	5.09066e-10	1.85177e-110	1.45877e-26	4.47873e-45	7.41227e-22
F_13pcw_STC	1.55682e-126	4.65715e-84	3.92002e-22	9.54792e-102	6.61411e-08	0.000921107	4.42409e-23	3.02675e-11	7.52926e-37	1.76451e-100	8.1235e-10	1.3609e-116	2.03875e-29	7.35177e-45	2.83474e-24
F_13pcw_A1C	1.25861e-130	5.17123e-89	7.19796e-22	2.44509e-103	3.16415e-08	0.000513526	4.2836e-23	1.56788e-11	7.73116e-39	3.42811e-107	2.52908e-10	1.72917e-126	1.4821e-32	4.50074e-52	6.29725e-25
F_13pcw_HIP	2.92445e-126	1.22497e-85	3.11584e-21	3.23488e-108	2.15683e-07	0.00101888	1.83569e-24	2.1027e-11	5.65602e-41	1.17228e-110	9.87571e-10	3.34653e-125	5.65068e-30	5.44339e-53	2.05805e-25
F_13pcw_M1C	2.69364e-129	2.39733e-91	9.95983e-22	2.00682e-101	1.52021e-07	0.00138823	2.8235e-23	3.17467e-10	8.81893e-39	2.29155e-102	6.03631e-11	8.21476e-121	1.0667e-30	2.03094e-45	2.18358e-24
F_13pcw_ITC	2.6981e-128	4.24988e-86	2.56613e-22	2.51329e-101	7.09562e-08	0.000957146	3.97944e-23	3.44101e-11	2.91333e-38	2.08735e-106	5.96282e-10	3.64563e-120	7.59783e-29	4.59183e-47	6.94809e-24
F_13pcw_MD	1.21148e-126	4.51079e-82	2.90364e-20	1.40353e-104	1.886e-08	0.000156111	2.29279e-23	6.60173e-11	4.57625e-37	5.79159e-110	2.08565e-08	2.07223e-117	2.68785e-32	3.24331e-52	5.62414e-26
F_13pcw_MFC	1.46629e-129	1.41277e-90	5.11879e-22	2.91936e-108	2.92397e-07	0.000738047	1.31196e-24	2.02146e-10	5.2186e-42	2.21021e-109	1.94855e-10	6.67838e-122	9.60715e-31	3.70513e-51	3.66964e-25
F_13pcw_VFC	8.7951e-132	1.19091e-91	1.28857e-21	1.41221e-102	2.54657e-07	0.0035038	2.57455e-23	8.35558e-10	2.24091e-39	2.96443e-101	6.28515e-11	3.53906e-120	4.72285e-31	1.4956e-50	2.53333e-24
M_13pcw_S1C.1	5.83752e-125	5.18494e-86	4.54847e-21	1.16886e-101	2.20057e-07	0.00254218	4.95601e-21	3.48234e-10	3.19698e-38	4.11379e-103	5.53863e-10	2.4161e-115	1.12952e-28	2.47753e-43	4.97319e-23
M_13pcw_DFC.1	6.45078e-123	5.34009e-82	6.85295e-21	5.70223e-99	6.83151e-07	0.00189179	2.07084e-20	1.08816e-10	1.99156e-38	8.22504e-100	9.68474e-10	1.08818e-111	2.77396e-28	4.27136e-46	1.22531e-23
M_13pcw_CB	1.08397e-124	3.57796e-85	3.79398e-21	9.52579e-111	3.59615e-08	0.000317149	7.69217e-23	9.23495e-11	2.17341e-40	1.63379e-113	1.2405e-09	1.73072e-118	8.51029e-30	1.23793e-53	3.15378e-25
M_13pcw_AMY.1	9.51908e-121	2.35569e-80	1.14798e-21	6.04422e-110	9.08304e-07	0.00156539	1.07679e-20	1.23437e-12	2.64906e-40	1.66879e-114	9.43269e-10	2.92008e-123	1.70813e-27	1.99538e-44	2.33407e-23
M_13pcw_ITC.1	2.69964e-123	1.55716e-83	3.25817e-20	9.4803e-105	1.00473e-06	0.00271613	3.25674e-21	4.15859e-11	2.70627e-39	3.7349e-106	6.47882e-10	8.45429e-114	9.04643e-28	2.47146e-45	1.76244e-23
M_13pcw_HIP.1	1.20839e-119	5.04015e-81	7.37181e-21	2.72763e-107	8.73351e-07	0.000322193	1.41925e-21	1.6581e-11	1.03932e-40	8.45334e-107	1.61514e-09	3.29056e-116	5.52659e-28	1.21851e-53	4.09027e-23
M_13pcw_IPC.1	4.26114e-124	3.80005e-87	4.08833e-21	1.94935e-99	1.1795e-07	0.00553893	8.72715e-22	5.37976e-10	9.84376e-38	2.34445e-97	2.18209e-10	1.15848e-117	2.11604e-28	5.58807e-44	5.43938e-23
M_13pcw_A1C.1	1.21675e-125	6.53344e-82	7.8114e-22	4.4205e-99	1.13633e-07	0.00085834	4.74565e-22	1.71513e-10	2.93805e-36	3.82512e-101	1.03276e-09	6.33827e-115	1.25335e-28	3.66459e-44	2.64745e-23
M_13pcw_VFC.1	7.77083e-123	3.48469e-79	2.95055e-22	3.71445e-98	5.4884e-07	0.00278393	4.74734e-20	3.10782e-10	1.03233e-35	9.10858e-102	9.17723e-10	1.42592e-110	6.37168e-28	3.88017e-41	2.77481e-23
M_13pcw_STR.1	2.85845e-118	1.02286e-76	7.20131e-18	1.56766e-101	9.33662e-08	0.000307943	7.16824e-21	1.38687e-12	1.85074e-38	1.82585e-107	2.9802e-09	9.67167e-113	1.7299e-28	2.67713e-47	3.47684e-22
M_13pcw_OFC.1	7.16831e-116	9.70566e-72	5.24086e-21	1.74929e-99	8.59129e-07	0.000554733	7.28923e-20	2.56678e-11	1.63288e-37	2.04688e-105	6.46382e-09	8.38517e-108	3.25265e-27	1.01511e-43	1.51823e-23
M_13pcw_MFC.1	1.20363e-115	2.5904e-73	4.18741e-20	2.45994e-101	3.82525e-06	0.000245926	7.30214e-20	8.28433e-11	8.67644e-38	5.17063e-106	3.05347e-09	1.55754e-110	1.25748e-26	6.47822e-45	7.9092e-23
M_13pcw_V1C.1	4.41043e-121	3.61615e-85	1.75072e-22	1.89183e-106	8.81702e-07	0.00207304	4.25054e-22	3.44478e-10	3.64061e-41	1.51398e-104	1.39732e-09	1.59589e-120	4.24337e-28	1.69638e-49	5.65808e-23
M_13pcw_M1C.1	2.37516e-125	1.91754e-87	1.07207e-20	3.36245e-102	2.85945e-07	0.00252661	7.42866e-22	1.47229e-10	1.32855e-40	1.56567e-102	4.93181e-10	3.02515e-120	2.64488e-29	3.98881e-46	2.94768e-24
M_16pcw_VFC	1.44333e-126	1.18245e-82	2.55718e-21	9.70338e-101	1.0599e-07	0.00128409	2.49827e-23	1.59848e-11	3.93406e-41	2.2883e-103	3.52786e-09	2.02043e-122	1.39592e-31	9.46006e-49	7.85009e-23
M_16pcw_OFC	1.83844e-126	1.16835e-82	8.37542e-21	7.08222e-98	6.84349e-08	0.00265424	5.26221e-24	5.25078e-11	1.60683e-38	9.32967e-100	3.30215e-09	1.00463e-120	1.31518e-30	1.4045e-49	2.11547e-22
M_16pcw_STC	1.42036e-120	7.95021e-80	4.75366e-22	2.02005e-99	2.71691e-07	0.0018254	5.01779e-23	6.85451e-12	4.99286e-38	7.66137e-102	6.83178e-09	1.12001e-120	1.06939e-28	1.70381e-49	1.19493e-23
M_16pcw_DFC	8.34963e-120	2.8602e-78	5.88498e-21	1.01147e-99	6.65409e-07	0.000995827	9.96839e-23	2.78404e-11	1.88417e-39	1.87767e-103	9.72889e-09	1.77905e-116	9.12239e-28	4.26837e-48	6.82398e-22
M_16pcw_IPC	4.45662e-125	3.00192e-85	2.44115e-20	4.11356e-100	1.32024e-07	0.00126357	1.89284e-22	1.58288e-11	1.66129e-40	8.51127e-103	2.28708e-10	8.98635e-120	7.24577e-30	2.39708e-46	1.37443e-21
M_16pcw_A1C	3.4264e-127	9.43378e-86	5.47031e-20	3.18029e-98	7.07265e-08	0.00237532	3.68985e-24	2.437e-10	1.0211e-38	2.3951e-99	9.27692e-10	4.64813e-123	7.82159e-30	2.36582e-45	1.16963e-22
M_16pcw_MFC	3.39737e-117	1.14275e-73	7.26635e-20	4.80686e-98	8.98407e-07	0.0021543	2.20782e-22	2.69286e-11	4.45197e-39	1.85521e-98	1.7753e-08	7.95541e-115	8.24789e-26	5.35539e-50	1.68777e-21
M_16pcw_STR	1.06391e-124	1.43159e-86	9.19156e-19	2.11525e-99	2.54029e-08	0.00178277	2.38957e-23	3.39013e-12	1.01876e-38	1.43746e-108	3.26522e-09	9.19922e-128	2.33114e-29	1.14755e-46	2.53697e-23
M_16pcw_MD	1.95167e-123	3.27472e-81	5.9055e-22	4.46955e-101	5.18859e-08	3.81621e-05	7.91735e-22	1.53456e-12	2.86073e-37	7.36598e-109	1.12469e-08	4.13069e-116	1.15359e-32	1.7851e-55	9.14108e-27
M_16pcw_V1C	9.53265e-123	2.7463e-82	1.22786e-21	3.94796e-103	1.53317e-07	0.00281538	1.17188e-23	6.49042e-11	1.59348e-40	9.23851e-103	4.66178e-09	1.40429e-120	2.05386e-29	1.72814e-48	3.52348e-21
M_16pcw_VFC.1	2.29089e-133	6.74328e-93	3.36624e-21	1.38023e-100	1.37264e-07	0.000783719	8.45165e-25	1.04586e-09	2.92184e-37	8.17936e-101	1.61078e-10	3.4627e-124	3.43015e-31	3.72884e-49	1.08243e-23
M_16pcw_STC.1	1.63183e-128	2.73888e-88	6.91203e-22	3.30737e-105	6.62055e-08	0.000948899	1.07618e-24	1.96772e-10	1.56755e-39	4.45722e-105	7.10071e-10	1.52528e-126	1.06846e-31	7.72919e-57	1.19322e-23
M_16pcw_IPC.1	4.70878e-132	1.24173e-92	5.07869e-23	1.9167e-101	4.02446e-08	0.00141297	4.01674e-24	6.65017e-10	2.28782e-38	6.21565e-102	1.47726e-10	4.53646e-122	1.56566e-30	1.21368e-47	7.54918e-24
M_16pcw_A1C.1	9.51189e-130	2.51367e-94	1.10239e-21	8.20582e-102	1.04017e-07	0.000640314	2.6969e-23	6.40555e-10	1.42672e-37	2.62727e-103	7.04871e-11	2.64328e-122	2.6259e-30	5.50649e-46	2.16363e-24
M_16pcw_MD.1	2.64231e-128	7.4476e-86	3.60965e-20	2.42558e-102	4.25792e-09	0.000124916	5.41303e-24	1.8391e-10	6.38959e-40	2.14483e-110	2.5628e-09	4.97863e-123	2.32676e-34	1.75055e-52	6.18925e-27
M_16pcw_AMY	1.05365e-121	5.7858e-78	5.96471e-22	3.09151e-106	2.48881e-07	0.00199819	1.08096e-23	1.03056e-12	1.64132e-41	7.86919e-112	8.93748e-09	1.77028e-121	9.05349e-29	8.79938e-57	6.47568e-23
M_16pcw_V1C.1	2.53483e-123	4.59203e-89	5.3853e-21	1.3662e-105	2.83259e-07	0.00122281	1.44654e-23	4.08841e-09	8.35869e-41	1.66144e-102	9.23502e-10	1.99248e-120	6.75967e-29	3.88309e-52	2.6655e-23
M_16pcw_ITC	7.64499e-130	1.98434e-92	1.40456e-21	2.01025e-104	1.634e-07	0.000827558	6.76145e-24	3.99247e-11	2.30613e-40	6.79543e-106	7.59573e-11	1.89895e-124	1.54503e-31	5.45132e-51	2.46406e-25
M_16pcw_CBC	2.06031e-116	1.37556e-73	2.72193e-21	6.39453e-107	6.08994e-08	2.8953e-05	1.44837e-22	1.65195e-10	1.70271e-38	1.67713e-115	3.91419e-08	2.35302e-113	1.21082e-30	1.50149e-62	1.77339e-25
M_16pcw_HIP	5.76258e-128	1.83852e-90	3.15371e-22	1.89695e-108	1.85295e-07	0.000557606	2.14443e-23	3.80554e-11	6.51447e-40	2.42012e-112	7.87921e-11	2.60833e-123	1.6892e-34	3.7815e-54	2.37098e-25
M_16pcw_STR.1	1.1072e-128	1.61367e-90	3.15552e-21	8.17326e-107	2.02373e-08	0.000411144	3.81282e-24	1.08906e-12	3.42481e-40	1.85282e-114	8.61131e-10	5.56563e-127	2.55843e-32	2.19874e-52	6.17826e-25
M_16pcw_OFC.1	7.04056e-131	6.52565e-94	2.84746e-22	5.85884e-105	3.9294e-07	0.000641082	5.74486e-24	1.10216e-09	3.51717e-38	1.99756e-107	1.29036e-10	5.15246e-124	3.58522e-32	7.13824e-49	8.99209e-24
M_16pcw_DFC.1	1.29618e-132	4.74364e-94	1.42223e-21	4.64696e-108	4.30052e-07	0.000622743	3.30602e-23	3.51192e-10	4.06065e-42	8.90409e-109	1.48883e-10	3.70556e-128	1.13143e-31	7.11184e-51	4.05687e-24
M_16pcw_M1C	1.80591e-131	8.7635e-95	3.91234e-22	3.04639e-99	1.30563e-07	0.00110519	5.66472e-23	5.15209e-10	2.72953e-37	2.82443e-104	6.10035e-11	3.31816e-119	3.19272e-31	4.25598e-42	1.27277e-24
M_16pcw_MFC.1	6.572e-130	1.63201e-91	8.2478e-21	6.8906e-106	6.34755e-07	0.00139683	4.53066e-24	1.00233e-09	1.44444e-40	1.57647e-103	4.6436e-10	3.17607e-121	4.23373e-30	1.01194e-49	2.43696e-23
M_16pcw_S1C	8.42987e-130	1.67068e-93	7.33631e-22	2.10083e-102	4.2707e-08	0.00209613	9.17508e-23	3.14291e-10	4.86454e-37	2.39877e-102	1.34619e-10	4.36257e-122	8.12638e-32	1.99359e-48	1.73924e-23
M_16pcw_HIP.1	5.90388e-119	5.95893e-81	7.00533e-22	7.10742e-103	1.46811e-06	0.000399758	1.2822e-20	1.51229e-12	3.61916e-40	8.77209e-110	4.91167e-10	6.47512e-116	9.61577e-26	4.24265e-52	1.25021e-24
M_16pcw_ITC.1	8.59498e-126	1.66784e-85	1.09726e-21	7.4807e-100	9.27743e-08	0.00086584	2.25062e-22	3.90063e-12	3.96957e-37	7.16669e-105	4.56163e-10	5.97858e-123	1.37041e-30	8.60023e-47	2.30781e-24
M_16pcw_DFC.2	3.36004e-123	2.45896e-80	1.71516e-20	3.58049e-98	4.82812e-07	0.000244592	1.53395e-20	1.04506e-10	2.86806e-36	1.44324e-103	1.3825e-09	1.17806e-112	7.23202e-30	2.41601e-44	6.66824e-24
M_16pcw_IPC.2	1.09553e-128	3.95336e-91	3.71787e-22	4.03717e-101	6.4111e-08	0.00224364	5.57e-23	1.18006e-10	2.50947e-40	4.42653e-103	2.63317e-10	1.61406e-121	7.62591e-32	3.61735e-53	5.61674e-24
M_16pcw_STC.2	1.28196e-128	9.40971e-89	1.58878e-22	1.41336e-100	1.12995e-07	0.00151074	2.54325e-23	2.23801e-11	7.70416e-39	1.0775e-102	2.59514e-10	1.68134e-123	1.36702e-32	3.38556e-51	9.98229e-25
M_16pcw_V1C.2	4.03619e-122	1.2931e-80	6.26867e-22	1.82321e-99	1.14589e-07	0.000337557	1.01799e-21	7.26739e-11	4.56949e-38	2.14761e-104	1.45135e-09	6.1776e-115	1.75075e-30	5.7668e-51	1.55432e-24
M_16pcw_MD.2	2.20957e-118	1.60123e-70	9.50896e-21	1.08567e-96	8.8462e-09	7.34001e-05	3.37088e-20	6.48531e-12	2.11765e-35	1.84821e-108	9.07417e-08	1.63975e-117	2.11413e-30	1.75266e-48	7.91766e-26
M_16pcw_STR.2	1.42162e-123	3.64753e-86	3.56338e-21	1.97868e-101	2.6e-08	0.0002843	1.48774e-20	9.53908e-13	2.01082e-37	5.20902e-112	3.62215e-09	2.8716e-121	2.08656e-30	5.52433e-48	8.32019e-25
M_16pcw_M1C.S1C	3.54967e-132	1.08353e-88	4.47829e-22	1.91418e-101	1.49471e-07	0.000242252	5.24113e-22	3.75264e-11	6.72704e-39	1.39762e-106	4.01255e-10	3.96999e-119	8.24312e-32	8.87151e-50	2.39341e-24
M_16pcw_A1C.2	3.36014e-127	5.23984e-88	9.72456e-21	2.07791e-100	9.19889e-08	0.00161262	1.55517e-22	3.75819e-11	7.46573e-39	3.02298e-104	1.47528e-10	2.13115e-119	1.41175e-31	1.61667e-49	4.62014e-24
M_16pcw_VFC.2	3.9804e-132	1.02434e-90	8.33481e-22	4.5626e-103	2.26824e-07	0.000477863	3.01738e-22	3.88627e-11	1.73538e-38	1.67106e-106	1.89419e-10	2.46019e-122	1.12616e-33	1.17534e-52	6.27332e-25
M_16pcw_AMY.1	9.88381e-125	7.42779e-89	4.32765e-22	2.09563e-104	1.1053e-07	0.000497274	4.27399e-21	1.50327e-13	9.57315e-38	4.25005e-113	3.9032e-10	3.07082e-125	1.17727e-30	4.11604e-49	1.50948e-25
M_16pcw_MFC.2	3.36495e-122	4.33671e-76	5.32841e-21	3.81883e-105	7.6552e-08	0.000161257	2.29417e-21	2.81388e-11	6.65115e-39	3.10538e-109	3.64985e-08	1.36761e-112	3.93459e-31	2.78273e-54	1.70257e-25
F_17pcw_STR	5.19476e-119	2.28187e-73	8.08964e-20	4.21777e-96	5.44637e-08	0.000455127	3.22676e-24	8.79292e-13	4.67599e-37	3.21452e-108	8.56527e-08	6.80192e-123	1.12426e-29	6.13234e-57	3.07188e-23
F_17pcw_STC	8.71289e-122	1.18403e-82	1.21703e-21	5.07882e-94	3.04042e-07	0.00420503	3.09703e-24	1.07097e-10	1.99618e-37	4.54894e-98	1.48926e-09	3.40479e-121	4.25872e-27	1.12314e-45	2.89913e-21
F_17pcw_MD	1.05288e-122	1.03145e-73	5.64177e-21	2.58687e-101	1.55707e-08	0.000109389	1.53602e-22	5.39507e-12	4.64963e-38	1.79035e-114	3.42292e-08	2.25021e-116	1.99022e-31	8.06111e-56	1.42946e-25
F_17pcw_A1C	6.56009e-128	3.22943e-87	1.26393e-20	3.66275e-95	1.13571e-07	0.000663878	4.41527e-24	1.52136e-11	3.26711e-38	7.94405e-102	2.83776e-10	2.75097e-125	5.74548e-31	8.50582e-45	6.19121e-23
F_17pcw_HIP	8.99805e-122	8.7283e-76	5.12246e-21	1.16452e-100	2.52726e-07	0.000660405	4.89288e-24	1.06798e-11	1.93062e-40	2.3391e-107	4.94494e-09	3.42423e-122	1.93513e-31	3.90761e-60	2.2159e-23
F_17pcw_DFC	8.68192e-128	2.67434e-85	2.57899e-21	7.34787e-97	2.65817e-07	0.00149125	1.30757e-24	4.84012e-11	1.23238e-37	2.00343e-100	1.23128e-09	5.7365e-127	7.1872e-30	1.80976e-48	1.61571e-21
F_17pcw_VFC	4.20376e-129	5.60372e-86	8.59168e-21	6.71641e-104	1.95832e-07	0.000781224	6.98528e-25	1.75552e-11	3.39504e-40	2.63675e-107	1.67095e-09	1.19988e-128	2.29507e-30	1.5551e-50	6.29836e-23
F_17pcw_IPC	1.42518e-124	7.59351e-89	4.42341e-21	1.08092e-93	5.43897e-08	0.0012778	8.53381e-22	4.30247e-10	2.36126e-36	2.61537e-100	5.95773e-10	4.05444e-122	5.16546e-30	5.27966e-41	1.4934e-22
F_17pcw_M1C.S1C	3.98503e-127	4.48281e-85	1.26803e-22	2.18771e-96	9.71247e-08	0.000380578	2.79816e-22	5.77344e-11	2.13517e-38	1.46456e-101	9.74729e-10	5.89683e-123	3.97869e-31	1.42439e-44	1.95018e-23
F_17pcw_V1C	5.39367e-124	2.44333e-85	1.36655e-21	2.17083e-100	9.50941e-08	0.00154702	1.37835e-23	6.25426e-11	2.30251e-41	4.61858e-102	1.9658e-09	3.60053e-124	2.16443e-29	2.46883e-48	1.82577e-21
F_17pcw_CBC	1.39428e-121	3.26036e-79	1.79378e-21	7.76736e-101	2.76094e-08	3.73452e-05	2.58461e-22	3.96134e-11	5.05906e-38	9.83803e-116	7.39571e-09	5.57199e-117	3.13812e-29	5.06559e-55	7.09319e-25
F_17pcw_OFC	4.83778e-128	4.67421e-86	1.58095e-20	9.62561e-100	3.79797e-07	0.000311893	4.36889e-23	3.27519e-12	9.57441e-38	7.15077e-107	5.19614e-10	7.56824e-126	3.85038e-29	2.90461e-44	1.24952e-23
F_17pcw_AMY	1.09469e-121	1.16096e-80	5.56601e-22	6.86289e-102	8.24074e-07	0.00116693	1.29441e-22	4.30364e-13	2.6301e-40	2.11107e-107	1.15195e-09	7.69887e-123	1.55351e-27	2.37273e-48	2.72912e-23
F_17pcw_MFC	3.60553e-127	6.45314e-86	4.20383e-22	1.32377e-97	3.20554e-07	0.000264972	4.55084e-23	1.3751e-11	9.12122e-38	1.188e-103	6.85083e-10	2.95913e-121	4.44207e-30	7.81581e-47	4.512e-23
F_19pcw_STC	5.41862e-121	4.17771e-77	4.98102e-20	4.18044e-94	3.40384e-07	0.00209784	9.05687e-24	7.41736e-12	6.23655e-38	2.98337e-97	4.02582e-09	1.04107e-122	8.47334e-28	2.44129e-48	1.93854e-21
F_19pcw_IPC	1.19163e-120	1.29476e-74	2.8673e-19	2.94816e-94	3.24818e-07	0.00118936	2.67553e-23	3.94846e-11	1.9591e-38	3.14176e-95	5.85034e-09	7.65205e-120	3.17621e-28	3.67453e-50	1.63178e-20
F_19pcw_M1C.S1C	4.17245e-121	3.37959e-74	2.72199e-21	2.65877e-95	1.93647e-07	0.000724924	5.37923e-23	2.76577e-11	3.55666e-39	3.51487e-98	1.51753e-08	8.43533e-120	1.21462e-29	1.4418e-49	6.8853e-21
F_19pcw_MFC	4.95751e-124	4.42086e-75	3.53653e-21	1.98112e-98	4.73499e-07	0.000688353	2.3413e-24	9.36164e-12	4.63814e-39	2.63361e-105	2.6899e-08	8.46645e-125	1.04953e-29	4.03834e-55	3.07519e-22
F_19pcw_V1C	3.32493e-122	2.21656e-73	1.11073e-20	2.7485e-98	2.83466e-07	0.00079064	2.03772e-24	3.93494e-11	6.60692e-41	1.40961e-97	5.47927e-09	2.937e-120	6.61263e-29	1.02944e-54	1.52263e-20
F_19pcw_HIP	1.094e-113	5.90904e-70	1.28842e-19	7.21069e-94	1.45107e-06	0.000732476	6.51724e-23	1.27333e-11	3.80873e-37	1.23893e-104	1.97167e-08	2.94438e-112	5.18994e-28	2.14934e-56	6.0266e-23
F_19pcw_A1C	1.26478e-120	2.56668e-77	2.3648e-20	1.88447e-92	2.78552e-07	0.00465328	1.4097e-23	3.73447e-11	7.73e-38	1.22791e-94	3.28867e-09	1.72183e-118	2.0138e-27	9.88341e-49	3.38874e-21
F_19pcw_MD	6.04406e-119	2.69661e-71	1.35402e-19	2.17057e-96	8.3838e-08	0.000120564	1.21868e-22	5.71637e-12	3.01669e-37	3.78631e-103	1.27429e-07	2.10006e-112	2.30963e-28	6.72704e-57	5.57762e-24
F_19pcw_VFC	6.30278e-129	1.84226e-81	8.42088e-22	2.542e-97	1.10122e-07	0.000953921	1.40971e-23	3.49111e-11	3.2343e-39	7.79164e-102	1.52547e-09	7.49651e-127	1.09705e-29	9.97625e-48	3.01897e-22
F_19pcw_STR	8.31446e-118	4.2982e-73	3.49593e-19	3.89558e-101	1.48347e-07	0.000579894	3.61015e-23	2.24359e-13	1.77867e-40	5.11286e-110	8.82132e-08	3.16953e-121	3.41312e-28	1.27626e-56	1.19965e-22
F_19pcw_DFC	7.7601e-123	4.77757e-77	5.39837e-21	4.27974e-93	5.93181e-07	0.00209037	3.18123e-24	7.47842e-12	1.66768e-38	1.02872e-99	6.09934e-09	9.7312e-119	1.46061e-28	2.09975e-47	9.68793e-21
F_21pcw_CBC	1.22323e-123	2.30824e-83	1.75429e-20	1.63746e-98	3.31789e-08	1.98711e-05	5.90456e-22	1.16073e-09	1.38618e-35	1.06023e-111	1.3421e-09	5.19424e-118	2.11922e-27	8.76158e-48	9.56043e-26
F_21pcw_ITC	1.44342e-127	1.08416e-88	1.76691e-22	1.59276e-97	8.23741e-08	0.000237281	4.22439e-25	1.55004e-11	7.49865e-40	6.84383e-103	1.92334e-10	5.86248e-125	7.76039e-32	7.51031e-50	4.22741e-24
M_21pcw_MFC	1.47319e-130	1.45858e-91	4.13362e-22	2.90625e-98	3.86537e-08	0.000257964	1.1368e-22	1.05064e-11	2.61308e-38	3.73498e-107	7.93652e-10	1.51569e-130	1.73473e-35	1.95137e-50	1.78531e-25
M_21pcw_M1C	4.88022e-130	1.33663e-89	6.50219e-22	5.19754e-100	1.80124e-07	0.000408429	4.97473e-22	2.85926e-11	4.73212e-39	7.10765e-109	1.43878e-10	7.52656e-128	3.79335e-32	8.64312e-48	3.96922e-24
M_21pcw_STR	5.2876e-123	5.07344e-84	1.70346e-20	8.1511e-98	1.17273e-08	0.000114238	2.9435e-22	3.27205e-12	1.55786e-37	2.02714e-108	2.05675e-09	8.21096e-125	2.32642e-32	3.20758e-55	2.27618e-24
M_21pcw_HIP	1.84492e-128	7.36382e-87	2.01075e-23	7.21851e-102	1.74039e-07	0.000157462	8.37673e-23	4.84043e-12	4.2691e-38	1.14333e-113	3.36655e-10	2.33005e-128	1.70921e-33	6.87041e-55	2.13647e-26
M_21pcw_STC	4.09378e-131	1.64221e-89	4.80523e-22	3.52597e-98	6.93622e-08	0.000317109	1.03622e-23	2.39059e-11	3.79424e-39	2.09121e-107	5.13748e-10	1.49136e-127	1.33257e-34	1.46326e-49	2.16705e-24
M_21pcw_ITC	2.30343e-133	1.07788e-91	1.69282e-22	2.42752e-98	7.47235e-08	6.04918e-05	1.60196e-23	3.34276e-11	4.4594e-38	2.00714e-107	1.92721e-10	6.83333e-125	1.34791e-34	2.10508e-47	1.58542e-24
M_21pcw_AMY	4.49989e-126	3.56243e-89	2.01292e-22	1.26873e-101	1.69442e-07	0.00014618	1.41827e-22	8.52756e-12	1.01211e-38	4.17969e-111	4.21471e-10	3.03086e-125	1.42362e-32	2.01496e-51	4.41656e-26
M_21pcw_VFC	3.48782e-126	4.56281e-89	1.37496e-23	1.77091e-104	1.4745e-07	3.94072e-05	2.13274e-22	1.02497e-12	1.27414e-38	1.04886e-113	1.31433e-10	1.38029e-129	8.76164e-34	2.3003e-55	2.31451e-26
M_21pcw_OFC	5.13927e-130	6.10783e-89	4.51913e-22	2.1804e-96	5.44308e-08	8.02993e-05	5.75337e-23	1.08886e-11	5.18567e-39	8.58095e-107	1.29297e-09	2.8809e-124	7.7301e-34	4.20326e-49	8.84176e-25
M_21pcw_V1C	2.46047e-130	4.57771e-90	7.34464e-23	4.91752e-101	2.84898e-08	0.000461872	1.05978e-23	3.40039e-11	2.52767e-39	6.40046e-105	3.59753e-10	2.69218e-129	3.77563e-32	9.06041e-49	1.25263e-23
M_21pcw_S1C	6.1081e-133	9.67008e-91	2.55362e-22	7.77454e-100	7.7502e-08	0.000153506	7.59298e-23	3.00595e-11	2.30689e-39	6.20141e-109	8.42643e-10	9.28945e-129	2.02125e-34	1.00954e-49	4.47727e-25
M_21pcw_CBC	5.82807e-123	3.65224e-81	6.82525e-22	1.20336e-103	4.37466e-08	4.8775e-05	1.54603e-21	1.02146e-10	4.3906e-38	5.70058e-116	1.45698e-09	2.24398e-118	1.95372e-29	1.58659e-51	1.34413e-25
M_21pcw_IPC	2.45073e-130	8.05181e-90	2.60886e-22	2.44888e-100	1.06131e-07	0.000342473	3.22393e-22	4.05197e-11	1.46124e-38	4.00546e-107	2.20732e-10	2.19415e-124	1.14425e-33	3.24942e-48	2.68166e-24
M_21pcw_DFC	2.2777e-127	3.91653e-85	5.98141e-22	1.70435e-99	5.34363e-08	0.000476091	1.1304e-22	9.8239e-12	2.24952e-39	9.64828e-108	1.0582e-09	2.25541e-126	1.28895e-33	1.08226e-56	7.05773e-24
M_24pcw_HIP	2.49102e-124	4.27755e-75	1.27677e-22	1.49062e-102	2.65666e-07	8.12131e-06	3.7498e-22	8.00682e-13	8.63282e-39	1.06426e-116	4.36238e-09	2.43413e-122	3.2337e-32	3.8322e-59	2.76053e-26
M_24pcw_AMY	1.90488e-121	3.35013e-78	2.71819e-22	5.94336e-106	4.97725e-07	7.98477e-05	9.77626e-23	4.63787e-12	1.07432e-39	6.73677e-113	6.7688e-10	7.79869e-120	6.38434e-30	1.72429e-58	1.5972e-25
M_24pcw_DFC	5.42373e-133	9.33671e-88	1.74847e-21	4.27212e-102	1.98094e-07	1.02563e-05	1.17496e-22	5.5145e-11	3.17356e-38	6.83442e-107	1.92884e-09	4.51044e-125	2.50156e-33	1.10774e-60	1.74572e-26
M_24pcw_S1C	1.02943e-133	6.79033e-89	8.77313e-23	1.2608e-103	5.13108e-08	6.66247e-06	6.82598e-24	3.7041e-11	6.36957e-41	1.21294e-109	4.55204e-10	1.84297e-127	8.88066e-35	2.55861e-59	2.15086e-25
M_24pcw_MD	3.2831e-123	2.41857e-71	8.00678e-21	5.29354e-102	6.91121e-09	2.0112e-06	1.19102e-22	1.34308e-11	2.97423e-36	3.07091e-113	7.6265e-08	5.87851e-116	8.82185e-33	4.27138e-69	5.54632e-27
M_24pcw_STR	8.77138e-127	2.76836e-84	6.34202e-21	1.3596e-105	3.37086e-08	3.16107e-05	1.41419e-22	1.16407e-12	1.12494e-40	6.14687e-117	3.7912e-09	1.40221e-128	3.89956e-31	1.39107e-58	4.66735e-25
M_24pcw_A1C	1.77287e-129	1.09333e-87	3.0375e-22	1.43214e-103	6.64076e-08	3.92202e-05	5.04804e-23	4.57353e-11	3.29213e-39	1.66738e-109	1.01231e-10	1.8382e-127	1.71548e-34	5.71025e-56	6.63617e-26
M_24pcw_IPC	4.04774e-130	2.97857e-86	1.722e-22	2.55803e-100	2.899e-08	1.5657e-05	1.67643e-23	4.09183e-11	1.33051e-38	4.64238e-108	4.5826e-10	2.06342e-125	1.30846e-33	1.09951e-52	1.50392e-24
M_24pcw_OFC	3.37429e-130	2.13364e-82	3.67993e-24	4.09263e-100	2.24594e-07	3.62739e-05	9.23832e-23	1.24598e-11	2.72399e-37	8.56715e-108	3.83297e-09	6.20488e-124	2.30296e-34	2.20223e-54	1.28724e-24
M_24pcw_STC	1.19514e-126	8.43687e-80	6.40816e-22	1.60181e-98	1.29863e-07	5.21466e-05	2.25094e-23	1.57e-11	3.29626e-40	8.21592e-106	3.58504e-09	5.40489e-125	2.13947e-33	3.41876e-64	8.06521e-25
M_24pcw_ITC	1.55976e-131	9.67846e-90	3.6418e-23	2.41336e-99	9.43683e-08	1.35667e-05	1.54122e-23	1.15296e-11	3.09949e-39	8.28431e-108	8.81065e-11	9.17505e-130	6.78086e-35	1.67879e-51	2.20518e-26
M_24pcw_VFC	1.51682e-132	9.98266e-84	8.89629e-22	4.1983e-100	1.27984e-07	5.09519e-05	2.56788e-24	2.02178e-11	1.78941e-39	2.73707e-108	4.78879e-09	1.81943e-123	2.98309e-34	1.8051e-61	2.50724e-26
M_24pcw_M1C	1.69351e-128	2.95012e-82	4.56907e-21	2.55298e-102	5.86973e-08	1.3932e-05	2.26347e-22	1.24326e-11	2.20533e-39	2.98819e-108	9.83109e-09	5.94486e-126	1.34063e-33	2.42023e-61	7.49989e-26
M_24pcw_MFC	4.89857e-133	1.46398e-88	3.84792e-22	1.02819e-102	3.52615e-07	1.72873e-05	8.96089e-24	4.15736e-11	3.38748e-39	8.43862e-111	1.38672e-09	1.44337e-126	1.52855e-33	1.01838e-56	9.40868e-27
M_24pcw_CBC	1.69602e-120	1.76954e-74	5.02042e-21	1.37682e-102	2.50432e-08	9.81242e-07	4.67781e-21	2.22386e-10	9.02179e-38	2.98917e-114	4.01533e-09	1.30978e-114	7.60225e-30	2.68893e-55	1.46439e-25
M_24pcw_V1C	1.59752e-129	4.99299e-86	1.32844e-23	1.01291e-103	8.19665e-08	3.40848e-05	5.01624e-24	1.78837e-11	1.65576e-40	1.98378e-108	3.84982e-10	8.09992e-126	1.25002e-32	4.28417e-62	6.02494e-25
F_25pcw_A1C	8.62714e-116	3.38313e-72	2.04314e-20	8.2339e-92	1.9451e-07	0.000610302	1.30165e-20	8.62054e-11	5.43802e-35	1.24599e-101	2.1467e-08	2.17537e-113	3.28423e-32	4.90514e-65	1.54745e-26
F_26pcw_STC	3.67021e-122	1.06769e-83	1.79004e-20	5.3739e-106	6.67251e-07	0.000356659	1.52262e-21	3.12041e-11	5.17893e-39	9.3096e-109	3.19998e-10	2.28407e-118	6.50383e-29	2.51521e-49	5.15706e-24
F_26pcw_V1C	3.50777e-115	2.80579e-70	4.71177e-19	1.82801e-90	3.50931e-07	0.00056976	5.15431e-22	3.12122e-11	3.62748e-34	6.84926e-103	2.83692e-08	3.93579e-111	1.13554e-30	2.64819e-65	1.62129e-25
F_26pcw_DFC	1.35265e-114	1.79906e-70	5.30707e-20	7.27175e-95	1.96725e-07	0.00023085	1.69606e-20	5.12625e-11	3.83486e-34	2.95253e-103	8.24199e-08	2.25962e-112	9.59318e-32	5.31453e-68	8.97142e-26
F_35pcw_CBC	9.74682e-111	1.09996e-63	5.55014e-21	4.5975e-88	1.49505e-06	0.000915909	5.53015e-22	3.35746e-09	1.48018e-37	1.50829e-95	3.78825e-07	5.66109e-103	2.35134e-25	1.9361e-57	1.44024e-23
F_35pcw_VFC	3.73492e-128	4.44101e-75	2.07659e-23	1.17227e-101	8.31661e-08	0.000224117	2.08434e-24	1.0843e-13	1.19026e-41	1.4413e-106	6.80128e-09	3.19179e-127	6.03734e-36	1.63917e-62	4.21424e-25
M_37pcw_A1C	1.18138e-122	7.41919e-78	3.01481e-22	2.97376e-97	1.47607e-07	0.000163759	8.36685e-23	6.53736e-13	2.52807e-37	8.0698e-106	4.39751e-09	1.85357e-121	3.35054e-34	1.91076e-72	1.98598e-26
M_37pcw_OFC	1.20196e-120	3.93559e-74	1.16985e-21	3.6519e-101	1.58057e-07	0.000334011	9.50073e-24	6.02878e-12	5.00522e-40	1.37937e-104	1.77844e-08	1.19396e-119	2.49915e-33	6.66514e-68	6.78764e-25
M_37pcw_AMY	1.74464e-110	1.28592e-63	1.9216e-20	6.28169e-95	2.89519e-07	8.46402e-05	1.43795e-22	2.28875e-11	7.43666e-37	1.4012e-103	1.69112e-07	7.12065e-110	2.16365e-28	1.29423e-73	3.90344e-25
M_37pcw_V1C	5.3768e-120	2.49393e-72	1.47058e-21	3.89366e-100	2.81123e-07	0.000133155	5.35378e-24	4.88113e-12	2.03889e-40	9.13371e-107	1.70644e-08	1.37095e-121	4.83613e-33	9.71432e-73	1.39602e-24
M_37pcw_MFC	1.91246e-120	8.435e-74	5.48187e-22	7.58322e-100	2.07174e-07	0.000211184	8.13459e-23	4.23533e-12	7.50282e-39	1.71619e-106	1.42367e-08	2.28339e-121	7.29257e-34	6.08131e-71	7.57878e-25
M_37pcw_MD	1.25874e-106	5.5361e-55	1.69391e-19	1.74091e-94	7.35905e-08	4.73499e-05	1.62535e-21	1.55252e-10	5.35299e-35	9.40526e-101	1.83303e-06	6.98573e-101	1.64658e-25	2.78373e-80	5.40939e-26
M_37pcw_CBC	8.54052e-114	1.17285e-67	7.75759e-22	1.67594e-101	1.8094e-07	4.61048e-05	5.33152e-22	3.04962e-10	5.49272e-40	5.47428e-105	6.57808e-08	1.9503e-112	3.854e-27	2.54675e-74	4.79465e-26
M_37pcw_STR	1.18277e-109	6.11457e-64	1.48231e-20	9.9827e-93	2.17348e-07	0.000103513	3.52201e-22	2.07184e-11	8.79478e-36	1.59149e-99	9.45844e-08	9.92424e-110	9.36838e-28	1.10147e-74	1.27833e-24
M_37pcw_IPC	7.50932e-124	1.22684e-78	4.22919e-22	9.00167e-101	9.64959e-08	5.62087e-05	2.32123e-22	4.06792e-12	3.81231e-40	6.58898e-108	4.08333e-09	1.27937e-125	2.40353e-35	7.685e-66	2.05755e-25
M_37pcw_ITC	5.79285e-123	1.80803e-78	3.28209e-21	8.81517e-99	1.01396e-07	0.000181088	3.26617e-24	4.08176e-12	1.54758e-39	1.91267e-103	1.62559e-08	8.8858e-123	1.62545e-34	1.55295e-67	7.36803e-25
M_37pcw_S1C	3.94163e-119	1.67466e-71	2.28006e-21	1.13445e-99	2.22625e-07	0.000142854	1.07485e-22	3.36197e-12	8.7007e-37	2.94787e-104	3.92835e-08	2.00414e-119	2.78325e-32	2.48619e-75	3.91149e-26
M_37pcw_DFC	1.17775e-121	4.04999e-73	6.31032e-22	1.06431e-99	1.71628e-07	0.000260443	1.46156e-22	6.12551e-12	2.28424e-38	9.14963e-106	2.56722e-08	2.44737e-122	1.24525e-33	9.91273e-71	6.53817e-25
M_37pcw_STC	5.93933e-122	1.25335e-74	5.10669e-21	3.73922e-100	1.82681e-07	0.000316299	2.00211e-23	4.0612e-12	1.44156e-39	9.02024e-105	3.02199e-08	5.15116e-123	4.25835e-34	6.5701e-71	1.5415e-25
M_37pcw_M1C	4.03642e-117	3.88084e-70	5.63539e-22	4.53076e-98	2.20462e-07	6.74504e-05	1.10917e-22	1.58771e-11	8.67778e-40	3.80234e-103	1.04252e-07	9.39162e-117	1.11645e-32	1.10616e-78	2.36937e-24
M_37pcw_VFC	4.58157e-120	2.39911e-71	6.92636e-22	1.42746e-100	2.2824e-07	0.000416883	1.09727e-23	1.78226e-11	1.25889e-38	1.04441e-102	3.4108e-08	2.92289e-119	2.19079e-33	8.37577e-74	8.71642e-25
M_37pcw_HIP	1.18274e-109	1.21657e-63	1.70564e-20	9.88967e-94	2.71576e-07	0.00032613	5.33441e-23	7.57214e-11	6.78134e-36	4.24492e-101	2.75671e-07	2.08537e-107	1.67233e-28	2.89533e-77	1.46291e-24
M_4mos_STC	4.98088e-120	1.88758e-81	1.77216e-22	3.71501e-93	2.21018e-07	8.65234e-05	1.75729e-20	1.61713e-11	1.54369e-34	6.83346e-106	5.34765e-09	6.19399e-122	8.04842e-35	4.65335e-48	2.28846e-26
M_4mos_STR	1.92475e-117	1.86812e-70	6.50578e-21	1.72738e-95	1.77218e-07	6.94422e-05	4.82463e-22	2.37344e-10	5.30057e-37	2.1205e-102	1.89167e-08	8.45111e-126	1.07671e-32	9.46012e-63	2.24285e-24
M_4mos_V1C	1.60203e-128	9.70032e-87	2.51949e-21	5.16607e-100	6.58803e-08	0.000507553	4.09757e-22	8.24172e-12	2.43808e-38	1.93011e-108	6.11897e-10	1.21357e-130	2.27098e-37	2.3692e-57	5.70117e-27
M_4mos_CBC	1.19526e-114	2.90848e-66	1.7897e-20	6.8958e-98	2.39455e-06	3.38758e-05	4.37694e-20	8.37517e-11	1.78852e-35	5.11753e-105	1.06997e-08	2.39962e-112	1.63777e-28	5.18565e-66	1.66616e-26
M_4mos_HIP	1.55763e-121	2.37923e-79	2.84017e-21	9.56179e-97	3.03458e-07	0.000163291	2.20697e-22	1.41733e-11	4.38013e-36	5.56653e-109	2.49142e-08	1.20303e-121	2.39573e-35	1.94219e-56	1.94456e-26
M_4mos_MD	1.34884e-118	7.85868e-73	5.64533e-20	6.14066e-98	1.20269e-07	8.78829e-05	2.46893e-22	1.07682e-09	1.4449e-34	1.84147e-107	1.4695e-08	7.79988e-114	5.16007e-33	3.80284e-56	5.66603e-27
M_4mos_ITC	1.10143e-118	8.57115e-81	2.23724e-21	7.83815e-93	5.2322e-07	8.51284e-05	2.86235e-20	9.55128e-12	6.79018e-34	7.02289e-107	3.67849e-09	8.96246e-118	3.91567e-35	5.59196e-43	3.34548e-26
M_4mos_AMY	8.59187e-122	5.29727e-77	1.26523e-21	1.45583e-99	8.5211e-08	0.000153081	1.61578e-23	2.4335e-12	1.11682e-37	6.77406e-114	5.5473e-09	1.66965e-124	8.69248e-36	2.3862e-62	8.2772e-27
M_4mos_MFC	2.10534e-121	1.70513e-80	7.93979e-21	1.35564e-94	2.30034e-07	0.000157858	2.07505e-21	1.46273e-11	9.58209e-38	1.17057e-107	7.37775e-09	1.84086e-121	1.41447e-35	6.83126e-52	5.21662e-26
M_4mos_M1C	6.45872e-119	3.83317e-74	3.91988e-20	1.96218e-94	7.49936e-08	8.77949e-05	3.58933e-22	6.57343e-11	4.06977e-34	1.06071e-103	1.31811e-08	2.14039e-117	2.19646e-32	1.30417e-66	1.90023e-26
M_4mos_DFC	1.86747e-112	2.70378e-65	3.61639e-20	2.22018e-93	1.2244e-07	1.34041e-05	5.16743e-21	1.88801e-11	4.99042e-34	1.27243e-99	5.60517e-07	1.40853e-113	4.84802e-31	2.28642e-64	9.0491e-25
M_4mos_OFC	5.69995e-119	7.48408e-73	1.69417e-21	1.76557e-95	5.91117e-08	0.000119602	3.17673e-22	1.86355e-11	3.1239e-34	2.57384e-103	7.86577e-08	1.95265e-120	1.1938e-31	1.59672e-67	3.63217e-26
M_4mos_A1C	1.01011e-112	2.85411e-66	2.38391e-19	1.35995e-93	2.30045e-07	2.47859e-05	8.02271e-22	1.48524e-11	2.59883e-34	4.40539e-100	3.39771e-07	2.92433e-117	3.73103e-30	3.19024e-65	2.51423e-26
M_4mos_STC.1	5.24789e-112	2.91295e-66	3.5824e-20	1.26165e-92	1.29362e-07	5.27798e-05	4.05913e-21	1.17249e-11	7.90571e-34	4.55606e-99	1.64184e-07	4.82232e-117	2.38585e-30	9.4732e-62	9.93501e-26
M_4mos_VFC	3.69578e-117	1.35409e-70	8.66971e-21	1.77417e-95	1.00184e-07	3.18568e-05	4.52372e-23	3.37292e-11	1.54032e-35	1.64149e-102	1.68259e-07	3.35207e-115	1.41865e-32	1.30063e-68	7.09575e-26
M_4mos_ITC.1	1.77891e-114	8.71481e-69	1.08701e-21	6.64243e-92	8.92451e-08	3.35614e-05	3.72052e-21	4.08349e-12	1.96143e-32	1.59302e-101	2.47299e-07	1.55913e-116	2.13887e-31	1.91457e-64	3.87475e-26
M_4mos_AMY.1	4.98866e-117	8.75988e-72	1.81989e-20	8.37901e-96	1.46077e-07	3.77082e-05	1.29605e-22	8.61561e-11	1.46866e-35	1.19863e-107	2.72917e-08	1.19285e-114	2.42106e-31	5.79159e-68	2.75934e-27
M_4mos_M1C.1	1.01375e-125	7.69672e-79	1.39845e-23	3.00246e-100	5.31657e-08	6.05531e-05	2.27184e-22	3.68076e-12	1.58869e-39	2.00641e-111	2.10949e-09	5.05671e-130	2.47517e-37	3.29287e-65	1.11766e-27
M_4mos_MD.1	5.33082e-122	6.9933e-74	1.76782e-20	4.36643e-101	4.60896e-08	9.61077e-06	3.45555e-23	1.58537e-10	2.66988e-36	1.6983e-108	1.28136e-08	1.04297e-120	2.89213e-34	2.74419e-61	6.09619e-28
M_4mos_OFC.1	1.51564e-124	3.24304e-75	1.84999e-21	8.31096e-99	7.41126e-08	0.000127328	4.55552e-23	8.80391e-13	4.05315e-38	1.50284e-110	1.18288e-08	4.27079e-127	2.02991e-36	4.43548e-58	2.36921e-26
M_4mos_STR.1	5.11884e-118	5.15616e-74	6.90006e-20	1.01369e-95	6.24506e-08	1.37157e-05	5.92486e-22	6.67297e-12	4.66025e-35	2.09966e-109	1.42856e-08	3.70275e-123	1.36356e-32	1.19009e-60	4.94683e-26
M_4mos_STC.2	1.98196e-124	1.18625e-78	1.95223e-21	3.73476e-99	1.06169e-07	2.9951e-05	1.35092e-22	1.88247e-13	7.10528e-38	5.88481e-110	1.96629e-09	3.02742e-129	2.70434e-37	3.181e-61	3.95967e-26
M_4mos_A1C.1	8.03103e-125	4.14156e-79	8.98215e-22	1.41317e-100	1.70905e-07	8.91582e-05	3.08113e-22	4.16517e-12	1.49857e-38	1.94316e-108	2.58661e-09	2.45169e-123	4.14833e-37	1.31831e-59	5.52403e-26
M_4mos_HIP.1	4.08831e-119	2.20599e-72	6.87342e-21	4.09226e-97	8.45599e-08	3.64251e-05	9.87349e-22	5.74696e-12	5.49836e-35	1.5291e-110	1.92055e-08	7.20273e-119	6.12206e-35	3.35342e-65	5.14525e-27
M_4mos_AMY.2	6.53202e-125	6.45009e-80	2.67573e-21	6.79311e-100	1.00472e-07	0.000154016	1.5965e-23	7.35996e-12	1.37367e-36	3.78123e-110	1.14243e-08	2.50138e-125	3.79215e-36	1.7849e-63	1.03606e-27
M_4mos_MFC.1	1.55989e-125	2.97988e-82	1.58537e-22	9.21413e-100	6.55405e-08	0.000264976	1.6379e-22	3.76286e-12	1.06432e-38	3.86595e-110	3.11752e-09	6.56177e-131	4.48583e-38	1.36615e-60	3.47861e-27
M_4mos_V1C.1	1.56344e-129	1.6091e-83	1.17238e-22	1.70255e-100	6.03371e-08	0.000196453	8.05479e-23	3.28303e-12	2.61411e-39	1.17938e-112	3.41717e-10	4.70339e-130	2.72235e-37	4.84448e-61	1.08757e-26
M_4mos_ITC.2	9.48602e-126	2.93623e-81	3.26862e-21	3.89145e-99	8.40294e-08	7.98733e-05	3.12133e-22	1.30525e-12	8.24983e-38	1.98585e-109	1.53579e-09	8.90532e-131	6.3949e-38	6.07604e-60	8.67825e-27
M_4mos_S1C	6.64381e-127	2.62222e-81	1.62881e-21	1.49729e-99	6.52635e-08	0.000121052	7.69255e-23	2.85036e-12	3.69791e-39	2.09471e-110	4.46321e-09	6.32574e-132	9.60601e-38	1.04926e-62	1.70251e-27
M_4mos_IPC	4.96717e-127	2.30394e-81	1.27323e-22	1.00473e-101	6.91928e-08	0.000288527	7.1749e-23	1.20331e-12	1.39309e-37	2.12948e-106	1.876e-09	1.21261e-128	4.07517e-38	2.53119e-60	6.53609e-27
M_4mos_CBC.1	5.42355e-121	7.09325e-74	2.69061e-21	6.68713e-100	6.3526e-07	7.6426e-05	7.54398e-22	1.49311e-10	2.32118e-38	8.2149e-109	4.73838e-09	2.54556e-119	4.66393e-31	1.316e-64	1.61036e-27
M_4mos_DFC.1	8.32176e-126	1.93224e-81	1.97165e-21	1.30783e-97	5.16203e-08	0.000210406	8.98301e-23	4.49206e-12	1.2271e-39	1.55423e-108	1.03129e-08	2.6327e-132	2.33589e-38	2.03124e-58	4.93545e-26
M_4mos_VFC.1	3.29839e-127	3.4714e-80	1.08499e-22	3.52359e-101	6.76942e-08	3.71377e-05	2.04974e-23	2.58491e-12	1.06217e-38	3.28426e-108	2.09053e-09	1.42293e-127	1.59481e-37	1.34716e-60	9.5306e-27
M_10mos_S1C	1.15437e-120	1.57276e-70	2.26681e-20	1.8077e-94	2.8299e-07	0.000196482	6.9135e-21	2.75018e-12	4.8718e-36	1.469e-104	3.21653e-08	4.7307e-122	5.94742e-33	1.3918e-56	8.57524e-26
M_10mos_IPC	7.61157e-118	9.26474e-73	3.7925e-21	4.50482e-97	6.70756e-07	0.000118366	7.41181e-22	1.33715e-11	2.28e-38	4.51715e-107	4.13652e-08	4.62976e-120	2.32216e-32	3.42672e-58	1.34176e-25
M_10mos_STC	2.09386e-118	4.49895e-72	7.25944e-21	7.31052e-95	2.43026e-07	0.000519443	2.58063e-21	1.05705e-11	4.75446e-37	1.69514e-106	4.14947e-08	1.22453e-121	5.07039e-34	2.81393e-61	1.46248e-25
M_10mos_DFC	1.75031e-120	3.97719e-71	4.30928e-20	1.89654e-94	3.03326e-07	0.000194832	1.16322e-20	7.71373e-12	8.58115e-36	3.79529e-109	3.44056e-08	1.08119e-121	3.64379e-33	4.21465e-57	1.6836e-25
M_10mos_OFC	2.68852e-120	9.33925e-73	7.51884e-21	2.44122e-95	2.01102e-07	0.000312967	1.86175e-20	6.2623e-12	3.00198e-35	3.47226e-108	2.02559e-08	2.07183e-127	4.12173e-34	1.45518e-56	1.5444e-25
M_10mos_MFC	2.81536e-121	9.62509e-77	1.09471e-21	3.29796e-98	3.31101e-07	0.000274352	7.82197e-23	1.87138e-11	4.31005e-38	5.50444e-110	3.35586e-09	5.25017e-126	1.30352e-34	1.06152e-59	1.33868e-25
M_10mos_CBC	3.33537e-118	9.17924e-80	8.77865e-21	4.8304e-97	1.67148e-05	0.000295155	1.46288e-20	1.15558e-09	6.6755e-38	2.52064e-100	9.4557e-10	3.48148e-117	7.52919e-28	4.24505e-60	2.02305e-26
M_10mos_ITC	6.3086e-119	1.95621e-74	7.69243e-22	3.09614e-92	2.45922e-07	0.000386226	9.60851e-22	7.725e-12	1.79169e-36	5.63358e-105	3.52915e-08	6.92859e-126	8.15929e-35	1.75557e-54	1.30317e-24
M_10mos_MD	5.45052e-112	5.41856e-62	9.59176e-19	2.99057e-95	1.8231e-07	0.000346142	7.55914e-22	2.98534e-10	2.34737e-35	1.25143e-107	1.74743e-07	3.56612e-112	1.12803e-29	1.33176e-57	1.08523e-25
M_10mos_V1C	2.64222e-121	1.06291e-76	2.88349e-21	2.14437e-97	2.99453e-07	0.00120002	1.27947e-21	4.94334e-12	1.01718e-37	2.27386e-108	3.52342e-09	1.78513e-124	5.37854e-34	2.27189e-51	7.76903e-26
F_1yrs_AMY	2.54515e-123	4.48233e-82	4.42951e-22	1.5473e-100	1.07177e-07	0.000174899	6.89835e-22	1.49863e-10	2.98688e-37	2.12314e-113	9.03721e-09	3.80085e-126	5.19169e-38	1.42518e-61	1.49681e-28
F_1yrs_M1C	1.29106e-117	1.03364e-81	2.3162e-19	1.36462e-91	2.06174e-07	0.000205473	1.50686e-20	3.71131e-10	1.08442e-36	1.10108e-101	8.21661e-10	2.55098e-118	1.41717e-37	8.93887e-56	5.0755e-27
F_1yrs_DFC	7.31302e-128	5.05025e-87	6.92328e-22	4.21079e-102	7.37047e-08	6.24672e-05	8.47043e-22	1.70804e-10	1.86415e-39	1.67352e-109	6.63159e-10	1.17651e-131	9.70803e-38	2.09226e-58	6.85619e-29
F_1yrs_STC	2.33789e-128	8.89101e-89	2.3001e-22	3.81065e-102	8.33439e-08	0.00013564	7.18006e-22	1.60355e-10	4.7977e-37	8.07301e-112	5.58455e-10	1.20849e-132	5.36161e-37	4.82254e-56	8.0049e-29
F_1yrs_V1C	1.34988e-130	1.78421e-89	7.01136e-23	3.89091e-101	4.44342e-08	0.000140598	3.13189e-22	6.55905e-11	5.57743e-37	2.76683e-114	1.98042e-10	5.17072e-129	2.09559e-37	1.49023e-56	1.18019e-29
F_1yrs_MFC	5.68696e-123	2.82129e-84	9.87695e-22	5.05335e-99	1.39603e-07	1.81466e-05	5.31799e-21	3.76251e-10	2.36282e-36	4.86187e-110	5.38569e-10	5.17126e-129	5.13692e-36	4.5257e-58	2.60879e-28
F_1yrs_OFC	1.43981e-125	8.94717e-83	5.43049e-22	6.54719e-101	5.83952e-08	9.47281e-05	4.11037e-22	7.6961e-11	5.6236e-38	1.78185e-112	6.15212e-09	4.48769e-131	1.21585e-36	1.20462e-63	3.58357e-28
F_1yrs_ITC	1.68798e-128	6.16183e-88	1.96049e-22	2.08153e-102	6.37012e-08	0.000145118	1.24425e-21	2.9318e-11	3.59802e-38	1.04528e-113	2.33886e-10	1.45165e-131	8.06402e-38	1.05096e-58	5.4565e-29
F_1yrs_S1C	3.49821e-129	1.36942e-88	3.37292e-23	1.79947e-102	4.85313e-08	0.000173918	2.17007e-21	3.49821e-11	1.26662e-38	1.74733e-111	1.21434e-09	1.13246e-132	2.56545e-37	8.76213e-58	7.22793e-29
F_1yrs_VFC	2.86242e-128	1.02251e-87	1.9751e-23	4.68641e-103	6.23043e-08	0.000238223	1.91537e-21	8.46247e-11	4.21359e-38	1.93095e-113	2.69511e-10	9.47151e-132	2.40098e-38	1.02215e-58	2.16682e-29
F_1yrs_CBC	1.13708e-121	2.91085e-82	9.84557e-22	7.44707e-100	6.03187e-06	1.88383e-05	2.88234e-20	3.9794e-10	2.38204e-37	1.51929e-105	1.16375e-10	3.12837e-121	9.9616e-33	1.9933e-67	3.9481e-29
F_1yrs_A1C	9.62191e-127	2.70894e-88	1.32007e-22	8.36109e-100	8.50141e-08	0.000334642	1.60693e-21	9.56563e-11	1.83917e-37	2.28857e-112	1.38224e-09	1.50004e-129	2.47668e-38	1.30375e-60	3.19407e-29
F_1yrs_MD	9.5027e-120	2.34152e-77	4.75153e-20	2.11974e-100	5.22016e-08	2.83077e-05	1.39639e-23	6.0952e-10	3.43422e-34	4.22104e-113	2.53473e-09	1.43454e-117	1.90454e-35	1.69574e-57	7.02295e-29
F_1yrs_HIP	2.20897e-123	1.08005e-81	2.30579e-21	1.57308e-102	2.48859e-07	0.000153362	1.65043e-21	1.5982e-10	9.35565e-36	4.7953e-116	2.37664e-09	1.00703e-121	3.24637e-37	2.12481e-64	1.59372e-28
F_1yrs_IPC	8.72863e-128	1.7224e-87	9.55256e-23	4.79678e-102	5.99632e-08	6.7998e-05	1.47811e-21	2.24932e-11	5.57714e-38	1.96897e-111	3.27333e-10	2.53476e-132	1.19564e-38	5.20188e-55	3.08256e-29
F_1yrs_STR	9.34932e-123	4.59809e-81	1.16086e-21	2.6066e-98	8.76515e-08	1.70905e-05	1.10014e-21	1.5288e-10	2.34872e-36	1.38423e-110	3.14254e-09	1.28073e-126	4.27398e-35	1.24574e-58	1.97871e-26
F_2yrs_VFC	1.55301e-111	4.7814e-60	4.91818e-18	4.6049e-92	6.95236e-07	0.000297614	1.58099e-21	7.0808e-11	1.3545e-34	1.15596e-92	4.3933e-07	1.08428e-109	1.06717e-30	6.14051e-80	9.86741e-24
F_2yrs_IPC	6.11967e-113	5.0771e-66	1.13747e-16	3.86116e-88	5.0296e-07	0.00029684	3.70277e-22	5.91959e-10	2.40855e-31	1.46979e-91	9.86469e-08	7.74799e-105	2.45754e-29	1.76738e-65	1.38295e-23
F_2yrs_S1C	4.77199e-111	3.07119e-62	1.24378e-17	1.03318e-91	9.6668e-07	0.000128326	2.71481e-21	1.3368e-10	2.96466e-34	4.77051e-93	1.3834e-07	1.0939e-108	3.17251e-30	5.31061e-78	1.04857e-23
F_2yrs_ITC	1.64117e-113	6.33373e-68	3.71047e-17	6.15332e-90	3.45776e-07	0.000761505	6.05079e-22	6.11669e-11	2.69299e-33	1.55686e-91	3.804e-08	1.90343e-106	6.35905e-32	2.41919e-71	1.33086e-23
F_2yrs_MD	1.22575e-110	2.06764e-58	4.25353e-17	4.02631e-87	2.60006e-07	0.000119725	1.00366e-21	8.26571e-10	1.15102e-30	1.0258e-90	7.43797e-08	2.1586e-99	4.70722e-27	8.01598e-76	3.16696e-24
F_2yrs_DFC	4.08091e-113	2.47476e-62	8.18768e-19	5.23886e-91	6.15376e-07	7.63113e-05	3.60624e-22	1.44599e-11	6.65927e-34	5.56406e-95	1.47183e-07	1.95368e-106	2.66854e-31	3.70421e-76	1.10714e-24
F_2yrs_MFC	1.08926e-112	1.28444e-66	2.90495e-18	4.10475e-90	4.80183e-07	0.000145393	1.98875e-21	1.74288e-10	5.04469e-32	3.79484e-92	6.84589e-08	4.62644e-110	2.15654e-31	1.7748e-68	3.42317e-23
F_2yrs_CBC	3.58324e-117	3.73654e-66	2.73708e-19	4.31081e-94	4.03974e-06	3.3276e-05	1.39084e-20	1.10387e-09	4.94367e-37	3.99086e-101	5.05979e-09	2.1146e-115	1.17856e-30	1.89694e-68	3.26846e-26
F_2yrs_HIP	1.03859e-107	1.94656e-57	5.66536e-17	3.8522e-89	7.61241e-07	0.000160593	2.02044e-21	2.08464e-10	6.22775e-33	4.19292e-96	8.16561e-07	2.17159e-104	2.41102e-30	7.70368e-73	2.05039e-24
F_2yrs_OFC	1.04098e-115	1.38603e-65	6.77521e-17	8.40753e-94	2.63111e-07	5.87887e-05	8.12146e-22	1.62749e-10	2.59578e-32	1.07813e-95	1.35862e-07	2.52296e-113	1.90359e-32	4.71101e-69	8.26233e-25
F_2yrs_V1C	6.00008e-117	5.13954e-65	5.80267e-18	7.68886e-93	1.8747e-07	7.8555e-05	2.13453e-22	2.14944e-11	1.15141e-34	4.39672e-97	4.5632e-08	2.30429e-110	1.60125e-32	9.62212e-76	2.55615e-24
F_2yrs_STC	4.4063e-114	1.23387e-66	1.32281e-19	8.78643e-91	1.81667e-06	5.28801e-05	1.77506e-21	1.12855e-10	5.0225e-33	1.90995e-94	7.73132e-08	5.04406e-109	2.34079e-29	2.01291e-69	1.7169e-24
F_3yrs_STR	8.51733e-109	7.29395e-64	5.39662e-19	5.51892e-90	5.05074e-07	6.94036e-05	8.04918e-22	1.72209e-11	6.85335e-34	2.35219e-96	2.39762e-07	3.64083e-110	9.64478e-28	7.75833e-76	8.38898e-25
F_3yrs_STC	1.40302e-117	7.87228e-71	1.78807e-20	7.70126e-100	1.32937e-07	2.6048e-05	6.12214e-22	2.40855e-11	8.90819e-36	1.80326e-102	7.04618e-08	1.07422e-120	8.8216e-34	6.03634e-74	2.02874e-26
F_3yrs_IPC	1.03733e-116	7.52505e-68	2.09115e-20	3.08622e-95	1.47136e-07	3.01303e-05	5.4075e-21	1.58019e-11	1.01874e-33	2.11277e-103	5.52812e-08	3.60144e-118	3.03986e-33	6.38585e-69	2.20212e-26
F_3yrs_ITC	6.23815e-118	9.50753e-71	1.07892e-20	2.91793e-95	6.94237e-08	1.31468e-05	2.64026e-22	1.17944e-11	1.49602e-36	6.78579e-103	1.3414e-07	1.84614e-119	2.10081e-33	1.81549e-70	1.24378e-25
F_3yrs_CBC	9.87332e-116	5.75394e-75	5.47507e-21	8.53998e-91	2.00317e-05	2.60925e-05	4.79688e-22	3.7779e-09	3.08194e-35	1.88909e-94	1.38904e-09	3.04764e-116	3.30311e-29	4.19968e-66	7.07384e-26
F_3yrs_AMY	4.54571e-114	2.43047e-67	6.15382e-20	7.53025e-93	5.26733e-07	4.28491e-05	8.73846e-21	8.48739e-12	3.85647e-34	1.61468e-101	2.53157e-07	7.47518e-113	5.1123e-31	1.14001e-74	1.96787e-26
F_3yrs_VFC	4.69293e-116	2.97555e-65	1.23634e-20	1.71066e-93	1.34492e-07	1.33688e-05	1.21777e-20	7.20433e-12	9.68586e-34	3.57499e-105	2.06877e-07	1.55127e-115	1.95502e-32	1.87168e-69	2.27155e-25
F_3yrs_M1C	2.44718e-118	3.23891e-71	3.81671e-20	2.95305e-95	1.01181e-07	1.93843e-05	3.92321e-21	8.49501e-12	1.70436e-34	2.29788e-106	9.06652e-08	1.90448e-118	2.01027e-33	1.06488e-66	1.77748e-26
F_3yrs_A1C	7.39431e-118	1.47105e-67	1.11828e-20	1.22886e-99	3.73875e-07	4.23167e-05	2.14946e-22	3.18456e-11	3.5264e-36	7.68941e-104	3.10954e-07	2.39977e-118	1.69673e-34	6.78339e-76	1.15706e-25
F_3yrs_MD	3.14242e-113	4.11812e-63	6.17719e-19	4.29593e-97	1.24948e-07	8.33797e-05	8.43175e-23	1.06783e-10	6.05653e-34	8.06139e-102	9.76572e-08	9.0038e-113	2.50474e-29	4.37446e-79	3.48175e-26
F_3yrs_V1C	5.58425e-119	8.30834e-72	5.69634e-20	3.23326e-98	7.23235e-08	0.000105369	3.36293e-22	1.9458e-11	7.84578e-36	2.98518e-105	3.32256e-08	1.16131e-119	3.64986e-34	2.14177e-69	1.08398e-25
M_3yrs_OFC	2.64858e-116	3.30058e-71	2.215e-19	3.16197e-93	1.43147e-07	0.000194202	1.62323e-21	1.65113e-11	1.04486e-35	1.39358e-103	2.84207e-08	3.13086e-115	1.89488e-32	3.0013e-68	2.94402e-26
M_3yrs_MFC	8.11267e-116	1.03345e-70	7.33106e-20	1.50382e-92	1.86232e-07	0.000660671	5.78989e-21	7.55274e-11	1.41771e-33	2.63946e-102	3.62823e-08	7.27529e-112	8.09487e-32	2.40134e-70	1.8093e-26
M_3yrs_M1C	2.51128e-115	1.70609e-69	9.09183e-19	2.32924e-92	5.05185e-07	4.89925e-05	9.93712e-21	9.34912e-12	3.17787e-33	2.88289e-104	1.13259e-07	1.31309e-114	1.328e-31	7.47014e-70	2.5253e-26
M_3yrs_S1C	2.16642e-115	1.13038e-67	2.32433e-19	9.86887e-93	2.1564e-07	9.15362e-05	2.53449e-21	1.31324e-11	3.95045e-35	7.58903e-101	6.71697e-08	3.35566e-114	1.39106e-31	4.33721e-71	9.26825e-26
M_3yrs_STC	2.05497e-116	7.49442e-72	1.59285e-19	1.16117e-93	1.24586e-07	8.02024e-05	3.94615e-20	8.66862e-12	1.61417e-34	6.93317e-103	1.55626e-08	3.38416e-117	9.60059e-33	2.81056e-65	6.34317e-27
M_3yrs_IPC	4.14386e-116	6.51366e-68	7.90555e-19	2.97236e-93	1.91712e-07	0.000374182	3.5301e-21	7.0317e-12	3.51048e-34	1.69499e-101	6.19253e-08	1.84414e-111	3.7251e-31	4.3021e-69	2.16378e-26
M_3yrs_A1C	7.92392e-115	1.24411e-69	1.06779e-19	4.09697e-92	2.35961e-07	0.000403151	1.52891e-20	1.76602e-11	4.35046e-33	3.95694e-101	8.96123e-08	3.28383e-115	5.91351e-31	1.49071e-66	2.37469e-26
M_3yrs_CBC	4.93885e-118	3.47655e-77	1.43485e-19	3.45991e-90	2.53705e-05	0.000118141	7.99565e-20	1.85764e-09	4.39592e-36	1.70189e-98	4.0731e-10	9.35185e-117	1.19971e-30	4.78791e-64	2.73445e-27
M_3yrs_V1C	3.61688e-115	2.80661e-70	4.92944e-19	1.81327e-90	3.50986e-07	0.000570067	5.15208e-22	3.12317e-11	3.61157e-34	7.53101e-103	2.83766e-08	4.28009e-111	1.13612e-30	2.64883e-65	1.60756e-25
M_3yrs_AMY	1.29845e-114	1.77137e-70	5.27079e-20	6.97138e-95	1.9647e-07	0.000230434	1.68899e-20	5.11263e-11	3.80533e-34	2.73996e-103	8.22432e-08	2.16017e-112	9.41315e-32	4.97332e-68	8.94752e-26
M_3yrs_VFC	1.34173e-115	2.04929e-66	3.8652e-19	7.1573e-94	1.93742e-07	0.000410899	2.12905e-21	2.57816e-11	4.55555e-35	5.89832e-100	1.15961e-07	6.19713e-118	1.6937e-31	1.83005e-73	1.3344e-25
M_3yrs_DFC	5.92924e-119	1.1207e-75	8.55807e-20	2.10173e-97	7.20125e-08	0.000146458	9.03448e-22	9.54627e-12	2.60527e-36	7.37664e-105	1.85955e-08	3.73219e-116	3.27532e-34	1.60637e-68	2.72126e-26
M_3yrs_HIP	1.17208e-113	4.24183e-67	1.36503e-18	6.90947e-91	6.51753e-07	0.000323364	4.26211e-20	1.26683e-10	7.6243e-34	5.52561e-99	6.71017e-08	3.71182e-109	5.78487e-30	1.89236e-62	3.46518e-25
M_3yrs_ITC	8.52543e-116	3.35841e-72	2.02922e-20	1.55343e-91	1.94443e-07	0.000609713	1.29857e-20	8.61431e-11	5.38895e-35	1.16605e-101	2.14512e-08	2.06053e-113	3.26209e-32	4.82841e-65	1.56139e-26
M_4yrs_AMY	3.77417e-111	2.21661e-58	4.32434e-19	2.31492e-91	1.61176e-06	0.000507982	3.24434e-21	4.11774e-11	6.79772e-35	1.49483e-103	9.70118e-07	7.1432e-114	3.23666e-32	2.67297e-64	2.23976e-24
M_4yrs_STR	1.20812e-108	2.79134e-58	1.26229e-18	8.5368e-92	5.97414e-07	0.00021297	1.68097e-20	5.51281e-11	6.52662e-34	1.03737e-100	1.07745e-06	7.23709e-112	3.79968e-31	3.06126e-62	1.04318e-23
M_4yrs_VFC	4.49364e-114	1.88404e-64	1.85113e-20	3.82151e-91	7.98587e-07	4.37261e-05	1.57022e-21	4.13036e-12	3.2881e-34	4.26369e-105	3.57964e-08	1.78597e-115	3.1527e-35	1.42709e-58	2.04738e-26
M_4yrs_DFC	5.51133e-109	9.66913e-57	2.11805e-19	1.09872e-89	1.72127e-06	0.000506626	8.58717e-21	4.08526e-11	1.01334e-34	2.36548e-101	5.73489e-07	4.33303e-108	3.58716e-31	5.50981e-69	2.85775e-23
M_4yrs_STC	1.31828e-110	1.59724e-59	2.75067e-19	1.17634e-89	2.01813e-06	4.31662e-05	1.30714e-19	1.41271e-11	3.5765e-32	2.25365e-102	7.85754e-07	7.7467e-111	2.19219e-32	4.06945e-62	6.68123e-25
M_4yrs_CBC	9.20196e-107	4.27931e-58	1.08806e-17	5.99063e-90	1.49318e-05	0.00014636	1.81306e-20	2.53993e-09	3.85135e-33	4.10947e-97	9.96533e-08	1.44108e-105	3.2311e-28	3.85655e-68	3.59667e-25
M_4yrs_MD	2.08598e-111	1.13014e-60	1.47832e-18	1.64958e-95	1.9398e-07	9.34505e-05	8.12014e-23	5.9718e-11	2.67949e-32	1.72118e-107	3.49025e-08	1.61238e-110	6.68913e-32	3.24643e-63	2.43967e-26
M_8yrs_ITC	1.86084e-110	4.97563e-61	1.06402e-19	5.04094e-91	6.75844e-07	1.97685e-05	5.4204e-20	5.78419e-12	3.66788e-32	1.29369e-100	1.26375e-07	2.19497e-111	2.49671e-33	9.48235e-60	6.29136e-26
M_8yrs_S1C	2.33823e-110	1.58923e-56	1.25033e-18	1.37774e-89	8.10947e-07	4.02998e-05	1.96122e-21	1.433e-11	1.50268e-34	2.78208e-98	3.56204e-07	9.21802e-114	2.07486e-32	8.39961e-67	1.66943e-24
M_8yrs_IPC	3.52248e-112	1.47645e-58	1.87521e-17	1.21953e-92	5.96891e-07	6.56651e-05	5.05508e-21	2.65241e-12	2.17189e-36	5.32863e-102	1.92549e-07	5.8068e-112	8.61285e-34	5.4499e-64	6.49144e-26
M_8yrs_V1C	2.83014e-114	1.1333e-63	9.44779e-20	1.01645e-93	3.38134e-07	4.64377e-05	1.54383e-21	3.08398e-12	2.81483e-34	6.4259e-105	3.66176e-08	1.94427e-119	1.30864e-34	1.21104e-64	7.47888e-27
M_8yrs_STC	1.93271e-110	1.59732e-61	9.952e-20	2.27093e-90	4.50764e-07	9.74033e-05	1.5921e-20	9.2832e-12	1.59331e-33	1.48407e-103	1.3575e-07	5.744e-114	1.09241e-33	8.32371e-65	2.77283e-25
M_8yrs_MD	2.7961e-114	9.65853e-70	1.10703e-19	6.62381e-99	1.14475e-07	5.57803e-05	6.61369e-22	8.06317e-10	3.52589e-34	2.50425e-110	2.92188e-09	2.73698e-111	4.46642e-33	2.30949e-66	5.21743e-27
M_8yrs_VFC	2.16938e-110	1.59532e-61	2.22333e-19	5.41098e-94	6.09465e-07	6.68605e-05	6.39729e-21	4.37465e-12	2.0326e-36	3.37152e-101	5.2796e-08	3.40133e-114	1.08689e-33	7.72769e-65	1.75891e-24
M_8yrs_HIP	9.62454e-116	1.49138e-70	5.77213e-20	4.89002e-99	4.50729e-07	2.14071e-05	1.44979e-20	9.48246e-11	2.18419e-36	7.66914e-107	9.65532e-09	3.49546e-118	1.12525e-33	1.69078e-64	2.28778e-27
M_8yrs_AMY	2.32769e-114	3.29183e-67	1.79226e-19	6.28011e-93	3.73073e-07	3.25224e-05	2.3391e-20	2.97038e-11	2.67932e-33	5.83973e-106	2.45305e-08	1.28723e-116	1.14659e-32	3.4143e-68	3.11526e-27
M_8yrs_M1C	6.9608e-109	6.30702e-58	4.48144e-19	2.47797e-91	3.68843e-06	4.37579e-05	9.08065e-20	3.78241e-11	1.77299e-34	1.18978e-98	1.77368e-07	8.70638e-109	6.36424e-34	1.20421e-68	3.51066e-25
M_8yrs_CBC	7.22266e-115	2.29474e-64	1.55625e-20	8.80609e-99	5.54655e-06	7.00345e-05	1.98994e-21	8.50018e-10	2.08397e-37	7.24175e-104	4.34612e-08	7.06361e-112	1.88926e-30	1.05917e-73	7.30922e-25
M_8yrs_DFC	8.03188e-113	7.95141e-67	7.7654e-20	6.17403e-93	3.46324e-07	0.000141277	3.6884e-21	1.51752e-11	6.21886e-35	6.842e-102	1.79878e-08	1.50267e-117	9.98116e-34	6.20726e-67	3.53777e-26
M_8yrs_STR	8.14487e-107	2.768e-57	2.57639e-18	1.01439e-91	4.10198e-07	4.07749e-05	1.86548e-21	5.08044e-11	1.24342e-31	1.11002e-98	2.09558e-07	4.81234e-111	1.15679e-30	1.25428e-67	2.71759e-24
M_8yrs_A1C	6.71188e-113	4.41824e-61	8.77023e-20	8.22188e-95	4.47113e-07	7.67836e-05	2.31036e-21	4.54343e-11	1.1905e-35	4.36543e-104	5.26477e-08	1.88357e-118	4.73365e-34	7.98092e-66	1.5485e-25
M_8yrs_MFC	3.50272e-111	7.52656e-59	2.61877e-18	5.9773e-92	7.56116e-07	2.36042e-05	1.23862e-20	2.78546e-12	4.15542e-34	1.87841e-105	1.74477e-07	3.05038e-112	9.4936e-35	1.0849e-67	9.84278e-26
M_8yrs_OFC	1.91735e-116	1.06132e-68	2.84974e-19	1.45461e-95	2.33345e-07	6.54249e-05	6.04484e-21	2.80074e-12	1.91023e-37	7.616e-107	1.31141e-08	1.7053e-116	2.46837e-35	1.30446e-68	1.24669e-26
M_8yrs_MFC.1	2.16329e-100	1.65973e-65	7.13266e-16	2.16197e-77	2.59965e-06	0.000502273	3.25133e-18	2.70483e-11	3.36691e-30	8.75994e-91	6.36494e-08	1.17332e-102	2.0797e-32	2.23258e-45	1.74371e-23
M_8yrs_CBC.1	2.81859e-127	1.27691e-86	7.01911e-22	2.89949e-103	3.10858e-06	0.000141926	2.48274e-21	7.39641e-11	7.99028e-39	2.29937e-111	3.07067e-10	1.56747e-125	4.33477e-36	4.75084e-70	1.01014e-29
M_8yrs_A1C.1	7.94213e-129	1.28099e-89	6.24623e-23	3.99624e-106	4.66532e-08	0.000373505	1.3545e-21	7.60308e-12	1.04383e-38	5.39536e-115	2.84806e-09	2.35686e-129	2.82365e-40	1.63387e-63	4.51542e-30
M_8yrs_VFC.1	1.43716e-126	1.05557e-84	5.19342e-22	1.06975e-101	3.17041e-07	0.000117061	1.57173e-21	1.79877e-12	8.12882e-37	7.34492e-116	1.4042e-09	2.32964e-131	3.24898e-40	1.32056e-59	1.5415e-28
M_8yrs_HIP.1	1.69491e-117	1.29106e-74	3.05034e-21	2.12802e-96	4.3428e-07	0.000120571	7.47123e-20	3.59764e-11	1.21383e-34	1.0599e-111	2.15633e-08	1.72167e-121	2.75768e-36	8.29351e-62	4.84905e-27
M_8yrs_AMY.1	2.46497e-127	2.10796e-83	3.39716e-22	3.69306e-103	6.2155e-08	0.000223629	6.97665e-22	2.50236e-12	1.03226e-38	1.50622e-115	5.8594e-09	3.20987e-131	3.12609e-39	4.07348e-61	5.34151e-28
M_8yrs_V1C.1	1.19183e-131	7.66418e-91	1.3658e-23	4.31578e-105	4.46014e-07	0.000168516	5.52806e-22	2.78678e-12	3.79785e-39	9.06591e-118	6.85136e-11	8.7502e-128	4.08598e-41	7.65801e-65	2.83751e-29
M_8yrs_IPC.1	8.27178e-127	7.98892e-87	4.81215e-22	1.04e-100	4.72914e-08	0.000130814	4.68062e-21	2.47459e-12	1.71049e-37	1.18603e-115	1.1774e-09	1.56244e-127	2.22698e-40	5.16296e-62	5.05713e-30
M_8yrs_DFC.1	1.60424e-108	1.22531e-72	1.12328e-17	4.56589e-84	3.84453e-07	0.000712111	7.72574e-20	1.54992e-11	8.39262e-31	2.69462e-95	8.63483e-09	1.27838e-108	3.5187e-34	3.50059e-54	1.83257e-24
M_8yrs_STC.1	8.93771e-131	1.49948e-90	1.80448e-22	4.16369e-105	4.82538e-08	0.000199886	2.62379e-22	7.16281e-12	4.04141e-38	2.13671e-116	3.98805e-10	9.04315e-134	4.85778e-43	4.12473e-63	4.23814e-29
M_8yrs_ITC.1	3.1339e-125	2.98909e-88	1.1571e-22	1.04001e-102	1.90531e-07	4.10885e-05	1.00239e-19	3.55771e-13	3.06643e-34	2.13788e-116	9.28717e-10	3.74115e-128	2.43036e-40	1.51974e-55	2.41215e-30
F_11yrs_VFC	4.77709e-124	9.67733e-79	4.36429e-20	3.01582e-98	1.44233e-07	0.000173256	4.01183e-22	1.96544e-11	8.06341e-37	2.23184e-108	2.73436e-09	4.06576e-128	1.78452e-36	5.15698e-56	1.31682e-27
F_11yrs_IPC	5.56317e-116	5.90159e-74	2.46163e-19	5.52028e-92	2.43174e-07	5.94358e-05	3.66391e-20	4.93013e-11	7.709e-35	2.88282e-103	1.34363e-09	5.26195e-116	9.14012e-35	5.31986e-53	8.73554e-27
F_11yrs_ITC	5.64127e-115	1.68665e-69	3.17891e-21	1.41254e-91	2.93504e-07	6.71365e-05	1.26739e-19	2.0808e-12	2.11404e-32	2.07393e-109	3.31823e-08	4.88902e-116	3.50974e-34	2.43245e-52	2.81037e-27
F_11yrs_STC	2.52942e-120	6.01862e-73	1.54592e-19	1.72561e-94	1.28779e-07	9.34338e-05	4.43149e-21	2.74928e-12	9.69058e-35	1.85234e-109	3.44873e-08	4.81021e-121	7.01465e-36	7.33107e-55	3.79267e-28
F_11yrs_S1C	5.6689e-121	7.33313e-78	1.69638e-21	3.25034e-95	1.52643e-07	0.000146744	3.41493e-20	2.32367e-11	7.32303e-35	4.93091e-110	7.54286e-09	1.46084e-127	4.59381e-36	9.05471e-52	3.12141e-28
F_11yrs_DFC	2.95478e-124	2.60269e-80	3.5258e-22	3.03863e-97	1.24395e-07	0.000179925	6.79302e-22	2.59989e-11	4.33328e-37	1.46468e-108	3.80115e-09	3.43851e-129	6.98735e-37	1.10767e-54	2.27739e-27
F_11yrs_AMY	2.26755e-120	8.90021e-75	8.26964e-21	1.64887e-94	1.02921e-06	0.000224704	2.33047e-21	6.93396e-11	1.14239e-35	2.43998e-108	2.38722e-09	1.99215e-122	2.57699e-34	5.90777e-53	1.33684e-27
F_11yrs_V1C	1.53058e-123	2.95527e-79	2.13405e-21	3.686e-94	1.53181e-07	0.000733296	1.87716e-21	1.23734e-10	4.80585e-37	2.0655e-106	3.16952e-09	3.32082e-124	3.88973e-35	6.85088e-56	1.52332e-27
F_11yrs_CBC	3.5203e-121	9.0854e-82	2.98478e-18	2.16588e-93	4.27386e-05	0.00168721	3.03613e-20	1.68722e-09	2.06997e-34	5.30213e-103	5.73151e-11	3.6501e-115	5.2566e-31	3.87018e-54	7.82836e-28
F_11yrs_A1C	3.89195e-125	1.6462e-84	1.01455e-20	7.37899e-99	1.97066e-07	0.000148725	1.19836e-20	4.69481e-11	9.85718e-37	5.2118e-111	5.92498e-10	7.61938e-127	7.42586e-36	4.25934e-51	5.27321e-29
F_11yrs_HIP	7.76294e-114	1.30717e-61	9.14327e-21	2.44532e-93	3.64443e-07	2.78179e-05	2.97568e-21	7.04332e-12	4.70588e-32	3.05904e-110	1.93915e-07	8.71616e-119	2.31937e-34	8.62313e-56	3.9174e-27
F_11yrs_M1C	1.62296e-122	5.90388e-77	4.99545e-21	1.28455e-95	1.40323e-07	0.000187051	7.29005e-22	9.10986e-11	5.07321e-37	4.33743e-107	1.70198e-08	1.58012e-128	6.26118e-36	2.65886e-57	1.68199e-27
F_11yrs_OFC	1.27614e-121	1.8931e-77	6.15886e-20	1.17198e-94	1.1855e-07	4.1609e-05	2.51703e-20	1.85687e-11	3.45721e-36	1.93274e-106	1.18179e-09	2.13172e-124	3.33341e-35	2.08396e-53	1.24453e-27
F_11yrs_MFC	1.94384e-121	6.03312e-79	2.17027e-20	4.59455e-94	1.60862e-07	0.000154569	1.75004e-21	5.26183e-11	4.06052e-36	3.45766e-110	8.07016e-09	4.18737e-128	2.54009e-36	1.56591e-54	3.1457e-27
F_13yrs_MFC	6.93885e-119	3.53427e-75	2.48844e-20	1.9726e-93	3.14499e-07	0.000249187	2.11585e-22	3.40693e-11	6.11777e-34	2.88884e-106	3.01377e-08	1.56428e-124	6.88009e-35	1.15787e-58	8.72252e-28
F_13yrs_IPC	9.98432e-121	1.09168e-78	1.09246e-20	1.40064e-95	1.27172e-07	0.000457008	4.47832e-22	2.38007e-11	1.87457e-37	1.14336e-103	3.44553e-09	6.84431e-129	1.83931e-36	6.54059e-65	5.25933e-27
F_13yrs_VFC	6.1422e-119	8.97348e-78	1.55135e-21	6.98444e-95	1.79528e-07	9.66258e-05	2.04407e-22	2.95797e-11	7.37638e-37	1.91976e-106	4.87936e-09	3.76022e-125	4.43082e-35	2.00726e-59	3.80025e-27
F_13yrs_A1C	1.48293e-121	7.02063e-79	9.48851e-20	2.2828e-94	3.32546e-07	0.000267155	9.02499e-22	7.17508e-11	5.59063e-36	1.41045e-103	1.81929e-09	4.27572e-125	6.73319e-36	4.97077e-61	7.97847e-28
F_13yrs_ITC	2.86369e-120	1.52076e-78	6.17633e-21	5.11716e-96	1.24686e-07	0.000267088	4.23382e-23	3.87356e-11	1.00493e-36	1.24073e-103	1.6607e-08	1.5344e-126	1.00185e-35	2.01552e-64	1.08855e-26
F_13yrs_STC	2.16699e-120	2.10645e-78	1.84841e-21	1.76575e-97	2.12806e-07	0.000168024	1.33102e-23	1.48967e-11	1.04281e-38	8.21819e-106	8.4847e-09	7.91188e-126	3.23553e-36	9.41304e-65	1.95921e-27
F_13yrs_CBC	2.00621e-119	1.6225e-76	3.36488e-19	3.50906e-90	8.97246e-06	1.61557e-05	5.45725e-21	4.41282e-09	5.25894e-34	3.92097e-101	2.88871e-10	1.01913e-116	4.01323e-31	4.14556e-60	3.73376e-27
F_13yrs_V1C	2.88688e-119	1.312e-73	6.74722e-20	5.32549e-92	2.04216e-07	0.000333978	8.79352e-23	3.11116e-11	1.36162e-36	1.742e-100	8.34911e-09	4.24089e-122	5.78742e-34	1.95764e-61	3.10527e-26
F_13yrs_S1C	1.38931e-120	3.91372e-78	9.41715e-20	7.95643e-96	2.11361e-07	5.55276e-05	8.27529e-23	3.08244e-11	2.77066e-37	9.9592e-108	3.82688e-09	1.37182e-125	4.46729e-37	1.74146e-63	3.26814e-27
F_13yrs_DFC	5.66244e-123	1.59266e-79	2.34722e-21	2.5816e-96	1.0436e-07	7.24333e-05	2.2517e-22	4.73443e-11	2.50058e-37	2.9963e-107	1.3913e-08	1.0069e-127	1.627e-37	3.35816e-63	5.21982e-28
F_13yrs_OFC	2.86233e-121	1.50901e-77	3.13264e-20	1.38121e-96	1.50715e-07	0.000130562	1.97294e-23	7.00815e-11	1.1824e-36	1.85579e-104	3.62996e-09	3.52958e-128	1.19552e-35	6.24192e-62	5.42341e-27
F_13yrs_MD	2.25138e-112	2.71635e-65	7.15004e-19	1.26089e-91	4.83931e-08	0.000153653	5.19377e-23	2.71001e-11	5.56259e-33	2.01094e-100	2.48405e-08	3.88999e-111	1.50824e-32	3.26564e-75	1.042e-26
F_13yrs_AMY	2.68886e-116	6.71061e-74	1.39525e-21	3.92451e-90	2.8075e-07	0.000181845	7.42293e-23	8.7139e-11	7.69085e-33	1.8689e-104	4.18071e-08	1.00488e-121	1.30449e-34	1.00733e-57	6.95714e-27
F_13yrs_M1C	1.5222e-122	2.87028e-80	8.03363e-21	7.99166e-97	1.55327e-07	0.000195415	4.53205e-22	5.18181e-11	3.41251e-36	3.14666e-108	9.46782e-09	2.51163e-125	1.7752e-37	1.92592e-58	7.00041e-28
F_13yrs_HIP	2.02452e-113	2.39972e-70	5.08903e-20	5.0863e-90	5.04786e-07	0.000467944	2.52168e-21	5.73957e-11	3.98178e-33	1.10033e-100	6.23666e-08	1.98378e-115	1.13066e-32	9.37601e-63	2.54666e-26
F_13yrs_STR	1.24683e-113	4.37114e-70	2.15884e-19	1.29112e-91	3.94968e-07	2.1204e-05	4.25355e-22	2.57638e-10	1.44101e-32	7.12586e-102	1.72864e-08	1.38694e-117	1.12284e-31	2.25734e-62	1.14507e-25
M_15yrs_IPC	1.9888e-121	1.68204e-84	1.83251e-21	3.84731e-93	1.05905e-07	7.28618e-05	1.66768e-20	5.93472e-11	5.34078e-35	3.5795e-108	1.48522e-09	8.74196e-125	5.19756e-37	5.40322e-52	1.3451e-28
M_15yrs_CBC	3.17723e-115	7.61739e-75	1.48761e-20	1.09675e-93	2.05568e-05	5.99557e-05	3.62246e-20	6.05049e-09	1.2285e-35	1.50945e-103	4.76552e-10	1.0918e-115	1.1583e-30	5.35925e-68	1.70359e-27
M_15yrs_STC	5.19629e-122	2.01381e-82	1.95731e-21	8.22229e-99	1.54831e-07	0.000123485	9.60501e-21	8.09454e-11	2.37149e-36	3.0873e-110	1.14365e-09	3.20442e-124	8.67764e-37	4.63326e-53	1.17471e-28
M_15yrs_ITC	4.62179e-122	3.1598e-83	2.84327e-22	6.63911e-96	1.7101e-07	0.000326004	4.85865e-21	1.36099e-10	2.14348e-34	1.83527e-108	2.18012e-09	8.63736e-125	6.61313e-36	1.47771e-53	3.13814e-28
M_15yrs_AMY	2.4542e-122	6.18386e-82	6.74381e-22	9.93056e-96	1.88426e-07	4.34193e-05	5.105e-21	3.72127e-11	1.82205e-33	1.94765e-112	3.31734e-09	1.99426e-126	1.26595e-36	3.33642e-55	4.36661e-28
M_18yrs_HIP	3.26517e-114	2.98229e-65	4.47574e-18	3.22753e-92	1.16058e-06	0.000279937	5.42042e-21	3.49179e-10	7.01011e-34	4.85919e-99	6.86341e-08	8.45804e-110	6.52569e-32	3.53753e-66	7.77404e-26
M_18yrs_M1C	7.83016e-114	2.82301e-64	1.26806e-19	7.65431e-91	6.94475e-07	0.000530022	6.13071e-22	2.3459e-11	1.5265e-34	4.13382e-100	1.35916e-07	9.20933e-114	5.54567e-32	7.77432e-71	1.08528e-24
M_18yrs_V1C	5.9865e-116	4.85904e-70	1.18779e-19	1.14693e-91	6.16906e-07	9.61601e-05	2.72032e-21	5.22429e-12	3.07973e-33	1.06665e-105	1.5565e-08	4.96978e-117	1.40171e-33	1.43268e-61	5.9065e-26
M_18yrs_A1C	1.5746e-113	6.75965e-65	1.40791e-19	1.12103e-91	6.34918e-07	0.000227068	4.34215e-21	1.65413e-11	3.90094e-34	1.77732e-98	1.04403e-07	3.27013e-111	2.35498e-30	4.36783e-68	3.63328e-25
M_18yrs_ITC	1.80706e-117	2.58545e-68	4.3105e-19	5.64051e-91	4.42361e-07	0.00024207	1.22353e-21	8.8121e-12	9.28891e-34	2.74372e-105	2.06552e-08	1.49266e-116	8.72858e-35	4.80269e-67	9.35174e-27
M_18yrs_VFC	1.88202e-117	3.94533e-70	3.67035e-19	6.5637e-93	4.23447e-07	5.40835e-05	8.59888e-22	1.3353e-11	4.53206e-36	3.49163e-105	1.19996e-08	3.00863e-120	2.90923e-34	1.59111e-63	8.23906e-26
M_18yrs_MFC	3.0147e-116	2.12138e-67	3.41522e-20	8.86544e-91	4.71016e-07	0.000207577	1.91086e-21	1.97719e-11	1.57667e-33	1.93221e-100	3.81203e-08	2.35214e-116	1.92336e-31	2.46089e-67	3.68569e-25
M_18yrs_STC	9.05963e-115	1.0174e-66	1.03166e-19	3.13488e-92	5.70915e-07	0.000135734	3.58825e-22	1.31814e-11	1.09156e-35	1.22007e-99	4.87617e-08	3.88103e-112	1.86719e-32	7.04123e-70	1.48875e-25
M_18yrs_DFC	3.15222e-118	3.6483e-74	9.56389e-21	4.0843e-95	3.28336e-07	2.68805e-05	6.97684e-22	1.01851e-11	4.83354e-35	8.86783e-108	4.56487e-09	4.91846e-122	4.19511e-35	8.75057e-62	3.60654e-27
M_18yrs_S1C	4.02438e-115	1.27831e-64	7.43637e-19	1.4469e-91	7.19333e-07	0.000415735	4.56635e-23	1.78261e-11	3.07877e-36	4.13761e-99	8.8193e-08	8.93404e-114	2.07607e-31	1.78848e-73	6.35056e-25
M_18yrs_IPC	9.03376e-117	5.62766e-71	2.73742e-19	3.00722e-95	3.96463e-07	0.000115955	7.30859e-23	9.78636e-12	3.3971e-35	5.12508e-104	3.18323e-08	5.20018e-120	3.00922e-35	4.19475e-68	4.25257e-26
M_18yrs_OFC	3.4342e-116	5.96153e-68	4.43358e-20	6.73069e-92	3.00024e-07	1.7266e-05	1.18011e-22	2.75826e-12	1.58436e-36	7.99734e-102	3.29145e-08	1.63829e-119	7.09596e-34	6.41507e-66	1.00469e-25
M_18yrs_CBC	1.44598e-115	2.40197e-68	1.14242e-19	1.49264e-90	1.37699e-05	7.85369e-05	1.20303e-21	1.20076e-10	1.00878e-36	5.76354e-100	4.46599e-09	6.99203e-118	2.70151e-31	2.45676e-67	8.40215e-26
F_19yrs_STC	1.45474e-126	2.15129e-83	8.63454e-22	8.95484e-102	1.10653e-07	0.000666038	1.69379e-23	7.41138e-11	1.20892e-38	1.20894e-110	8.77484e-10	9.30481e-131	7.98867e-38	4.61803e-63	8.82244e-29
F_19yrs_CBC	2.00439e-122	3.66866e-77	3.6132e-20	5.08929e-95	7.2962e-06	6.39367e-05	1.51235e-23	6.46829e-10	2.83051e-36	1.32293e-107	4.15675e-10	3.80182e-120	3.83521e-33	7.74132e-67	8.38859e-28
F_19yrs_DFC	2.62374e-125	2.32692e-80	2.48381e-21	2.11031e-101	1.19292e-07	0.000220783	6.57722e-23	1.2876e-10	3.30377e-39	8.17401e-109	6.2156e-09	1.01385e-127	2.36792e-37	4.50082e-67	6.06094e-28
F_19yrs_AMY	4.21307e-122	2.64025e-72	4.04685e-20	1.37982e-100	1.75984e-07	0.000336049	2.43598e-25	1.0811e-10	4.41972e-38	2.11266e-110	1.81441e-08	1.58327e-126	1.23835e-35	6.66957e-71	1.13535e-26
F_19yrs_OFC	3.02512e-125	1.58083e-79	1.16697e-20	8.29908e-103	1.35798e-07	0.000155726	4.15651e-23	1.17553e-10	8.32028e-39	3.26964e-113	4.06441e-09	4.66342e-130	3.31988e-37	7.2217e-62	7.28458e-28
F_19yrs_ITC	4.03511e-123	4.05922e-76	3.17801e-20	1.07463e-98	1.0101e-07	0.000650825	1.52819e-23	4.54869e-11	8.96157e-38	3.84531e-109	7.98828e-09	3.44337e-130	8.51985e-37	2.26522e-69	4.02499e-27
F_19yrs_STR	2.40428e-120	1.34857e-77	3.19773e-20	2.99131e-97	2.09742e-07	7.88357e-05	3.35489e-21	1.29135e-09	1.54464e-32	2.09373e-108	1.76462e-09	4.3306e-122	1.93232e-34	2.46624e-58	4.95868e-28
F_19yrs_S1C	6.36666e-125	6.48323e-81	3.16194e-22	4.53917e-98	2.2563e-07	0.000471616	7.42073e-23	9.66077e-11	2.1652e-37	1.09278e-109	4.17778e-09	3.66921e-128	9.49128e-37	2.05149e-59	3.87954e-28
F_19yrs_M1C	7.36964e-124	1.80191e-76	2.46461e-21	3.46879e-100	2.84177e-07	0.000126224	2.68674e-23	1.30991e-10	3.21321e-40	1.46634e-110	2.10187e-08	8.64823e-128	2.23605e-37	6.12064e-67	3.7701e-28
F_19yrs_HIP	1.04653e-123	6.63339e-76	1.2582e-19	3.05995e-99	3.79288e-07	0.000388224	1.19998e-24	1.93168e-10	1.88926e-36	2.49864e-110	2.5196e-08	8.84599e-123	2.00424e-36	8.84669e-64	1.58516e-27
F_19yrs_A1C	3.14809e-127	1.99648e-79	1.07672e-22	5.16989e-96	3.48409e-07	0.000122304	2.23519e-22	4.7335e-11	2.76634e-36	7.21681e-110	8.5232e-10	8.87277e-129	4.00816e-37	5.13093e-58	1.32671e-28
F_19yrs_V1C	5.43911e-126	4.04208e-81	8.43216e-21	3.51354e-97	9.8794e-08	0.000930845	4.94404e-24	1.03551e-10	1.44478e-39	1.80306e-109	2.32701e-09	6.18528e-126	1.40611e-34	6.07998e-63	4.38601e-28
F_19yrs_IPC	4.37975e-127	1.91337e-83	1.16891e-21	2.82369e-97	1.63168e-07	0.000228345	2.81056e-22	5.95019e-11	4.29998e-37	8.33189e-112	3.95671e-10	6.81926e-131	2.21897e-38	1.2588e-58	6.50045e-29
F_19yrs_VFC	6.31376e-126	6.83044e-78	1.16281e-21	3.97973e-100	1.30773e-07	0.00084295	6.44903e-24	1.26347e-10	1.40145e-38	1.52298e-106	8.29745e-09	1.6095e-130	1.07936e-36	3.55796e-66	3.79037e-28
F_19yrs_MFC	9.32568e-124	1.18415e-79	5.54323e-21	2.94464e-98	1.71577e-07	0.000279303	3.60026e-23	3.43302e-10	1.06873e-36	2.04424e-110	3.66804e-09	1.25952e-127	6.47051e-37	4.20742e-58	6.25324e-28
F_19yrs_MD	2.51699e-121	1.43044e-72	1.47723e-20	3.04739e-102	1.12089e-07	0.000256322	1.48608e-24	1.81368e-09	8.26217e-36	5.49839e-111	7.29851e-09	3.97673e-117	1.20244e-34	2.48396e-64	1.08164e-28
F_21yrs_MFC	2.09228e-128	8.80637e-88	4.30905e-22	3.73976e-99	6.36284e-08	0.000118886	1.7686e-21	3.74535e-12	1.9418e-36	6.12715e-115	1.27449e-09	1.18775e-130	2.52391e-40	2.33153e-57	2.59084e-30
F_21yrs_M1C	8.95111e-129	1.12134e-87	1.73318e-22	4.53769e-103	1.54157e-07	5.13301e-05	3.04198e-21	3.781e-11	6.51647e-38	3.02716e-111	9.65731e-11	2.75122e-129	1.98531e-38	3.13406e-59	1.39672e-29
F_21yrs_A1C	3.40121e-126	3.10089e-86	1.07296e-22	4.6242e-102	1.07836e-07	0.000210317	7.18057e-21	2.32463e-11	6.66748e-38	1.84391e-114	8.31576e-10	4.85832e-130	8.03923e-38	3.29203e-57	1.61828e-29
F_21yrs_DFC	1.15949e-127	9.7098e-90	2.97879e-21	1.3962e-101	6.78781e-08	0.000124881	4.88463e-22	4.9218e-11	2.57851e-38	3.50068e-113	6.43337e-10	5.01901e-133	8.6788e-39	1.99133e-59	5.62957e-30
F_21yrs_AMY	1.22398e-122	1.14684e-80	3.55198e-22	1.53546e-98	1.15468e-07	3.52965e-05	9.58483e-21	3.4411e-11	6.29775e-36	1.36306e-112	2.07504e-09	1.40182e-128	3.34022e-37	1.27684e-58	7.01674e-29
F_21yrs_MD	1.99084e-119	2.9905e-77	1.9207e-20	3.16241e-98	1.39452e-07	1.45887e-05	3.45612e-22	3.39515e-09	1.00298e-33	4.25471e-108	3.91716e-10	2.21835e-115	6.6604e-34	1.00796e-59	5.47638e-29
F_21yrs_V1C	1.01781e-126	9.97964e-88	8.42742e-22	5.20209e-100	1.10838e-07	6.25245e-05	1.22728e-20	2.7739e-11	8.10959e-38	4.4304e-112	1.95489e-10	6.07615e-130	2.16842e-36	2.57589e-53	1.00256e-28
F_21yrs_STC	1.55415e-126	2.41007e-88	7.14311e-22	3.12151e-100	9.07666e-08	8.59515e-05	3.75844e-21	2.59918e-11	1.94825e-37	1.14004e-111	9.33201e-10	3.37985e-132	2.68396e-38	2.62443e-60	1.19941e-29
F_21yrs_VFC	4.02272e-128	4.46676e-92	1.09083e-22	1.87344e-100	8.06714e-08	6.06568e-05	2.23039e-21	1.33744e-11	1.41051e-36	6.94043e-114	2.70464e-10	2.14005e-129	1.45311e-39	9.63951e-55	7.19168e-30
F_21yrs_CBC	1.67414e-124	1.44648e-86	1.75144e-21	5.15931e-101	8.96676e-06	4.71269e-06	1.25686e-20	2.52238e-10	8.29743e-37	1.91748e-111	4.11504e-11	3.90577e-124	1.68411e-34	2.25002e-59	1.06128e-29
F_21yrs_S1C	1.11242e-128	1.34669e-89	8.55025e-22	2.62496e-100	8.01673e-08	0.000112297	6.48147e-21	2.64556e-11	4.4154e-37	3.2516e-115	4.52244e-10	1.25493e-131	5.75359e-38	3.07553e-55	2.46889e-29
F_21yrs_ITC	5.26009e-124	2.19255e-83	3.73164e-22	2.3703e-100	1.50572e-07	2.9906e-05	6.50689e-21	2.66938e-11	6.18824e-36	1.30469e-113	1.25662e-09	4.45479e-126	5.91116e-37	6.70019e-57	7.0853e-29
F_21yrs_IPC	5.26109e-127	5.35314e-88	2.19895e-21	1.11421e-100	8.01872e-08	7.69305e-05	1.21546e-20	2.17582e-11	7.11639e-36	2.51389e-112	9.33054e-11	2.02879e-127	1.9863e-37	1.44268e-56	1.73353e-29
F_21yrs_HIP	5.43997e-120	6.06032e-76	6.29925e-21	3.88906e-99	3.47977e-07	6.52644e-06	6.3954e-21	1.09913e-11	5.94209e-36	5.02389e-112	9.35303e-09	2.54221e-119	4.12516e-36	3.10187e-65	1.97544e-28
F_21yrs_STR	2.524e-118	1.00297e-71	1.20351e-20	4.61354e-98	2.56959e-07	8.89442e-06	7.69591e-21	2.67829e-11	1.51801e-33	2.08651e-105	2.39579e-08	3.23664e-119	2.37993e-35	4.5507e-65	9.76388e-27
F_21yrs_OFC	5.3488e-124	1.15184e-84	1.58708e-22	3.61418e-98	1.03575e-07	0.000178499	3.69917e-20	1.39124e-11	2.14052e-36	4.50317e-111	5.91191e-10	7.82423e-127	1.10907e-37	1.04646e-57	1.37481e-29
M_23yrs_ITC	2.04405e-118	2.23327e-79	1.40796e-20	1.93891e-93	2.36198e-07	8.64481e-05	3.57227e-21	3.07206e-11	2.57552e-35	3.77669e-107	5.43207e-09	1.58434e-123	3.91885e-35	4.72864e-59	1.5008e-27
M_23yrs_AMY	7.67835e-115	3.29347e-71	5.27596e-20	2.22126e-93	2.24248e-07	0.000281575	6.57277e-22	1.17759e-10	2.48929e-34	2.69889e-107	3.88207e-08	1.00052e-117	5.38759e-32	1.59005e-67	9.10077e-27
M_23yrs_OFC	1.21006e-117	7.88653e-79	1.7248e-21	6.35323e-92	1.53939e-07	8.30384e-05	7.20414e-21	9.78045e-11	4.19571e-34	6.24419e-106	1.4214e-09	1.83486e-123	1.59308e-34	6.26906e-61	6.04831e-27
M_23yrs_MD	3.73295e-113	6.92991e-67	8.23736e-19	4.26815e-92	7.77215e-08	0.000144147	2.23728e-22	5.24197e-11	3.1262e-32	4.38355e-104	2.05038e-08	2.81745e-111	3.44318e-29	4.49987e-70	9.83208e-27
M_23yrs_STC	9.10663e-120	3.64819e-78	9.3561e-22	8.32519e-96	1.23815e-07	0.000152173	1.01988e-21	3.20636e-11	4.19564e-35	1.35146e-105	9.30479e-09	3.24739e-121	1.15518e-34	2.43789e-59	1.17467e-27
M_23yrs_VFC	3.85841e-120	8.68803e-79	9.71695e-22	2.63257e-96	2.11516e-07	0.000614381	8.87874e-22	4.90789e-11	6.01206e-37	4.18516e-109	3.21213e-09	6.83732e-123	4.27555e-36	4.89539e-60	1.84233e-27
M_23yrs_MFC	8.40833e-119	1.07248e-80	9.88526e-21	1.31673e-94	1.72325e-07	0.000786496	3.08943e-21	4.74345e-11	7.66455e-36	1.86847e-108	1.24695e-09	1.20798e-121	1.44213e-35	1.92592e-55	1.94266e-27
M_23yrs_M1C	3.53475e-119	7.11959e-79	3.55993e-21	1.70514e-94	2.4137e-07	0.000260104	3.05964e-22	3.3641e-11	3.38597e-35	8.50868e-107	1.40629e-09	2.83605e-122	2.73716e-35	1.18857e-58	6.57613e-28
M_23yrs_HIP	1.28875e-116	1.24481e-71	6.35346e-20	2.11223e-93	3.75329e-07	0.000129241	2.59339e-21	1.2495e-10	1.33651e-33	1.66811e-105	2.05966e-08	5.07489e-115	5.19275e-34	9.18808e-67	5.31819e-27
M_23yrs_CBC	6.76981e-117	3.31894e-72	2.56828e-20	8.95234e-95	4.84556e-06	6.39041e-05	3.6203e-21	3.31428e-10	1.73545e-37	3.78e-103	1.87804e-09	2.61376e-117	4.30017e-31	1.61795e-67	8.779e-27
M_23yrs_S1C	1.3292e-115	3.31313e-77	1.00089e-21	6.99055e-94	1.74216e-07	6.49607e-05	3.90533e-21	1.99803e-11	7.4067e-35	3.14555e-106	1.43022e-08	2.45442e-123	4.95155e-35	1.56802e-57	2.66495e-27
M_23yrs_A1C	1.49997e-119	1.98899e-78	8.65552e-21	1.91038e-93	1.84975e-07	5.91284e-05	1.09445e-21	3.75204e-11	6.10475e-35	4.54189e-110	1.84195e-09	2.0927e-119	5.175e-35	7.45508e-61	2.43987e-27
M_23yrs_IPC	1.29003e-119	1.37667e-79	1.52395e-21	8.66558e-97	2.57344e-07	1.14131e-05	4.77708e-21	2.55489e-11	1.58612e-35	1.19038e-109	9.1507e-10	5.13408e-123	2.41794e-35	3.94839e-57	8.52306e-28
M_23yrs_STR	6.06885e-111	1.50801e-71	2.02223e-18	1.35859e-92	1.80879e-07	4.86397e-05	5.22131e-21	3.03407e-11	1.16092e-32	1.62614e-100	1.76825e-08	8.58902e-114	2.65397e-30	1.97288e-63	1.19425e-25
F_30yrs_ITC	5.86046e-122	1.95433e-77	1.18349e-20	1.01653e-96	2.12087e-07	0.00037867	1.59297e-23	3.61062e-10	1.5568e-39	9.16292e-107	4.36099e-09	2.06021e-128	5.11578e-36	3.39406e-66	6.42313e-28
F_30yrs_STR	3.83855e-115	1.927e-65	1.43765e-20	5.44175e-95	7.87263e-07	0.000126228	1.7668e-23	1.58665e-10	1.39442e-35	3.28702e-104	1.24566e-07	7.09398e-122	4.85305e-33	4.23668e-69	8.68228e-26
F_30yrs_MFC	2.06444e-124	7.9758e-78	3.27434e-21	1.74811e-95	1.8669e-07	0.000572783	1.29791e-24	9.3837e-11	9.77558e-40	1.09393e-107	3.55658e-09	1.31909e-128	1.50237e-37	3.35727e-68	9.17347e-28
F_30yrs_OFC	1.35497e-123	1.83292e-78	1.31394e-21	1.25088e-98	1.10677e-07	0.0016345	2.00619e-24	8.69774e-11	2.68745e-40	1.80812e-107	4.90165e-09	3.5296e-129	4.26258e-37	4.90423e-68	8.66042e-28
F_30yrs_IPC	9.68988e-126	1.36707e-77	6.48e-22	4.03162e-97	1.94511e-07	0.00025066	2.76111e-23	4.60153e-11	3.09776e-38	5.13098e-108	1.00557e-08	3.88591e-129	8.48149e-37	1.92178e-66	3.70354e-28
F_30yrs_STC	4.93291e-124	2.30187e-79	4.74401e-21	3.51669e-95	1.52913e-07	0.000477773	4.9636e-24	6.96996e-11	1.22821e-39	3.30532e-110	1.45462e-09	3.4085e-130	2.55161e-37	5.73645e-64	5.19768e-28
F_30yrs_S1C	1.06685e-124	8.37433e-78	1.17022e-21	2.41463e-97	1.98093e-07	0.000745472	3.70664e-24	6.11083e-11	1.69282e-39	2.01743e-110	8.93979e-09	9.05595e-127	3.19746e-36	7.78526e-68	6.08285e-28
F_30yrs_MD	1.14874e-118	8.97919e-70	5.66805e-18	3.2636e-99	3.35427e-07	0.000248578	6.15784e-25	3.40622e-09	1.21957e-35	7.23553e-106	2.08324e-08	3.79203e-120	1.44935e-34	4.52071e-67	6.26489e-28
F_30yrs_HIP	1.80823e-121	2.69891e-73	2.97374e-20	5.66061e-100	6.60518e-07	0.000393632	8.62924e-24	8.91803e-11	1.68231e-37	5.61062e-108	1.98617e-08	3.72475e-126	7.33206e-37	6.39309e-68	9.33991e-28
F_30yrs_A1C	6.8391e-121	9.76617e-71	1.4446e-19	3.30312e-96	1.74515e-07	0.00140085	2.69242e-24	1.7282e-11	1.24959e-40	9.49969e-106	7.34648e-08	5.76775e-129	1.18274e-35	1.23195e-75	6.93707e-27
F_30yrs_V1C	3.27784e-125	3.20728e-79	2.57195e-21	2.53556e-97	3.05305e-07	0.000889306	1.45631e-24	4.92588e-11	2.98639e-39	9.79265e-109	1.2621e-09	9.83551e-128	4.54715e-36	2.12471e-65	1.36049e-27
F_30yrs_DFC	4.88442e-122	1.05855e-77	6.12926e-21	3.40066e-94	1.79391e-07	0.000760396	1.88261e-22	1.25309e-10	2.40376e-37	6.60336e-109	4.98933e-09	1.43839e-129	1.37628e-36	1.12693e-62	3.02678e-28
F_30yrs_AMY	3.02874e-118	7.96629e-73	1.56164e-20	3.29532e-97	5.10693e-07	0.000284421	3.58269e-23	7.4386e-11	9.81792e-36	5.44294e-107	7.94471e-09	2.23848e-124	1.18683e-34	3.25208e-64	1.58262e-27
F_30yrs_M1C	2.27327e-124	2.46714e-77	3.60041e-21	3.86458e-98	2.02487e-07	0.000939813	5.02756e-24	7.90456e-11	5.10308e-39	1.17697e-106	9.53942e-09	4.94511e-128	3.44195e-37	2.24868e-66	3.15811e-28
F_30yrs_VFC	3.87869e-121	3.05506e-71	1.68208e-20	2.73726e-94	2.70011e-07	0.00163361	1.18337e-23	4.85159e-11	2.4783e-38	3.60271e-103	4.40732e-08	3.82384e-126	1.21768e-35	2.13308e-70	1.53648e-27
F_30yrs_CBC	4.99432e-120	1.04885e-74	5.68375e-20	5.82109e-97	9.99892e-06	9.14313e-05	1.99556e-23	4.6335e-09	2.55941e-38	1.19753e-105	9.59116e-10	1.14473e-119	3.0504e-33	1.37505e-70	5.54393e-28
M_36yrs_M1C	1.77492e-121	1.18694e-76	3.37672e-20	5.15852e-94	1.32409e-06	0.00175961	4.12432e-23	7.66592e-10	2.30532e-37	2.4121e-103	4.21215e-09	4.01346e-126	3.11159e-35	6.0131e-61	1.74041e-27
M_36yrs_STC	1.12011e-121	4.53575e-79	6.47024e-21	5.27113e-96	2.46142e-07	0.000813716	3.22069e-23	4.1941e-10	1.25749e-37	5.86454e-110	1.73358e-09	9.46647e-124	4.10779e-35	1.3043e-59	9.67131e-29
M_36yrs_MFC	1.20897e-120	4.56273e-78	3.9068e-21	5.28255e-94	5.06066e-07	0.00112826	2.51434e-23	1.42625e-09	9.53458e-37	3.06176e-104	1.86004e-09	2.85041e-126	3.8885e-34	5.75354e-60	2.22471e-27
M_36yrs_ITC	6.74215e-121	3.21925e-79	1.97392e-20	2.20539e-96	4.09024e-07	0.000280092	1.53611e-22	6.96513e-11	1.02798e-35	2.72113e-108	5.66935e-09	9.06613e-125	8.75467e-38	1.95559e-63	3.50263e-28
M_36yrs_IPC	4.94461e-123	3.57324e-82	5.05618e-21	9.80199e-97	2.46262e-07	0.00247238	1.52276e-22	1.89999e-10	5.21076e-37	3.14676e-104	4.48616e-10	6.56056e-127	1.68354e-35	1.38542e-55	6.77407e-28
M_36yrs_AMY	4.84109e-121	3.56455e-74	2.93202e-21	1.01675e-98	3.44167e-07	0.000393884	2.94572e-23	1.71211e-10	3.94939e-36	2.45818e-108	2.04276e-08	4.22243e-124	4.08097e-35	2.00127e-67	6.75134e-28
M_36yrs_OFC	5.45933e-123	9.84953e-80	2.18308e-21	1.03057e-95	4.9238e-07	0.00037405	9.83601e-23	7.57596e-10	3.30539e-36	6.14558e-105	1.77332e-09	2.20211e-125	1.8747e-34	8.4044e-56	1.03682e-28
M_36yrs_VFC	1.13466e-122	3.31433e-81	3.991e-22	1.57095e-93	4.31556e-07	0.000789133	3.00852e-22	4.88032e-10	5.86775e-36	2.42938e-103	3.91848e-10	7.55763e-126	8.61452e-35	5.90607e-55	5.8395e-28
M_36yrs_DFC	8.90917e-125	3.65668e-84	8.96409e-22	1.17845e-98	2.04102e-07	0.00101153	1.65096e-21	3.07813e-10	1.38743e-37	2.08571e-109	2.90508e-10	5.72465e-127	2.12246e-37	3.35235e-57	7.52506e-29
M_36yrs_A1C	1.66265e-123	3.53013e-82	1.43713e-22	2.08352e-98	1.96097e-07	0.00252453	2.44455e-22	1.522e-09	9.07716e-36	3.27807e-108	2.58711e-10	1.47656e-124	7.21189e-36	2.16656e-56	3.08607e-28
M_36yrs_V1C	7.24522e-124	1.04263e-81	5.37029e-22	8.82985e-96	1.78434e-07	0.000304628	4.06428e-23	3.48219e-10	3.26282e-37	2.87917e-108	1.34273e-09	7.98288e-129	2.53179e-35	8.53649e-55	2.3022e-28
M_36yrs_CBC	4.20953e-120	7.6378e-79	8.45225e-20	3.26011e-95	2.3778e-05	0.000107521	1.26829e-22	1.98393e-09	3.93275e-36	1.89172e-105	2.01532e-10	2.0249e-121	1.08219e-32	4.89669e-66	3.05064e-28
M_36yrs_S1C	2.50505e-122	3.14821e-80	2.87264e-21	1.79528e-96	6.46257e-07	0.00292707	2.70327e-23	2.98585e-10	1.69856e-36	1.03928e-105	1.90421e-09	4.89373e-126	2.36559e-35	3.45912e-56	1.55589e-27
M_36yrs_HIP	4.60019e-119	1.6191e-72	5.60825e-21	2.03341e-96	1.63795e-06	0.000164113	1.11739e-22	2.85314e-10	3.54113e-35	3.49966e-111	1.64536e-08	2.41007e-120	1.13542e-35	5.9909e-64	5.09345e-28
M_36yrs_STR	7.45785e-116	6.4877e-71	4.57984e-20	2.30792e-93	3.46462e-07	4.09252e-05	1.03614e-21	2.69037e-10	2.37257e-33	5.44864e-105	3.70777e-08	6.95007e-119	1.26015e-32	4.46683e-65	1.07491e-26
M_36yrs_MD	1.56132e-119	4.55456e-69	9.62912e-20	3.73864e-99	5.40101e-07	2.67493e-05	2.08894e-24	1.98017e-09	3.94638e-36	3.2058e-109	8.76221e-09	2.75943e-117	2.14003e-33	2.13293e-68	2.83902e-28
M_37yrs_S1C	2.00701e-123	2.85679e-74	7.73529e-21	3.13305e-95	5.83613e-07	0.000635928	7.7424e-24	1.17486e-10	1.04744e-38	1.41503e-106	2.34385e-09	8.39864e-124	4.41445e-35	5.77585e-71	1.41018e-27
M_37yrs_V1C	2.26501e-121	9.50737e-75	3.60865e-20	1.119e-94	3.1601e-07	0.000580073	3.50816e-22	1.10176e-10	1.84551e-35	2.92148e-105	4.23518e-09	9.26346e-124	2.10973e-33	4.16859e-62	4.04417e-27
M_37yrs_CBC	1.27192e-109	1.50085e-61	1.01805e-18	6.33879e-89	1.46041e-05	0.000233827	1.78269e-21	1.71865e-10	2.11222e-35	8.46975e-100	2.38717e-08	2.2093e-110	1.06155e-30	4.50385e-71	8.10286e-25
M_37yrs_HIP	3.10388e-121	2.77521e-77	4.03034e-20	1.21115e-96	4.54472e-07	5.4975e-05	1.50728e-22	1.24194e-09	2.7879e-34	1.59765e-107	3.70398e-09	1.91724e-122	1.29268e-34	5.19578e-60	9.33067e-28
M_37yrs_IPC	7.79636e-119	3.65093e-76	5.68723e-21	5.75125e-97	3.40278e-07	9.09263e-05	5.46057e-22	1.06892e-10	2.16518e-36	2.88268e-108	7.38878e-09	4.13522e-122	3.71345e-36	8.67625e-67	8.25844e-28
M_37yrs_MD	2.07751e-121	1.03256e-73	6.45962e-20	5.17377e-102	2.15702e-07	0.000101945	3.79734e-24	2.58105e-09	1.24132e-35	4.41458e-110	3.72158e-09	2.04913e-119	1.75803e-34	2.09491e-70	4.11838e-28
M_37yrs_DFC	4.22437e-125	7.86965e-82	2.38911e-21	8.72358e-99	4.55369e-07	0.000207967	6.94359e-23	5.2079e-10	5.67711e-35	2.52951e-110	7.04349e-10	1.73638e-125	2.11236e-35	1.17846e-58	4.52266e-29
M_37yrs_VFC	1.31051e-123	1.25917e-79	8.97223e-22	1.5196e-96	1.78784e-07	0.000101495	4.63416e-23	8.05688e-10	1.12975e-36	9.94927e-107	2.06226e-09	2.34778e-125	2.30368e-34	2.40915e-63	2.11018e-28
M_37yrs_ITC	5.51322e-119	5.27822e-79	2.1077e-21	6.92274e-95	4.01775e-07	5.11148e-05	3.50004e-21	1.52722e-10	1.44403e-34	2.96573e-111	2.13444e-09	1.02264e-119	6.936e-35	1.28979e-53	2.5378e-28
M_37yrs_A1C	4.42996e-124	9.80609e-84	9.975e-22	3.01794e-99	2.58122e-07	0.000153664	4.45587e-22	1.05136e-10	2.79604e-38	1.25868e-110	2.56515e-09	7.36584e-127	4.93373e-37	6.11532e-67	7.08221e-29
M_37yrs_M1C	4.27145e-124	5.63002e-81	9.08133e-22	1.73223e-95	2.32007e-07	0.000133656	1.17209e-22	2.18936e-10	3.33445e-36	1.81783e-105	2.96952e-09	1.9729e-125	1.83941e-35	8.59289e-63	2.67242e-28
M_37yrs_OFC	8.28509e-124	4.58365e-80	1.39636e-21	1.56525e-96	2.20321e-07	0.000187841	1.52253e-22	3.78497e-10	6.35029e-37	1.67897e-107	2.84417e-09	1.34255e-126	3.13271e-36	1.40222e-66	5.01146e-28
M_37yrs_STR	2.48481e-115	2.19878e-67	3.52725e-18	1.71273e-93	1.26564e-06	0.000145977	6.50012e-23	3.88616e-10	7.46059e-34	4.47121e-103	1.14978e-08	3.40867e-114	4.51353e-31	3.16918e-66	3.95892e-26
M_37yrs_STC	1.49702e-126	2.44375e-81	1.97278e-21	5.37076e-102	1.08518e-07	0.000230305	3.13169e-24	9.96001e-11	2.81117e-40	3.31793e-111	5.42201e-09	4.10024e-128	6.9456e-38	3.7885e-73	5.06168e-28
M_37yrs_AMY	1.25814e-118	1.39512e-72	1.12288e-20	6.18421e-97	5.8362e-07	0.000128086	2.10057e-22	7.74004e-11	7.57077e-35	4.04585e-108	8.27202e-09	1.70138e-120	1.40743e-33	4.23974e-72	2.9169e-28
M_37yrs_MFC	2.7251e-123	3.30959e-80	9.06404e-22	8.10823e-94	5.86066e-07	3.92884e-05	1.27924e-20	5.13377e-11	6.47253e-33	3.12991e-110	1.3979e-09	1.12797e-120	8.65701e-34	1.25492e-49	2.22308e-30
F_40yrs_DFC	2.88263e-114	3.08802e-64	6.67406e-20	5.13022e-90	6.57501e-07	0.000325755	3.20232e-21	1.18454e-11	1.49439e-35	5.89941e-102	9.09002e-08	6.70567e-120	5.67642e-34	3.41323e-64	3.45751e-26
F_40yrs_ITC	1.617e-116	6.05346e-74	9.6823e-21	6.05936e-90	4.45549e-07	0.000368777	7.11701e-21	5.18622e-11	5.71698e-35	6.14505e-104	1.44285e-08	5.06852e-121	1.69267e-33	3.3721e-56	2.14106e-27
F_40yrs_VFC	1.65123e-121	1.35347e-81	4.08637e-21	1.95812e-94	2.44323e-07	3.90221e-05	9.07026e-21	6.67224e-11	6.73995e-36	5.16421e-107	3.85496e-10	3.84297e-125	1.79165e-36	2.88622e-52	3.14657e-28
F_40yrs_MD	9.1229e-113	2.10864e-65	3.18934e-18	2.1771e-91	2.8844e-07	0.000296943	8.80407e-21	3.09228e-11	1.9851e-32	8.51136e-104	2.09335e-08	5.77475e-111	1.15188e-30	1.65521e-65	9.46462e-28
F_40yrs_AMY	3.60626e-111	5.47043e-61	4.30765e-19	1.60766e-88	4.90922e-07	0.000133643	1.0731e-20	4.00172e-12	1.83489e-33	1.6162e-104	1.32149e-07	4.6365e-113	1.25359e-31	1.05264e-60	2.5108e-24
F_40yrs_A1C	3.43467e-114	1.60641e-63	2.12594e-19	6.78522e-92	1.01615e-06	0.000866109	1.9626e-21	1.28256e-11	1.76567e-36	2.12196e-102	5.94176e-08	2.2083e-117	1.47196e-33	1.46452e-64	4.41677e-25
F_40yrs_CBC	2.95549e-113	6.90257e-61	3.56451e-19	4.96763e-89	3.13531e-05	0.000339422	1.13779e-21	2.44154e-09	1.3415e-34	8.38633e-100	3.96311e-08	1.81097e-109	1.00642e-29	9.25733e-67	3.1709e-25
F_40yrs_V1C	1.14336e-120	5.0645e-76	6.40338e-21	1.73592e-93	6.68642e-07	0.000131294	2.27317e-22	1.53118e-11	2.15849e-38	4.95216e-104	2.50681e-09	1.26248e-124	1.16133e-33	4.64765e-57	5.86657e-27
F_40yrs_OFC	2.77373e-121	1.89361e-82	4.97456e-21	8.337e-95	1.90213e-07	0.000604713	1.76709e-20	6.17514e-11	1.17759e-35	5.17736e-107	1.10403e-09	7.31719e-126	1.03614e-35	1.68293e-51	1.51421e-28
F_40yrs_STC	7.26148e-121	2.61727e-79	1.08814e-20	1.13371e-93	2.09586e-07	0.000589798	3.76221e-21	2.38414e-11	1.06009e-35	8.85098e-107	6.99316e-10	3.77717e-124	3.11594e-35	1.26093e-54	1.31818e-27
F_40yrs_IPC	2.20175e-122	1.44973e-82	1.14899e-20	2.48923e-95	2.51011e-07	0.000394958	1.41906e-20	5.64882e-11	1.35008e-35	9.81756e-108	2.89713e-09	5.21788e-124	2.59446e-35	1.28101e-52	8.74128e-28
F_40yrs_M1C	4.14144e-112	8.77436e-61	4.83082e-18	9.18698e-89	1.87193e-06	0.00203611	1.26362e-21	1.3185e-11	5.08404e-35	4.61114e-99	2.02054e-07	3.8017e-117	3.78153e-33	6.16106e-60	8.82955e-25
F_40yrs_HIP	4.41525e-112	1.76383e-61	4.25904e-20	1.14291e-85	1.60474e-06	0.000188445	2.65767e-19	4.09991e-12	4.2714e-32	1.21539e-102	2.03888e-07	9.61373e-116	4.0425e-33	4.37538e-60	3.81652e-26
F_40yrs_STR	4.17543e-114	4.40995e-66	3.2384e-19	7.05578e-91	3.99073e-07	0.00021326	1.82935e-20	4.25437e-11	2.66503e-32	9.45777e-103	9.71332e-08	8.33131e-117	6.38621e-31	2.86264e-63	5.45718e-25
F_40yrs_S1C	5.04291e-113	2.06978e-63	1.82236e-19	4.99988e-89	1.0295e-06	0.00048455	4.79847e-21	1.95664e-11	1.00459e-34	2.02222e-99	3.63436e-08	1.00467e-116	1.9743e-33	1.13324e-56	6.30305e-26
