# Supplementary material for: Spatiotemporal Brain Transcriptomics Reveal Risk Gene Hot-Spots in Major Neuropsychiatric Disorders
Source: Research Square preprint supplement (doi:10.21203/rs.3.rs-7667905/v1), 2025-10-08
Supplement: Supplementary file 8 [file Supplemental Table 4. Data supporting Fig. 4b, Top 3 Hot-spots for each of the 15 traits.xlsx]

## Sheet: Supplemental Table 5. Data supp
sex	stage	region	dev_stage	structure	disorder	r
M	cw_16	VFC	Early_mid_prenatal	frontal_cortex	IQ	0.612676
M	cw_16	ITC	Early_mid_prenatal	temporal_cortex	IQ	0.608117
M	cw_21	ITC	Late_mid_prenatal	temporal_cortex	IQ	0.609409
M	cw_16	A1C	Early_mid_prenatal	temporal_cortex	ASD	0.76614
M	cw_16	OFC	Early_mid_prenatal	frontal_cortex	ASD	0.765536
M	cw_16	M1C	Early_mid_prenatal	frontal_cortex	ASD	0.766059
F	cw_12	MFC	Early_prenatal	frontal_cortex	TS	0.478177
M	cw_21	HIP	Late_mid_prenatal	limbic_system	TS	0.475852
M	cw_21	VFC	Late_mid_prenatal	frontal_cortex	TS	0.47803
M	cw_09	MGE	Early_prenatal	ganglionic_eminence	Neuroticism	0.533183
M	cw_13	CB	Early_mid_prenatal	cerebellum	Neuroticism	0.534939
M	cw_13	AMY	Early_mid_prenatal	limbic_system	Neuroticism	0.531853
M	cw_16	MD	Early_mid_prenatal	thalamus	ADHD	0.730616
M	cw_16	MD	Early_mid_prenatal	thalamus	ADHD	0.711834
M	cw_24	MD	Late_mid_prenatal	thalamus	ADHD	0.715713
M	cw_24	MD	Late_mid_prenatal	thalamus	OCD	0.358499
M	cw_24	CBC	Late_mid_prenatal	cerebellum	OCD	0.376231
F	yrs_21	CBC	Young_adulthood	cerebellum	OCD	0.344697
M	cw_16	VFC	Early_mid_prenatal	frontal_cortex	ANO	0.674224
F	cw_17	VFC	Early_mid_prenatal	frontal_cortex	ANO	0.676457
F	yrs_19	AMY	Adolescence	limbic_system	ANO	0.680157
M	cw_08	AMY	Early_prenatal	limbic_system	PanicDisorder	0.643175
M	cw_09	AMY	Early_prenatal	limbic_system	PanicDisorder	0.646658
F	cw_19	STR	Late_mid_prenatal	striatum	PanicDisorder	0.643703
M	cw_08	PCx	Early_prenatal	parietal_cortex	BIP	0.500708
F	cw_13	STR	Early_mid_prenatal	striatum	BIP	0.505786
M	cw_16	DFC	Early_mid_prenatal	frontal_cortex	BIP	0.498095
F	cw_17	CBC	Early_mid_prenatal	cerebellum	MDD	0.472225
M	cw_21	CBC	Late_mid_prenatal	cerebellum	MDD	0.471805
F	yrs_01	HIP	Late_infancy	limbic_system	MDD	0.472119
M	cw_16	ITC	Early_mid_prenatal	temporal_cortex	SZes	0.643278
M	cw_16	HIP	Early_mid_prenatal	limbic_system	SZes	0.640761
F	yrs_21	CBC	Young_adulthood	cerebellum	SZes	0.64183
F	yrs_01	STC	Late_infancy	temporal_cortex	SZgw	0.479292
F	yrs_01	MFC	Late_infancy	frontal_cortex	SZgw	0.478188
F	yrs_01	S1C	Late_infancy	parietal_cortex	SZgw	0.478384
F	yrs_01	M1C	Late_infancy	frontal_cortex	Epilepsy	0.493169
M	yrs_08	A1C	Late_childhood	temporal_cortex	Epilepsy	0.485512
M	yrs_08	STC	Late_childhood	temporal_cortex	Epilepsy	0.496905
M	cw_37	MD	Late_prenatal	thalamus	AD	0.360784
M	cw_37	M1C	Late_prenatal	frontal_cortex	AD	0.359614
F	yrs_02	VFC	Early_childhood	frontal_cortex	AD	0.358591
F	yrs_01	V1C	Late_infancy	occipital_cortex	PD	0.62392
M	yrs_36	OFC	Young_adulthood	frontal_cortex	PD	0.622981
M	yrs_37	MFC	Young_adulthood	frontal_cortex	PD	0.63012
