# Supplementary material for: Spatiotemporal Brain Transcriptomics Reveal Risk Gene Hot-Spots in Major Neuropsychiatric Disorders
Source: Research Square preprint supplement (doi:10.21203/rs.3.rs-7667905/v1), 2025-10-08
Supplement: Supplementary file 9 [file Supplemental Table 5. Data supporting Fig. S2, Jaccard similarities between the 15 merged risk gene sets.xlsx]

## Sheet: risk gene set for the 15 traits
	IQ	ASD	TS	Neuroticism	ADHD	OCD	ANO	PanicDisorder	BIP	MDD	SZes	SZgw	Epilepsy	AD	PD
1	ADCY2	ADNP	AAMDC	AATK	ARTN	AP4B1	ADK	ANXA5	ADD3	ABT1	AKAP11	ABCB9	ADCY7	ABCA7	ASXL3
2	AKAP6	ANK2	ABCB9	ACACB	ATP6V0B	AP4B1-AS1	AMIGO3	ATP2B2	ALPK3	ACTL8	ANKRD12	ACD	ATAD2B	ABCB4	BAG3
3	ALMS1	ANKRD11	ABCG8	ACBD4	B4GALT2	ARL4A	AMT	C7orf50	ANKS1B	ACVR1B	ASH1L	ACTG1P17	ATXN1	ABCD4	BIN3
4	APC4	AP2S1	ACO2	ACO2	CCDC24	BCL2L15	AP1B1	COX5A	ASB16	ADCK3	CAC1G	ACTR5	BCKDK	ABCG1	BRIP1
5	ATXN1L	ARID1B	ADAMTS7P1	ACP2	DPH2	BTF3P11	APEH	CYP2W1	ATP13A1	ANKHD1	CUL1	ADAMTS7P1	BCL11A	ABHD16A	BST1
6	BRWD1	ASH1L	AHCTF1P1	ACSS2	DUSP6	C3orf58	ARIH2	DLX1	ATXN7L3	ANKHD1-EIF4EBP3	DAGLA	ADAMTSL3	BCL7C	ABI3	C5orf24
7	BSN	ASXL3	ALG8	ACTN1	FOXP2	CDH20	ARIH2OS	DLX2	BAG4	ANKK1	DNM3	ADM5	BRD7	ABLIM1	CAB39L
8	BTN1A1	BCL11A	AP3B2	ACVR2A	IPO13	CLN5	B3GALT2	EIF3B	BCL11B	ANKS1B	EIF2S3	AIG1	C16orf93	AC005071.1	CAMK2D
9	BTN2A1	CAC1E	AQP11	ACYP1	KDM4A	D2HGDH	BSN	EIF5	BORCS7	AP3B1	FAM120A	AKAP6	C16orf98	AC005757.6	CASC16
10	BTN3A1	CAC2D3	ARL6IP4	ADGRB1	KDM4A-AS1	DCLRE1B	C17orf59	ELOVL2	BRE	APOPT1	FAM178A	AKT3	C2orf44	AC005757.7	CD19
11	BTN3A2	CC1	BAZ2B	AFTPH	LINC00461	DKFZp434L192	C3orf62	ELP4	C11orf80	AREL1	GRIA3	ALDOA	C3orf33	AC005779.1	CHD9
12	C3orf62	CELF4	BMS1	AGBL1	LINC01288	DLGAP1	C3orf84	FAR1	C15orf53	ARHGEF25	GRIN2A	ALMS1	CBX1	AC005779.2	CHRNB1
13	CCDC36	CHD2	C12orf65	AGBL2	LINC01572	ERCC4	CADM1	GPER1	C17orf53	ASCC3	HCN4	ALMS1-IT1	CCDC112	AC006126.3	CLCN3
14	CD19	CHD8	C15orf59	AGBL4	LINC02060	FBXL3	CAMKV	GPR146	C1orf185	ASIC2	HERC1	ALMS1P	CDK5RAP3	AC006126.4	CNTN1
15	CDHR4	CORO1A	C1QL4	AGO2	LINC02497	FBXL7	CCDC36	GSX2	CAC1C	ASTN2	HIST1H1E	ALPK3	CNEP1R1	AC006953.1	CRHR1
16	CELSR3	CREBBP	CCDC62	AIF1	MIR3666	FOCAD	CCDC71	HMGN3	CCS	ASXL3	KDM6B	AMBRA1	COBLL1	AC007969.5	CRLS1
17	CEP57	CTNNB1	CCNYL2	ALAS1	MIR9-2	FOCAD	CDC73	IMMP1L	CD47	ATP1A3	MAGEC1	ANKRD44	COPZ2	AC008984.2	CTSB
18	CHST10	DEAF1	CD276	ALG12	PCDH7	GAL3ST2	CDHR4	ITGA2B	CDAN1	B3GALTL	MAGI2	ANKRD44-IT1	CSRNP3	AC008984.5	DDRGK1
19	CPNE1	DIP2A	CD302	ALK	POC1B	GRID2	CELSR3	KCNN2	CDKN2C	BAD	NR3C2	ANKRD63	CTF1	AC008984.6	DLG2
20	CREB3L4	DNMT3A	CDK2AP1	ANKK1	PTPRF	GRID2	CHAC2	KIRREL3	CILP2	BAG5	OR4P4	ANP32E	FAM184A	AC008984.7	DNAH17
21	CRTC2	DPYSL2	CDKN1A	ANKRD10	SEMA6D	GRID2	COL7A1	KLHL22	CNNM4	BAZ2B	PREP	AP3B2	FAM228A	AC011530.4	DYRK1A
22	CYCSP7	DSCAM	CHADL	ANKRD45	SLC6A9	HIPK1	CTNNB1	KLHL7	COG8	BCHE	RB1CC1	ARHGAP1	FAM228B	AC011558.5	ELOVL7
23	DBN1	DYNC1H1	CLNS1A	APEH	SORCS3	IFNB1	DAG1	MRGPRG	CSF3	BEND4	SETD1A	ARL14EP	FANCL	AC012146.7	FAM171A2
24	DCC	DYRK1A	CPEB1	AQR	SPAG16	ING5	DALRD3	PITRM1	CTSF	BSN	SLC22A11	ARL6IP4	FBRS	AC023347.2	FAM47E
25	DDN	EIF3G	CSMD3	AREL1	ST3GAL3	IRG1	ERLEC1	PITX2	CUL4A	BTN1A1	SP4	AS3MT	FBXL19	AC025918.2	FAM47E-STBD1
26	DDX27	ELAVL3	CTB-178M22.2	ARFGAP2	TMEM161B-AS1	KCTD12	EXOC4	PRPF18	CYP17A1	BTN2A1	SRRM2	ASCL1	FKBP1B	AC067968.3	FAM49B
27	DMXL2	FOXP1	DJB7	ARHGAP1		KIAA0355	FAM19A2	RGS6	DDHD2	BTN3A2	STAG1	ASH2L	FUS	AC068282.3	FBRSL1
28	EPHA3	FOXP2	DJC22	ARHGAP15		KIT	FAM212A	RPL27A	DDN	BTN3A3	SV2A	ASPG	GABRA2	AC073842.19	FCGR2A
29	ERLIN1	GABRB2	DPP4	ARHGAP27		LINC00207	FBXW12	RPP25	DF5	C11orf31	TRIO	ASPHD1	GABRG1	AC074212.3	FGD4
30	FAM154B	GABRB3	EFTUD1	ARHGEF15		LINC00229	FOXP1	SERPINI1	DHH	C16orf45	XPO7	ATG13	GALNT3	AC074212.5	FGF20
31	FOXO6	GFAP	EP300	ARL17A		LOC100130849	GMPPB	SMAD1	DJB7	C1QTNF7	ZMYM2	ATP2A2	GJA1	AC074212.6	FYN
32	GBF1	GI1	EP300-AS1	ARL17B		LOC100240728	GPR75-ASB3	SNURF	DMRTA2	C3orf84	ZNF136	ATPAF2	GLS	AC084219.3	GAK
33	GCAT	GIGYF1	EPB41	ARL3		LOC101927311	GPX1	SNURF	DOCK2	C7orf72		ATXN7	GMPS	AC084219.4	GALC
34	GNL3	GRIA2	ERC2	ARNTL		LOC101927348	GT1	STON2	FADS1	CABP1		B2	GNPDA2	AC090559.1	GBAP1
35	GPD2	GRIN2B	ESYT2	ARPP21		LOC101928401	IMPDH2	TAC1	FADS2	CAC1E		B3GAT1	GRIK1	AC090559.2	GBF1
36	GPT	HDLBP	FAM154B	AS3MT		LOC101928846	IP6K1	TMEM50A	FAF1	CAC2D1		BAG4	GTDC1	AC092066.6	GCH1
37	HCRTR1	HECTD4	FAM186B	ASCC3		LOC285484	IP6K2	TMEM86B	FAM196B	CAMKK2		BANK1	HEATR3	AC092849.1	GPNMB
38	HHLA2	IRF2BPL	FLT3	ASIP		LOC643441	KLHDC8B	TTC1	FEN1	CCDC36		BC037927	HIBCH	AC093673.5	GS1-124K5.11
39	IER5L	KCNMA1	FMNL3	ASNS		LOC650226	LAMB2	TUBB6	FLRT1	CCS		BCL11B	HOXB1	AC099850.1	GXYLT1
40	IL27	KCNQ3	FPR1	ASXL3		LSM14A	MGMT	VAV3	GAL3ST3	CDH13		BCL2L12	HOXB13	AC103563.8	HIP1R
41	IP6K2	KDM5B	FPR2	ATAD2B		MAGI3	MON1A	ZBTB8A	GATAD2A	CDH22		BNIP3L	HOXB2	AC138472.4	HLA-DRB5
42	ITIH1	KDM6B	FPR3	ATF6B		2025-03-11	MST1		GLT8D1	CDH9		BOLL	HOXB3	AC138472.6	IGSF9B
43	ITIH3	KIAA0232	FSD2	ATRN		MIR4283-1	NCAM1		GMIP	CDK14		BRINP2	HOXB4	ACE	INPP5F
44	KMT2D	KMT2C	GAB2	B3GALTL		MIR4283-2	NCKIPSD		GNL3	CELF2		BTBD18	HOXB5	ACE3P	IP6K2
45	L3MBTL2	KMT2E	GABRG1	BAG6		MIR491	NDUFAF3		GOLGA6L4	CELF4		BTG1	HOXB6	ACP2	ITGA8
46	LAMB2	LDB1	GDPD4	BAIAP2		MKL2	NEFH		GRIN2A	CHD6		C10orf32	HOXB7	ACTG1P10	ITPKB
47	LINC02089	LRRC4C	GOLGA6L10	BAIAP2L1		NEU4	NICN1		GSDMA	CHMP3		C10orf32-ASMT	HOXB8	ADAM10	KANSL1
48	LMOD1	MAP1A	GOLGA6L17P	BARD1		OLFML3	P4HTM		GSDMB	CKB		C11orf31	HOXB9	ADAM23	KCNIP3
49	LONRF2	MBD5	GOLGA6L9	BBX		PHTF1	PER1		HAPLN4	CNTN5		C12orf65	HSD3B7	ADARB1	KCNS3
50	MAST3	MED13L	HCCAT3	BCKDK		PIWIL1	PFKFB4		HDAC5	CNTP5		C14orf2	INPP1	ADCY10P1	KPNA1
51	METTL13	MKX	HIP1R	BEND4		PTPLAD2	PLXNB1		HIST1H2AK	CRB1		C16orf86	ITGAM	ADK	KRTCAP2
52	MST1	MYT1L	HOMER2	BEND7		PTPLAD2	PRKAR2A		HIST1H2AL	CSMD1		C16orf92	ITGAX	ADRA1A	LCORL
53	MST1R	NCOA1	INTS4	BHLHA15		PTPN22	PTBP2		HIST1H2BN	CTN3		C2orf47	ITSN2	AGBL2	LINC00693
54	MTCH2	NR3C2	ITGB6	BLK		RSBN1	QARS		HIST1H4K	CTNND1		C2orf69	KAT8	AGER	LOC100131289
55	MTMR2	NRXN1	KCNH3	BORCS7		RSPO4	QRICH1		HLF	CTTNBP2		C2orf82	KCB1	AGFG2	LRRK2
56	MTMR4	NSD1	KCTD14	BORCS7		S100A12	RBM5		ILF3	DCC		C3orf49	KCNN2	AGPAT1	MAP3K14
57	MZF1	NUP155	KCTD20	BRI3		S100A7A	RBM6		ITIH1	DCDC1		C4orf27	KLHL29	AGRN	MAP4K4
58	NCAPG	PAX5	KCTD21	BRINP3		S100A7L2	RFPL1		ITIH3	DCDC5		CA14	KPNB1	AIF1	MAPT-AS1
59	NDUFS3	PHF12	KCTD21-AS1	BTBD10		S100A8	RHOA		ITIH4	DENND1A		CA8	KRTAP11-1	AIM2	MBNL2
60	NEK4	PHF2	L3MBTL2	BTN3A2		S100A9	RNF123		KCNG1	DENND1B		CAC1C	KRTAP13-3	AL109806.1	MCCC1
61	NFATC3	PHF21A	LINC00681	C11orf31		SLC9A9	SEMA3F		KCNS1	DLST		CAC1C-AS4	KRTAP13-4	AL121914.1	MED12L
62	NT5DC2	POGZ	LINC00839	C11orf49		SLC9A9-AS1	SLC25A20		KLC2	DRD2		CAC1C-IT3	KRTAP15-1	AL355353.1	MEX3C
63	NUP210L	PPP1R9B	LINC01122	C1QTNF4		SYT6	SLC26A6		KMT2D	ELAVL2		CAC1D	KRTAP19-1	AL645922.1	MIPOL1
64	OR12D3	PPP2R5D	LMO3	C1QTNF7		TXNL1	SPATS2		KMT2E	EMILIN3		CAC1I	KRTAP19-2	AL691452.1	NOD2
65	OSBP2	PPP5C	LOC100335030	C2		WDR7	TCTA		LETM2	EP300		CACNB2	KRTAP19-3	ALS2CL	NSF
66	PAM	PRR12	LOC100505984	C22orf46		ZNF479	TMEM107		LMAN2L	EPHB2		CALB2	KRTAP19-4	ANK3	NUCKS1
67	PAX4	PTEN	LOC100507091	C3orf18			TMEM89		LPAR2	ERBB4		CCDC175	KRTAP19-5	AOAH	PAM
68	PCDHA1	PTK7	LOC100996579	C9orf129			TRAIP		LRFN4	ESR2		CDK2AP1	KRTAP19-6	AP000230.1	PMVK
69	PCDHA2	RAI1	LOC101927267	CAC1E			UBA7		LRRC3C	ESRRG		CENPM	KRTAP19-7	AP000442.1	RAB29
70	PCDHA3	RFX3	LOC101928571	CAC2D2			UCN2		LSM1	ETFDH		CENPT	KRTAP19-8	AP000974.1	RETREG3
71	PCDHA4	RORB	LOC101929221	CACYBP			UQCRC1		MACROD1	EXT1		CHADL	KRTAP20-1	AP001257.1	RIMS1
72	PCDHA5	SATB1	LOC101929512	CADM2			USP19		MACROD2	EYS		CHR2	KRTAP20-2	AP001439.2	RIT2
73	PCDHA7	SCN1A	LOC101929690	CALN1			USP4		MAPK1	FADS1		CHR3	KRTAP20-3	AP001596.6	RNF141
74	PLCL1	SCN2A	LOC102724034	CAMTA1			VAMP2		MARK2	FADS2		CHR5	KRTAP20-4	AP001597.1	RPS12
75	PPIP5K2	SETD5	LOC283692	CBFA2T3			WDR6		MAU2	FAM120A		CHRM3	KRTAP21-1	AP3M2	RPS6KL1
76	PPP2R2D	SHANK2	LOC283693	CC2D2A			ZNF804A		MBTD1	FAM120AOS		CHRM4	KRTAP21-2	AP4M1	SATB1
77	PRMT7	SHANK3	LOC338963	CCDC134					MCHR1	FAM172A		CHRNB4	KRTAP21-3	APBA2	SCAF11
78	QRICH1	SIN3A	LOC340357	CCDC189					MED24	FANCL		CILP2	KRTAP22-1	APH1B	SCARB2
79	RBL2	SKI	LOC402160	CCDC36					MRPL33	FCF1		CKAP5	KRTAP22-2	APOBEC2	SEMA4A
80	RBM39	SLC6A1	LOC441666	CCDC54					MRPS33	FH		CLCN3	KRTAP6-1	APOC1	SETD1A
81	RECQL4	SMARCC2	LOC643072	CD40					MUSTN1	FHIT		CLP1	KRTAP6-2	APOC1P1	SH3GL2
82	RNF123	SPAST	LOC727751	CD8A					MYRF	FNIP2		CLU	KRTAP6-3	APOC2	SIPA1L2
83	RNF43	SRPR	LOC729732	CDH2					NCAN	GINM1		CMTR2	KRTAP8-1	APOC4	SLC44A4
84	SEMA3F	STXBP1	LOC80154	CDK10					NCOA6	GPC5		CNNM2	LRRC46	APOC4-APOC2	SNCA
85	SH2B1	SUV420H1	LONRF1	CELF1					NDUFA13	GPC6		CNOT1	MFSD2B	APOE	SPPL2B
86	SHISA4	SYNGAP1	LRPPRC	CELF2					NEK4	GRIK5		CNTN4	MFSD6	APP	SPTSSB
87	SLC26A6	TAOK1	LY75	CELF4					NIP7	GRM5		COQ10B	MRPL10	AQP9	STK39
88	SLC39A8	TBL1XR1	LY75-CD302	CENPM					NMB	GRM8		CPEB1	B1	ARHGAP1	SYT17
89	SLC7A6OS	TBR1	2025-03-07	CENPW					NSD3	GTF2IRD1		CPEB1-AS1	NFE2L1	ARID5B	TMEM163
90	SPNS1	TCF20	MCRS1	CFB					NT5DC2	HARS		CPNE8	NPEPPS	ARL4A	TMEM175
91	ST3GAL3	TCF4	MECR	CFHR3					ORMDL3	HARS2		CPT1C	ORAI3	ARPC1B	TRIM40
92	STAB1	TCF7L2	MEX3B	CHADL					PACS1	HIST1H1B		CREB3L1	OSBPL7	ASB16-AS1	UBAP2
93	SULT1A2	TEK	MIR1281	CHMP3					PARP10	HIST1H2AL		CSMD1	PAPD5	ATF6B	UBTF
94	SYNGR1	TLK2	MIR2053	CKAP5					PBRM1	HIST1H2BF		CTNND1	PCDH7	ATP5G1	VAMP4
95	T8	TM9SF4	MIR2113	CLDN23					PBX4	HIST1H2BL		CTRL	PFN4	ATP5J2	VPS13C
96	TET2	TRAF7	MIR3925	CLP1					PCID2	HIST1H2BN		CUL3	PGGT1B	ATP6V0CP1	WNT3
97	TEX14	TRIM23	MIR3926-1	CLUH					PDF	HIST1H2BO		CYP17A1	PHKG2	ATP6V1G2	ZNF608
98	TMCO6	TRIP12	MIR3926-2	CMTR2					PLEC	HIST1H3I		CYP2D6	PLCH1	AURKA
99	TMEM89	UBR1	MIR4304	CNNM2					PLEKHO1	HIST1H3J		CYP2D7P	PNPO	AXIN2	CUEDC2
100	TNIP2	VEZF1	MIR4766	CNPPD1					PLPP5	HIST1H4L		DDHD2	PRAC1	AZGP1	CYLD
101	TRIOBP	WAC	MIR4785	CNTN5					PRKAG1	HLA-B		DDX28	PRR14	B9D2	DCAF16
102	TTC29	ZMYND8	MIR5100	CNTP2					PSMD3	HLA-DQA1		DF5	PRR15L	BACH2	GRN
103	TTLL7		MIR5707	COMMD10					QTRT1	HLA-DQB1		DGKI	PRSS36	BAG6	LINC00174
104	USP19	ADTRP	MIR595	CRB1					RBKS	HMGN4		DGKZ	PRSS53	BANK1	MED13
105	USP4	BLK	MIR6889	CREB3L1					RBX1	HS6ST3		DJC19	PRSS8	BCAM	NEK1
106	WBP2NL	C8orf74	MIR8072	CRHR1					RCE1	HSPA1A		DMTF1	PTPRK	BCL11A	NFATC2IP
107	WDR55	CRHR1	MPHOSPH9	CRYZ					RCOR2	HSPE1-MOB4		DNM1P41	PYCARD	BCL11B	NMD3
108	ZMIZ2	HDAC4	MUC16	CSDC2					RHEBL1	HTT		DOC2A	PYDC1	BCL3	PRSS3
109	ZNF446	KANSL1	MYO7A	CSF3					RPS6KA2	IGSF6		DOPEY1	RNF40	BEND5	SEC23IP
110	ZNF584	KCNN2	NCAPG2	CSNK1G1					SEC11A	IK		DPEP2	SCN1A	BIN1	TXNDC15
111	ZNF638	KIZ	NDUFC2	CSNK2B					SF3B2	INPP4B		DPEP2NB	SCN2A	BLK
112	ZNFX1	MACROD2	NDUFC2-KCTD14	CTC1					SFMBT1	IQCJ-SCHIP1		DPEP3	SCN3A	BLOC1S3
113	ZSCAN12	MANBA	NPTN	CTDP1					SLC25A17	ITGB6		DPYD	SCN7A	BRD2
114		MAPT	NPTN-IT1	CTF1					SLC44A2	ITPR3		DPYD-AS1	SCN9A	BTLA
115	ACSL5	MDH1	OGFOD2	CTNND1					SMIM4	KDM3A		DRD2	SCRN2	BTNL2
116	ADGRB1	MFHAS1	OPRD1	CTSB					SPCS1	KIAA1143		DUS2	SETD1A	BZRAP1
117	AFF3	MMP12	OTUD1	CTTNBP2					SPTBN2	KIF15		EDC4	SF3B14	BZRAP1-AS1
118	AGAP1	MSRA	PAK1	CTU2					SSBP2	KLC1		EFHD1	SKAP1	C10orf40
119	AGBL5	NTM	PANDAR	CYB561D2					ST13	KMT2A		EFTUD1P1	SLC33A1	C11orf49
120	AKTIP	PINX1	PHF5A	CYP17A1					ST8SIA6	KYNU		EHBP1L1	SNX11	C11orf73
121	ALOX5	PKP4	PITPNM2	CYP21A2					STAR	LIN28B		EMB	SP2	C17orf107
122	AMBRA1	PLEKHM1	PLA2R1	CYP2D6					STARD9	LPIN3		EMX1	SP6	C19orf83
123	AMT	SOX7	PRPF40B	CYP7B1					STK4	LRFN5		ENKD1	SRCAP	C1QB
124	ANK2	WDPCP	PRPH	CYS1					SUGP1	LRP1B		EP300	STAT1	C1QTNF4
125	ANKHD1	WNT3	PSMD14	DARS2					TENM4	LST1		EP300-AS1	STAT4	C1orf159
126	ANKHD1-EIF4EBP3	WNT5B	PTPRN2	DAZL					TERF2	LTBP3		EPHX2	STMND1	C2
127	ANKS1B	XKR6	PTPRU	DCAF5					TFAP2B	MANEA		EPN2	STX1B	C2orf82
128	AP1G1	XRN2	PXT1	DCC					THRA	MAP9		EPN2-AS1	STX4	C4A
129	AP3B2	A15	RAB44	DDB2					TM6SF2	2025-03-10		EPN2-IT1	TBC1D32	C4A-AS1
130	APEH	ACTB	RANGAP1	DDR1					TMED6	MARK3		ERCC4	TBKBP1	C4B
131	APOBR	ADSL	RBMS1	DEFB134					TMEM110	MED19		ESAM	TBX21	C4B-AS1
132	APOPT1	AFF2	RBX1	DENND1B					TMEM110-MUSTN1	MEF2C		ESRP2	THEMIS	C4BPA
133	ARFGEF2	AHDC1	REC114	DESI1					TMEM151A	MEGF11		ETF1	TMEM194B	C4BPB
134	ARHGAP15	ALDH5A1	RET	DH1					TMEM178B	METTL9		F2	TP53I3	C6orf10
135	ARHGAP27	ANK3	RILPL2	DH11					TMEM258	MGAT4C		FAM109B	TRIM36	C6orf48
136	ARID1B	ARHGEF9	RNF4	DHODH					TMUB2	MICB		FAM57B	TRIM72	C7orf34
137	ARIH2	ARX	RNU6-83P	DJB7					TOMM34	MIER1		FANCL	TTC21B	C7orf43
138	ARL17B	ATRX	RPS17	DLST					TRANK1	MOB4		FES	UBXN2A	C7orf61
139	ARMC1	AUTS2	RS2	DRD2					TSSK6	MR1		FGFR1	VKORC1	CA11
140	ARTN	BAZ2B	RSF1	DTD1					UBE2Q2L	MYBPC3		FHIT	VRK2	CADM4
141	ASIC4	BCKDK	SBNO1	DYNLRB1					UBTF	MYRF		FOXG1	ZEB2	CALR
142	ATG13	BRAF	SCAR15	EDEM2					UTP18	NEGR1		FOXP1	ZNF423	CAMTA2
143	ATP2A1	BRSK2	SETD8	EH					VPS45	NICN1		FSHB	ZNF629	CARD8
144	ATP6V0B	CAC1A	SGPP2	EHMT2					WDR73	NKAPL		FTCDNL1	ZNF646	CASS4
145	ATXN2L	CAC1C	SLC25A17	EIF2B2					WFDC12	NOX4		FURIN	ZNF668	CBLC
146	ATXN7L2	CAPRIN1	SLC4A10	EIF4G3					WFDC5	NRD1		FXR1	ZNF689	CCDC25
147	AUTS2	CASK	SNHG21	ELAVL2					XPNPEP1	NRG1		GA		CCDC6
148	BAG5	CASZ1	SPATS2	ELFN1					XPNPEP3	OLFM4		GABBR2	ADSL	CCDC61
149	BAIAP2	CDKL5	SRSF3	EMB					YJEFN3	OR12D3		GATAD2A	ALDH7A1	CCDC81
150	BCL11A	CHAMP1	SRSF4	EMX2					YPEL1	OR2B2		GDPD3	ALG13	CCDC83
151	BLOC1S2	CHD3	ST13	EP300					ZNF101	OTX2		GFOD2	ARHGEF9	CCND3
152	BMPR2	CHD7	STK38	EPHB1					ZNF592	PAX5		GID4	ARX	CCR7
153	BTAF1	CIC	TANC1	ERBB4					ZSCAN2	PAX6		GIGYF2	ATP1A2	CCT6P1
154	C10orf76	CNOT3	TANK	ERI1						PCDH9		GOLGA2P10	ATP6AP2	CD177
155	C12orf65	CSDE1	TBR1	ERI3					AC005609.1	PCDHA1		GOLGA2P7	CAC1A	CD177P1
156	C17orf47	CSNK2A1	TEF	ERICH1-AS1					ADCY2	PCDHA2		GOLGA6L10	CDKL5	CD22
157	C3orf84	CTCF	TENM2	ESR1					AGPAT1	PCDHA3		GOLGA6L17P	CHD2	CD244
158	C4orf45	CUL3	TENM4	ESRRG					AKAP2	PCDHA4		GOLGA6L4	CHR2	CD2AP
159	C5orf64	DDX3X	THRSP	EXD2					ALAS1	PCDHA5		GOLGA6L5P	CHR4	CD33
160	CAC1E	DHCR7	TMEM200B	EYS					ALOX5AP	PCDHA6		GOLGA6L9	CHR7	CD3EAP
161	CAC1I	DLG4	TOB2	F2					ANK3	PCDHA7		GPM6A	CHRNB2	CD40LG
162	CAC2D2	DMPK	TROAP	FAM120A					ARNTL	PCLO		GPR135	CLN2	CD46
163	CADM2	EBF3	TSHR	FAM120AOS					BTN2A1	PCNP		GPR52	CLN3	CD46P1
164	CALN1	EHMT1	TSPYL5	FAM167A					BTN3A2	PGBD1		GRAPL	CLN5	CD5
165	CALU	EP300	TUBA1C	FAM167A-AS1					CACNB2	PHF2		GRIN2A	CLN6	CD55
166	CAMKMT	FMR1	UBE2Q2P2	FAM180B					CADM2	PLA2R1		GRM3	CLN8	CD6
167	CAMKV	FOXG1	USP35	FAM183BP					CERS6	PLCG1		HAPLN4	CNTP2	CD7
168	CAMTA1	GIGYF2	VPS37B	FAM19A1					CLCN2	PLCL1		HARBI1	CSTB	CD79A
169	CCDC101	GRIN1	WDR60	FAM216A					CLIC1	PMFBP1		HCN1	CTSD	CD79B
170	CCDC134	GRIN2A	WDSUB1	FAM227A					CNTN5	POGZ		HIRIP3	DEPDC5	CD8A
171	CCDC39	HIVEP2	WHAMM	FAM228A					CWF19L1	PPID		HS3ST5	DJC5	CD8B
172	CCDC93	HNRNPH2	WWC1	FAM228B					DPCR1	PPP6C		HSPA9	DNM1	CDCA7L
173	CDC14B	HNRNPU	XPNPEP3	FAM49B					DSCR4	PQLC2L		HSPD1	DYRK1A	CDH2
174	CDH4	HRAS	XYLT1	FANCL					EML1	PROX2		HSPE1	EEF1A2	CEACAM16
175	CDH7	IQSEC2	ZC3H7B	FARP1					FKBP2	PRR16		HSPE1-MOB4	EPM2A	CEACAM19
176	CDK2AP1	KATL2	ZFYVE28	FASTKD5					FURIN	PRR34		HYDIN	FOLR1	CEACAM20
177	CDKAL1	KCNB1	ZNF33B	FBXL17					GABBR1	PRSS16		HYKK	FOXG1	CEACAM22P
178	CENPW	KDM3B	ZNF350	FBXL19					GRI	PSEN2		IGSF9B	GABRA1	CEACAMP10
179	CGREF1	KDM5C	ZNF37BP	FBXL4					HIST1H1B	PSORS1C1		IMMP2L	GABRB2	CEACAMP2
180	CHADL	KMT2A	ZNF432	FBXL5					HIST1H2AJ	PSORS1C2		INA	GABRB3	CELF1
181	CHMP2A	KMT5B	ZNF577	FBXO21					HIST1H2BL	PTPRS		INO80E	GABRG2	CEP41
182	CHUK	LZTR1	ZNF613	FBXO31					HIST1H3I	RAB27B		INPP4B	GAMT	CERK
183	CKB	MAGEL2	ZNF614	FCF1					HIST1H3J	RAB3B		IREB2	GATM	CFD
184	CLN3	MBOAT7	ZNF615	FDFT1					HIST1H4A	RABEPK		IRF3	GO1	CFP
185	CNBD2	MECP2	ZNF616	FHIT					HIST1H4L	RANGAP1		JKAMP	GOSR2	CHN1
186	CNOT4	MED13	ZNF649	FIGN					HN1	RBFOX1		KAT5	GRIN1	CHR2
187	COG5	MEF2C	ZNF841	FKBP1B					HTR6	RBMS3		KCNG2	GRIN2A	CHRNE
188	COL16A1	MEIS2		FMNL1					KCNB1	RERE		KCNJ13	GRIN2B	CISH
189	COL7A1	MSL3		FN1					KIAA1143	RFTN2		KCNK7	HCN1	CKM
190	CPD	MTOR		FNBP4					KIF15	RFWD2		KCNV1	HNRNPU	CLASRP
191	CPE	NBEA		FOXN4					LRRC57	RHOA		KCTD13	IQSEC2	CLIC1
192	CR1L	NCKAP1		GA					MAD1L1	RHOBTB1		KDM4A	KANSL1	CLPTM1
193	CRAT	NEXMIF		GAB2					MATN4	RPS6KL1		KIAA1324L	KC2	CLTCL1
194	CRHR1	NF1		GABBR1					MSH5	RSRC1		KMT2E	KCNB1	CLU
195	CSE1L	NIPBL		GALNS					MSH5-SAPCD1	RTN1		KMT2E-AS1	KCNC1	CNN2
196	CSRNP3	NLGN2		GALNT10					MSRA	SAMD5		L3HYPDH	KCNJ10	CNPY4
197	CTN2	NLGN3		GALNT16					NCAM1	SCAI		L3MBTL2	KCNMA1	CNTP1
198	CTNNB1	NLGN4X		GALNT2					NT5C	SCYL1		LCAT	KCNQ2	CNTP2
199	CUEDC2	NR4A2		GALNTL6					OR2B2	SDK1		LETM2	KCNQ3	COCH
200	CUL9	NRXN2		GCC1					OSBPL2	SEMA6D		LINC00051	KCNT1	COL11A2
201	CWF19L1	NRXN3		GFM1					PACSIN2	SERPING1		LINC00461	KCTD7	COL19A1
202	CYB561D1	PACS1		GGT7					PALM2-AKAP2	SF3B1		LINC00606	LGI1	COPS6
203	CYSTM1	PAH		GI2					PCDHA6	SGCZ		LINC00634	MAGI2	CPSF1
204	DAG1	PCCB		GLIS3					PGBD1	SGIP1		LINC00637	MBD5	CPSF2
205	DALRD3	PCDH19		GLT8D1					PI3	SHISA9		LINC00862	MECP2	CR1
206	DCAF16	PHF3		GLYCTK					PLEKHA2	SIM1		LINC00933	MEF2C	CR1L
207	DENND4A	PHIP		GNL3					PLEKHA8	SLC17A3		LINC01004	MFSD8	CR2
208	DENND4B	POMGNT1		GOSR2					PRKCB	SLC30A9		LINC01288	NHLRC1	CRB2
209	DEPDC1B	PSMD12		GPC6					PRM2	SLC44A4		LINC01416	NR2F1	CRELD1
210	DERA	PTCHD1		GPM6A					PROZ	SLC4A9		LINC01470	NRXN1	CRIP2
211	DGKZ	PTPN11		GPR37					PRRC2A	SORBS3		LINC01539	PCDH19	CRTC3
212	DHRS11	RALGAPB		GPSM3					RBMS3	SORCS3		LINC01648	PIGA	CSNK2B
213	DLGAP1	RELN		GRIK3					RBPJL	SOX5		LINC01720	PIGO	CSRP2BP
214	DND1	RERE		GRM3					RP11-451M19.3	SOX6		LINC01761	PIGV	CSTF1
215	DOCK2	RIMS1		GRM5					RP11-894J14.5	SPPL3		LINC01884	PNKP	CTB-120L21.1
216	DPP4	SCN8A		GRM8					RP5-966M1.6	SPRY2		LINC02060	POLG	CTB-129P6.11
217	DPYD	SETBP1		GSDMA					SEMG1	STAU1		LOC100506472	PPT1	CTB-129P6.4
218	DTNBP1	SETD1A		GSDMB					SEMG2	STK19		LOC101927295	PRICKLE1	CTB-171A8.1
219	DUS2	SETD2		GSS					SFTA2	TAL1		LOC101927839	PRICKLE2	CTB-179K24.3
220	DUSP11	SLC9A6		GT1					SH3RF3	TAOK3		LOC101928782	PRRT2	CTC-344H19.4
221	DVL3	SMARCA2		GTF2H4					SHANK2	TCAIM		LOC101928882	QARS	CTC-490G23.2
222	EEA1	SMARCA4		HARBI1					SLC17A1	TCF4		LOC102724034	SCARB2	CTC-490G23.4
223	EF5	SON		HCN1					SLC22A7	TCTEX1D1		LOC103171574	SCN1B	CTC-512J12.4
224	EFCAB5	SOX5		HDAC9					SLC4A1	TENM2		LOC283177	SCN8A	CTC-512J12.6
225	EFTUD1	SRCAP		HEMK1					SP4	TMEM106B		LOC338963	SIK1	CTC-512J12.7
226	EHBP1	SRPRA		HFE					STAB1	TMEM161B		LOC388436	SLC13A5	CTD-2020K17.3
227	ELAVL2	SYN1		HIST1H1B					STARD7	TMEM258		LOC440300	SLC25A22	CTD-2384B9.1
228	EP300	TANC2		HIST1H1C					SUMO2	TMEM42		LOC727751	SLC2A1	CTD-2501B8.5
229	EPB41	TBCK		HIST1H1E					SYNE1	TMEM67		LOC79999	SLC35A2	CTD-2534I21.8
230	EPHA5	TRIO		HIST1H1T					TBC1D21	TMX2		LRP1	SLC6A1	CTD-3065J16.6
231	ERAP2	TSC1		HIST1H2AC					TLR9	TOP1		LRRC48	SLC6A8	CTD-3065J16.9
232	ERBB3	TSC2		HIST1H2AI					TMEM108	TOPAZ1		LSM1	SLC9A6	CTLA4
233	ESRRG	TSHZ3		HIST1H2AJ					TMEM127	TRAF3		LUZP2	SPTAN1	CTN1
234	EXOC4	UBE3A		HIST1H2AK					TRIM26	TRMT10C		MAD1L1	STXBP1	CUEDC2
235	EXT1	UPF3B		HIST1H2AL					TRIM31	TRMT61A		MAN2A2	SYNGAP1	CXCL10
236	F2	USP9X		HIST1H2AM					TRIM38	TTC12		MAP3K11	TBC1D24	CXCR5
237	FAM120A	VPS13B		HIST1H2BC					TRPT1	TYR		MAPK3	TCF4	CXCR6
238	FAM160A1	WDFY3		HIST1H2BL					UBE2E3	UBE2M		MARS2	TPP1	CXXC11
239	FAM193A	YY1		HIST1H2BM					VWA7	USP3		MAU2	TSC1	CYB561
240	FAM76B	ZBTB20		HIST1H2BN					WSCD2	VPS41		MDK	TSC2	CYC1
241	FBXL17	ZNF292		HIST1H2BO					YWHAE	VRK2		MED19	UBE3A	CYP21A1P
242	FBXO31	ZNF462		HIST1H3B					ZKSCAN4	XRCC3		MEF2C	WDR45	CYP21A2
243	FGF8			HIST1H3E					ZKSCAN8	YLPM1		MEF2C-AS1	WWOX	CYP3A5
244	FLOT2			HIST1H3H					ZNF165	ZC3H7B		MGAT3		DACT1
245	FLRT1			HIST1H3I					ZNF318	ZCCHC7		MHC		DBF4B
246	FOXO3			HIST1H3J					ZNF365	ZDHHC21		MIR1281		DBP
247	FOXP1			HIST1H4C					ZNF445	ZDHHC5		MIR1284		DCAKD
248	FSCN3			HIST1H4J					ZNF501	ZFHX4		MIR130A		DDAH2
249	GABRG3			HIST1H4K					ZSCAN12	ZHX3		MIR137		DDB2
250	GATAD2B			HIST1H4L					ZSCAN16	ZKSCAN3		MIR137HG		DDX39B
251	GATB			HIVEP1					ZSCAN31	ZKSCAN4		MIR2682		DEF8
252	GCC1			HLA-DRA						ZKSCAN7		MIR3160-1		DGAT1
253	GGNBP2			HOXB2						ZKSCAN8		MIR3160-2		DHX30
254	GJC1			HOXB7						ZMAT2		MIR33A		DMPK
255	GLCCI1			HS3ST5						ZNF165		MIR33B		DMWD
256	GLIS3			HSD3B7						ZNF184		MIR4301		DPYSL2
257	GLRX2			HSPA1A						ZNF197		MIR4304		DUSP3
258	GLT8D1			HSPA1L						ZNF322		MIR4472-1		DXO
259	GOSR1			HYAL1						ZNF35		MIR4489		EBF1
260	GPR26			HYAL3						ZNF445		MIR4655		ECHDC3
261	GPX1			ICA1L						ZNF501		MIR4677		EDAR
262	GRIA4			IFRD2						ZNF536		MIR4688		EDEM2
263	GRIN2A			IGSF9B						ZNF638		MIR4690		EED
264	GRIN3A			IL20RB						ZNF660		MIR5088		EFTUD2
265	GRK6			IMMT						ZSCAN12		MIR548AI		EGFL8
266	GRM3			IPO11						ZSCAN16		MIR548AJ2		EHBP1L1
267	GT1			IPO9						ZSCAN26		MIR6773		EHMT2
268	GYLTL1B			ISCA2						ZSCAN31		MIR6777		EIF1B
269	HABP4			ITCH						ZSCAN9		MIR6843		EIF5AP3
270	HARS			ITGA2B						AADAT		MIR6889		ELP3
271	HARS2			ITGAX						AATK		MIR8072		EML2
272	HBEGF			ITIH1						ABCA12		MIR9-2		ENC1
273	HIST1H2BN			ITIH3						ABHD11		MMP16		EOMES
274	HMGN1			ITIH4						ABHD16A		MOB4		EPHA1
275	HMGN4			ITPR3						ACADS		MPHOSPH9		EPHA1-AS1
276	HSF5			KANSL1						ACO2		MPP6		EPHA4
277	IGF2BP1			KAT8						ACP2		MPPED2		EPHB4
278	IGSF9B			KBTBD4						ACTBP15		MSANTD2		EPHB6
279	IK			KCNIP4						ACTR5		MSL2		EPHX2
280	IKZF2			KCNJ3						ACYP1		MSRA		EPPK1
281	IMMP2L			KCTD10						ADARB1		NCAN		ERCC1
282	IMPDH2			KDM3A						ADAT2		NCK1		ERCC2
283	IP6K1			KIAA0101						ADGRD2		NCK1-AS1		ERCC3
284	IPO13			KIFC1						ADH5P4		NDFIP2		ERG
285	IPO9			KIRREL3						ADI1P1		NDFIP2-AS1		ERO1L
286	IST1			KLF11						ADSL		NDRG4		ETFA
287	JMJD1C			L3MBTL2						AGBL2		NDUFA13		ETFB
288	KALRN			LIN28B						AIG1		NDUFA4L2		ETHE1
289	KANSL1			LINGO1						AKAP9		NDUFA6		EVI2B
290	KCNH5			LINGO2						ALG1L12P		NDUFA6-AS1		EXOC3L2
291	KCNIP2			LMOD1						AMBRA1		NEK1		EXOSC4
292	KCNJ3			LMTK2						AMN		NFATC3		FADS2
293	KDM4A			LOC643355						AMT		NGEF		FAM102A
294	KDM4C			LRLE1						ANGPTL2		NLGN4X		FAM115D
295	KHK			LRP4						ANKHD1-DT		NMB		FAM131B
296	KIF16B			LRRC37A						ANKRD13A		NRGN		FAM134B
297	KLC1			LRRC37A2						ANKRD44		NRN1L		FAM171A1
298	KLHDC8B			LRRC7						APBB3		NT5C2		FAM171A2
299	LARP7			LSAMP						ARF1P2		NUTF2		FAM180B
300	LCORL			LSM2						ARFGAP2		NXPH4		FAM209A
301	LMF1			LSMEM2						ARHGAP9		OGFOD2		FAM209B
302	LNPEP			LTBP2						ARIH2		OGFRP1		FAM210B
303	LOC339862			LXN						ARIH2OS		OPCML		FAM63B
304	LPP			MAD1L1						ARL14EP		OTOL1		FAM81A
305	LRP1B			MADD						ARL3		OTUD7B		FAM83E
306	LRPPRC			MAGI1						ARPC3		PAK6		FBLN5
307	LRRC14			MAP1LC3A						ARPC5L		PARD6A		FBXO24
308	LRRC24			MAP1LC3B						AS3MT		PBX4		FBXO46
309	LRRC37A			MAPT						ATAT1		PCCB		FCER2
310	MACROD2			MBD5						ATG16L1		PCGF6		FCGBP
311	MAML3			MBNL2						ATP13A4		PCNXL3		FCRLA
312	MAN2A1			MCHR1						ATP1B1P1		PDE4B		FERMT2
313	MAPK8IP1			MDGA1						ATP2A2		PGM3		FGF21
314	MAPT			ME1						ATP5MK		PITPNM2		FHIT
315	MARCHF5			MED19						ATP6V1G2		PITPNM2-AS1		FKBPL
316	MARK3			MED24						ATXN1		PJA1		FNBP4
317	MARVELD3			MED27						B3GLCT		PLA2G15		FOSB
318	MAST4			MEF2C						BAG6		PLCB2		FOXP3
319	MCU			MEI1						BAIAP2		PLCH2		FTSJ3
320	MECR			METTL14						BAK1		PLCL1		FUT1
321	MED27			METTL16						BMERB1		PLCL2		FUT2
322	MEF2C			MFHAS1						BOLL		PLEKHO1		FZD2
323	MGAT3			MFSD13A						BORCS7		PPAPDC1B		GAL3ST4
324	MGEA5			MFSD2B						BORCS7-ASMT		PPP1R13B		GAS7
325	MICU1			MKL1						BSN-DT		PPP1R16B		GATS
326	MIEF1			MLF1						BTBD18		PPP2R2A		GBP1
327	MON1A			MLH3						BTN2A2		PPP2R3A		GBP2
328	MORC2			MMAB						BTN2A3P		PPP4C		GCNT7
329	MPHOSPH9			MMP24						BTN3A1		PRKCB		GEMIN7
330	MRAS			MMRN1						C11orf49		PRKD1		GIF
331	MRC2			MMS22L						C12orf43		PRMT1		GIGYF1
332	MRM1			MRM2						C1QTNF4		PRR12		GO1
333	MSL2			MRPS14						C2orf66		PRRG2		GNB2
334	MSMO1			MSH5						C3orf62		PSD3		GNGT2
335	MUSTN1			MSL2						C3orf86		PSKH1		GNPDA1
336	MYBPC3			MSRA						C4B		PSMA4		GNPT1
337	MYBPHL			MTCH2						C6orf15		PSMB10		GPANK1
338	N6AMT2			MTMR3						C9orf64		PSMD6		GPATCH8
339	NCAM1			MTMR9						CABP1-DT		PSMD6-AS2		GPC2
340	NCKIPSD			MUSTN1						CACNA2D1		PTK2B		GPER1
341	NCOA2			MVK						CALHM2		PTN		GPR111
342	NDUFA2			MYBPC3						CARM1P1		PTPRF		GPR115
343	NEGR1			MYH7B						CBX3P7		PTPRK		GPR183
344	NFATC2IP			MYO1H						CC2D2A		R3HDM2		GPR4
345	NFIX			NCAM1						CCDC71		RABGAP1L		GPSM3
346	NFKB2			NCK1						CCDC73		RAI1		GPX3
347	NFS1			NCOA5						CCDC92		RALGAPA2		GPX4
348	NICN1			NCOA6						CCHCR1		RANBP10		GRIN3B
349	NKAIN2			NDST3						CCT7P2		RANGAP1		GRI
350	NKIRAS1			NDUFAF8						CD14		RBFOX1		GRN
351	NLRC4			NDUFS3						CD276		RBM26		GULOP
352	NME9			NEFL						CD40		RBM26-AS1		HAVCR1
353	NOL4L			NEGR1						CD83P1		RC3H1		HAVCR2
354	NOVA1			NEIL2						CD8A		RD3L		HCG23
355	NPAS1			NEK4						CDC42BPB		RELA		HCP5
356	NPAS3			NEK7						CDCA4P1		RERE		HEXIM2
357	NPM3			NEK9						CDCA7		RFT1		HIF3A
358	NR1D2			NISCH						CDSN		RFTN2		HKDC1
359	NRBF2			NOL4						CELF1		RGS6		HLA-B
360	NSF			NOS1						CELSR3		RILPL2		HLA-C
361	NSRP1			NOTCH4						CENPM		RIMS1		HLA-DMA
362	NSUN3			NOVA2						CES5A		RLTPR		HLA-DMB
363	NTRK3			NR1D1						CHADL		RPEL1		HLA-DOA
364	NUDT12			NR1H3						CHCHD2P9		RPS17		HLA-DOB
365	NYAP2			NR4A3						CIAO2A		RPS19BP1		HLA-DPA1
366	OAZ2			NRP2						CIBAR1-DT		RPTOR		HLA-DPB1
367	OGFOD2			NRXN1						CIR1		RRAS		HLA-DPB2
368	OR2B2			NSF						CKAP5		RSEH2C		HLA-DQA1
369	OR8B2			NT5C2						CLIC1P1		RWDD2A		HLA-DQA2
370	OR8B3			NT5DC2						CLOCK		SATB2		HLA-DQB1
371	OR8G2			NTRK2						CLP1		SBNO1		HLA-DQB1-AS1
372	PALM			NUP160						CNMD		SCAF1		HLA-DQB2
373	PBRM1			NYAP2						CNNM2		SCAND2P		HLA-DRA
374	PCBP2			OR11A1						CNTF		SDCCAG8		HLA-DRB1
375	PCCB			OR9Q1						CNTLN		SEC11A		HLA-DRB5
376	PCDHAC1			ORAI3						CNTNAP5		SEMA6D		HLA-DRB6
377	PDE4D			ORC4						COA8		SEPTIN3		HLA-DRB9
378	PEF1			ORMDL3						COL7A1		SERPINC1		HLA-S
379	PELI1			P2RX3						COQ10B		SERPING1		HMGB2P1
380	PEX16			PABPN1L						COQ5		SETD6		HMHA1
381	PFDN1			PACSIN3						CRH		SETD8		HNRNPA1P2
382	PFKFB4			PAFAH1B1						CSDC2		SEZ6L2		HNRNPM
383	PHACTR3			PARD3B						CTDP1		SF3B1		HOXA5
384	PHF2			PARK7						CTNNA3		SFMBT1		HOXB2
385	PHF20			PAX4						CTSC		SFXN5		HOXB4
386	PIK3R2			PAX6						CXXC5		SHISA8		HSD17B14
387	PITPNM2			PBRM1						CYCSP25		SHMT2		HSPA1B
388	PITX3			PCBP4						CYP17A1		SIPA1		HSPA1L
389	PKD1L3			PCCB						CYP2D6		SLC12A4		ICAM2
390	PLA2G15			PCLO						CYP7B1		SLC32A1		ID2
391	PLCB1			PDZD8						CYSTM1		SLC35G2		IGHA2
392	PLEKHG7			PEBP1						DAAM1		SLC38A7		IGHG4
393	PLEKHM1			PER1						DAG1		SLC39A8		IGHV3-49
394	PLX4			PGBD1						DAGLA		SLC45A1		IGJ
395	POU6F2			PGF						DALRD3		SLC7A6		IGSF23
396	PPA2			PHF2						DAND5		SMCR5		IL21R
397	PPM1E			PHF5A						DCAF4L1		SMDT1		IL2RA
398	PPP2R3A			PIEZO1						DCDC2		SMG6		IL34
399	PPP2R4			PIGU						DDAH2		SNORA46		INPP4B
400	PRKAG1			PKHD1						DDB2		SNORA76A		INPP5D
401	PRKAR2A			PLCL2						DDR1		SNORD63		ISM1
402	PRKD1			PLEKHM1						DDX27		SNORD91A		ITGA2B
403	PROS1			PLGLB1						DDX39B		SNORD91B		ITGAE
404	PRR7			PLTP						DDX6		SNX19		ITGAL
405	PSD			PMM1						DEPDC7		SOX2-OT		ITPR3
406	PSMA5			POLR3H						DESI1		SOX5		IZUMO1
407	PSMC3			POU6F2						DGKZ		SP91		KBTBD4
408	PSME4			PPM1M						DHFRP2		SPATA31D1		KCB3
409	PSMG1			PPP2R3A						DNAH1		SPATS2L		KCNN4
410	PTCH1			PRKCA						DNAJC24		SREBF1		KIAA0125
411	PTGER3			PROX2						DND1		SREBF2		KIAA1875
412	PTPRD			PRR14						DPY19L1P2		SRPK2		KIF1C
413	PTPRF			PRRC2A						DYNLL1		SRR		KIR3DL2
414	PTPRN2			PRSS12						DZIP1		STAC3		KISS1R
415	PTPRO			PRSS16						DZIP3		STAG1		KLC3
416	PTPRT			PRSS36						EBLN3P		STAR		KLHDC8B
417	PURG			PRSS53						EEF1A1P23		STAT6		KLHL14
418	QARS			PSMC3						EEF1B2P7		SUGP1		KLRB1
419	RABEP2			PSMD3						EFHD1		T8		KMO
420	RABGAP1L			PSORS1C1						EI24P3		TAB1		L47234.1
421	RAD51C			PTCH1						EIF3M		TAOK2		LACTB
422	RAI1			PTPMT1						EIF4A2P3		TBC1D5		LAMTOR4
423	RANGAP1			PTPRJ						EIF4EBP3		TBX6		LARGE
424	RBFOX1			PXMP4						EIF4H		TCF20		LDLRAP1
425	RBM12			RAB27B						EIF5		TCF4		LEF1
426	RBM5			RABEPK						ELP4		TDRD9		LEPREL1
427	RBM6			RABGAP1L						EP300-AS1		THAP11		LILRA3
428	RBMS1			RANGAP1						ESR1		THOC7		LILRA4
429	REEP3			RAPSN						EVX2		THOC7-AS1		LILRA5
430	RHEBL1			RASSF1						EXOC3L4		TLE3		LILRB1
431	RHOA			RBFOX1						EYA2		TM6SF2		LILRB2
432	RIMS2			RBM6						F2		TMEM161B-AS1		LILRB5
433	RNF182			RBX1						FADS3		TMEM194A		LILRP2
434	ROMO1			RC3H1						FAHD2B		TMEM219		LIMS2
435	RORA			RCN1						FAM110B		TMEM243		LIPC
436	RPL15			REEP1						FAM180B		TMX2		LRCH4
437	RTN1			RERE						FAM220A		TMX2-CTNND1		LRIG1
438	RUNX1T1			RFC5						FARP1		TNFRSF13C		LRRC14
439	SAXO2			RGS6						FBXL17		TOM1L2		LRRN3
440	SCG3			RNF103						FBXO10		TP53TG1		LSM2
441	SENP6			RNF103-CHMP3						FEN1		TRANK1		LST1
442	SEPTIN3			RNF166						FES		TSR1		LTA
443	SEPTIN4			RNF40						FGFR3P1		TSRE1		LTB
444	SERPING1			ROBO2						FKBP1BP1		TSSK6		LY6G5B
445	SFMBT1			RP1L1						FLOT1		TSXIP1		LY6G5C
446	SHANK3			RPS6KL1						FNBP4		TYW5		LY6G6C
447	SHISA9			RS2						FOLH1		U80770		LYN
448	SIRPA			RSRC1						FOLH1B		UBE2Q2L		LYPD2
449	SIX3			SAMD3						FRAT2		UBE2Q2P1		MADD
450	SKA2			SATB2						FURIN		UBE2Q2P2		MAF1
451	SLC25A20			SBF2						GAPDHP37		UBE3D		MAL
452	SLC38A3			SEMA3F						GATC		VPS13C		MAMSTR
453	SLC39A1			SEMA6D						GFM1		VPS45		MAP3K2
454	SLC39A13			SERPINC1						GIGYF2		VRK2		MARK4
455	SLC4A9			SERPING1						GIT2		VSIG2		MBLAC1
456	SLC6A4			SETD1A						GKAP1		WBP1L		MCM7
457	SLC8A3			SFMBT1						GLIS3		WBP2NL		MDFIC
458	SMIM4			SFTA2						GLT8D1		WDR73		ME3
459	SMPD3			SFXN2						GLTP		WHSC1L1		MEG3
460	SMYD5			SGCZ						GLYCTK		XRCC3		MEOX1
461	SND1			SGK223						GLYCTK-AS1		YJEFN3		MEPCE
462	SNX29			SHISA4						GMPPB		YPEL3		MICA
463	SORBS1			SHISA9						GNAO1		YPEL4		MICB
464	SORCS3			SHOX2						GNE		ZBTB37		MINK1
465	SORT1			SI3						GNL3		ZC3H7B		MIR106B
466	SP4			SIM1						GOLGA1		ZDHHC5		MIR142
467	SPAST			SIPA1L1						GPN3		ZEB2		MIR25
468	SPCS1			SKIV2L						GPR155		ZFYVE21		MIR3135B
469	SPEG			SLC12A5						GPR26		ZNF408		MIR330
470	SPI1			SLC17A3						GPR89P		ZNF536		MIR4487
471	SPPL2A			SLC25A17						GPX1		ZNF592		MIR4658
472	SPPL2C			SLC30A9						GRIA1		ZNF804A		MIR4736
473	SRA1			SLC35C2						GRIK2		ZNF823		MIR600HG
474	SREBF1			SLC35G2						GRK4		ZSCAN2		MIR661
475	SREBF2			SLC35G5						GRM5-AS1		ZSWIM6		MIR93
476	SRPK2			SLC39A13						GSDME				MIS12
477	SRSF4			SLC43A3						GTF2H4		AC005477.1		MMP28
478	STAG1			SLC44A4						GUCA1C		AC005609.1		MOSPD3
479	STAU1			SLC44A5						GUSBP2		AC027228.1		MPO
480	STH			SLC7A11						H1-12P		AC073043.2		MPZL1
481	SULT1A1			SLC7A8						H1-5		AL049840.1		MROH2A
482	SUPT4H1			SMDT1						H2AC11		APH1A		MRPS26
483	SYPL2			SMIM4						H2AC12		APOPT1		MS4A14
484	SZT2			SMTNL1						H2AC13		ARL3		MS4A2
485	T8B			SNCA						H2AC14		BAG5		MS4A3
486	TAB1			SNU13						H2AC15		C11orf87		MS4A4A
487	TAL1			SNX1						H2AC16		C12orf42		MS4A4E
488	TAPBP			SORCS3						H2AC17		C12orf79		MS4A6A
489	TCERG1L			SOX5						H2AC5P		C1orf132		MS4A6E
490	TCF20			SOX6						H2AC6		C1orf51		MS4A7
491	TCTA			SP4						H2BC11		C1orf54		MSH5
492	TENM4			SPATA32						H2BC12		CACNA1C		MSL3P1
493	THRB			SPATS2						H2BC13		CACNA1I		MSX2P1
494	TIGL1			SPCS1						H2BC14		CCDC39		MT1F
495	TLK2			SPI1						H2BC15		CD14		MT2A
496	TMEM110			SPPL2C						H2BC16P		CD46		MTCH2
497	TMEM110-MUSTN1			SREBF2						H2BC17		CDC25C		MTCO3P1
498	TMEM170B			ST8SIA1						H2BC6		CHRNA3		MTMR4
499	TMEM258			STAB1						H2BC7		CHRNA5		MUC12
500	TNRC18			STAG1						H3C10		CKB		MVB12B
501	TNRC6A			STH						H3C11		CNKSR2		MYBBP1A
502	TRAIP			STK17A						H3C12		CR1L		MYBPC3
503	TRIM31			STK19						H3C2		CTNNA1		MYRIP
504	TRIM37			STK24						H3C9P		CYP26B1		PRT1
505	TRIP4			STX1B						H3P23		DFNA5		T9
506	TRMT61A			STX4						H3P26		DNAJC19		NCALD
507	TROVE2			SUDS3						H4C10P		DND1		NCR3
508	TSRE1			SYT13						H4C11		DPP4		NDUFA3P1
509	TUFM			SYT16						H4C12		DRG2		NDUFS3
510	TULP4			TAL1						H4C13		EGR1		NELFE
511	UBA7			TAOK3						H4C4		EPC2		NELL2
512	UBE2E1			TAT						H4C9		FAM53C		NENF
513	UGP2			TCF4						HACE1		FUT9		NEU1
514	VAC14			TECPR1						HARS1		GALNT10		NFKBIL1
515	VPS41			TEF						HBEGF		GFRA3		NFYA
516	VPS54			TENM2						HCG11		GLT8D1		NGEF
517	WDR46			THADA						HCG14		GNL3		NKPD1
518	WDR6			THRA						HCG22		GRAMD1B		NLRP1
519	WNT3			TIMM10						HCG27		GRIA1		NOTCH4
520	WNT4			TLR4						HFE		HARS		NR1H3
521	WRN			TMEM106B						HLA-C		HARS2		NRCAM
522	XRCC3			TMEM110						HLA-S		IK		NT5E
523	ZBTB22			TMEM110-MUSTN1						HMGB3P26		ITIH1		NTN5
524	ZGRF1			TMEM115						HNF1A-AS1		ITIH3		NUP160
525	ZMAT2			TMEM161B						HNRNPA1P29		ITIH4		NUP88
526	ZNF324B			TMEM33						HOXD11		KCNB1		NYAP1
527	ZNF385D			TMEM55A						HOXD12		KDM3B		OARD1
528	ZNF501			TMPRSS5						HOXD13		KLC1		OOSP2
529	ZNF609			TMX2						HSDL2		LRRIQ3		OPA3
530	ZNF777			TMX2-CTNND1						HSPA2		MAN2A1		OPLAH
531	ZNF800			TNXB						HSPD1		MLL5		OR2A20P
532	ZNF821			TOB2						HSPE1		MUSTN1		OR2AE1
533	ZNHIT3			TOX3						HVCN1		MYO15A		OR2R1P
534	ZSWIM6			TP53I3						HYAL3		MYO1A		OSBPL10
535				TP53INP2						ID2B		NAB2		OXD1
536				TRAPPC2L						IER3		NAGA		PAQR8
537				TRHR						IFT81		NDUFA2		PARP1
538				TRIM27						IGIP		NEK4		PARP10
539				TRIM31						IHO1		NISCH		PARVG
540				TRIM38						INA		NOSIP		PBX2
541				TRPC4AP						INAFM1		NT5DC2		PCOLCE
542				TRPS1						INSYN1		OSBPL3		PCOLCE-AS1
543				TSRE1						INSYN1-AS1		PBRM1		PDCD1
544				TTC12						IQCB2P		PCDHA1		PHB
545				TYR						KBTBD4		PCDHA10		PHGDH
546				UBE2L6						KCNG2		PCDHA2		PHOSPHO1
547				UBE3B						KCNJ13		PCDHA3		PHTF2
548				UBOX5						KDM4B		PCDHA4		PICALM
549				UBXN2A						KDM6B		PCDHA5		PIK3IP1
550				UGP2						KIAA0825		PCDHA6		PILRA
551				UNG						KIF26A		PCDHA7		PILRB
552				USMG5						KLF7		PCDHA8		PLA2G4C
553				USP34						KLHDC8B		PCDHA9		PLA2G7
554				USP35						L3MBTL2		PCGEM1		PLAUR
555				V1						LAMB2		PDCD11		PLD2
556				VAMP3						LAMB2P1		PODXL		PLEC
557				VARS						LHX2		PTGIS		PLEKHB1
558				VKORC1						LIN28B-AS1		PUS7		PLLP
559				VPS41						LIN52		RCN3		PLXDC1
560				VRK2						LINC00240		REEP2		PMS2P1
561				VSIG10						LINC00336		SFXN2		PNOC
562				VWA7						LINC00382		SGSM2		POLB
563				WBP1L						LINC00461		SLC4A10		POLR2D
564				WBP2NL						LINC00533		SLC7A6OS		POLR2E
565				WDR12						LINC00558		SMIM4		POLR2M
566				WDR82						LINC00899		SNAP91		POMZP3
567				WNK2						LINC01038		SPCS1		PPM1E
568				WNT3						LINC01065		STAB1		PPM1N
569				WSB2						LINC01068		STIMATE		PPP1R13L
570				XKR6						LINC01080		STIMATE-MUSTN1		PPP1R16A
571				XPNPEP3						LINC01102		TAC3		PPP1R2P1
572				XRCC6						LINC01277		TAF5		PPP1R35
573				YLPM1						LINC01400		TLE1		PPP1R37
574				YPEL4						LINC01414		TMCO6		PPT2
575				ZBED4						LINC01415		TMTC1		PPT2-EGFL8
576				ZC2HC1C						LINC01613		TRIM8		PRCP
577				ZC3H7B						LINC01919		TRMT61A		PRICKLE1
578				ZCCHC14						LINC01923		TSNARE1		PRKAR1B
579				ZDHHC5						LINC01929		TSNAXIP1		PROC
580				ZKSCAN3						LINC01938		USMG5		PRPS1P2
581				ZKSCAN4						LINC01965		VPS14C		PRR11
582				ZKSCAN8						LINC01988		WDR55		PRRC2A
583				ZMYND10						LINC02060		ZMAT2		PRRT1
584				ZNF165						LINC02144		AC068490.2		PSG4
585				ZNF184						LINC02275		ACE		PSG5
586				ZNF23						LINC02323		ACTR1B		PSG9
587				ZNF341						LINC02394		C12orf43		PSMB8
588				ZNF391						LINC02429		CALN1		PSMB9
589				ZNF536						LINC02619		CISD2		PSMC3
590				ZNF609						LNPK		CREB3L4		PSMC6
591				ZNF646						LPXN		CRHR1		PSME1
592				ZNF668						LRFN5-DT		CTD-2008L17.2		PTCD1
593				ZNF800						LRP4		CUL9		PTGDR
594				ZNF804A						LRPAP1		CYP7B1		PTGER2
595				ZPBP2						LRRC37A14P		DARS2		PTK2B
596				ZSCAN16						LSAMP		DCC		PTPMT1
597				ZSCAN23						LUZP2		DCLK3		PTPN6
598				ZSCAN31						LXN		DJA3		PTPRJ
599				ZSCAN9						LY6G5C		DLGAP2		PVR
600										LY6G6C		ENOX1		PVRIG
601										MAD1L1		ENSG00000262319		PVRIG2P
602										MADD		EYS		PVRL2
603										MAFK		FAM114A2		QSOX2
604										MALINC1		FAM216A		RAB11FIP5
605										MAML3		FAM83D		RAB5A
606										MANEA-DT		FTSJ2		RAB8B
607										MARCKSL1P1		GPR98		RABEP1
608										MARS2		GRM1		RAC2
609										MCFD2P1		HYI		RAD51C
610										MCHR1		IL1RAPL1		RAPSN
611										MCHR2		KANSL1		RARRES3
612										MCTP1		KIAA1549		RASIP1
613										MEF2C-AS2		KLF6		RBM38
614										MEI1		LINC00320		REG4
615										MELK		LINC01068		RELB
616										MFAP3L		LINC01088		RHOBTB1
617										MICA		LRRC4B		RIN3
618										MINDY4B		MAPT		RN7SKP116
619										MIR130A		MLXIP		RN7SKP95
620										MIR3143		MSI2		RN7SL32P
621										MIR4271		MYO19		RN7SL345P
622										MIR4301		NEBL		RN7SL368P
623										MIR4318		NEGR1		RN7SL416P
624										MIR4487		NRIP1		RN7SL53P
625										MIR4528		NXPH1		RN7SL588P
626										MIR4529		PCGF3		RN7SL652P
627										MIR4766		PDIA3		RN7SL836P
628										MIRLET7BHG		PTPRD		R5SP207
629										MLEC		RP11-10L12.4		RNF111
630										MLF1		RP11-165J3.6		RNF167
631										MLH3		RP11-399D6.2		RNF43
632										MMAB		RP11-490G2.2		RNF5
633										MPIG6B		RP11-507B12.2		RNU1-60P
634										MPPED2		RP11-53O19.3		RNU1-61P
635										MPRIPP1		RP11-586K2.1		RNU5E-10P
636										MRM2		RP11-73M18.2		RNU6-1302P
637										MRPS31P4		SGCD		RNU6-2
638										MRPS33		SLC9B1		RNU6-560P
639										MRPS33P4		SP4		RNU6-603P
640										MRTFA		THAP8		RNU6-611P
641										MSANTD1		TRPC4		RNU6-926P
642										MSH5		TXNRD1		RNU7-135P
643										MSI1		WBSCR17		RNU7-182P
644										MST1		WDR76		RP1-229K20.5
645										MTCH2		WSCD2		RP1-62O9.3
646										MTHFD1		ZNF835		RP11-1079K10.1
647										MYH15		ABHD2		RP11-1079K10.2
648										MYO18A		AC003088.1		RP11-1079K10.3
649										MYRF-AS1		AC004159.1		RP11-1079K10.4
650										MZB1		AC005609.2		RP11-123C21.1
651										NAA11		AC007228.5		RP11-123C21.2
652										NAGA		AC007391.2		RP11-138I18.1
653										NCKIPSD		AC008085.1		RP11-138I18.2
654										NCOA5		AC009518.2		RP11-15A1.2
655										NCOR2		AC009518.3		RP11-15A1.3
656										NDFIP2		AC009518.4		RP11-15A1.7
657										NDFIP2-AS1		AC010295.1		RP11-161M6.2
658										NDUFA2		AC011330.5		RP11-244F12.2
659										NDUFAF3		AC013467.1		RP11-284B18.3
660										NDUFB4P5		AC018512.1		RP11-286H15.1
661										NDUFS3		AC074091.13		RP11-289A15.1
662										NEK4		AC078842.3		RP11-291B21.2
663										NEK6		AC083873.4		RP11-304F15.3
664										NFIX		AC091969.1		RP11-30K9.1
665										NFKBIL1		AC092625.1		RP11-30K9.4
666										NGEF		AC103965.1		RP11-30K9.5
667										NISCH		AC104451.2		RP11-30K9.6
668										NOLC1		AC104801.1		RP11-30K9.7
669										NOP56P1		AC105049.1		RP11-313H3.1
670										NPHP3-AS1		AC108056.1		RP11-326K13.4
671										NPIPA1		AC156455.1		RP11-333E1.1
672										NPIPA2		AFG3L1P		RP11-343H5.6
673										NPIPA5		ago-01		RP11-371E8.2
674										NPIPB4		ago-03		RP11-385F7.1
675										NPM1P27		ago-04		RP11-395B7.4
676										NPM1P46		ANKRD11		RP11-44M6.1
677										NR1H3		ANKRD45		RP11-44M6.3
678										NR2F1		AP3D1		RP11-465B22.3
679										NR3C1		AP5B1		RP11-46I8.1
680										NR5A1		ARL17A		RP11-46I8.3
681										NRG2		ARL17B		RP11-506M12.1
682										NT5C2		ARL5B		RP11-50C13.1
683										NT5DC2		ARTN		RP11-51F16.8
684										NTRK2		ASIC1		RP11-521O16.1
685										NUFIP2		ATF4		RP11-521O16.2
686										NUP160		BBX		RP11-54O7.14
687										OLA1		BCL7A		RP11-550C4.6
688										OPA1		BHLHE22		RP11-564A8.8
689										OPALIN		BRD8		RP11-57I17.3
690										OR1F12		BRE		RP11-589M4.1
691										OR2B7P		C10orf95		RP11-589M4.2
692										OR2B8P		C1orf106		RP11-589M4.3
693										OR2W2P		C1orf216		RP11-589M4.4
694										OR2W4P		CACNA1S		RP11-661A12.9
695										OR2W6P		CAMKK2		RP11-664D1.1
696										OR4B1		CATSPER2		RP11-672A2.4
697										OR4C3		CATSPER2P1		RP11-6J21.2
698										OR4C5		CDC20		RP11-736I10.2
699										OR4S1		CDIP1		RP11-750H9.5
700										OR4X1		CDK10		RP11-750H9.7
701										OR5AK2		CEBPZ-AS1		RP11-758P17.2
702										OR5B17		CENPL		RP11-758P17.3
703										OR5BA1P		CHMP1A		RP11-78B10.2
704										OR7E102P		CHRNA2		RP11-812I20.2
705										OR9Q1		CLIC1P1		RP11-81K2.1
706										OTOA		CLSPN		RP11-90K17.2
707										P2RX4		CNNM3		RP4-604G5.1
708										P2RX7		CORO7-PAM16		RP5-1050D4.3
709										P4HTM		CPNE7		RPL32P1
710										PACRG		CRHR1-IT1		RPL34
711										PACSIN3		CRTC2		RPL39P
712										PALS2		CSPG4P11		RPL7L1P5
713										PARN		CTAGE16P		RPL7P60
714										PAUPAR		CTB-35F21.1		RPS16P9
715										PBRM1		CTC-498M16.2		RPS18
716										PBX3		CTD-2134A5.4		RPS27L
717										PCDH8		CTD-2232E5.2		RPS6KA1
718										PCDH8P1		CTD-2320B12.1		RRP36
719										PCDHA10		CTD-2320B12.2		RSPH6A
720										PCDHA11		CTD-2501B8.5		RTFDC1
721										PCDHA12		CTD-2544L4.1		RTN1
722										PCDHA13		CTD-3224K15.3		RTN2
723										PCDHA14		CXXC5		RUNDC3A
724										PCDHA8		DBNDD1		S100B
725										PCDHA9		DEF8		SAFB
726										PCDHAC1		DENND4B		SAP25
727										PCDHB10		DLX1		SAPCD1-AS1
728										PCDHB12		DLX2		SCARA3
729										PCDHB13		DNAJA3		SCIMP
730										PCDHB15		DNAJC11		SCRIB
731										PCDHB17P		DND1P1		SDHAF2
732										PCDHB3		DOT1L		SEC13
733										PCDHB5		DPEP1		SEC1P
734										PCDHB7		EFNA5		SEL1L3
735										PCDHGB2		EGLN1P1		SELENBP1
736										PCGF6		EIF5		SELP
737										PCMTD1		ELL3		SEMA4D
738										PDCD11		ELOVL1		2025-09-04
739										PDCL2		ENSG00000265315		SERPINB6
740										PDXDC1		ENSG00000265411		SETP14
741										PEBP1		ENSG00000266504		SETP17
742										PFDN1		ENSG00000278770		SFRP5
743										PFKFB4		EXOC4		SFTPD
744										PFKL		FAHD2B		SGK223
745										PFN1P11		FAM120A		SH3BGRL3
746										PGAP1		FAM120AOS		SHARPIN
747										PIGFP2		FAM178B		SIGLEC21P
748										PIPOX		FAM186A		SIGLEC22P
749										PLCB3		FAM215B		SIGLEC7
750										PLEKHB1		FANCA		SIT1
751										PLGLB1		FANCI		SIX5
752										POC1A		FOXO3		SKA2
753										POLR1E		FRMD5		SKIV2L
754										POLR2LP1		FRMPD4		SLAMF1
755										POLR3H		FUT10		SLC12A9
756										POM121L6P		GATAD2B		SLC16A10
757										POP5		GLB1L2		SLC16A9
758										POU2F2		GLYCTK		SLC22A17
759										POU5F2		GMEB1		SLC24A4
760										PPIAP42		GULOP		SLC25A11
761										PPP1R16B		HEATR5B		SLC25A1P1
762										PPTC7		HMGB3P24		SLC25A39
763										PRKAR2A		HMGB3P26		SLC36A1
764										PRPS1P2		HMOX2		SLC39A13
765										PRR34-AS1		HNF1A		SLC52A1
766										PRRG4		HNRNPA1P39		SLTM
767										PSMB7		HYI-AS1		SMAD3
768										PSMC3		IGKV2OR2-1		SMARCD2
769										PTCH1		IPO13		SMG9
770										PTGES3P4		KANSL1-AS1		SMOX
771										PTGIS		KIF18A		SNORA70
772										PTPMT1		KIF21B		SNRPD2
773										PTPRJ		KLF10		SOCS2
774										PURA		KLHL20		SORL1
775										QARS1		KLHL21		SOX8
776										QRICH1		KRT18P50		SPACA4
777										RABGAP1		KRT8P21		SPAG7
778										RAD9B		KRT8P26		SPARC
779										RALGPS1		LIMA1		SPATC1
780										RAPSN		LINC00374		SPDYE3
781										RARRES1		LINC00925		SPG11
782										RASGRP1		LINC00966		SPHK2
783										RBM26		LRRC37A		SPI1
784										RBM46		LRRC37A2		SPNS2
785										RBM6		LRRC37A4P		SQSTM1
786										RCC1L		MAK16		SREBF2
787										RCN1		MANBA		SSRP1
788										RCOR1		MAPT-AS1		STAG3
789										RFC5		MARK3		STAG3L5P
790										RHOA-IT1		MC1R		STAG3L5P-PVRIG2P-PILRB
791										RILPL1		MED18		STAP1
792										RN7SKP30		MED27		STK19
793										RN7SL177P		MED8		STK19P
794										RN7SL618P		METTL15		STMN4
795										RN7SL693P		MFAP1		STRADA
796										RNA5SP187		MFAP3		STX3
797										RNA5SP233		MIEF1		STYX
798										RNA5SP459		MIR4697		SULT2B1
799										RNF10		MIR9-3		SUPT4H1
800										RNF103		MPL		SYTL2
801										RNF103-CHMP3		MROH3P		TAF6
802										RNF123		MRPL33		TANC2
803										RNF34		MTND5P15		TAP1
804										RNU2-62P		NDUFAF7		TAP2
805										RNU4-14P		NFU1P2		TAPBP
806										RNU4-68P		NME5		TAPSAR1
807										RNU4-69P		NMRAL1		TAS2R41
808										RNU4-74P		NPM1P46		TAS2R60
809										RNU5E-10P		NRBP2		TAS2R62P
810										RNU6-1029P		NSF		TBC1D4
811										RNU6-107P		NSFP1		TCF4
812										RNU6-1082P		NSUN6		TCL1A
813										RNU6-1204P		OASL		TCN1
814										RNU6-1316P		OLA1		TEX101
815										RNU6-283P		OPRD1		TEX14
816										RNU6-375P		PABPC1P7		TFR2
817										RNU6-471P		PACSIN3		THSD7A
818										RNU6-502P		PCDH17		TIMD4
819										RNU6-930P		PCDHA11		TINF2
820										RNU6ATAC16P		PCDHA12		TMEM106B
821										RNU7-153P		PCDHA13		TMEM249
822										RNU7-160P		PCDHAC1		TMEM259
823										RNU7-26P		PCDHAC2		TNF
824										RPL10AP1		PHACTR4		TNFRSF17
825										RPL10P2		PHF13		TNFRSF4
826										RPL12P11		PHF2		TNIP1
827										RPL12P27		PLEKHM1		TNXA
828										RPL12P30		PLK2		TNXB
829										RPL12P33		POC1B		TOMM22
830										RPL12P40		POLG		TOMM40
831										RPL13P6		PPIP5K1		TP53INP2
832										RPL15P4		PQLC1		TPD52
833										RPL23AP62		PRKD3		TPM1
834										RPL32P21		PTBP2		TRABD2A
835										RPL32P7		PUF60		TRAJ32
836										RPL6P25		QPCT		TRAPPC6A
837										RPL7AP66		RAB42		TRAT1
838										RPLP2P1		RALGPS1		TRAV10
839										RPRD1B		RAP2CP1		TRAV12-1
840										RPS27P22		RBKS		TRAV12-2
841										RPS28P1		RBMS3		TRAV12-3
842										RPS29P33		RLBP1		TRAV16
843										RPS2P5		RN7SKP270		TRAV17
844										RPS3AP22		RN7SL167P		TRAV2
845										RPSAP2		RN7SL309P		TRAV20
846										RPSAP5		RNA5SP272		TRAV21
847										RPSAP76		RNA5SP30		TRAV22
848										RSL24D1P1		RNA5SP67		TRAV23DV6
849										RXFP2		RNASEH2C		TRAV25
850										RYBP		RNF122		TRAV26-1
851										SAMD3		RNF38		TRAV26-2
852										SCN4B		RNU6-1001P		TRAV29DV5
853										SCRN3		RNU6-1029P		TRAV3
854										SELENOH		RNU6-849P		TRAV35
855										SEMA3G		RNU6-939P		TRAV36DV7
856										SETBP1-DT		RNU7-131P		TRAV38-1
857										SFMBT1		RNU7-147P		TRAV38-2DV8
858										SFXN2		RNU7-160P		TRAV41
859										SGO1-AS1		RNY4P29		TRAV5
860										SHISA5		RP11-104N10.1		TRAV8-1
861										SHOX2		RP11-105N13.4		TRAV8-3
862										SLC12A5		RP11-115D19.1		TRAV8-4
863										SLC25A17		RP11-115H18.1		TRAV9-2
864										SLC25A20		RP11-148E17.1		TRBV10-1
865										SLC25A6P2		RP11-14I17.2		TRBV11-1
866										SLC26A7		RP11-154H12.2		TRBV19
867										SLC29A3		RP11-154H12.3		TRBV2
868										SLC32A1		RP11-160H22.5		TRBV20-1
869										SLC39A13		RP11-165J3.5		TRBV24-1
870										SLC43A1		RP11-168O16.1		TRBV25-1
871										SLC66A1L		RP11-168O16.2		TRBV28
872										SLIT1		RP11-173P15.7		TRBV29-1
873										SMIM15P2		RP11-182J1.13		TRBV30
874										SMIM4		RP11-182J1.14		TRBV4-1
875										SNORC		RP11-182J1.16		TRBV4-2
876										SNORD118		RP11-209D14.2		TRBV5-1
877										SNRPGP2		RP11-216N14.5		TRBV5-4
878										SNX29		RP11-22P4.1		TRBV5-6
879										SOGA1		RP11-22P4.2		TRBV6-1
880										SORCS3-AS1		RP11-238I10.1		TRBV6-5
881										SPCS1		RP11-242F24.1		TRBV6-6
882										SPI1		RP11-258J10.1		TRBV7-3
883										SRA1		RP11-259G18.1		TRBV7-8
884										SRD5A3		RP11-259G18.2		TRBV9
885										SRD5A3-AS1		RP11-259G18.3		TRDV2
886										ST13		RP11-259P6.3		TREM1
887										STARD6		RP11-262M14.2		TREM2
888										STK24		RP11-272L13.3		TREML1
889										STRBP		RP11-275H4.1		TREML2
890										STX1A		RP11-284M14.1		TREML3P
891										SUDS3		RP11-293E1.1		TREML4
892										SYNE2		RP11-293E1.2		TREML5P
893										TBCA		RP11-2H8.3		TRIM35
894										TCF19		RP11-317N12.1		TRIM37
895										TCF4-AS1		RP11-325F22.2		TRIM4
896										TCF4-AS2		RP11-357F12.1		TRIP6
897										TCHP		RP11-406D1.2		TRPM4
898										TCTA		RP11-431M3.1		TSC22D4
899										TCTN1		RP11-442N24__B.1		TSPAN13
900										TFAMP1		RP11-444A22.1		TSPAN18
901										TGM4		RP11-458I7.1		TSPAN4
902										THSD7A		RP11-45P15.2		TSPAN9
903										TIMM10		RP11-45P15.4		TSPO2
904										TKT		RP11-461O14.3		TSSC4
905										TLR4		RP11-469A15.2		TXNDC5
906										TMA7		RP11-469N6.2		U3
907										TMCO5A		RP11-47P18.1		UBE2J1
908										TMCO6		RP11-47P18.2		UBE2L6
909										TMEM107		RP11-481N16.1		UBE2Z
910										TMEM161B-DT		RP1-149C7.1		UBE4A
911										TMEM165		RP11-515C16.7		UFSP1
912										TMEM200A		RP11-548L20.1		UGGT1
913										TMEM270		RP11-554L12.1		UNC5CL
914										TMEM33		RP11-554L12.2		USP3
915										TMEM89		RP11-600F24.1		USP6
916										TMPRSS5		RP11-669E14.4		USP6NL
917										TNFRSF13C		RP11-677M14.7		VARS2
918										TNKS1BP1		RP11-67M1.1		VASP
919										TOB2P1		RP11-69I13.1		VN1R104P
920										TOX		RP11-6B4.1		VPREB3
921										TPTE2P2		RP11-707O23.5		VPS28
922										TPTE2P3		RP11-713P17.3		VPS52
923										TREX1		RP11-713P17.4		VSIG10L
924										TRHDE-AS1		RP11-713P17.5		VWA7
925										TRIAP1		RP11-724N1.1		VWDE
926										TRIM64EP		RP11-734K2.4		WDR18
927										TSHZ2		RP11-770G2.2		WDR33
928										TSKU		RP11-798G7.7		WNT7A
929										TUBAP12		RP11-79E3.2		XBP1
930										UBE2D2		RP11-79E3.3		XPO5
931										UBE4A		RP11-7M10.2		XPR1
932										UBQLN1P1		RP11-894P9.2		XRCC6
933										UCN2		RP11-960H2.2		XXbac-BPG154L12.4
934										UGGT2		RP11-995C19.2		XXbac-BPG181B23.7
935										UNC119B		RP1-273G13.1		XXbac-BPG248L24.12
936										UQCRC1		RP1-273G13.2		XXbac-BPG254F23.6
937										USP19		RP1-273G13.3		XXbac-BPG254F23.7
938										USP3-AS1		RP1-84O15.2		YOD1
939										USP4		RP4-598G3.1		Y_R
940										VAMP2		RP4-660H19.1		ZAN
941										VARS2		RP6-114E22.1		ZBTB12
942										VAX1		RPL13		ZBTB22
943										VDAC2		RPL30P1		ZBTB9
944										VEPH1		RPL7AP25		ZCWPW1
945										VN1R11P		RPL7P9		ZFP3
946										VN1R13P		RPS26P8		ZKSCAN1
947										VPS29		SCARA3		ZKSCAN5
948										VSIG10		SCRIB		ZNF112
949										VTRNA1-1		SDHAF1		ZNF155
950										VTRNA1-2		SERF2		ZNF180
951										VTRNA1-3		SERINC4		ZNF222
952										VWA7		SHANK3		ZNF223
953										VWC2L		SLC39A1		ZNF224
954										VWDE		SLC6A9		ZNF226
955										WASF5P		SLC9B2		ZNF227
956										WBP1L		SLC9C2		ZNF229
957										WBP2NL		SMARCD1		ZNF230
958										WDR38		SNCA		ZNF232
959										WDR55		SNHG3		ZNF233
960										WDR6		SNORA70		ZNF234
961										WDR82		snoU13		ZNF235
962										XPNPEP3		SPATA2L		ZNF284
963										XRCC6		SPATA33		ZNF285
964										YPEL4		SPECC1		ZNF296
965										ZBTB12		SPG7		ZNF3
966										ZBTB20		SPIRE2		ZNF365
967										ZBTB34		SPPL2C		ZNF404
968										ZDHHC20P2		SPPL3		ZNF444P1
969										ZFYVE21		ST3GAL3		ZNF45
970										ZKSCAN7-AS1		STH		ZNF575
971										ZKSCAN8P1		STRC		ZNF652
972										ZKSCAN8P2		STRN		ZNF672
973										ZMYND8		SUCLA2P2		ZNF707
974										ZNF197-AS1		SUFU		ZNF789
975										ZNF204P		SZT2		ZSCAN21
976										ZNF317		TAF12		ZYX
977										ZNF391		TBC1D15		snoU13
978										ZNF408		TBL1XR1		snoZ6
979										ZNF502		TCF25
980										ZNF574		TCTN1		ADAMTS4
981										ZNF589		THAP3		ALPK2
982										ZNF602P		TIE1		APOA2
983										ZNF603P		TMEM110		ARHGEF35
984										ZNF852		TMEM131		B4GALT3
985										ZSCAN12P1		TMEM161B		BCKDK
986										ZSCAN16-AS1		TRNAU1AP		C16orf93
987												TRPM6		FCER1G
988												TSPAN16		FGF22
989												TUBB3		GPR17
990												UBE2D2		HESX1
991												UBE2D3		HSD3B7
992												WDR62		INCA1
993												WDR82		IRF2BP1
994												WNT3		ITGAX
995												Y_RNA		KAT8
996												YTHDF2		NDUFS2
997												YWHAE		OR2A7
998												ZBTB48		PPOX
999												ZNF276		PRSS36
1000												ZNF281		PRSS53
1001												ZNF365		PRSS8
1002												AGBL4		RNF40
1003												ARF5		SIGLECL1
1004												ARHGAP44		STX1B
1005												BAI3		STX4
1006												CA7		ZNF225
1007												CCDC79		ZNF646
1008												CCDC92		ZNF668
1009												CDH16
1010												CSDE1
1011												DNAH10
1012												DNMT3A
1013												DTNB
1014												DYNC1LI2
1015												ELAC2
1016												ELAVL4
1017												FOXN2
1018												LPCAT4
1019												LRRC4
1020												MYT1L
1021												NAE1
1022												PAX4
1023												PPP1R21
1024												PPP1R26
1025												SIKE1
1026												SND1
1027												STON1-GTF2A1L
1028												SYCP1
1029												TSPAN2
1030												ZNF664

## Sheet: Jaccard similarities
	IQ	ASD	TS	SZes	ADHD	BIP	MDD	Neuroticism	ANO	PanicDisorder	SZgw	OCD	Epilepsy	AD	PD
IQ	1	0.0306258	0.0285714	0.00713012	0.0126812	0.0495979	0.0857756	0.0916988	0.0817052	0	0.0869868	0.0016835	0.00911458	0.0151615	0.0206677
ASD	0.0306258	1	0.00705882	0.0224719	0.0037594	0.0186722	0.0148883	0.0281863	0.00634921	0.00357143	0.0275081	0	0.0902935	0.00726392	0.026393
TS	0.0285714	0.00705882	1	0	0	0.0139211	0.0138289	0.0234681	0.00381679	0	0.0287648	0	0.00233645	0	0.00338983
SZes	0.00713012	0.0224719	0	1	0	0.00714286	0.00295567	0.008	0	0	0.0037843	0	0.0110701	0	0.00714286
ADHD	0.0126812	0.0037594	0	0	1	0	0.00396825	0.00321543	0	0	0.012476	0	0.00374532	0	0
BIP	0.0495979	0.0186722	0.0139211	0.00714286	0	1	0.0421585	0.0788804	0.00307692	0	0.0518092	0	0.00408163	0.00963855	0.0027933
MDD	0.0857756	0.0148883	0.0138289	0.00295567	0.00396825	0.0421585	1	0.152	0.0360976	0.00195312	0.0821697	0	0.00573301	0.0331778	0.00274725
Neuroticism	0.0916988	0.0281863	0.0234681	0.008	0.00321543	0.0788804	0.152	1	0.0135338	0.00472441	0.0774834	0	0.0447761	0.0435631	0.018732
ANO	0.0817052	0.00634921	0.00381679	0	0	0.00307692	0.0360976	0.0135338	1	0	0.00363306	0	0.00315457	0.00185014	0.00543478
PanicDisorder	0	0.00357143	0	0	0	0	0.00195312	0.00472441	0	1	0.00375587	0	0.00355872	0.00191388	0
SZgw	0.0869868	0.0275081	0.0287648	0.0037843	0.012476	0.0518092	0.0821697	0.0774834	0.00363306	0.00375587	1	0.000917431	0.0103339	0.0124316	0.00976043
OCD	0.0016835	0	0	0	0	0	0	0	0	0	0.000917431	1	0.00330033	0.00093633	0
Epilepsy	0.00911458	0.0902935	0.00233645	0.0110701	0.00374532	0.00408163	0.00573301	0.0447761	0.00315457	0.00355872	0.0103339	0.00330033	1	0.017101	0.0115274
AD	0.0151615	0.00726392	0	0	0	0.00963855	0.0331778	0.0435631	0.00185014	0.00191388	0.0124316	0.00093633	0.017101	1	0.00359712
PD	0.0206677	0.026393	0.00338983	0.00714286	0	0.0027933	0.00274725	0.018732	0.00543478	0	0.00976043	0	0.0115274	0.00359712	1

## Sheet: P_values
	IQ	ASD	TS	SZes	ADHD	BIP	MDD	Neuroticism	ANO	PanicDisorder	SZgw	OCD	Epilepsy	AD	PD
IQ	0	6.44512e-15	4.34436e-14	0.000428858	1.12724e-08	4.20991e-30	2.04517e-87	9.86336e-80	1.96938e-70	1	3.88283e-91	0.501208	0.0195404	0.00110526	3.14009e-10
ASD	6.44512e-15	0	0.0692439	1.25208e-08	0.123163	5.74344e-06	3.25375e-06	7.19746e-14	0.0565474	0.183099	5.06134e-18	1	1.64175e-48	0.0705707	4.9806e-09
TS	4.34436e-14	0.0692439	0	1	1	0.000479583	1.97155e-06	3.24379e-11	0.25777	1	1.29014e-21	1	0.61359	1	0.34798
SZes	0.000428858	1.25208e-08	1	4.79679e-115	1	0.0121839	0.0278305	4.58638e-05	1	1	0.00475045	1	0.00057006	1	0.0704615
ADHD	1.12724e-08	0.123163	1	1	8.74567e-96	1	0.00187255	0.0416525	1	1	1.5857e-15	1	0.123643	1	1
BIP	4.20991e-30	5.74344e-06	0.000479583	0.0121839	1	0	4.20566e-34	1.9662e-61	0.328867	1	3.71619e-48	1	0.361393	0.00720001	0.435686
MDD	2.04517e-87	3.25375e-06	1.97155e-06	0.0278305	0.00187255	4.20566e-34	0	2.48685e-199	6.87865e-42	0.199507	3.17005e-84	1	0.234592	3.27343e-15	0.390903
Neuroticism	9.86336e-80	7.19746e-14	3.24379e-11	4.58638e-05	0.0416525	1.9662e-61	2.48685e-199	0	4.77763e-07	0.0136532	1.02045e-75	1	1.15798e-27	9.83885e-29	1.2608e-09
ANO	1.96938e-70	0.0565474	0.25777	1	1	0.328867	6.87865e-42	4.77763e-07	4.57063e-245	1	0.0815525	1	0.320226	0.47756	0.159379
PanicDisorder	1	0.183099	1	1	1	1	0.199507	0.0136532	1	5.48369e-140	0.0105472	1	0.183785	0.205924	1
SZgw	3.88283e-91	5.06134e-18	1.29014e-21	0.00475045	1.5857e-15	3.71619e-48	3.17005e-84	1.02045e-75	0.0815525	0.0105472	0	0.740742	0.00245493	0.260837	2.45278e-05
OCD	0.501208	1	1	1	1	1	1	1	1	1	0.740742	2.43562e-205	0.270097	0.733068	1
Epilepsy	0.0195404	1.64175e-48	0.61359	0.00057006	0.123643	0.361393	0.234592	1.15798e-27	0.320226	0.183785	0.00245493	0.270097	0	5.82623e-08	0.00235144
AD	0.00110526	0.0705707	1	1	1	0.00720001	3.27343e-15	9.83885e-29	0.47756	0.205924	0.260837	0.733068	5.82623e-08	0	0.198124
PD	3.14009e-10	4.9806e-09	0.34798	0.0704615	1	0.435686	0.390903	1.2608e-09	0.159379	1	2.45278e-05	1	0.00235144	0.198124	0
