# Supplementary material for: Spatiotemporal Brain Transcriptomics Reveal Risk Gene Hot-Spots in Major Neuropsychiatric Disorders
Source: Research Square preprint supplement (doi:10.21203/rs.3.rs-7667905/v1), 2025-10-08
Supplement: Supplementary file 10 [file Supplemental Table 6. Data supporting Fig. S3a, Enrichment of 15 traits risk gene set in AHBA.xlsx]

## Sheet: r_rank_biserial
	IQ	ASD	TS	Neuroticism	ADHD	OCD	ANO	PanicDisorder	BIP	MDD	SZes	SZgw	Epilepsy	AD	PD
X10	0.221194	0.363327	0.132514	0.13126	0.397042	0.0157831	0.198678	0.202368	0.112121	0.117841	0.217113	0.184247	0.222518	0.0887446	0.285281
X12	0.214153	0.332231	0.117506	0.118479	0.402521	-0.00863659	0.189163	0.22082	0.0962571	0.106405	0.234609	0.176467	0.198515	0.0922706	0.286958
X3	0.205647	0.363297	0.129261	0.117683	0.393902	-0.0180686	0.179049	0.236827	0.100823	0.113964	0.24328	0.182118	0.195116	0.0770982	0.280838
X4	0.200877	0.333446	0.119357	0.102169	0.362452	-0.0431024	0.157857	0.22598	0.0902463	0.0969205	0.222385	0.17297	0.171426	0.089038	0.283006
X6	0.206474	0.336883	0.128366	0.111821	0.389484	-0.0171604	0.18077	0.251657	0.0904961	0.11108	0.235948	0.17891	0.182184	0.0819179	0.294479
X7	0.211408	0.330652	0.128768	0.119212	0.398041	-0.0126679	0.196647	0.213388	0.096864	0.107385	0.230642	0.17814	0.18691	0.0837158	0.285499
8Co	0.207703	0.347392	0.114107	0.117534	0.34552	-0.00249694	0.184602	0.242321	0.0924274	0.105824	0.248063	0.180607	0.200371	0.0998549	0.308128
8Ve	0.210747	0.357131	0.105515	0.115222	0.383443	0.00939574	0.184693	0.24463	0.0929647	0.114355	0.229592	0.185402	0.19872	0.0934711	0.290045
AHA	0.208539	0.367351	0.104583	0.122623	0.381899	0.0281147	0.194785	0.262899	0.110907	0.125048	0.249303	0.184975	0.197171	0.0743004	0.291635
AOrG	0.253803	0.435058	0.128797	0.14171	0.488298	0.00868089	0.243162	0.264316	0.137398	0.13743	0.310307	0.231121	0.210752	0.0729758	0.299954
ARH	0.211983	0.33296	0.0921115	0.124039	0.421236	0.0138701	0.248183	0.249463	0.10334	0.116946	0.200995	0.185493	0.162387	0.0867157	0.264013
ATZ	0.227151	0.42276	0.129002	0.135162	0.407552	0.0045549	0.209343	0.264014	0.129552	0.12835	0.297159	0.208902	0.217938	0.0689763	0.289711
Acb	0.226613	0.410391	0.10402	0.129613	0.458188	0.0322568	0.211759	0.252459	0.122983	0.129575	0.270409	0.212361	0.189593	0.070358	0.261735
AnG.i	0.250633	0.439882	0.126204	0.137537	0.482938	-0.00084171	0.242518	0.268855	0.137227	0.134278	0.319353	0.229819	0.215877	0.0763707	0.295235
AnG.s	0.25216	0.440394	0.126867	0.138562	0.490944	-0.00533217	0.237393	0.266928	0.13969	0.135472	0.322836	0.230159	0.21762	0.0733164	0.294356
Arc	0.214956	0.348761	0.127035	0.120968	0.358273	-0.00340309	0.185788	0.221666	0.0930442	0.107378	0.199051	0.18785	0.223275	0.102234	0.317358
BCd	0.225607	0.398991	0.105365	0.122955	0.449432	0.023737	0.188282	0.239815	0.125526	0.124524	0.270793	0.215387	0.190006	0.0812843	0.252736
BLA	0.232371	0.41811	0.116056	0.128713	0.426079	0.0135197	0.213645	0.254942	0.128532	0.122827	0.287986	0.21533	0.221002	0.0801719	0.285358
BMA	0.233195	0.426707	0.116903	0.132416	0.426675	0.00957697	0.215554	0.263081	0.128642	0.126135	0.291005	0.2165	0.222841	0.0766213	0.290977
BST	0.235932	0.419692	0.117265	0.134592	0.470236	0.0295434	0.223557	0.271127	0.117908	0.134734	0.292622	0.214189	0.195488	0.0727245	0.279334
CA1	0.244521	0.429314	0.136592	0.130276	0.421826	-0.0433743	0.202703	0.238556	0.139912	0.122902	0.322278	0.217148	0.228913	0.0679034	0.284869
CA2	0.244151	0.434626	0.14352	0.119709	0.381166	-0.0449288	0.202247	0.20951	0.137448	0.11536	0.334845	0.215816	0.228465	0.0593318	0.286757
CA3	0.239608	0.436225	0.135944	0.122564	0.406643	-0.020054	0.209536	0.23256	0.137589	0.116798	0.334486	0.212827	0.231251	0.0662417	0.287036
CA4	0.233554	0.434286	0.13465	0.127759	0.421667	0.005159	0.205938	0.258893	0.130907	0.123122	0.318468	0.212358	0.23365	0.0727846	0.29037
CGMB	0.220859	0.387832	0.113528	0.134709	0.417113	0.0289242	0.195211	0.25438	0.107168	0.127544	0.24758	0.190435	0.197958	0.0736054	0.289185
CGPo	0.209376	0.341089	0.100211	0.124935	0.394067	0.0316064	0.20365	0.224779	0.0969256	0.117344	0.206222	0.185665	0.190472	0.1018	0.294064
CGS	0.185065	0.334316	0.101078	0.115495	0.416392	0.00855604	0.184301	0.144596	0.0937647	0.109149	0.202753	0.15883	0.173025	0.084831	0.258111
CMRt	0.217411	0.358213	0.103403	0.120736	0.399699	0.00908966	0.188695	0.242854	0.0978749	0.115047	0.24629	0.187095	0.219883	0.0878634	0.286249
COMA	0.231418	0.422251	0.116262	0.131384	0.438303	0.0150964	0.216178	0.27407	0.125025	0.125821	0.276286	0.209241	0.216013	0.0788037	0.28548
CPLV	0.157056	0.226484	0.0994303	0.109736	0.262844	-0.102937	0.18188	0.158347	0.0613709	0.0929914	0.150762	0.122168	0.0767861	0.0999538	0.226275
CeA	0.23346	0.423378	0.108395	0.137252	0.439802	0.0212723	0.223336	0.2525	0.122101	0.129111	0.288036	0.213178	0.205393	0.0669327	0.278663
CgGf.i	0.2433	0.422844	0.122273	0.136521	0.469492	0.0178722	0.239117	0.260538	0.134084	0.133402	0.290525	0.22519	0.209345	0.08147	0.296644
CgGf.s	0.246824	0.429555	0.121858	0.137228	0.475278	0.0092417	0.242001	0.255579	0.137019	0.134075	0.301234	0.227839	0.213338	0.0774326	0.298304
CgGp.i	0.248559	0.440078	0.131727	0.137797	0.48836	0.00775058	0.229784	0.264173	0.138565	0.135576	0.320792	0.22994	0.216414	0.0714927	0.295156
CgGp.s	0.248335	0.438969	0.128405	0.138111	0.483034	0.00427702	0.235258	0.260768	0.140115	0.13469	0.318116	0.229012	0.217548	0.0726978	0.297503
CgGr.i	0.244602	0.42316	0.117319	0.132808	0.483994	-0.000777273	0.244949	0.256715	0.133526	0.131028	0.29379	0.226888	0.209782	0.0810064	0.295208
CgGr.s	0.244118	0.420484	0.121545	0.131495	0.461515	0.00214455	0.229835	0.242188	0.137998	0.132861	0.300175	0.225968	0.216497	0.0828089	0.292447
Cl	0.239095	0.430789	0.140397	0.138508	0.455326	-0.0148669	0.209485	0.23518	0.125162	0.134336	0.309603	0.219457	0.225076	0.0696724	0.294693
CnF	0.222125	0.373597	0.116659	0.129919	0.397382	0.017535	0.208775	0.242692	0.102144	0.12528	0.250699	0.191193	0.195531	0.0826691	0.290582
Cu	0.211767	0.352796	0.10289	0.116179	0.379281	0.00926485	0.180474	0.244682	0.0915866	0.112189	0.241544	0.186219	0.212373	0.0982704	0.285462
Cun.pest	0.258369	0.44438	0.130578	0.13748	0.496911	0.00885004	0.249328	0.272913	0.137812	0.139405	0.327669	0.235529	0.206939	0.071885	0.293679
Cun.str	0.255609	0.439037	0.13091	0.135506	0.484641	0.011351	0.248018	0.271675	0.143337	0.138307	0.335396	0.232683	0.205105	0.0761211	0.292092
DBh	0.222824	0.388713	0.111692	0.132167	0.410527	0.0307204	0.201502	0.26298	0.108764	0.127611	0.244978	0.201443	0.206825	0.0855397	0.294611
DBv	0.230224	0.39403	0.121156	0.123855	0.420196	0.0179417	0.20955	0.238183	0.11479	0.128125	0.240522	0.20564	0.203039	0.0796876	0.286624
DG	0.246035	0.449675	0.130646	0.119987	0.347042	-0.0324824	0.237406	0.198438	0.150149	0.123754	0.371228	0.217034	0.212916	0.0488677	0.275665
DMH	0.225844	0.393232	0.120759	0.135	0.425965	0.0403538	0.222722	0.28171	0.11019	0.133567	0.252631	0.199977	0.182766	0.0733278	0.288002
DTA	0.221112	0.397574	0.106427	0.127802	0.433403	0.0107872	0.203249	0.224946	0.116674	0.122959	0.278679	0.197831	0.205632	0.0878108	0.293731
DTLd	0.226756	0.390524	0.106586	0.129682	0.456206	0.0165603	0.225574	0.211889	0.111828	0.130256	0.272575	0.2061	0.196077	0.0904154	0.302268
DTLv	0.224705	0.38058	0.102288	0.127968	0.442681	-0.00347155	0.224285	0.222146	0.109595	0.124982	0.269063	0.20198	0.192817	0.0864213	0.288517
DTM	0.222734	0.396065	0.109419	0.132149	0.446656	0.00652023	0.211562	0.228515	0.116268	0.129337	0.264387	0.200966	0.204275	0.0844932	0.297514
DTP	0.222411	0.391544	0.109032	0.134409	0.465257	-0.00316749	0.216978	0.221904	0.111837	0.131428	0.267456	0.201667	0.198697	0.0788316	0.307474
Dk	0.218304	0.364175	0.115503	0.123574	0.438814	0.0276254	0.1993	0.274531	0.101752	0.122003	0.231669	0.186997	0.188187	0.0881604	0.284953
Dt	0.206634	0.34978	0.115058	0.109876	0.352118	0.00346954	0.181614	0.239846	0.0936962	0.107146	0.245321	0.182843	0.169681	0.0974825	0.302785
EW	0.203469	0.356112	0.107399	0.115747	0.399517	-0.00971793	0.182621	0.21735	0.106315	0.114415	0.236232	0.178319	0.191469	0.0830681	0.278742
Emb	0.20548	0.328194	0.0852539	0.108175	0.372127	0.0143332	0.170686	0.248176	0.0979853	0.103807	0.226557	0.180104	0.180549	0.103468	0.282777
FP.s	0.249803	0.438401	0.124763	0.140256	0.490234	-0.0054691	0.237251	0.277331	0.136873	0.132739	0.308475	0.227614	0.216583	0.0763797	0.292498
FPi	0.242444	0.408838	0.108126	0.132214	0.4706	-0.00740222	0.249909	0.247575	0.131768	0.126472	0.283954	0.222077	0.211205	0.0917273	0.286972
FPm	0.249271	0.430864	0.115629	0.136728	0.489201	-0.00094038	0.265502	0.281996	0.141877	0.13054	0.321381	0.226641	0.219025	0.0839921	0.291854
Fas	0.206564	0.347921	0.103381	0.117733	0.348881	0.0079741	0.172848	0.25813	0.0989327	0.108775	0.23784	0.184419	0.184383	0.0878606	0.285923
FuG.cos	0.24921	0.435381	0.126504	0.14052	0.484545	0.00915813	0.243401	0.265753	0.136335	0.133837	0.30291	0.229702	0.21168	0.0737346	0.297166
FuG.its	0.249602	0.432858	0.125377	0.139141	0.48296	0.000449046	0.244455	0.267296	0.136617	0.134853	0.303746	0.229389	0.213346	0.0752372	0.297799
FuG.l	0.248035	0.435681	0.129028	0.140234	0.478895	0.000392664	0.238423	0.265424	0.139526	0.132652	0.303428	0.227941	0.215125	0.0742716	0.296529
GPe	0.206745	0.345229	0.0988829	0.119493	0.412139	0.0105556	0.185827	0.245949	0.0976615	0.119734	0.234285	0.194469	0.172291	0.0913733	0.274833
GPi	0.205875	0.34024	0.0972351	0.119525	0.412616	0.0124746	0.185393	0.246241	0.0948955	0.12054	0.240457	0.186816	0.166048	0.0939515	0.275952
GRe	0.24987	0.433979	0.123163	0.14033	0.486248	-4.13e-05	0.24354	0.266627	0.137904	0.133189	0.303253	0.22838	0.21202	0.0753052	0.295846
GiRt	0.219796	0.35533	0.109456	0.12002	0.396888	-0.000710822	0.196281	0.236436	0.0955861	0.118529	0.242233	0.189458	0.204117	0.0846561	0.29587
Glo	0.204277	0.348337	0.112862	0.113188	0.358432	0.00656655	0.171693	0.237054	0.0961891	0.109687	0.239002	0.182541	0.179595	0.0900687	0.288851
Gr	0.209785	0.343297	0.0863826	0.117138	0.394771	0.00897891	0.175276	0.2458	0.0948588	0.110255	0.231596	0.178736	0.209536	0.102629	0.283774
HCd	0.226933	0.406732	0.105119	0.127723	0.467409	0.0286202	0.19109	0.231908	0.125162	0.125921	0.270627	0.216354	0.185606	0.0759663	0.254744
HG	0.252263	0.442417	0.128894	0.138725	0.48668	0.00785529	0.232642	0.273819	0.13644	0.136059	0.317754	0.22951	0.213641	0.0728581	0.294497
He.Crus.I	0.233291	0.404629	0.125732	0.124243	0.26181	0.00867082	0.218941	0.20257	0.134873	0.122681	0.313673	0.210771	0.15629	0.0852544	0.272643
He.Crus.II	0.23415	0.404542	0.123643	0.123715	0.251578	0.00956288	0.225874	0.199948	0.13529	0.122543	0.312666	0.211852	0.152496	0.0875272	0.267558
He.III	0.228737	0.397439	0.143839	0.124303	0.248126	0.0167778	0.220874	0.186548	0.134848	0.120491	0.319536	0.206431	0.148117	0.0837192	0.278232
He.IV	0.230975	0.393995	0.134612	0.12513	0.270162	0.0345383	0.219651	0.19683	0.125263	0.123922	0.316464	0.209619	0.147907	0.0801087	0.285193
He.IX	0.23227	0.411059	0.133964	0.128245	0.255888	0.0329979	0.222676	0.187719	0.127676	0.132304	0.328417	0.214126	0.141911	0.0783189	0.281117
He.V	0.232785	0.408819	0.138758	0.126099	0.275562	0.0302754	0.223413	0.200561	0.130777	0.124884	0.329541	0.212646	0.147939	0.0760675	0.281961
He.VI	0.230942	0.405089	0.128602	0.123872	0.260703	0.0167305	0.219165	0.202118	0.134787	0.120739	0.317299	0.209948	0.155956	0.0839556	0.27275
He.VIIB	0.232055	0.405824	0.127683	0.123923	0.249563	0.011945	0.218606	0.197128	0.135908	0.123153	0.31609	0.211069	0.151572	0.0835425	0.271001
He.VIIIA	0.23338	0.406148	0.129546	0.123213	0.252566	0.0135278	0.222013	0.194809	0.134678	0.124493	0.319761	0.212425	0.147974	0.0833496	0.269713
He.VIIIB	0.230246	0.402722	0.135029	0.12136	0.216415	0.0114134	0.214143	0.184288	0.133555	0.124249	0.32646	0.205348	0.141001	0.0761892	0.274261
He.X	0.228652	0.3886	0.13311	0.125736	0.276669	0.00718474	0.223542	0.205753	0.119871	0.121801	0.29317	0.205331	0.152847	0.0768675	0.285888
Hl	0.21776	0.372207	0.121768	0.136083	0.411075	0.0275992	0.179942	0.255738	0.104357	0.124061	0.271263	0.186092	0.186744	0.0914919	0.288441
Hm	0.20817	0.379993	0.111146	0.136404	0.33794	0.0252755	0.184449	0.290338	0.106501	0.120858	0.265692	0.184984	0.156507	0.0803234	0.287448
IC	0.226729	0.383889	0.10853	0.127781	0.414365	0.0196674	0.196647	0.267065	0.106559	0.125297	0.27976	0.198236	0.189258	0.0856584	0.287619
ICjl	0.206219	0.342674	0.113787	0.110158	0.368215	-0.0224664	0.171977	0.266296	0.0955774	0.108172	0.246548	0.178362	0.175841	0.0893892	0.27806
ILc	0.221524	0.385345	0.0989142	0.131947	0.491563	0.00581948	0.210555	0.223034	0.102241	0.126876	0.254431	0.197942	0.202773	0.0830265	0.295692
ILr	0.221475	0.387789	0.106637	0.129756	0.452141	-0.00919035	0.21696	0.203515	0.107945	0.126052	0.259364	0.199246	0.19912	0.0820869	0.307435
IO	0.223142	0.359116	0.128183	0.11459	0.432784	0.0426675	0.182834	0.215973	0.106165	0.113195	0.266205	0.186978	0.203574	0.098891	0.285503
IOG.i	0.251156	0.43008	0.122026	0.134148	0.492687	0.0122129	0.247123	0.264985	0.13336	0.136174	0.314043	0.231872	0.207363	0.0802756	0.293892
IOG.s	0.251769	0.435595	0.122996	0.134956	0.487957	0.00610743	0.245325	0.265888	0.1353	0.136803	0.322148	0.23102	0.211627	0.0770103	0.294844
IRoG	0.249901	0.431412	0.118567	0.13997	0.486424	0.0070458	0.247899	0.269014	0.135532	0.135614	0.301692	0.227198	0.212008	0.0768706	0.293861
ITG.its	0.250482	0.438095	0.124729	0.139198	0.485828	0.00404544	0.242934	0.266129	0.137523	0.135484	0.309563	0.230949	0.21332	0.0732689	0.298295
ITG.l	0.247219	0.433143	0.127764	0.139702	0.482989	-0.000173175	0.233831	0.263729	0.13807	0.132368	0.306525	0.226384	0.215122	0.0741207	0.295541
ITG.mts	0.247562	0.439447	0.128489	0.139951	0.48417	0.00792174	0.232378	0.26527	0.134668	0.133798	0.311164	0.228041	0.21578	0.0721802	0.295051
LA	0.238493	0.432048	0.123835	0.131215	0.432444	0.0152434	0.220095	0.260272	0.128127	0.128708	0.303026	0.217739	0.22242	0.0745914	0.291348
LC	0.221299	0.357892	0.132011	0.124633	0.368414	-0.00783918	0.207218	0.194921	0.115711	0.122422	0.239887	0.183371	0.184796	0.0717446	0.292539
LGd	0.225346	0.399573	0.116636	0.118301	0.39648	-0.0419184	0.218933	0.222008	0.115694	0.116917	0.298446	0.198233	0.202741	0.0880887	0.297464
LHA	0.21617	0.383327	0.107773	0.123218	0.411793	0.0160056	0.207289	0.269401	0.102832	0.13071	0.243283	0.195104	0.198139	0.071691	0.285522
LHM	0.213641	0.371653	0.106067	0.125902	0.433767	0.012817	0.201693	0.299997	0.0991072	0.126061	0.237509	0.189957	0.188983	0.0717148	0.284042
LHT	0.22767	0.392774	0.117192	0.130674	0.437247	0.0408229	0.216317	0.276992	0.0978855	0.133723	0.258756	0.201678	0.192874	0.0718182	0.291441
LIG	0.249872	0.436414	0.124298	0.139028	0.480445	0.00934339	0.244088	0.264685	0.137921	0.134009	0.304176	0.228719	0.211068	0.0755884	0.297959
LM	0.209506	0.335192	0.0997824	0.129733	0.364002	0.0305553	0.241872	0.293493	0.104988	0.119608	0.232683	0.176391	0.174701	0.0779797	0.2848
LMRt	0.211252	0.349919	0.116042	0.120978	0.384391	-0.00958301	0.184887	0.253017	0.0912802	0.113514	0.231832	0.18852	0.212568	0.0934274	0.304335
LOrG	0.249634	0.434172	0.124028	0.138656	0.484476	0.00174786	0.234317	0.265566	0.137139	0.134452	0.315293	0.228689	0.212777	0.074696	0.296922
LPB	0.209581	0.368088	0.0946138	0.123051	0.416324	0.0283121	0.176916	0.240614	0.108904	0.118713	0.221725	0.186348	0.189008	0.0861743	0.286111
LTu	0.229146	0.385796	0.110928	0.13296	0.425392	0.0261172	0.214537	0.255125	0.11966	0.122866	0.264985	0.201146	0.199401	0.0821682	0.283975
LiG.pest	0.252888	0.443268	0.130314	0.136915	0.492687	0.00512678	0.237308	0.268158	0.138709	0.137584	0.335757	0.233069	0.211734	0.0730155	0.292091
LiG.str	0.254748	0.447327	0.13347	0.135362	0.485453	0.0199513	0.243194	0.274417	0.139955	0.139107	0.338287	0.233479	0.206758	0.0741738	0.292604
MB	0.195725	0.33203	0.085153	0.11648	0.335379	-0.00672965	0.205427	0.246257	0.107136	0.110152	0.221856	0.18116	0.192568	0.0985611	0.265264
MBRF	0.21395	0.384684	0.125428	0.128478	0.399165	0.0248365	0.168302	0.247077	0.10666	0.125146	0.256379	0.183554	0.194671	0.0534969	0.284917
MBRa	0.221138	0.364183	0.109607	0.122369	0.41168	0.0244317	0.200588	0.221862	0.106154	0.12036	0.234095	0.182038	0.188501	0.0772642	0.295081
MFG.i	0.249788	0.431927	0.121486	0.138703	0.48526	-0.0063229	0.239663	0.26622	0.140695	0.132839	0.30855	0.228124	0.215232	0.0774028	0.290807
MFG.s	0.25036	0.433899	0.12496	0.139868	0.485811	-0.00270636	0.236155	0.267508	0.137722	0.13382	0.308927	0.228143	0.217284	0.074061	0.292937
MG	0.22393	0.389345	0.109519	0.131383	0.438888	-0.00721897	0.218893	0.233751	0.114652	0.131108	0.2799	0.203523	0.193706	0.0824067	0.300755
MM	0.213236	0.356477	0.114068	0.134878	0.342437	0.0141661	0.206867	0.264784	0.107755	0.12495	0.278791	0.192111	0.180513	0.0758484	0.29215
MOrG	0.249766	0.43071	0.120985	0.139348	0.481036	0.00129277	0.244312	0.261768	0.13916	0.132858	0.303724	0.229347	0.210212	0.0761892	0.295
MPB	0.218546	0.369151	0.107142	0.128603	0.408182	0.0211898	0.188762	0.237869	0.111733	0.120505	0.237805	0.189713	0.198109	0.0845213	0.294076
MTG.i	0.248646	0.438717	0.126092	0.138691	0.486367	-0.000455087	0.236341	0.26351	0.137694	0.133391	0.311607	0.229156	0.215988	0.0735221	0.294277
MTG.s	0.250371	0.438774	0.125124	0.139615	0.485964	-0.000974612	0.237075	0.267014	0.13897	0.134541	0.312875	0.229202	0.215052	0.0735671	0.295272
Mo5	0.214772	0.34229	0.132661	0.118963	0.390824	-0.0011055	0.196051	0.231628	0.0973246	0.108559	0.251168	0.181605	0.185713	0.0836898	0.2852
OPi	0.259068	0.434657	0.121188	0.140932	0.490609	-0.00868794	0.263729	0.291978	0.144503	0.138517	0.320044	0.231618	0.199124	0.0753355	0.292395
OPl	0.254928	0.431493	0.125153	0.134875	0.490126	-0.0210558	0.24092	0.256152	0.157022	0.133084	0.346066	0.234105	0.207507	0.0732459	0.30034
OPs	0.254603	0.434844	0.130335	0.138601	0.502047	-0.00529693	0.253962	0.28974	0.146324	0.135544	0.324103	0.2315	0.196773	0.0810345	0.288671
OTG.i	0.252577	0.438857	0.123217	0.138242	0.489462	-0.00149212	0.242223	0.266889	0.140835	0.1355	0.317857	0.23263	0.213872	0.0731092	0.295628
OTG.s	0.25075	0.442199	0.126216	0.13773	0.486827	0.00571779	0.237302	0.262867	0.137276	0.13567	0.323431	0.233048	0.212739	0.0717527	0.296695
OlfT	0.240046	0.416996	0.111188	0.133104	0.452152	0.0128663	0.233764	0.274268	0.125631	0.134371	0.29327	0.217964	0.201499	0.0745342	0.270534
PCLa	0.250194	0.414999	0.122937	0.133033	0.480684	0.00282718	0.247906	0.260206	0.137487	0.132215	0.297701	0.227456	0.204559	0.0808532	0.295072
PCLa.i	0.24557	0.431721	0.122864	0.134005	0.477867	0.00479453	0.230866	0.263764	0.138009	0.133208	0.309036	0.22632	0.217215	0.0728827	0.295723
PCLa.s	0.244662	0.428435	0.124182	0.133187	0.472059	-0.00489722	0.223423	0.26311	0.138593	0.131274	0.308098	0.223267	0.221074	0.0717142	0.293974
PCLp.cs	0.252762	0.437511	0.13078	0.137932	0.482228	0.0127223	0.234698	0.27525	0.143476	0.13728	0.319998	0.226799	0.211842	0.0719785	0.291989
PCLp.l	0.250747	0.447634	0.142692	0.140995	0.478225	-0.0115463	0.222214	0.275505	0.137848	0.137743	0.326195	0.226747	0.223918	0.0608585	0.294931
PHA	0.217178	0.380767	0.110877	0.133169	0.436049	0.0204568	0.220918	0.302342	0.108572	0.12954	0.230542	0.192658	0.185339	0.0680065	0.279177
PHG.cos	0.245453	0.436389	0.12808	0.141524	0.478923	0.00409176	0.233886	0.266134	0.136328	0.133587	0.300792	0.225221	0.21886	0.0742118	0.294229
PHG.l	0.243744	0.430624	0.132008	0.14166	0.473762	0.0243874	0.231005	0.252947	0.131575	0.13706	0.294305	0.225927	0.209065	0.0777217	0.298351
PIN	0.225385	0.40039	0.118246	0.132734	0.423612	0.0323374	0.205142	0.268111	0.111056	0.134806	0.271056	0.201103	0.197285	0.0785325	0.310338
PLP	0.248158	0.430957	0.12323	0.13749	0.480581	0.0119148	0.244543	0.258585	0.136024	0.135526	0.304923	0.229115	0.206219	0.0761578	0.298574
PLT	0.248148	0.441543	0.130071	0.14045	0.485658	0.00949642	0.229382	0.273007	0.136331	0.136218	0.319356	0.227795	0.215615	0.0710118	0.296652
POrG	0.252365	0.427935	0.126201	0.138143	0.486901	0.00755324	0.247273	0.246571	0.134325	0.135333	0.30578	0.229933	0.208374	0.078375	0.300049
PRF	0.219719	0.365463	0.110922	0.122381	0.402243	0.00859833	0.18414	0.240705	0.0965216	0.12053	0.245741	0.192409	0.200474	0.0799968	0.29757
PTG	0.21941	0.398429	0.111904	0.130311	0.414723	-0.00460121	0.22427	0.232837	0.125854	0.118588	0.245743	0.209381	0.218168	0.0926261	0.268717
PTec	0.224526	0.391218	0.109321	0.132457	0.446749	0.0278962	0.193419	0.263335	0.107186	0.129765	0.254435	0.198682	0.188904	0.0710061	0.283797
PV.Crus.I	0.234331	0.406547	0.129144	0.125612	0.267783	0.00879366	0.22324	0.207291	0.137082	0.121653	0.311429	0.211666	0.155222	0.0857746	0.27428
PV.Crus.II	0.232025	0.403401	0.126317	0.125086	0.257909	0.0128069	0.222907	0.200379	0.135169	0.122382	0.31094	0.210409	0.15265	0.0844796	0.273526
PV.III	0.227394	0.404577	0.137963	0.129681	0.263644	0.0234491	0.20608	0.204549	0.134765	0.125046	0.319471	0.207798	0.154145	0.0752679	0.28373
PV.IV	0.232661	0.402417	0.129589	0.127094	0.270713	0.0185015	0.229107	0.200491	0.134365	0.121739	0.313361	0.211451	0.148784	0.0849994	0.278668
PV.IX	0.231453	0.398698	0.120046	0.120675	0.239638	0.00489924	0.218041	0.194527	0.130248	0.119683	0.309887	0.209028	0.155954	0.0878838	0.269571
PV.V	0.231659	0.403153	0.128648	0.122667	0.256359	0.0121202	0.228334	0.207993	0.135025	0.118815	0.312286	0.209103	0.154515	0.0872001	0.272103
PV.VI	0.231972	0.40541	0.12482	0.123905	0.256189	0.00506234	0.22473	0.203262	0.137512	0.118226	0.310893	0.209908	0.154819	0.0872886	0.271977
PV.VIIB	0.231999	0.398212	0.122733	0.123239	0.258892	0.00817848	0.22354	0.203324	0.136158	0.121435	0.307735	0.209907	0.15284	0.0891564	0.267009
PV.VIIIA	0.235047	0.403071	0.122371	0.123354	0.260828	0.00807277	0.230469	0.20422	0.134362	0.121676	0.307198	0.211488	0.151252	0.0887244	0.265024
PV.VIIIB	0.230207	0.393797	0.124672	0.122551	0.269844	0.00681322	0.218789	0.211009	0.135833	0.120868	0.299832	0.210178	0.154663	0.0882555	0.269931
PV.X	0.227558	0.382986	0.108951	0.109763	0.261833	-0.00728744	0.233803	0.222473	0.129558	0.105761	0.272026	0.204646	0.151848	0.107409	0.268176
PVH	0.206724	0.3581	0.115027	0.123485	0.396434	-0.00137936	0.220099	0.245481	0.110999	0.125457	0.206769	0.182564	0.185499	0.0837297	0.277172
Pa	0.175888	0.332652	0.098138	0.11732	0.384062	0.00242445	0.168814	0.196467	0.087164	0.110664	0.193171	0.157878	0.173574	0.0803354	0.265984
PaOG	0.243236	0.426277	0.122522	0.13732	0.469913	0.00137231	0.237878	0.247897	0.135117	0.130821	0.285689	0.225028	0.208655	0.0770846	0.289104
PalHy	0.213662	0.33945	0.0979901	0.122829	0.413031	0.0439059	0.211102	0.28586	0.0949033	0.124311	0.229209	0.186629	0.179117	0.0780351	0.288962
Pcu.i	0.252515	0.442075	0.128337	0.13827	0.494947	0.00479453	0.237461	0.268939	0.137833	0.136131	0.323112	0.23221	0.213291	0.0725476	0.293724
Pcu.s	0.250903	0.438023	0.126132	0.137332	0.489394	0.00887219	0.239065	0.26093	0.13683	0.13776	0.32508	0.231303	0.212225	0.070888	0.296699
PeF	0.219005	0.374562	0.0997288	0.130428	0.425392	0.0344739	0.21549	0.275274	0.106698	0.133499	0.249611	0.195244	0.183378	0.0753293	0.28649
Pir	0.237062	0.41903	0.13473	0.138924	0.429315	0.0146172	0.215645	0.281052	0.125707	0.135077	0.30693	0.216543	0.22181	0.0714057	0.295748
Pn	0.217318	0.356935	0.134974	0.117873	0.349483	-0.0209642	0.195306	0.212699	0.0890058	0.107435	0.218229	0.192696	0.219549	0.0916084	0.310585
PoG.cs	0.247715	0.433043	0.123191	0.13465	0.484494	0.0103905	0.23212	0.27349	0.138699	0.134882	0.31658	0.227706	0.212487	0.0769017	0.290099
PoG.il	0.248749	0.43311	0.125975	0.136447	0.481535	0.00409377	0.236753	0.270594	0.13687	0.135123	0.312404	0.227158	0.215415	0.0770046	0.293338
PoG.pcs	0.25046	0.441787	0.123425	0.137992	0.481501	0.00453879	0.239486	0.272905	0.139478	0.135293	0.320537	0.229719	0.215649	0.0735139	0.293363
PoG.sl	0.247879	0.428542	0.122733	0.135405	0.483738	-0.000539661	0.240492	0.272744	0.137376	0.135303	0.312582	0.227395	0.211067	0.078318	0.293262
Pr5	0.217444	0.376306	0.10808	0.1193	0.354724	-0.00135721	0.18029	0.266808	0.107015	0.114672	0.266739	0.185397	0.196882	0.0865932	0.305075
PrG.cs	0.247216	0.431944	0.124173	0.134115	0.479537	0.0109775	0.22586	0.268455	0.133832	0.134076	0.313548	0.2261	0.216063	0.0725149	0.2922
PrG.il	0.247193	0.429692	0.123278	0.136463	0.481092	0.00147199	0.22911	0.266533	0.138561	0.13281	0.307002	0.22645	0.216009	0.0735422	0.291817
PrG.prc	0.249483	0.42555	0.123864	0.135258	0.482449	-0.000861847	0.2333	0.265343	0.137454	0.132296	0.305559	0.227184	0.214604	0.0776404	0.294161
PrG.sl	0.245867	0.427331	0.125721	0.136081	0.478112	0.00799423	0.229273	0.261703	0.137065	0.133582	0.30626	0.225455	0.215311	0.0728311	0.294496
PrOR	0.224876	0.40142	0.119916	0.131557	0.414365	0.00299029	0.227791	0.281859	0.110088	0.13314	0.247888	0.201885	0.194106	0.0621792	0.279791
Pu	0.230657	0.405965	0.108189	0.124845	0.454474	0.0310547	0.190347	0.238026	0.124022	0.126352	0.278158	0.218391	0.185073	0.0764428	0.253076
R	0.21793	0.346585	0.0888435	0.119664	0.365302	0.00438173	0.192962	0.249819	0.100643	0.114708	0.236908	0.189233	0.177624	0.0922489	0.279715
RN	0.216018	0.350292	0.0856561	0.119264	0.406547	0.0196171	0.186654	0.264917	0.0990504	0.114321	0.244467	0.185752	0.178213	0.0887588	0.285162
RPn	0.222504	0.350544	0.109864	0.12812	0.419061	0.00746867	0.197229	0.243802	0.0887793	0.125815	0.236765	0.192181	0.199372	0.0801782	0.297573
RaM	0.217204	0.350327	0.114846	0.120935	0.391597	0.00586982	0.18475	0.240388	0.0955863	0.118077	0.22733	0.189923	0.211844	0.084841	0.298928
S	0.244107	0.433272	0.128823	0.137291	0.447536	-0.00389039	0.214568	0.243805	0.136131	0.133124	0.308008	0.220915	0.227253	0.0721172	0.291174
SC	0.225632	0.379971	0.101449	0.129147	0.427635	0.0250278	0.202042	0.276357	0.118008	0.125425	0.261666	0.198202	0.193687	0.0847871	0.288018
SCG	0.242771	0.420679	0.118528	0.136626	0.471088	0.0202957	0.247673	0.251814	0.129908	0.132941	0.273039	0.22304	0.205137	0.0853367	0.290231
SFG	0.254509	0.432741	0.124067	0.137607	0.487066	-0.00730254	0.244117	0.24443	0.139651	0.133549	0.312661	0.231825	0.206391	0.0708908	0.299521
SFG.l	0.250144	0.433396	0.124151	0.139298	0.489212	0.000932325	0.23846	0.266536	0.138541	0.134562	0.309691	0.229377	0.215497	0.0742406	0.293874
SFG.m	0.250397	0.434471	0.125882	0.139589	0.485754	0.00187472	0.237849	0.261891	0.137302	0.134564	0.307983	0.228374	0.215086	0.0739125	0.296571
SI	0.229248	0.3991	0.112832	0.126625	0.43639	0.0326112	0.213189	0.273467	0.116982	0.129712	0.252456	0.204249	0.197778	0.0748501	0.268267
SIG	0.248924	0.435033	0.125199	0.140501	0.484386	0.00684443	0.239488	0.258291	0.137854	0.135246	0.299064	0.228373	0.211246	0.0739638	0.298829
SMG.i	0.247944	0.442599	0.128398	0.138973	0.483528	-0.00774454	0.229176	0.270116	0.140241	0.13518	0.318614	0.229151	0.21609	0.0710684	0.297721
SMG.s	0.251539	0.436212	0.124426	0.138181	0.48702	0.0032581	0.239949	0.264818	0.138462	0.1374	0.317355	0.230816	0.210361	0.074549	0.297789
SNC	0.218153	0.364318	0.122891	0.125059	0.401709	-0.0276828	0.195455	0.271628	0.109314	0.114804	0.245785	0.188639	0.185466	0.087666	0.307914
SNR	0.206727	0.329156	0.0898141	0.117351	0.387917	0.00671354	0.176309	0.257854	0.0924329	0.113304	0.22017	0.181161	0.177665	0.103614	0.292078
SO	0.196599	0.339516	0.111678	0.123343	0.345111	0.000185257	0.185331	0.207581	0.110533	0.110233	0.206189	0.167651	0.183527	0.106055	0.287029
SOC	0.213792	0.351877	0.0993176	0.116392	0.391784	0.00239021	0.188158	0.259473	0.0928452	0.109976	0.255377	0.187982	0.185838	0.0902344	0.287183
SOG.i	0.253902	0.434233	0.125215	0.136392	0.485589	-0.00252312	0.244608	0.266654	0.139452	0.136057	0.315508	0.233262	0.211202	0.0788086	0.294295
SOG.s	0.25232	0.43757	0.125377	0.136976	0.488372	0.00229054	0.238271	0.265001	0.137813	0.135525	0.326697	0.231035	0.214169	0.0747793	0.294867
SPL.i	0.253397	0.438484	0.127313	0.138325	0.493317	0.00629974	0.238192	0.268855	0.137316	0.137307	0.320817	0.231468	0.212002	0.0741635	0.298308
SPL.s	0.250113	0.431407	0.125571	0.138544	0.487906	0.00728542	0.241404	0.265296	0.137723	0.137228	0.313872	0.22977	0.211397	0.075599	0.294866
SRoG	0.253168	0.432949	0.126251	0.13922	0.490966	-0.00057188	0.252785	0.259538	0.137751	0.134697	0.304144	0.230829	0.210868	0.0774472	0.300852
STG.i	0.248968	0.436301	0.124929	0.138457	0.484397	-0.0026097	0.237726	0.268693	0.137531	0.134809	0.310826	0.229244	0.214987	0.0741575	0.293866
STG.l	0.24904	0.434695	0.127639	0.138383	0.478549	0.00433138	0.238202	0.259963	0.137953	0.13402	0.314797	0.22886	0.21169	0.0743021	0.296701
Sb	0.217647	0.345871	0.0999064	0.121683	0.442091	0.0193775	0.193405	0.272853	0.101778	0.114702	0.247552	0.190923	0.182774	0.0871847	0.275797
Sp5	0.225673	0.384591	0.106471	0.124006	0.3995	0.0206541	0.195195	0.247933	0.103228	0.119252	0.261336	0.197082	0.230269	0.088246	0.285375
SptN	0.224063	0.412062	0.103661	0.130496	0.448211	0.0436521	0.206009	0.271508	0.112703	0.133682	0.26644	0.203328	0.201303	0.077069	0.279033
SuM	0.221852	0.380776	0.114437	0.136188	0.428072	0.0453517	0.238894	0.310221	0.106185	0.130991	0.25126	0.191027	0.175518	0.0680567	0.287651
SubC	0.215671	0.360217	0.110237	0.123737	0.400165	0.0116732	0.184691	0.231572	0.100878	0.117592	0.248412	0.186741	0.19951	0.0771373	0.293182
SubCn	0.216379	0.36893	0.107561	0.122257	0.407943	0.0118141	0.185199	0.258457	0.0977267	0.119247	0.246277	0.18642	0.192543	0.0808169	0.2785
TCd	0.230901	0.412004	0.11314	0.12363	0.436174	0.00859632	0.18321	0.252957	0.132064	0.119874	0.29399	0.216149	0.206051	0.0777256	0.253762
TG	0.251434	0.43801	0.127163	0.140199	0.486248	0.00917625	0.235571	0.263063	0.136988	0.138754	0.321655	0.230572	0.211153	0.0725598	0.298347
TM	0.223425	0.363225	0.106403	0.134574	0.406581	0.0210991	0.248139	0.306599	0.106714	0.129652	0.242875	0.189887	0.177107	0.0755236	0.290643
TP.i	0.248428	0.433611	0.123706	0.140126	0.486027	0.01002	0.245959	0.265345	0.138139	0.133541	0.299016	0.228659	0.213754	0.0773081	0.294767
TP.m	0.243936	0.428594	0.11756	0.141	0.473791	0.0168664	0.247362	0.266849	0.137639	0.134235	0.286552	0.226259	0.20718	0.0790372	0.296148
TP.s	0.246018	0.424855	0.118728	0.138351	0.474029	0.00766601	0.251896	0.267458	0.137632	0.13294	0.291207	0.227926	0.209162	0.0788992	0.293872
VMH	0.219718	0.382557	0.112559	0.125311	0.428248	0.0126438	0.22381	0.230868	0.108732	0.124014	0.244121	0.192155	0.18771	0.0754282	0.289574
VTA	0.219981	0.368953	0.110511	0.12627	0.425358	0.0195849	0.183268	0.26604	0.0993804	0.12161	0.250384	0.190975	0.189082	0.0827162	0.291089
Ve.I.II	0.221546	0.385217	0.130676	0.11904	0.280854	0.00991023	0.198029	0.194828	0.135145	0.117991	0.297491	0.203799	0.151369	0.0754881	0.285246
Ve.III	0.22961	0.397348	0.127068	0.119906	0.273546	0.00663703	0.215976	0.210688	0.132829	0.116294	0.300374	0.208955	0.155588	0.0827885	0.273654
Ve.IV	0.229943	0.398098	0.125857	0.11986	0.26198	0.00481668	0.220005	0.20382	0.135686	0.115934	0.301515	0.207047	0.15729	0.0831554	0.271786
Ve.IX	0.230551	0.39385	0.126586	0.119058	0.251596	0.00220294	0.22547	0.20784	0.132844	0.12112	0.300443	0.207843	0.150555	0.082441	0.269359
Ve.V	0.229395	0.396221	0.120546	0.118824	0.250806	-0.00305875	0.224565	0.202627	0.13207	0.114819	0.301731	0.208081	0.15387	0.0874371	0.267563
Ve.VI	0.225312	0.392714	0.125045	0.121014	0.253475	0.00174786	0.2088	0.206392	0.134284	0.11539	0.30106	0.203822	0.159458	0.083307	0.273256
Ve.VIIAf	0.226178	0.401243	0.130576	0.122442	0.256354	0.00169752	0.201696	0.1969	0.13325	0.118407	0.316991	0.206708	0.152765	0.0755161	0.275804
Ve.VIIAt	0.233492	0.396784	0.128669	0.12302	0.250304	0.0113168	0.22183	0.203118	0.128867	0.122048	0.30406	0.208192	0.151115	0.0824289	0.266539
Ve.VIIB	0.230358	0.398623	0.124676	0.121666	0.271003	0.00261273	0.220192	0.202436	0.136276	0.119842	0.30096	0.208646	0.155055	0.083236	0.271787
Ve.VIIIA	0.230965	0.398993	0.130577	0.120158	0.260362	0.0127364	0.226187	0.203515	0.132806	0.12002	0.305615	0.208427	0.152166	0.0823702	0.268692
Ve.VIIIB	0.229759	0.396574	0.12851	0.119236	0.268493	0.000267817	0.211533	0.20839	0.135022	0.118714	0.302586	0.206088	0.156892	0.0802339	0.269862
Ve.X	0.220999	0.375568	0.126584	0.116944	0.270344	0.000547716	0.21569	0.211101	0.123406	0.118344	0.27627	0.2008	0.151037	0.0785116	0.28091
ZI	0.218674	0.353499	0.094613	0.121286	0.403384	0.025066	0.19657	0.268899	0.0984258	0.122185	0.241557	0.192353	0.187444	0.0911014	0.282421
cc	0.203915	0.309919	0.0872069	0.112629	0.378569	0.02948	0.182497	0.169555	0.095749	0.110782	0.23598	0.184177	0.120633	0.103471	0.260311
cgb	0.215984	0.351398	0.10112	0.119952	0.38078	0.0289101	0.187616	0.210127	0.0933721	0.119987	0.274525	0.195449	0.144719	0.0752289	0.271628
fro	0.249839	0.433204	0.121685	0.139861	0.480598	-0.0018123	0.235406	0.258927	0.137564	0.133237	0.303328	0.227064	0.212954	0.0756358	0.296977
nbM	0.228427	0.370828	0.125988	0.119153	0.412826	0.0251869	0.219293	0.224531	0.105744	0.125974	0.227215	0.200193	0.189265	0.0791176	0.272116
opIFG	0.247738	0.431285	0.12129	0.137347	0.48643	0.00691894	0.238398	0.263964	0.140189	0.133994	0.306076	0.228055	0.211162	0.0773484	0.294809
orIFG	0.249729	0.432857	0.124287	0.138935	0.488599	0.0020197	0.238852	0.263747	0.139257	0.133723	0.309683	0.228646	0.213835	0.0760629	0.297055
trIFG	0.249517	0.426884	0.119961	0.13727	0.479253	-0.00851174	0.239891	0.259154	0.138585	0.13248	0.305699	0.227192	0.212405	0.0794725	0.291441

## Sheet: P_Value
	IQ	ASD	TS	Neuroticism	ADHD	OCD	ANO	PanicDisorder	BIP	MDD	SZes	SZgw	Epilepsy	AD	PD
X10	1.57e-16	2.17e-20	0.00541537	1.93e-07	0.00229707	0.424983	0.00202545	0.016581	0.00245392	1.55e-07	0.0182133	5.86e-16	1.02e-08	5.23e-05	6.02e-07
X12	1.31e-15	2.36e-17	0.0119251	2.31e-06	0.002031	0.541228	0.00310463	0.0100537	0.00786743	1.91e-06	0.0118882	8.65e-15	2.81e-07	2.74e-05	5.21e-07
X3	1.55e-14	2.19e-20	0.00646742	2.68e-06	0.0024634	0.585732	0.00479584	0.00633649	0.00571029	3.73e-07	0.0095319	1.24e-15	4.37e-07	0.000375042	8.79e-07
X4	5.95e-14	1.82e-17	0.0108632	3.9e-05	0.00483686	0.697293	0.0111965	0.00868809	0.0117808	1.28e-05	0.0160591	2.8e-14	7.77e-06	4.96e-05	7.31e-07
X6	1.22e-14	8.61e-18	0.00678696	7.67e-06	0.00271587	0.581485	0.00445993	0.0040374	0.0115895	7.04e-07	0.011494	3.76e-15	2.19e-06	0.000170948	2.7e-07
X7	2.93e-15	3.31e-17	0.00664157	2.02e-06	0.00224631	0.560346	0.00222201	0.0123485	0.00754451	1.55e-06	0.0131247	4.89e-15	1.23e-06	0.000126159	5.91e-07
8Co	8.6e-15	8.42e-19	0.0141117	2.75e-06	0.00682364	0.511943	0.0037864	0.00537594	0.0101996	2.16e-06	0.00841573	2.09e-15	2.2e-07	6.34e-06	7.86e-08
8Ve	3.56e-15	9.18e-20	0.021232	4.19e-06	0.00309896	0.455172	0.00377154	0.00501259	0.00983972	3.41e-07	0.0134701	3.89e-16	2.74e-07	2.19e-05	3.99e-07
AHA	6.76e-15	8.41e-21	0.022161	1.06e-06	0.0032044	0.368071	0.00241728	0.00282652	0.00269649	2.81e-08	0.00814575	4.53e-16	3.35e-07	0.00058054	3.47e-07
AOrG	3.55e-21	2.1e-28	0.00663136	2.13e-08	0.000245509	0.458571	0.000217648	0.00269975	0.000283221	1.2e-09	0.0013941	4.85e-24	5.42e-08	0.000710474	1.66e-07
ARH	2.48e-15	2.02e-17	0.0382628	8.08e-07	0.00131964	0.433987	0.000165124	0.00432181	0.00476114	1.9e-07	0.0263839	3.77e-16	2.13e-05	7.5e-05	3.51e-06
ATZ	2.47e-17	6.26e-27	0.00655834	8.64e-08	0.00181167	0.478236	0.00122902	0.00272639	0.000576292	1.24e-08	0.00209516	5.48e-20	1.97e-08	0.00128273	4.1e-07
Acb	2.92e-17	1.73e-25	0.0227394	2.7e-07	0.000536459	0.349522	0.00109412	0.00393772	0.0010159	9.16e-09	0.00458426	1.36e-20	8.81e-07	0.00104928	4.21e-06
AnG.i	1.07e-20	5.41e-29	0.00761689	5.24e-08	0.000283059	0.50403	0.000225418	0.00232775	0.000287733	2.75e-09	0.00104431	8.6e-24	2.64e-08	0.000420733	2.52e-07
AnG.s	6.29e-21	4.68e-29	0.00735315	4.21e-08	0.000228735	0.525484	0.000297097	0.00247964	0.000228556	2.01e-09	0.000932587	7.41e-24	2.06e-08	0.000674722	2.73e-07
Arc	1.03e-15	6.19e-19	0.00728757	1.45e-06	0.00527216	0.516273	0.00359725	0.00981772	0.00978742	1.56e-06	0.0275504	1.62e-16	9.12e-09	3.92e-06	3.32e-08
BCd	4e-17	3.38e-24	0.0213795	9.96e-07	0.000667902	0.388015	0.00322695	0.00579688	0.000818194	3.19e-08	0.00453507	3.96e-21	8.37e-07	0.000190003	8.5e-06
BLA	4.71e-18	2.21e-26	0.0128192	3.23e-07	0.00117713	0.43564	0.000998441	0.00364276	0.0006304	4.8e-08	0.00275945	4.05e-21	1.27e-08	0.000228335	5.98e-07
BMA	3.61e-18	2.13e-27	0.0122902	1.53e-07	0.0011606	0.454311	0.000909446	0.00280988	0.000624321	2.15e-08	0.00252232	2.5e-21	9.72e-09	0.000404441	3.67e-07
BST	1.49e-18	1.44e-26	0.0120698	9.74e-08	0.000394421	0.361636	0.000610165	0.00215954	0.00154721	2.44e-09	0.00240304	6.47e-21	4.16e-07	0.000737961	9.98e-07
CA1	8.62e-20	1.04e-27	0.00431288	2.36e-07	0.00130146	0.698429	0.00168173	0.00601905	0.000223816	4.72e-08	0.000949703	1.91e-21	3.96e-09	0.00149577	6.24e-07
CA2	9.76e-20	2.37e-28	0.00289233	1.84e-06	0.00325552	0.704891	0.00171782	0.0137168	0.0002819	2.72e-07	0.000626317	3.32e-21	4.24e-09	0.00474508	5.3e-07
CA3	4.45e-19	1.52e-28	0.00447347	1.07e-06	0.00184961	0.594981	0.00121768	0.00718425	0.000278227	1.97e-07	0.000633916	1.13e-20	2.79e-09	0.00189	5.17e-07
CA4	3.22e-18	2.61e-28	0.00481022	3.9e-07	0.00130634	0.475352	0.00144499	0.00321419	0.00051109	4.47e-08	0.00107458	1.36e-20	1.94e-09	0.000731299	3.87e-07
CGMB	1.73e-16	5.73e-23	0.0145164	9.5e-08	0.00145318	0.36442	0.00237123	0.00370765	0.00358596	1.52e-08	0.00852297	6.35e-17	3.02e-07	0.000645699	4.3e-07
CGPo	5.3e-15	3.43e-18	0.0269927	6.8e-07	0.00245442	0.352412	0.00160901	0.00899058	0.0075124	1.73e-07	0.0234511	3.54e-16	7.89e-07	4.28e-06	2.8e-07
CGS	4.13e-12	1.5e-17	0.0259703	3.99e-06	0.00147777	0.459164	0.00383586	0.0640043	0.00932449	1.07e-06	0.0253654	2.55e-12	6.47e-06	0.000104185	5.6e-06
CMRt	4.93e-16	7.15e-20	0.0233869	1.52e-06	0.00216432	0.456627	0.003169	0.00529007	0.00703251	2.92e-07	0.00881533	2.13e-16	1.49e-08	6.12e-05	5.54e-07
COMA	6.39e-18	7.19e-27	0.0126891	1.88e-07	0.000877807	0.428211	0.000882	0.00195804	0.000854109	2.33e-08	0.00388006	4.79e-20	2.59e-08	0.000285375	5.92e-07
CPLV	3.32e-09	5.27e-09	0.0279415	1.1e-05	0.0303109	0.891361	0.00425456	0.0477823	0.0618118	2.69e-05	0.0731452	5.5e-08	0.0264664	6.22e-06	5.89e-05
CeA	3.31e-18	5.3e-27	0.0185647	5.57e-08	0.000846373	0.399379	0.000617037	0.00393258	0.00109417	1.03e-08	0.00275538	9.77e-21	1.13e-07	0.00171582	1.06e-06
CgGf.i	1.3e-19	6.12e-27	0.00935659	6.5e-08	0.000402063	0.415195	0.000270902	0.00304953	0.000384041	3.45e-09	0.00255873	6.41e-23	6.57e-08	0.000184221	2.23e-07
CgGf.s	3.95e-20	9.72e-28	0.0095594	5.6e-08	0.000346073	0.455904	0.00023184	0.00357035	0.000293353	2.9e-09	0.00184957	2.04e-23	3.78e-08	0.000355626	1.92e-07
CgGp.i	2.18e-20	5.11e-29	0.00565493	4.96e-08	0.0002451	0.462997	0.000443397	0.00271235	0.000254018	1.96e-09	0.00099673	8.16e-24	2.45e-08	0.000887448	2.54e-07
CgGp.s	2.36e-20	7e-29	0.00677271	4.64e-08	0.000282338	0.479563	0.000332809	0.00302715	0.000219573	2.47e-09	0.00108685	1.22e-23	2.08e-08	0.00074094	2.06e-07
CgGr.i	8.38e-20	5.62e-27	0.0120375	1.41e-07	0.000275262	0.503721	0.00019738	0.00344445	0.000403969	6.34e-09	0.00232006	3.08e-23	6.19e-08	0.00019897	2.53e-07
CgGr.s	9.87e-20	1.16e-26	0.0097147	1.84e-07	0.000493117	0.489751	0.000442238	0.0053976	0.00026783	3.97e-09	0.00191075	4.59e-23	2.42e-08	0.000147162	3.23e-07
Cl	5.27e-19	6.9e-28	0.00347015	4.26e-08	0.000576527	0.570718	0.00122066	0.00665276	0.00084412	2.71e-09	0.00142539	7.3e-22	7e-09	0.00115976	2.65e-07
CnF	1.18e-16	1.89e-21	0.0124407	2.54e-07	0.00227965	0.416772	0.00126287	0.00531604	0.00519316	2.65e-08	0.00785099	4.81e-17	4.14e-07	0.000150676	3.8e-07
Cu	2.64e-15	2.48e-19	0.0239377	3.52e-06	0.00339049	0.455794	0.00451613	0.00500463	0.0107858	5.52e-07	0.00996781	2.91e-16	4.32e-08	8.69e-06	5.93e-07
Cun.pest	7.07e-22	1.5e-29	0.00602126	5.3e-08	0.000194752	0.457766	0.000154934	0.00203512	0.000272516	7.06e-10	0.000795725	6.83e-25	9.14e-08	0.000837057	2.9e-07
Cun.str	1.88e-21	6.86e-29	0.00591331	8.05e-08	0.000270582	0.445895	0.000166638	0.00212062	0.000161446	9.48e-10	0.000614785	2.43e-24	1.17e-07	0.000437564	3.33e-07
DBh	9.49e-17	4.59e-23	0.0158677	1.61e-07	0.00169233	0.356363	0.00177828	0.00281914	0.00317824	1.5e-08	0.0091216	1.02e-18	9.28e-08	9.21e-05	2.67e-07
DBv	9.35e-18	1.2e-23	0.00991054	8.38e-07	0.0013522	0.41487	0.00121687	0.0060864	0.00198845	1.32e-08	0.0102326	2e-19	1.55e-07	0.000247183	5.36e-07
DG	5.16e-20	3.28e-30	0.00599897	1.75e-06	0.00661944	0.651488	0.0002969	0.0183652	8.26e-05	3.84e-08	0.000173638	2e-21	4.01e-08	0.0163234	1.36e-06
DMH	3.72e-17	1.47e-23	0.0101143	8.94e-08	0.0011803	0.314313	0.000636482	0.00151209	0.00284982	3.3e-09	0.00745856	1.8e-18	2.04e-06	0.000673552	4.76e-07
DTA	1.6e-16	4.86e-24	0.0203545	3.87e-07	0.000988202	0.448568	0.00163944	0.00894795	0.00170981	4.65e-08	0.00362225	4.06e-18	1.09e-07	6.18e-05	2.88e-07
DTLd	2.8e-17	2.91e-23	0.0202042	2.66e-07	0.000563919	0.421336	0.000550686	0.0128627	0.00251052	7.71e-09	0.00431247	1.67e-19	3.86e-07	3.86e-05	1.34e-07
DTLv	5.3e-17	3.45e-22	0.0245973	3.75e-07	0.000788892	0.5166	0.000588028	0.00968586	0.00298288	2.85e-08	0.0047608	8.31e-19	5.86e-07	7.9e-05	4.55e-07
DTM	9.76e-17	7.15e-24	0.0176885	1.61e-07	0.000715424	0.468859	0.00110459	0.00807873	0.00176673	9.72e-09	0.00542228	1.23e-18	1.31e-07	0.000110429	2.06e-07
DTP	1.08e-16	2.25e-23	0.0180158	1.01e-07	0.000448262	0.515147	0.000847881	0.00975231	0.0025089	5.73e-09	0.0049796	9.38e-19	2.74e-07	0.000284092	8.35e-08
Dk	3.77e-16	1.78e-20	0.0131754	8.84e-07	0.000866972	0.370284	0.00196847	0.00192808	0.00534188	5.84e-08	0.0127945	2.2e-16	1.05e-06	5.81e-05	6.19e-07
Dt	1.17e-14	4.92e-19	0.0134676	1.08e-05	0.00597677	0.483419	0.00430303	0.00579144	0.00936765	1.63e-06	0.00904069	9.6e-16	9.47e-06	1.01e-05	1.28e-07
EW	2.88e-14	1.16e-19	0.0194535	3.81e-06	0.00217317	0.546368	0.00412226	0.0110744	0.00382257	3.37e-07	0.0114121	4.6e-15	6.96e-07	0.000140846	1.05e-06
Emb	1.63e-14	5.59e-17	0.0505705	1.44e-05	0.00394965	0.431804	0.00677038	0.00449695	0.00697855	3.27e-06	0.0145128	2.49e-15	2.67e-06	3.04e-06	7.46e-07
FP.s	1.42e-20	8.21e-29	0.00821815	2.93e-08	0.000233127	0.526137	0.000299363	0.0017548	0.000297338	4.09e-09	0.00147684	2.25e-23	2.39e-08	0.000420142	3.22e-07
FPi	1.73e-19	2.61e-25	0.0188013	1.59e-07	0.000390737	0.535353	0.00014999	0.0045808	0.000473269	1.98e-08	0.00310744	2.42e-22	5.09e-08	3.03e-05	5.2e-07
FPm	1.71e-20	6.76e-28	0.0130931	6.22e-08	0.000239661	0.504501	6.13e-05	0.00149736	0.00018573	7.18e-09	0.000977847	3.43e-23	1.69e-08	0.000120343	3.4e-07
Fas	1.19e-14	7.48e-19	0.0234102	2.65e-06	0.00637979	0.461933	0.00620093	0.00329318	0.00652984	1.16e-06	0.0109569	5.51e-16	1.68e-06	6.12e-05	5.7e-07
FuG.cos	1.74e-20	1.92e-28	0.00749645	2.76e-08	0.000271275	0.456302	0.000214828	0.0025766	0.000312498	3.08e-09	0.00175638	9.05e-24	4.76e-08	0.000633092	2.13e-07
FuG.its	1.52e-20	3.88e-28	0.00795728	3.72e-08	0.000282889	0.497858	0.000202807	0.00244994	0.000304455	2.37e-09	0.00171157	1.04e-23	3.77e-08	0.000502317	2.01e-07
FuG.l	2.61e-20	1.76e-28	0.00654935	2.94e-08	0.000314848	0.498127	0.000281178	0.00260435	0.000232105	4.19e-09	0.0017285	1.95e-23	2.94e-08	0.000583117	2.25e-07
GPe	1.13e-14	1.37e-18	0.0286234	1.91e-06	0.00163068	0.449666	0.00359122	0.00481499	0.00713801	9.98e-08	0.0119853	1.44e-17	7.04e-06	3.24e-05	1.45e-06
GPi	1.45e-14	4.13e-18	0.0307604	1.9e-06	0.00161284	0.440577	0.00365933	0.00477212	0.00863644	8.26e-08	0.0102497	2.35e-16	1.42e-05	2e-05	1.32e-06
GRe	1.39e-20	2.84e-28	0.00893493	2.88e-08	0.000259283	0.500202	0.000213205	0.0025041	0.000270192	3.64e-09	0.00173786	1.61e-23	4.54e-08	0.000497039	2.39e-07
GiRt	2.4e-16	1.39e-19	0.0176576	1.73e-06	0.00230495	0.503404	0.00225926	0.00641044	0.00823855	1.32e-07	0.00979281	9.06e-17	1.34e-07	0.000107374	2.39e-07
Glo	2.29e-14	6.81e-19	0.0149948	6.03e-06	0.00525498	0.468638	0.00649945	0.00629394	0.00790436	9.51e-07	0.0106378	1.07e-15	2.99e-06	4.11e-05	4.42e-07
Gr	4.71e-15	2.1e-18	0.0483516	2.96e-06	0.00241633	0.457154	0.00561217	0.00483694	0.00865809	8.42e-07	0.0128178	3.99e-15	6.4e-08	3.62e-06	6.85e-07
HCd	2.64e-17	4.53e-25	0.0216223	3.93e-07	0.000424209	0.36579	0.0028513	0.00732243	0.000844153	2.27e-08	0.00455621	2.66e-21	1.45e-06	0.000448318	7.28e-06
HG	6.07e-21	2.63e-29	0.00659664	4.07e-08	0.000256325	0.462499	0.000382004	0.00197452	0.000309491	1.72e-09	0.00109957	9.85e-24	3.62e-08	0.000723228	2.7e-07
He.Crus.I	3.5e-18	7.85e-25	0.00780947	7.77e-07	0.0308207	0.458618	0.000769281	0.0164939	0.000357389	4.97e-08	0.00125307	2.59e-20	4.08e-05	9.68e-05	1.74e-06
He.Crus.II	2.65e-18	8.03e-25	0.00871423	8.6e-07	0.0362608	0.454378	0.000542293	0.0176615	0.000344014	5.14e-08	0.00129382	1.67e-20	6.06e-05	6.5e-05	2.64e-06
He.III	1.5e-17	5.03e-24	0.00283838	7.68e-07	0.0382648	0.420317	0.000698505	0.0247889	0.000358215	8.35e-08	0.00103812	1.46e-19	9.44e-05	0.000126087	1.1e-06
He.IV	7.36e-18	1.21e-23	0.00482032	6.54e-07	0.0268973	0.339453	0.000742525	0.0191413	0.000836839	3.69e-08	0.00114611	4.11e-20	9.64e-05	0.000230716	6.06e-07
He.IX	4.86e-18	1.45e-25	0.00499752	3.55e-07	0.0338805	0.346239	0.00063795	0.0240821	0.000679374	4.58e-09	0.000776281	6.64e-21	0.00017378	0.000308589	8.59e-07
He.V	4.12e-18	2.62e-25	0.00381307	5.42e-07	0.0245897	0.358354	0.000614624	0.0173821	0.000517062	2.92e-08	0.000747856	1.21e-20	9.61e-05	0.000441258	7.99e-07
He.VI	7.43e-18	6.96e-25	0.00670114	8.35e-07	0.0313747	0.420538	0.000760754	0.0166902	0.000360206	7.88e-08	0.00111578	3.61e-20	4.23e-05	0.000121096	1.73e-06
He.VIIB	5.21e-18	5.75e-25	0.00703982	8.27e-07	0.0374202	0.443082	0.000782183	0.0189956	0.000325034	4.44e-08	0.00115993	2.3e-20	6.66e-05	0.000129942	1.99e-06
He.VIIIA	3.4e-18	5.28e-25	0.00636831	9.47e-07	0.0357034	0.435602	0.00065963	0.0201558	0.000363821	3.21e-08	0.00103061	1.33e-20	9.58e-05	0.000134277	2.22e-06
He.VIIIB	9.28e-18	1.29e-24	0.00470924	1.35e-06	0.0611948	0.4456	0.000974502	0.0262021	0.000402928	3.41e-08	0.00082811	2.24e-19	0.000189652	0.00043291	1.52e-06
He.X	1.54e-17	4.72e-23	0.00524008	5.81e-07	0.0241377	0.465692	0.000610635	0.0151656	0.00131717	6.13e-08	0.00236376	2.25e-19	5.84e-05	0.000389006	5.71e-07
Hl	4.44e-16	2.64e-21	0.00960363	7.13e-08	0.00167114	0.370403	0.00461883	0.00355245	0.00441952	3.57e-08	0.00447533	3.04e-16	1.26e-06	3.17e-05	4.58e-07
Hm	7.52e-15	3.99e-22	0.0162899	6.66e-08	0.00792597	0.38097	0.00381151	0.00112124	0.00376978	7.66e-08	0.00522987	4.51e-16	3.99e-05	0.000222722	4.99e-07
IC	2.82e-17	1.53e-22	0.0184474	3.89e-07	0.00154894	0.406826	0.00222201	0.00246854	0.00375349	2.64e-08	0.00351089	3.49e-18	9.19e-07	9.03e-05	4.92e-07
ICjl	1.32e-14	2.41e-18	0.0143346	1.02e-05	0.00428915	0.606147	0.006425	0.00253136	0.00824348	1.32e-06	0.00875602	4.53e-15	4.66e-06	4.65e-05	1.11e-06
ILc	1.42e-16	1.06e-22	0.0285841	1.68e-07	0.000224969	0.472201	0.00115954	0.00944626	0.00515689	1.79e-08	0.00710838	3.9e-18	1.6e-07	0.000141843	2.42e-07
ILr	1.44e-16	5.79e-23	0.0201564	2.62e-07	0.000624368	0.543861	0.000848634	0.0160894	0.00338197	2.2e-08	0.0062225	2.37e-18	2.6e-07	0.000166176	8.38e-08
IO	8.6e-17	5.8e-20	0.00685387	4.69e-06	0.00100302	0.304538	0.00408493	0.0115034	0.00386555	4.42e-07	0.005156	2.22e-16	1.44e-07	7.68e-06	5.91e-07
IOG.i	8.91e-21	8.4e-28	0.00947663	1.07e-07	0.000218276	0.441815	0.000175114	0.00264178	0.000410083	1.67e-09	0.00123836	3.48e-24	8.62e-08	0.000224481	2.84e-07
IOG.s	7.21e-21	1.81e-28	0.009013	9.03e-08	0.00024775	0.470827	0.000193347	0.00256522	0.000343681	1.42e-09	0.00095376	5.07e-24	4.8e-08	0.00038031	2.61e-07
IRoG	1.38e-20	5.81e-28	0.0113061	3.11e-08	0.000258073	0.466354	0.00016774	0.00231558	0.000336465	1.94e-09	0.00182367	2.7e-23	4.55e-08	0.000388815	2.85e-07
ITG.its	1.13e-20	8.95e-29	0.00823319	3.68e-08	0.000262195	0.480668	0.00022037	0.0025452	0.000279944	2.01e-09	0.00142721	5.24e-24	3.79e-08	0.000679602	1.92e-07
ITG.l	3.45e-20	3.59e-28	0.00700952	3.3e-08	0.000282677	0.500833	0.000358866	0.00275164	0.000266034	4.5e-09	0.00156983	3.83e-23	2.94e-08	0.000596781	2.46e-07
ITG.mts	3.07e-20	6.11e-29	0.00674201	3.12e-08	0.000273982	0.462183	0.000387327	0.00261744	0.000364142	3.11e-09	0.00135688	1.87e-23	2.68e-08	0.000800898	2.57e-07
LA	6.43e-19	4.87e-28	0.00862768	1.95e-07	0.00101126	0.42752	0.000726253	0.00307566	0.000653152	1.14e-08	0.00175013	1.5e-21	1.03e-08	0.000555116	3.56e-07
LC	1.52e-16	7.7e-20	0.00556731	7.21e-07	0.00427129	0.537434	0.00136003	0.0200982	0.00184746	5.29e-08	0.0104003	7.97e-16	1.6e-06	0.000854788	3.2e-07
LGd	4.34e-17	2.91e-24	0.0124547	2.39e-06	0.00232608	0.69232	0.000769598	0.00972368	0.00184994	1.91e-07	0.00201459	3.49e-18	1.61e-07	5.88e-05	2.07e-07
LHA	7.16e-16	1.76e-22	0.0191152	9.47e-07	0.00164374	0.423939	0.00135548	0.00228629	0.00494063	6.88e-09	0.00953113	1.13e-17	2.95e-07	0.000861642	5.9e-07
LHM	1.52e-15	3.01e-21	0.0206971	5.63e-07	0.000979597	0.438959	0.00176262	0.000794938	0.00645008	2.19e-08	0.0110491	7.56e-17	9.51e-07	0.000858586	6.69e-07
LHT	2.1e-17	1.65e-23	0.0121143	2.18e-07	0.000900594	0.31232	0.000875959	0.00177502	0.00702733	3.17e-09	0.00632607	9.34e-19	5.82e-07	0.00084545	3.53e-07
LIG	1.39e-20	1.44e-28	0.00842108	3.81e-08	0.000302286	0.455421	0.000206915	0.00266768	0.000269759	2.95e-09	0.00168891	1.39e-23	5.18e-08	0.000475596	1.98e-07
LM	5.11e-15	1.24e-17	0.0275101	2.63e-07	0.00468373	0.357101	0.000233463	0.00100318	0.00421858	1.03e-07	0.0124753	8.87e-15	5.33e-06	0.000325859	6.27e-07
LMRt	3.07e-15	4.77e-19	0.0128284	1.45e-06	0.00303578	0.545727	0.00374019	0.00386954	0.0110065	4.12e-07	0.0127425	1.27e-16	4.21e-08	2.21e-05	1.11e-07
LOrG	1.51e-20	2.69e-28	0.00854119	4.13e-08	0.000271765	0.491648	0.000349777	0.00259231	0.000290104	2.63e-09	0.00118994	1.41e-23	4.09e-08	0.000546231	2.17e-07
LPB	5e-15	7.06e-21	0.0344306	9.77e-07	0.00148011	0.36718	0.00524334	0.00565963	0.00314456	1.27e-07	0.0163165	2.78e-16	9.48e-07	8.25e-05	5.6e-07
LTu	1.32e-17	9.51e-23	0.0164607	1.36e-07	0.00119645	0.377131	0.000955925	0.00362185	0.00134034	4.76e-08	0.00533334	1.15e-18	2.5e-07	0.000163926	6.73e-07
LiG.pest	4.88e-21	2.07e-29	0.00610855	5.98e-08	0.000218276	0.475506	0.000298459	0.0023817	0.000250609	1.15e-09	0.000607334	2.05e-24	4.73e-08	0.000706223	3.33e-07
LiG.str	2.55e-21	6.46e-30	0.00513643	8.29e-08	0.000264817	0.405506	0.000217271	0.00193543	0.00022292	7.65e-10	0.000557467	1.71e-24	9.36e-08	0.000591937	3.19e-07
MB	2.46e-13	2.46e-17	0.0507728	3.33e-06	0.00833226	0.532149	0.00148028	0.00476983	0.00359464	8.61e-07	0.0162652	1.73e-15	6.05e-07	8.2e-06	3.18e-06
MBRF	1.39e-15	1.25e-22	0.00793564	3.38e-07	0.00219041	0.382976	0.00745118	0.0046515	0.00372519	2.74e-08	0.00674612	7.48e-16	4.63e-07	0.00967341	6.21e-07
MBRa	1.59e-16	1.78e-20	0.0175316	1.11e-06	0.00164805	0.384829	0.00185507	0.00976379	0.00386886	8.62e-08	0.0120426	1.27e-15	1.01e-06	0.000365285	2.56e-07
MFG.i	1.43e-20	5.03e-28	0.00974407	4.09e-08	0.000266177	0.53021	0.000263064	0.00253762	0.000207839	3.99e-09	0.00147338	1.8e-23	2.9e-08	0.000357319	3.73e-07
MFG.s	1.17e-20	2.91e-28	0.00813394	3.18e-08	0.000262313	0.512943	0.000317354	0.00243303	0.000274799	3.1e-09	0.00145603	1.79e-23	2.16e-08	0.000602268	3.09e-07
MG	6.74e-17	3.92e-23	0.017605	1.89e-07	0.000865418	0.53448	0.000771135	0.00693814	0.00201037	6.21e-09	0.00349667	4.57e-19	5.24e-07	0.000157487	1.54e-07
MM	1.71e-15	1.07e-19	0.0141385	9.17e-08	0.00725452	0.432591	0.00138287	0.0026591	0.00343094	2.88e-08	0.00361055	3.44e-17	2.68e-06	0.000456664	3.31e-07
MOrG	1.44e-20	7.06e-28	0.00999821	3.56e-08	0.000297624	0.493823	0.000204395	0.00293144	0.000240249	3.97e-09	0.00171273	1.06e-23	5.83e-08	0.00043291	2.58e-07
MPB	3.5e-16	5.48e-21	0.0196881	3.3e-07	0.00178577	0.399762	0.00315979	0.00614344	0.00252931	8.33e-08	0.0109665	8.26e-17	2.96e-07	0.000109897	2.8e-07
MTG.i	2.12e-20	7.51e-29	0.00766218	4.1e-08	0.000258463	0.502181	0.000314222	0.00277125	0.00027554	3.46e-09	0.00133801	1.15e-23	2.6e-08	0.00065394	2.75e-07
MTG.s	1.17e-20	7.39e-29	0.00806393	3.36e-08	0.000261247	0.504665	0.000302179	0.00247266	0.000244557	2.57e-09	0.00128527	1.13e-23	2.97e-08	0.000649478	2.52e-07
Mo5	1.09e-15	2.63e-18	0.00537173	2.11e-06	0.00263693	0.505291	0.00228288	0.00738227	0.00730733	1.21e-06	0.0077541	1.48e-15	1.43e-06	0.000126721	6.06e-07
OPi	5.51e-22	2.35e-28	0.00989444	2.53e-08	0.000230798	0.541473	6.8e-05	0.00105836	0.000144229	8.97e-10	0.00102119	3.9e-24	2.6e-07	0.000494699	3.24e-07
OPl	2.39e-21	5.68e-28	0.00805154	9.18e-08	0.000233795	0.599628	0.000245817	0.00350626	4.08e-05	3.74e-09	0.00042687	1.29e-24	8.46e-08	0.000681965	1.6e-07
OPs	2.68e-21	2.23e-28	0.00610141	4.18e-08	0.000169345	0.525316	0.000119418	0.00114501	0.000120734	1.97e-09	0.000894766	4.11e-24	3.53e-07	0.000198046	4.49e-07
OTG.i	5.44e-21	7.22e-29	0.00890989	4.51e-08	0.000237993	0.507139	0.000229055	0.00248281	0.000205097	2e-09	0.00109594	2.49e-24	3.51e-08	0.000696272	2.44e-07
OTG.s	1.03e-20	2.8e-29	0.00761184	5.03e-08	0.00025532	0.472686	0.000298547	0.00282938	0.000286447	1.91e-09	0.000914637	2.07e-24	4.11e-08	0.000853756	2.22e-07
OlfT	3.85e-19	2.98e-26	0.0162569	1.33e-07	0.000624191	0.438726	0.000360122	0.00194509	0.000810846	2.68e-09	0.00235669	1.36e-21	1.9e-07	0.000560027	2.07e-06
PCLa	1.24e-20	5.08e-26	0.0090405	1.34e-07	0.000300395	0.486489	0.000167676	0.0030821	0.00028089	4.68e-09	0.00206086	2.41e-23	1.26e-07	0.000204083	2.56e-07
PCLa.i	6.04e-20	5.33e-28	0.0090747	1.1e-07	0.000323443	0.477092	0.000419167	0.0027485	0.000267566	3.63e-09	0.00145105	3.94e-23	2.19e-08	0.000720545	2.42e-07
PCLa.s	8.21e-20	1.32e-27	0.00847245	1.3e-07	0.000376263	0.523408	0.000614323	0.00280728	0.000253369	5.96e-09	0.00149442	1.46e-22	1.26e-08	0.000858663	2.82e-07
PCLp.cs	5.1e-21	1.06e-28	0.00595562	4.82e-08	0.000288415	0.439406	0.000342825	0.00188214	0.000159299	1.25e-09	0.00102274	3.2e-23	4.65e-08	0.000825447	3.36e-07
PCLp.l	1.03e-20	5.91e-30	0.00303639	2.49e-08	0.000320427	0.55504	0.00065298	0.00186613	0.000271607	1.1e-09	0.000835365	3.28e-23	8.3e-09	0.00389991	2.59e-07
PHA	5.29e-16	3.3e-22	0.0165014	1.31e-07	0.000927102	0.403159	0.000696958	0.000730197	0.00322511	9.24e-09	0.0131572	2.81e-17	1.49e-06	0.00147397	1.01e-06
PHG.cos	6.29e-20	1.45e-28	0.00689181	2.22e-08	0.000314614	0.480447	0.000357822	0.00254477	0.00031271	3.29e-09	0.0018749	6.33e-23	1.73e-08	0.000588496	2.76e-07
PHG.l	1.12e-19	7.23e-28	0.00556838	2.16e-08	0.000359997	0.385032	0.000416129	0.00387808	0.000481525	1.32e-09	0.00228437	4.67e-23	6.83e-08	0.000339595	1.91e-07
PIN	4.29e-17	2.36e-24	0.0114904	1.43e-07	0.00124786	0.349164	0.00150026	0.00238537	0.0026657	2.39e-09	0.00450155	1.17e-18	3.3e-07	0.000298154	6.41e-08
PLP	2.5e-20	6.59e-28	0.00890391	5.29e-08	0.000301204	0.443225	0.000201827	0.0032459	0.000321581	1.98e-09	0.00165014	1.17e-23	1.01e-07	0.000435051	1.87e-07
PLT	2.51e-20	3.38e-29	0.00618987	2.81e-08	0.000263384	0.454694	0.00045274	0.00202875	0.000312618	1.65e-09	0.0010442	2.08e-23	2.74e-08	0.000953	2.23e-07
POrG	5.86e-21	1.52e-27	0.007618	4.61e-08	0.000254819	0.463937	0.00017366	0.00472411	0.000375686	2.09e-09	0.00160672	8.18e-24	7.51e-08	0.000305813	1.64e-07
PRF	2.45e-16	1.31e-20	0.0164656	1.11e-06	0.0020438	0.458963	0.00386241	0.00564412	0.00772523	8.28e-08	0.00894225	3.08e-17	2.17e-07	0.00023499	2.05e-07
PTG	2.7e-16	3.9e-24	0.0157061	2.34e-07	0.00153616	0.521995	0.000588482	0.00712637	0.000795421	1.3e-07	0.00894189	4.53e-20	1.91e-08	2.57e-05	2.4e-06
PTec	5.6e-17	2.45e-23	0.0177706	1.51e-07	0.000713771	0.369059	0.00257024	0.00278697	0.00358107	8.73e-09	0.00710779	2.94e-18	9.61e-07	0.00095381	6.84e-07
PV.Crus.I	2.5e-18	4.76e-25	0.00650827	5.96e-07	0.0279699	0.458034	0.000620022	0.0145574	0.000291653	6.35e-08	0.00134556	1.81e-20	4.57e-05	8.85e-05	1.52e-06
PV.Crus.II	5.26e-18	1.08e-24	0.00757121	6.6e-07	0.0328092	0.439006	0.000630555	0.0174649	0.000347829	5.34e-08	0.00136654	3e-20	5.96e-05	0.000110687	1.62e-06
PV.III	2.29e-17	7.96e-25	0.00399033	2.66e-07	0.0299209	0.389338	0.00143531	0.0156567	0.000360917	2.81e-08	0.00104032	8.51e-20	5.11e-05	0.000499924	6.87e-07
PV.IV	4.29e-18	1.4e-24	0.00635376	4.45e-07	0.0266539	0.412257	0.000459234	0.017414	0.000374329	6.22e-08	0.00126556	1.97e-20	8.83e-05	0.000101196	1.06e-06
PV.IX	6.32e-18	3.64e-24	0.0104892	1.53e-06	0.0435782	0.476592	0.000804443	0.0203009	0.00054193	1.01e-07	0.00141272	5.21e-20	4.23e-05	6.1e-05	2.24e-06
PV.V	5.91e-18	1.15e-24	0.00668451	1.05e-06	0.0336282	0.442253	0.000477941	0.0142867	0.000352468	1.24e-07	0.00130952	5.06e-20	4.92e-05	6.89e-05	1.82e-06
PV.VI	5.35e-18	6.4e-25	0.0081937	8.3e-07	0.0337192	0.475813	0.00057487	0.0161969	0.000280231	1.42e-07	0.00136856	3.66e-20	4.76e-05	6.78e-05	1.84e-06
PV.VIIB	5.3e-18	4.13e-24	0.0091364	9.43e-07	0.0322988	0.460961	0.000610678	0.0161703	0.000317631	6.69e-08	0.00151151	3.67e-20	5.85e-05	4.85e-05	2.76e-06
PV.VIIIA	1.98e-18	1.18e-24	0.00930939	9.22e-07	0.0313118	0.461464	0.000427913	0.0157933	0.000374446	6.32e-08	0.00153716	1.94e-20	6.88e-05	5.25e-05	3.24e-06
PV.VIIIB	9.4e-18	1.27e-23	0.00825757	1.08e-06	0.0270386	0.467463	0.000775121	0.0131731	0.000327281	7.64e-08	0.00193094	3.29e-20	4.84e-05	5.71e-05	2.18e-06
PV.X	2.17e-17	1.91e-22	0.0180846	1.1e-05	0.0308094	0.534807	0.000359389	0.00959716	0.000575989	2.18e-06	0.0043799	2.95e-19	6.47e-05	1.33e-06	2.51e-06
PVH	1.14e-14	7.34e-20	0.0134884	8.99e-07	0.00232844	0.5066	0.000726102	0.00488422	0.00267748	2.54e-08	0.0231607	1.06e-15	1.46e-06	0.000125861	1.2e-06
Pa	4.15e-11	2.15e-17	0.0295736	2.86e-06	0.00305759	0.488414	0.00730019	0.0193202	0.0143761	7.7e-07	0.0313421	3.41e-12	6.07e-06	0.000222281	3e-06
PaOG	1.33e-19	2.4e-27	0.00923694	5.49e-08	0.00039773	0.493443	0.000289495	0.00453579	0.000349486	6.68e-09	0.00295307	6.87e-23	7.23e-08	0.000375854	4.33e-07
PalHy	1.51e-15	4.91e-18	0.0297653	1.02e-06	0.00159748	0.299362	0.00112941	0.00131078	0.00863185	3.36e-08	0.0135981	2.51e-16	3.17e-06	0.000322978	4.38e-07
Pcu.i	5.56e-21	2.9e-29	0.00679724	4.48e-08	0.000205381	0.477092	0.000296025	0.00232136	0.000271991	1.69e-09	0.00092423	3e-24	3.8e-08	0.000757902	2.89e-07
Pcu.s	9.73e-21	9.14e-29	0.00764569	5.47e-08	0.000238427	0.457661	0.000271668	0.00301146	0.000298529	1.1e-09	0.000866567	4.48e-24	4.41e-08	0.000970596	2.22e-07
PeF	3.05e-16	1.5e-21	0.0275754	2.29e-07	0.00119645	0.339735	0.000912289	0.00188066	0.0037147	3.36e-09	0.00807979	1.08e-17	1.9e-06	0.000495177	5.42e-07
Pir	1.03e-18	1.72e-26	0.00478872	3.9e-08	0.0010899	0.430467	0.000905381	0.00154649	0.000805547	2.23e-09	0.0015501	2.46e-21	1.13e-08	0.000898987	2.41e-07
Pn	5.07e-16	9.61e-20	0.0047238	2.58e-06	0.00630307	0.599203	0.00236112	0.0125827	0.0127718	1.54e-06	0.017738	2.77e-17	1.57e-08	3.1e-05	6.26e-08
PoG.cs	2.91e-20	3.69e-28	0.00892186	9.62e-08	0.000271643	0.450449	0.000392591	0.00199633	0.000250852	2.35e-09	0.00114188	2.16e-23	4.26e-08	0.000386906	3.97e-07
PoG.il	2.04e-20	3.62e-28	0.00770962	6.6e-08	0.000293732	0.480438	0.000307409	0.00219796	0.00029742	2.2e-09	0.00130461	2.74e-23	2.82e-08	0.000380652	2.99e-07
PoG.pcs	1.13e-20	3.15e-29	0.0088141	4.76e-08	0.000293996	0.478313	0.000265581	0.00203565	0.000233162	2.11e-09	0.00100503	8.98e-24	2.73e-08	0.000654755	2.98e-07
PoG.sl	2.75e-20	1.28e-27	0.00913677	8.22e-08	0.00027713	0.502585	0.000251572	0.00204657	0.000283783	2.1e-09	0.00129728	2.48e-23	5.18e-08	0.000308634	3.01e-07
Pr5	4.89e-16	9.8e-22	0.0188424	1.98e-06	0.00566881	0.506494	0.00455138	0.00248939	0.00362748	3.18e-07	0.00507998	3.9e-16	3.48e-07	7.66e-05	1.04e-07
PrG.cs	3.45e-20	5.01e-28	0.00847644	1.08e-07	0.000309591	0.447665	0.000542696	0.00235853	0.000392936	2.9e-09	0.00125805	4.33e-23	2.57e-08	0.000761641	3.3e-07
PrG.il	3.48e-20	9.35e-28	0.00888183	6.58e-08	0.00029718	0.492967	0.000459168	0.0025118	0.000254105	4.02e-09	0.00154663	3.73e-23	2.59e-08	0.000651946	3.41e-07
PrG.prc	1.59e-20	2.92e-27	0.00861465	8.47e-08	0.000286734	0.504126	0.000369032	0.00261122	0.000281755	4.59e-09	0.00161783	2.71e-23	3.16e-08	0.000344033	2.78e-07
PrG.sl	5.46e-20	1.79e-27	0.00781399	7.13e-08	0.000321381	0.461838	0.000455308	0.0029376	0.000292113	3.29e-09	0.00158286	5.72e-23	2.86e-08	0.000726186	2.7e-07
PrOR	5.03e-17	1.81e-24	0.0105588	1.82e-07	0.00154894	0.485709	0.000491512	0.00150441	0.00287231	3.69e-09	0.00845434	8.62e-19	4.97e-07	0.00328035	9.6e-07
Pu	8.14e-18	5.54e-25	0.0187457	6.92e-07	0.000588975	0.354871	0.00294665	0.00611486	0.000930364	2.04e-08	0.00367696	1.14e-21	1.54e-06	0.000415987	8.28e-06
R	4.22e-16	1.01e-18	0.0437837	1.85e-06	0.00455863	0.479063	0.00262332	0.00427458	0.00578398	3.15e-07	0.0112187	9.83e-17	3.78e-06	2.75e-05	9.67e-07
RN	7.49e-16	4.38e-19	0.0497707	2e-06	0.00185369	0.40706	0.00346464	0.00264762	0.00647594	3.44e-07	0.00924341	3.43e-16	3.53e-06	5.21e-05	6.08e-07
RPn	1.05e-16	4.14e-19	0.0173184	3.63e-07	0.00138863	0.46434	0.00216398	0.00514029	0.0129605	2.33e-08	0.0112595	3.35e-17	2.51e-07	0.000228099	2.05e-07
RaM	5.25e-16	4.35e-19	0.013609	1.46e-06	0.00259238	0.471961	0.00376233	0.00569814	0.00823842	1.47e-07	0.0142409	7.65e-17	4.65e-08	0.000104004	1.82e-07
S	9.91e-20	3.46e-28	0.00662186	5.52e-08	0.000700034	0.518601	0.00095444	0.00513989	0.000318419	3.71e-09	0.00149865	3.96e-22	5.08e-09	0.000808489	3.61e-07
SC	3.97e-17	4.01e-22	0.0255425	2.96e-07	0.00113443	0.382101	0.00173423	0.00181339	0.00153461	2.56e-08	0.0058435	3.53e-18	5.25e-07	0.000104977	4.75e-07
SCG	1.55e-19	1.1e-26	0.011328	6.36e-08	0.000385837	0.403907	0.000169861	0.00401775	0.000558487	3.89e-09	0.00425612	1.61e-22	1.17e-07	9.55e-05	3.92e-07
SFG	2.77e-21	4.01e-28	0.00852374	5.16e-08	0.000253705	0.534878	0.000206586	0.00504315	0.000229398	3.32e-09	0.00129401	3.56e-24	9.84e-08	0.000970185	1.72e-07
SFG.l	1.26e-20	3.34e-28	0.00848633	3.6e-08	0.000239588	0.495547	0.000280616	0.00251158	0.000254603	2.55e-09	0.00142148	1.04e-23	2.79e-08	0.000585903	2.85e-07
SFG.m	1.16e-20	2.48e-28	0.00774769	3.38e-08	0.000262709	0.491041	0.000289945	0.00291988	0.00028574	2.55e-09	0.00149983	1.62e-23	2.96e-08	0.000616117	2.24e-07
SI	1.27e-17	3.29e-24	0.0150167	4.88e-07	0.000919492	0.34795	0.00102082	0.0019979	0.00166787	8.85e-09	0.00749328	3.44e-19	3.09e-07	0.000533373	2.49e-06
SIG	1.92e-20	2.12e-28	0.0080321	2.77e-08	0.00027242	0.467314	0.000265561	0.0032764	0.00027145	2.13e-09	0.00197688	1.62e-23	5.06e-08	0.000611299	1.83e-07
SMG.i	2.69e-20	2.5e-29	0.00677499	3.86e-08	0.000278674	0.536983	0.000457594	0.00223295	0.00021698	2.17e-09	0.00106951	1.15e-23	2.56e-08	0.000945068	2.02e-07
SMG.s	7.81e-21	1.52e-28	0.00836501	4.57e-08	0.000254012	0.48443	0.000259042	0.00265617	0.000256476	1.21e-09	0.00111377	5.55e-24	5.72e-08	0.000558755	2.01e-07
SNC	3.95e-16	1.72e-20	0.00906182	6.63e-07	0.00206857	0.629985	0.00234525	0.00212393	0.00304769	3.09e-07	0.0089321	1.22e-16	1.47e-06	6.34e-05	8.02e-08
SNR	1.14e-14	4.55e-17	0.0420806	2.84e-06	0.0028109	0.467938	0.00537727	0.00332229	0.0101958	4.32e-07	0.0169362	1.73e-15	3.76e-06	2.95e-06	3.34e-07
SO	1.94e-13	4.84e-18	0.0158785	9.24e-07	0.00687944	0.499119	0.00366919	0.0144452	0.00277552	8.46e-07	0.0234685	1.59e-13	1.86e-06	1.77e-06	5.18e-07
SOC	1.45e-15	3.06e-19	0.0280808	3.39e-06	0.00258167	0.488577	0.00324448	0.00315527	0.00991878	8.94e-07	0.00693038	1.55e-16	1.4e-06	3.99e-05	5.11e-07
SOG.i	3.43e-21	2.65e-28	0.00802548	6.68e-08	0.00026386	0.512068	0.00020111	0.00250196	0.000233727	1.72e-09	0.00118178	1.88e-24	5.09e-08	0.000285148	2.74e-07
SOG.s	5.95e-21	1.04e-28	0.00795695	5.9e-08	0.000245026	0.489054	0.000283477	0.00264044	0.000272481	1.98e-09	0.000821673	5.04e-24	3.36e-08	0.000539246	2.61e-07
SPL.i	4.09e-21	8.02e-29	0.00718042	4.43e-08	0.000214606	0.46991	0.000284675	0.00232775	0.000285386	1.24e-09	0.000995924	4.16e-24	4.55e-08	0.000592873	1.92e-07
SPL.s	1.28e-20	5.82e-28	0.00787591	4.23e-08	0.000248088	0.465213	0.00023947	0.00261522	0.000274781	1.26e-09	0.00124514	8.79e-24	4.95e-08	0.000474805	2.61e-07
SRoG	4.43e-21	3.79e-28	0.00759796	3.66e-08	0.000228596	0.502739	0.000127635	0.0031487	0.000274071	2.46e-09	0.00169054	5.52e-24	5.33e-08	0.0003548	1.53e-07
STG.i	1.9e-20	1.48e-28	0.008147	4.31e-08	0.000272338	0.512481	0.000291858	0.00234017	0.000279741	2.39e-09	0.00137145	1.11e-23	3e-08	0.000593417	2.85e-07
STG.l	1.85e-20	2.33e-28	0.00705634	4.38e-08	0.000317721	0.479303	0.000284528	0.00310615	0.000268951	2.94e-09	0.00120892	1.31e-23	4.75e-08	0.000580391	2.22e-07
Sb	4.6e-16	1.18e-18	0.0273595	1.27e-06	0.000800381	0.408175	0.00257183	0.00203919	0.00533189	3.16e-07	0.00852924	5.31e-17	2.04e-06	6.9e-05	1.34e-06
Sp5	3.92e-17	1.28e-22	0.0203124	8.14e-07	0.002174	0.402243	0.00237294	0.00453069	0.00480007	1.12e-07	0.00589658	5.39e-18	3.23e-09	5.72e-05	5.97e-07
SptN	6.47e-17	1.11e-25	0.0231147	2.26e-07	0.000688426	0.300419	0.00144019	0.00213242	0.00234482	3.21e-09	0.00512241	4.93e-19	1.95e-07	0.000376785	1.02e-06
SuM	1.28e-16	3.29e-22	0.0138851	6.97e-08	0.00112269	0.293371	0.000274159	0.00054661	0.00385985	6.4e-09	0.00773523	5.11e-17	4.84e-06	0.00146347	4.91e-07
SubC	8.31e-16	4.49e-20	0.0170139	8.57e-07	0.00214179	0.444369	0.00377188	0.00739435	0.00568781	1.64e-07	0.00833897	2.41e-16	2.47e-07	0.000372725	3.03e-07
SubCn	6.73e-16	5.78e-21	0.019306	1.14e-06	0.00179553	0.443702	0.00369008	0.00325916	0.00710561	1.12e-07	0.00881819	2.71e-16	6.07e-07	0.000205311	1.07e-06
TCd	7.53e-18	1.13e-25	0.014794	8.75e-07	0.000924305	0.458973	0.00401974	0.00387682	0.000460898	9.65e-08	0.00230615	2.89e-21	1.03e-07	0.000339386	7.85e-06
TG	8.09e-21	9.17e-29	0.0072382	2.96e-08	0.000259283	0.456215	0.000327333	0.00281154	0.000294185	8.41e-10	0.000969167	6.18e-24	5.12e-08	0.000756505	1.91e-07
TM	7.88e-17	2.22e-20	0.0203767	9.77e-08	0.00185225	0.400181	0.00016553	0.000624944	0.0037101	8.98e-09	0.00963212	7.75e-17	4.02e-06	0.000480425	3.78e-07
TP.i	2.28e-20	3.15e-28	0.00868565	3.01e-08	0.000260814	0.452208	0.00018673	0.002611	0.000264328	3.33e-09	0.0019798	1.43e-23	3.56e-08	0.000362744	2.63e-07
TP.m	1.05e-19	1.27e-27	0.0118929	2.49e-08	0.000359732	0.419901	0.000172812	0.002486	0.000276934	2.78e-09	0.00287891	4.05e-23	8.84e-08	0.000274785	2.33e-07
TP.s	5.19e-20	3.54e-27	0.0112145	4.41e-08	0.000357509	0.4634	0.000134188	0.00243699	0.000277111	3.89e-09	0.0025071	1.97e-23	6.74e-08	0.000280997	2.85e-07
VMH	2.46e-16	2.12e-22	0.0152172	6.32e-07	0.001118	0.439777	0.000602392	0.00754723	0.00318614	3.61e-08	0.00932666	3.38e-17	1.11e-06	0.00048762	4.15e-07
VTA	2.27e-16	5.75e-21	0.0167924	5.24e-07	0.00119741	0.40721	0.00400975	0.00255258	0.00632686	6.41e-08	0.00791661	5.21e-17	9.4e-07	0.000149484	3.64e-07
Ve.I.II	1.41e-16	1.1e-22	0.00598925	2.08e-06	0.0224918	0.452729	0.00208642	0.0201457	0.000348605	1.49e-07	0.00207411	4.1e-19	6.8e-05	0.000483089	6.04e-07
Ve.III	1.14e-17	5.15e-24	0.00727482	1.77e-06	0.0254309	0.468302	0.0008908	0.013288	0.000430225	2.2e-07	0.0018991	5.37e-20	4.4e-05	0.000147671	1.6e-06
Ve.IV	1.02e-17	4.25e-24	0.00775796	1.79e-06	0.0307362	0.476986	0.000729521	0.0159605	0.000331742	2.39e-07	0.00183367	1.15e-19	3.68e-05	0.000138778	1.87e-06
Ve.IX	8.42e-18	1.26e-23	0.0074638	2.08e-06	0.0362511	0.489472	0.000553608	0.0143452	0.000429673	7.2e-08	0.00189511	8.36e-20	7.39e-05	0.000156581	2.28e-06
Ve.V	1.22e-17	6.87e-24	0.010225	2.17e-06	0.0367015	0.514627	0.000579741	0.016469	0.000460651	3.08e-07	0.00182148	7.6e-20	5.26e-05	6.6e-05	2.64e-06
Ve.VI	4.39e-17	1.68e-23	0.00809753	1.44e-06	0.035197	0.491648	0.00126137	0.01491	0.000377104	2.71e-07	0.00185952	4.07e-19	2.92e-05	0.000135251	1.66e-06
Ve.VIIAf	3.35e-17	1.89e-24	0.00602216	1.1e-06	0.0336312	0.491888	0.00176239	0.0191067	0.000414178	1.36e-07	0.0011269	1.31e-19	5.89e-05	0.000480986	1.34e-06
Ve.VIIAt	3.28e-18	5.95e-24	0.0066772	9.83e-07	0.0369905	0.446057	0.00066574	0.0162582	0.000612127	5.78e-08	0.00169496	7.28e-20	6.98e-05	0.0001569	2.87e-06
Ve.VIIB	8.95e-18	3.71e-24	0.00825588	1.27e-06	0.0265267	0.487514	0.000722748	0.0165516	0.000314212	9.73e-08	0.00186523	6.07e-20	4.65e-05	0.000136893	1.87e-06
Ve.VIIIA	7.38e-18	3.38e-24	0.00602177	1.69e-06	0.0315468	0.439339	0.000533679	0.0160894	0.000431117	9.33e-08	0.00161501	6.62e-20	6.27e-05	0.000158456	2.41e-06
Ve.VIIIB	1.08e-17	6.28e-24	0.00673464	2.01e-06	0.0276462	0.498724	0.00110618	0.0141357	0.000352557	1.26e-07	0.00177406	1.67e-19	3.83e-05	0.000226025	2.19e-06
Ve.X	1.66e-16	1.17e-21	0.00746489	3.06e-06	0.0268168	0.497386	0.000903416	0.0131406	0.000980281	1.38e-07	0.00388179	1.31e-18	7.03e-05	0.000299156	8.74e-07
ZI	3.37e-16	2.11e-19	0.0344318	1.37e-06	0.00199174	0.381927	0.00222984	0.00232435	0.00676664	5.6e-08	0.00996462	3.14e-17	1.15e-06	3.41e-05	7.69e-07
cc	2.54e-14	2.44e-15	0.0467808	6.65e-06	0.0034428	0.361921	0.00414422	0.0371534	0.00814705	7.51e-07	0.011485	6e-16	0.00118023	3.04e-06	4.71e-06
cgb	7.57e-16	3.41e-19	0.0259213	1.76e-06	0.00328276	0.364484	0.00332227	0.013491	0.00957427	9.4e-08	0.0040801	9.96e-18	0.00013225	0.000502961	1.89e-06
fro	1.41e-20	3.53e-28	0.00964493	3.19e-08	0.000301069	0.50867	0.000330212	0.00321071	0.000278882	3.6e-09	0.00173385	2.86e-23	3.99e-08	0.000472094	2.16e-07
nbM	1.65e-17	3.67e-21	0.00770451	2.04e-06	0.00160504	0.381374	0.000755898	0.00905418	0.0039887	2.24e-08	0.0142812	1.65e-18	9.18e-07	0.000271225	1.82e-06
opIFG	2.89e-20	6.02e-28	0.0098429	5.46e-08	0.000258034	0.466959	0.000281553	0.00273078	0.000218053	2.96e-09	0.00159197	1.86e-23	5.12e-08	0.000360423	2.62e-07
orIFG	1.46e-20	3.89e-28	0.00842625	3.89e-08	0.000243545	0.490348	0.00027478	0.00275001	0.00023807	3.17e-09	0.00142183	1.44e-23	3.52e-08	0.000441578	2.15e-07
trIFG	1.57e-20	2.03e-27	0.0105348	5.55e-08	0.000311907	0.540634	0.000259853	0.00318753	0.000253543	4.37e-09	0.00161078	2.7e-23	4.3e-08	0.000256011	3.53e-07
