# Supplementary material for: Spatiotemporal Brain Transcriptomics Reveal Risk Gene Hot-Spots in Major Neuropsychiatric Disorders
Source: Research Square preprint supplement (doi:10.21203/rs.3.rs-7667905/v1), 2025-10-08
Supplement: Supplementary file 11 [file Supplemental Table 7. Data supporting Fig. S3b and Fig. S7, Enrichment of the 15 risk gene sets in single cell transcriptomes.xlsx]

## Sheet: r_rank_biserial_devlopmental
	IQ	ASD	TS	Neuroticism	ADHD	OCD	ANO	PanicDisorder	BIP	MDD	SZes	SZgw	Epilepsy	AD	PD
Fetal.Astro	0.193942	0.380669	0.0861377	0.131684	0.254332	-0.039377	0.227879	0.307164	0.12375	0.102474	0.364401	0.176461	0.161677	-0.0782373	0.155649
Fetal.Endo	0.198141	0.35901	0.0967719	0.120016	0.245732	-0.044085	0.265067	0.312692	0.0702202	0.106457	0.307198	0.156671	0.17439	-0.0717851	0.227138
Fetal.ExN	0.193944	0.354182	0.08882	0.126201	0.211248	-0.0371182	0.252712	0.297706	0.0844335	0.102403	0.286759	0.167073	0.137763	-0.0704924	0.215688
Fetal.IPC	0.202644	0.358833	0.100411	0.134826	0.240603	-0.0747553	0.283666	0.2865	0.11391	0.112429	0.310152	0.169895	0.138199	-0.0583208	0.165321
Fetal.IntN	0.199523	0.354336	0.101315	0.137304	0.299895	0.0318015	0.28945	0.270623	0.0833341	0.104948	0.319815	0.163281	0.16848	-0.0819149	0.192565
Fetal.Microglia	0.154044	0.367729	0.0689131	0.0850656	0.221468	0.0503157	0.217053	0.195153	0.0869237	0.0702412	0.321198	0.136211	0.149684	-0.0485912	0.142884
Fetal.NEP	0.173686	0.337904	0.075319	0.117374	0.295574	0.00379405	0.303099	0.297614	0.0626123	0.0903045	0.25529	0.153994	0.121623	-0.0767217	0.150257
Fetal.OPC	0.236928	0.38628	0.0976536	0.125448	0.336932	-0.0290542	0.253312	0.322431	0.0992979	0.10493	0.313922	0.18206	0.185159	-0.0925263	0.19499
Fetal.Oligo	0.151912	0.313276	0.0587061	0.0746079	0.186901	-0.124022	0.229553	0.243462	0.0804708	0.0500041	0.246328	0.128807	0.0837159	-0.0632013	0.08683
Fetal.Per	0.189342	0.3607	0.119217	0.131542	0.31814	0.00303093	0.243378	0.331141	0.0963761	0.107648	0.263859	0.164906	0.144143	-0.0551901	0.221318
Fetal.Trans	0.186103	0.319735	0.0572547	0.117135	0.290284	-0.0218163	0.277634	0.275414	0.0759144	0.103813	0.293418	0.150039	0.117726	-0.0689542	0.190509
Fetal.quiescent	0.245111	0.391467	0.111172	0.11908	0.237191	0.0148063	0.256768	0.329056	0.0930812	0.0935002	0.476342	0.154262	0.17159	-0.133585	0.156205
Fetal.replicating	0.142184	0.304388	0.0342855	0.0592254	0.293107	-0.00476726	0.107282	0.284377	0.0548735	0.0473272	0.410537	0.102933	0.119941	-0.125212	0.10073
Astro	0.171992	0.253243	0.0331668	0.0807418	0.280467	-0.0300903	0.211876	0.26419	0.00550711	0.100558	0.390986	0.102305	0.184545	-0.130899	0.167348
Endo	0.115019	0.2446	0.0142255	0.0213109	0.0662677	0.00531311	0.177172	0.146654	0.00730008	0.0432112	0.26603	0.0731545	0.120416	-0.0973639	0.146718
Microglia	0.113748	0.245671	0.11979	0.046181	0.137958	-0.0274059	0.18421	0.11885	0.0416937	0.0705706	0.292026	0.0688454	0.130982	-0.0343378	0.248914
Neurons	0.199912	0.335745	0.0513263	0.0720311	0.189415	0.0059667	0.228275	0.343174	0.0814394	0.088554	0.482243	0.154543	0.258198	-0.145874	0.228323
OPC	0.108648	0.299359	0.0267029	0.0633616	0.0595574	0.0984264	-0.0338053	0.0774558	-0.0213311	0.0770337	0.48506	0.0579558	0.130417	-0.127397	0.254964
Oligo	0.163898	0.286781	0.0298007	0.0482787	0.222861	0.0312179	0.125045	0.330916	0.0191416	0.0701918	0.42599	0.120899	0.173996	-0.113143	0.220933
Ex1	0.328081	0.629748	0.188106	0.215627	0.412397	0.145971	0.232966	0.209582	0.165587	0.186078	0.59889	0.25368	0.282983	-0.0816357	0.348942
Ex2	0.324935	0.61265	0.184027	0.220027	0.446085	0.151428	0.179505	0.172111	0.146632	0.19182	0.587018	0.256197	0.284446	-0.0869913	0.353044
Ex3	0.314479	0.624824	0.170041	0.207217	0.498807	0.137028	0.217226	0.229012	0.164848	0.187532	0.60467	0.242106	0.308362	-0.0799351	0.338591
Ex4	0.33205	0.631758	0.206642	0.215949	0.455618	0.0426001	0.187717	0.195912	0.158419	0.184253	0.623394	0.262744	0.317252	-0.0798515	0.342228
Ex5	0.320082	0.635897	0.199579	0.226632	0.480234	0.138841	0.184831	0.173474	0.154138	0.182023	0.585859	0.251498	0.301562	-0.081095	0.35067
Ex6	0.323387	0.626424	0.222997	0.223344	0.380864	0.190155	0.211946	0.156478	0.159627	0.182744	0.571747	0.241413	0.281555	-0.0829688	0.349121
Ex7	0.328225	0.618675	0.209132	0.226533	0.444641	0.0993457	0.225563	0.167187	0.171282	0.178444	0.587059	0.257614	0.288949	-0.077308	0.352229
Ex8	0.322019	0.610003	0.202817	0.21886	0.48217	0.0561549	0.224569	0.171457	0.180349	0.188567	0.575292	0.251501	0.294073	-0.0757655	0.364111
In1	0.316753	0.640857	0.115304	0.207467	0.347933	0.188728	0.211535	0.320162	0.160544	0.18464	0.623557	0.247663	0.327543	-0.0992779	0.334128
In2	0.321398	0.603602	0.118166	0.202207	0.324441	0.180183	0.212904	0.270991	0.149299	0.179511	0.60735	0.221727	0.309228	-0.0887454	0.333839
In3	0.300109	0.608721	0.110544	0.221042	0.430166	0.166157	0.289339	0.261868	0.167134	0.18523	0.58077	0.218187	0.293125	-0.0651781	0.359491
In4	0.304242	0.632264	0.13493	0.215688	0.280322	0.190961	0.220306	0.332306	0.160136	0.184293	0.620522	0.234398	0.300506	-0.082375	0.303386
In5	0.303562	0.626957	0.142598	0.212177	0.31672	0.174478	0.248712	0.314183	0.167097	0.180785	0.582937	0.222636	0.316904	-0.0806632	0.308792
In6	0.305918	0.623096	0.15075	0.215222	0.316072	0.111055	0.240147	0.368946	0.163083	0.183144	0.577681	0.2308	0.322213	-0.0847028	0.317136
In7	0.293351	0.607676	0.128498	0.21643	0.326518	0.0815138	0.1521	0.253087	0.181005	0.181317	0.571948	0.231314	0.300777	-0.0798762	0.294326
In8	0.291198	0.635181	0.141134	0.214002	0.260172	0.15937	0.207257	0.334796	0.154193	0.173868	0.581494	0.23174	0.32851	-0.0813725	0.313285

## Sheet: P_Value_devlopmental
	IQ	ASD	TS	Neuroticism	ADHD	OCD	ANO	PanicDisorder	BIP	MDD	SZes	SZgw	Epilepsy	AD	PD
Fetal.Astro	1.24385e-12	1.55029e-22	0.0568495	4.06102e-07	0.0345863	0.66087	0.000874672	0.00152598	0.0021069	1.11175e-05	0.000337605	9.45872e-14	0.000128231	0.999192	0.00402942
Fetal.Endo	4.09597e-13	2.89123e-20	0.0377323	3.44957e-06	0.0395101	0.678885	0.000135426	0.00127758	0.0521513	5.23005e-06	0.00207376	3.21651e-11	3.9996e-05	0.998097	5.49134e-05
Fetal.ExN	1.28871e-12	9.75784e-20	0.0515642	1.15836e-06	0.0657321	0.652014	0.00026182	0.00205768	0.025522	1.14189e-05	0.00375646	1.70267e-12	0.000926766	0.997736	0.000121746
Fetal.IPC	1.31626e-13	3.32851e-20	0.0327143	2.25853e-07	0.0429237	0.784319	4.95771e-05	0.00288301	0.00424535	1.66608e-06	0.00192073	7.39474e-13	0.000897575	0.990571	0.00246293
Fetal.IntN	2.8588e-13	8.71945e-20	0.0313804	1.34485e-07	0.0160439	0.368787	3.5001e-05	0.00451937	0.0269589	6.98029e-06	0.00142188	4.93924e-12	6.93892e-05	0.99952	0.000521395
Fetal.Microglia	1.23601e-08	3.05837e-21	0.102355	0.000703522	0.0563797	0.297643	0.00140587	0.0296298	0.0219794	0.00178713	0.0013369	6.32533e-09	0.000347019	0.975148	0.00739237
Fetal.NEP	1.78682e-10	3.76369e-18	0.083344	5.51859e-06	0.0173565	0.484069	1.57515e-05	0.00205265	0.0738511	9.31187e-05	0.0086275	6.86917e-11	0.00298294	0.999004	0.00527213
Fetal.OPC	5.73009e-18	3.70266e-23	0.0364347	1.3019e-06	0.00801939	0.620259	0.000250847	0.000934257	0.0108166	7.00311e-06	0.00169934	1.58365e-14	1.4098e-05	0.999904	0.000450043
Fetal.Oligo	1.95653e-08	6.58861e-16	0.14013	0.00256367	0.0905191	0.904665	0.000795016	0.0093422	0.031175	0.0190951	0.0106797	3.76436e-08	0.0289874	0.99463	0.0693809
Fetal.Per	3.78493e-12	1.78883e-20	0.0141899	4.04336e-07	0.0114201	0.487256	0.00040865	0.000692579	0.0128244	4.08031e-06	0.00685822	2.92591e-12	0.000550523	0.987026	8.09003e-05
Fetal.Trans	9.36686e-12	2.00105e-16	0.14673	5.8263e-06	0.0191071	0.590823	6.9448e-05	0.00397553	0.039705	8.80546e-06	0.00311811	2.05446e-10	0.00390907	0.997254	0.000596695
Fetal.quiescent	4.423e-19	1.04402e-23	0.0206357	4.12212e-06	0.0451114	0.438054	0.000211472	0.000755682	0.0157089	5.47702e-05	4.45236e-06	6.43888e-11	5.255e-05	1	0.00392875
Fetal.replicating	1.34481e-07	3.99206e-15	0.264112	0.0131305	0.0179483	0.52007	0.0699609	0.0030018	0.101828	0.0248654	6.23518e-05	8.58916e-06	0.00329537	1	0.0429192
Astro	2.67452e-10	5.65847e-11	0.271335	0.00125163	0.022581	0.624328	0.00181469	0.00543487	0.449357	1.59111e-05	0.000133265	1.00862e-05	1.51681e-05	1	0.00220331
Endo	1.42602e-05	1.71734e-10	0.396204	0.210633	0.316666	0.477522	0.00711067	0.0770756	0.432476	0.035782	0.00620269	0.0010612	0.00304228	0.999961	0.0059293
Microglia	1.77625e-05	1.49553e-10	0.0134081	0.0408327	0.160549	0.614329	0.00543909	0.1243	0.165906	0.00164146	0.0030522	0.00193346	0.00143626	0.918173	9.99458e-06
Neurons	2.77238e-13	6.54778e-18	0.173242	0.00352053	0.0882098	0.474977	0.000869293	0.000473318	0.0299799	0.000125712	3.50178e-06	6.17098e-11	2.74814e-09	1	5.17509e-05
OPC	4.06357e-05	9.38765e-15	0.311195	0.00857374	0.334554	0.148861	0.679505	0.226558	0.689847	0.000682352	2.7522e-06	0.00762334	0.00153024	1	6.53417e-06
Oligo	1.63294e-09	1.39841e-13	0.29215	0.0353079	0.0556853	0.371163	0.0429864	0.000709344	0.329049	0.00183957	3.54675e-05	2.34137e-07	4.18772e-05	0.999997	8.49254e-05
Ex1	1.29458e-32	4.37314e-58	0.000280006	3.59544e-16	0.00162357	0.0622756	0.0006969	0.0217451	6.54562e-05	7.21818e-15	1.19918e-08	2.21002e-26	8.23101e-11	0.999492	1.48611e-09
Ex2	4.97327e-32	4.35463e-55	0.000368458	9.21755e-17	0.000726884	0.055539	0.00689809	0.0486592	0.000353408	1.09763e-15	2.25185e-08	7.19603e-27	6.62735e-11	0.999769	9.69215e-10
Ex3	3.97764e-30	3.25529e-57	0.00090756	4.50136e-15	0.000185396	0.074674	0.00144123	0.0136869	7.01423e-05	4.50456e-15	8.78572e-09	3.34814e-24	1.64962e-12	0.999354	4.27803e-09
Ex4	2.32555e-33	1.91813e-58	7.52426e-05	3.25788e-16	0.000573397	0.326992	0.00500919	0.0295614	0.000126519	1.29832e-14	3.14555e-09	3.69149e-28	3.88568e-13	0.999346	2.96071e-09
Ex5	3.86908e-31	3.48731e-59	0.000125757	1.13619e-17	0.000304602	0.0720186	0.00561283	0.0473487	0.000185234	2.64067e-14	2.39318e-08	5.79509e-26	4.85367e-12	0.999451	1.24202e-09
Ex6	9.59882e-32	1.69833e-57	2.15444e-05	3.24528e-17	0.00328131	0.0227034	0.00182122	0.0658546	0.000113428	2.10085e-14	4.97666e-08	4.48806e-24	1.01587e-10	0.999581	1.45872e-09
Ex7	1.21687e-32	3.90676e-56	6.25412e-05	1.17286e-17	0.000753197	0.147934	0.000986118	0.0536377	3.80619e-05	8.10557e-14	2.24698e-08	3.80633e-27	3.37923e-11	0.999071	1.05558e-09
Ex8	1.71164e-31	1.24658e-54	9.9565e-05	1.32587e-16	0.000289458	0.277306	0.00103242	0.0492978	1.55186e-05	3.21231e-15	4.14701e-08	5.78898e-26	1.55092e-11	0.998855	2.98812e-10
In1	1.55229e-30	4.45463e-60	0.0172179	4.18138e-15	0.00650991	0.0235252	0.00185433	0.0010204	0.000104345	1.14714e-14	3.11721e-09	3.09259e-25	6.93518e-14	0.999968	6.68585e-09
In2	2.22487e-31	1.55726e-53	0.0151015	1.93693e-14	0.0102911	0.0289845	0.0017461	0.00451978	0.000281846	5.81523e-14	7.59835e-09	1.32116e-20	1.43521e-12	0.999823	6.88038e-09
In3	1.30316e-27	2.07233e-54	0.0213001	6.70731e-17	0.00106978	0.0402015	3.60419e-05	0.00582351	5.65844e-05	9.49067e-15	3.12224e-08	5.17659e-20	1.7933e-11	0.99565	4.90409e-10
In4	2.53223e-28	1.55807e-58	0.00666349	3.52911e-16	0.0227135	0.02225	0.00125449	0.000684224	0.000108297	1.28203e-14	3.68935e-09	8.34323e-23	5.72699e-12	0.999543	1.24448e-07
In5	3.31968e-28	1.36673e-57	0.00445417	1.02606e-15	0.0118966	0.0331858	0.000322502	0.00123644	5.67823e-05	3.90104e-14	2.78877e-08	9.2708e-21	4.11449e-13	0.999417	7.58633e-08
In6	1.29483e-28	6.56016e-57	0.00284533	4.06985e-16	0.0120407	0.121294	0.000493068	0.000189571	8.26445e-05	1.84994e-14	3.66547e-08	3.61473e-22	1.70443e-13	0.999675	3.4775e-08
In7	1.81106e-26	3.13184e-54	0.00921322	2.80959e-16	0.00989289	0.195529	0.0184631	0.00738284	1.45202e-05	3.29982e-14	4.92531e-08	2.93554e-22	5.48923e-12	0.999348	2.80061e-07
In8	4.13779e-26	4.68641e-59	0.00481677	5.90417e-16	0.0316654	0.0467778	0.00223283	0.000629401	0.000184331	3.29533e-13	3.0068e-08	2.47006e-22	5.88224e-14	0.999473	4.9968e-08

## Sheet: r_rank_biserial_adult
	ME_salmon	ME_lightcyan	ME_yellowgreen	ME_brown	ME_tan	ME_white	ME_darkturquoise	ME_darkolivegreen	ME_blue	ME_darkorange	ME_darkred	ME_yellow	ME_green	ME_darkgreen	ME_grey60	ME_turquoise
Astro	-0.333784	0.275749	0.404788	0.0983511	0.187221	-0.212724	-0.323707	-0.054309	0.148001	0.0695345	0.160946	-0.0148297	0.229063	0.210661	0.299615	0.222852
Endo	-0.016664	0.255872	0.166417	0.202581	0.1282	-0.243531	-0.266226	-0.000490902	0.175674	0.139982	0.107933	-0.0235622	0.248288	0.286371	0.107109	0.161533
Microglia	-0.207894	0.0860124	0.143795	-0.0302389	0.265268	-0.263085	-0.213042	-0.0166335	0.252922	0.229934	0.128971	-0.0252325	0.227825	0.330972	0.26277	0.203008
OPC	-0.351063	0.13711	0.316411	-0.0535039	0.213772	-0.158803	-0.227373	0.00942245	0.204749	0.232676	0.146517	-0.00644944	0.273289	0.322712	0.299204	0.241747
Oligo	-0.428144	0.0517591	0.110561	-0.125994	0.620031	-0.264326	-0.265532	-0.100488	0.220644	0.159031	0.188429	0.00184279	0.282295	0.269321	0.302443	0.248577
Per	-0.0882213	0.110214	0.18701	0.0888436	0.120872	-0.124348	-0.129661	0.012879	0.147234	0.187505	0.0433329	-0.00771728	0.117337	0.256978	0.157996	0.159849
Ex1	-0.425856	-0.131842	0.122888	-0.230063	-0.0857744	-0.295356	-0.238808	-0.084565	0.402866	0.329171	0.275445	-0.0810049	0.274536	0.33584	0.29279	0.220119
Ex2	-0.42807	-0.109938	0.110048	-0.214516	0.0351155	-0.268996	-0.190893	-0.0206024	0.376139	0.342198	0.216878	-0.0776361	0.287386	0.353669	0.269366	0.200865
Ex3e	-0.434354	-0.13822	0.147522	-0.197949	-0.0699496	-0.310819	-0.179511	-0.0243461	0.456605	0.34884	0.315962	-0.0973099	0.293057	0.353474	0.195389	0.190622
Ex4	-0.423119	-0.144299	0.0950933	-0.226689	-0.0701358	-0.308066	-0.207128	-0.0452356	0.403206	0.321009	0.264353	-0.0741763	0.294338	0.345395	0.279568	0.222596
Ex5b	-0.433466	-0.126969	0.101202	-0.226894	-0.0496622	-0.300249	-0.224584	-0.00922347	0.390422	0.325325	0.248397	-0.0738017	0.294938	0.374656	0.271394	0.209246
Ex6a	-0.415711	-0.0972217	0.195328	-0.211535	-0.0324978	-0.212395	-0.174954	-0.0291729	0.326213	0.314118	0.253774	-0.0713752	0.279155	0.388472	0.300469	0.214316
Ex6b	-0.4323	-0.097015	0.165789	-0.225487	-0.0182017	-0.247736	-0.210729	-0.00730037	0.36357	0.31233	0.263405	-0.0721512	0.282575	0.44929	0.309436	0.234352
Ex8	-0.403528	-0.109063	0.0607756	-0.225718	-0.0680456	-0.260088	-0.162642	-0.0253374	0.352711	0.307422	0.238476	-0.0540124	0.282196	0.341857	0.306802	0.221293
Ex9	-0.38044	-0.160176	0.120256	-0.15167	-0.104203	-0.361852	-0.163029	-0.035669	0.466575	0.303423	0.345954	-0.117774	0.316881	0.264501	0.0310088	0.12115
In1a	-0.392804	-0.0586921	0.231822	-0.17979	-0.0697331	-0.171015	-0.123537	-0.0123702	0.31087	0.341855	0.285419	-0.051204	0.273938	0.329042	0.295999	0.229329
In1b	-0.424134	-0.0672365	0.185647	-0.190815	0.0687948	-0.18167	-0.129157	0.00113551	0.306127	0.322209	0.261125	-0.059045	0.275257	0.352715	0.299803	0.228442
In1c	-0.393155	-0.0761201	0.21689	-0.185479	-0.0653102	-0.237207	-0.096449	0.0126121	0.323409	0.33818	0.272919	-0.0602902	0.283084	0.332011	0.294163	0.224322
In3	-0.416202	-0.0684245	0.198169	-0.191095	-0.0718038	-0.278651	-0.123891	-0.0117852	0.324784	0.342453	0.263133	-0.0631444	0.275183	0.328694	0.292354	0.217973
In4a	-0.397689	-0.0626096	0.200618	-0.184642	-0.0363441	-0.17101	-0.171506	-0.0421365	0.316101	0.337213	0.271376	-0.0519751	0.281797	0.320881	0.307643	0.232613
In4b	-0.406297	-0.0764207	0.177754	-0.190324	-0.0527531	-0.23923	-0.152635	-0.0281446	0.313277	0.309665	0.259815	-0.0545792	0.288287	0.315447	0.304155	0.231518
In6a	-0.38754	-0.0879425	0.204369	-0.18747	-0.0433259	-0.293946	-0.0855269	-0.124531	0.320402	0.309815	0.251039	-0.0550468	0.27833	0.270492	0.291025	0.21983
In6b	-0.427571	-0.0806223	0.134253	-0.195092	-0.0232073	-0.271944	-0.135434	-0.0712868	0.335782	0.326494	0.258798	-0.0593242	0.277487	0.29712	0.29446	0.223096
In7	-0.382845	-0.095792	0.194179	-0.202756	-0.0644168	-0.233172	-0.186745	-0.0194836	0.334903	0.336041	0.275252	-0.0685805	0.273393	0.323202	0.273946	0.221404
In8	-0.427617	-0.0808097	0.177562	-0.199257	0.00789628	-0.253892	-0.166138	-0.026604	0.331029	0.361031	0.269573	-0.0527175	0.295834	0.317563	0.30433	0.235499

## Sheet: P_Value_adult
	ME_salmon	ME_lightcyan	ME_yellowgreen	ME_brown	ME_tan	ME_white	ME_darkturquoise	ME_darkolivegreen	ME_blue	ME_darkorange	ME_darkred	ME_yellow	ME_green	ME_darkgreen	ME_grey60	ME_turquoise
Astro	1	4.11e-14	1.73e-07	8.02e-11	2.85e-09	0.999416	1	0.744576	2.41e-24	0.0750571	1.84e-05	0.794082	3.19e-34	3.04e-07	8.34e-12	5.45e-54
Endo	0.684637	2.12e-12	0.0180768	6.26e-40	3.32e-05	0.999899	1	0.502377	1.67e-33	0.00188227	0.00282562	0.903875	7.4e-40	5.95e-12	0.0080451	2.5e-29
Microglia	1	0.00990673	0.035073	0.975407	7.51e-17	0.99997	0.999998	0.579831	2.83e-67	9.65e-07	0.000470071	0.91877	6.75e-34	2.25e-15	1.75e-09	3.46e-45
OPC	1	0.000102543	3.4e-05	0.999748	1.45e-11	0.992317	1	0.454595	8.79e-45	7.34e-07	8.61e-05	0.63942	7.5e-48	1.07e-14	8.88e-12	3.69e-63
Oligo	1	0.0805268	0.081973	1	3.17e-83	0.999973	1	0.888123	1.14e-51	0.000498377	6.79e-07	0.459388	6.43e-51	9e-11	5.37e-12	1.17e-66
Per	0.997408	0.00052275	0.00485433	1.11e-10	1.81e-05	0.981449	0.998987	0.432013	1.08e-28	1.01e-05	0.111172	0.680517	4.2e-12	1.16e-11	4.82e-05	2.68e-34
Ex1	1	0.999822	0.060919	1	0.996193	0.999997	1	0.847039	3.88e-167	4.79e-12	8.2e-13	0.999996	2.86e-48	9.13e-16	2.37e-11	1e-52
Ex2	1	0.998544	0.0829558	1	0.137295	0.99998	0.999982	0.59849	5.38e-146	7.09e-13	1.34e-08	0.999991	1.08e-52	2.77e-17	7.12e-10	2.98e-44
Ex3e	1	0.999909	0.0316374	1	0.985237	0.999999	0.99995	0.615914	5e-214	2.6e-13	2.73e-16	1	1.03e-54	2.88e-17	5.65e-06	4.67e-40
Ex4	1	0.999953	0.115618	1	0.985451	0.999999	0.999996	0.70804	2.05e-167	1.53e-11	6.1e-12	0.99998	3.58e-55	1.43e-16	1.67e-10	7.17e-54
Ex5b	1	0.999707	0.101316	1	0.938846	0.999998	0.999999	0.544462	4.09e-157	8.3e-12	9.54e-11	0.999978	2.18e-55	3.6e-19	5.36e-10	7.6e-48
Ex6a	1	0.995766	0.00695987	1	0.844042	0.999406	0.999925	0.638043	2.13e-110	3.97e-11	3.83e-11	0.999961	7.59e-50	1.79e-20	7.28e-12	4.24e-50
Ex6b	1	0.995693	0.018434	1	0.714412	0.999922	0.999998	0.53522	1.49e-136	5.09e-11	7.22e-12	0.999967	5.15e-51	9.81e-27	1.79e-12	1.75e-59
Ex8	1	0.998429	0.222081	1	0.982882	0.999964	0.999788	0.620498	1.14e-128	9.89e-11	4.84e-10	0.998601	6.86e-51	2.85e-16	2.7e-12	2.84e-53
Ex9	1	0.999993	0.0648371	1	0.999413	1	0.999797	0.66722	8.85e-224	1.63e-10	3.4e-19	1	1.01e-63	1.82e-10	0.242768	2.35e-17
In1a	1	0.944126	0.00174675	1	0.98504	0.995497	0.996308	0.559571	1.39e-100	7.2e-13	1.21e-13	0.997713	3.92e-48	3.17e-15	1.41e-11	3.97e-57
In1b	1	0.96569	0.00970441	1	0.0161466	0.997223	0.99744	0.494521	1.68e-97	1.28e-11	1.07e-11	0.999458	1.58e-48	3.31e-17	8.04e-12	1.21e-56
In1c	1	0.98036	0.00316046	1	0.978928	0.999853	0.981699	0.439325	1.56e-108	1.29e-12	1.3e-12	0.999576	3.41e-51	1.89e-15	1.92e-11	1.11e-54
In3	1	0.968048	0.00629925	1	0.987262	0.999989	0.996372	0.556735	1.95e-109	6.81e-13	7.57e-12	0.999762	1.72e-48	3.53e-15	2.52e-11	9.59e-52
In4a	1	0.95516	0.00573085	1	0.871172	0.995507	0.999901	0.695209	5.49e-104	1.41e-12	1.64e-12	0.998007	7.61e-51	1.41e-14	2.26e-12	9.46e-59
In4b	1	0.980744	0.0126142	1	0.949638	0.999869	0.99953	0.633357	5.63e-102	7.32e-11	1.36e-11	0.998738	5.16e-53	4.02e-14	4.11e-12	4.18e-58
In6a	1	0.991404	0.00502213	1	0.911289	0.999996	0.96816	0.934283	1.14e-106	7.02e-11	5.98e-11	0.998848	1.32e-49	7.34e-11	3.02e-11	1.2e-52
In6b	1	0.985486	0.0454961	1	0.764872	0.999983	0.998332	0.805948	8.17e-117	7.03e-12	1.62e-11	0.999486	2.87e-49	9.91e-13	1.84e-11	4.19e-54
In7	1	0.995271	0.00722714	1	0.977527	0.999815	0.999974	0.593286	2.55e-116	1.72e-12	8.3e-13	0.999927	6.28e-48	9.53e-15	3.67e-10	2.3e-53
In8	1	0.985672	0.0126941	1	0.402967	0.999947	0.999841	0.626312	1.35e-113	3.94e-14	2.4e-12	0.998235	1.03e-55	2.74e-14	4e-12	4.8e-60
