# Supplementary material for: Spatiotemporal Brain Transcriptomics Reveal Risk Gene Hot-Spots in Major Neuropsychiatric Disorders
Source: Research Square preprint supplement (doi:10.21203/rs.3.rs-7667905/v1), 2025-10-08
Supplement: Supplementary file 12 [file Supplemental Table 8. Structures shared between AHBA and ENIGMA.xlsx]

## Sheet: Sheet1
X	structure_name	Structure	Structures shared between AHBA and ENIGMA	Structure_ENIGMA
AOrG	anterior orbital gyrus	Frontal_lobe
FP.s	frontal pole_superior aspect	Frontal_lobe	frontalpole	frontalpole
FPi	frontal pole_inferior aspect	Frontal_lobe	frontalpole	frontalpole
FPm	frontal pole_medial aspect	Frontal_lobe	frontalpole	frontalpole
GRe	gyrus rectus	Frontal_lobe
LOrG	lateral orbital gyrus	Frontal_lobe	lateralorbitofrontal	lateralorbitofrontal
MFG.i	middle frontal gyrus_inferior bank of gyrus	Frontal_lobe	middlefrontal	caudalmiddlefrontal / rostralmiddlefrontal
MFG.s	middle frontal gyrus_superior bank of gyrus	Frontal_lobe	middlefrontal	caudalmiddlefrontal / rostralmiddlefrontal
MOrG	medial orbital gyrus	Frontal_lobe	medialorbitofrontal	medialorbitofrontal
PCLa	paracentral lobule_anterior part	Frontal_lobe
PCLa.i	paracentral lobule_anterior part_inferior bank of gyrus	Frontal_lobe	paracentral	paracentral
PCLa.s	paracentral lobule_anterior part_superior bank of gyrus	Frontal_lobe	paracentral	paracentral
PCLp.cs	paracentral lobule_posterior part_bank of cingulate sulcus	Frontal_lobe	paracentral	paracentral
PCLp.l	paracentral lobule_posterior part_lateral bank of gyrus	Frontal_lobe	paracentral	paracentral
POrG	posterior orbital gyrus	Frontal_lobe
PTG	paraterminal gyrus	Frontal_lobe
PaOG	parolfactory gyri	Frontal_lobe
PrG.cs	precentral gyrus_bank of the central sulcus	Frontal_lobe	precentral	precentral
PrG.il	precentral gyrus_inferior lateral aspect of gyrus	Frontal_lobe	precentral	precentral
PrG.prc	precentral gyrus_bank of the precentral sulcus	Frontal_lobe	precentral	precentral
PrG.sl	precentral gyrus_superior lateral aspect of gyrus	Frontal_lobe	precentral	precentral
SFG	superior frontal gyrus	Frontal_lobe	superiorfrontal	superiorfrontal
SFG.l	superior frontal gyrus_lateral bank of gyrus	Frontal_lobe	superiorfrontal	superiorfrontal
SFG.m	superior frontal gyrus_medial bank of gyrus	Frontal_lobe	superiorfrontal	superiorfrontal
SRoG	superior rostral gyrus	Frontal_lobe
opIFG	inferior frontal gyrus_opercular part	Frontal_lobe	parsopercularis	parsopercularis
orIFG	inferior frontal gyrus_orbital part	Frontal_lobe	parsorbitalis	parsorbitalis
trIFG	inferior frontal gyrus_triangular part	Frontal_lobe	parstriangularis	parstriangularis
IRoG	inferior rostral gyrus	Frontal_lobe
fro	frontal operculum	Frontal_lobe	frontalpole	frontalpole
AnG.i	angular gyrus_inferior bank of gyrus	Parietal_lobe	inferiorparietal	inferiorparietal
AnG.s	angular gyrus_superior bank of gyrus	Parietal_lobe	inferiorparietal	inferiorparietal
Pcu.i	precuneus_inferior lateral bank of gyrus	Parietal_lobe	precuneus	precuneus
Pcu.s	precuneus_superior lateral bank of gyrus	Parietal_lobe	precuneus	precuneus
PoG.cs	postcentral gyrus_bank of the central sulcus	Parietal_lobe	postcentral	postcentral
PoG.il	postcentral gyrus_inferior lateral aspect of gyrus	Parietal_lobe	postcentral	postcentral
PoG.pcs	postcentral gyrus_bank of the posterior central sulcus	Parietal_lobe	postcentral	postcentral
PoG.sl	postcentral gyrus_superior lateral aspect of gyrus	Parietal_lobe	postcentral	postcentral
SMG.i	supramarginal gyrus_inferior bank of gyrus	Parietal_lobe	supramarginal	supramarginal
SMG.s	supramarginal gyrus_superior bank of gyrus	Parietal_lobe	supramarginal	supramarginal
SPL.i	superior parietal lobule_inferior bank of gyrus	Parietal_lobe	superiorparietal	superiorparietal
SPL.s	superior parietal lobule_superior bank of gyrus	Parietal_lobe	superiorparietal	superiorparietal
PLP	planum polare	Temporal_lobe
PLT	planum temporale	Temporal_lobe	bankssts	bankssts
FuG.cos	fusiform gyrus_bank of cos	Temporal_lobe	fusiform	fusiform
FuG.its	fusiform gyrus_bank of the its	Temporal_lobe	fusiform	fusiform
FuG.l	fusiform gyrus_lateral bank of gyrus	Temporal_lobe	fusiform	fusiform
HG	Heschls gyrus	Temporal_lobe	transversetemporal	transversetemporal
ITG.its	inferior temporal gyrus_bank of the its	Temporal_lobe	inferiortemporal	inferiortemporal
ITG.l	inferior temporal gyrus_lateral bank of gyrus	Temporal_lobe	inferiortemporal	inferiortemporal
ITG.mts	inferior temporal gyrus_bank of mts	Temporal_lobe	inferiortemporal	inferiortemporal
MTG.i	middle temporal gyrus_inferior bank of gyrus	Temporal_lobe	middletemporal	middletemporal
MTG.s	middle temporal gyrus_superior bank of gyrus	Temporal_lobe	middletemporal	middletemporal
STG.i	superior temporal gyrus_inferior bank of gyrus	Temporal_lobe	superiortemporal	superiortemporal
STG.l	superior temporal gyrus_lateral bank of gyrus	Temporal_lobe	superiortemporal	superiortemporal
TG	transverse gyri	Temporal_lobe	transversetemporal	transversetemporal
TP.i	temporal pole_inferior aspect	Temporal_lobe	temporalpole	temporalpole
TP.m	temporal pole_medial aspect	Temporal_lobe	temporalpole	temporalpole
TP.s	temporal pole_superior aspect	Temporal_lobe	temporalpole	temporalpole
PHG.cos	parahippocampal gyrus_bank of the cos	Limbic_lobe	parahippocampal	parahippocampal
PHG.l	parahippocampal gyrus_lateral bank of gyrus	Limbic_lobe	parahippocampal	parahippocampal
Pir	piriform cortex	Limbic_lobe
Cun.pest	cuneus_peristriate	Occipital_lobe	cuneus	cuneus
Cun.str	cuneus_striate	Occipital_lobe	cuneus	cuneus
IOG.i	inferior occipital gyrus_inferior bank of gyrus	Occipital_lobe	lateraloccipital	lateraloccipital
IOG.s	inferior occipital gyrus_superior bank of gyrus	Occipital_lobe	lateraloccipital	lateraloccipital
LiG.pest	lingual gyrus_peristriate	Occipital_lobe	lingual	lingual
LiG.str	lingual gyrus_striate	Occipital_lobe	lingual	lingual
OPi	occipital pole_inferior aspect	Occipital_lobe	lateraloccipital	lateraloccipital
OPl	occipital pole_lateral aspect	Occipital_lobe	lateraloccipital	lateraloccipital
OPs	occipital pole_superior aspect	Occipital_lobe	lateraloccipital	lateraloccipital
OTG.i	occipito-temporal gyrus_inferior bank of gyrus	Occipital_lobe
OTG.s	occipito-temporal gyrus_superior bank of gyrus	Occipital_lobe
SOG.i	superior occipital gyrus_inferior bank of gyrus	Occipital_lobe	lateraloccipital	lateraloccipital
SOG.s	superior occipital gyrus_superior bank of gyrus	Occipital_lobe	lateraloccipital	lateraloccipital
LIG	long insular gyri	Insula	insula	insula
SIG	short insular gyri	Insula	insula	insula
CgGf.i	cingulate gyrus_frontal part_inferior bank of gyrus	Cingulate_gyrus	anteriorcingulate	caudalanteriorcingulate / rostralanteriorcingulate
CgGf.s	cingulate gyrus_frontal part_superior bank of gyrus	Cingulate_gyrus	anteriorcingulate	caudalanteriorcingulate / rostralanteriorcingulate
CgGp.i	cingulate gyrus_parietal part_inferior bank of gyrus	Cingulate_gyrus	posteriorcingulate	posteriorcingulate
CgGp.s	cingulate gyrus_parietal part_superior bank of gyrus	Cingulate_gyrus	posteriorcingulate	posteriorcingulate
CgGr.i	cingulate gyrus_retrosplenial part_inferior bank of gyrus	Cingulate_gyrus	isthmuscingulate	isthmuscingulate
CgGr.s	cingulate gyrus_retrosplenial part_superior bank of gyrus	Cingulate_gyrus	isthmuscingulate	isthmuscingulate
SCG	subcallosal cingulate gyrus	Cingulate_gyrus
BST	bed nucleus of stria terminalis	Basal_forbrain
DBh	nucleus of the diagonal band_vertical division	Basal_forbrain
DBv	nucleus of the diagonal band_horizontal division	Basal_forbrain
OlfT	olfactory tubercle	Basal_forbrain
SptN	septal nuclei	Basal_forbrain
nbM	basal nucleus of meynert	Basal_forbrain
Acb	nucleus accumbens	Basal_ganglia	accumb	accumb
BCd	body of the caudate nucleus	Basal_ganglia	caud	caud
GPe	globus pallidus_external segment	Basal_ganglia	pal	pal
GPi	globus pallidus_internal segment	Basal_ganglia	pal	pal
HCd	head of the caudate nucleus	Basal_ganglia	caud	caud
Pu	putamen	Basal_ganglia	put	put
TCd	tail of the caudate nucleus	Basal_ganglia	caud	caud
Cl	claustrum	Claustrum
ATZ	amygdalohippocampal transition zone	Amygdala	amyg	amyg
BLA	basolateral nucleus	Amygdala	amyg	amyg
BMA	basomedial nucleus	Amygdala	amyg	amyg
CeA	central nucleus	Amygdala	amyg	amyg
LA	lateral nucleus	Amygdala	amyg	amyg
COMA	cortico-medial group	Amygdala	amyg	amyg
CA1	CA1 field	Hippocampus	hippo	hippo
CA2	CA2 field	Hippocampus	hippo	hippo
CA3	CA3 field	Hippocampus	hippo	hippo
CA4	CA4 field	Hippocampus	hippo	hippo
DG	dentate gyrus	Hippocampus	hippo	hippo
S	subiculum	Hippocampus
Hl	lateral habenular nucleus	Thalamus
Hm	medial habenular nucleus	Thalamus
PIN	pineal gland	Thalamus
DTA	anterior group of nuclei	Thalamus	thal	thal
DTLd	lateral group of nuclei_dorsal division	Thalamus	thal	thal
DTLv	lateral group of nuclei_ventral division	Thalamus	thal	thal
DTM	medial group of nuclei	Thalamus	thal	thal
DTP	posterior group of nuclei	Thalamus	thal	thal
ILc	caudal group of intralaminar nuclei	Thalamus
ILr	rostral group of intralaminar nuclei	Thalamus
LGd	dorsal lateral geneiculate nucleus	Thalamus	thal	thal
MG	medial geniculate complex	Thalamus
Pa	paraventricular nuclei of thalamus	Thalamus	thal	thal
R	reticular nucleus of thalamus	Thalamus	thal	thal
SI	substantia innominata	Thalamus
ZI	zona incerta	Thalamus
AHA	anterior hypothalamic area	Hypothalamus
ARH	arcuate nucleus of the hypothalamus	Hypothalamus
DMH	dorsomedial hypothalamic nucleus	Hypothalamus
LHA	lateral hypothalamic area_anterior region	Hypothalamus
LHM	lateral hypothalamic area_mammillary region	Hypothalamus
LHT	lateral hypothalamic area_tuberal region	Hypothalamus
LM	lateral mammillary nucleus	Hypothalamus
LTu	lateral tuberal nucleus	Hypothalamus
MB	mammillary body	Hypothalamus
MM	medial mammillary nucleus	Hypothalamus
PHA	posterior hypothalamic area	Hypothalamus
PalHy	pallidohypothalamic nucleus	Hypothalamus
PeF	perifornical nucleus	Hypothalamus
PrOR	preoptic region	Hypothalamus
SO	supraoptic nucleus	Hypothalamus
SuM	supramammillary nucleus	Hypothalamus
TM	tuberomammillary nucleus	Hypothalamus
VMH	ventromedial hypothalamic nucleus	Hypothalamus
Sb	subthalamic nucleus	Hypothalamus
CGMB	central gray substance of midbrain	Midbrain
CnF	cuneiform nucleus	Midbrain
Dk	nucleus of Darkschewitsch	Midbrain
EW	Edinger-Westphal nucleus	Midbrain
IC	inferior colliculus	Midbrain
ICjl	interstitial nucleus of Cajal	Midbrain
MBRF	midbrain reticular formation	Midbrain
MBRa	midbrain raphe nuclei	Midbrain
PTec	pretectal region	Midbrain
RN	red nucleus	Midbrain
SC	superior colliculus	Midbrain
VTA	ventral tegmental area	Midbrain
SNC	substantia nigra_pars compacta	Midbrain
SNR	substantia nigra_pars reticulata	Midbrain
CGPo	central gray of the pons	Pons
LC	locus ceruleus	Pons
LPB	lateral parabrachial nucleus	Pons
MPB	medial parabrachial nucleus	Pons
Mo5	motor nucleus of trigeminal nerve	Pons
PRF	pontine reticular formation	Pons
Pn	paranigral nucleus	Pons
Pr5	principal sensory nucleus of trigeminal nerve	Pons
RPn	pontine raphe nucleus	Pons
SubC	nucleus subceruleus	Pons
SubCn	subcuneiform nucleus	Pons
Arc	arcuate nucleus of medulla	Medulla
CGS	central glial substance	Medulla
CMRt	central medullary reticular group	Medulla
Cu	cuneate nucleus	Medulla
GiRt	gigantocellular group	Medulla
Gr	gracile nucleus	Medulla
IO	inferior olivary complex	Medulla
LMRt	lateral medullary reticular group	Medulla
RaM	raphe nuclei of medulla	Medulla
SOC	superior olivary complex	Medulla
Sp5	spinal trigeminal nucleus	Medulla
Dt	dorsal thalamus	Cerebellum
Emb	emboliform nucleus	Cerebellum
Fas	fastigial nucleus	Cerebellum
Glo	globose nucleus	Cerebellum
He.Crus.I	Crus I_lateral hemisphere	Cerebellum
He.Crus.II	Crus II_lateral hemisphere	Cerebellum
He.III	III_lateral hemisphere	Cerebellum
He.IV	IV_lateral hemisphere	Cerebellum
He.IX	IX_lateral hemisphere	Cerebellum
He.V	V_lateral hemisphere	Cerebellum
He.VI	VI_lateral hemisphere	Cerebellum
He.VIIB	VIIB_lateral hemisphere	Cerebellum
He.VIIIA	VIIIA_lateral hemisphere	Cerebellum
He.VIIIB	VIIIB_lateral hemisphere	Cerebellum
He.X	X_lateral hemisphere	Cerebellum
PV.Crus.I	Crus I_paravermis	Cerebellum
PV.Crus.II	Crus II_paravermis	Cerebellum
PV.III	III_paravermis	Cerebellum
PV.IV	IV_paravermis	Cerebellum
PV.IX	IX_paravermis	Cerebellum
PV.V	V_paravermis	Cerebellum
PV.VI	VI_paravermis	Cerebellum
PV.VIIB	VIIB_paravermis	Cerebellum
PV.VIIIA	VIIIA_paravermis	Cerebellum
PV.VIIIB	VIIIB_paravermis	Cerebellum
PV.X	X_paravermis	Cerebellum
PVH	paraventricular nucleus of the hypothalamus	Cerebellum
Ve.I.II	I-II	Cerebellum
Ve.III	III	Cerebellum
Ve.IV	IV	Cerebellum
Ve.IX	IX	Cerebellum
Ve.V	V	Cerebellum
Ve.VI	VI	Cerebellum
Ve.VIIAf	VIIAf	Cerebellum
Ve.VIIAt	VIIAt	Cerebellum
Ve.VIIB	VIIB	Cerebellum
Ve.VIIIA	VIIIA	Cerebellum
Ve.VIIIB	VIIIB	Cerebellum
Ve.X	X	Cerebellum
cc	corpus callosum	White_matter
cgb	cingulum bundle	White_matter
CPLV	choroid plexus of the lateral ventricle	Lateral_ventrical	LatVent	LatVent
X10	dorsal motor nucleus of the vagus	Cranial_nerves
X12	hypoglossal nucleus	Cranial_nerves
X3	oculomotor nuclear complex	Cranial_nerves
X4	trochlear nucleus	Cranial_nerves
X6	abducens nucleus	Cranial_nerves
X7	facial motor nucleus	Cranial_nerves
8Co	cochlear nuclei	Cranial_nerves
8Ve	vestibular nuclei	Cranial_nerves
