# Supplementary material for: Spatiotemporal Brain Transcriptomics Reveal Risk Gene Hot-Spots in Major Neuropsychiatric Disorders
Source: Research Square preprint supplement (doi:10.21203/rs.3.rs-7667905/v1), 2025-10-08
Supplement: Supplementary file 13 [file Supplemental Table 9. Data supporting Fig. 5, Visualization of the spatial enrichment patterns of the 15 risk gene sets.xlsx]

## Sheet: enigma_pyth
index	IQ	ASD	TS	Neuroticism	ADHD	OCD	ANO	PanicDisorder	BIP	MDD	SZes	SZgw	Epilepsy	AD	PD
L_bankssts	0.248148	0.441543	0.130071	0.14045	0.485658	0.00949642	0.229382	0.273007	0.136331	0.136218	0.319356	0.227795	0.215615	0.0710118	0.296652
L_caudalanteriorcingulate	0.245062	0.426199	0.122066	0.136875	0.472385	0.013557	0.240559	0.258058	0.135551	0.133738	0.29588	0.226515	0.211342	0.0794513	0.297474
L_caudalmiddlefrontal	0.250074	0.432913	0.123223	0.139285	0.485535	-0.00451463	0.237909	0.266864	0.139209	0.133329	0.308739	0.228134	0.216258	0.0757319	0.291872
L_cuneus	0.256989	0.441709	0.130744	0.136493	0.490776	0.0101005	0.248673	0.272294	0.140575	0.138856	0.331532	0.234106	0.206022	0.0740031	0.292885
L_entorhinal	NA	NA	NA	NA	NA	NA	NA	NA	NA	NA	NA	NA	NA	NA	NA
L_fusiform	0.248949	0.43464	0.126969	0.139965	0.482133	0.00333328	0.242093	0.266157	0.137493	0.13378	0.303361	0.229011	0.213384	0.0744145	0.297165
L_inferiorparietal	0.251397	0.440138	0.126535	0.138049	0.486941	-0.00308694	0.239955	0.267891	0.138459	0.134875	0.321094	0.229989	0.216749	0.0748436	0.294795
L_inferiortemporal	0.248421	0.436895	0.126994	0.139617	0.484329	0.00393134	0.236381	0.265042	0.136754	0.133883	0.309084	0.228458	0.214741	0.0731899	0.296296
L_isthmuscingulate	0.24436	0.421822	0.119432	0.132152	0.472754	0.000683638	0.237392	0.249452	0.135762	0.131945	0.296983	0.226428	0.21314	0.0819077	0.293827
L_lateraloccipital	0.253964	0.434067	0.124613	0.136697	0.491055	-0.00242186	0.247705	0.271485	0.141968	0.135958	0.324087	0.232059	0.206823	0.0772128	0.294186
L_lateralorbitofrontal	0.249634	0.434172	0.124028	0.138656	0.484476	0.00174786	0.234317	0.265566	0.137139	0.134452	0.315293	0.228689	0.212777	0.074696	0.296922
L_lingual	0.253818	0.445297	0.131892	0.136139	0.48907	0.0125391	0.240251	0.271287	0.139332	0.138345	0.337022	0.233274	0.209246	0.0735946	0.292347
L_medialorbitofrontal	0.249766	0.43071	0.120985	0.139348	0.481036	0.00129277	0.244312	0.261768	0.13916	0.132858	0.303724	0.229347	0.210212	0.0761892	0.295
L_middletemporal	0.249509	0.438746	0.125608	0.139153	0.486166	-0.000714849	0.236708	0.265262	0.138332	0.133966	0.312241	0.229179	0.21552	0.0735446	0.294774
L_parahippocampal	0.244598	0.433507	0.130044	0.141592	0.476343	0.0142396	0.232446	0.25954	0.133951	0.135323	0.297548	0.225574	0.213962	0.0759668	0.29629
L_paracentral	0.248435	0.436325	0.130129	0.13653	0.477595	0.00026832	0.2278	0.269407	0.139481	0.134876	0.315832	0.225783	0.218512	0.0693585	0.294154
L_parsopercularis	0.247738	0.431285	0.12129	0.137347	0.48643	0.00691894	0.238398	0.263964	0.140189	0.133994	0.306076	0.228055	0.211162	0.0773484	0.294809
L_parsorbitalis	0.249729	0.432857	0.124287	0.138935	0.488599	0.0020197	0.238852	0.263747	0.139257	0.133723	0.309683	0.228646	0.213835	0.0760629	0.297055
L_parstriangularis	0.249517	0.426884	0.119961	0.13727	0.479253	-0.00851174	0.239891	0.259154	0.138585	0.13248	0.305699	0.227192	0.212405	0.0794725	0.291441
L_pericalcarine	NA	NA	NA	NA	NA	NA	NA	NA	NA	NA	NA	NA	NA	NA	NA
L_postcentral	0.248701	0.43412	0.123831	0.136124	0.482817	0.00462085	0.237213	0.272433	0.138106	0.13515	0.315526	0.227994	0.213655	0.0764346	0.292516
L_posteriorcingulate	0.248447	0.439524	0.130066	0.137954	0.485697	0.0060138	0.232521	0.26247	0.13934	0.135133	0.319454	0.229476	0.216981	0.0720952	0.296329
L_precentral	0.24744	0.428629	0.124259	0.135479	0.480298	0.00489546	0.229386	0.265509	0.136728	0.133191	0.308092	0.226297	0.215497	0.0741321	0.293168
L_precuneus	0.251709	0.440049	0.127235	0.137801	0.49217	0.00683336	0.238263	0.264934	0.137331	0.136946	0.324096	0.231757	0.212758	0.0717178	0.295211
L_rostralanteriorcingulate	0.245062	0.426199	0.122066	0.136875	0.472385	0.013557	0.240559	0.258058	0.135551	0.133738	0.29588	0.226515	0.211342	0.0794513	0.297474
L_rostralmiddlefrontal	0.250074	0.432913	0.123223	0.139285	0.485535	-0.00451463	0.237909	0.266864	0.139209	0.133329	0.308739	0.228134	0.216258	0.0757319	0.291872
L_superiorfrontal	0.251683	0.433536	0.1247	0.138832	0.487344	-0.0014985	0.240142	0.257619	0.138498	0.134225	0.310112	0.229859	0.212325	0.0730146	0.296655
L_superiorparietal	0.251755	0.434946	0.126442	0.138434	0.490612	0.00679258	0.239798	0.267075	0.137519	0.137267	0.317345	0.230619	0.2117	0.0748813	0.296587
L_superiortemporal	0.249004	0.435498	0.126284	0.13842	0.481473	0.00086084	0.237964	0.264328	0.137742	0.134415	0.312812	0.229052	0.213339	0.0742298	0.295284
L_supramarginal	0.249741	0.439405	0.126412	0.138577	0.485274	-0.00224322	0.234563	0.267467	0.139351	0.13629	0.317985	0.229984	0.213226	0.0728087	0.297755
L_frontalpole	0.247839	0.427827	0.117551	0.137265	0.482658	-0.003906	0.247017	0.266457	0.137021	0.130747	0.304285	0.225849	0.214942	0.0819337	0.292075
L_temporalpole	0.246127	0.42902	0.119998	0.139825	0.477949	0.0115175	0.248405	0.266551	0.137804	0.133572	0.292259	0.227615	0.210032	0.0784148	0.294929
L_transversetemporal	0.251848	0.440214	0.128029	0.139462	0.486464	0.00851577	0.234107	0.268441	0.136714	0.137407	0.319705	0.230041	0.212397	0.072709	0.296422
L_insula	0.249398	0.435724	0.124749	0.139764	0.482415	0.00809391	0.241788	0.261488	0.137888	0.134628	0.30162	0.228546	0.211157	0.0747761	0.298394
R_bankssts	0.248148	0.441543	0.130071	0.14045	0.485658	0.00949642	0.229382	0.273007	0.136331	0.136218	0.319356	0.227795	0.215615	0.0710118	0.296652
R_caudalanteriorcingulate	0.245062	0.426199	0.122066	0.136875	0.472385	0.013557	0.240559	0.258058	0.135551	0.133738	0.29588	0.226515	0.211342	0.0794513	0.297474
R_caudalmiddlefrontal	0.250074	0.432913	0.123223	0.139285	0.485535	-0.00451463	0.237909	0.266864	0.139209	0.133329	0.308739	0.228134	0.216258	0.0757319	0.291872
R_cuneus	0.256989	0.441709	0.130744	0.136493	0.490776	0.0101005	0.248673	0.272294	0.140575	0.138856	0.331532	0.234106	0.206022	0.0740031	0.292885
R_entorhinal	NA	NA	NA	NA	NA	NA	NA	NA	NA	NA	NA	NA	NA	NA	NA
R_fusiform	0.248949	0.43464	0.126969	0.139965	0.482133	0.00333328	0.242093	0.266157	0.137493	0.13378	0.303361	0.229011	0.213384	0.0744145	0.297165
R_inferiorparietal	0.251397	0.440138	0.126535	0.138049	0.486941	-0.00308694	0.239955	0.267891	0.138459	0.134875	0.321094	0.229989	0.216749	0.0748436	0.294795
R_inferiortemporal	0.248421	0.436895	0.126994	0.139617	0.484329	0.00393134	0.236381	0.265042	0.136754	0.133883	0.309084	0.228458	0.214741	0.0731899	0.296296
R_isthmuscingulate	0.24436	0.421822	0.119432	0.132152	0.472754	0.000683638	0.237392	0.249452	0.135762	0.131945	0.296983	0.226428	0.21314	0.0819077	0.293827
R_lateraloccipital	0.253964	0.434067	0.124613	0.136697	0.491055	-0.00242186	0.247705	0.271485	0.141968	0.135958	0.324087	0.232059	0.206823	0.0772128	0.294186
R_lateralorbitofrontal	0.249634	0.434172	0.124028	0.138656	0.484476	0.00174786	0.234317	0.265566	0.137139	0.134452	0.315293	0.228689	0.212777	0.074696	0.296922
R_lingual	0.253818	0.445297	0.131892	0.136139	0.48907	0.0125391	0.240251	0.271287	0.139332	0.138345	0.337022	0.233274	0.209246	0.0735946	0.292347
R_medialorbitofrontal	0.249766	0.43071	0.120985	0.139348	0.481036	0.00129277	0.244312	0.261768	0.13916	0.132858	0.303724	0.229347	0.210212	0.0761892	0.295
R_middletemporal	0.249509	0.438746	0.125608	0.139153	0.486166	-0.000714849	0.236708	0.265262	0.138332	0.133966	0.312241	0.229179	0.21552	0.0735446	0.294774
R_parahippocampal	0.244598	0.433507	0.130044	0.141592	0.476343	0.0142396	0.232446	0.25954	0.133951	0.135323	0.297548	0.225574	0.213962	0.0759668	0.29629
R_paracentral	0.248435	0.436325	0.130129	0.13653	0.477595	0.00026832	0.2278	0.269407	0.139481	0.134876	0.315832	0.225783	0.218512	0.0693585	0.294154
R_parsopercularis	0.247738	0.431285	0.12129	0.137347	0.48643	0.00691894	0.238398	0.263964	0.140189	0.133994	0.306076	0.228055	0.211162	0.0773484	0.294809
R_parsorbitalis	0.249729	0.432857	0.124287	0.138935	0.488599	0.0020197	0.238852	0.263747	0.139257	0.133723	0.309683	0.228646	0.213835	0.0760629	0.297055
R_parstriangularis	0.249517	0.426884	0.119961	0.13727	0.479253	-0.00851174	0.239891	0.259154	0.138585	0.13248	0.305699	0.227192	0.212405	0.0794725	0.291441
R_pericalcarine	NA	NA	NA	NA	NA	NA	NA	NA	NA	NA	NA	NA	NA	NA	NA
R_postcentral	0.248701	0.43412	0.123831	0.136124	0.482817	0.00462085	0.237213	0.272433	0.138106	0.13515	0.315526	0.227994	0.213655	0.0764346	0.292516
R_posteriorcingulate	0.248447	0.439524	0.130066	0.137954	0.485697	0.0060138	0.232521	0.26247	0.13934	0.135133	0.319454	0.229476	0.216981	0.0720952	0.296329
R_precentral	0.24744	0.428629	0.124259	0.135479	0.480298	0.00489546	0.229386	0.265509	0.136728	0.133191	0.308092	0.226297	0.215497	0.0741321	0.293168
R_precuneus	0.251709	0.440049	0.127235	0.137801	0.49217	0.00683336	0.238263	0.264934	0.137331	0.136946	0.324096	0.231757	0.212758	0.0717178	0.295211
R_rostralanteriorcingulate	0.245062	0.426199	0.122066	0.136875	0.472385	0.013557	0.240559	0.258058	0.135551	0.133738	0.29588	0.226515	0.211342	0.0794513	0.297474
R_rostralmiddlefrontal	0.250074	0.432913	0.123223	0.139285	0.485535	-0.00451463	0.237909	0.266864	0.139209	0.133329	0.308739	0.228134	0.216258	0.0757319	0.291872
R_superiorfrontal	0.251683	0.433536	0.1247	0.138832	0.487344	-0.0014985	0.240142	0.257619	0.138498	0.134225	0.310112	0.229859	0.212325	0.0730146	0.296655
R_superiorparietal	0.251755	0.434946	0.126442	0.138434	0.490612	0.00679258	0.239798	0.267075	0.137519	0.137267	0.317345	0.230619	0.2117	0.0748813	0.296587
R_superiortemporal	0.249004	0.435498	0.126284	0.13842	0.481473	0.00086084	0.237964	0.264328	0.137742	0.134415	0.312812	0.229052	0.213339	0.0742298	0.295284
R_supramarginal	0.249741	0.439405	0.126412	0.138577	0.485274	-0.00224322	0.234563	0.267467	0.139351	0.13629	0.317985	0.229984	0.213226	0.0728087	0.297755
R_frontalpole	0.247839	0.427827	0.117551	0.137265	0.482658	-0.003906	0.247017	0.266457	0.137021	0.130747	0.304285	0.225849	0.214942	0.0819337	0.292075
R_temporalpole	0.246127	0.42902	0.119998	0.139825	0.477949	0.0115175	0.248405	0.266551	0.137804	0.133572	0.292259	0.227615	0.210032	0.0784148	0.294929
R_transversetemporal	0.251848	0.440214	0.128029	0.139462	0.486464	0.00851577	0.234107	0.268441	0.136714	0.137407	0.319705	0.230041	0.212397	0.072709	0.296422
R_insula	0.249398	0.435724	0.124749	0.139764	0.482415	0.00809391	0.241788	0.261488	0.137888	0.134628	0.30162	0.228546	0.211157	0.0747761	0.298394
Laccumb	0.226613	0.410391	0.10402	0.129613	0.458188	0.0322568	0.211759	0.252459	0.122983	0.129575	0.270409	0.212361	0.189593	0.070358	0.261735
Lamyg	0.232681	0.424209	0.118409	0.13269	0.428476	0.0132106	0.216358	0.26148	0.126997	0.126826	0.290583	0.213482	0.217601	0.0743496	0.286923
Lcaud	0.227814	0.405909	0.107874	0.124769	0.451005	0.0203178	0.187528	0.24156	0.127584	0.123439	0.27847	0.215963	0.193888	0.0783254	0.253747
Lhippo	0.241574	0.436825	0.13627	0.124059	0.395669	-0.0271361	0.211566	0.227592	0.139201	0.120387	0.336261	0.215037	0.227039	0.0630258	0.284939
Lpal	0.20631	0.342734	0.098059	0.119509	0.412378	0.0115151	0.18561	0.246095	0.0962785	0.120137	0.237371	0.190642	0.169169	0.0926624	0.275392
Lput	0.230657	0.405965	0.108189	0.124845	0.454474	0.0310547	0.190347	0.238026	0.124022	0.126352	0.278158	0.218391	0.185073	0.0764428	0.253076
Lthal	0.21711	0.379387	0.104671	0.125912	0.423756	-0.000985435	0.207795	0.222212	0.108713	0.122657	0.260086	0.194236	0.19393	0.0860806	0.291583
LLatVent	NA	NA	NA	NA	NA	NA	NA	NA	NA	NA	NA	NA	NA	NA	NA
Raccumb	0.226613	0.410391	0.10402	0.129613	0.458188	0.0322568	0.211759	0.252459	0.122983	0.129575	0.270409	0.212361	0.189593	0.070358	0.261735
Ramyg	0.232681	0.424209	0.118409	0.13269	0.428476	0.0132106	0.216358	0.26148	0.126997	0.126826	0.290583	0.213482	0.217601	0.0743496	0.286923
Rcaud	0.227814	0.405909	0.107874	0.124769	0.451005	0.0203178	0.187528	0.24156	0.127584	0.123439	0.27847	0.215963	0.193888	0.0783254	0.253747
Rhippo	0.241574	0.436825	0.13627	0.124059	0.395669	-0.0271361	0.211566	0.227592	0.139201	0.120387	0.336261	0.215037	0.227039	0.0630258	0.284939
Rpal	0.20631	0.342734	0.098059	0.119509	0.412378	0.0115151	0.18561	0.246095	0.0962785	0.120137	0.237371	0.190642	0.169169	0.0926624	0.275392
Rput	0.230657	0.405965	0.108189	0.124845	0.454474	0.0310547	0.190347	0.238026	0.124022	0.126352	0.278158	0.218391	0.185073	0.0764428	0.253076
Rthal	0.21711	0.379387	0.104671	0.125912	0.423756	-0.000985435	0.207795	0.222212	0.108713	0.122657	0.260086	0.194236	0.19393	0.0860806	0.291583
RLatVent	NA	NA	NA	NA	NA	NA	NA	NA	NA	NA	NA	NA	NA	NA	NA
